# Supplementary material for: Differential contagiousness of respiratory disease across the United States
Source: bioRxiv or medRxiv preprint supplement (doi:10.1101/2022.09.15.22279948), 2022-09-17

# Los Angeles-Long Beach-Anaheim, CA

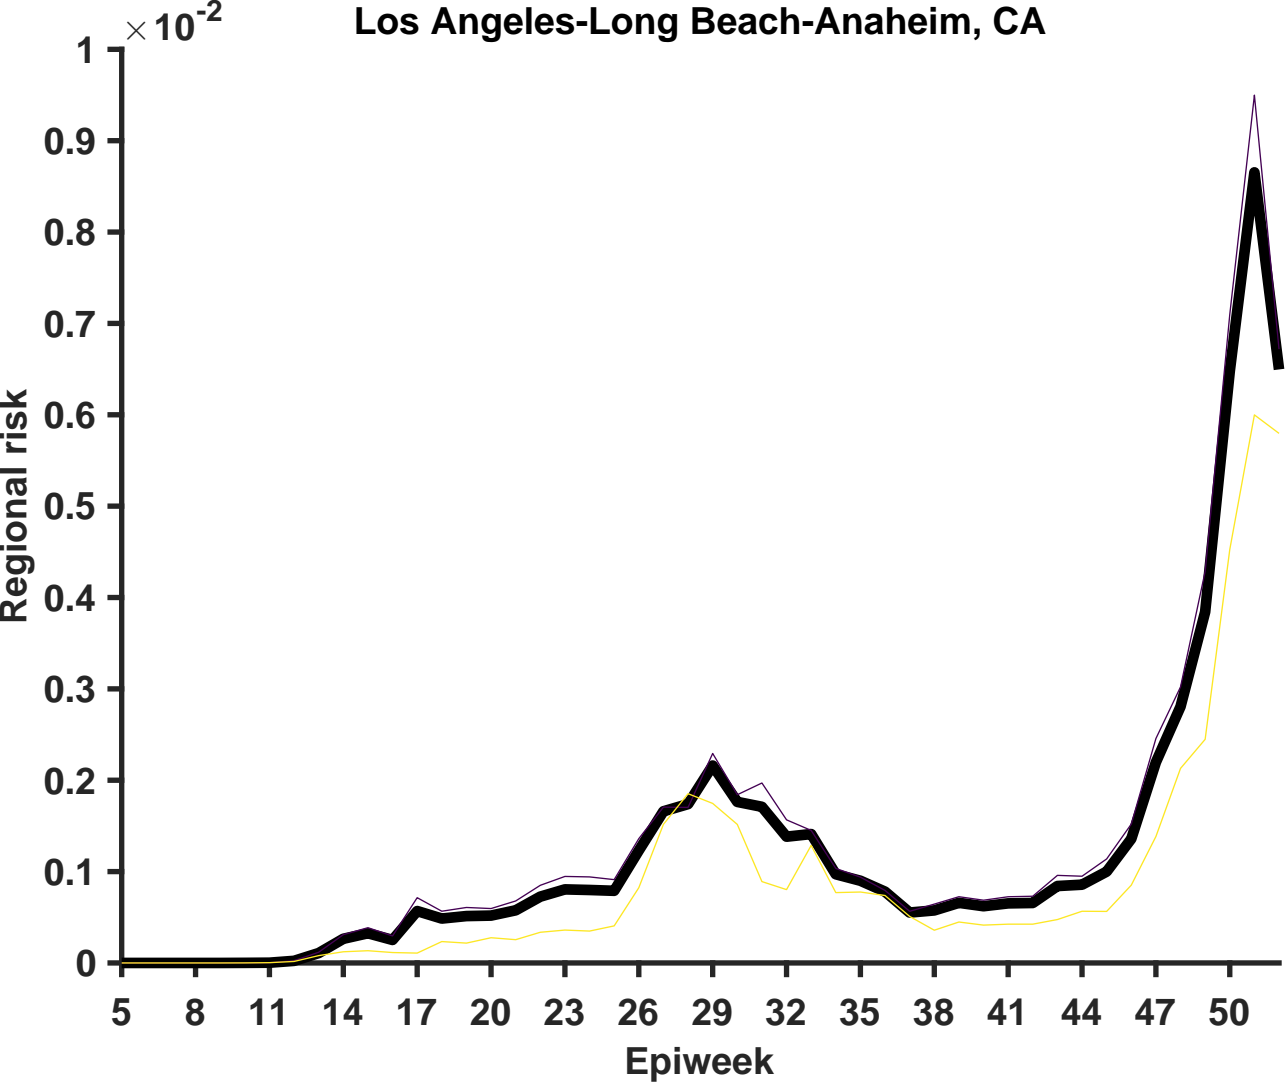

# Chicago-Naperville-Elgin, IL-IN-WI

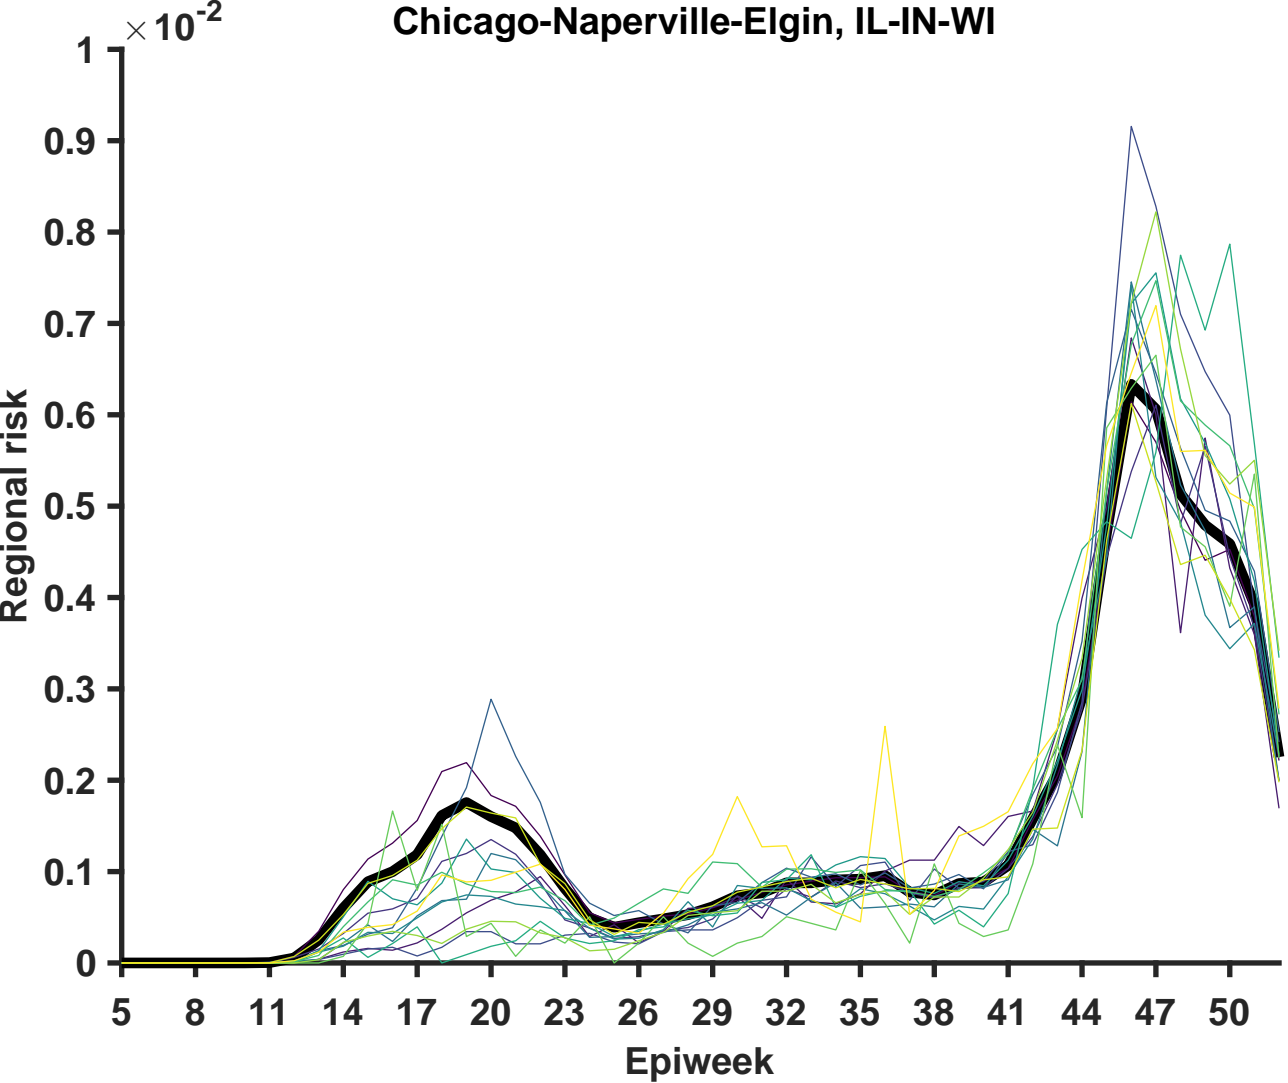

# Dallas-Fort Worth-Arlington, TX

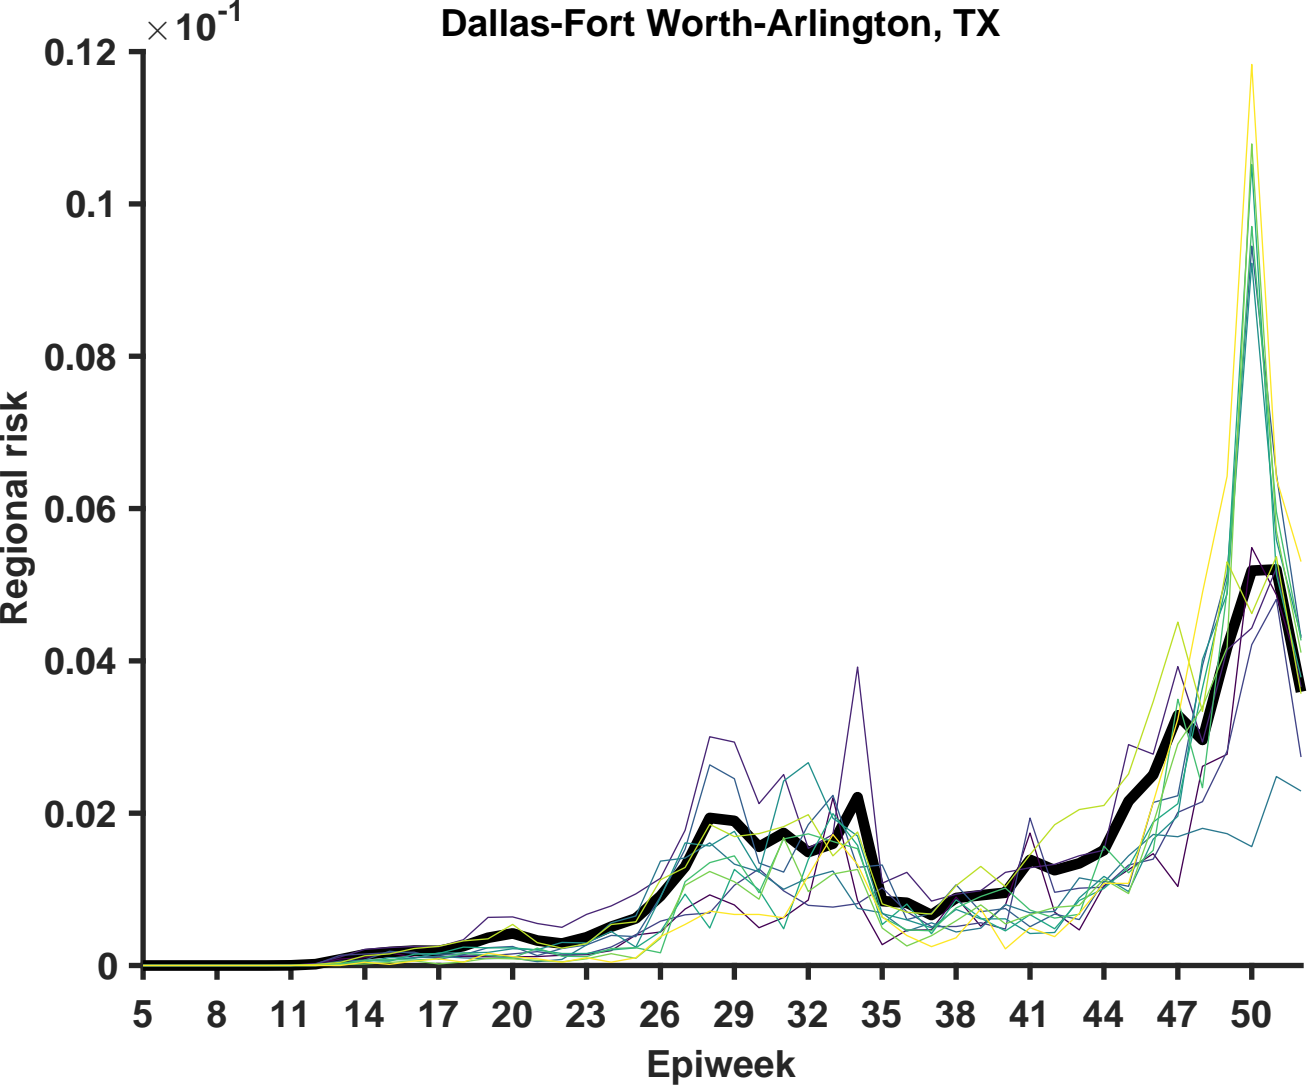

# Houston-The Woodlands-Sugar Land, TX

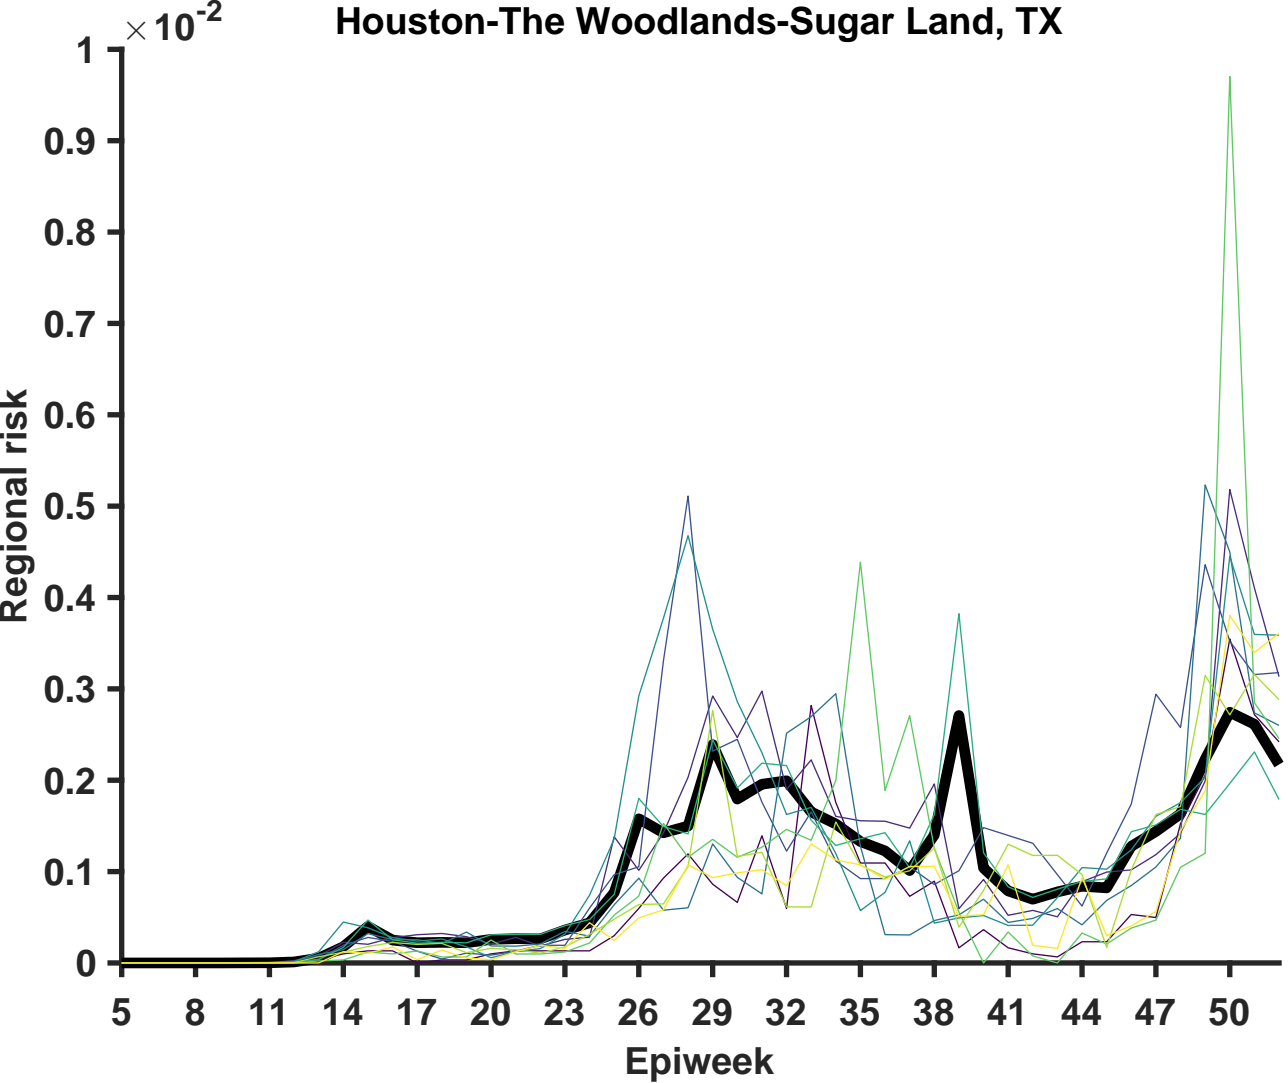

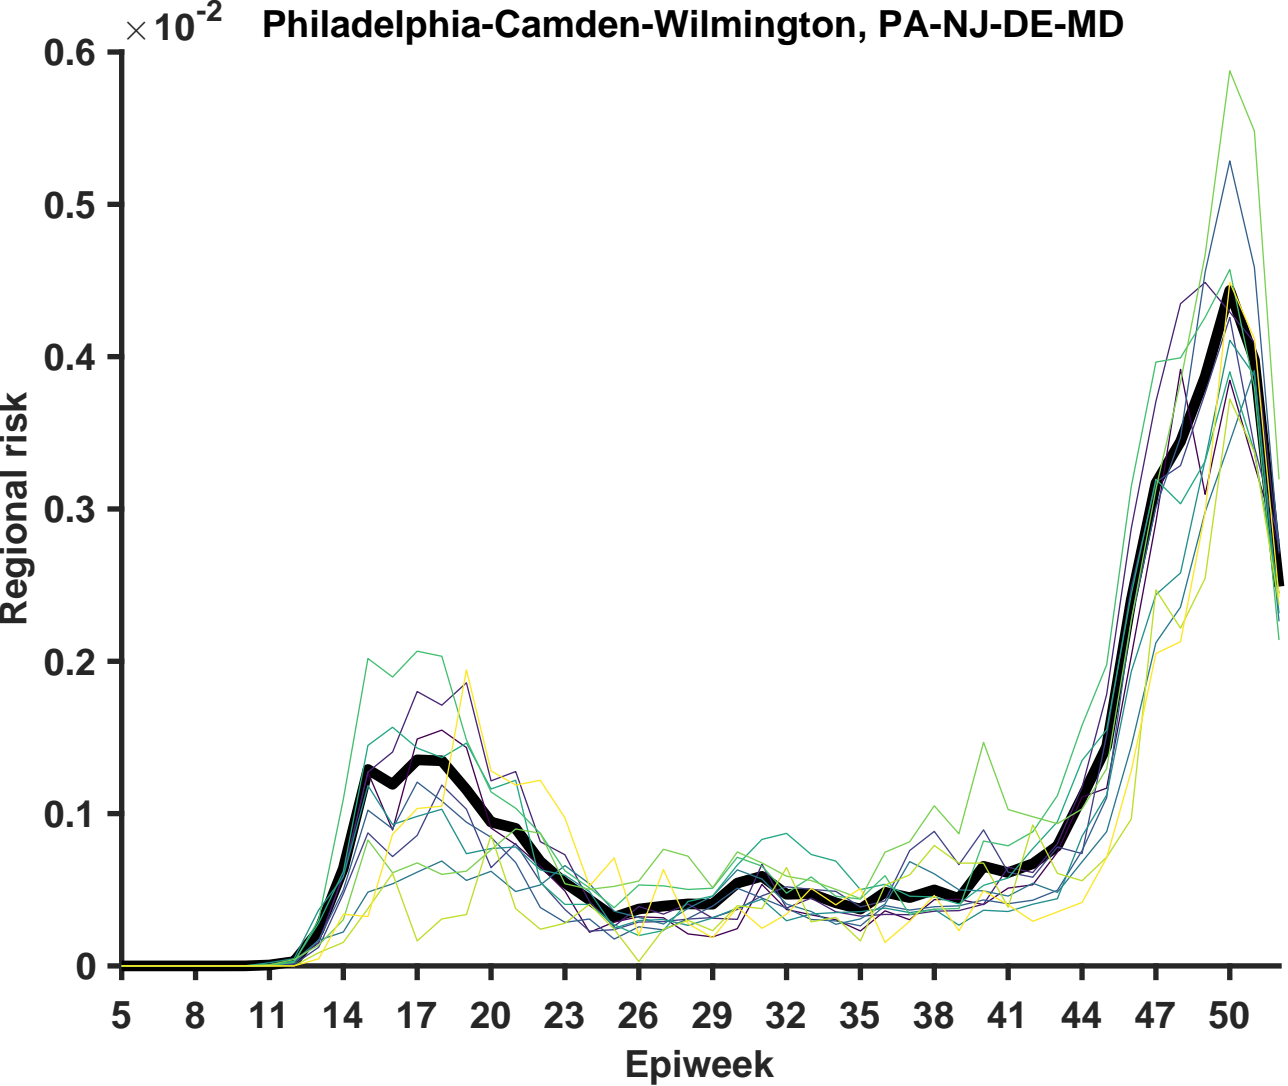

# Miami-Fort Lauderdale-West Palm Beach, FL

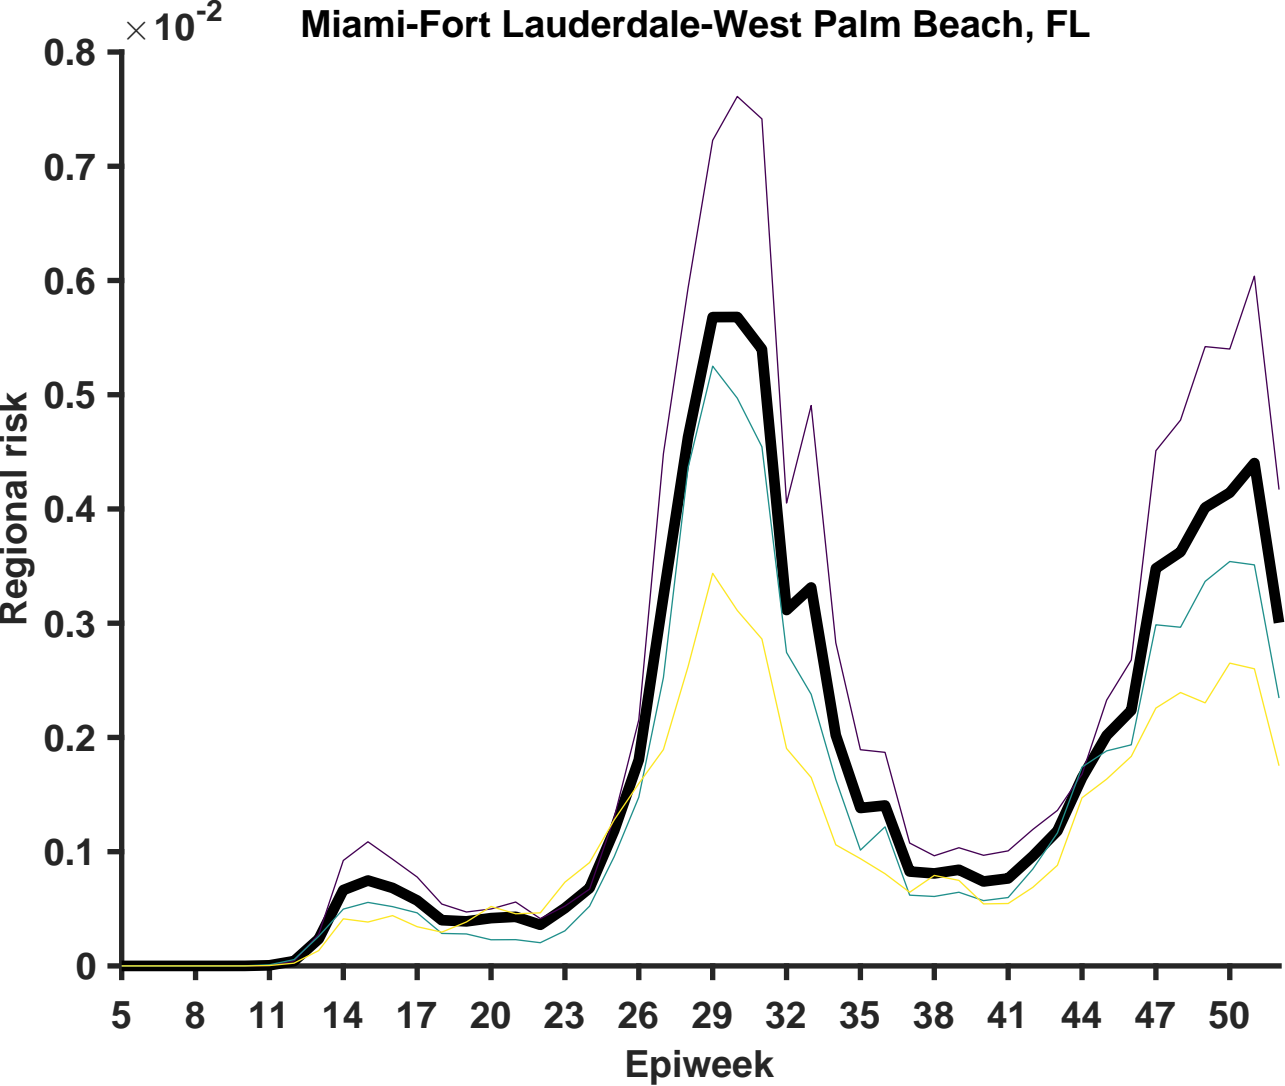

# Boston-Cambridge-Newton, MA-NH

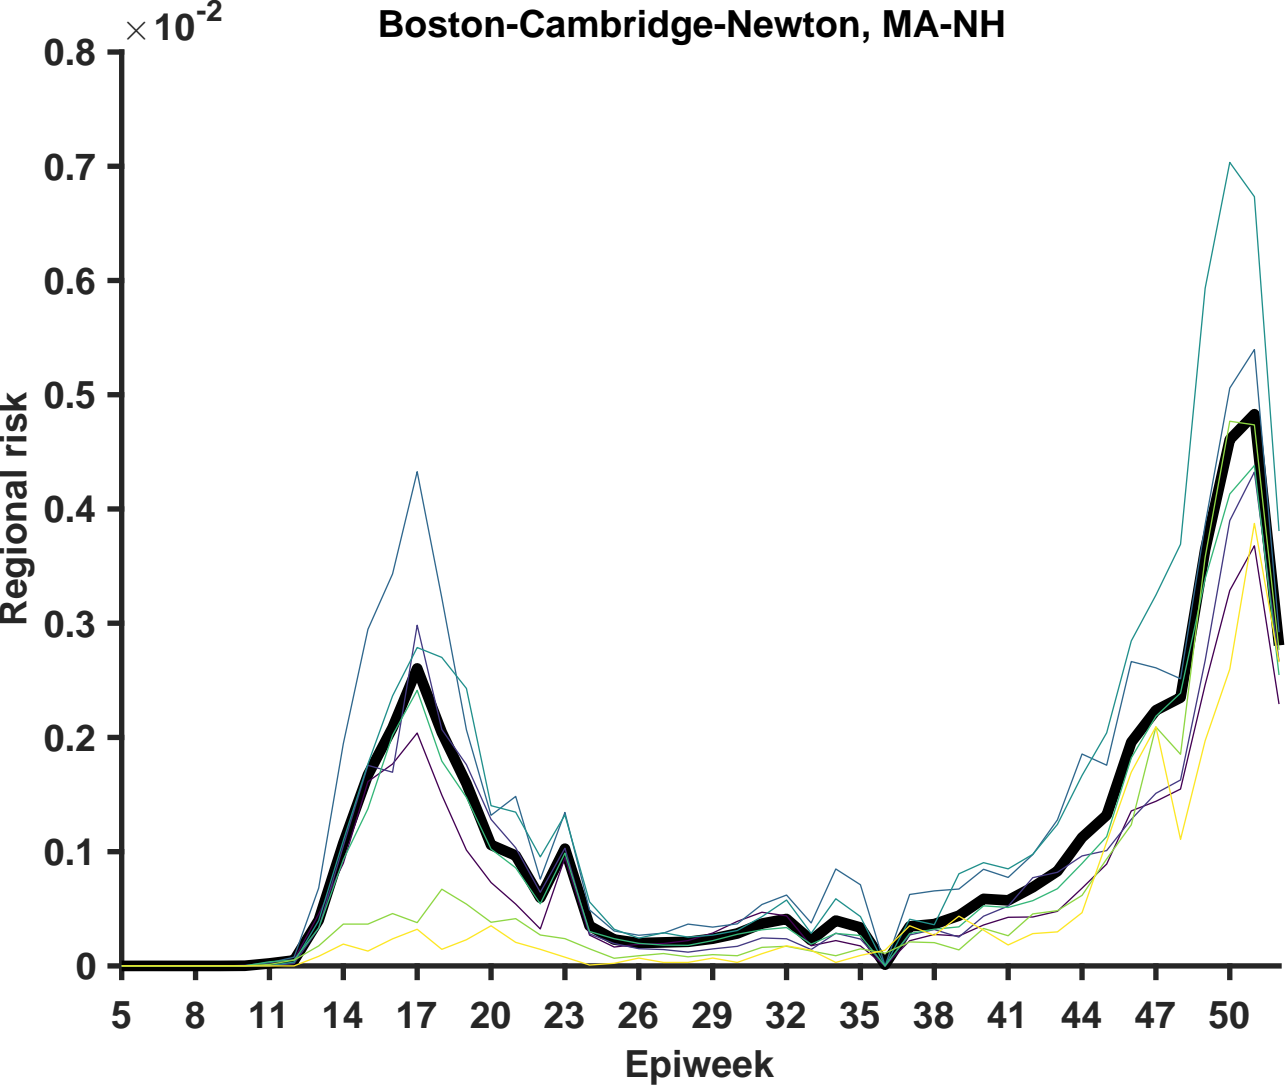

# Phoenix-Mesa-Chandler, AZ

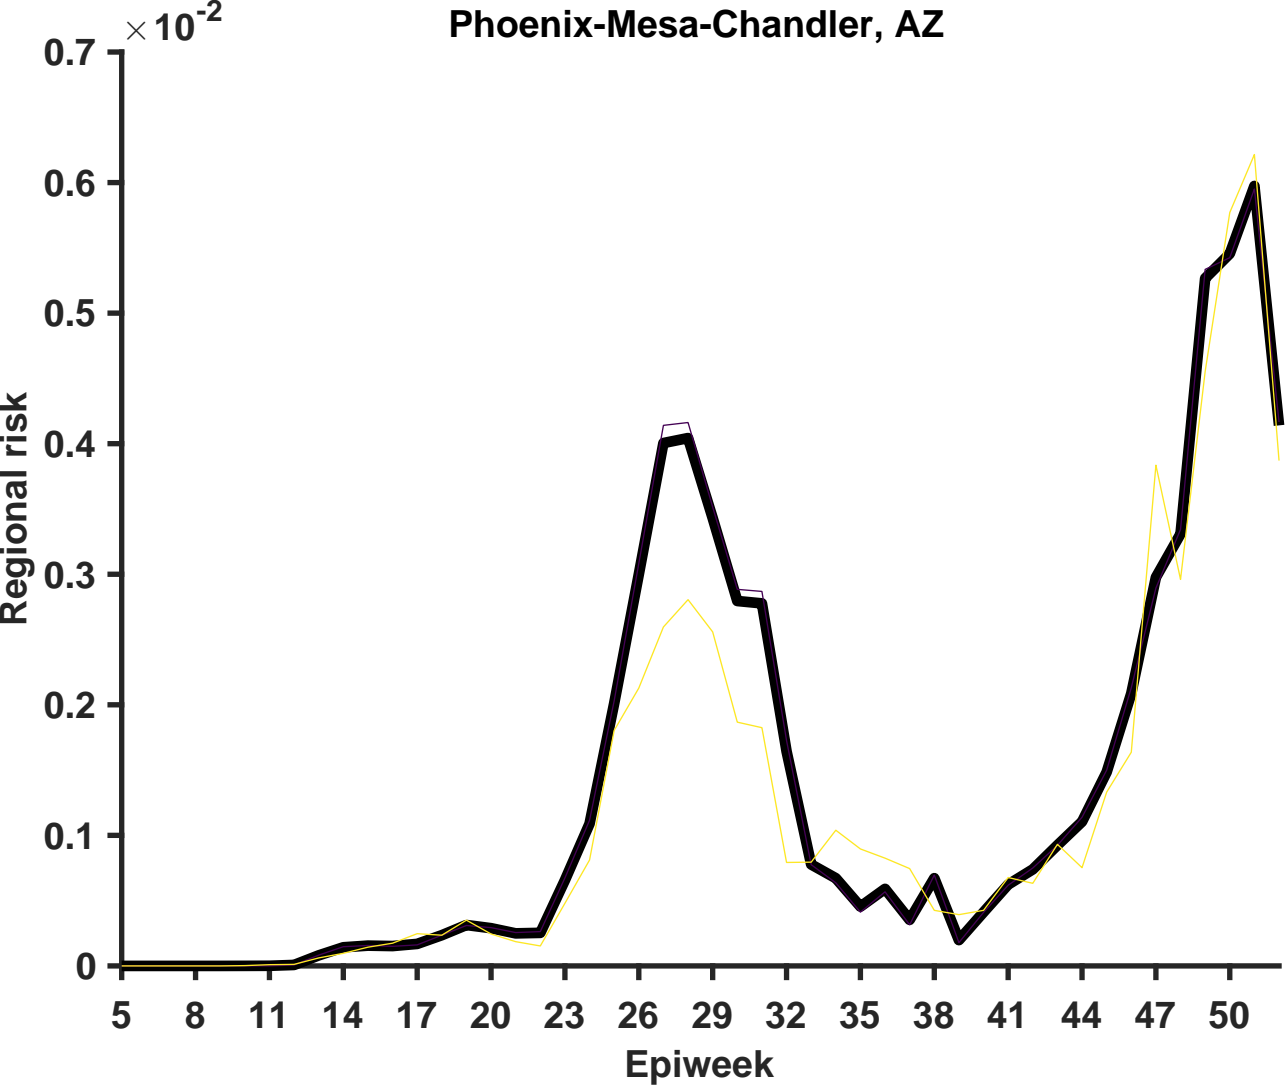



# San Francisco-Oakland-Berkeley, CA

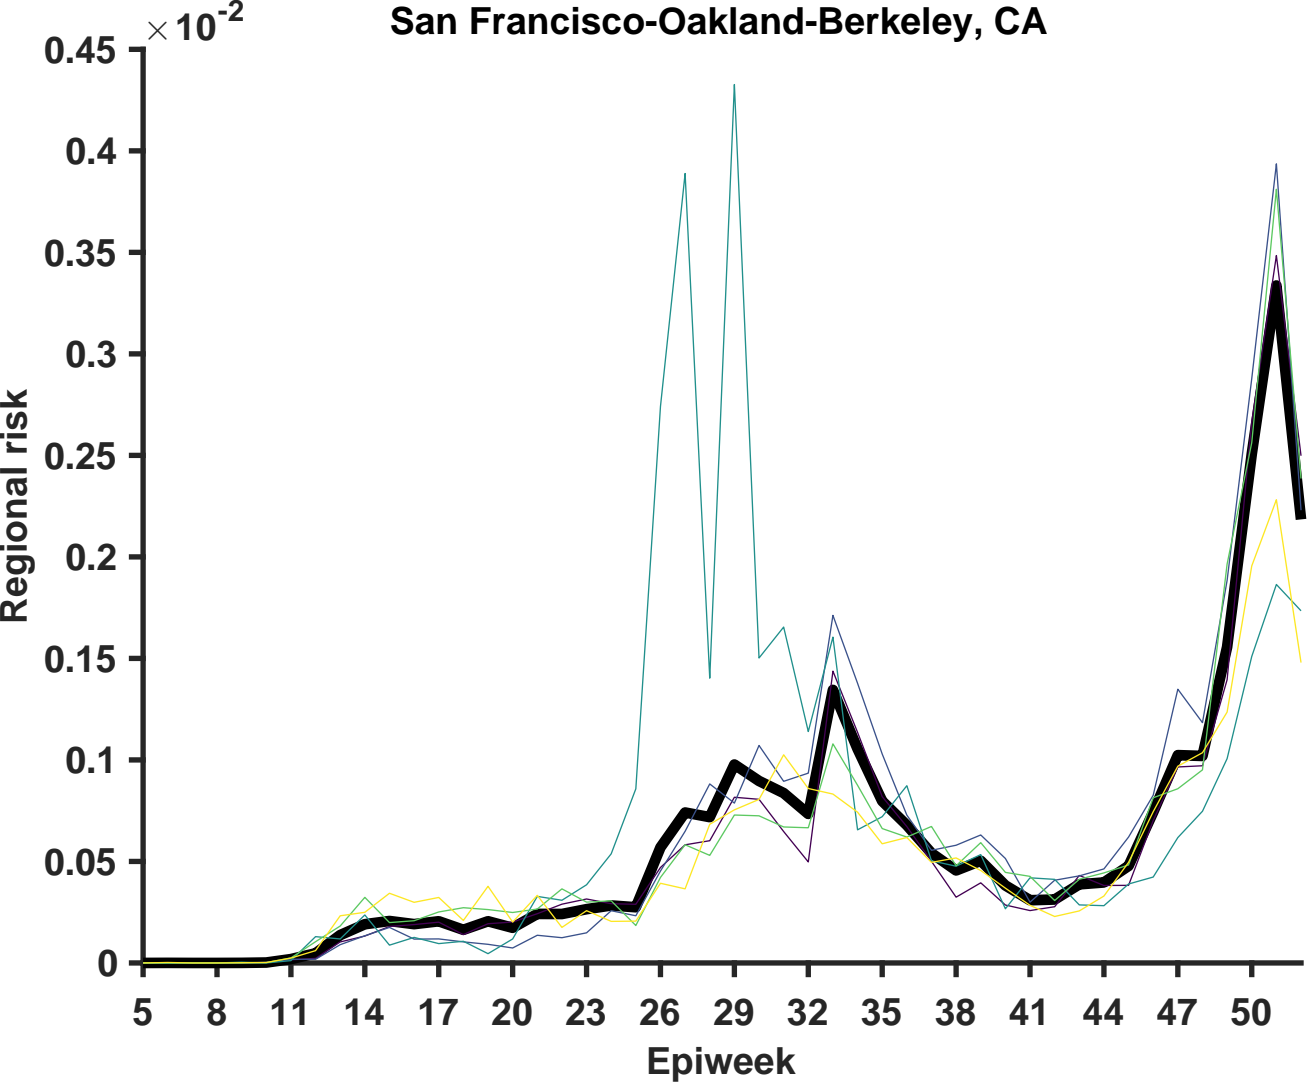

# Riverside-San Bernardino-Ontario, CA

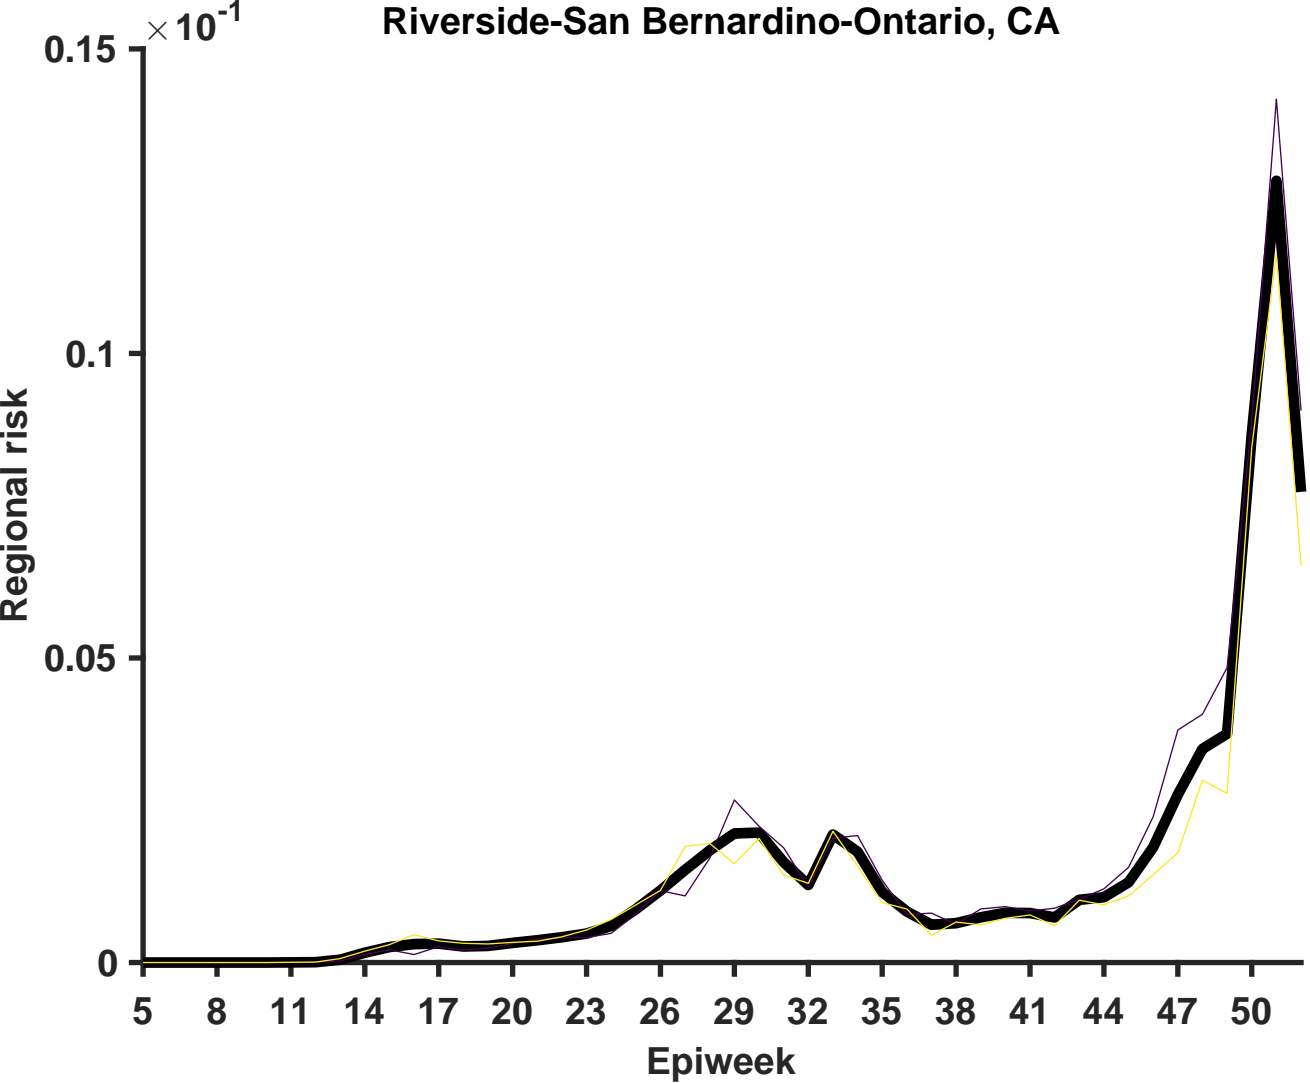

# Detroit–Warren–Dearborn, MI

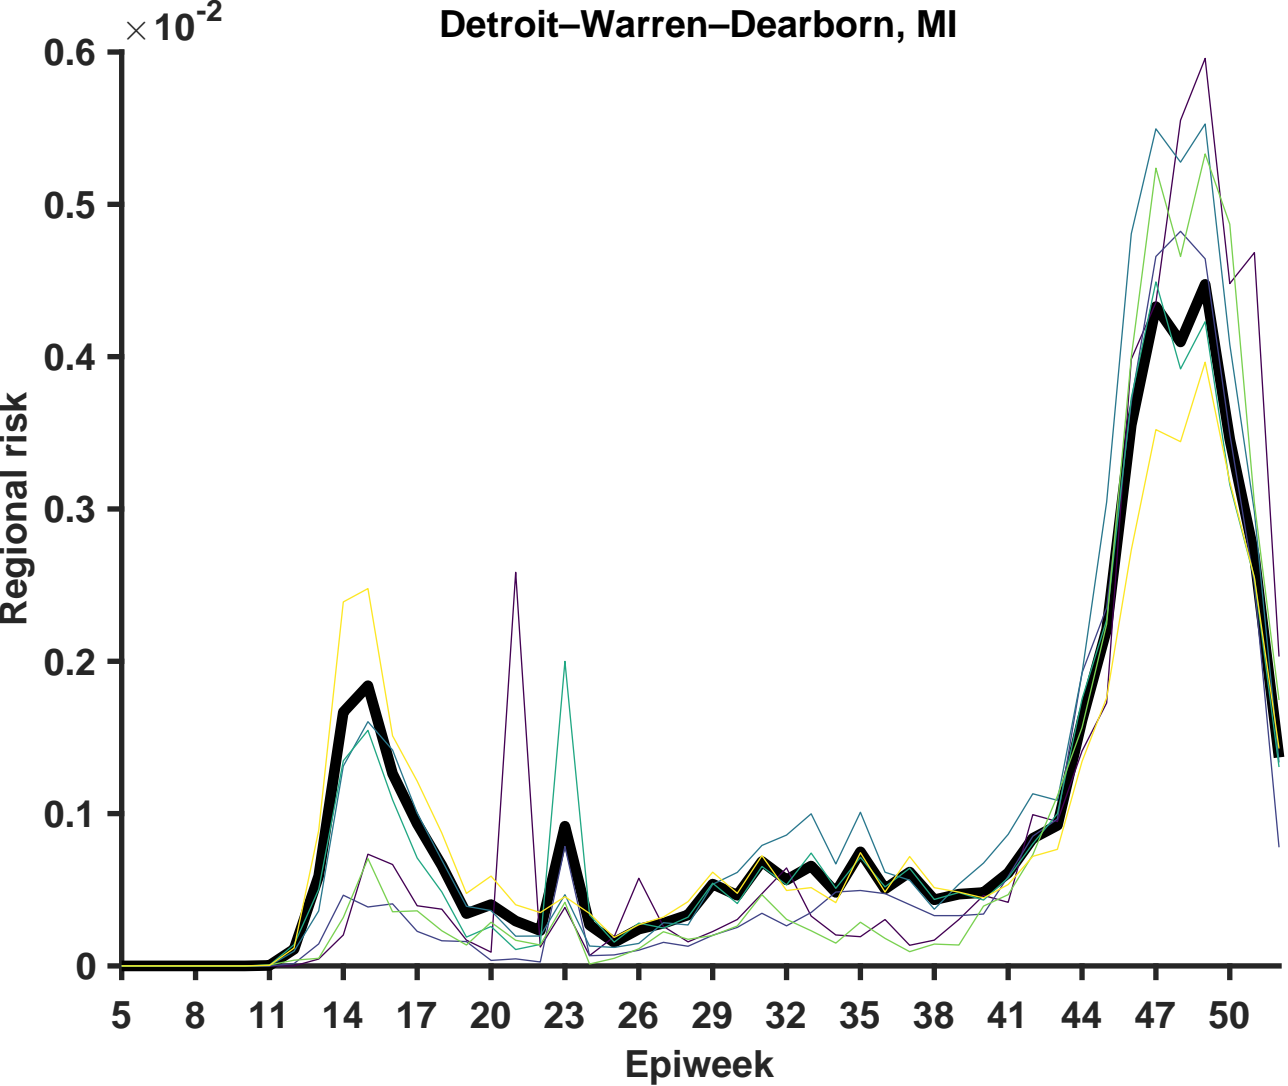

# Seattle-Tacoma-Bellevue, WA

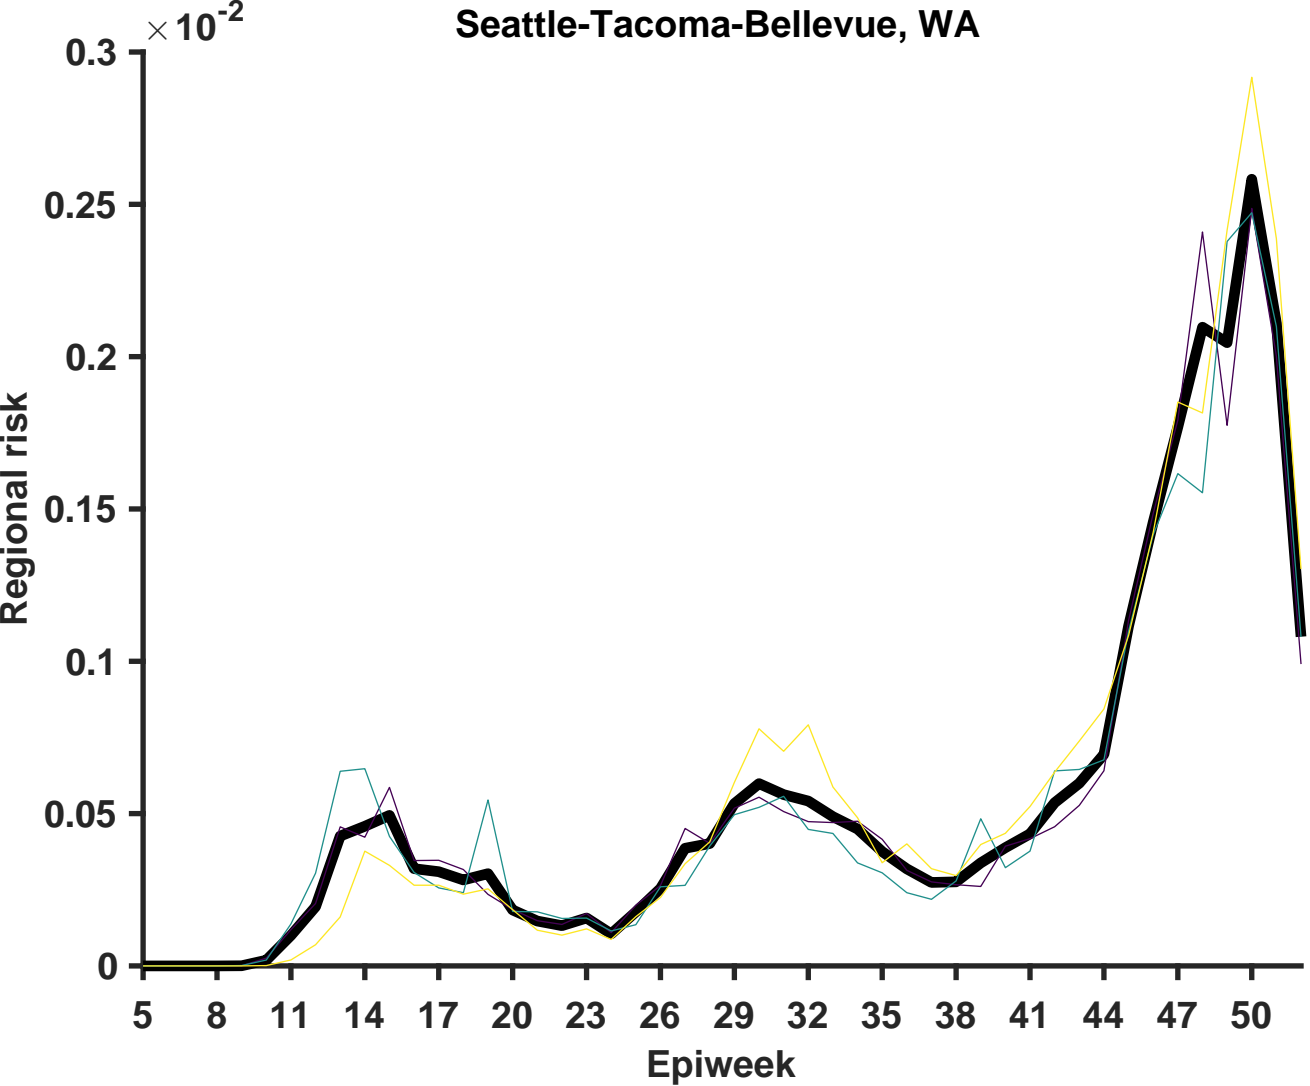

# Minneapolis-St. Paul-Bloomington, MN-WI

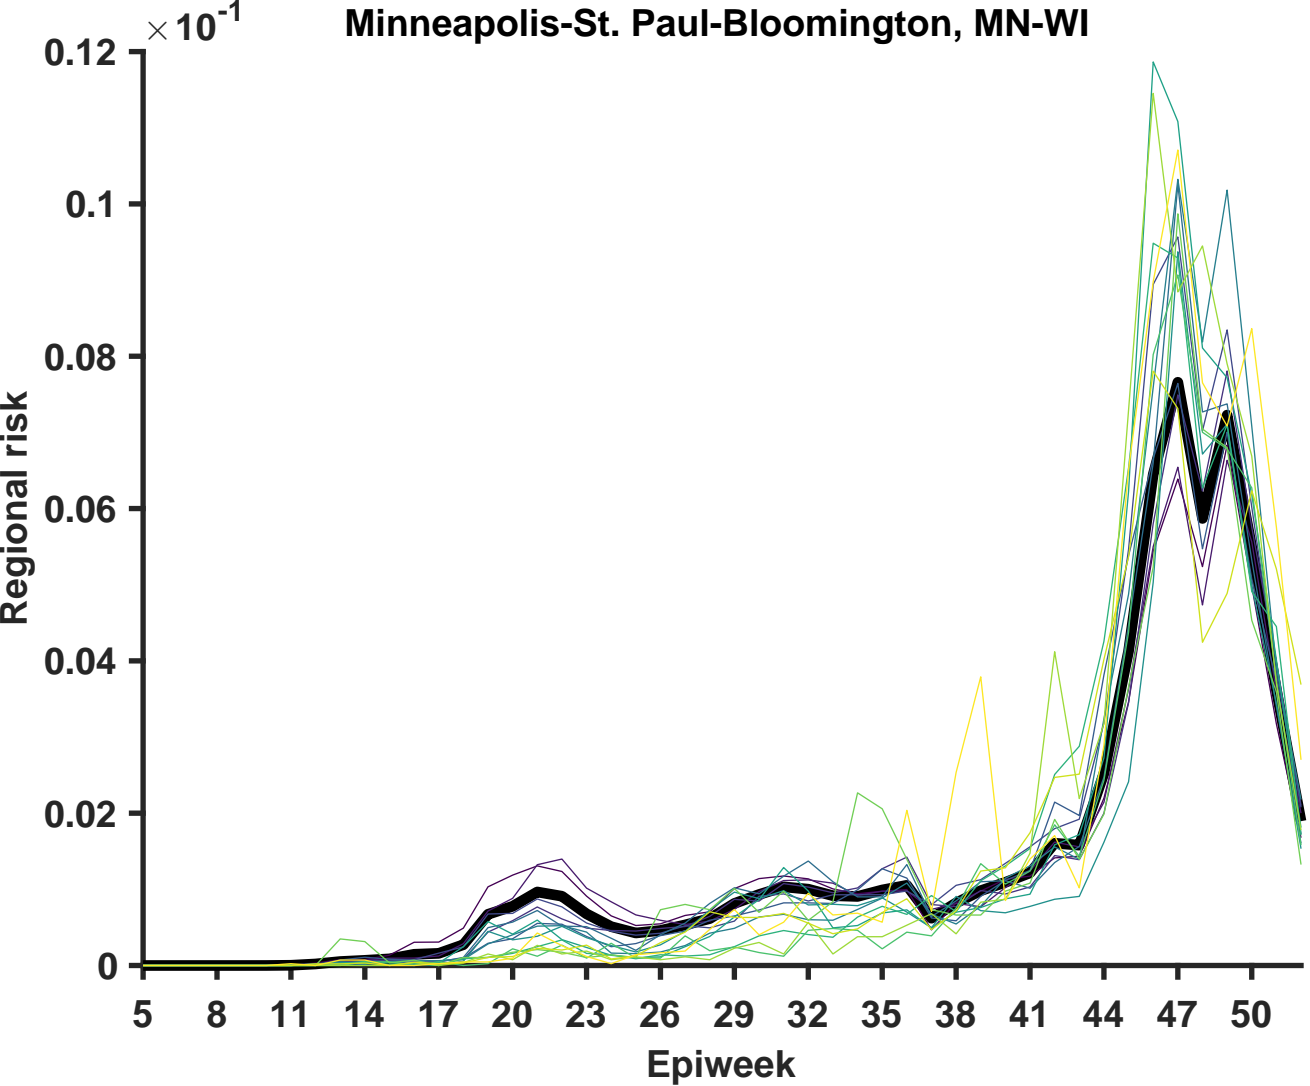

# Tampa-St. Petersburg-Clearwater, FL

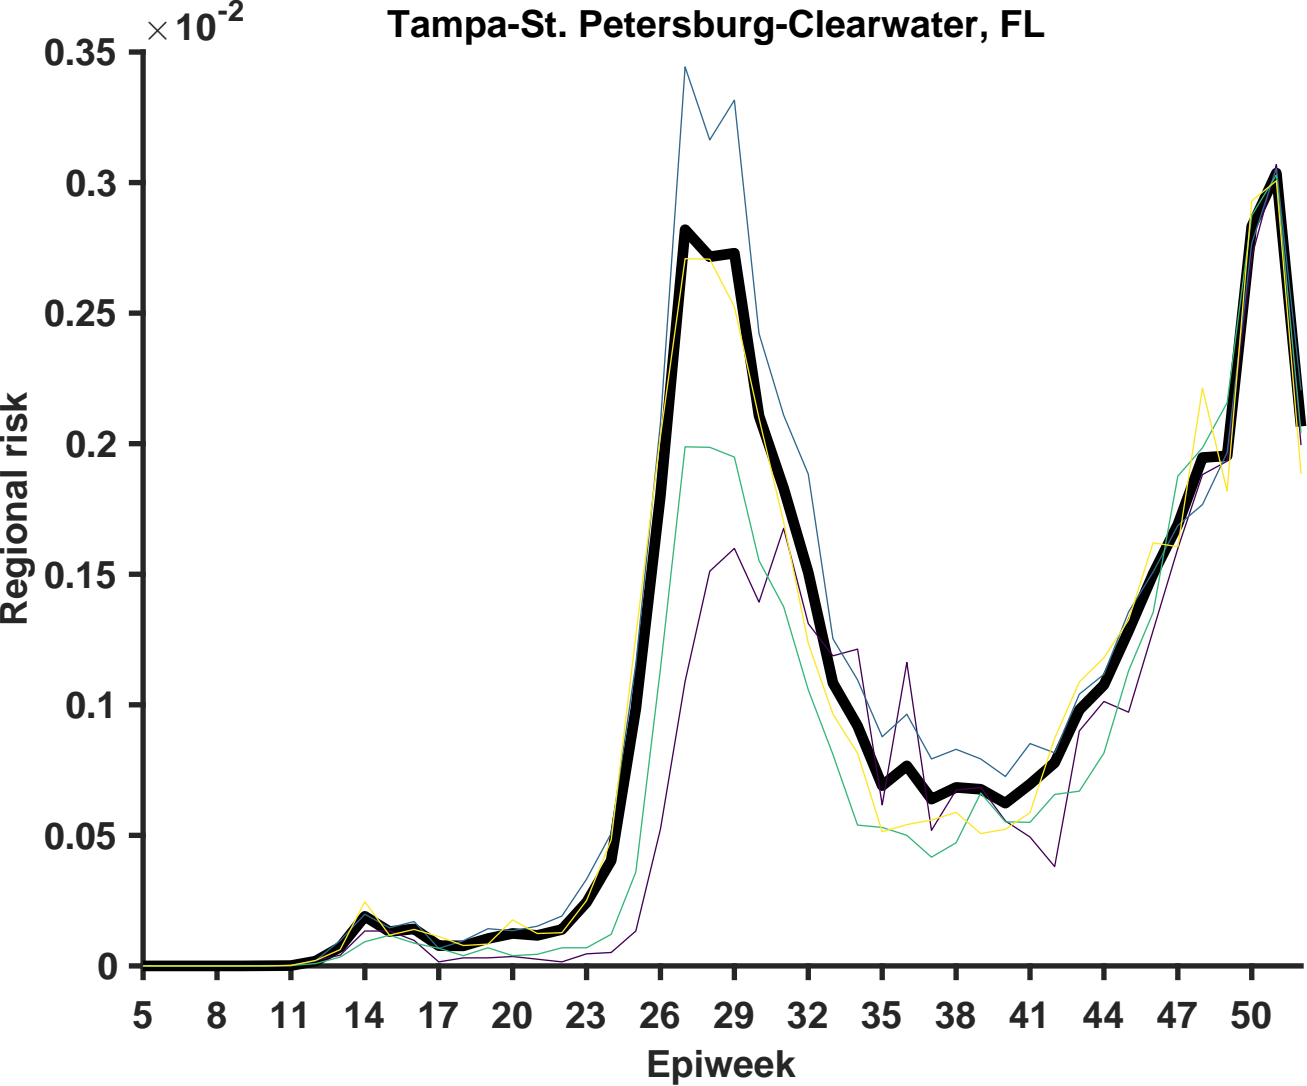

# Denver-Aurora-Lakewood, CO

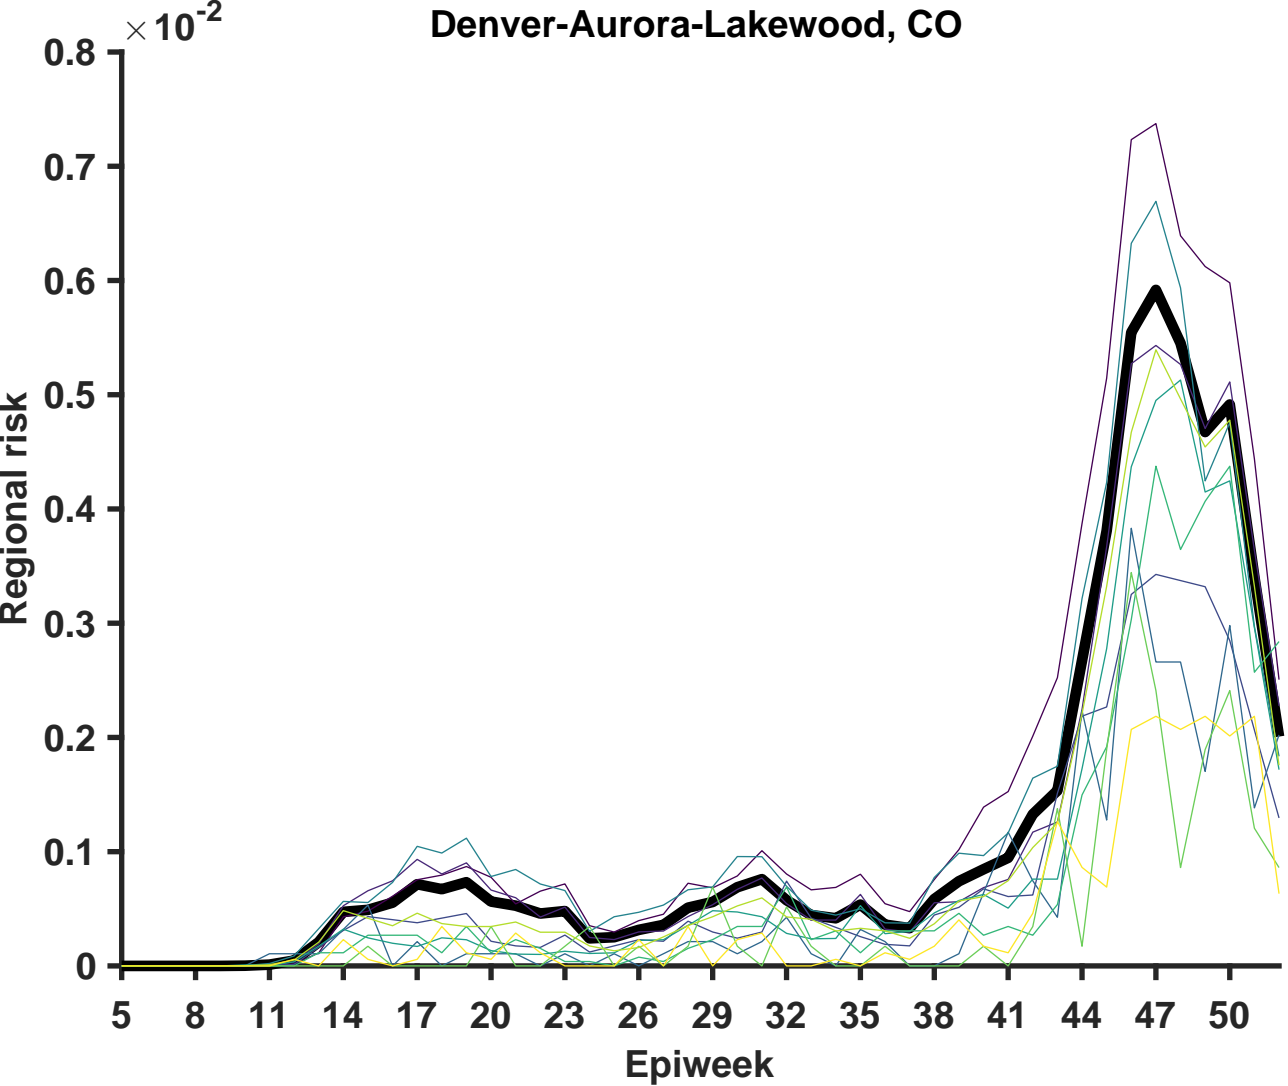

# Baltimore-Columbia-Towson, MD

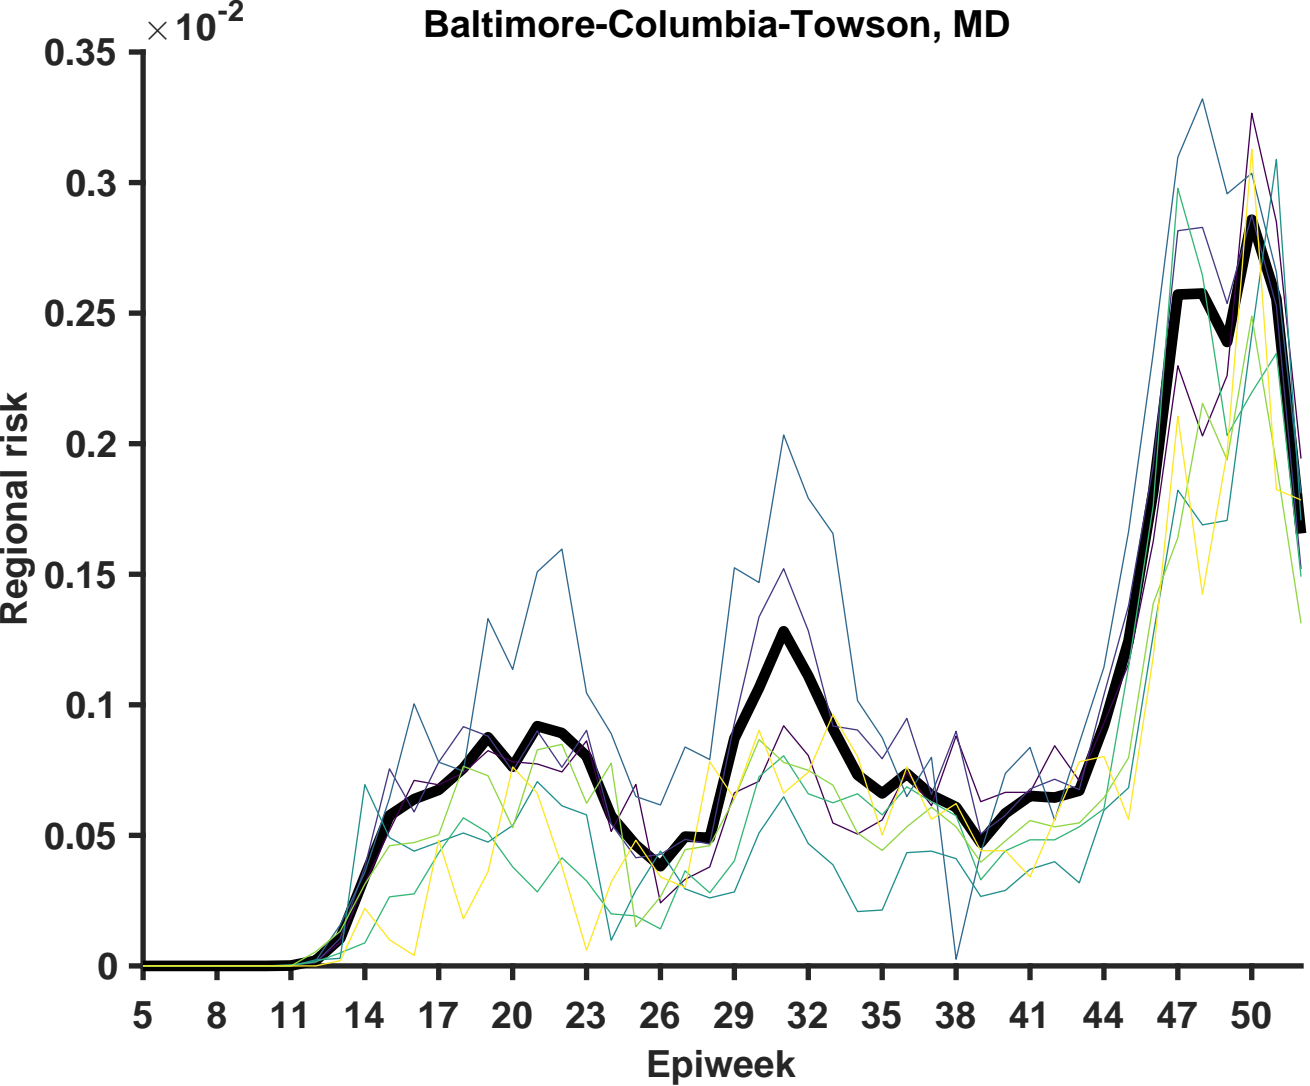



# St. Louis, MO-IL

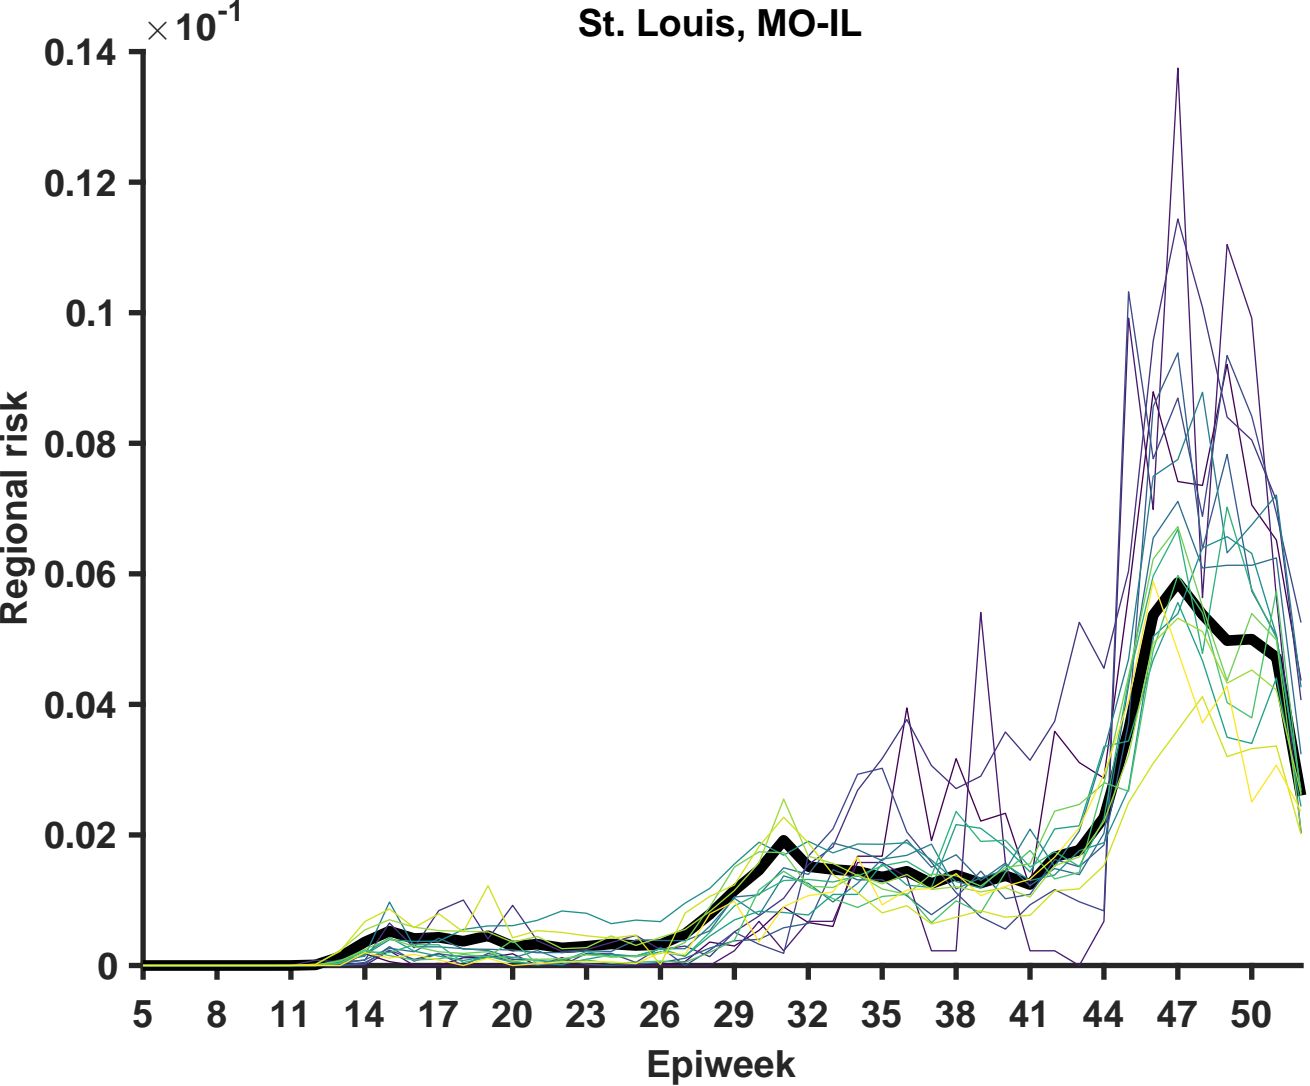

# Orlando-Kissimmee-Sanford, FL

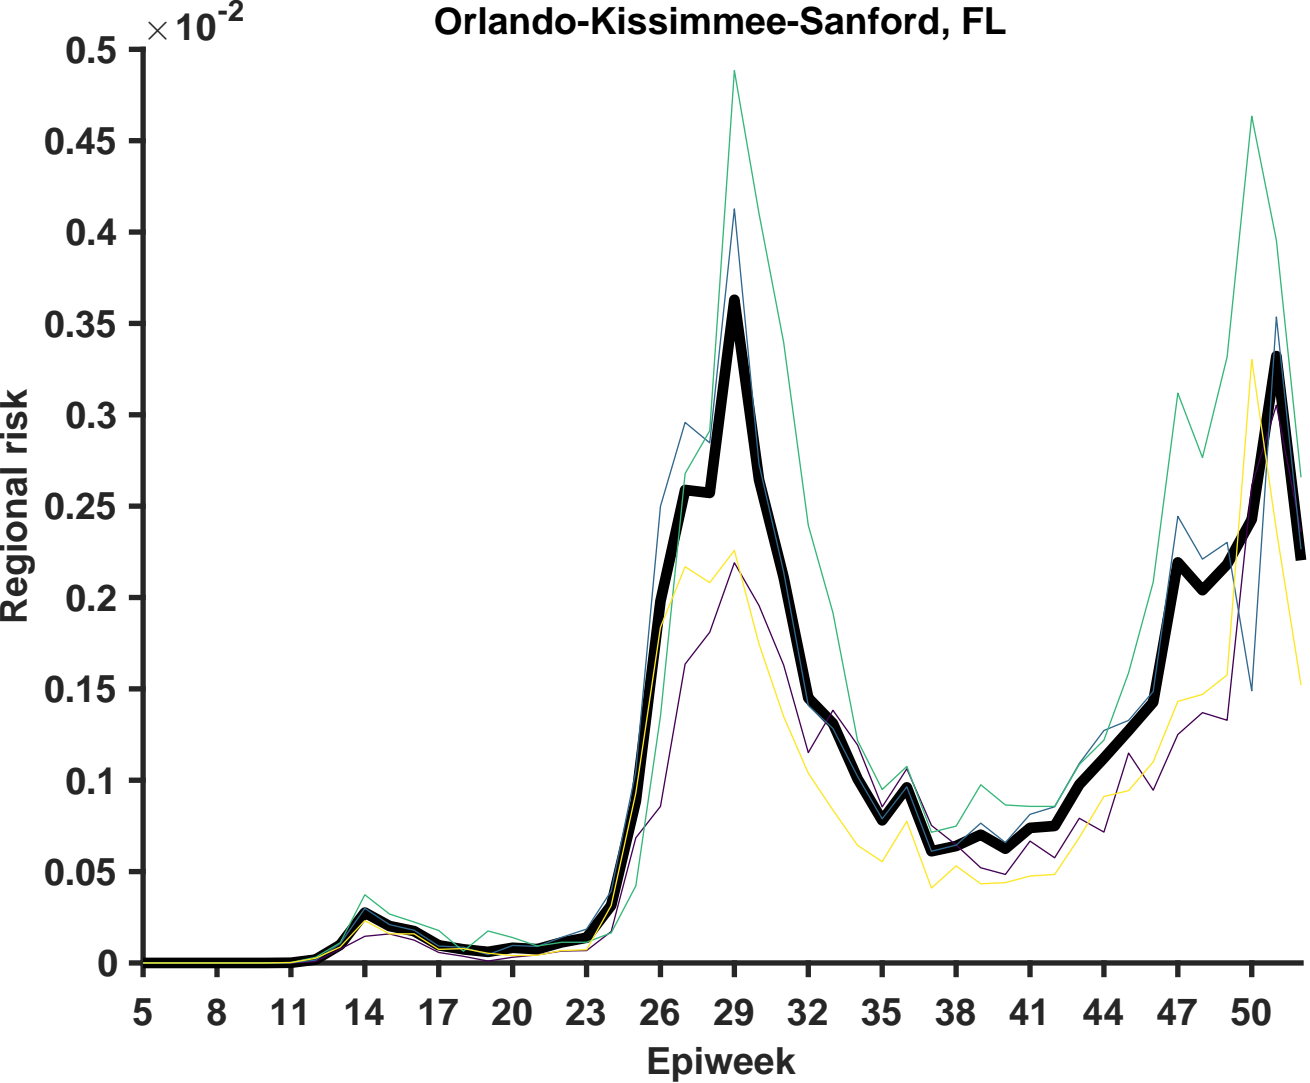

# Charlotte-Concord-Gastonia, NC-SC

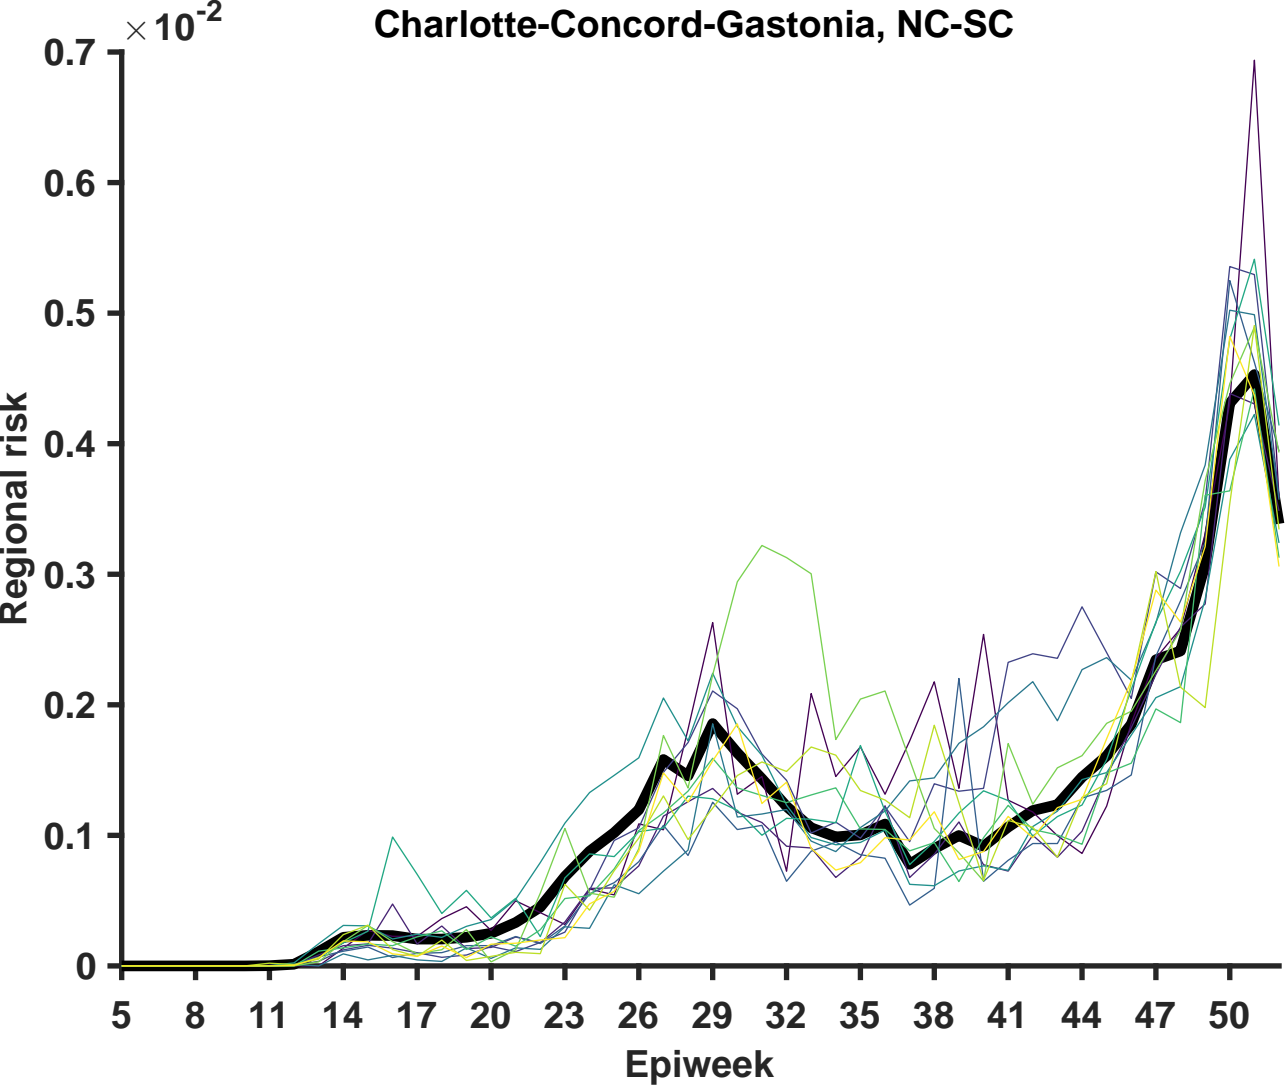

# San Antonio-New Braunfels, TX

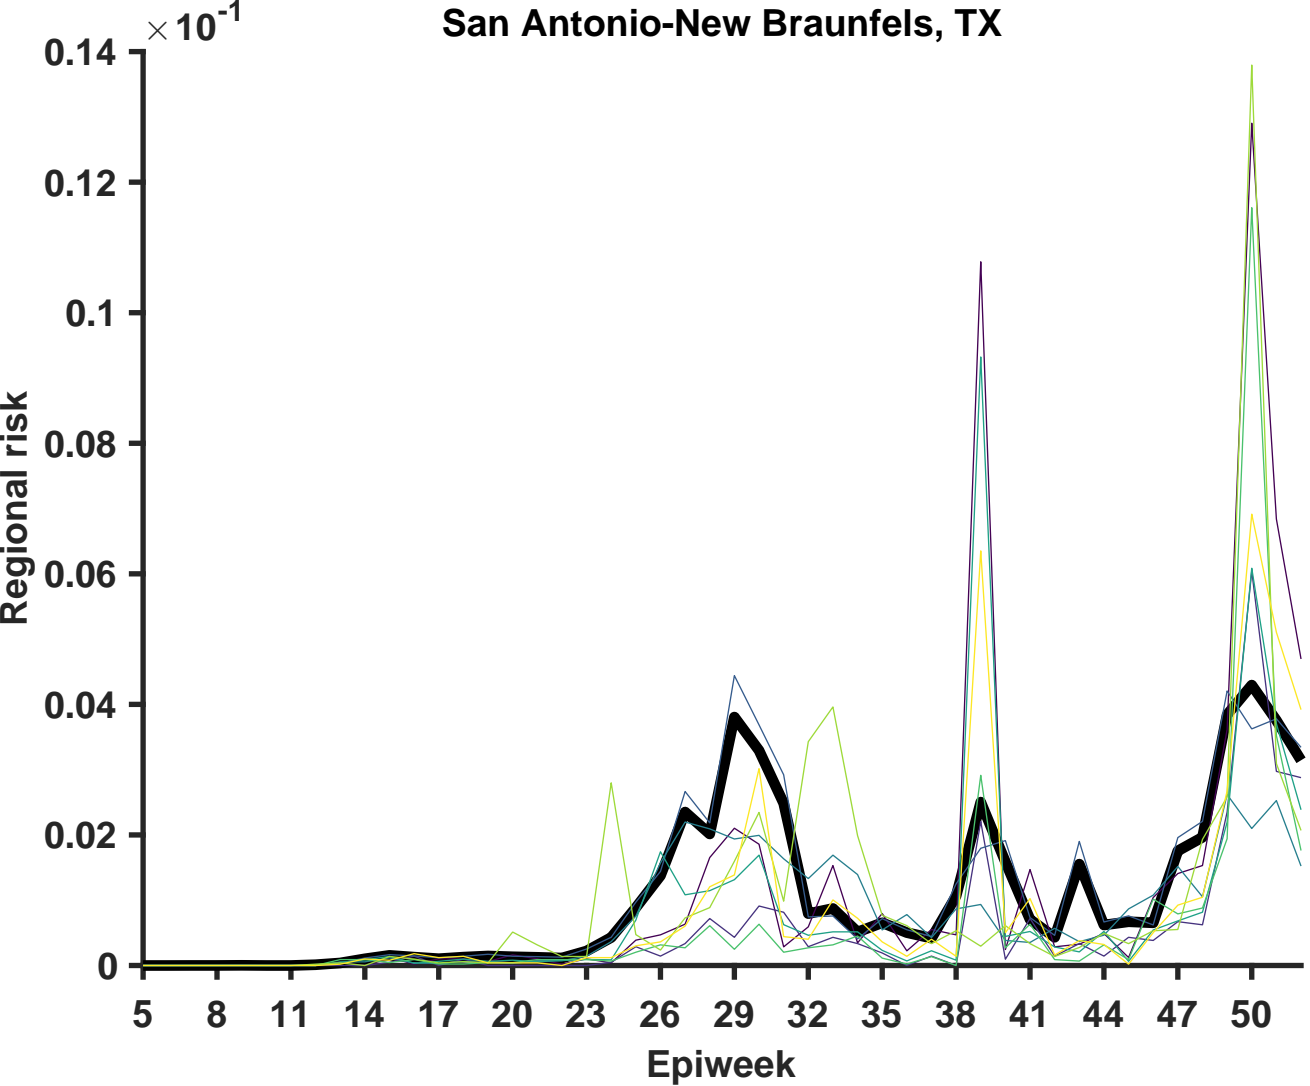

# Portland-Vancouver-Hillsboro, OR-WA

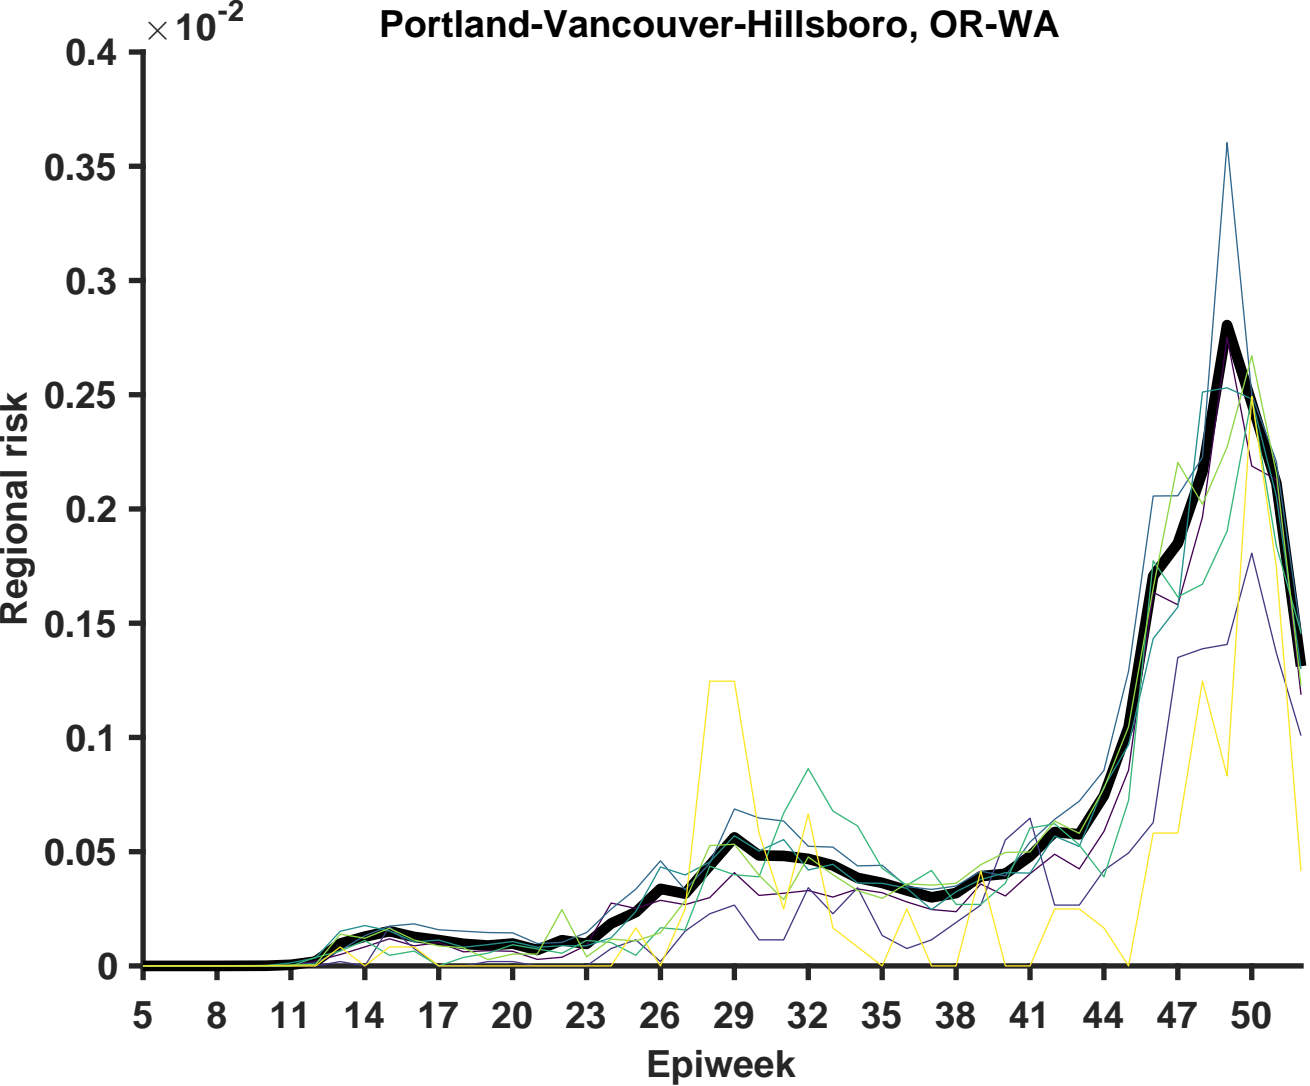

# Sacramento-Roseville-Folsom, CA

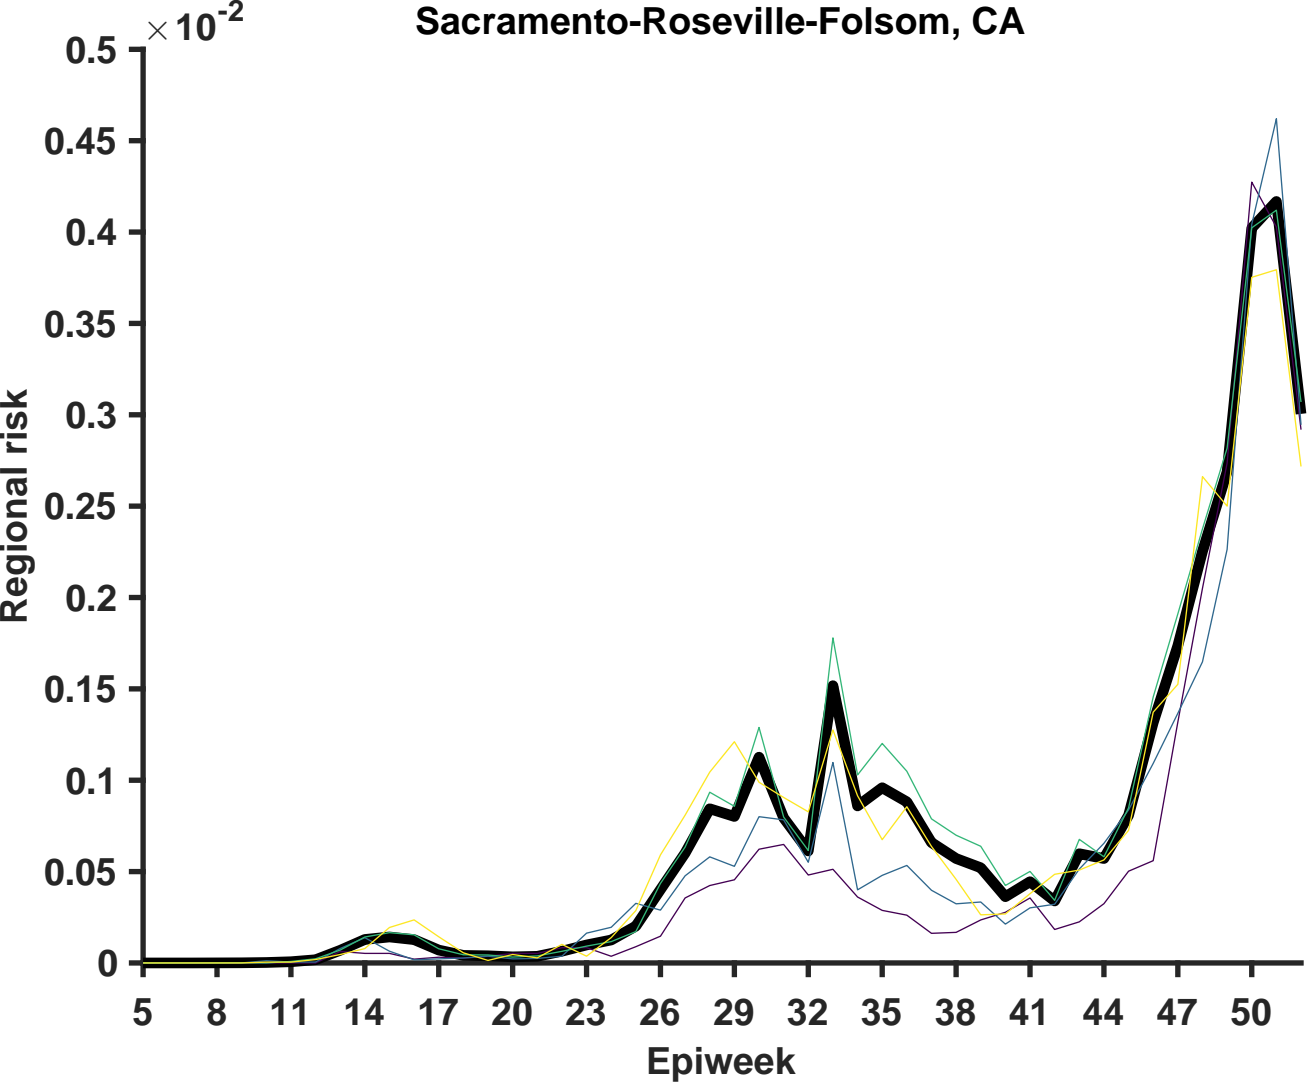

# Pittsburgh, PA

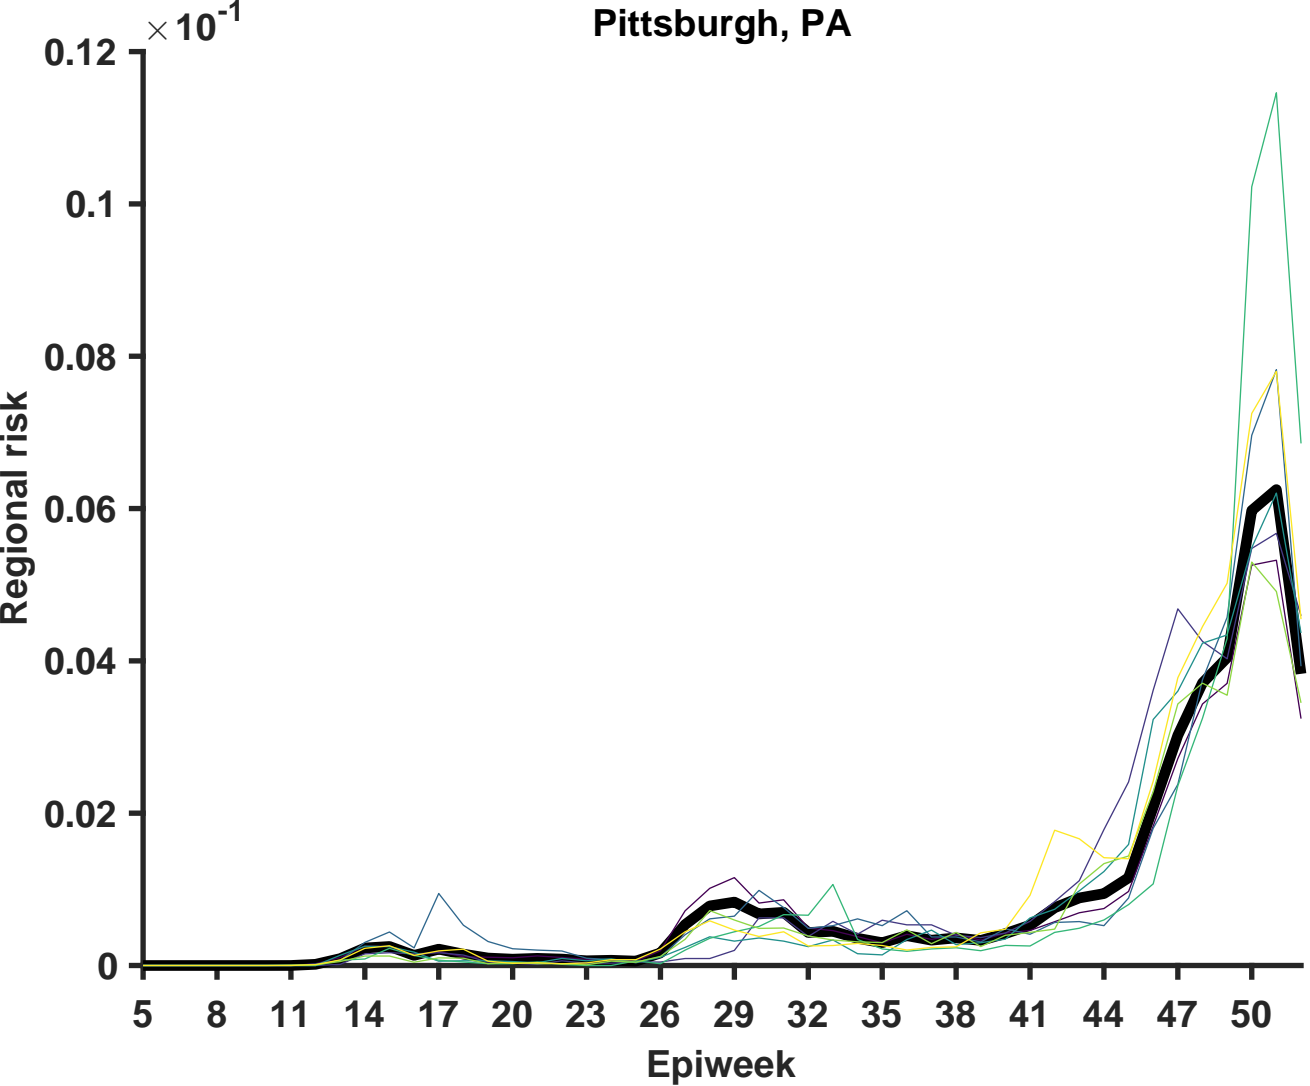

# Austin-Round Rock, TX

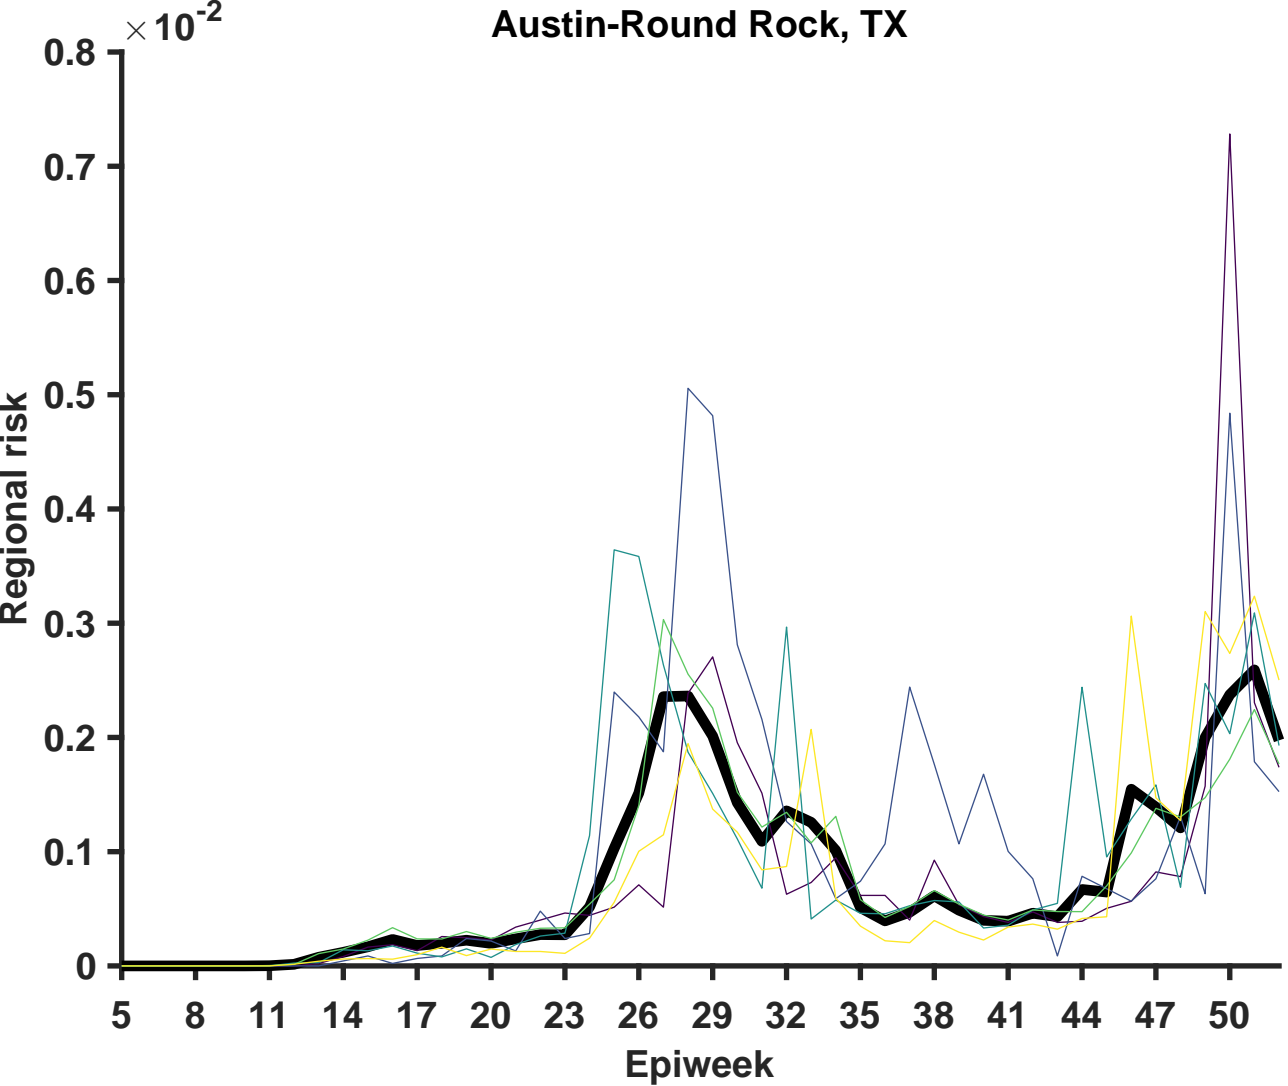



# Cincinnati, OH-KY-IN

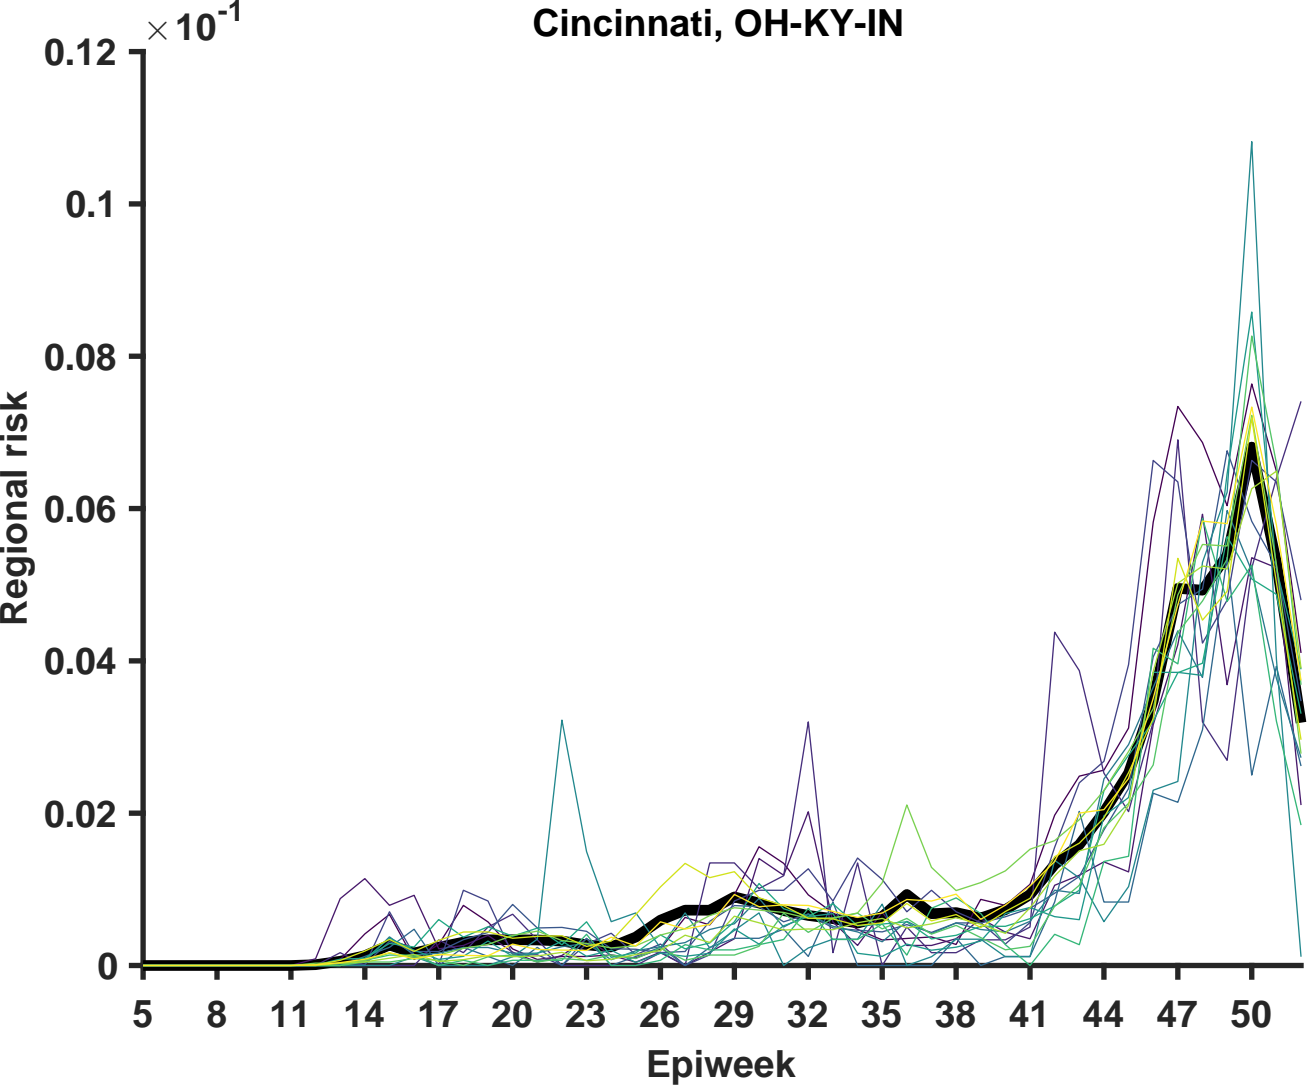

# Kansas City, MO-KS

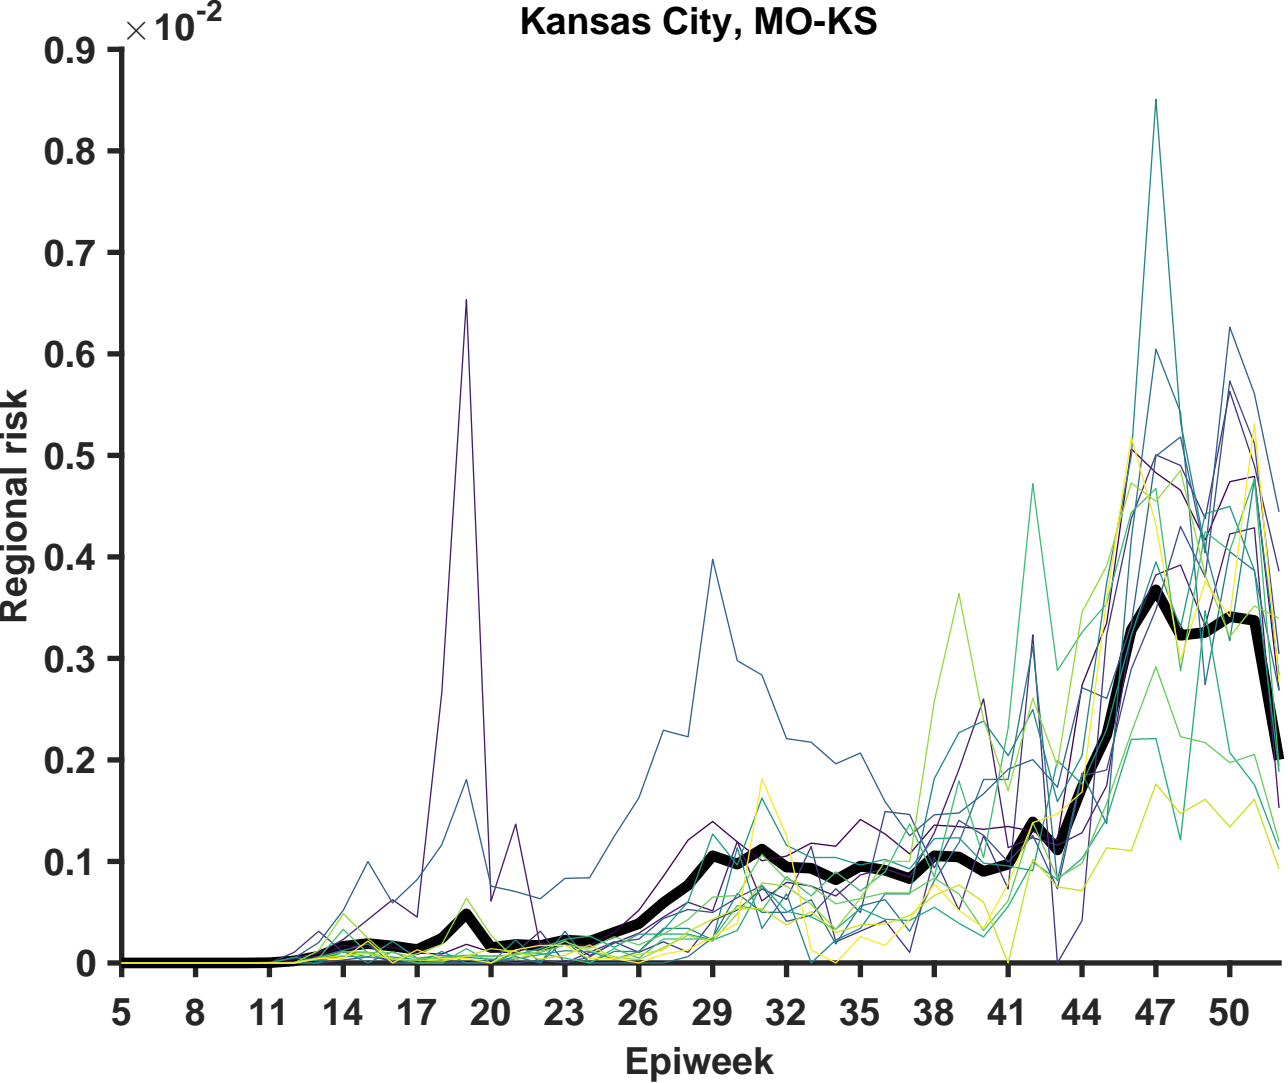

# Columbus, OH

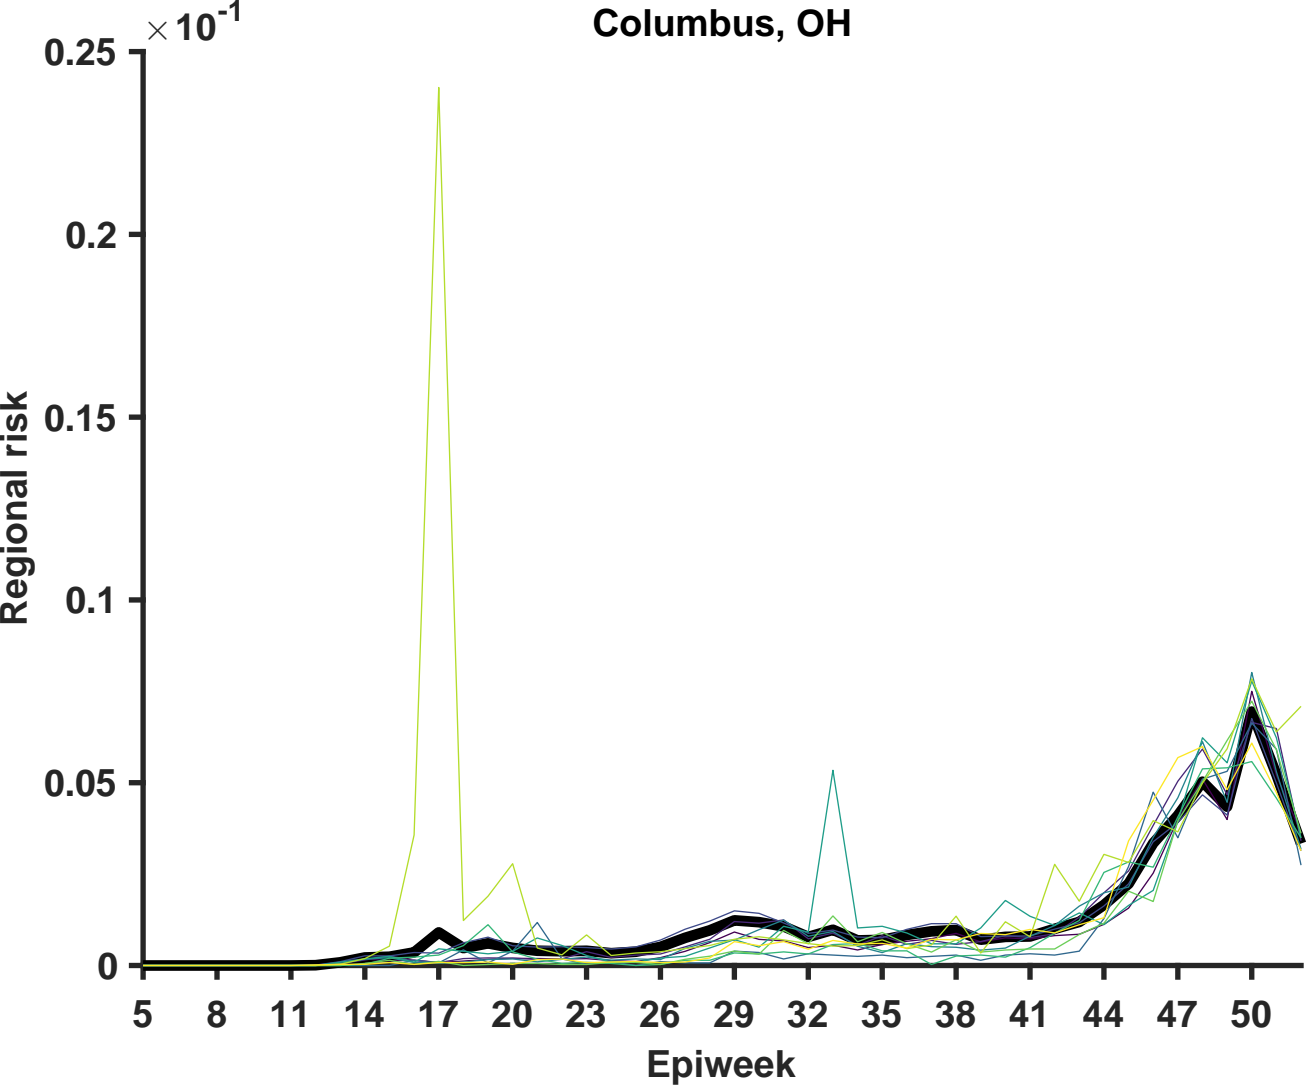

# Indianapolis-Carmel-Anderson, IN

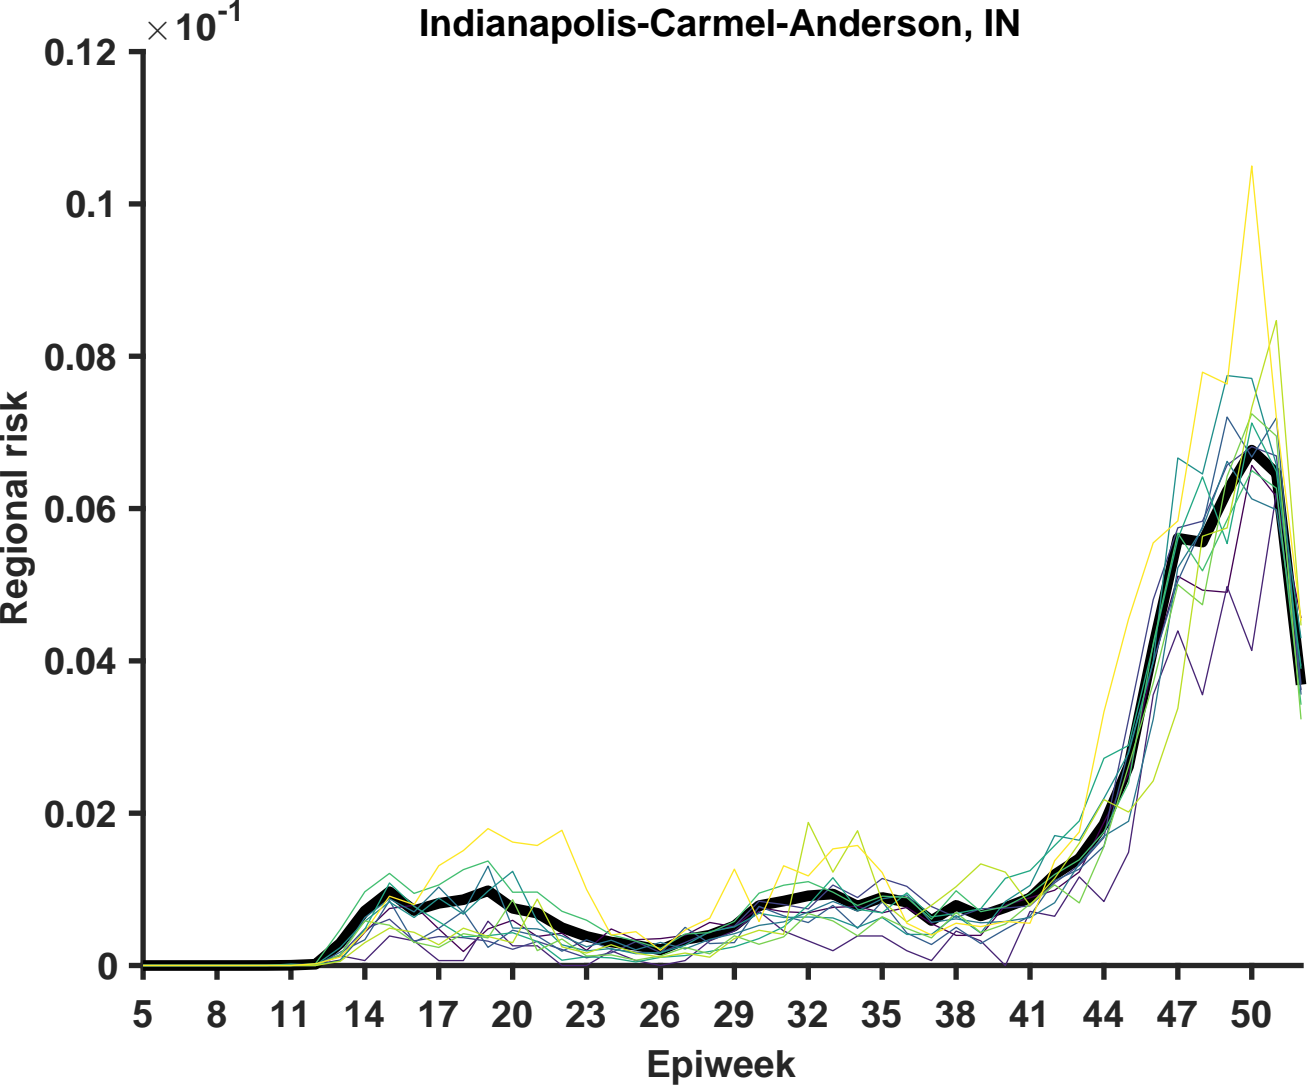

# Cleveland-Elyria, OH

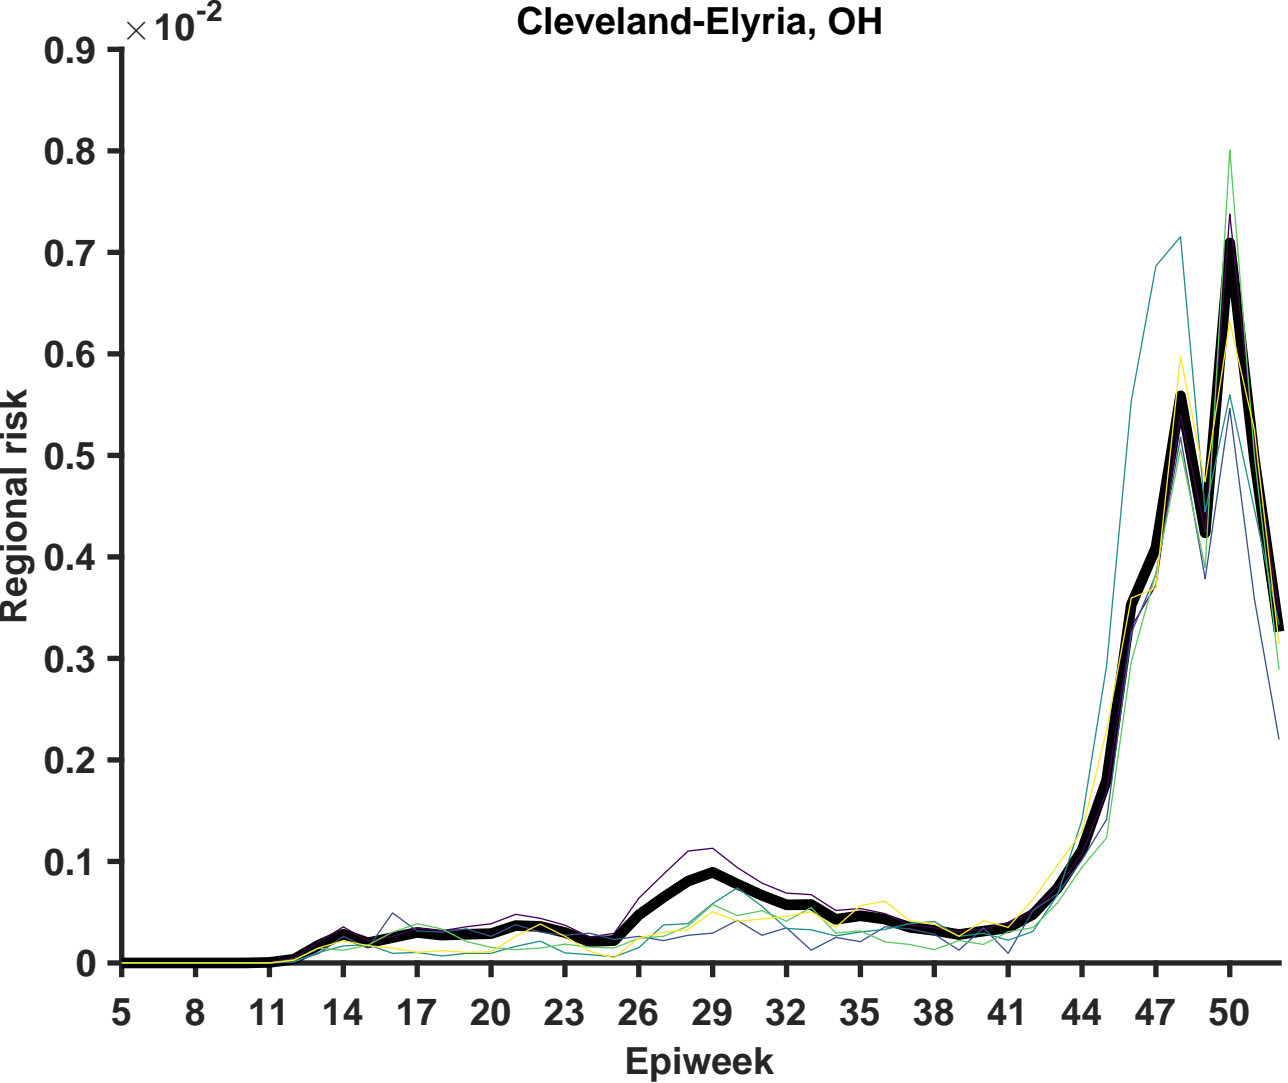

# San Jose-Sunnyvale-Santa Clara, CA

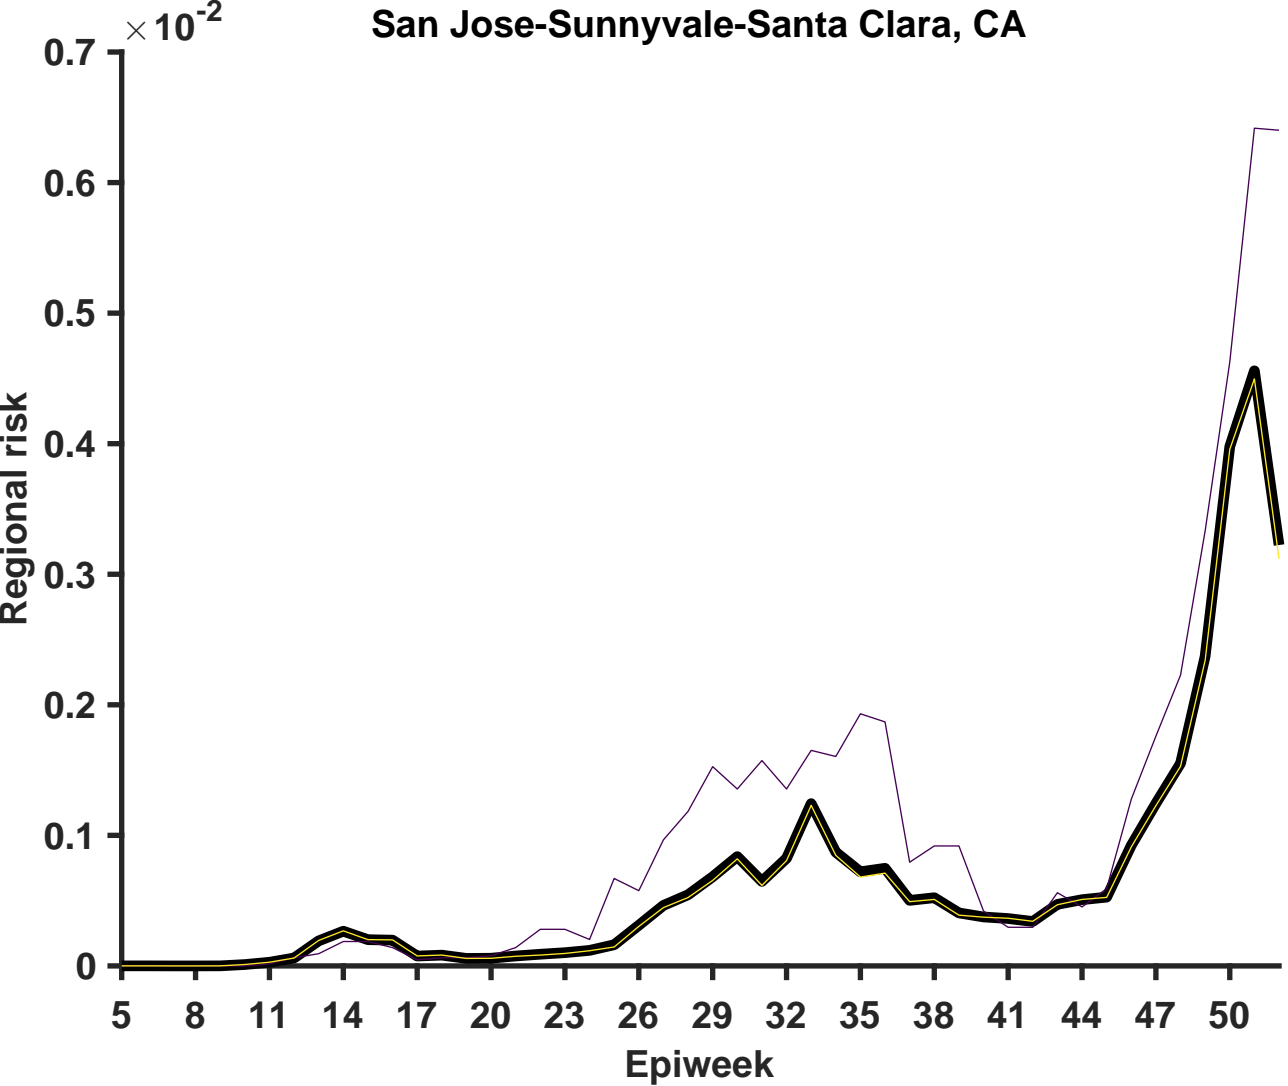

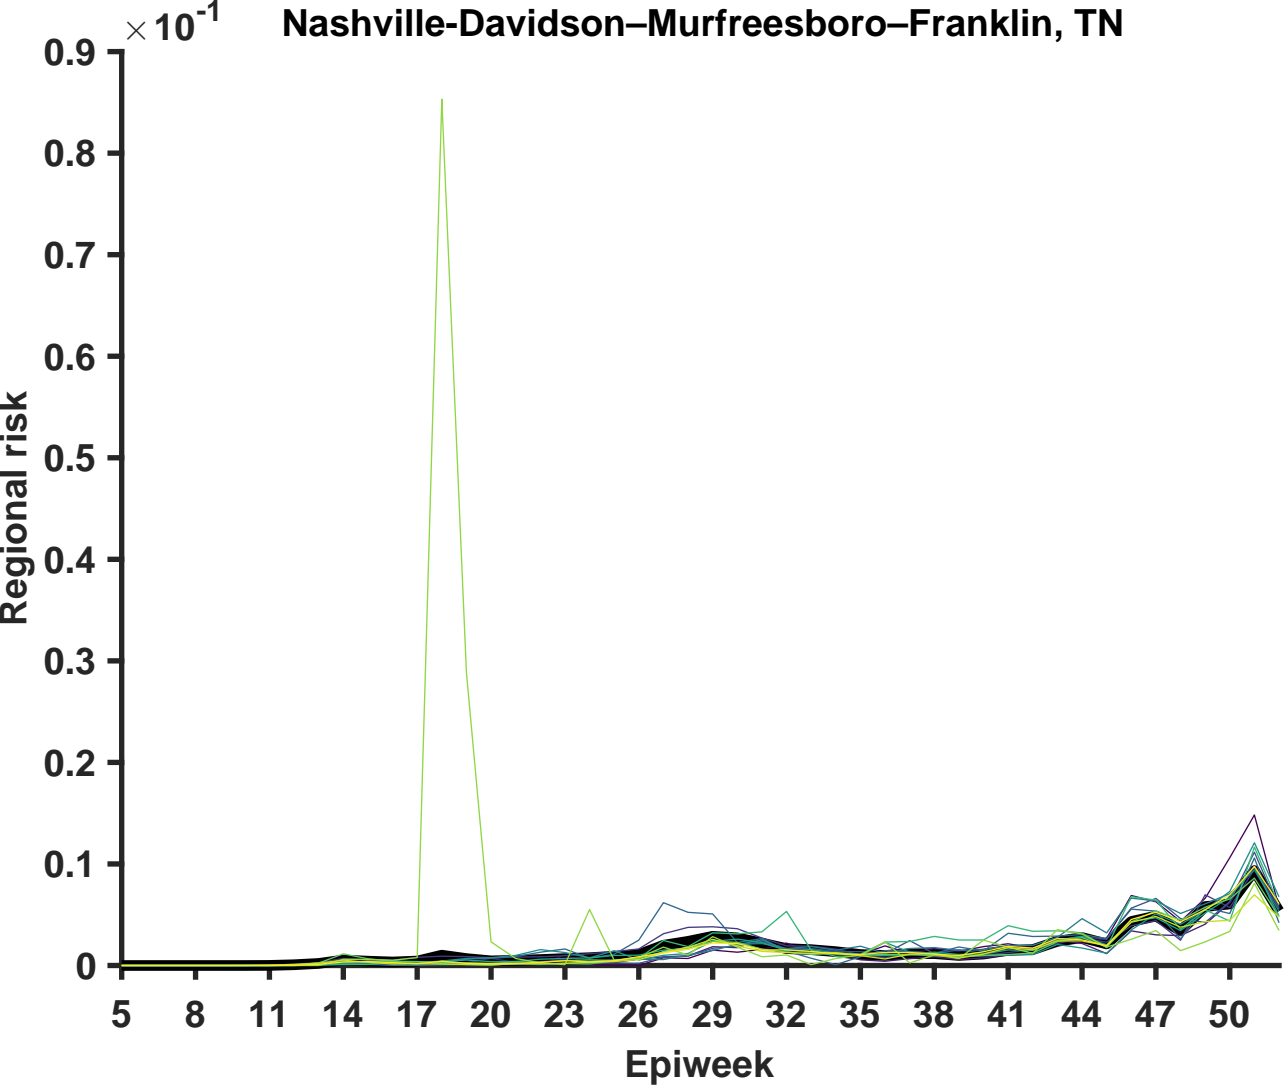

# Providence-Warwick, RI-MA

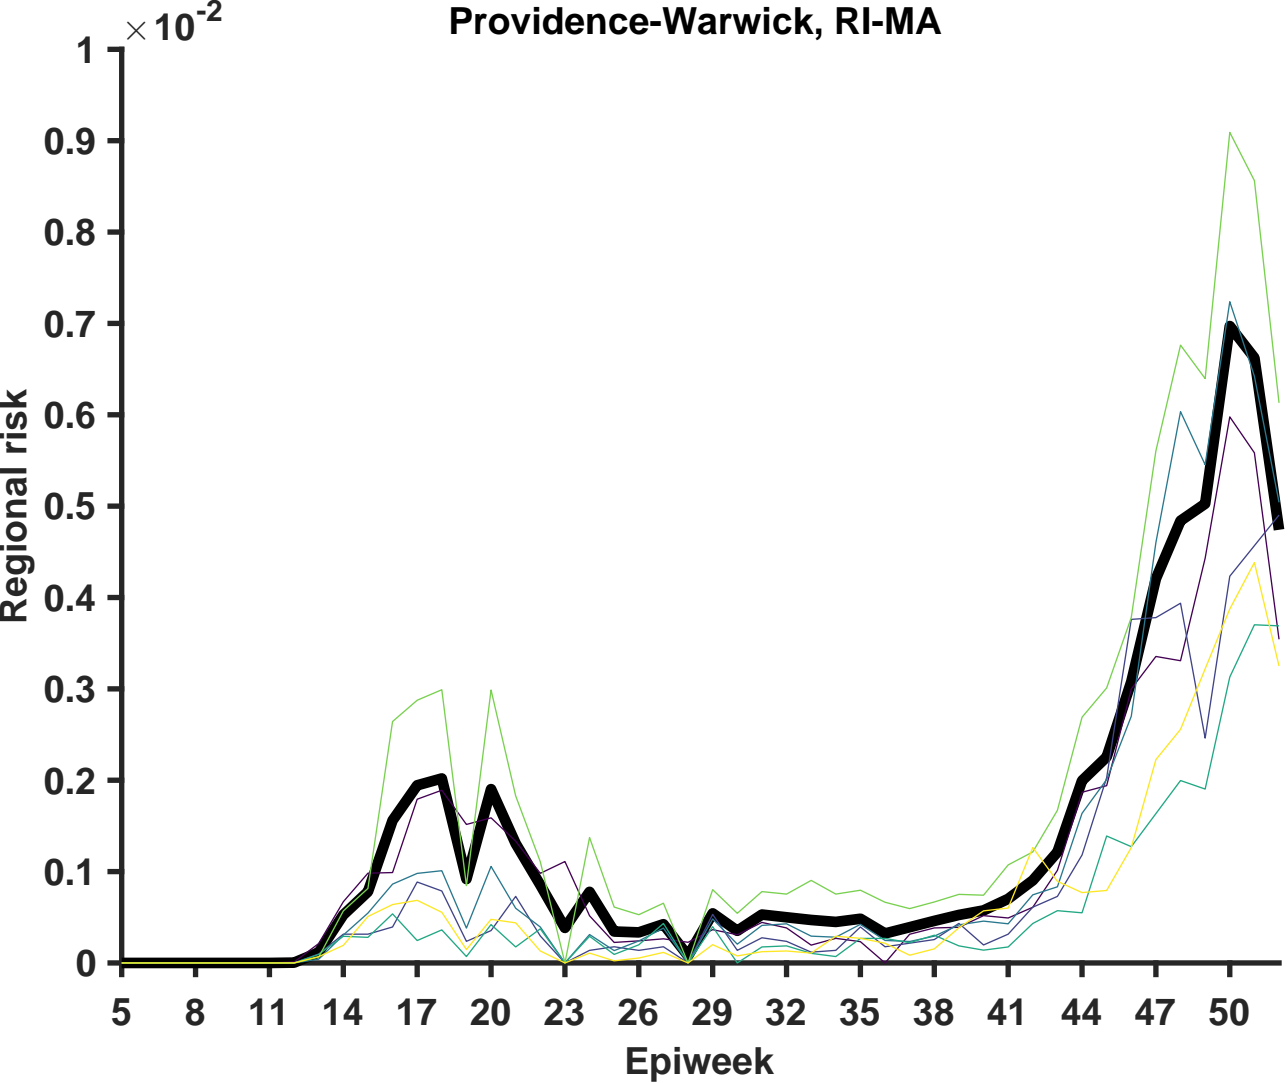



# Jacksonville, FL

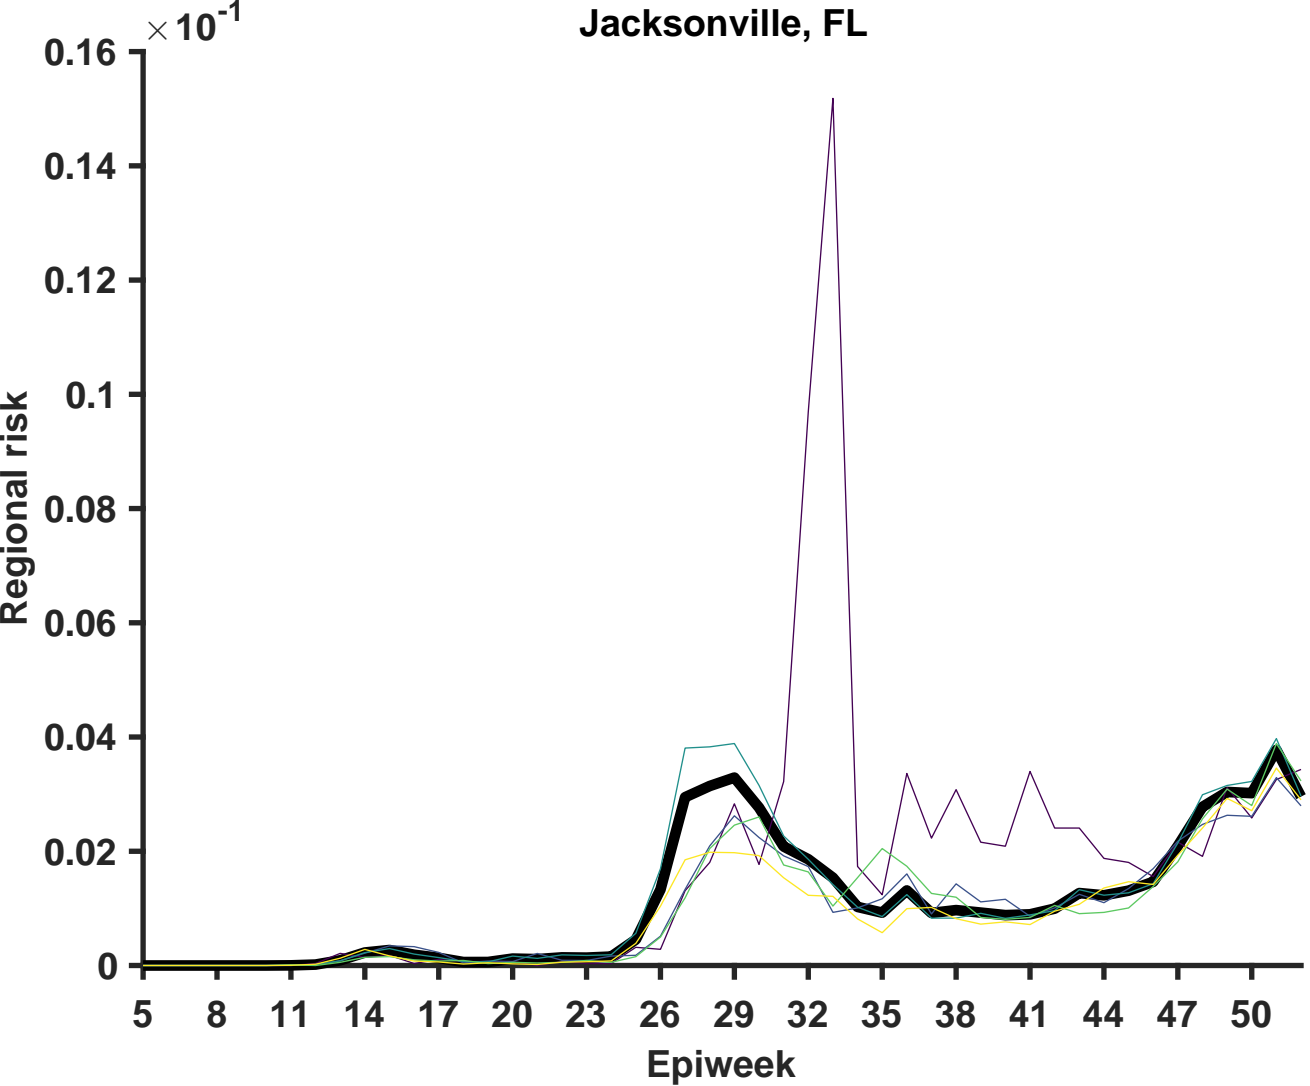

# Milwaukee-Waukesha, WI

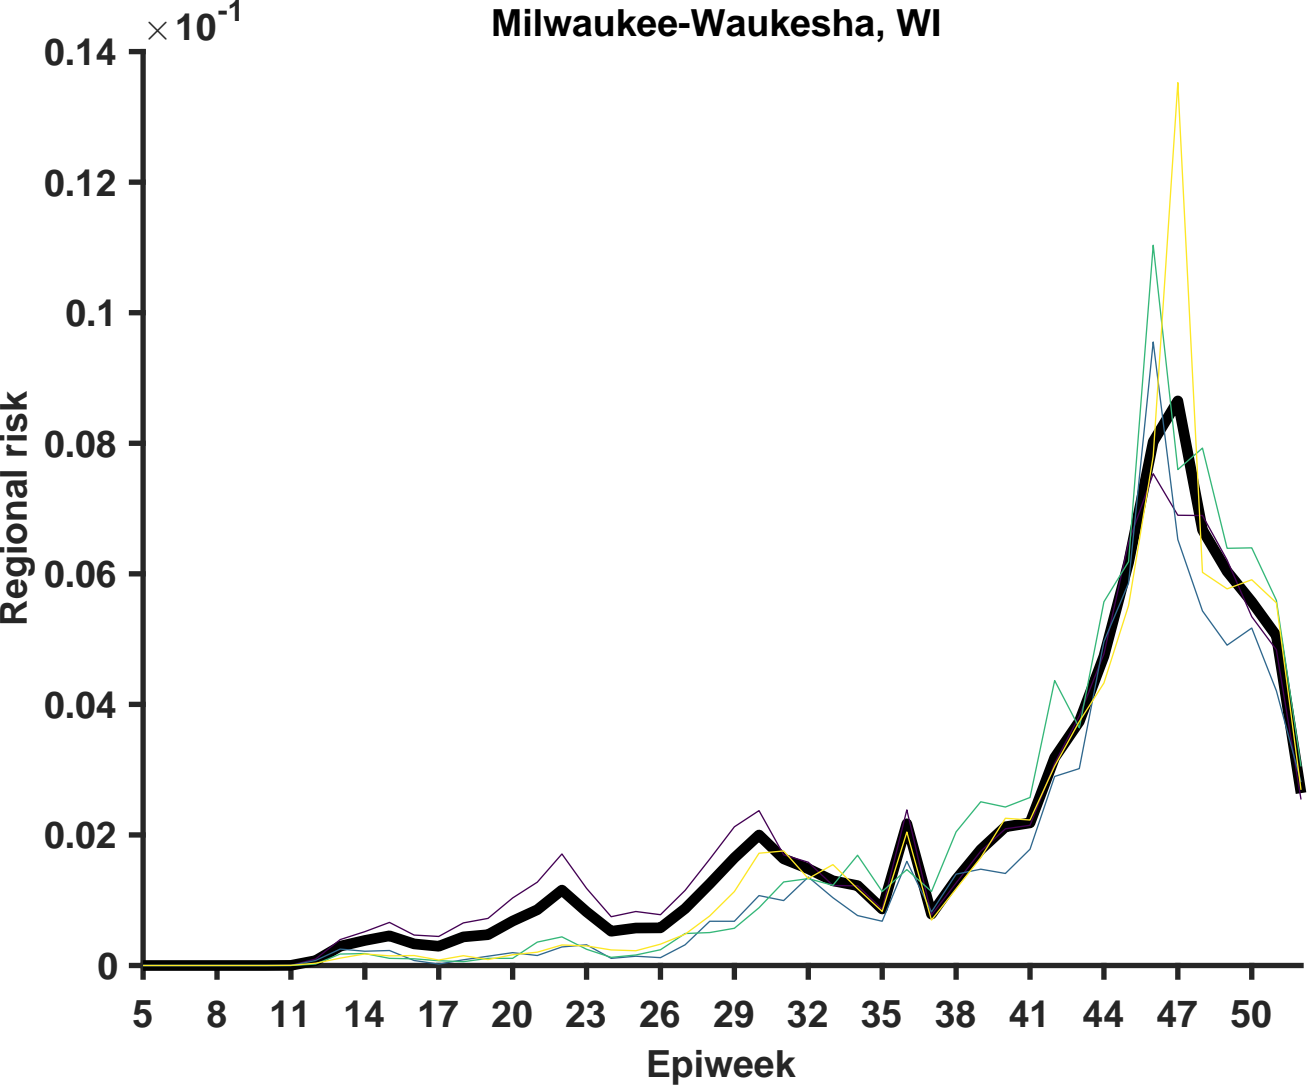

# Oklahoma City, OK

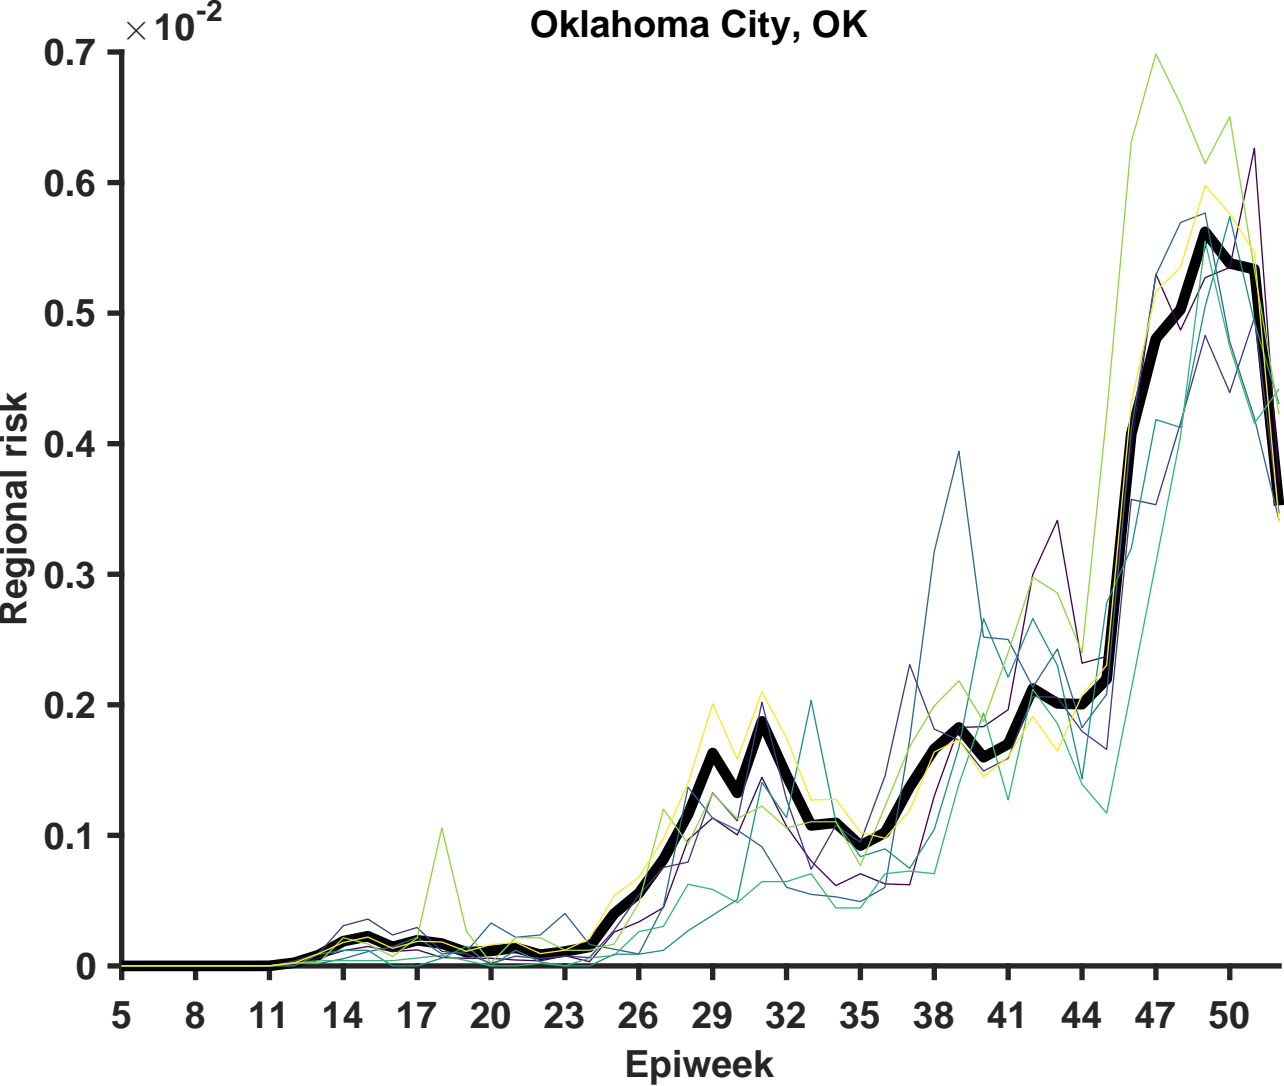

# Raleigh-Cary, NC

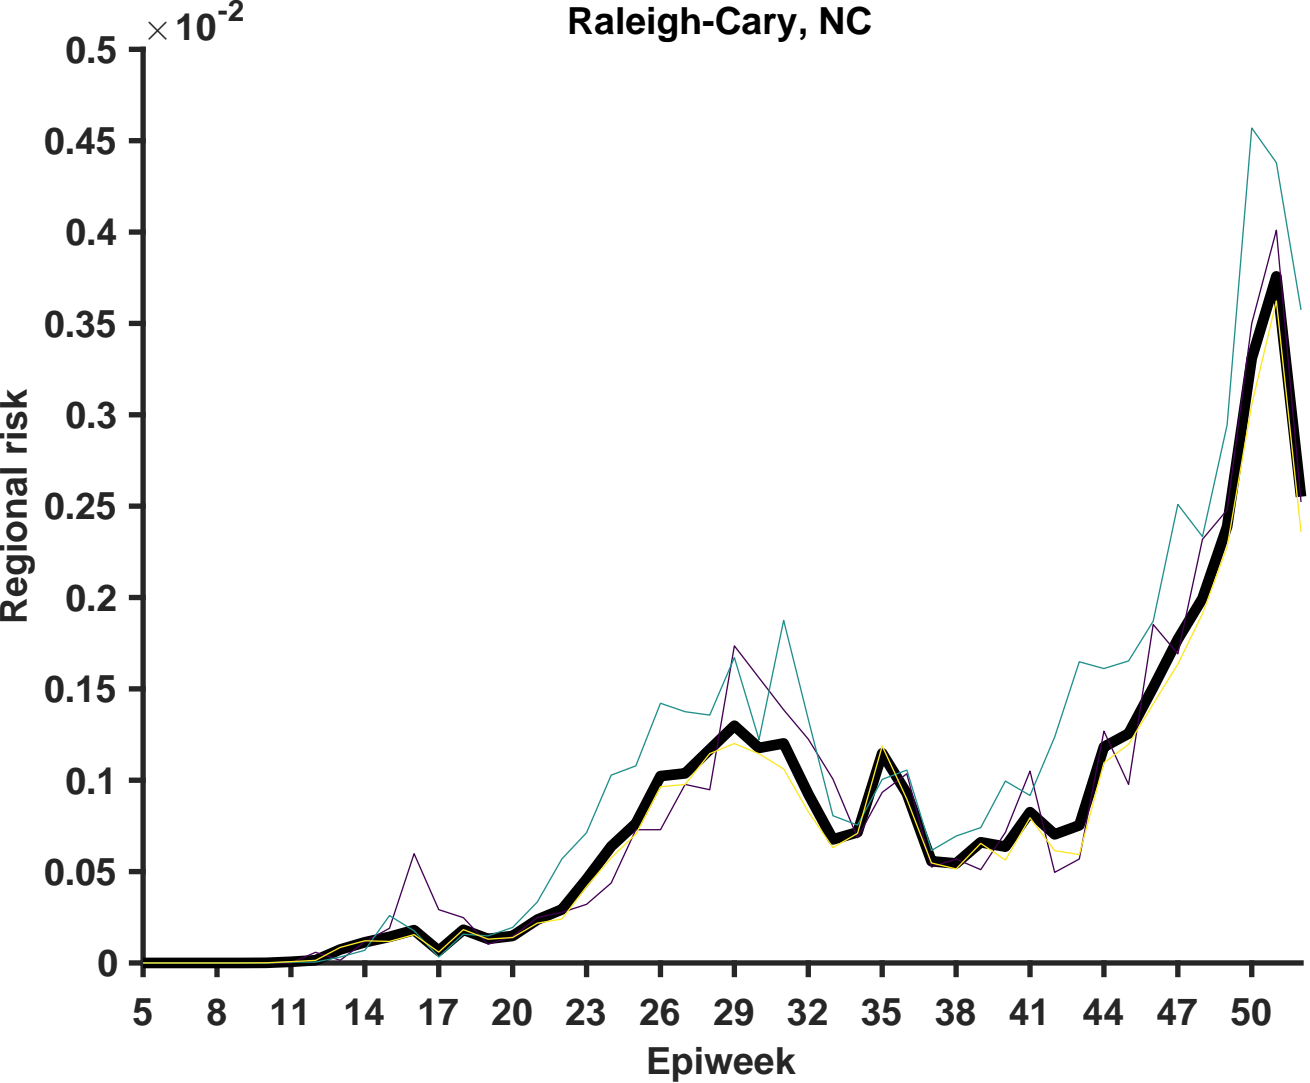

# Louisville/Jefferson County, KY-IN

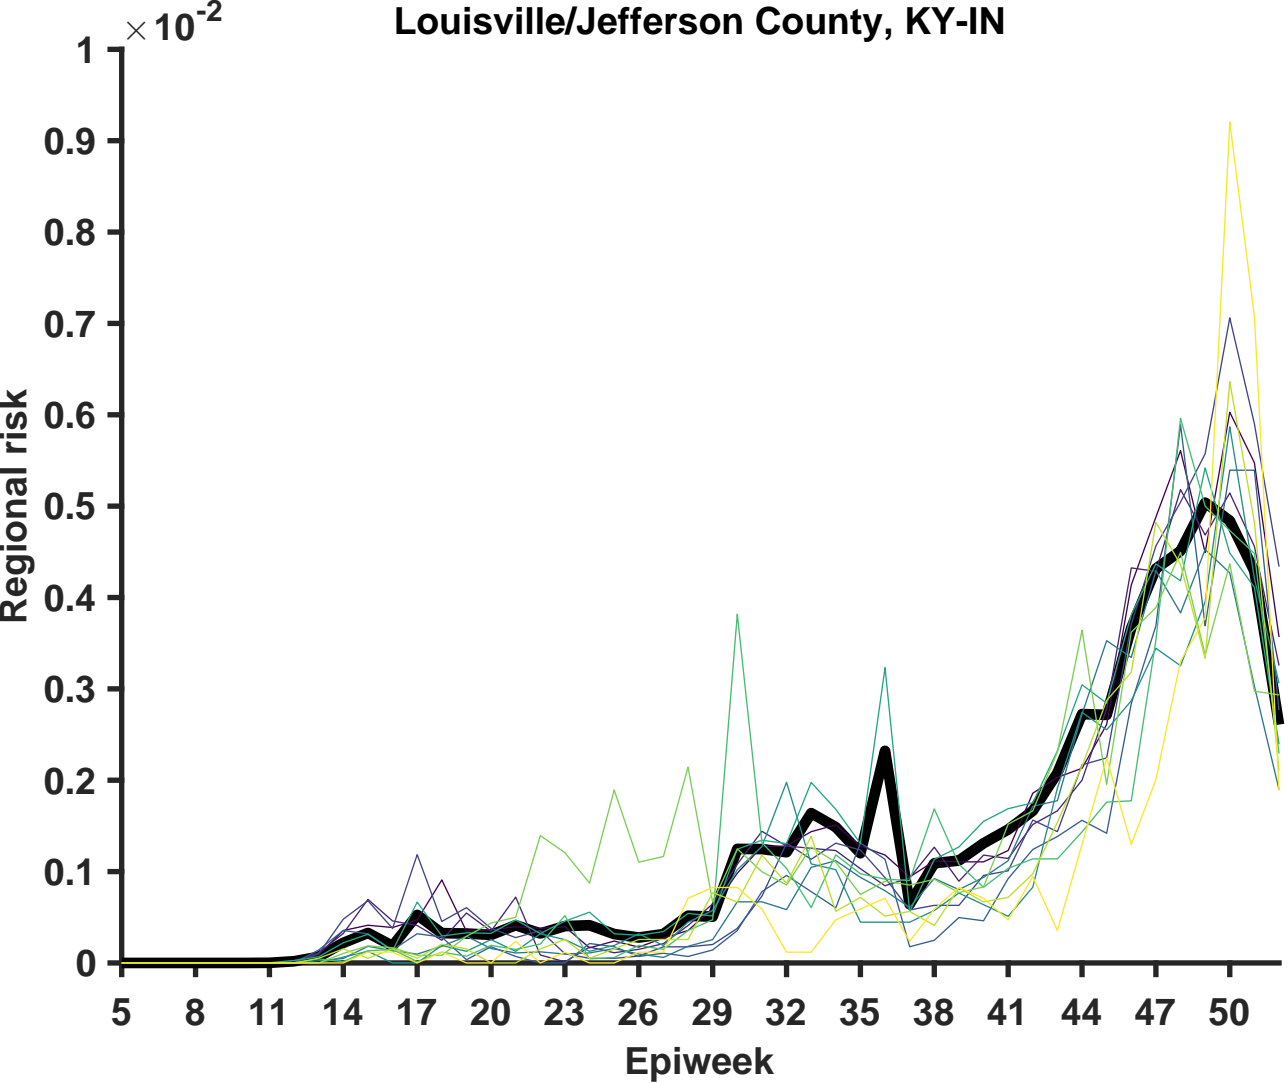

# Memphis, TN-MS-AR

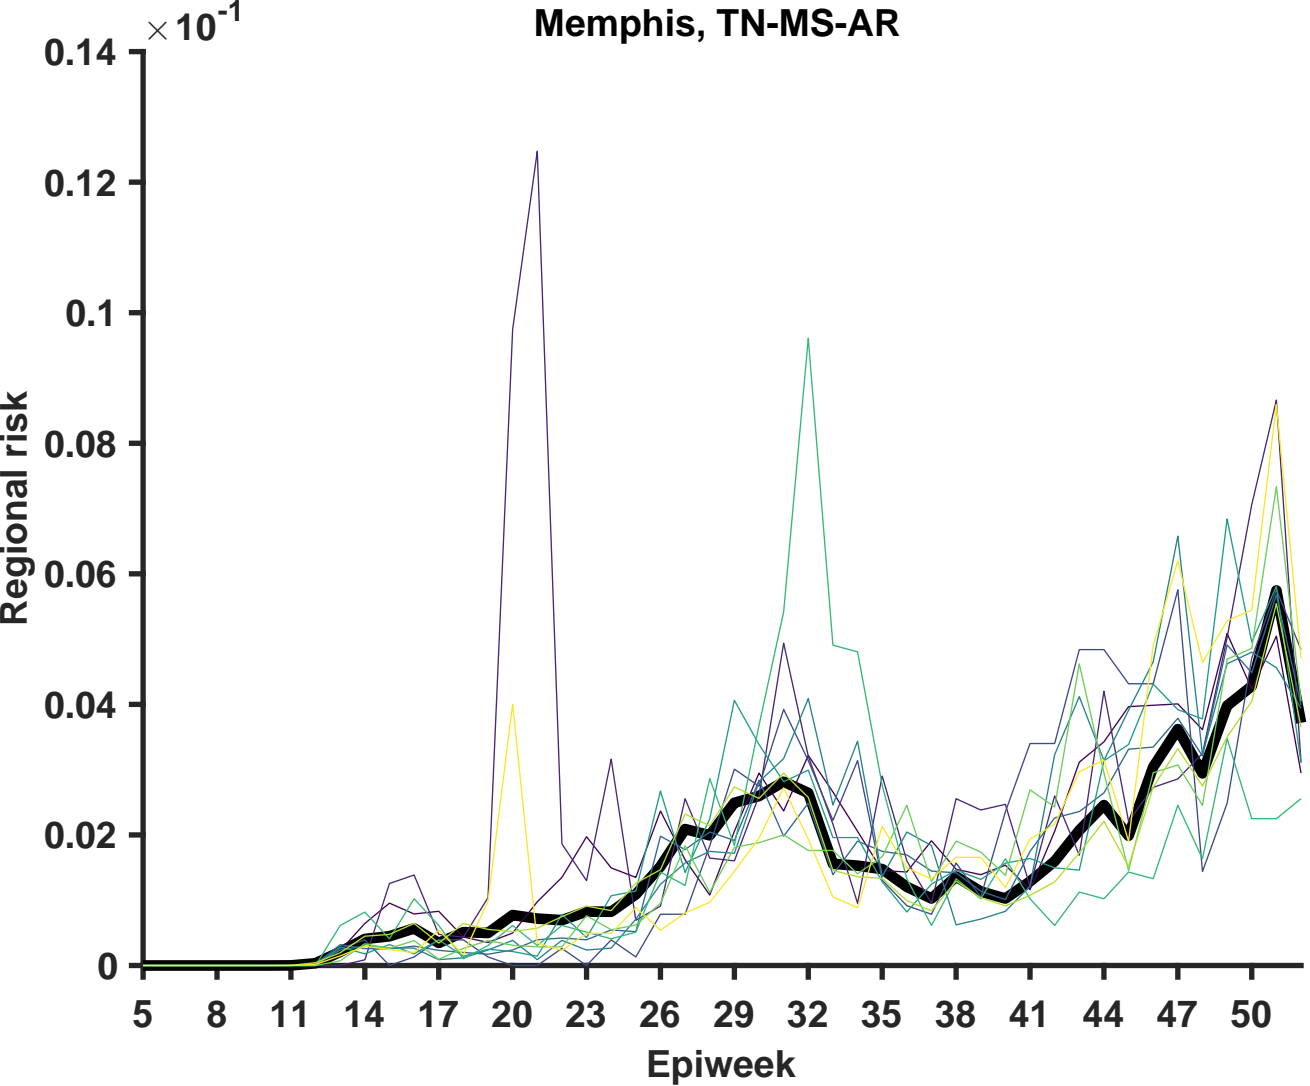

# Richmond, VA

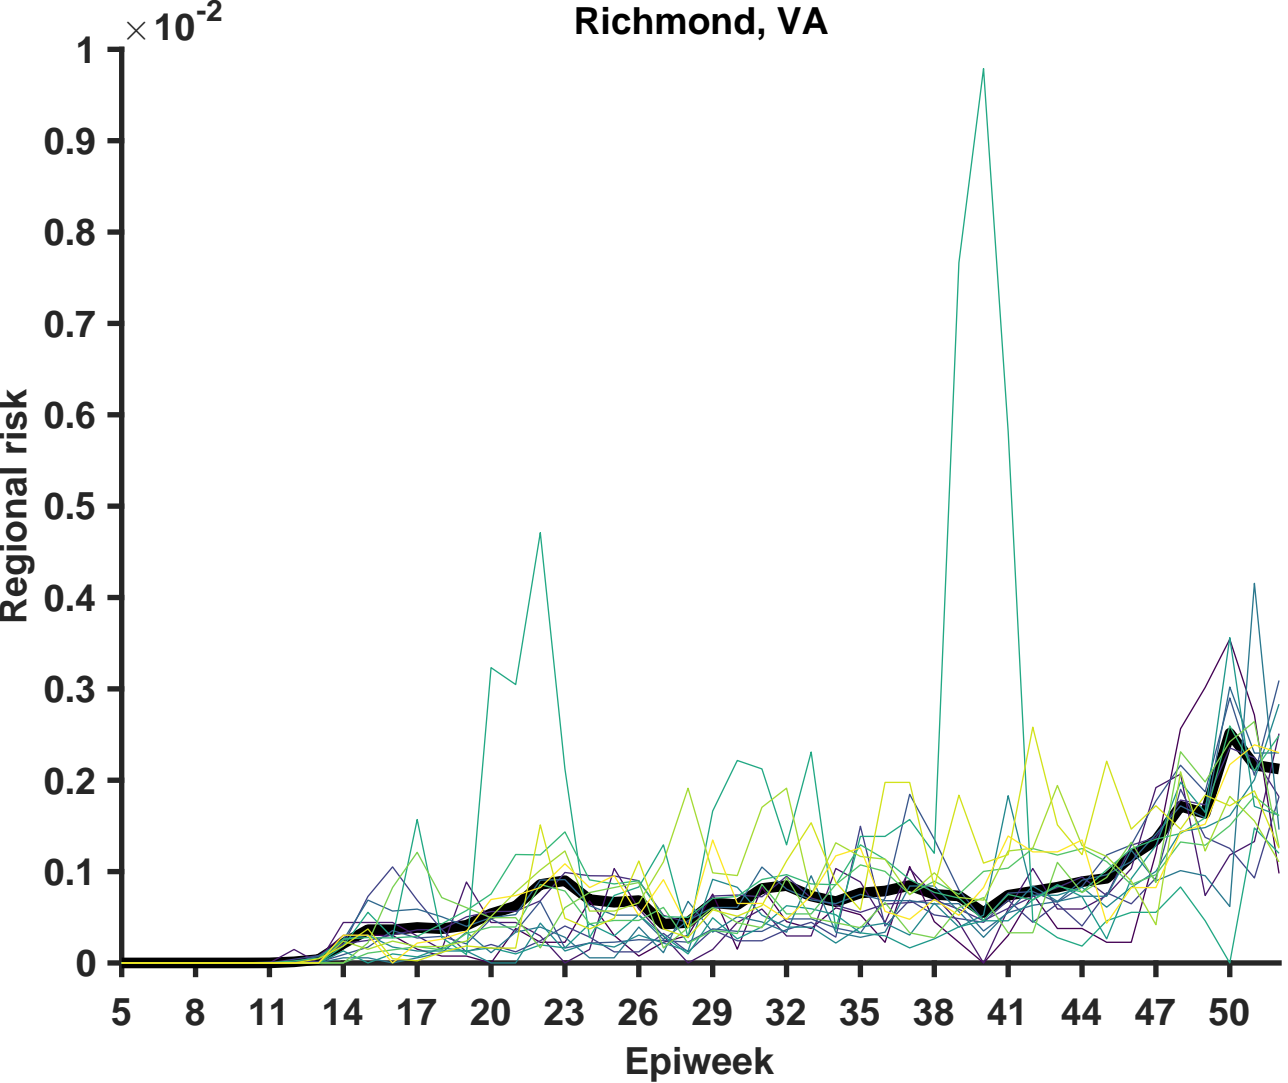

# New Orleans-Metairie, LA

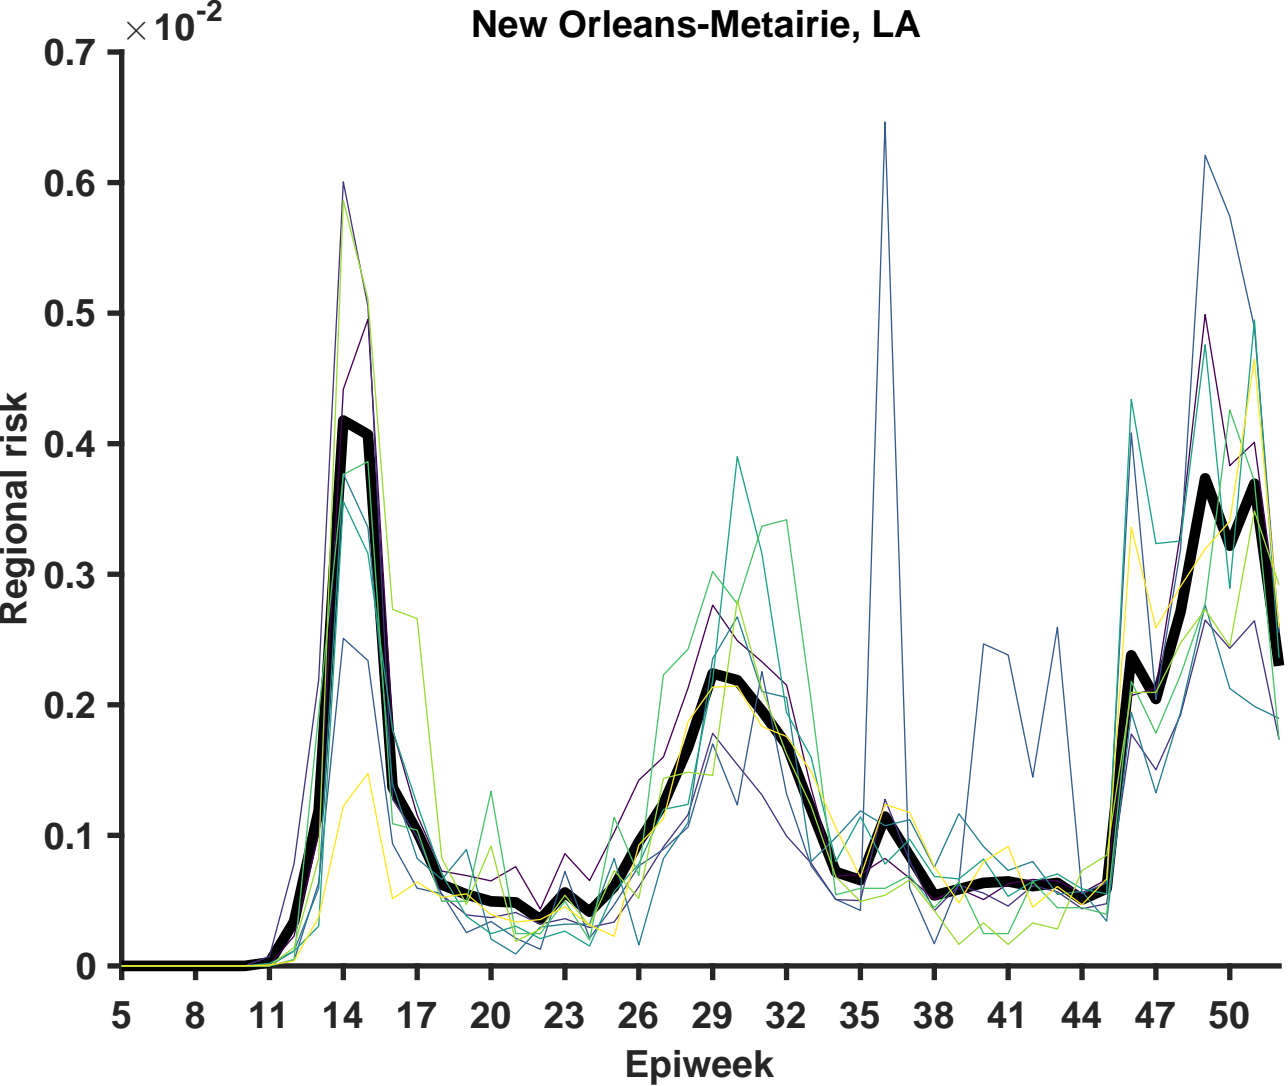



# Salt Lake City, UT

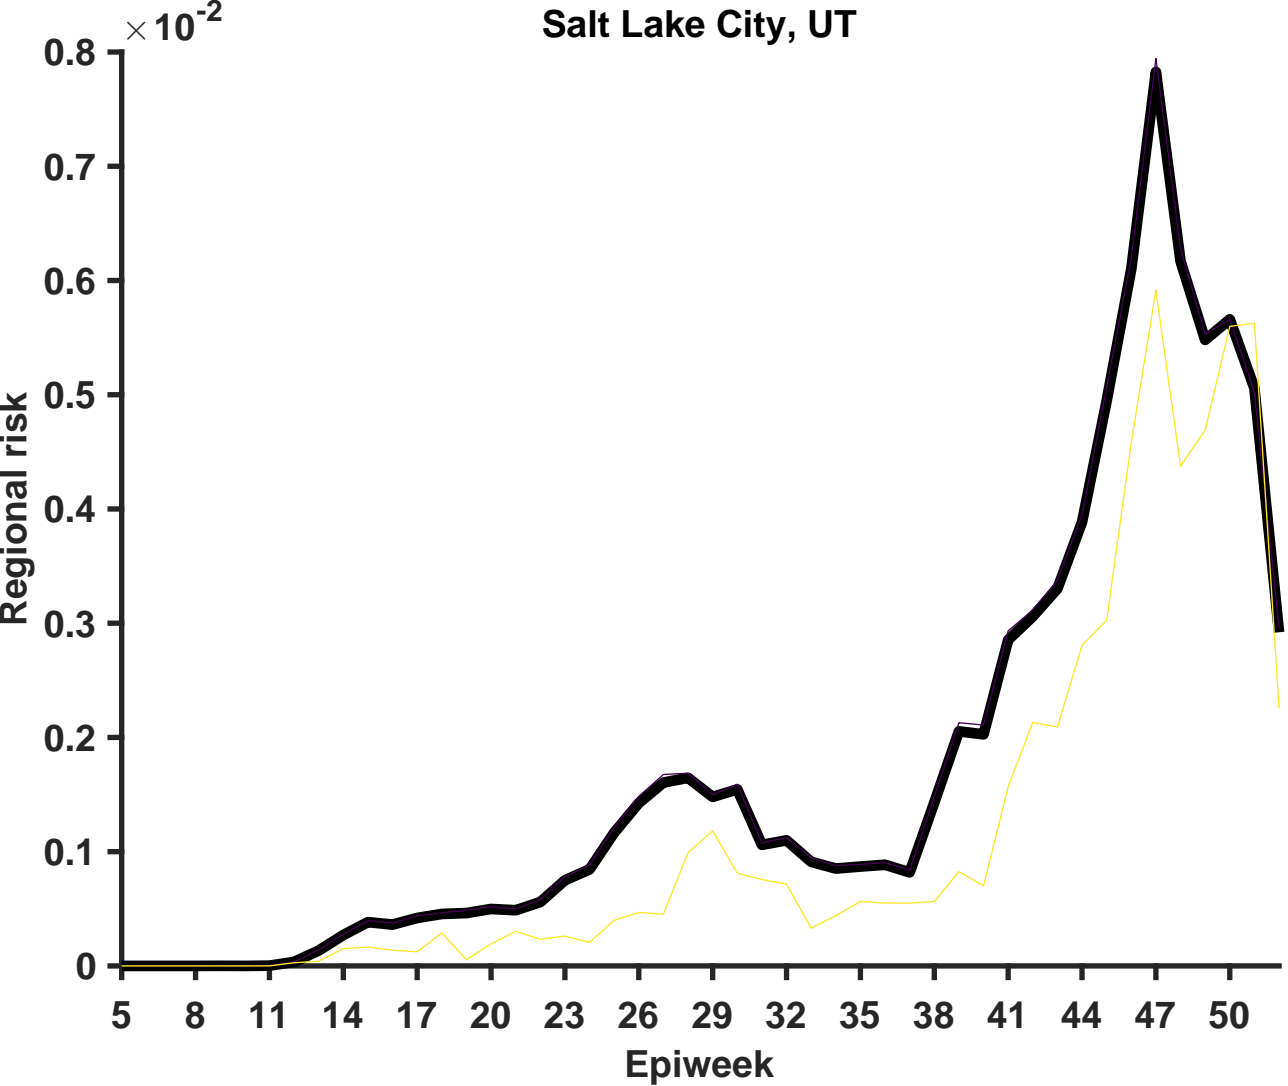

# Hartford-East Hartford-Middletown, CT

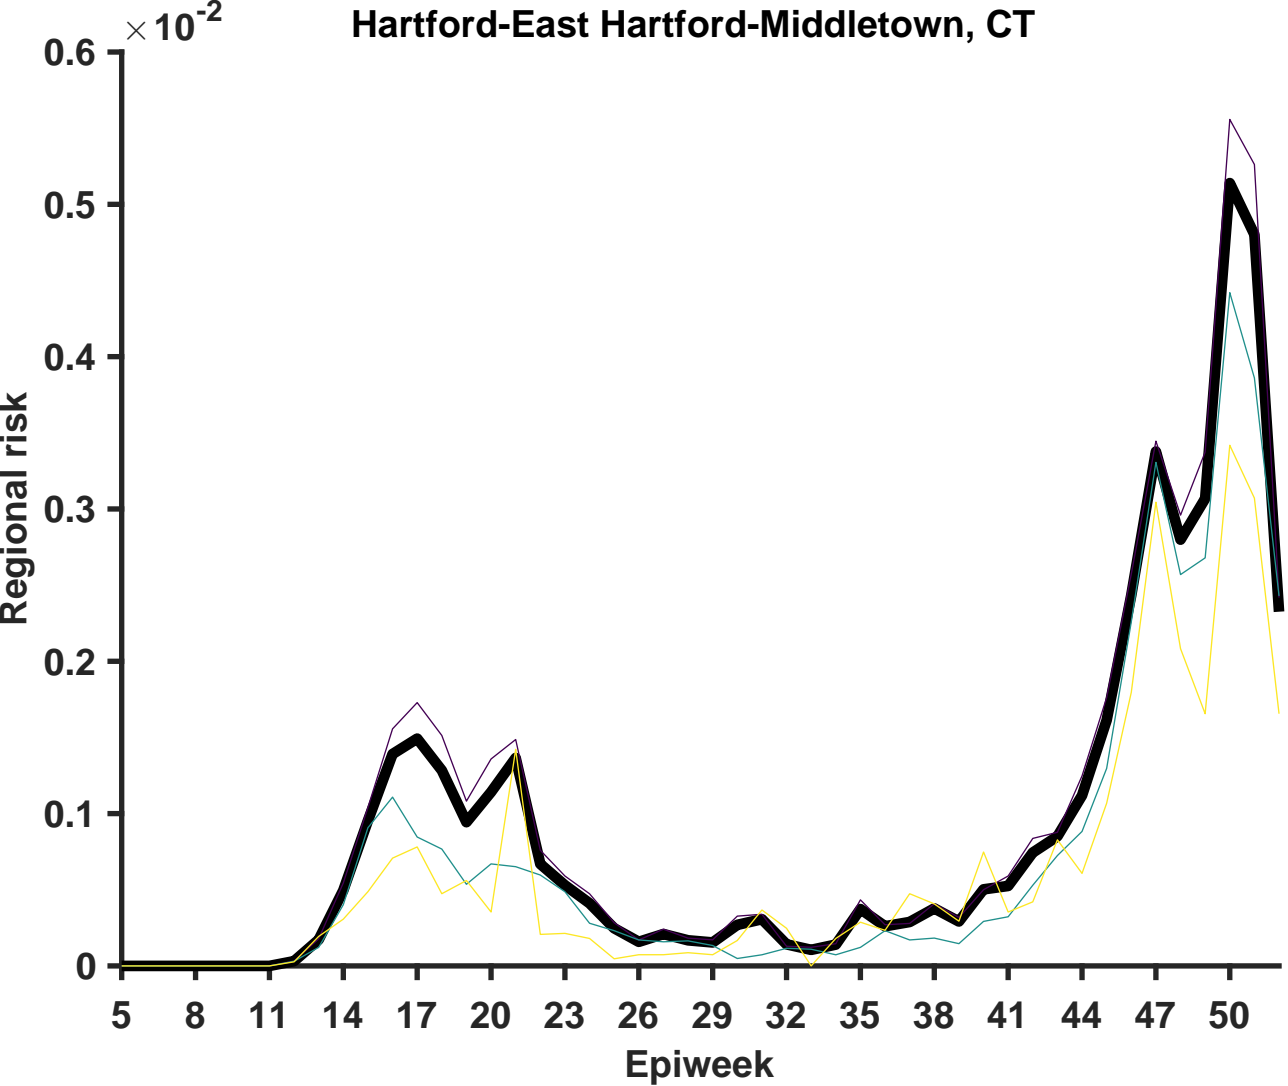

# Buffalo-Niagara Falls, NY

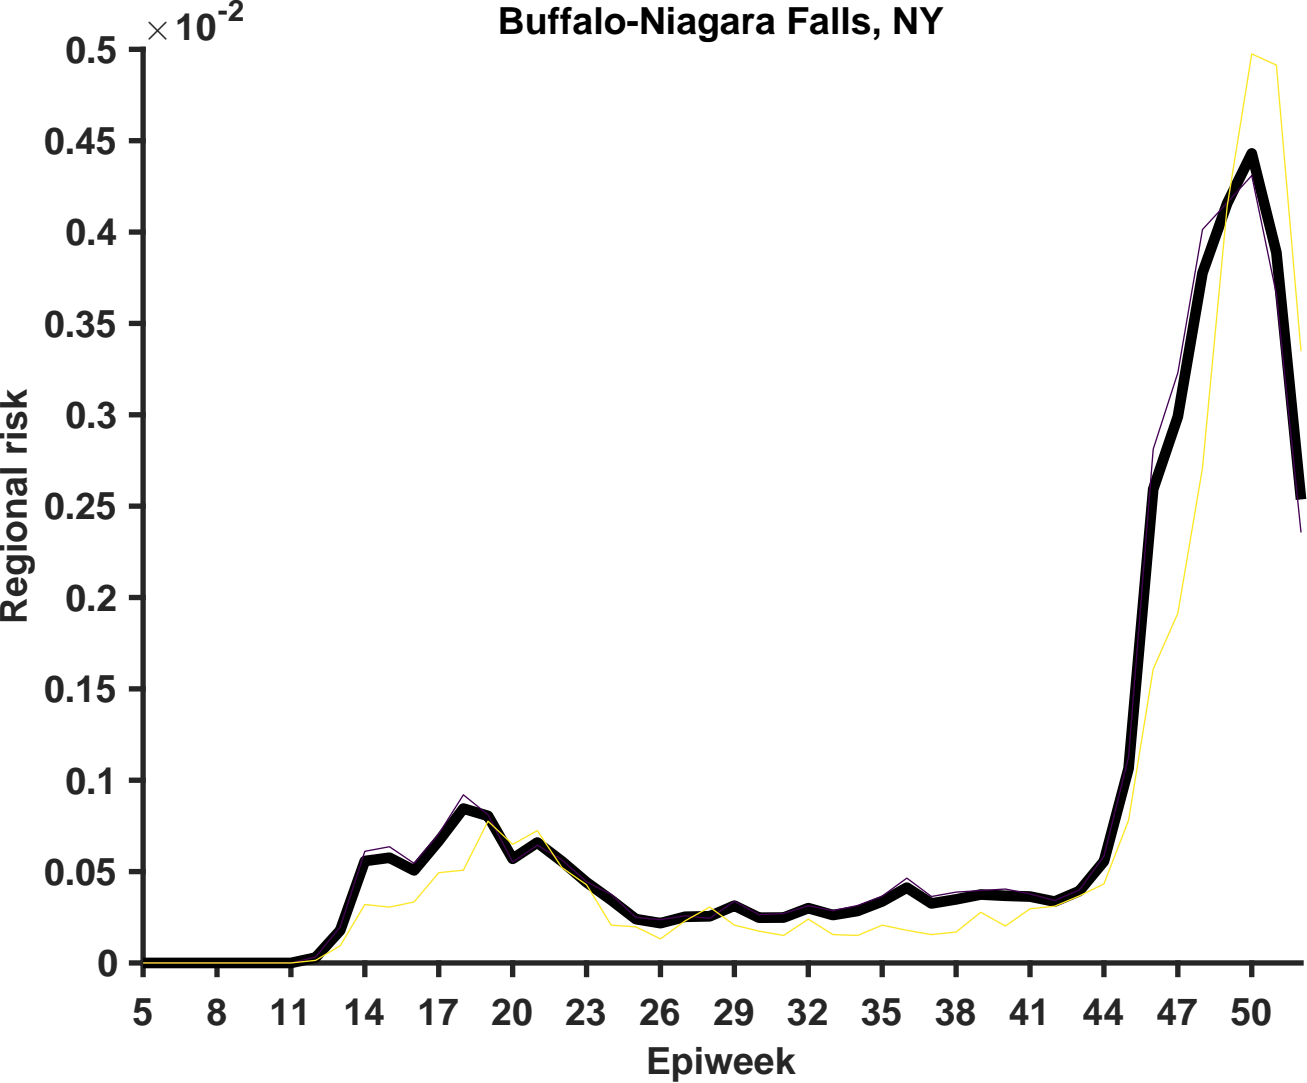

# Birmingham-Hoover, AL

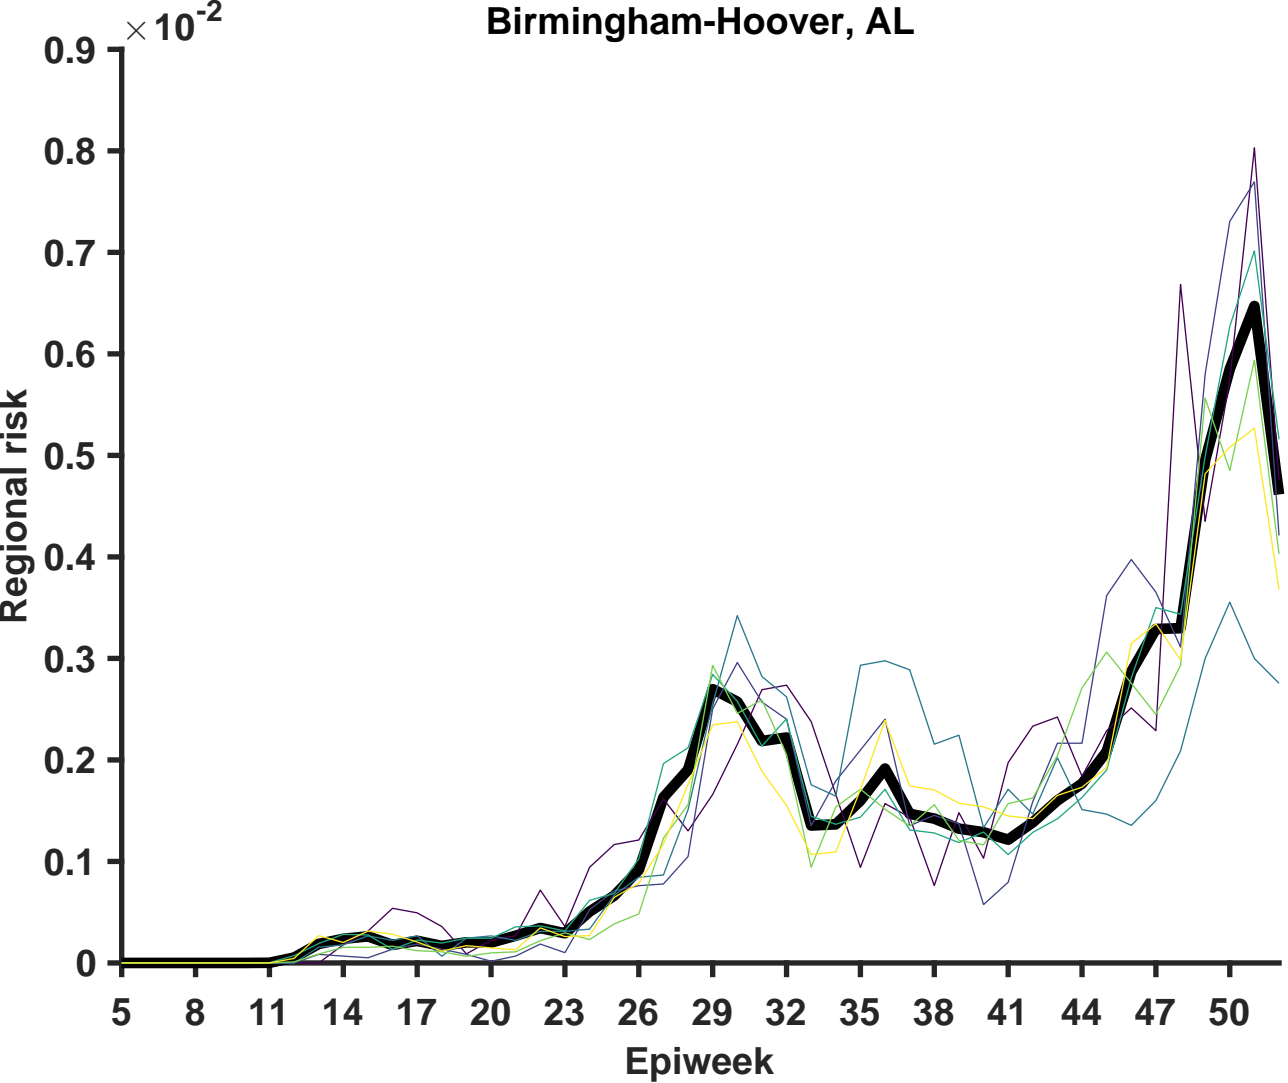

# Rochester, NY

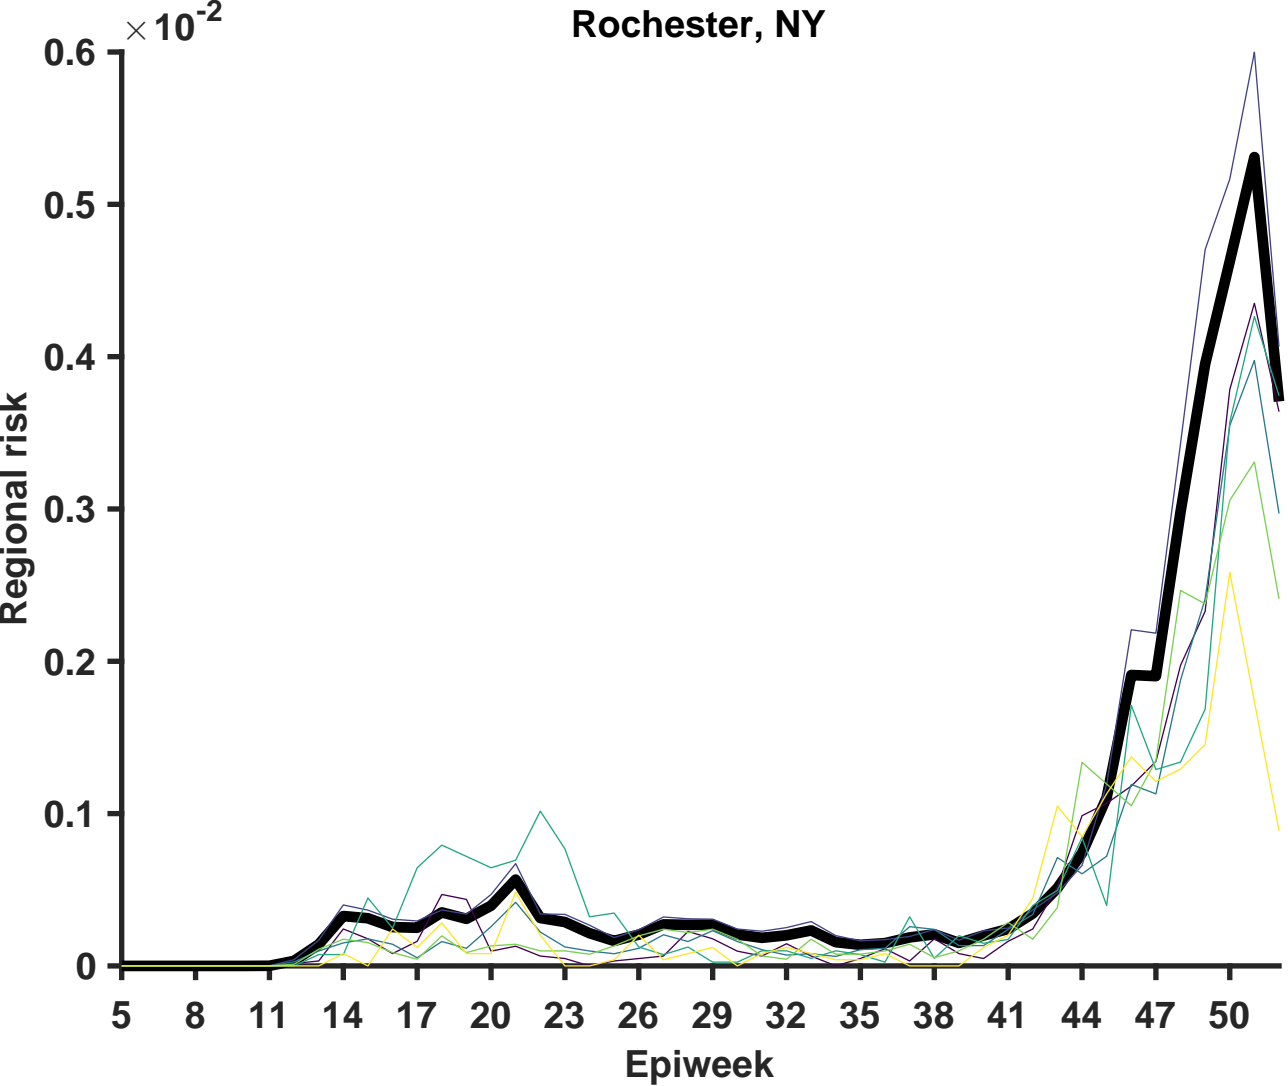

# Grand Rapids-Kentwood, MI

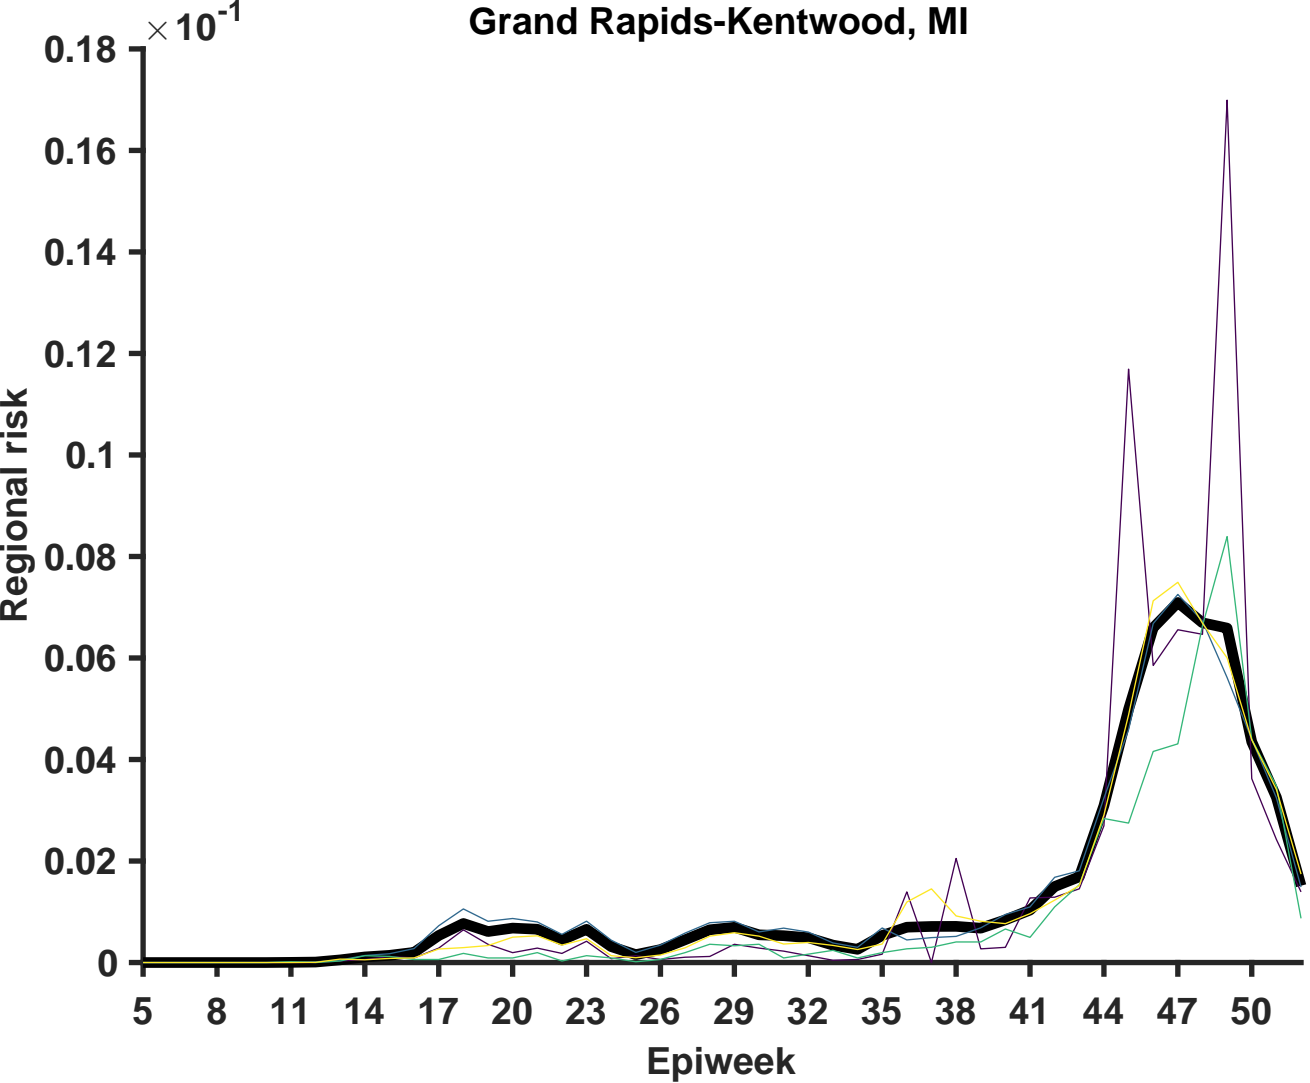

# Tulsa, OK

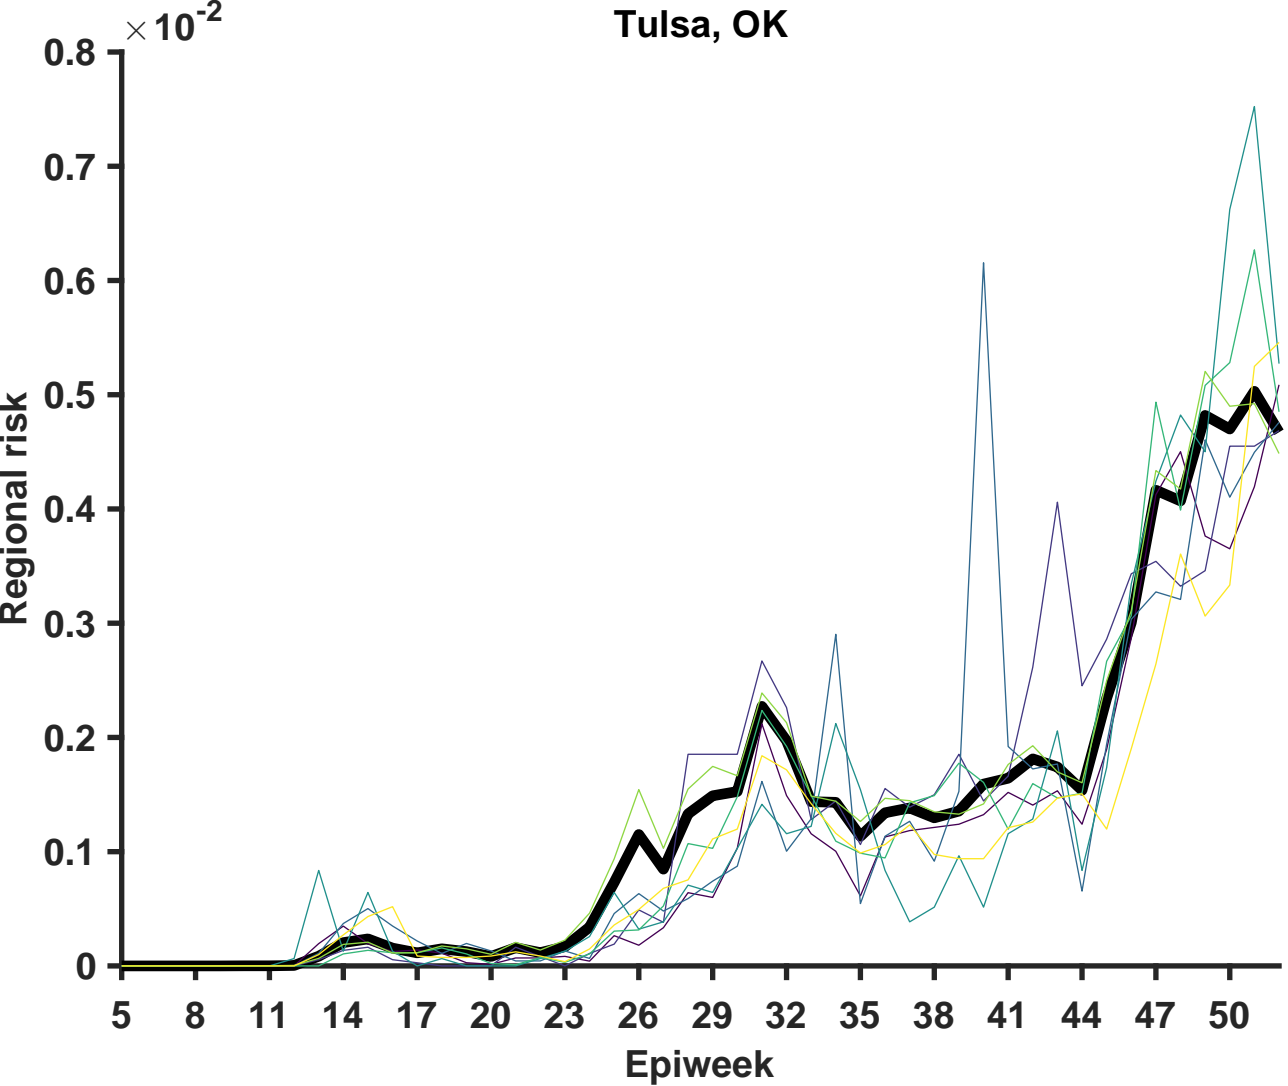

# Worcester, MA-CT

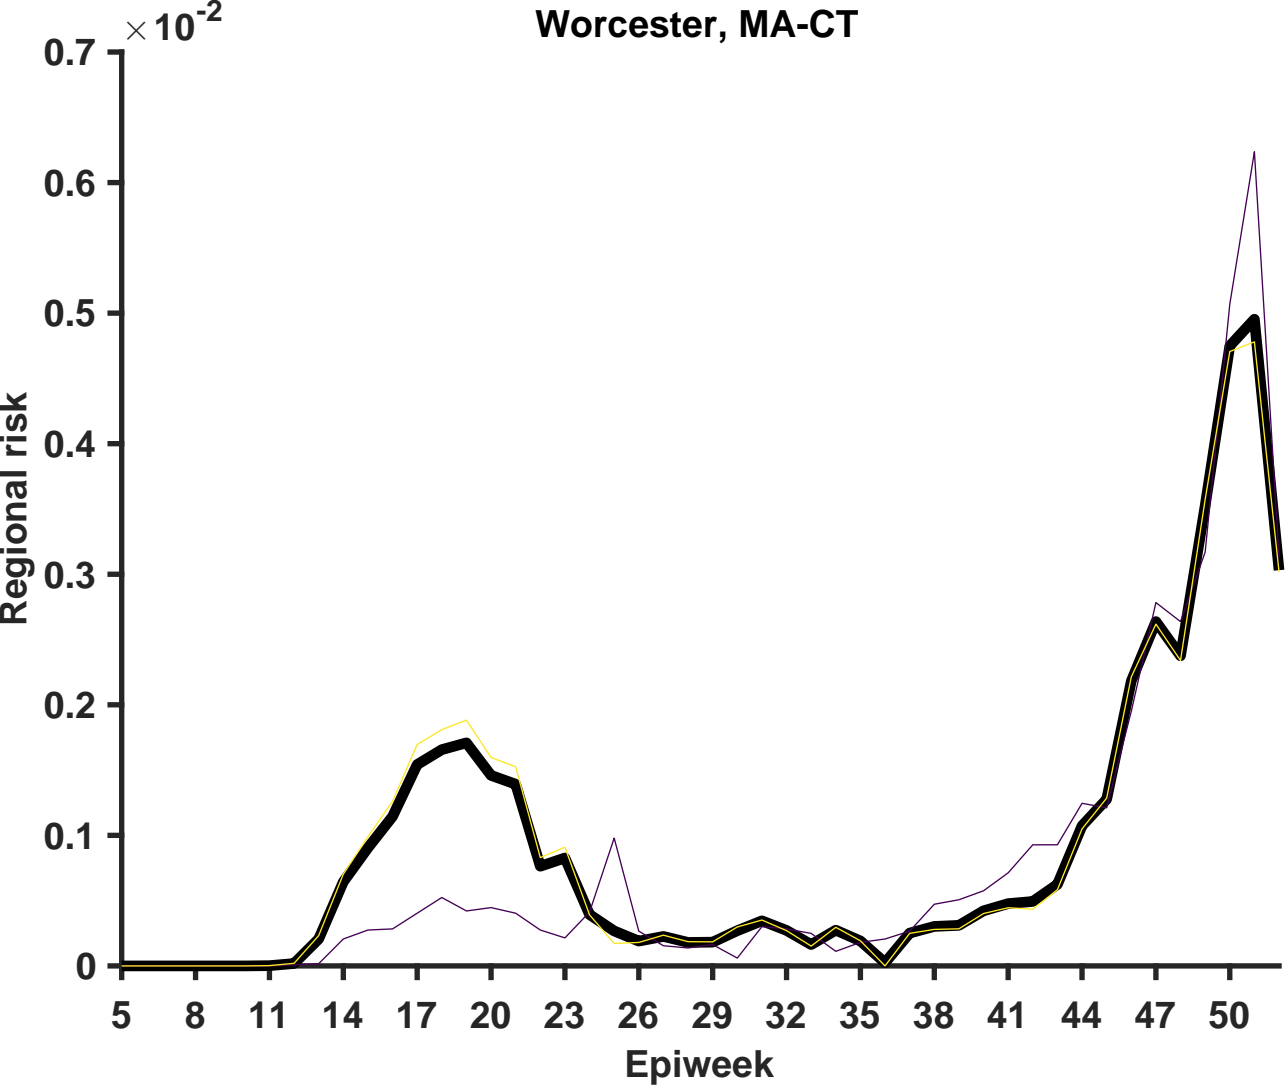



# Omaha-Council Bluffs, NE-IA

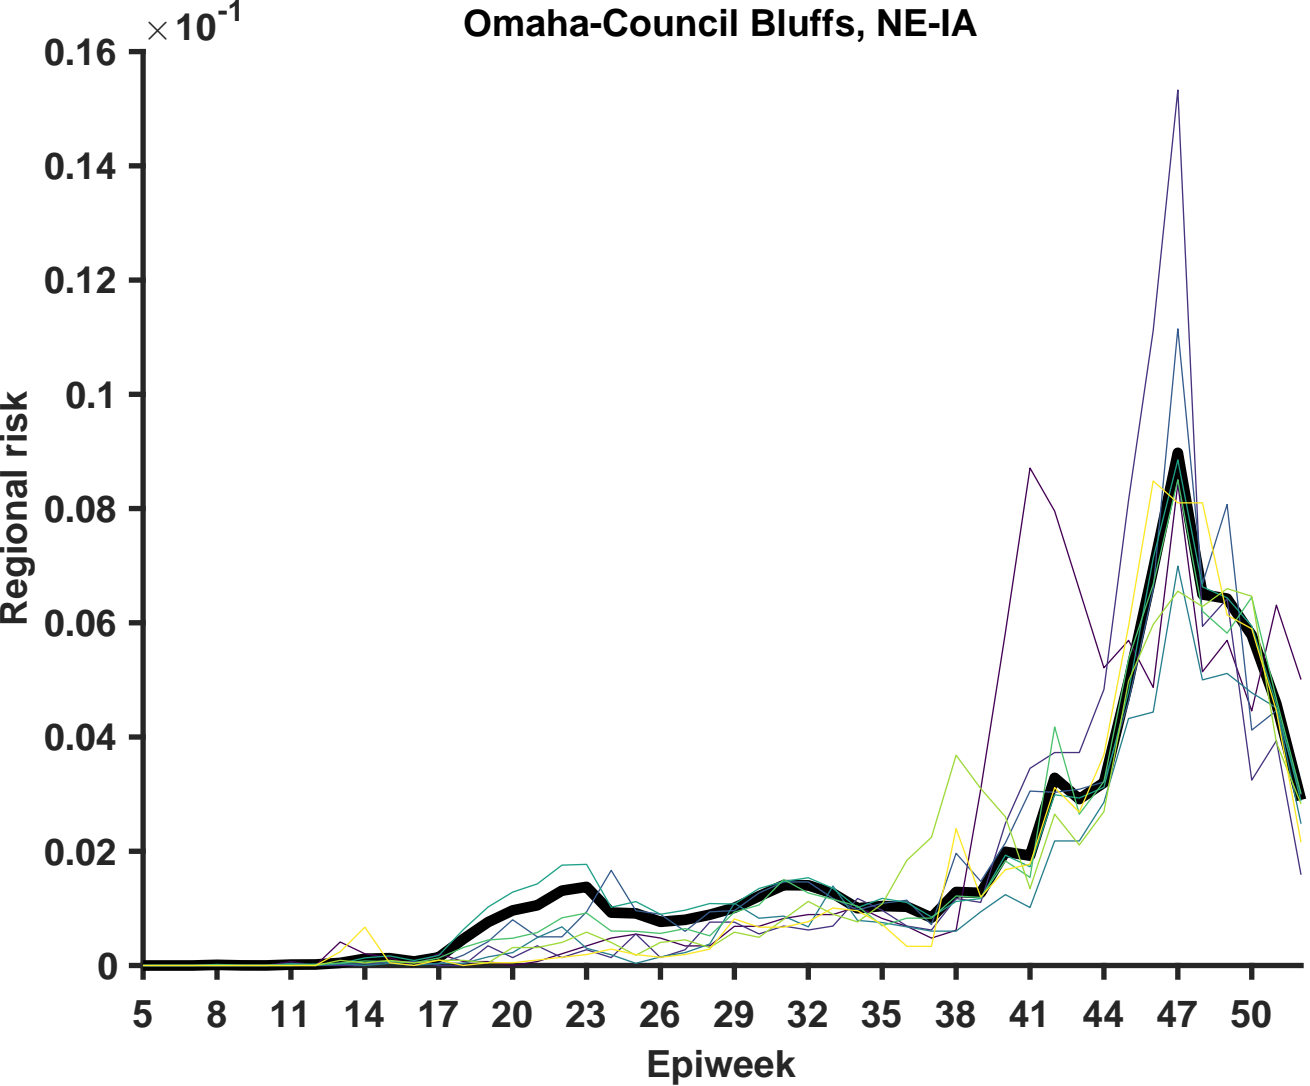

# Greenville-Anderson, SC

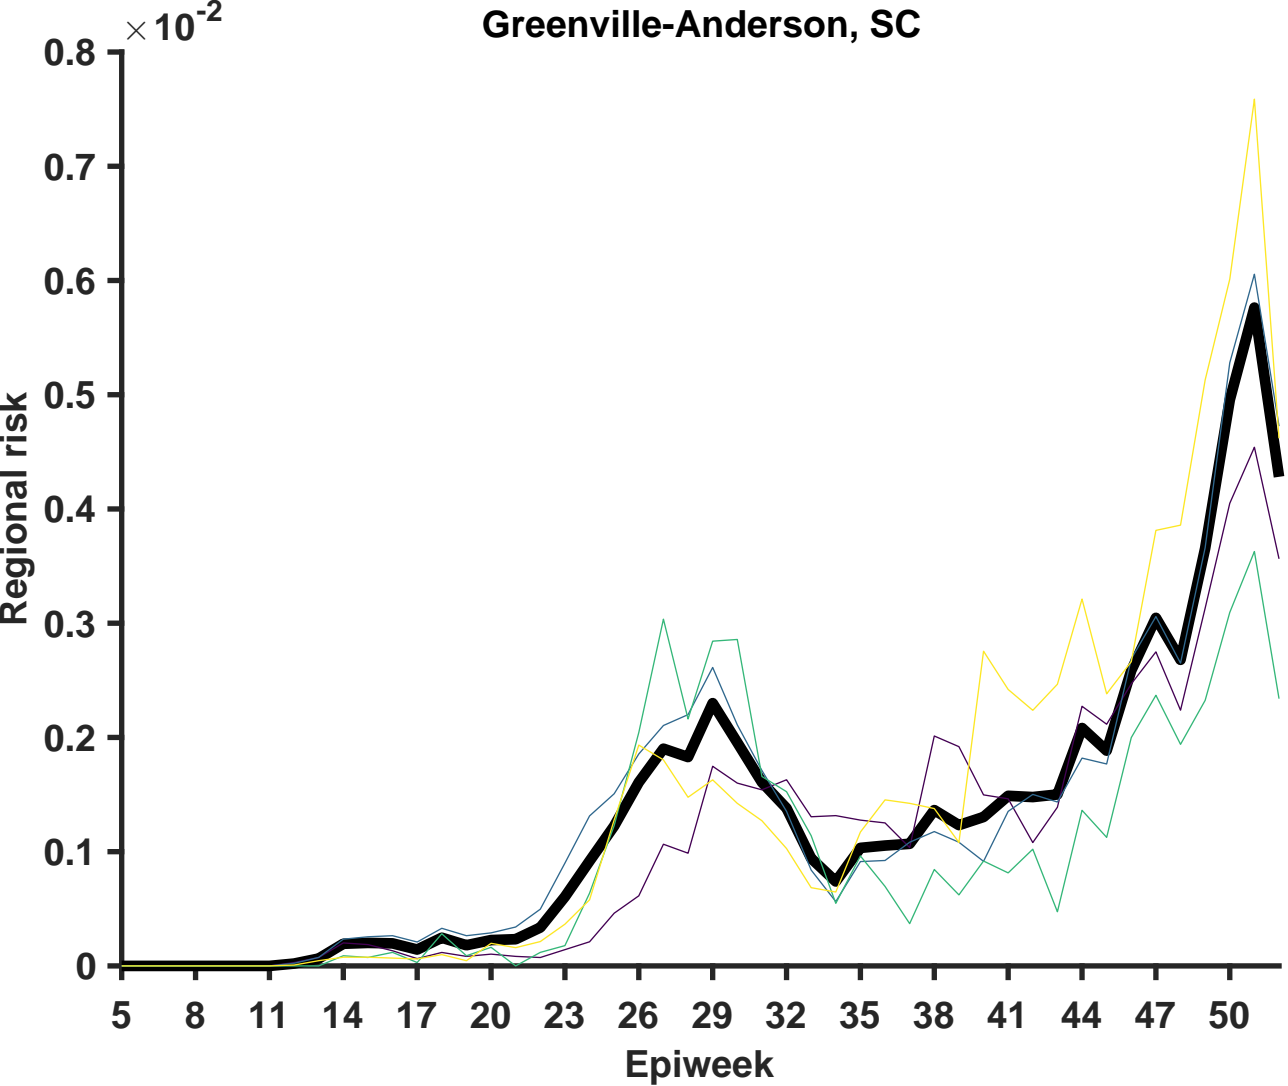

# Albuquerque, NM

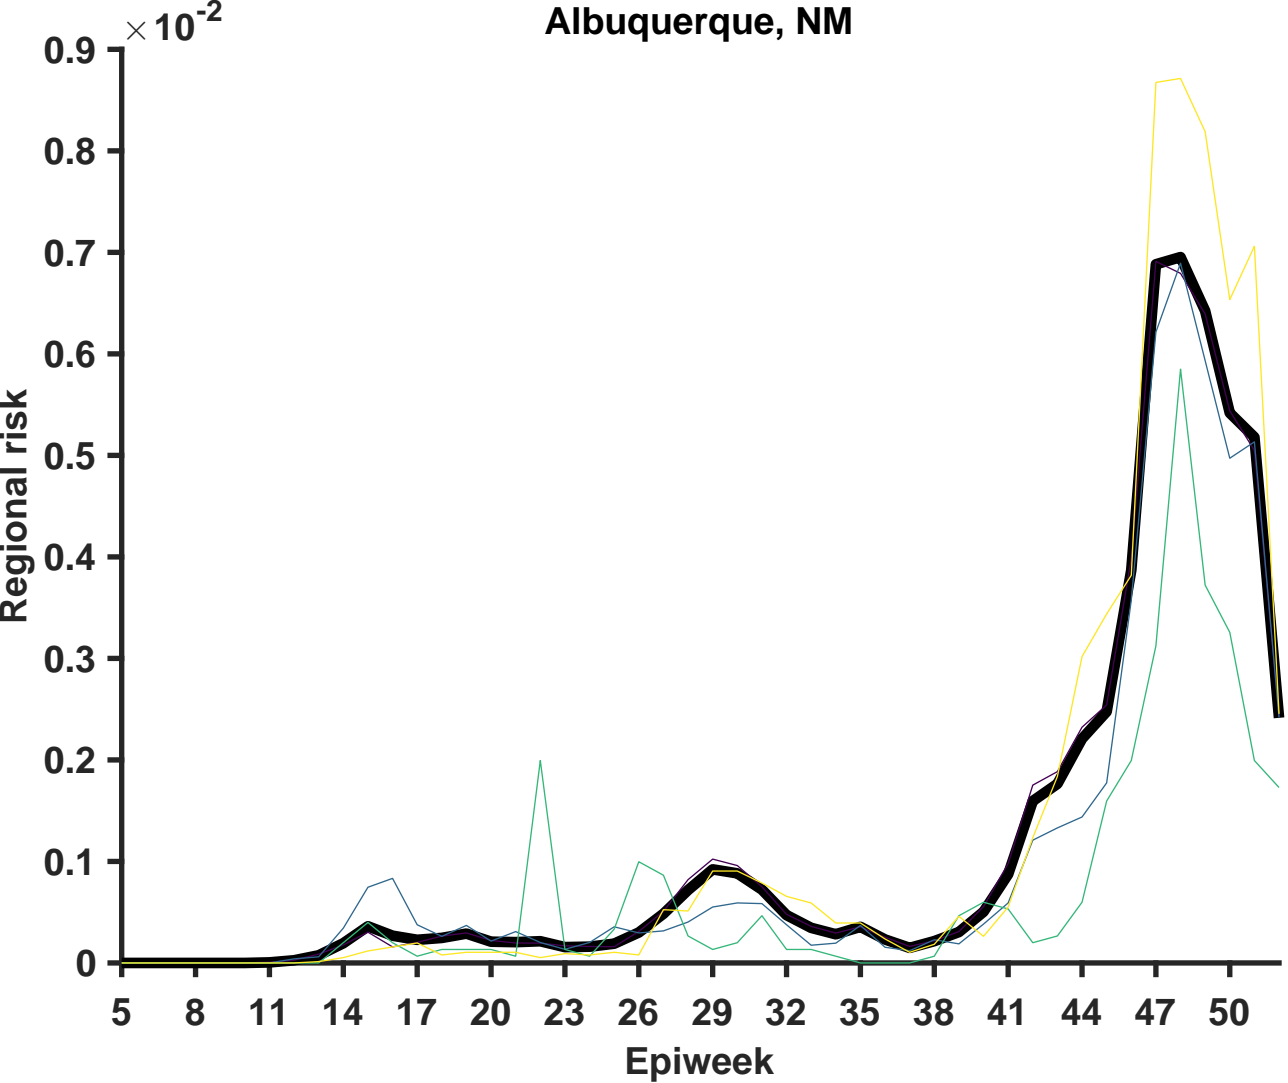

# Albany-Schenectady-Troy, NY

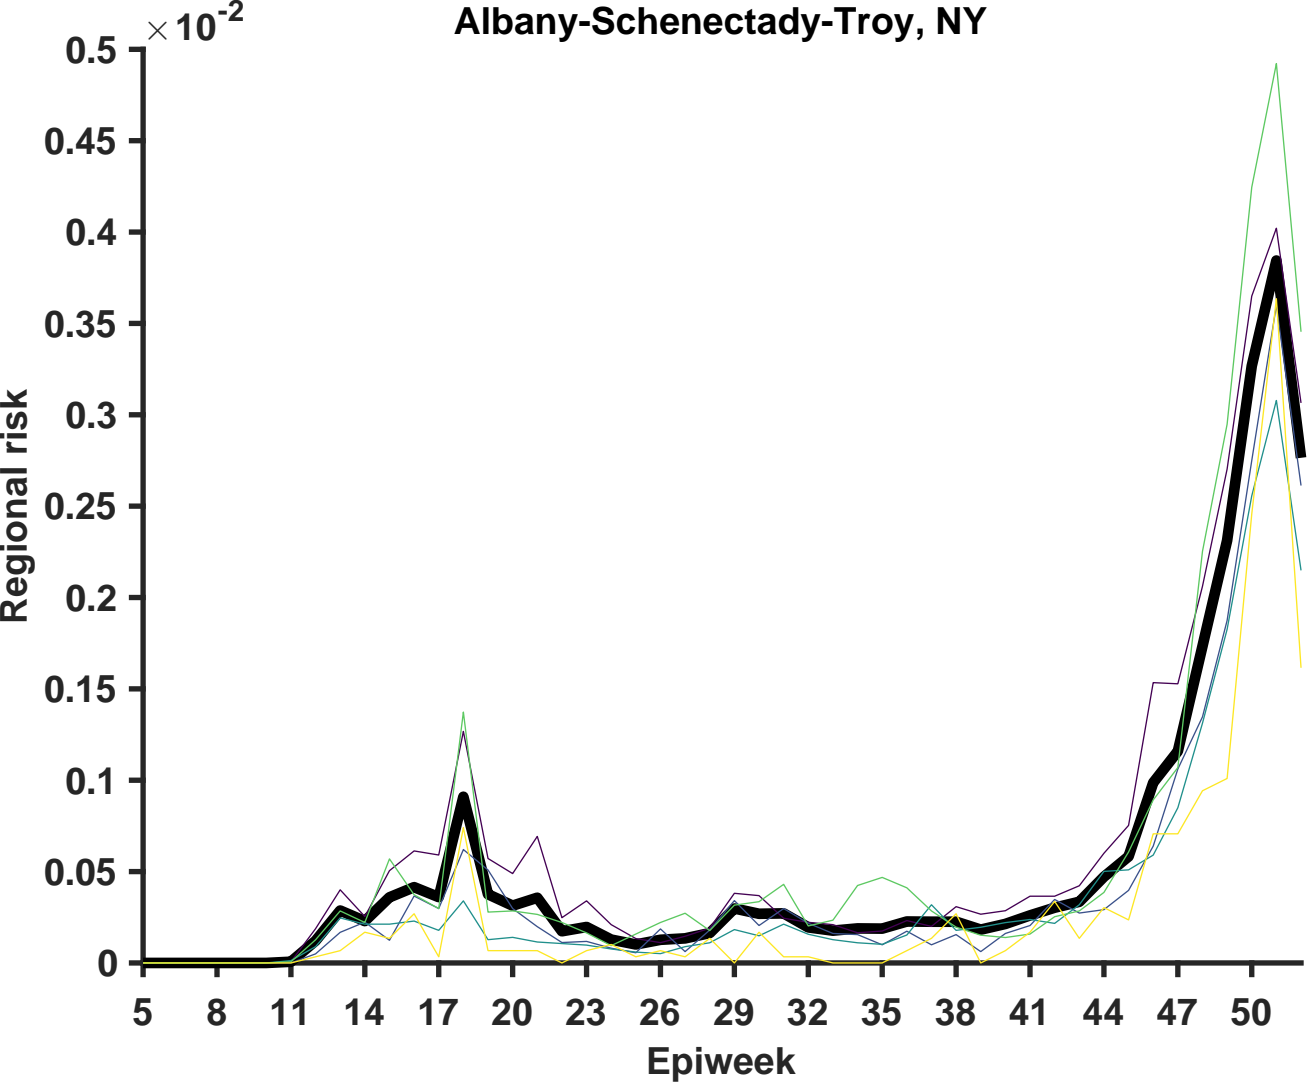

# Knoxville, TN

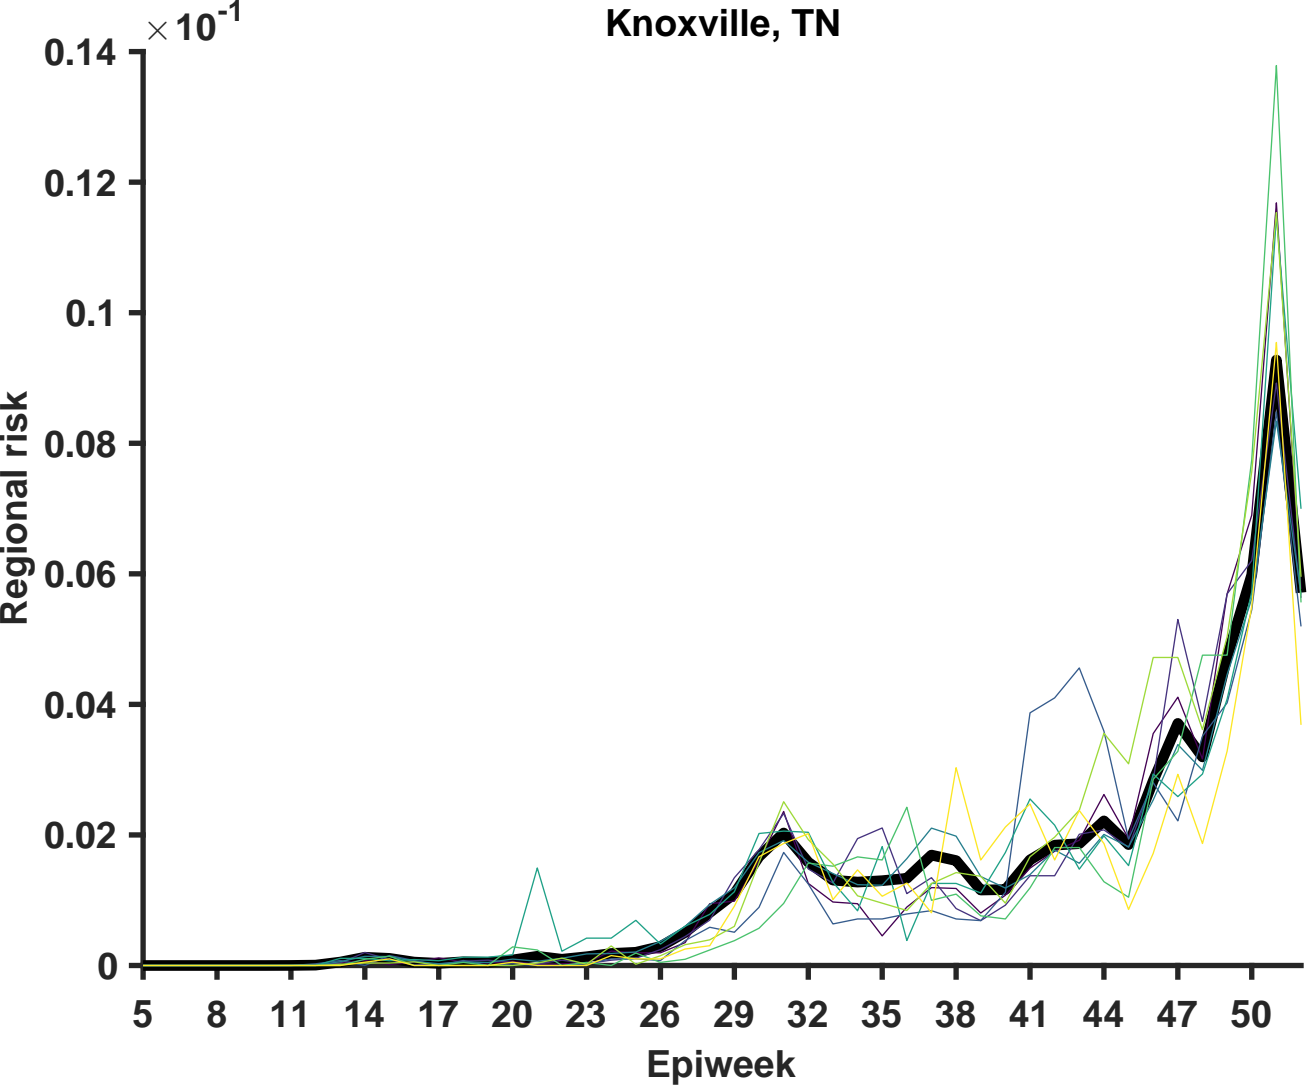

# Baton Rouge, LA

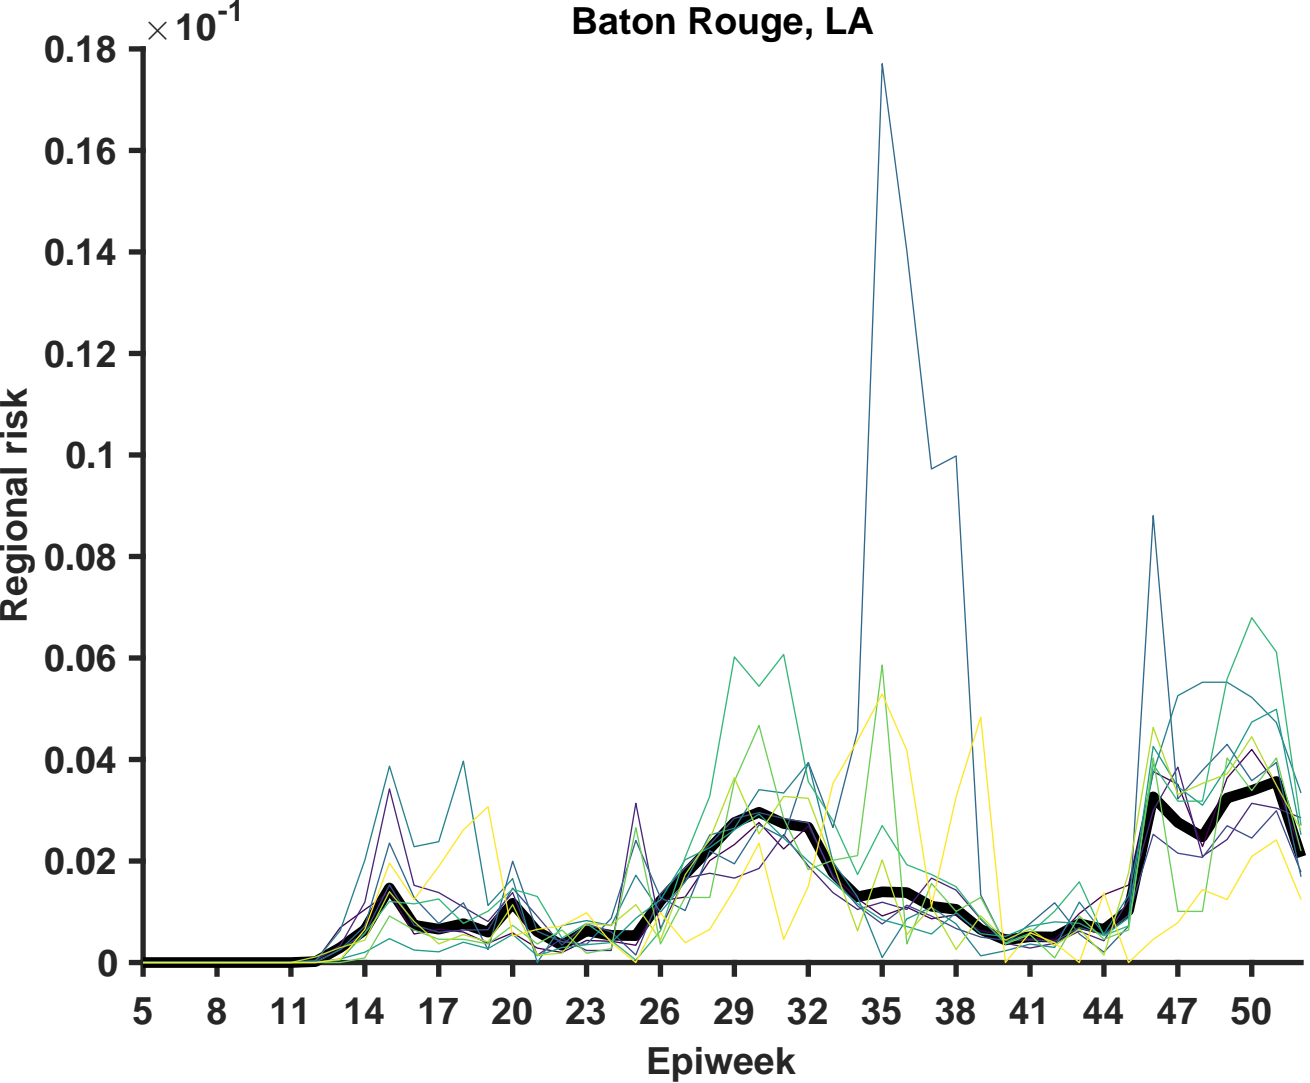

# El Paso, TX

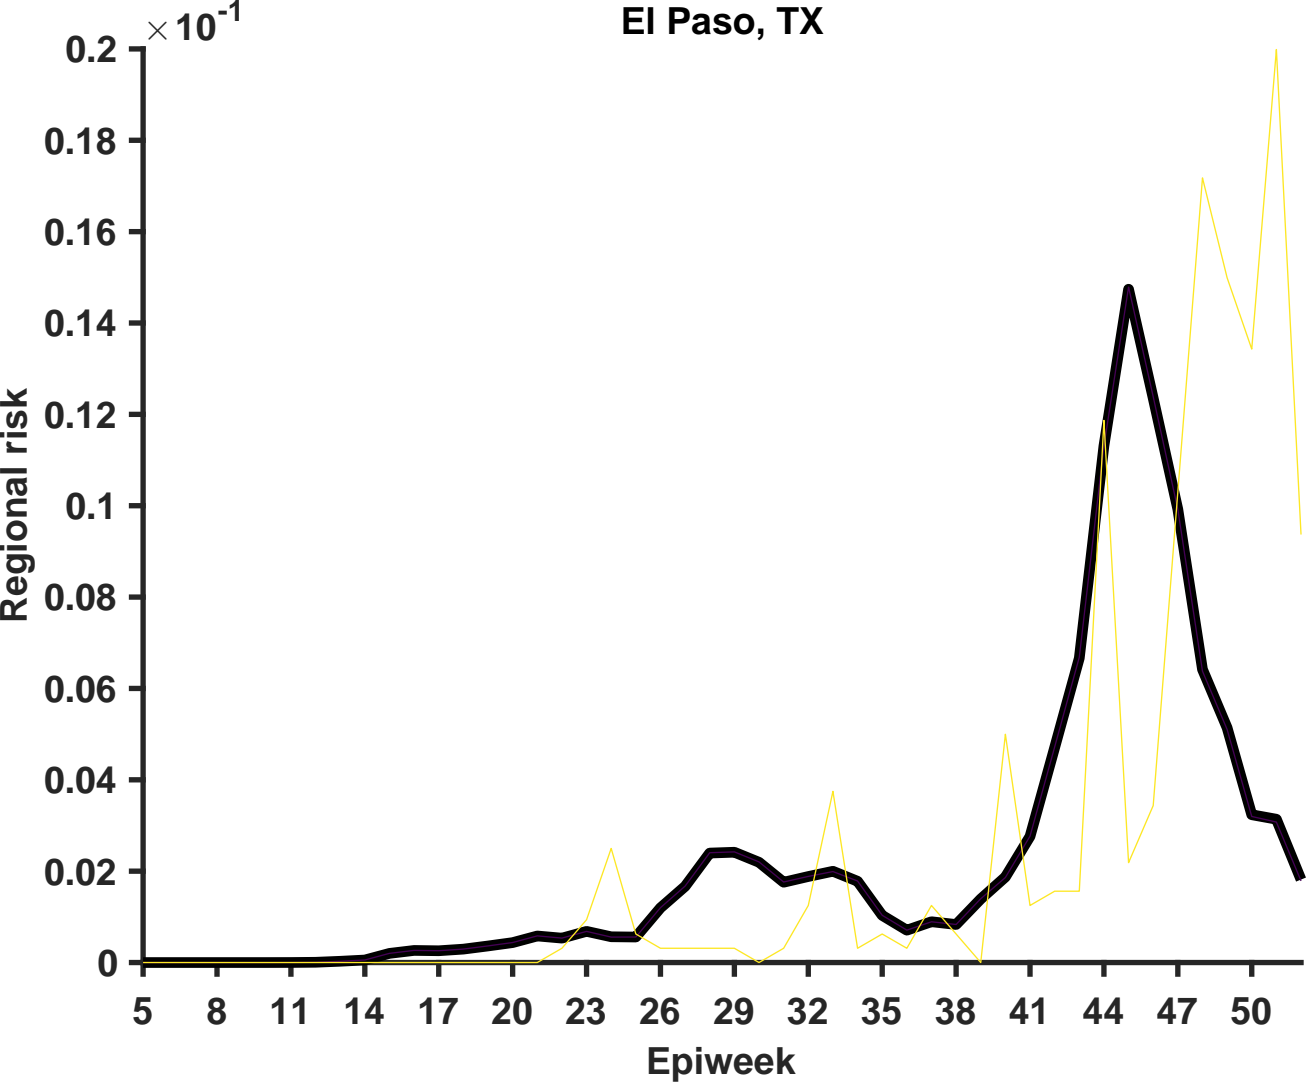

# Allentown-Bethlehem-Easton, PA-NJ

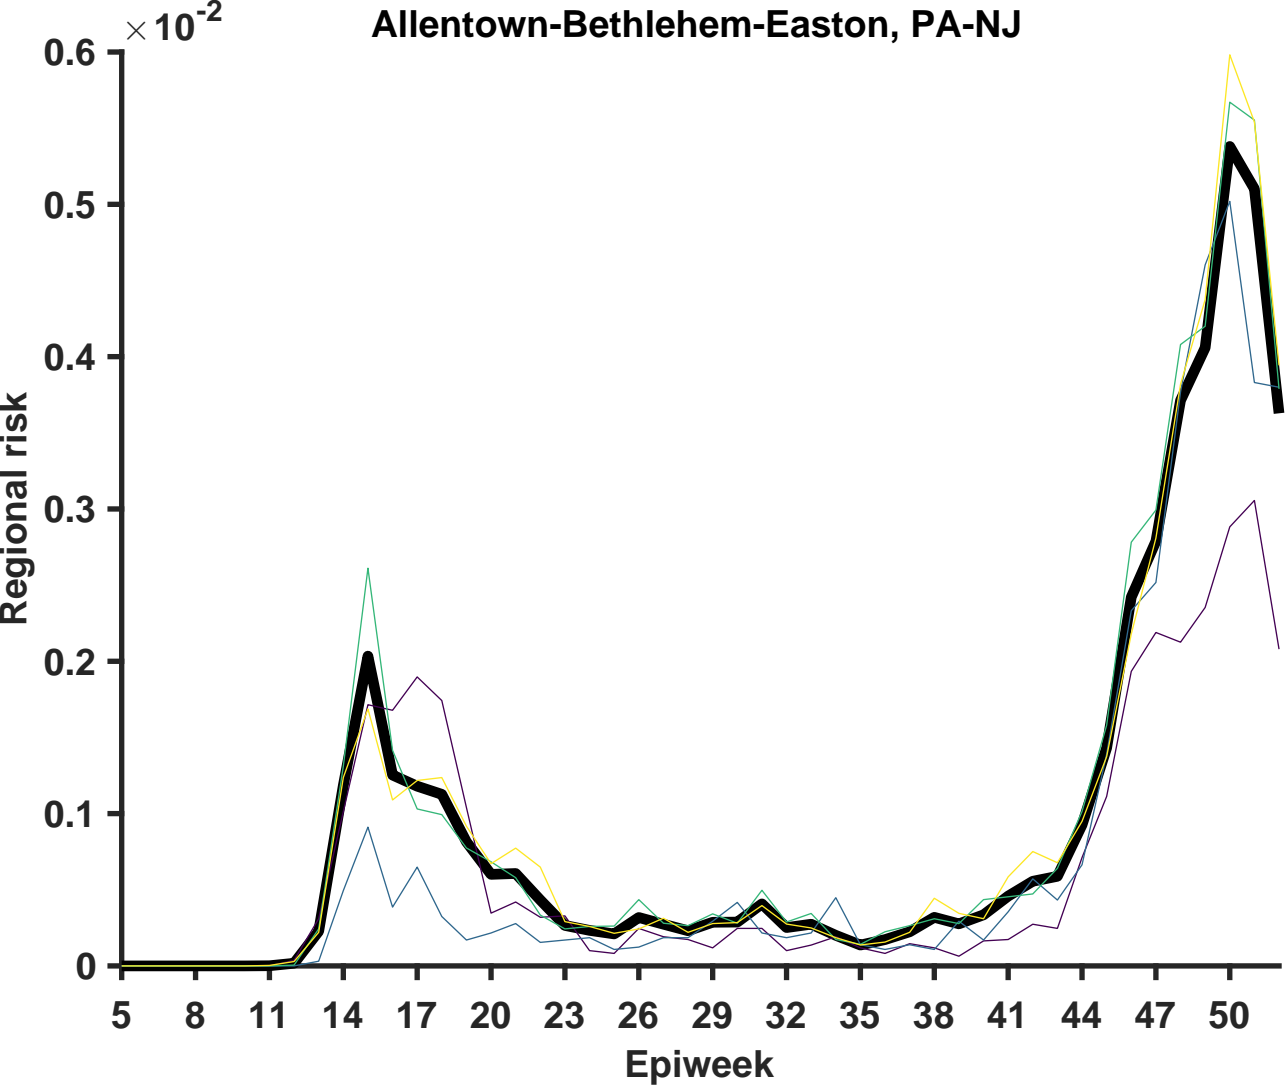



# North Port-Sarasota-Bradenton, FL

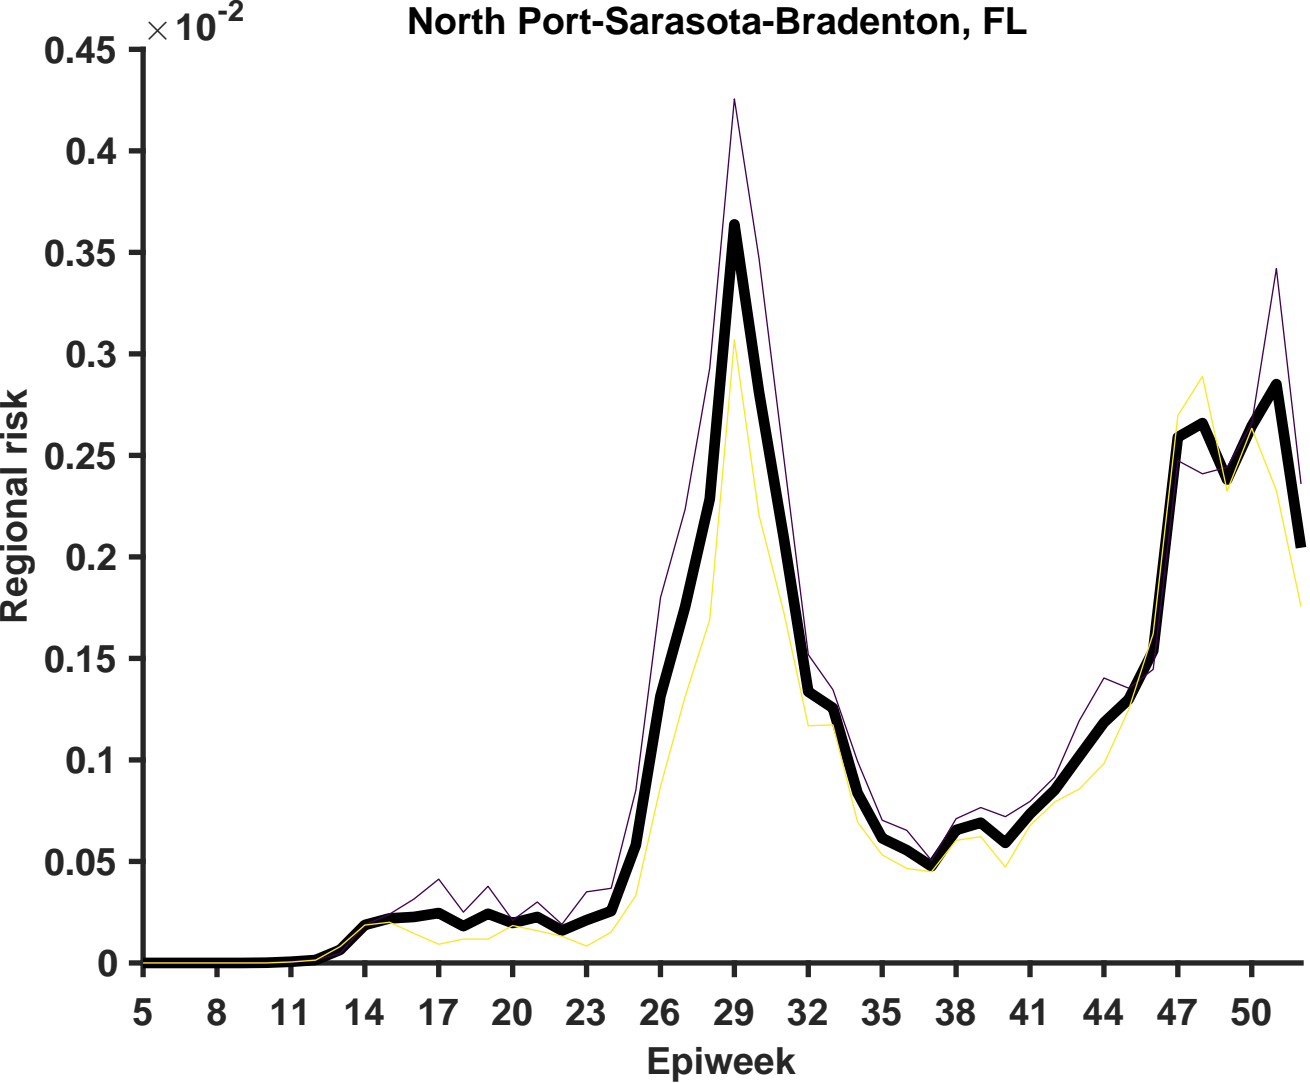

# Columbia, SC

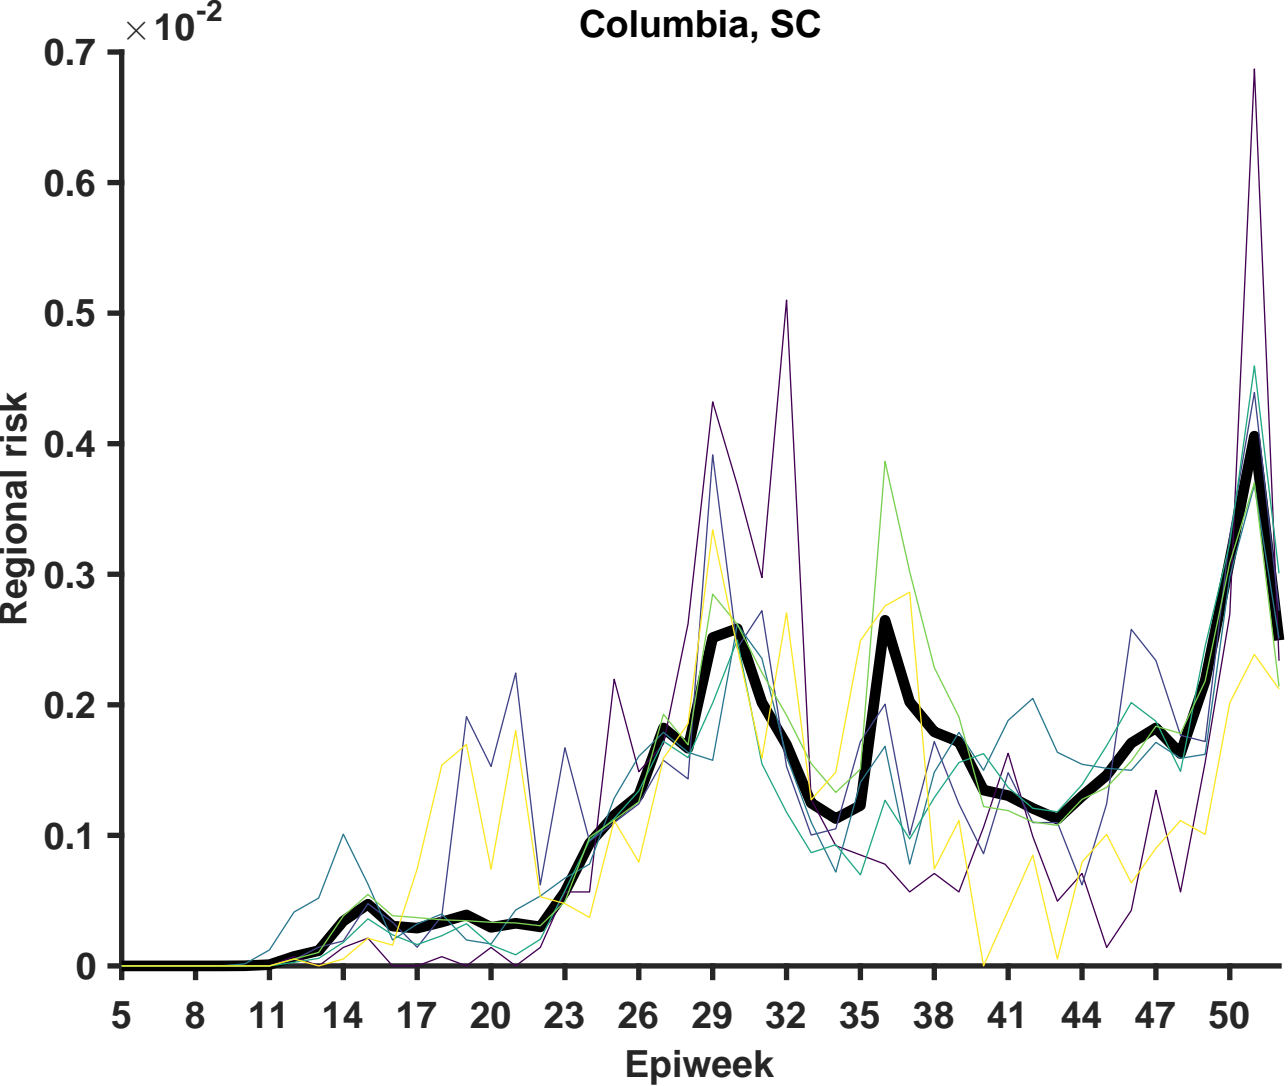

# Dayton, OH

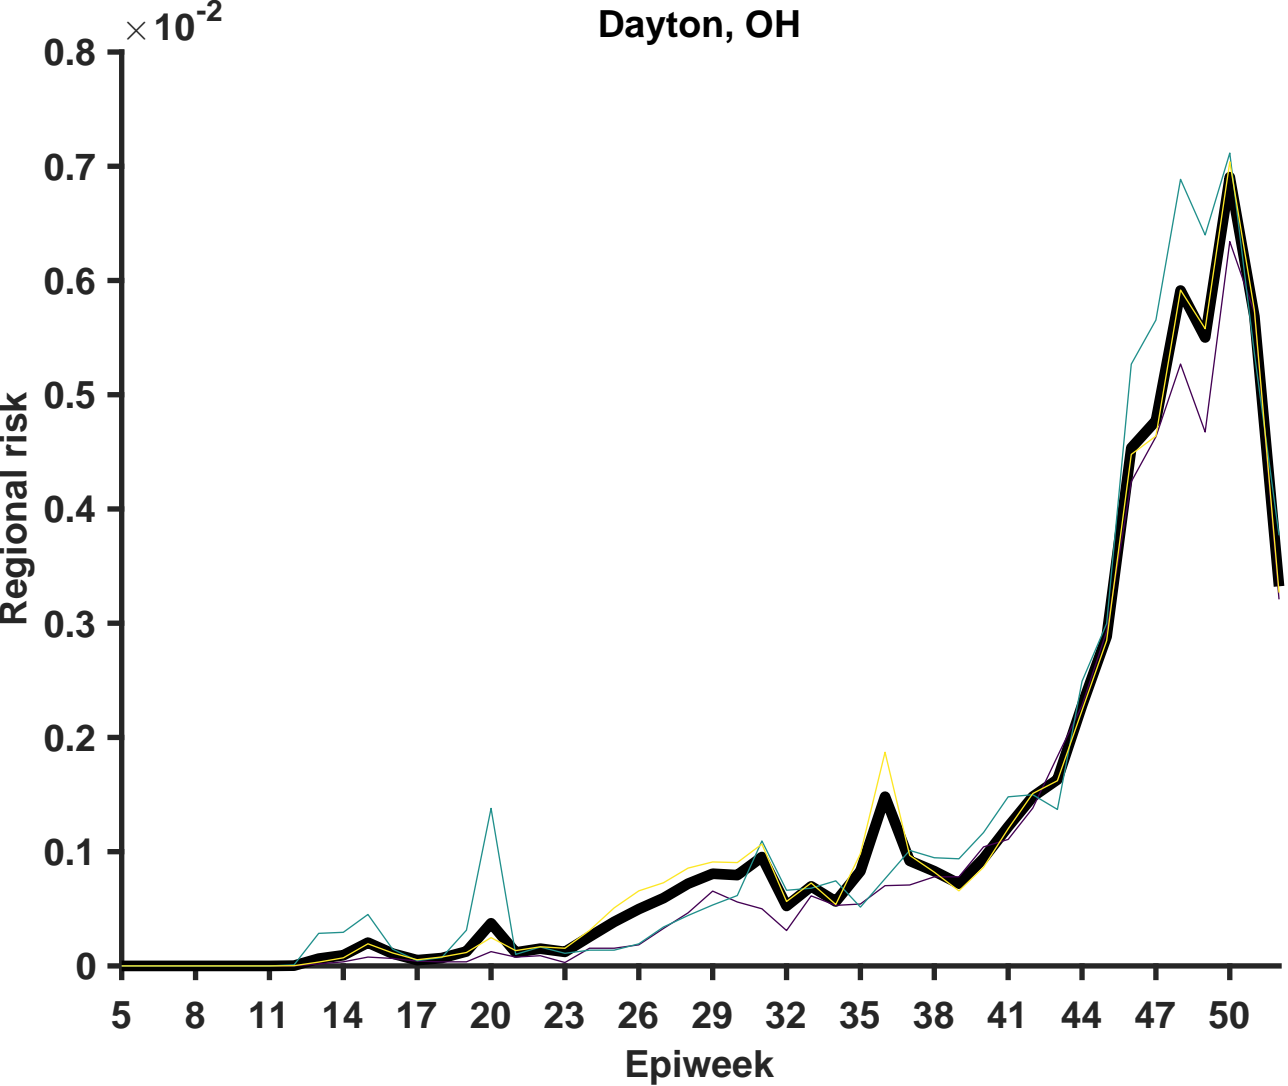

# Charleston-North Charleston, SC

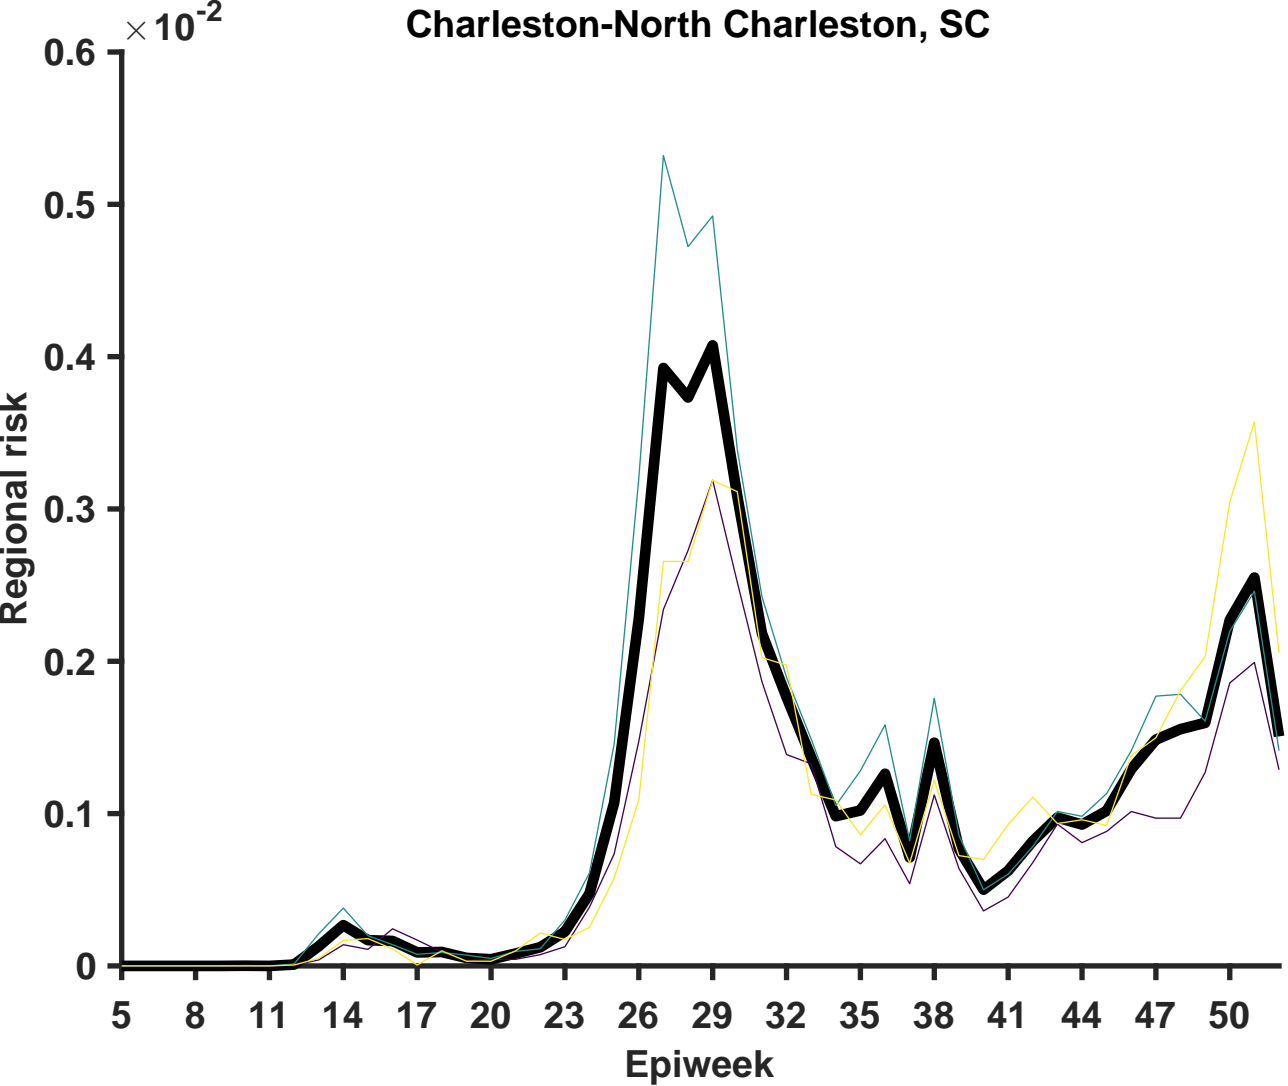

# Greensboro-High Point, NC

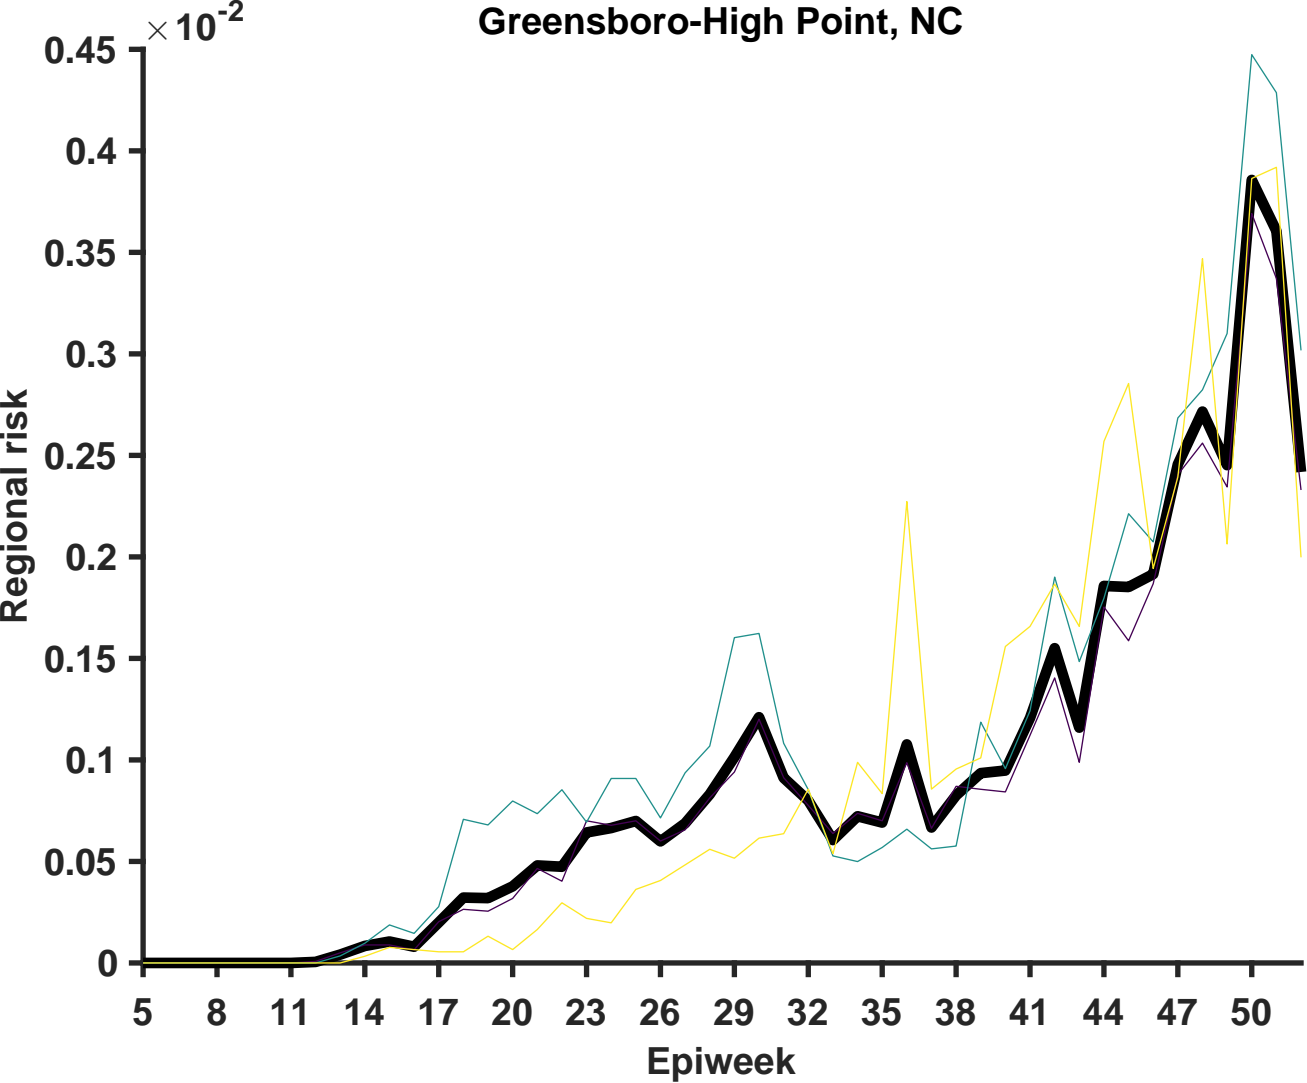

# Boise City, ID

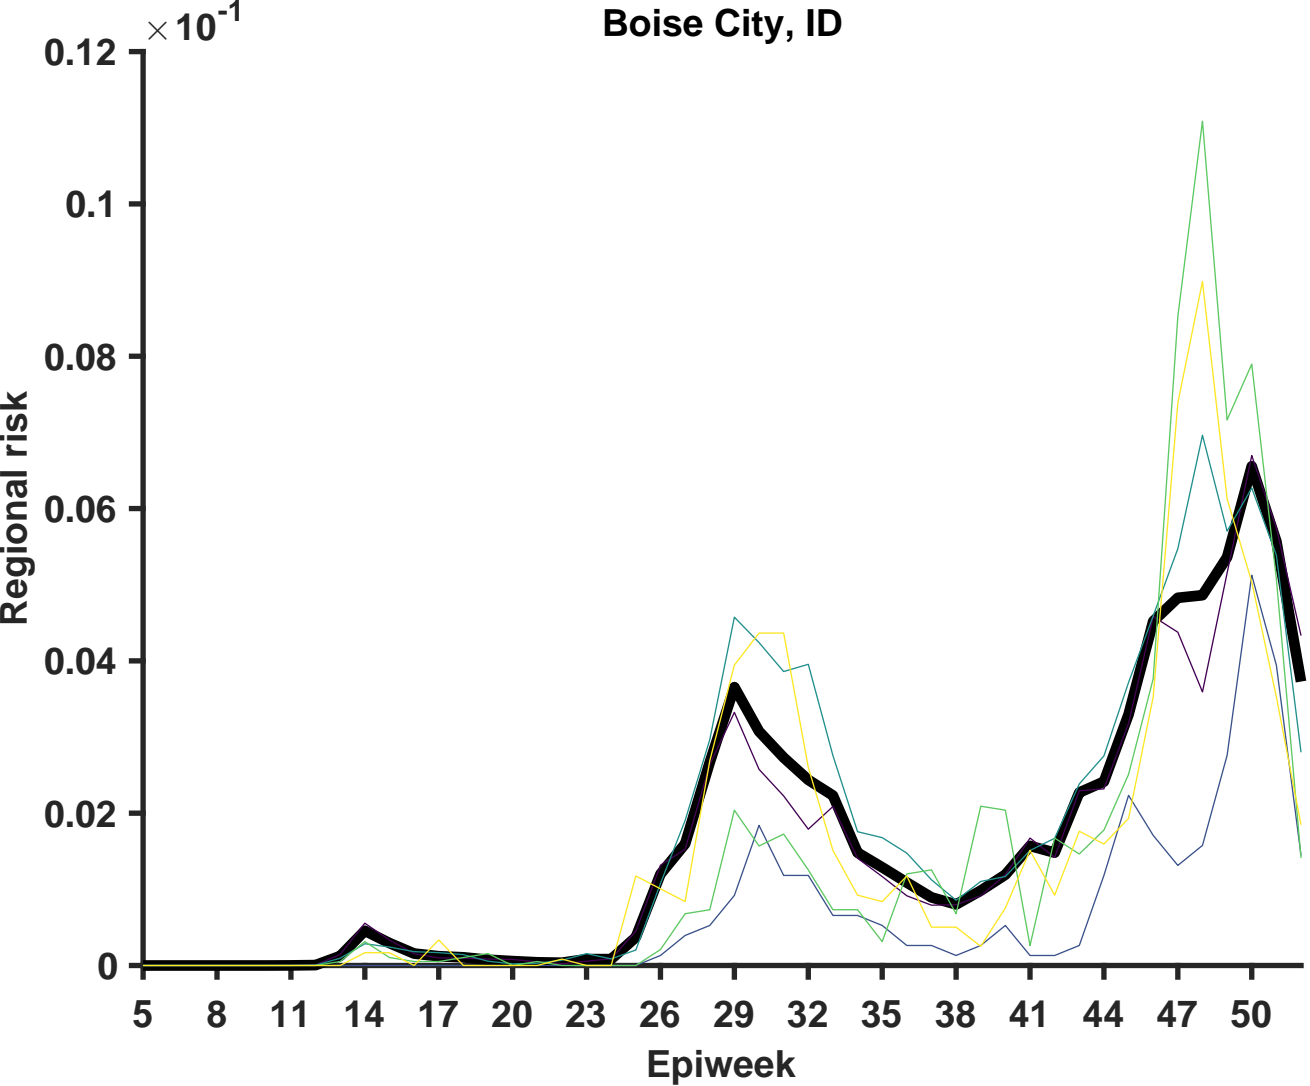

# Colorado Springs, CO

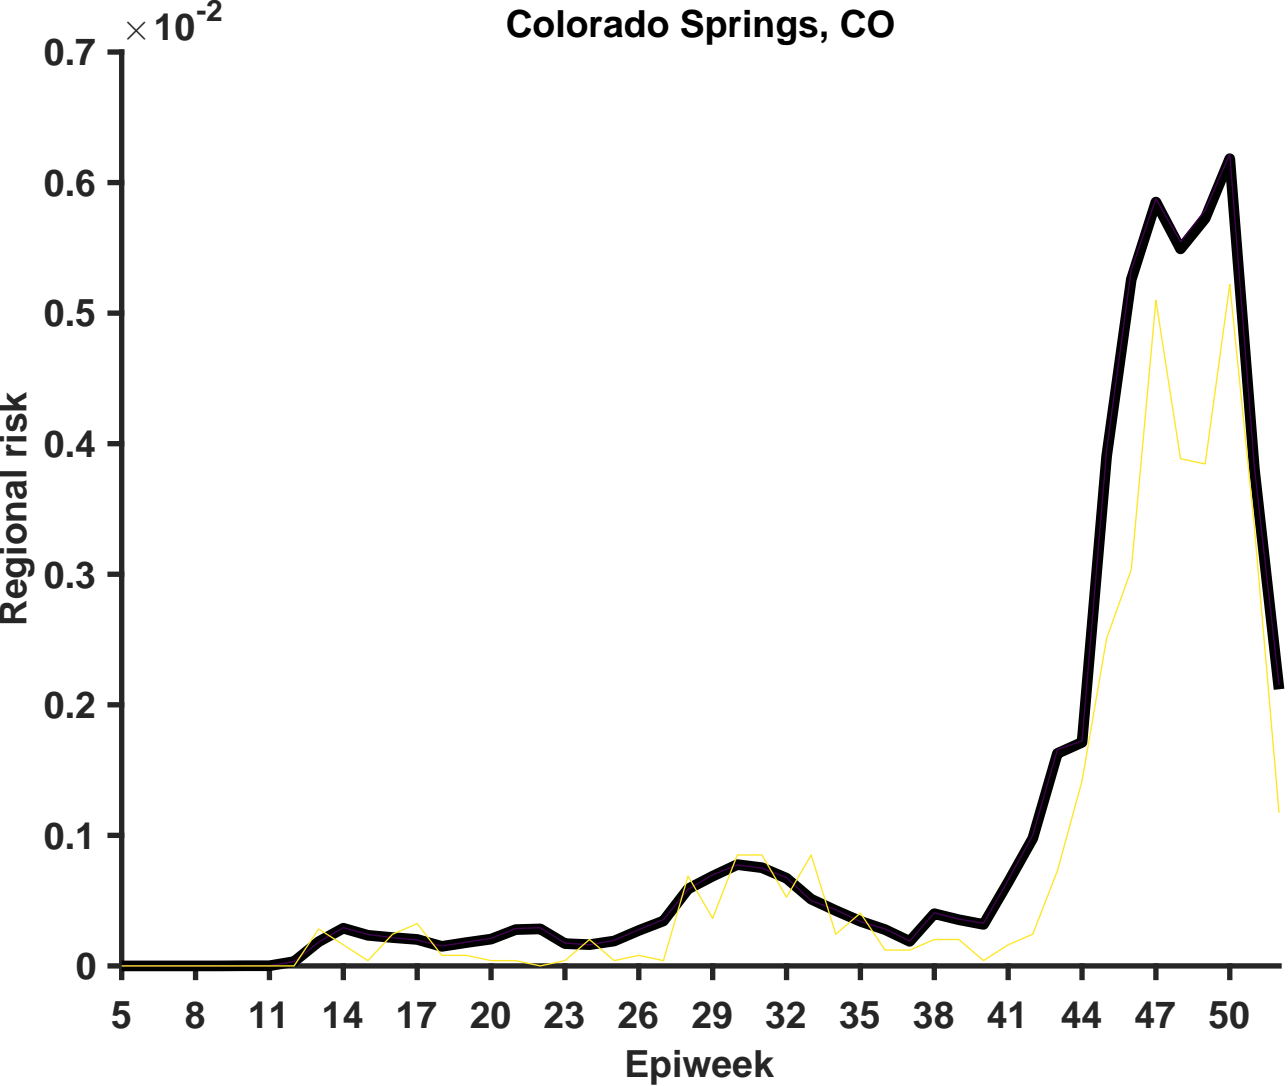

# Little Rock-North Little Rock-Conway, AR

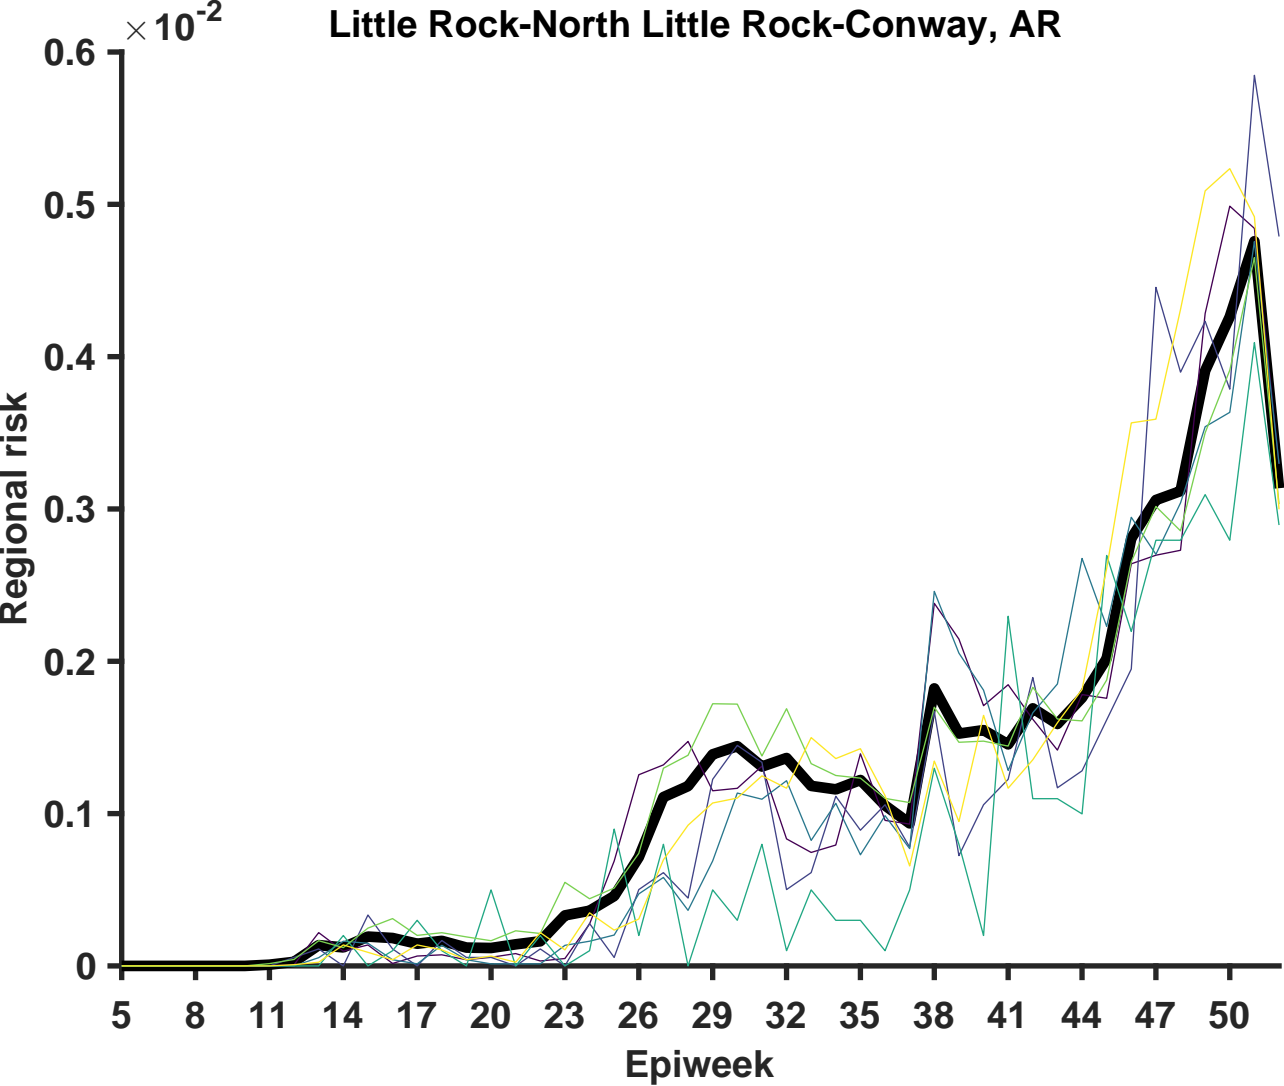



# Des Moines-West Des Moines, IA

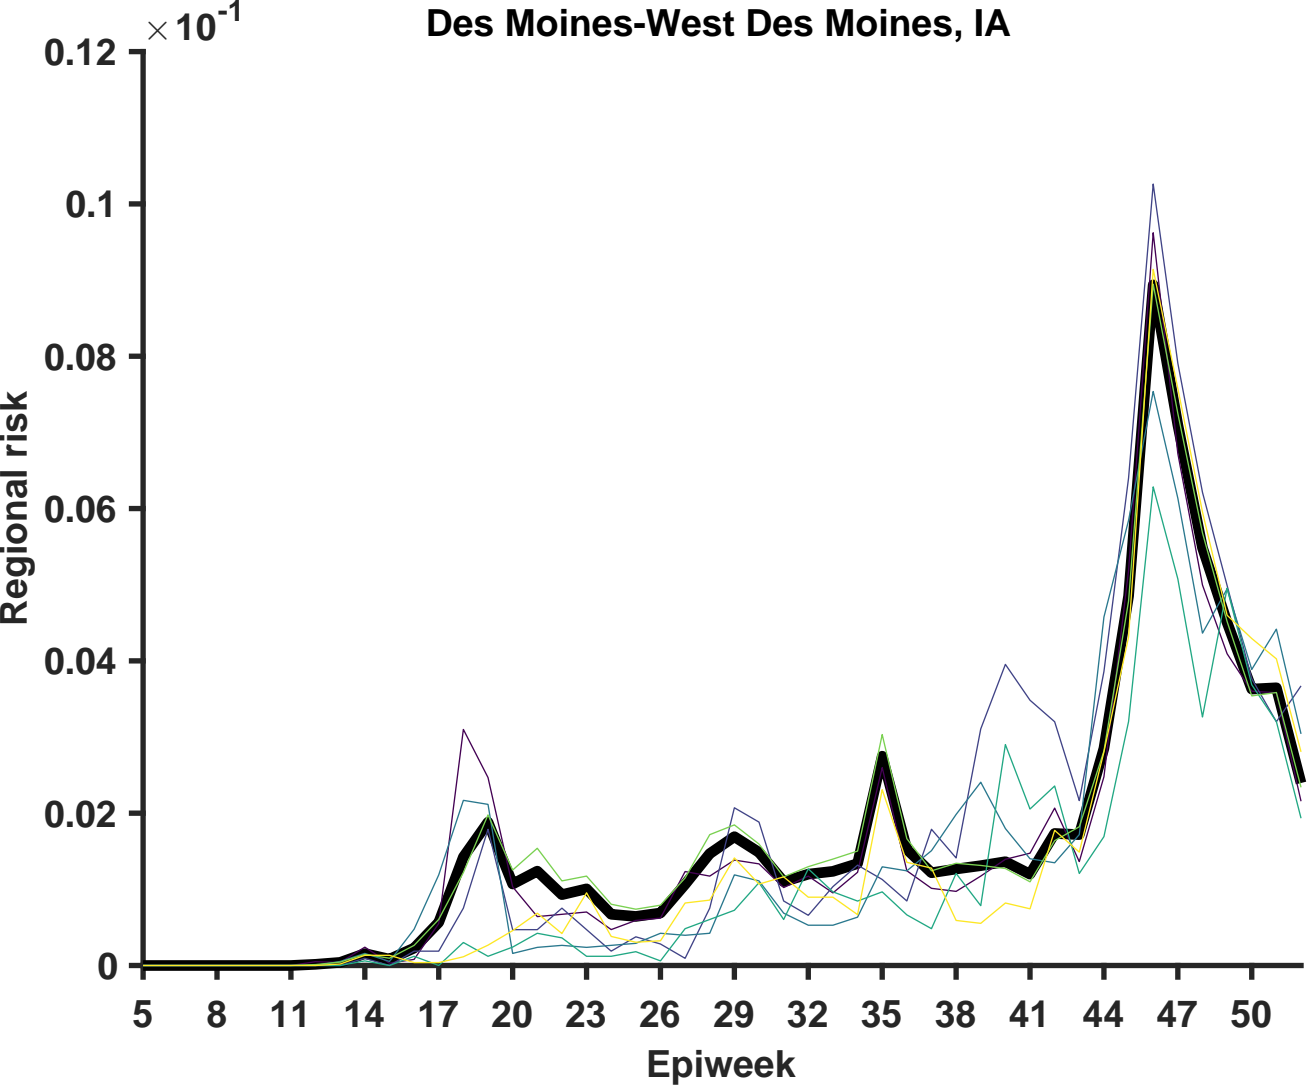

# Akron, OH

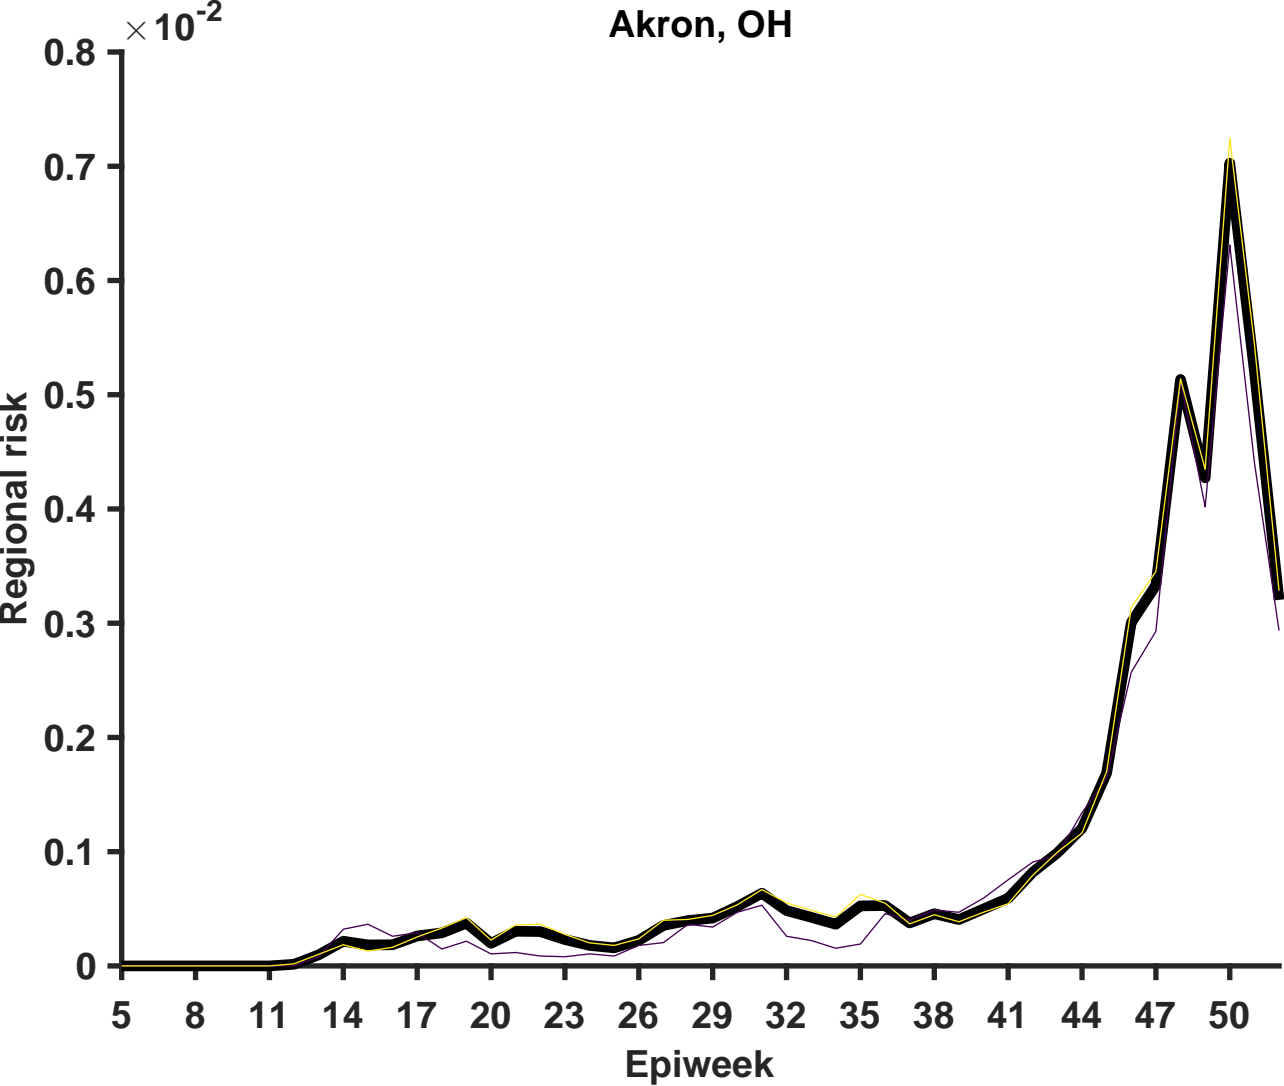

# Springfield, MA

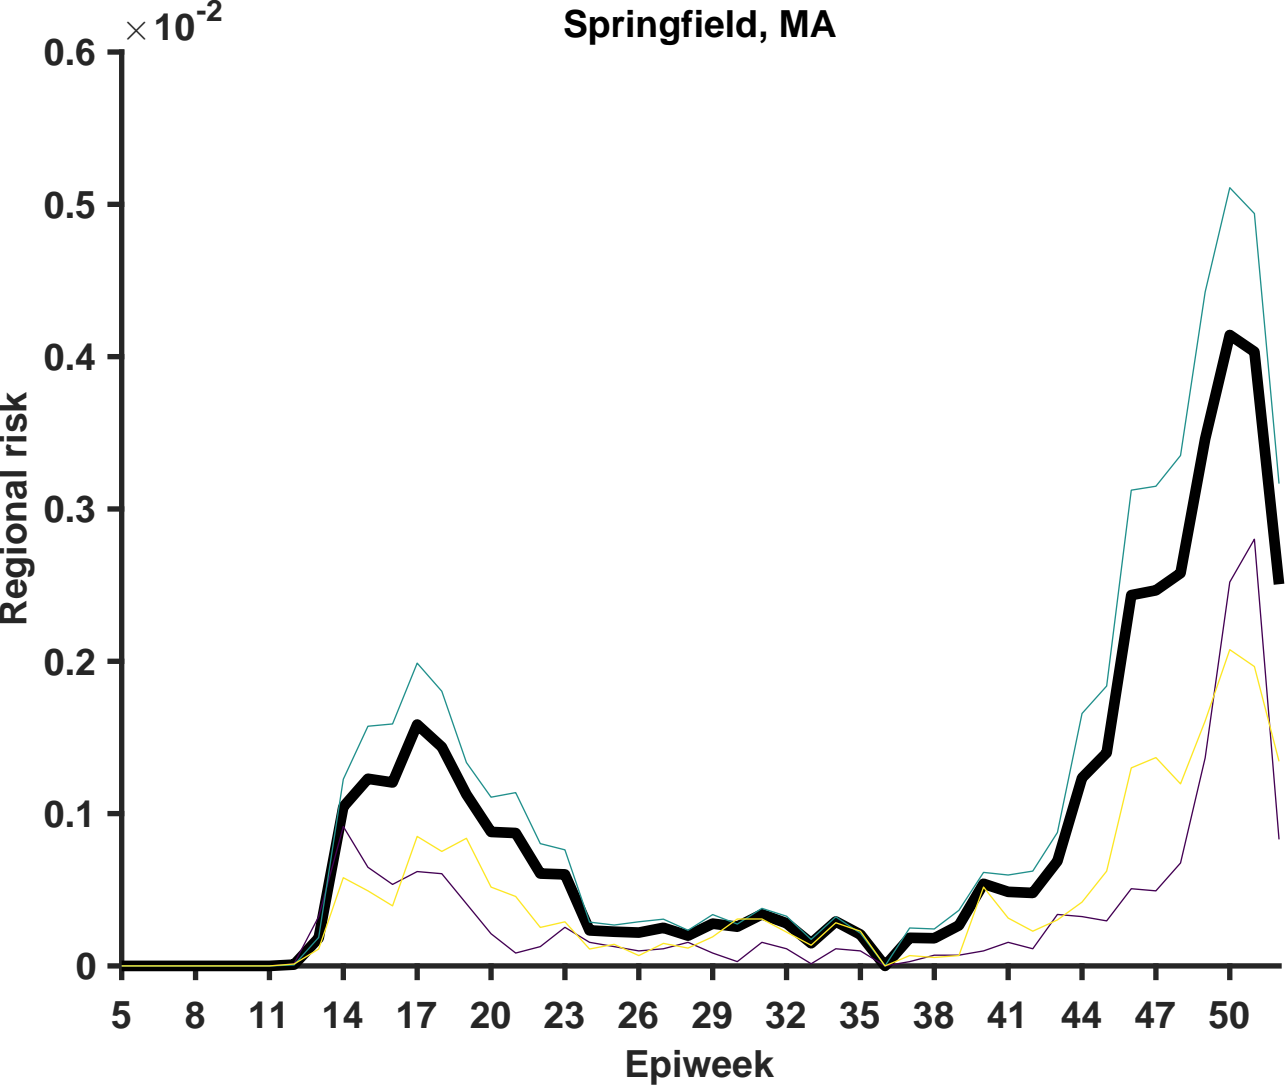

# Poughkeepsie-Newburgh-Middletown, NY

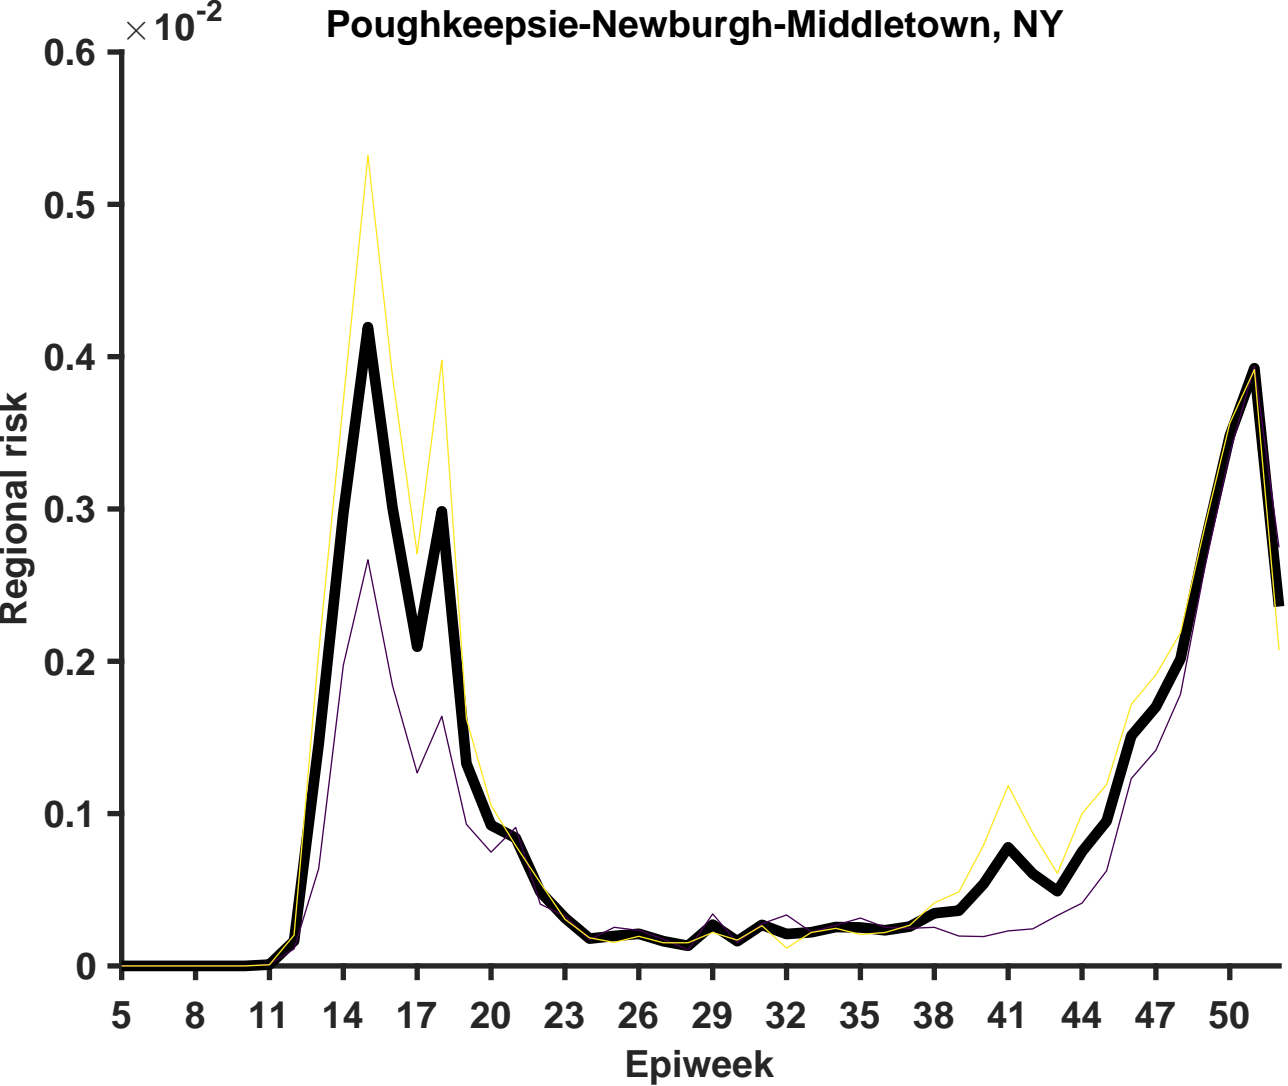

# Ogden-Clearfield, UT

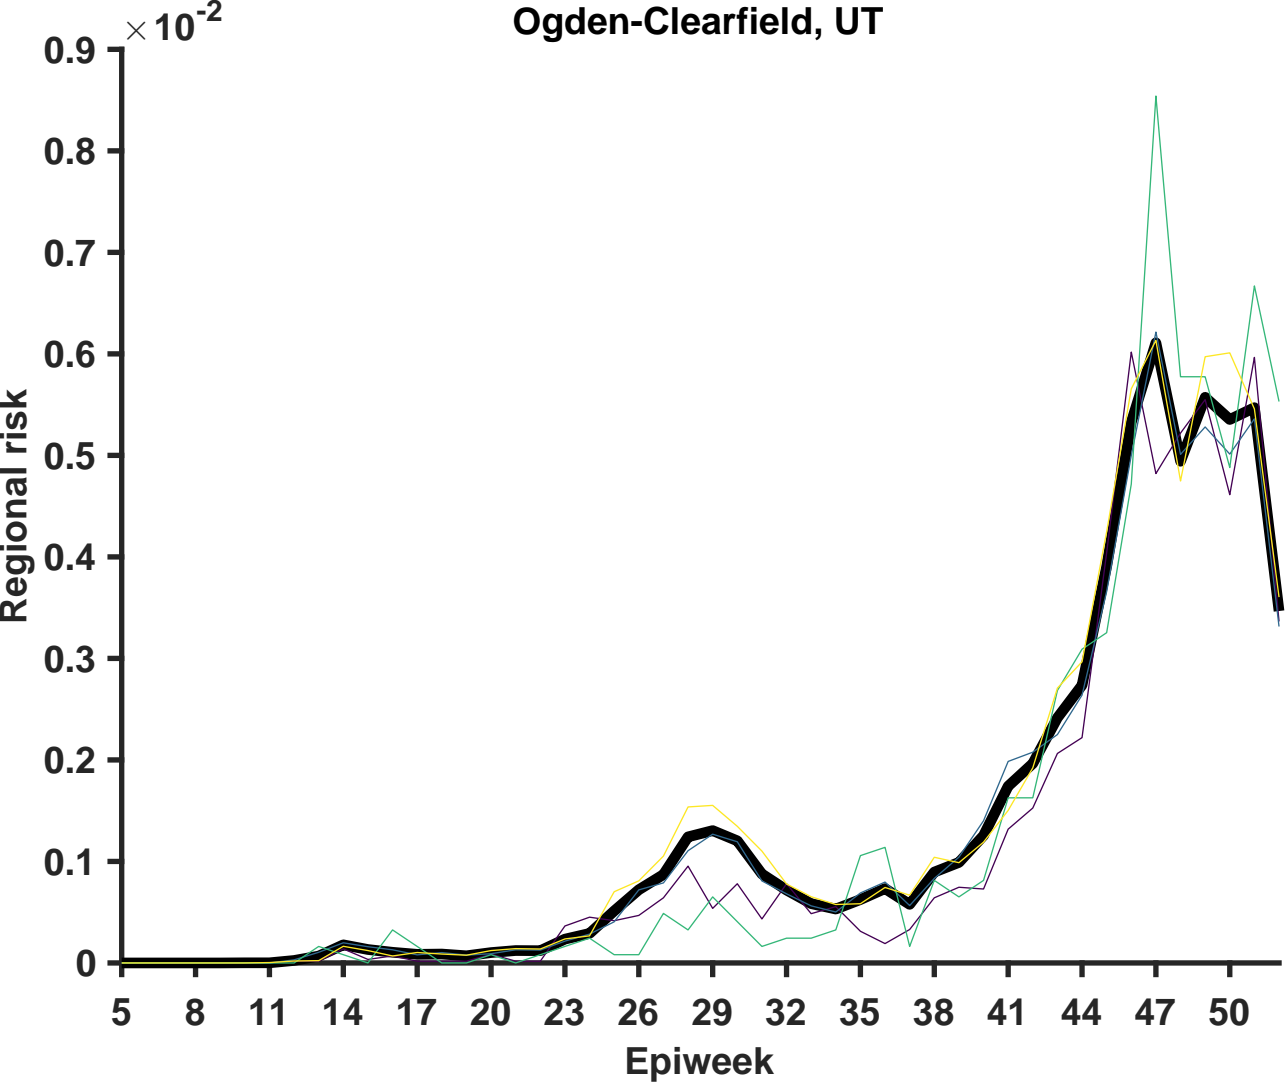

# Madison, WI

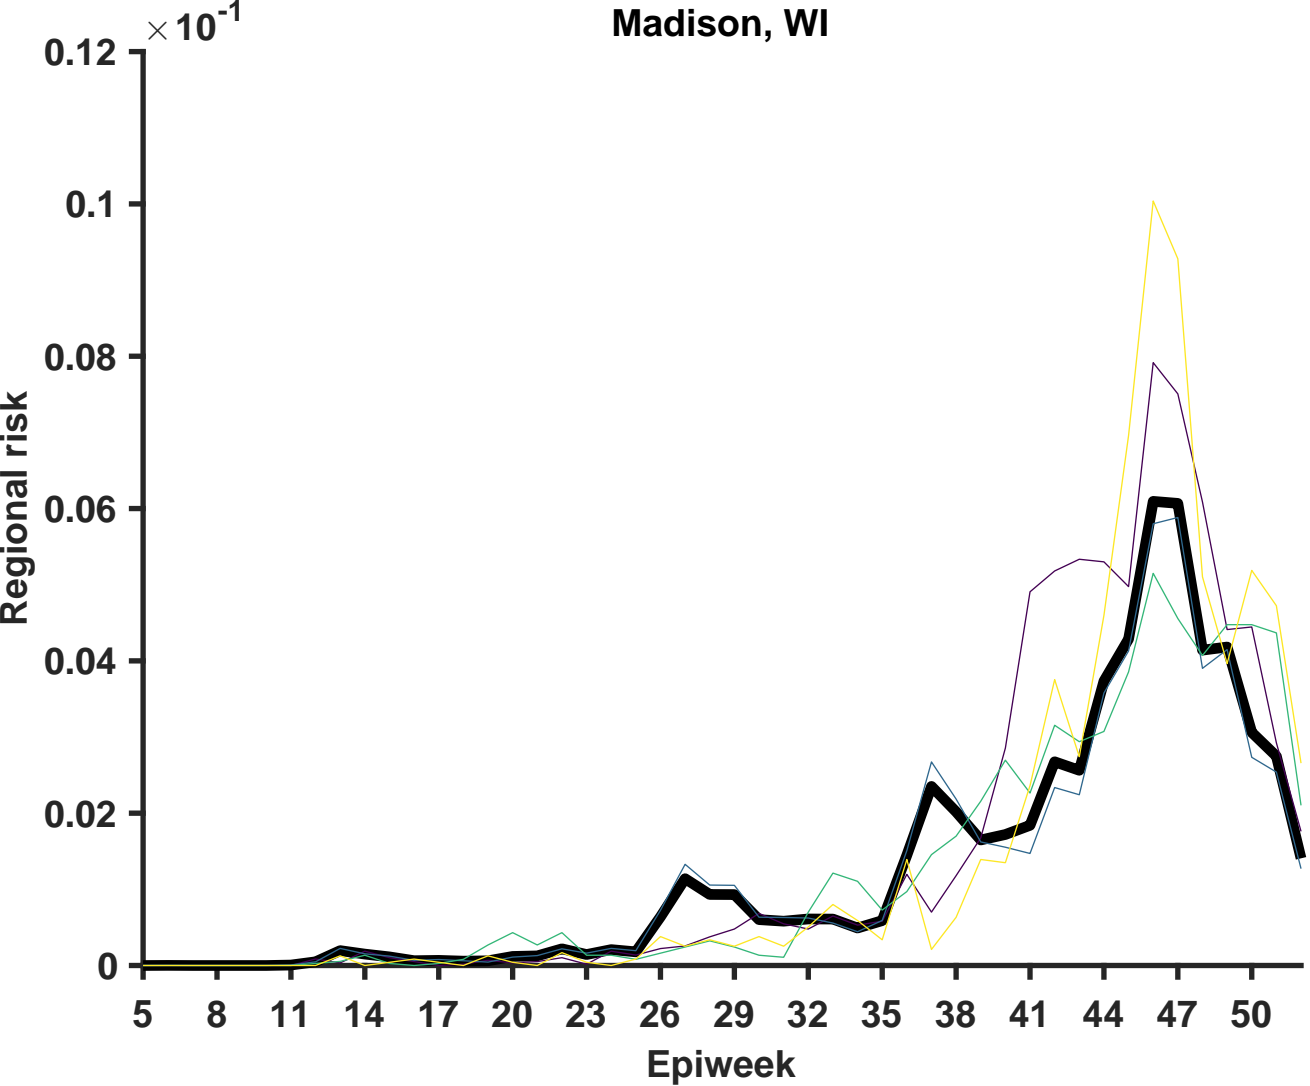

# Winston-Salem, NC

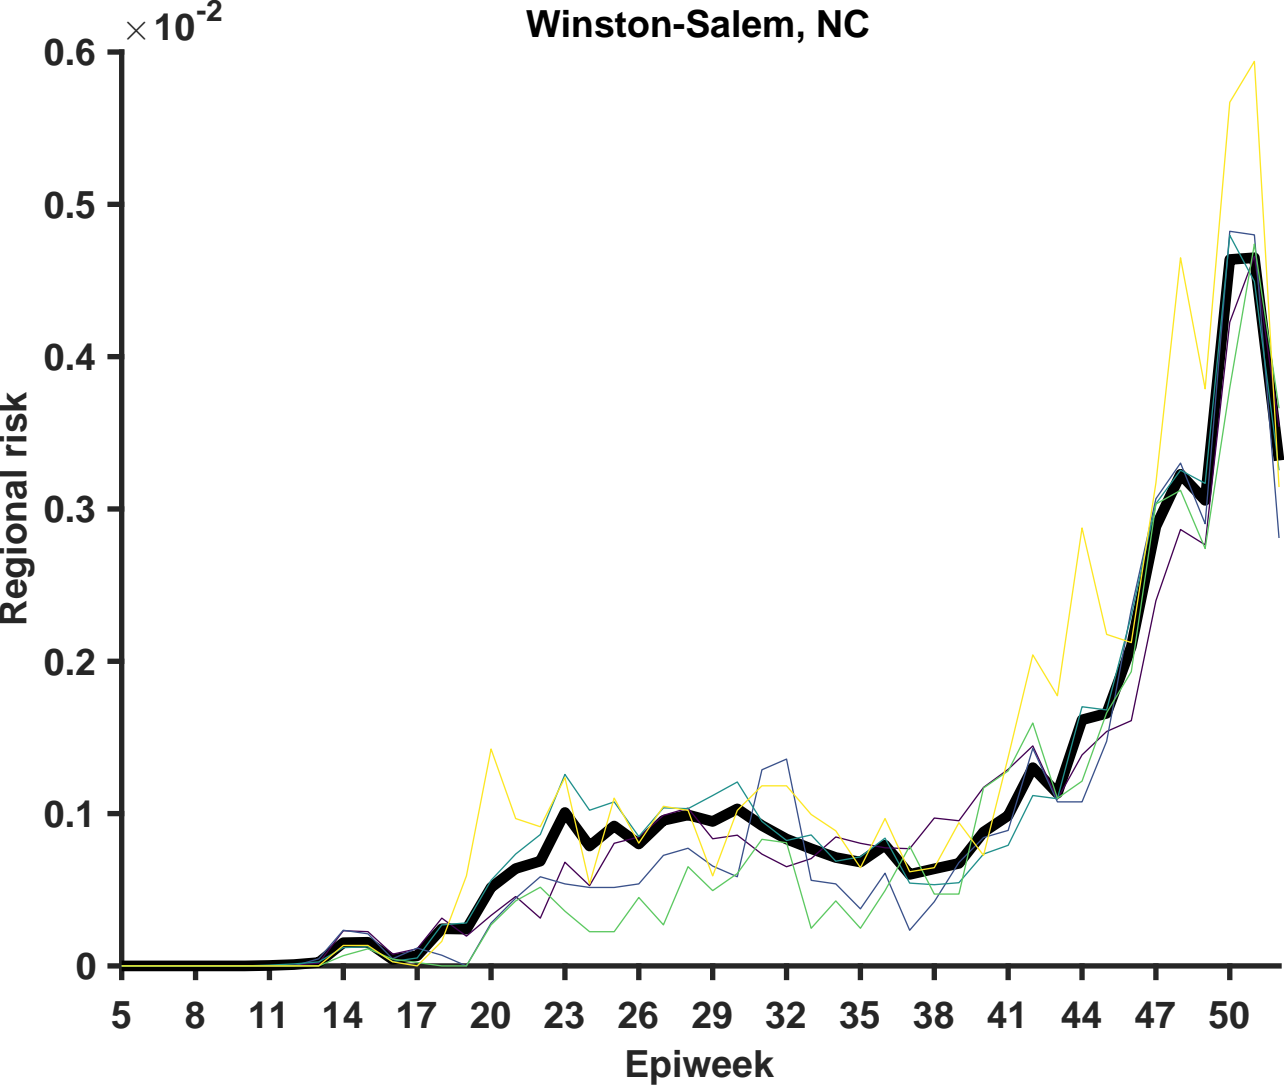

# Provo-Orem, UT

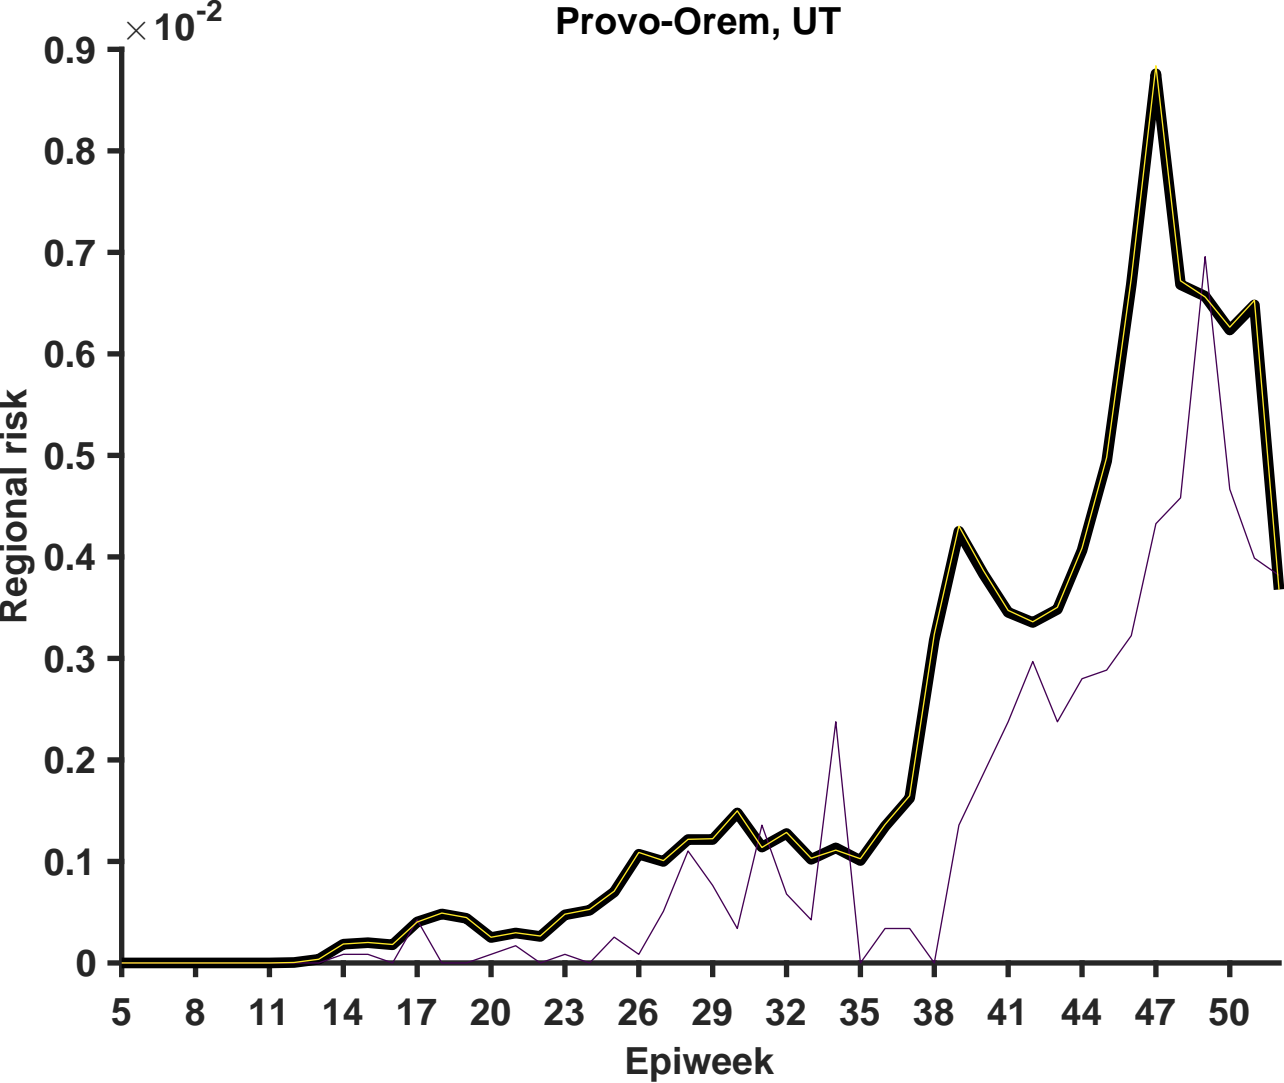



# Deltona-Daytona Beach-Ormond Beach, FL

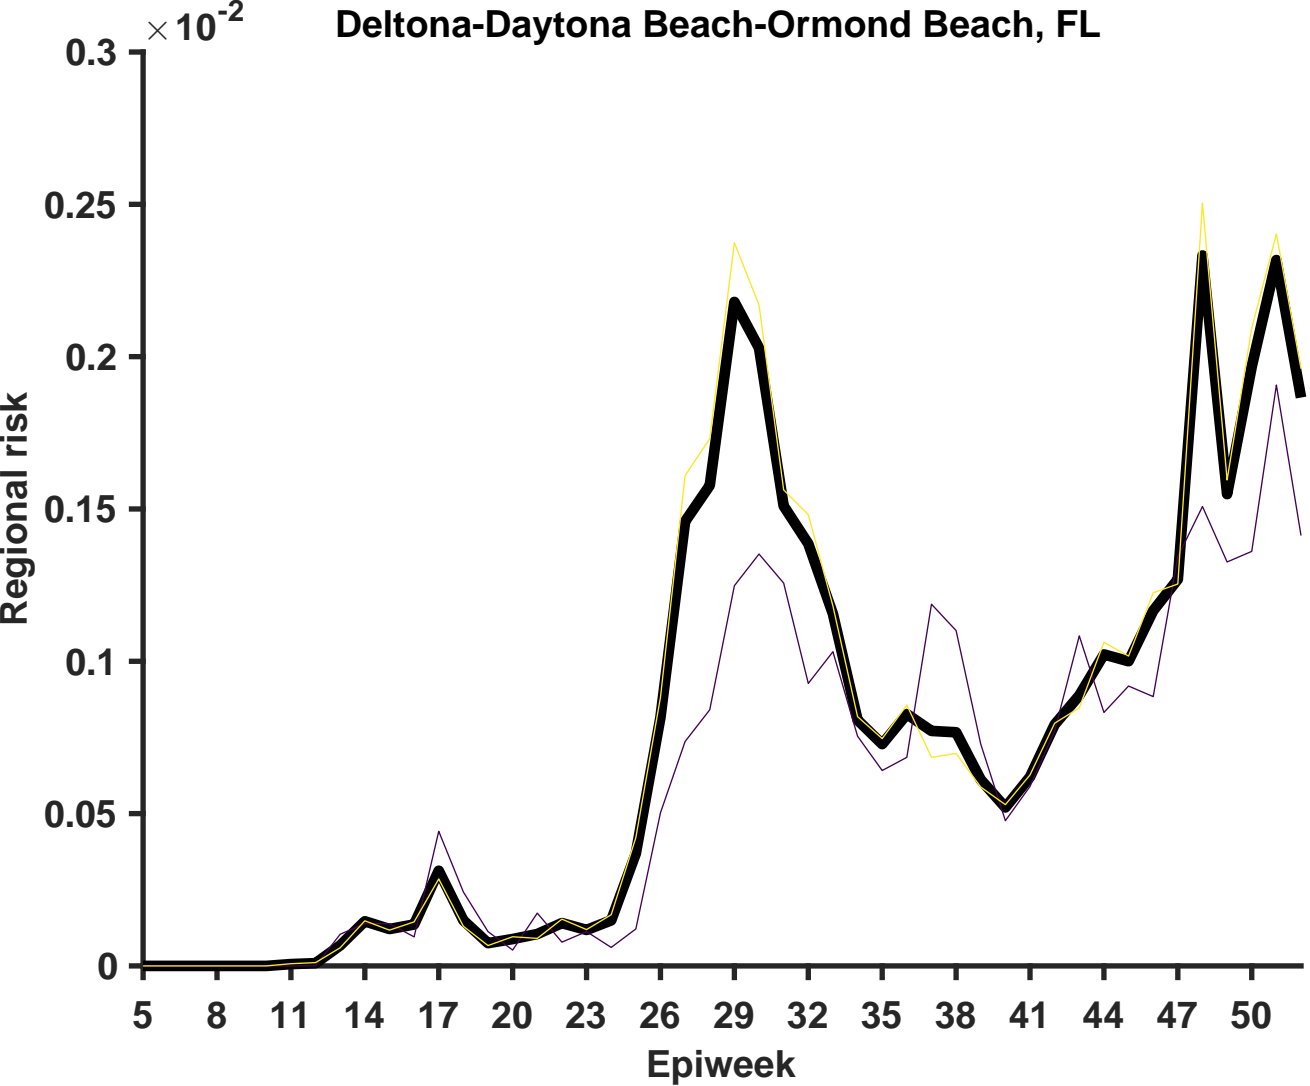

# Syracuse, NY

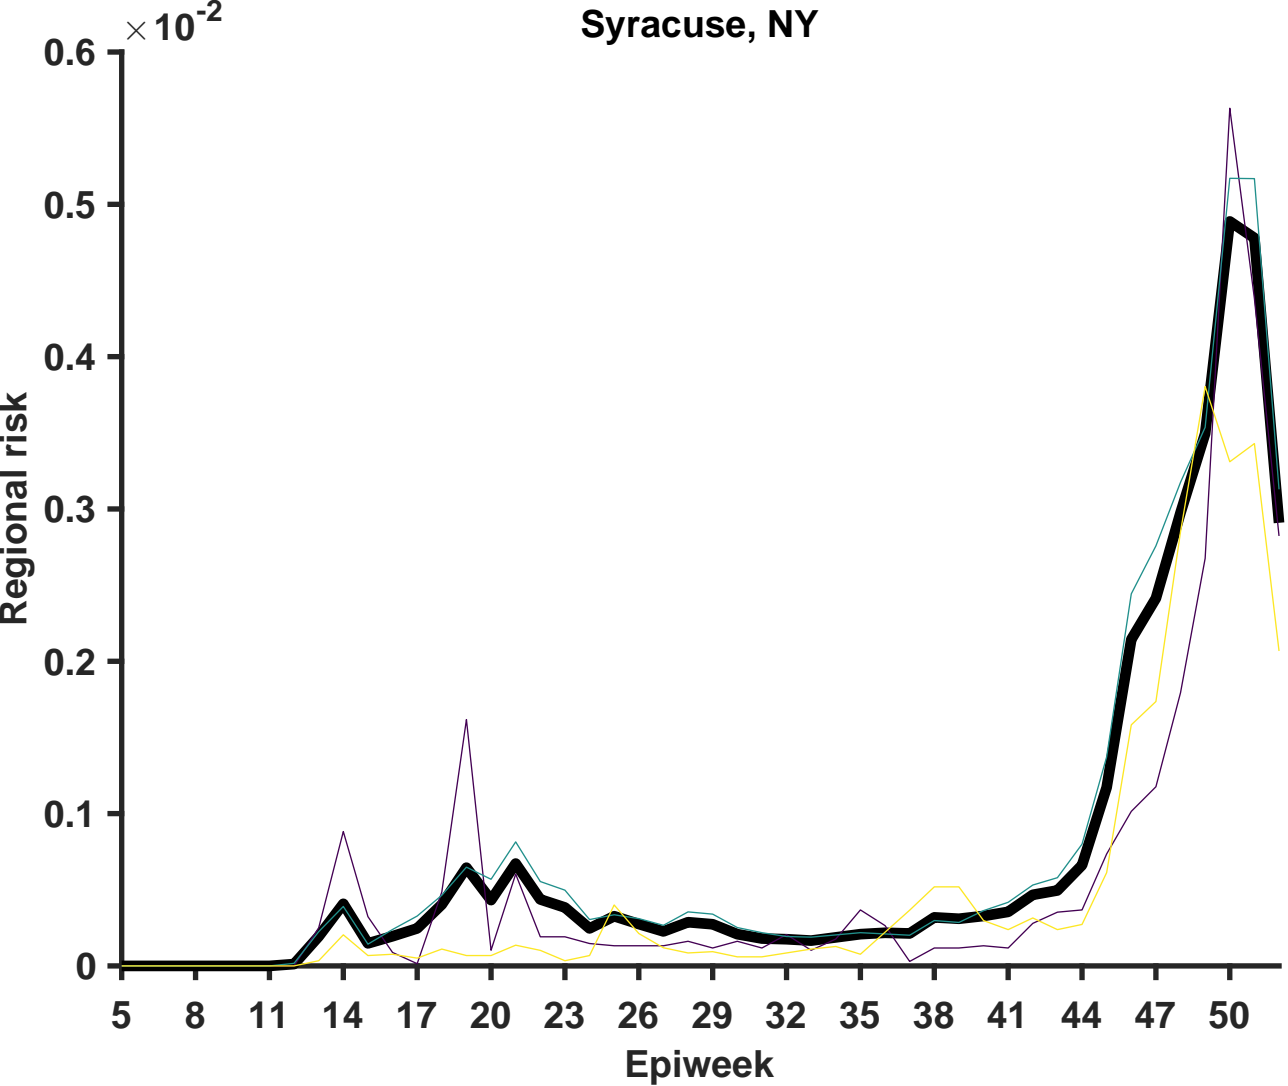

# Durham-Chapel Hill, NC

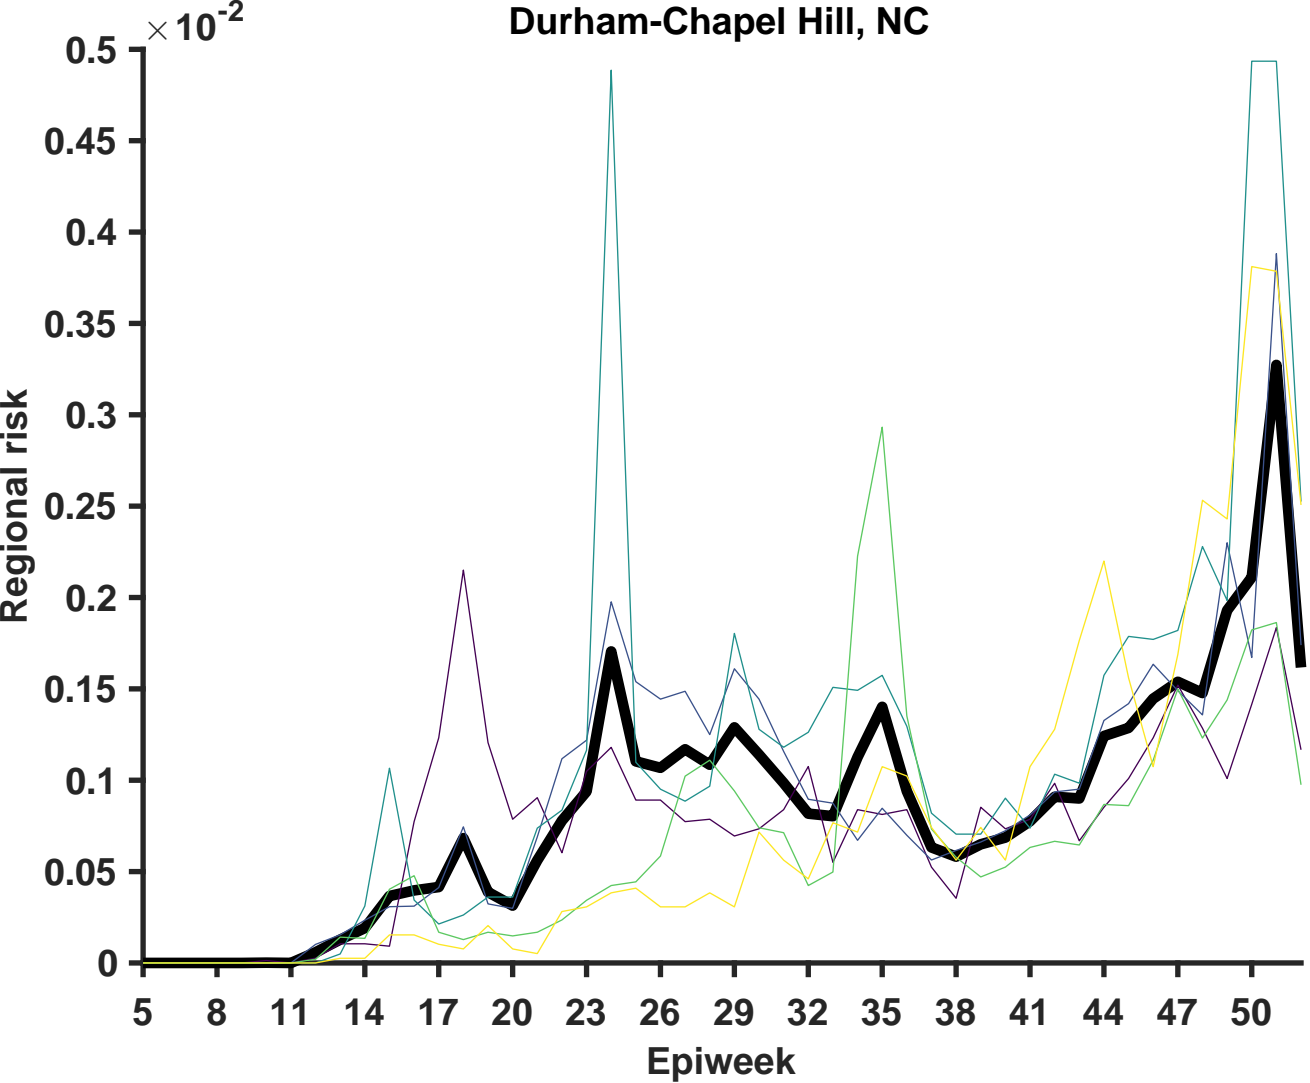

# Wichita, KS

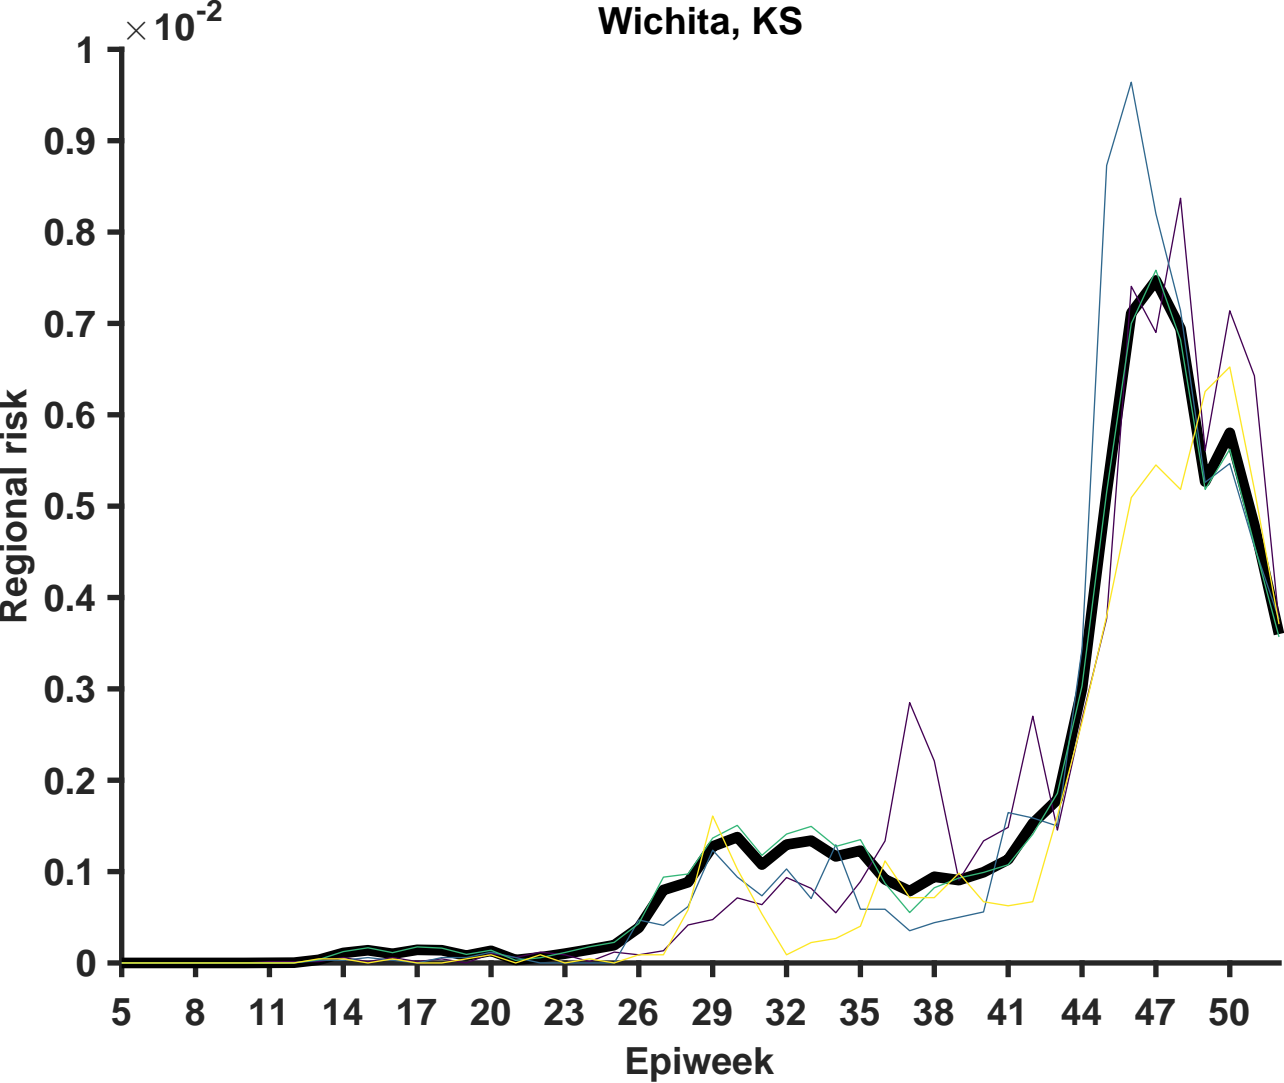

# Toledo, OH

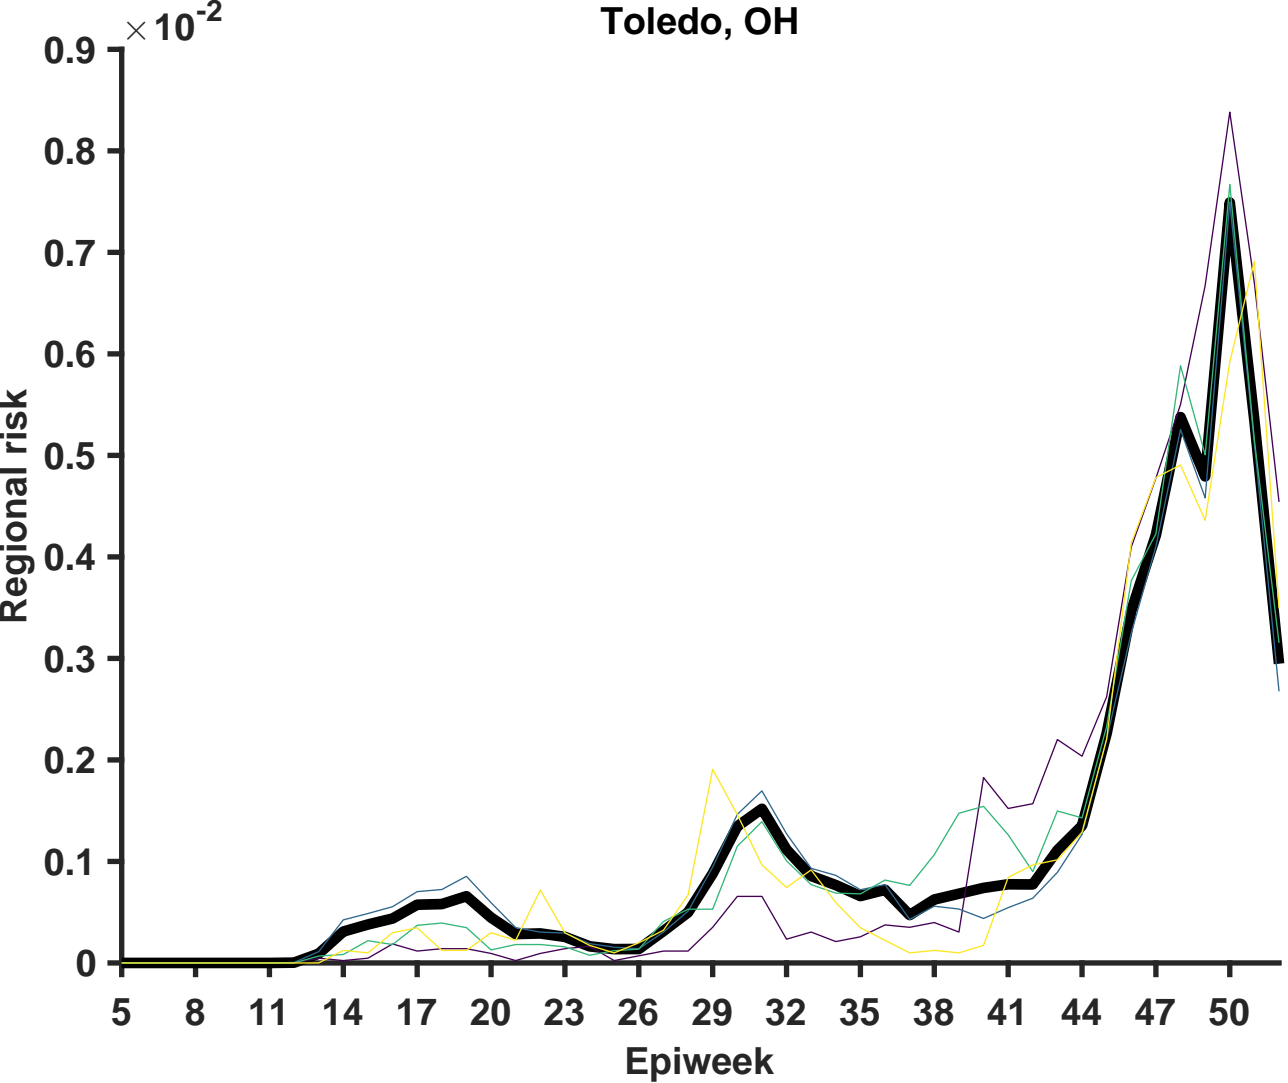

# Augusta-Richmond County, GA-SC

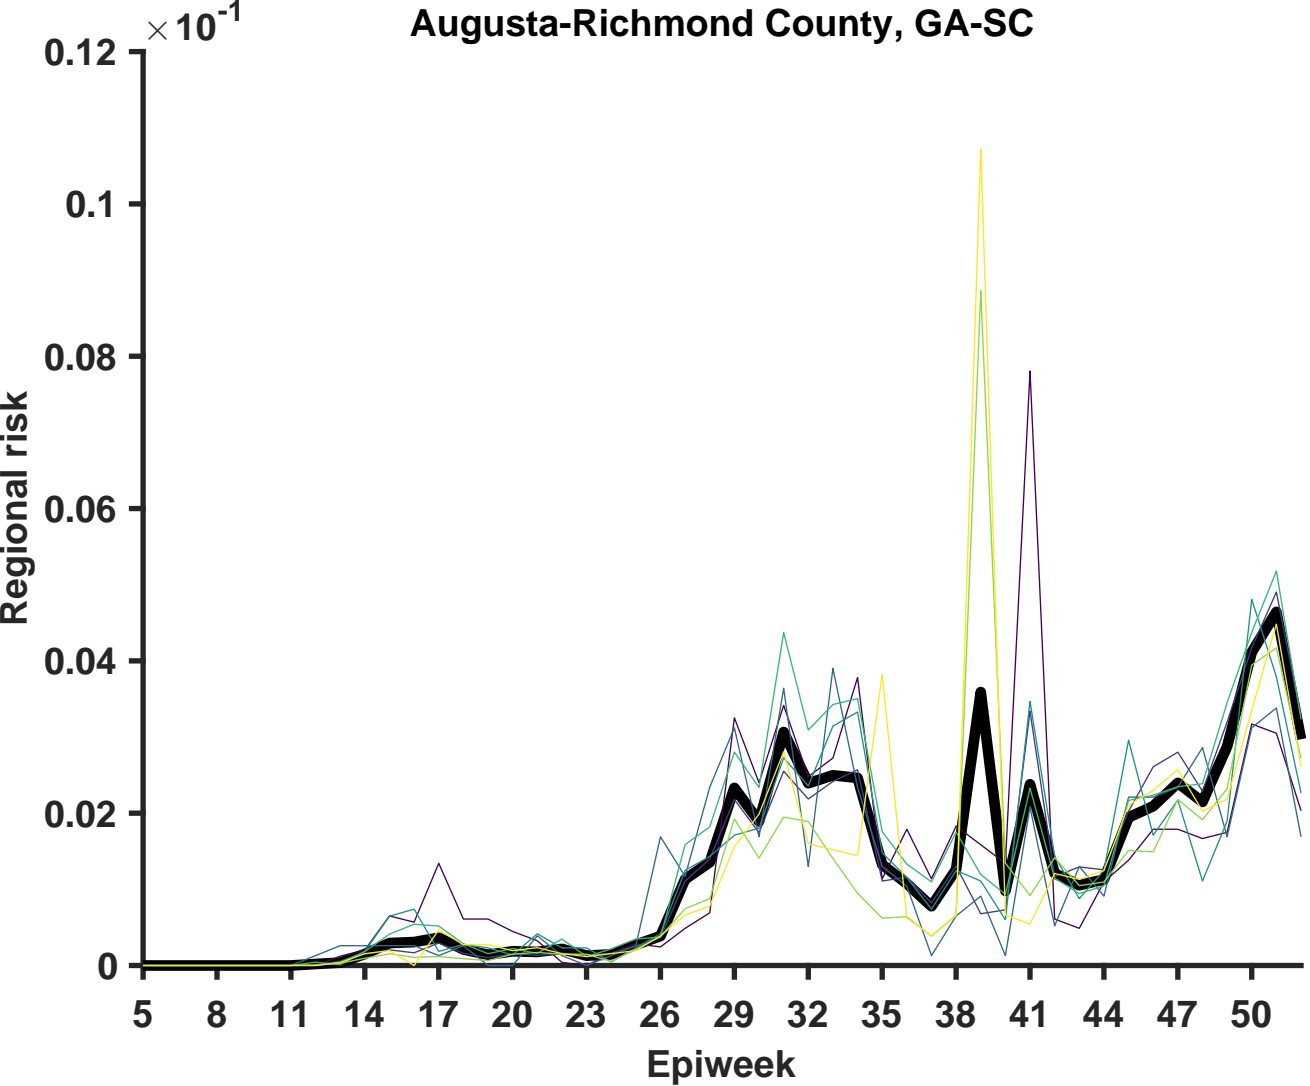

# Jackson, MS

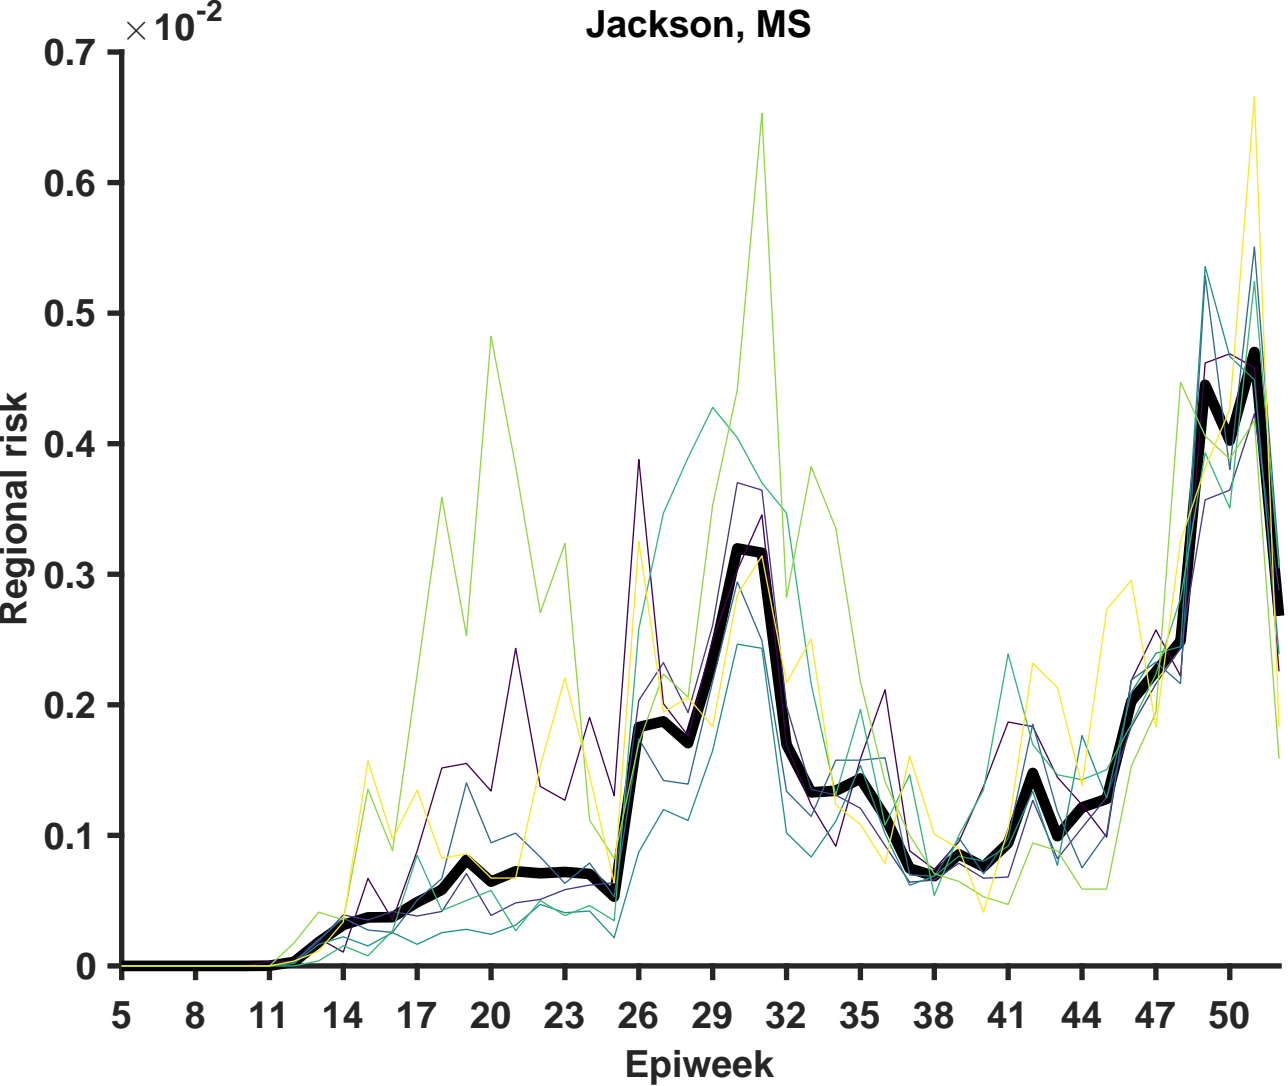

# Harrisburg-Carlisle, PA

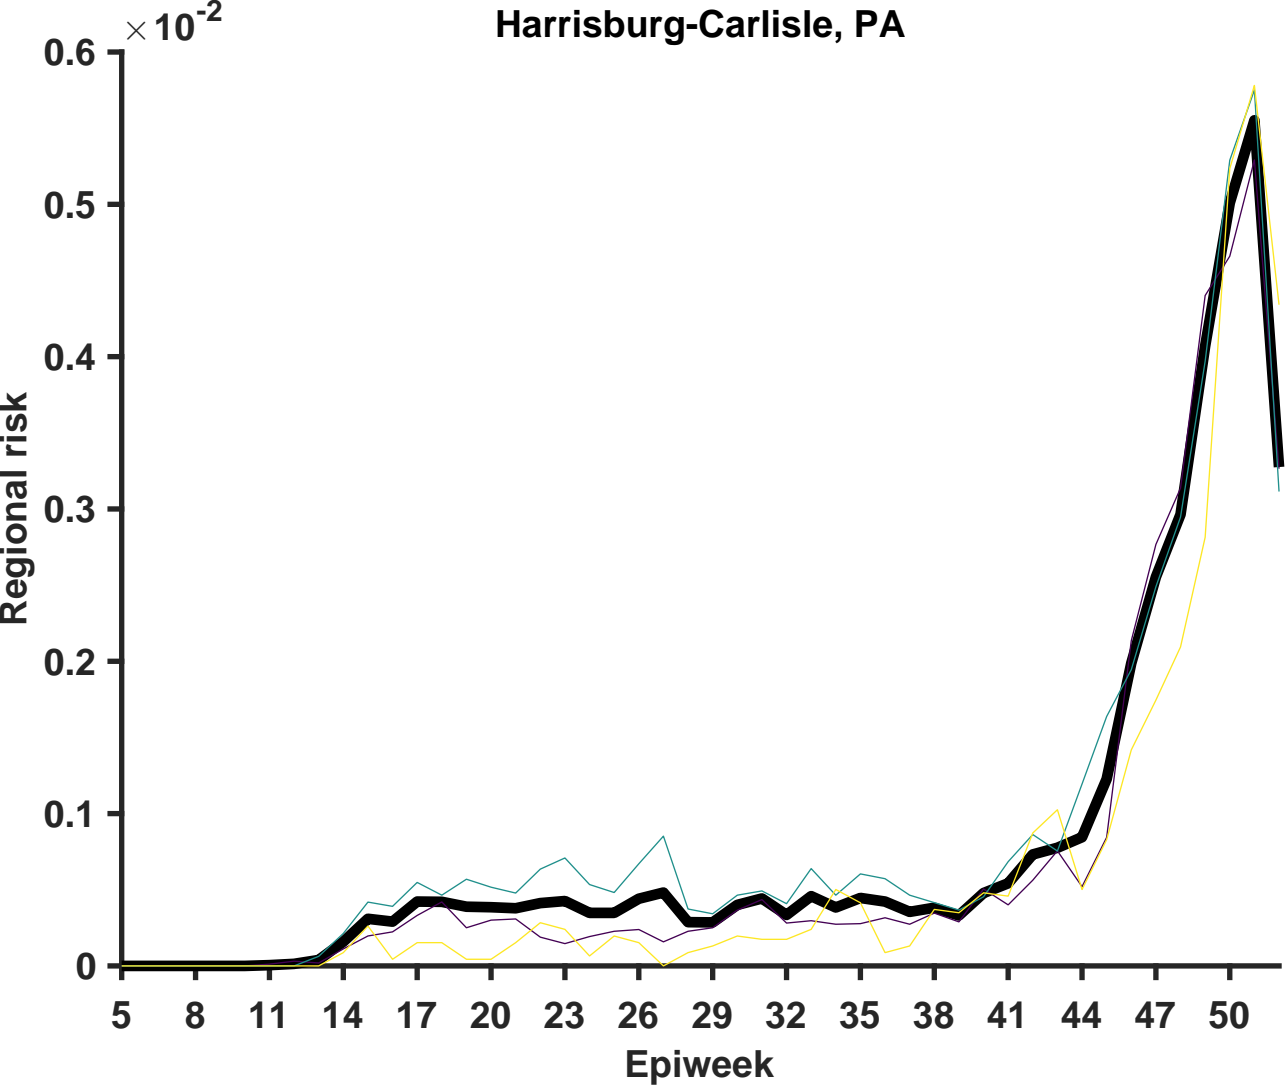



# Spokane-Spokane Valley, WA

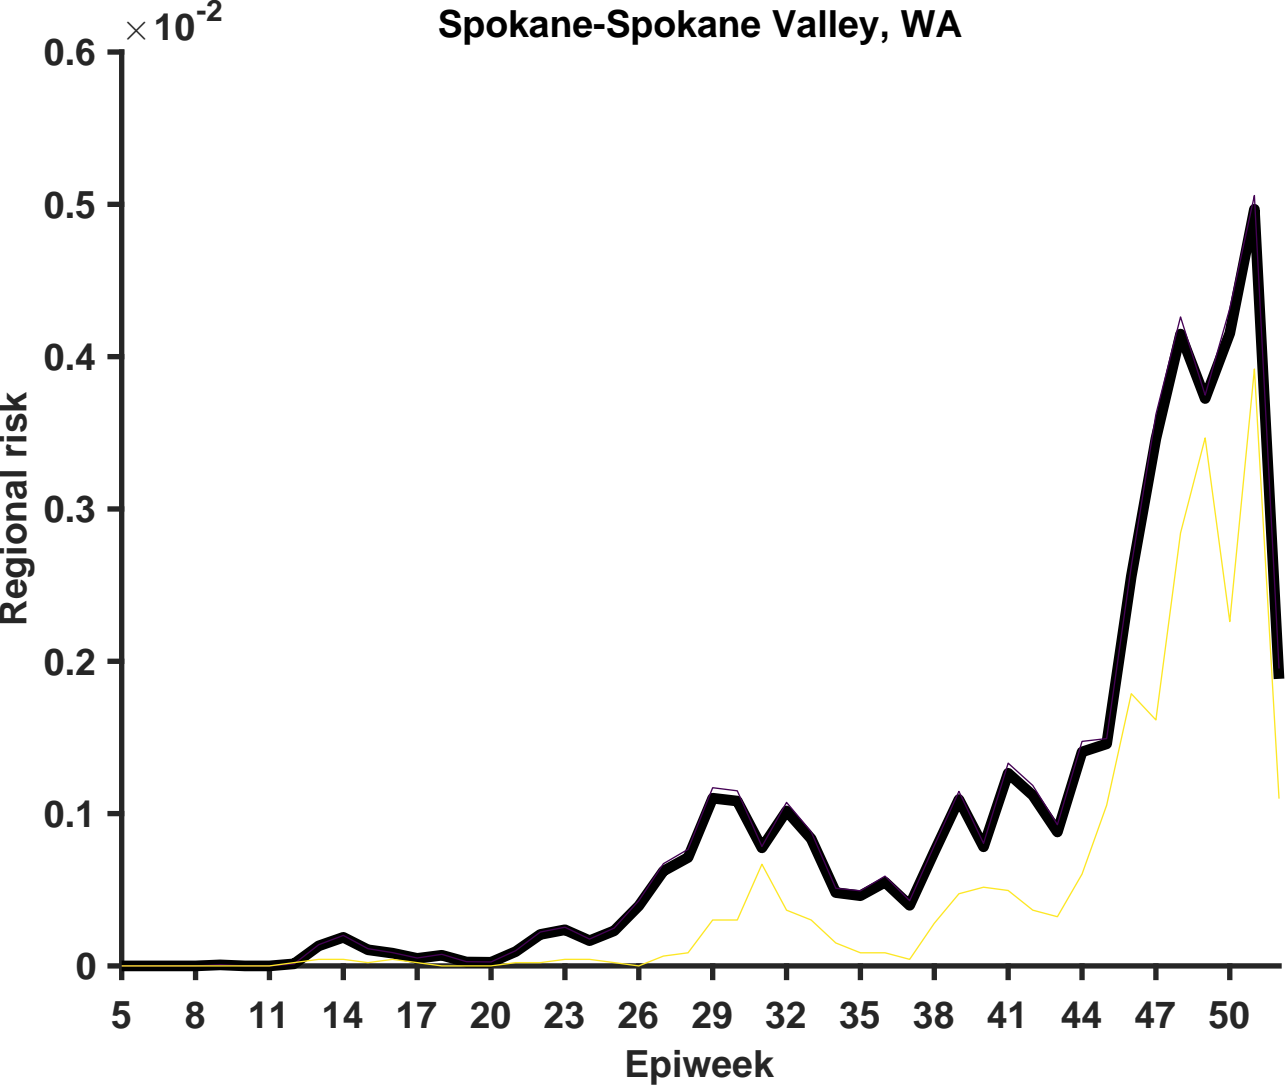

# Scranton–Wilkes-Barre, PA

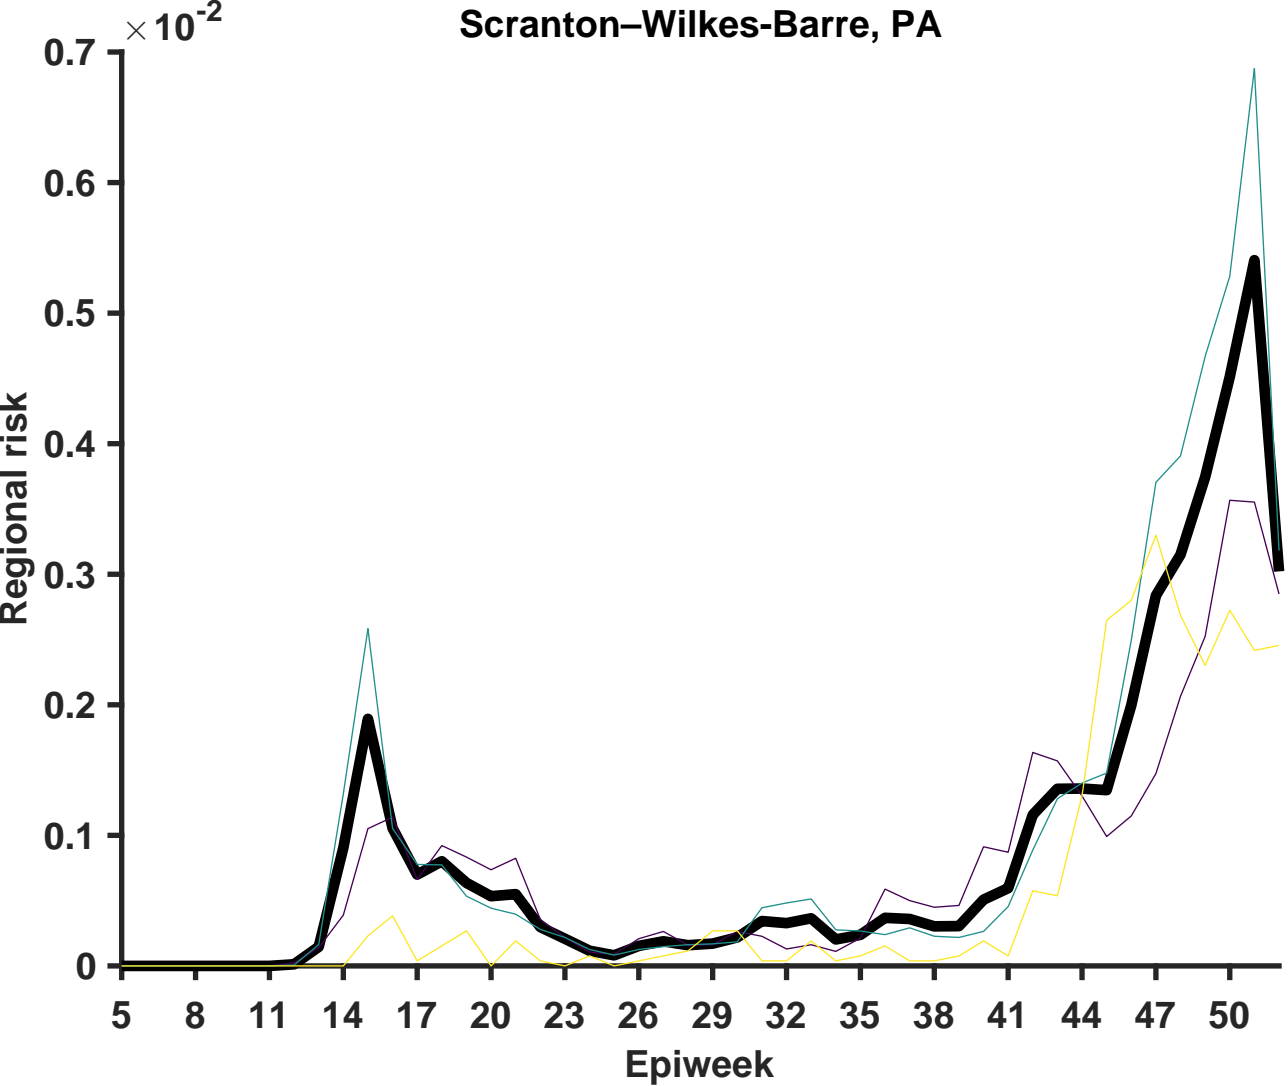

# Chattanooga, TN-GA

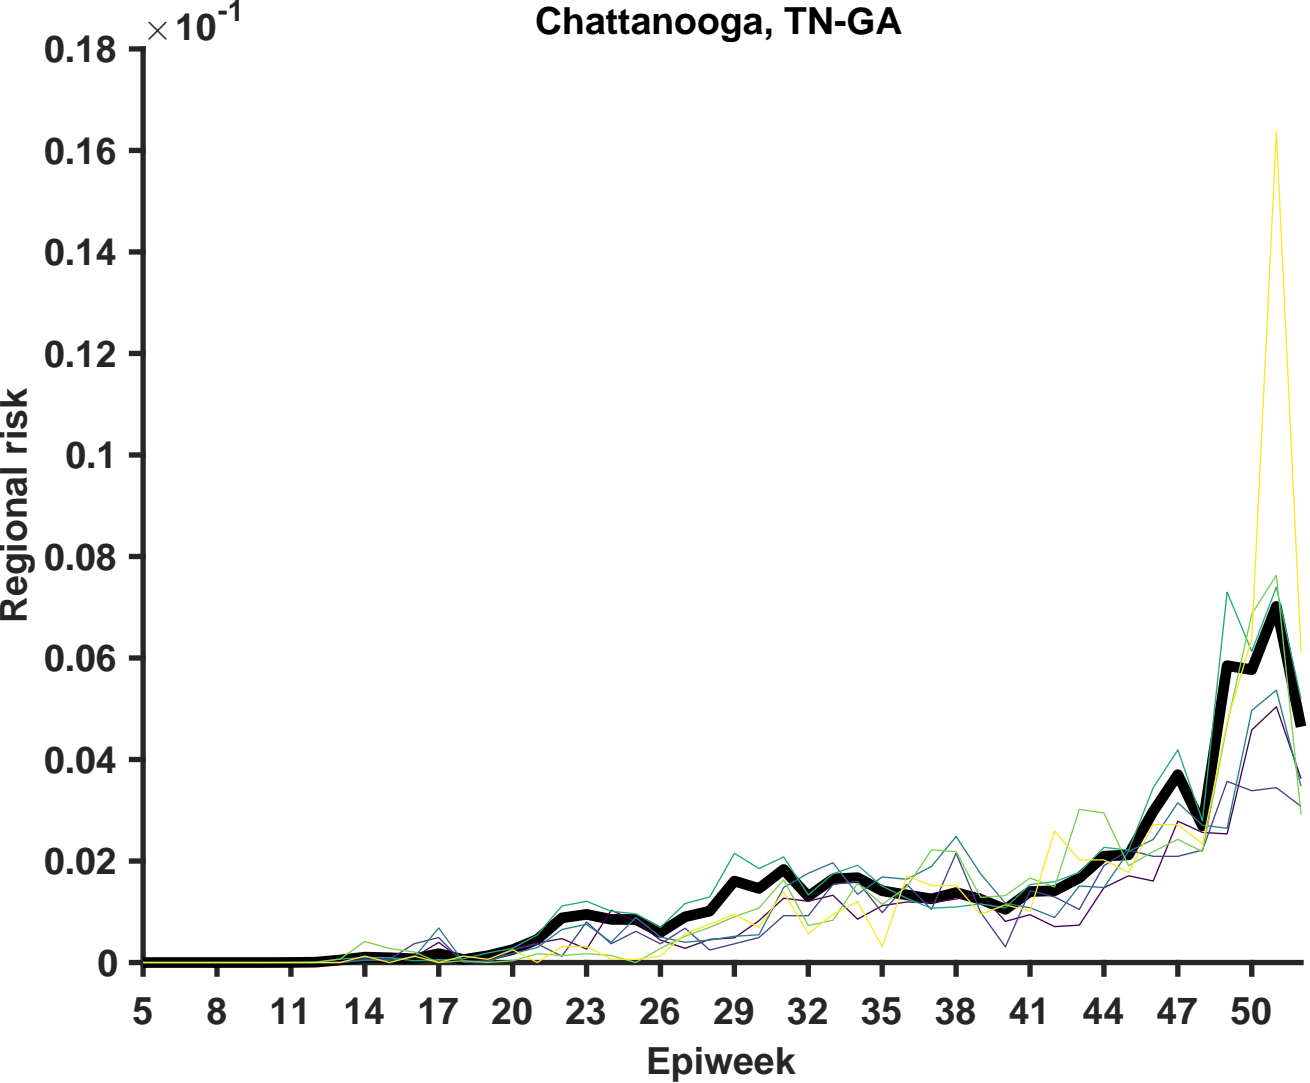

# Portland-South Portland, ME

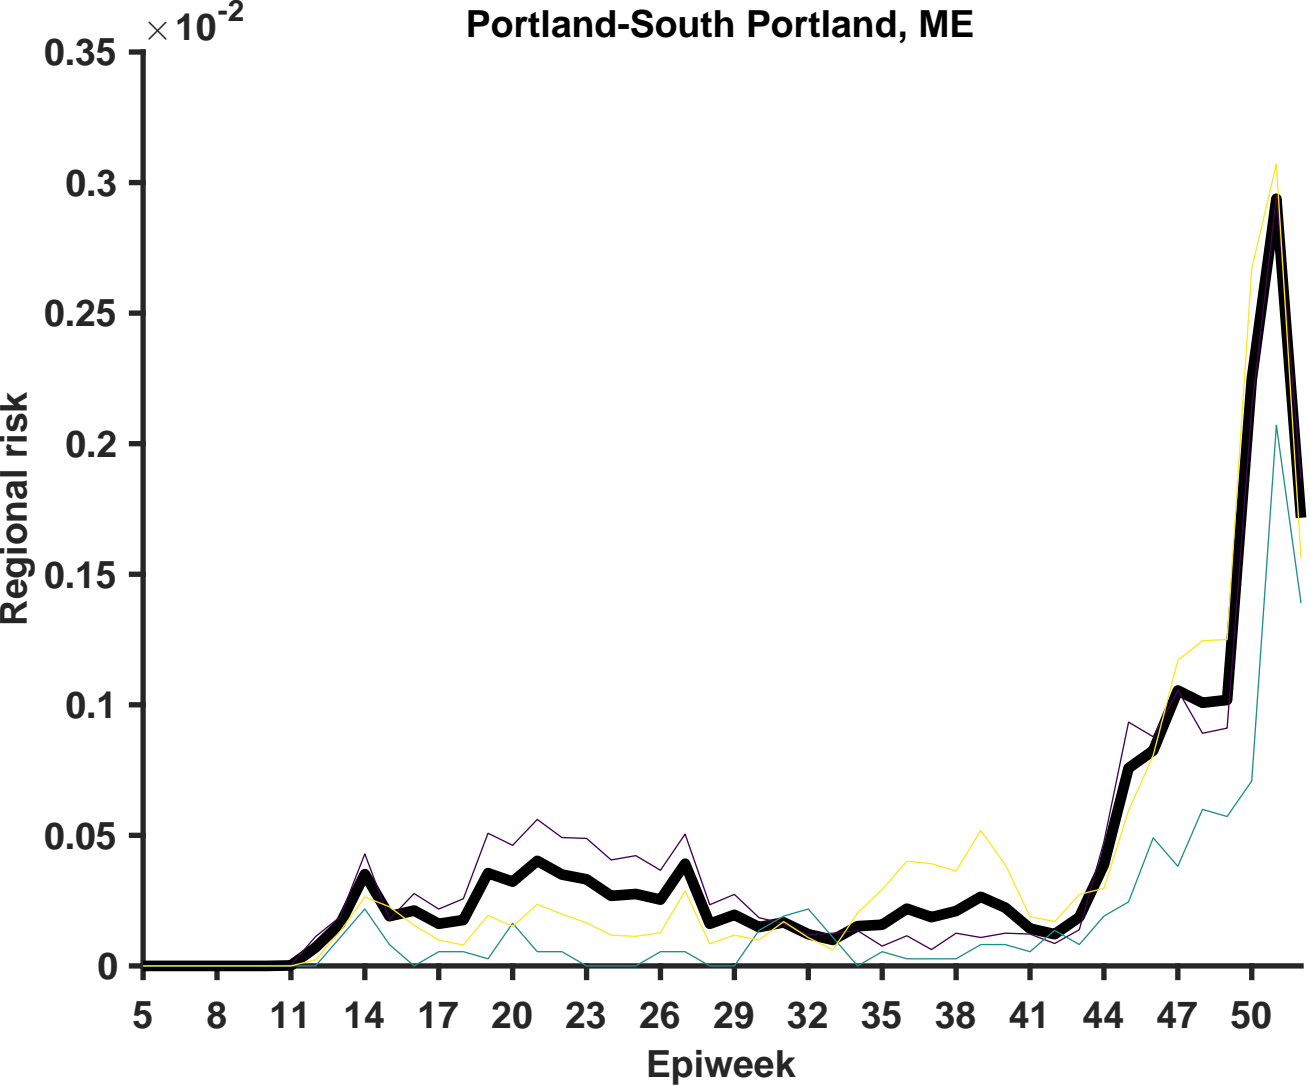

# Fayetteville-Springdale-Rogers, AR

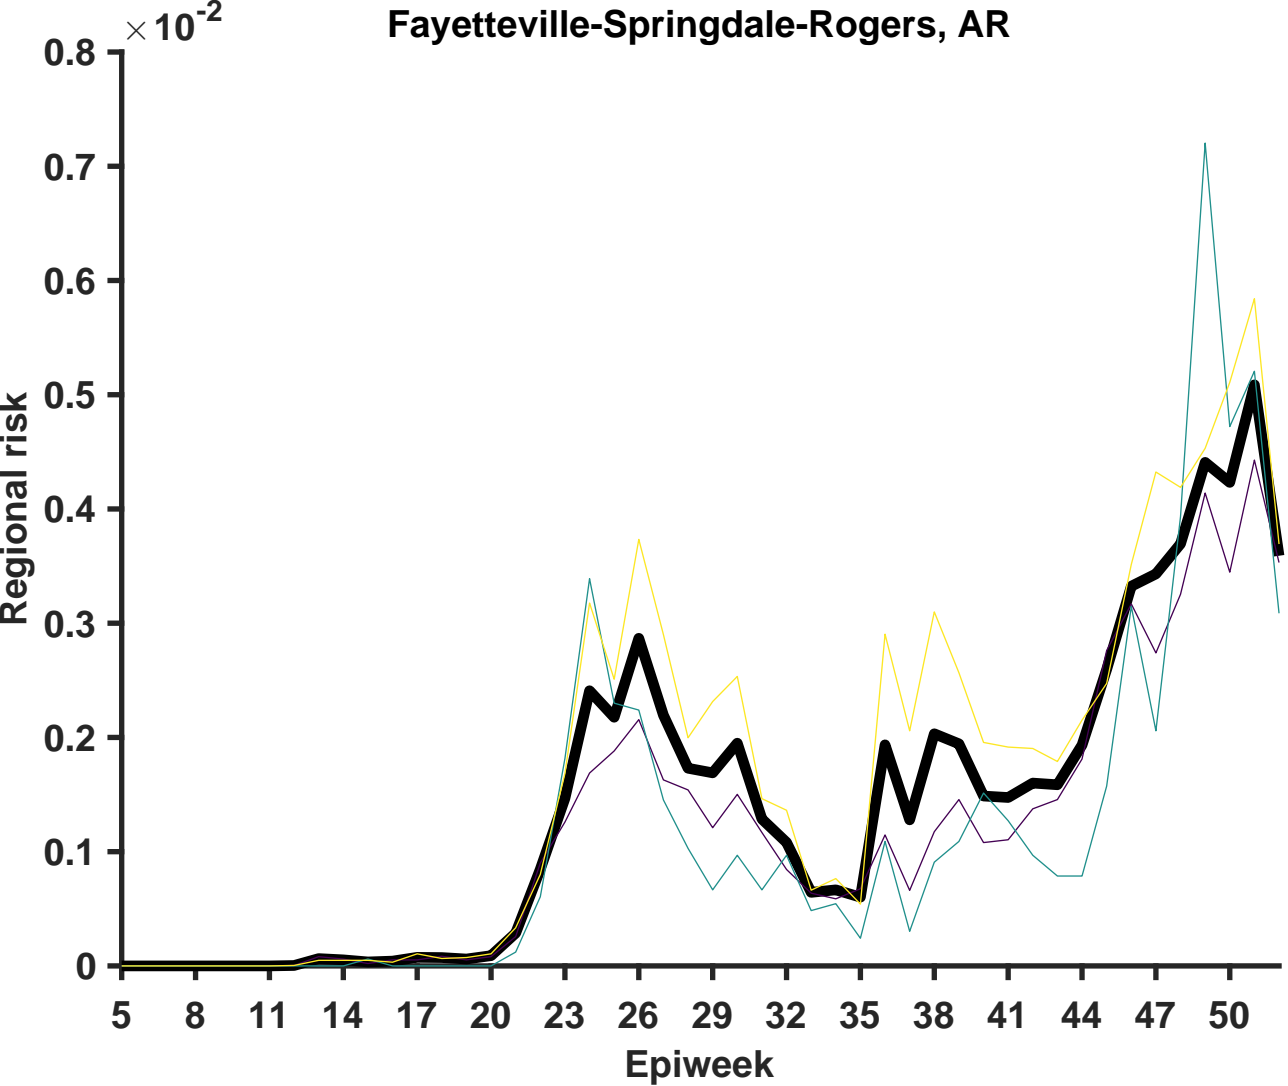

# Lansing-East Lansing, MI

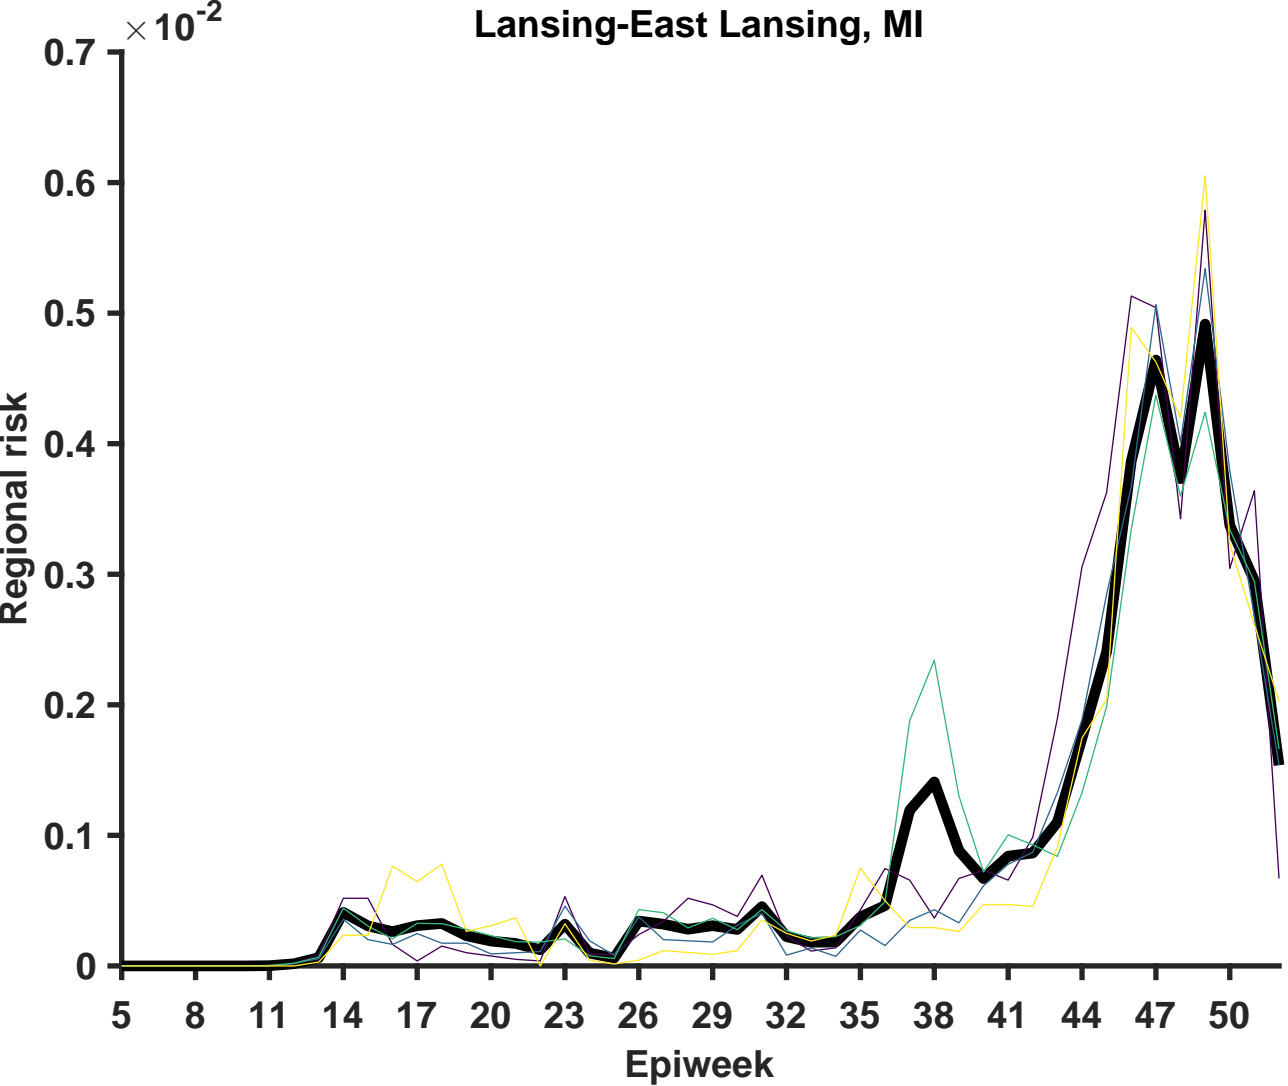

# Youngstown-Warren-Boardman, OH-PA

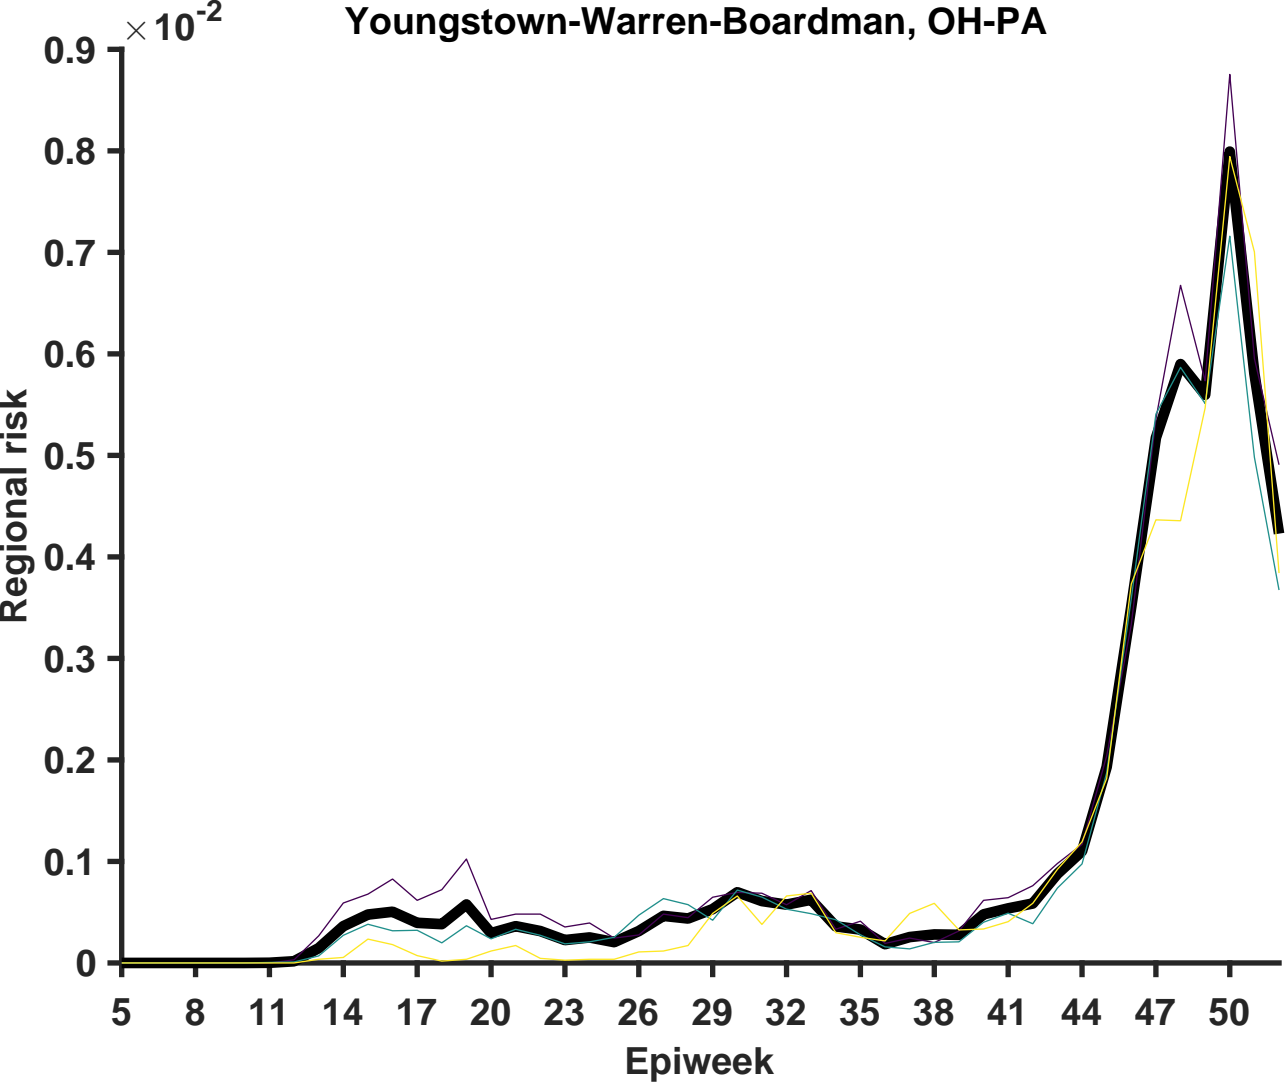

# Fayetteville, NC

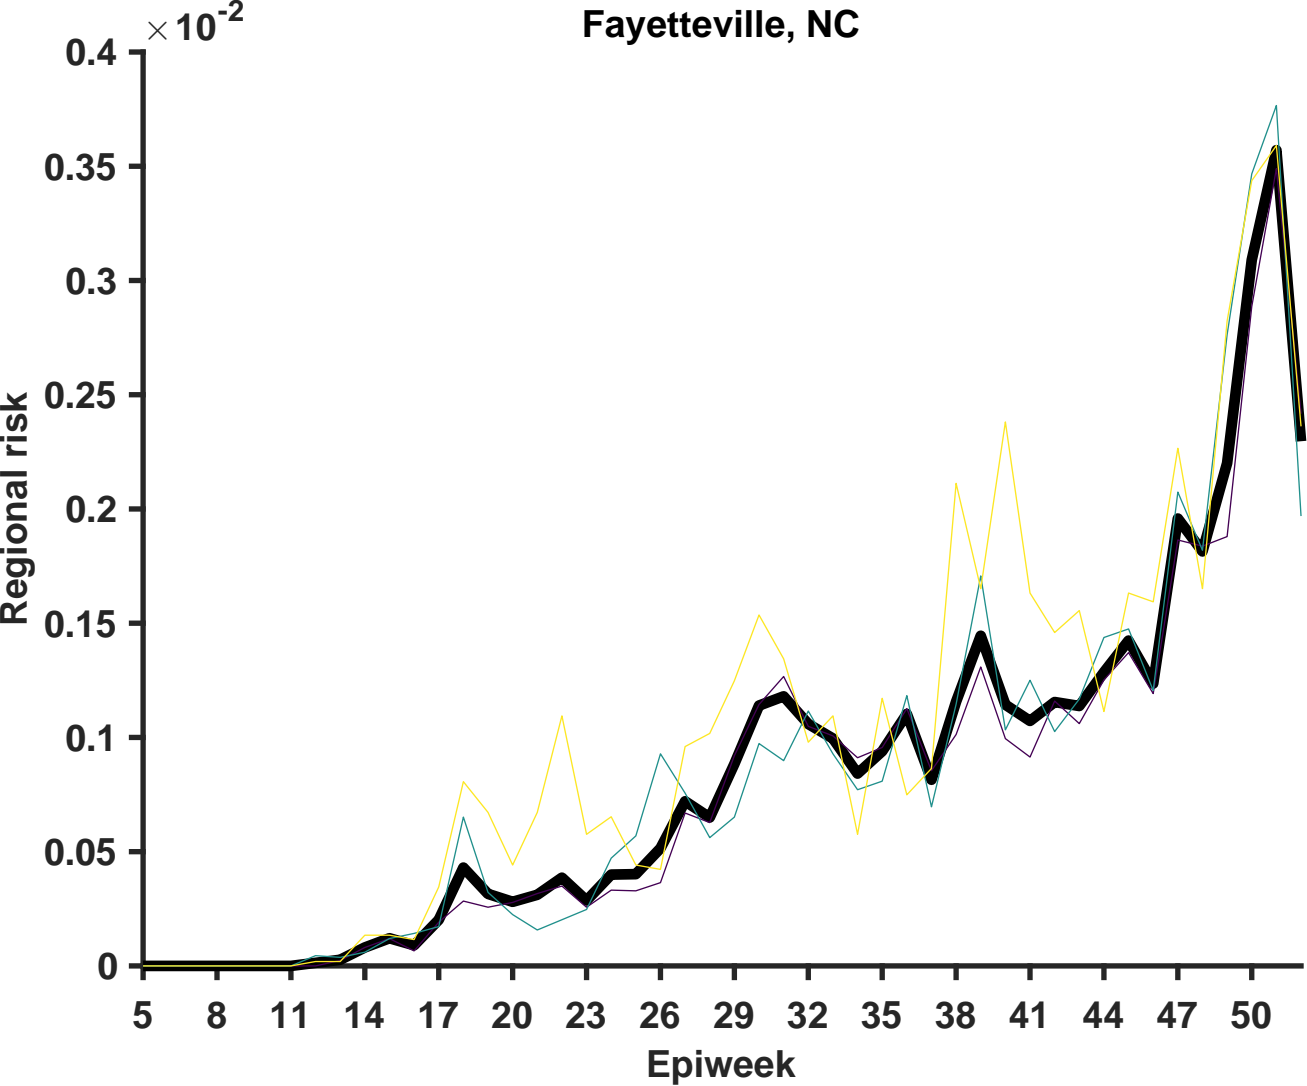



# Lexington-Fayette, KY

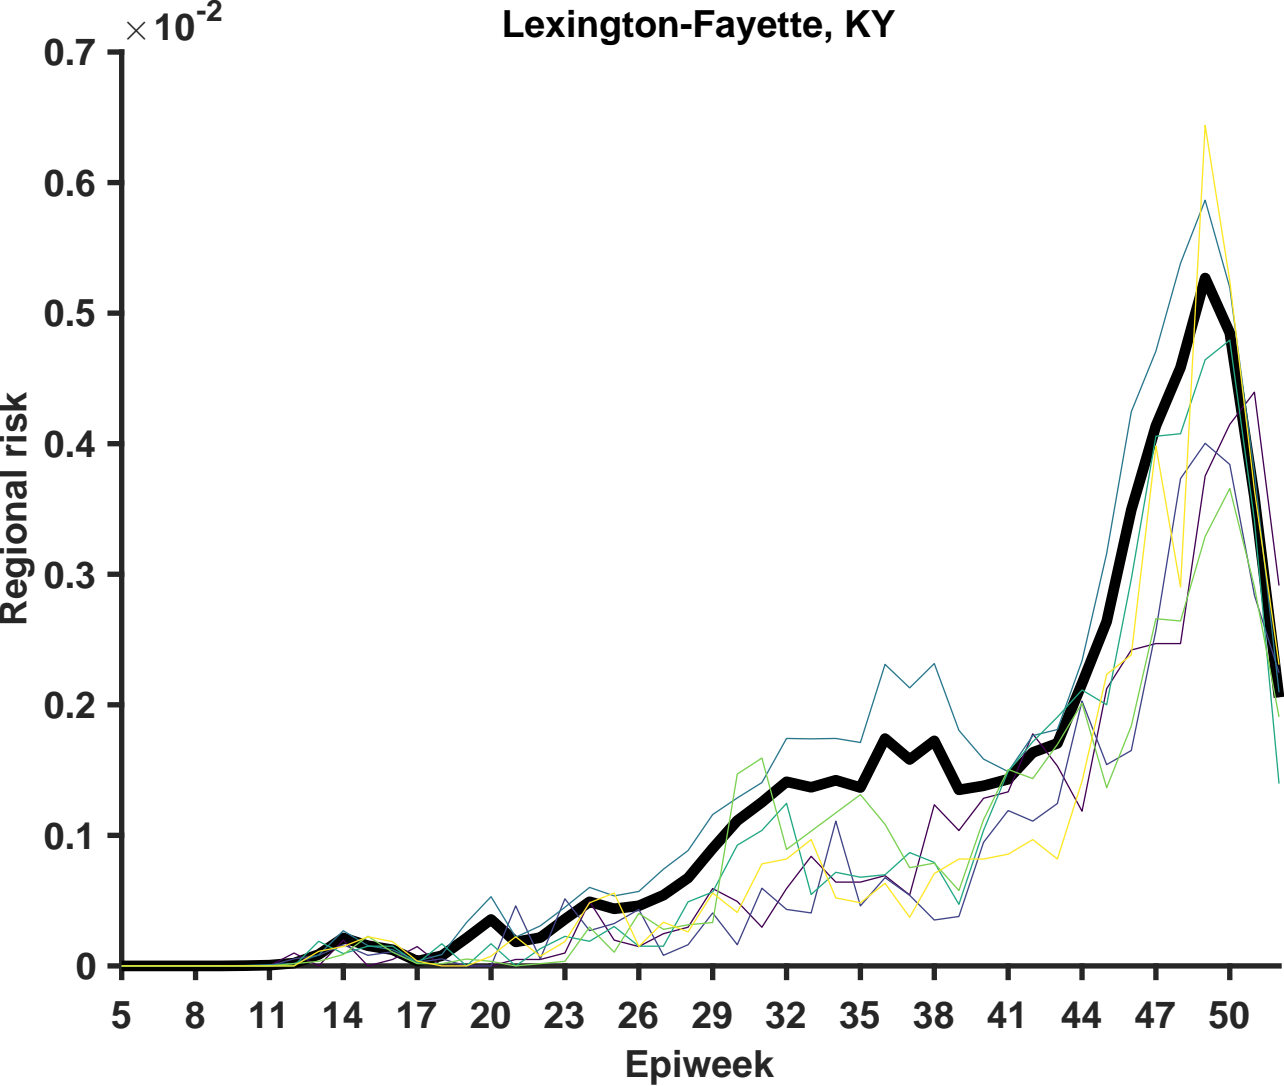

# Pensacola-Ferry Pass-Brent, FL

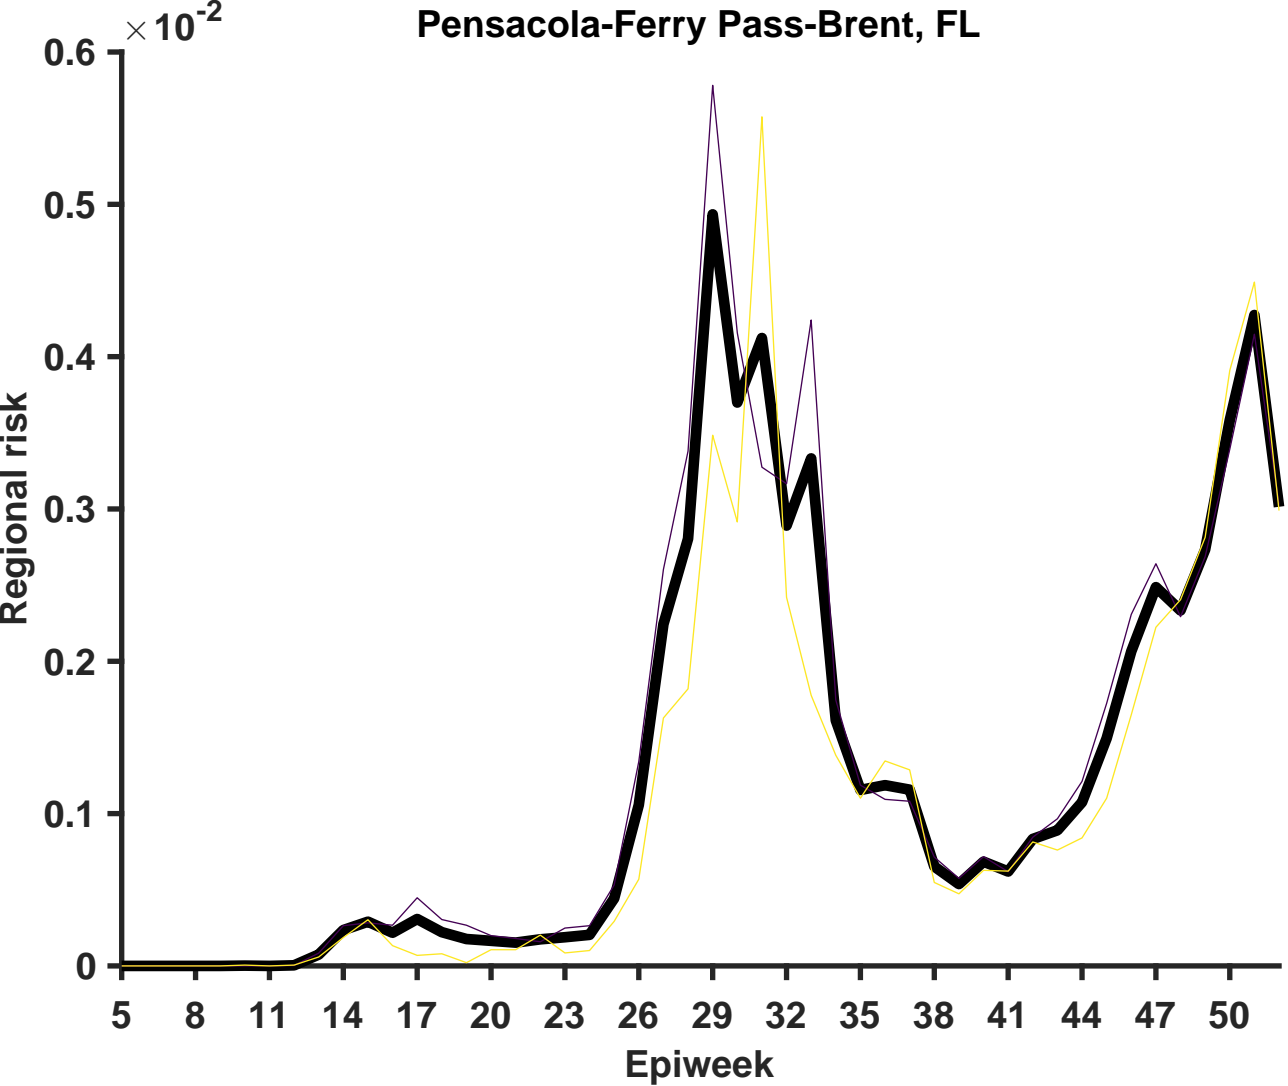

# Huntsville, AL

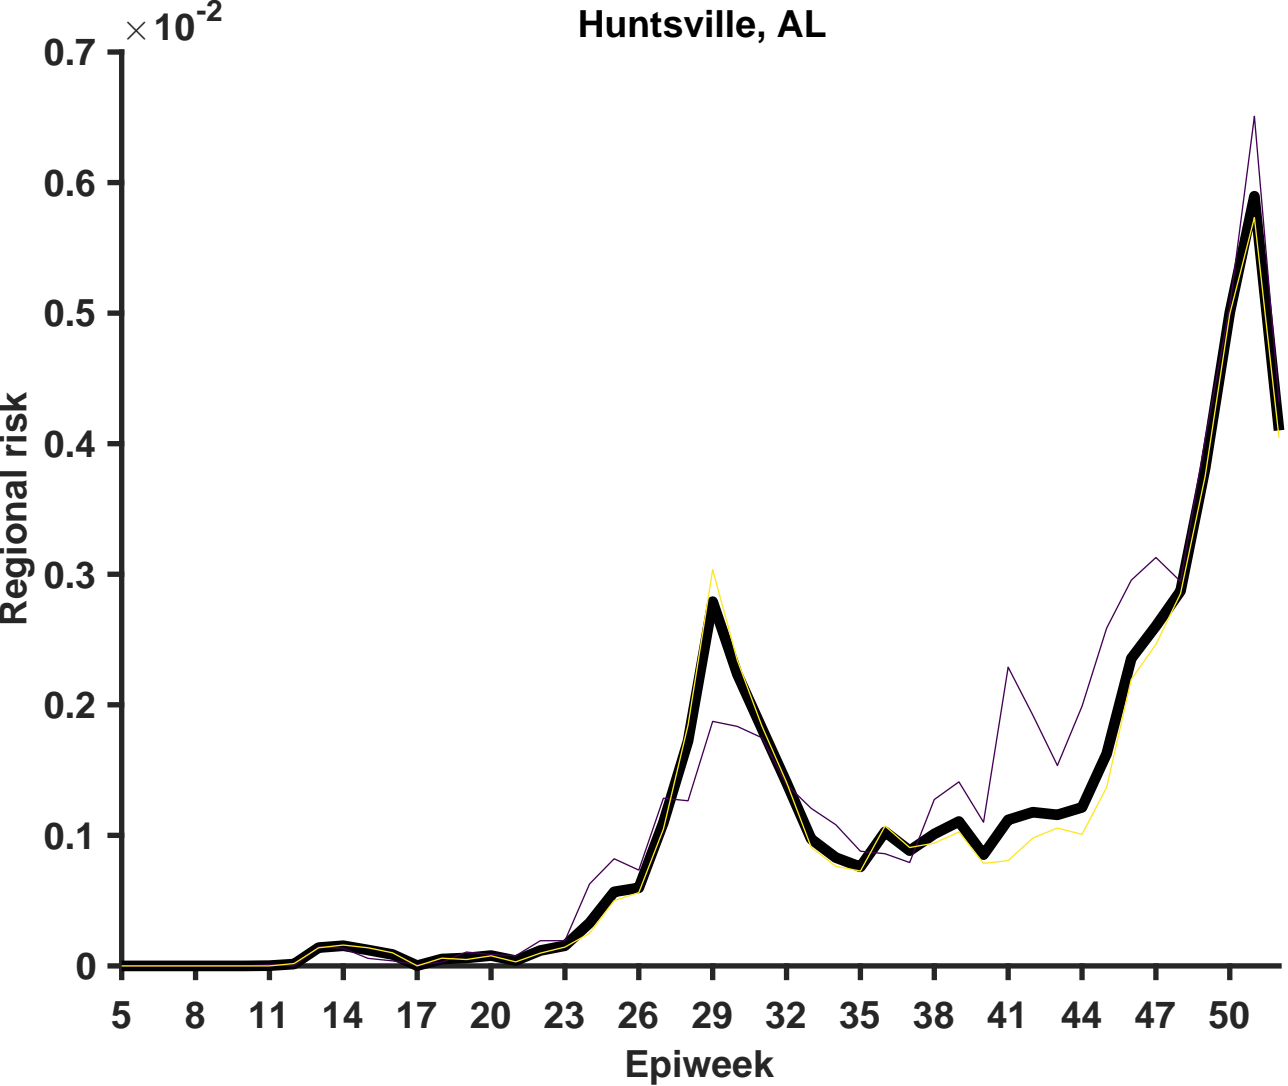

# Reno, NV

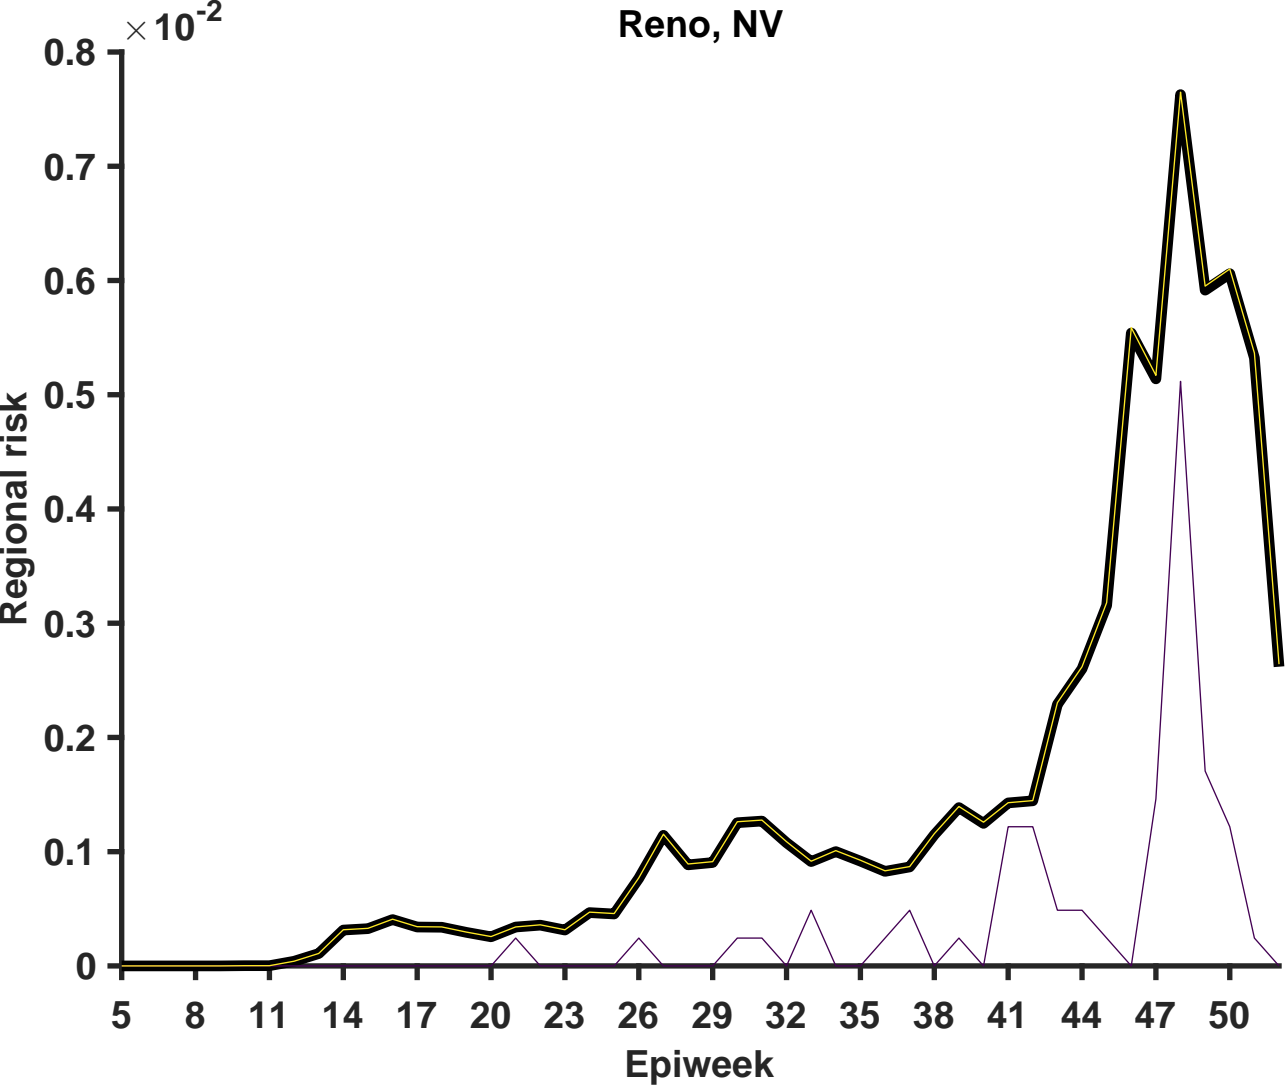

# Myrtle Beach-Conway-North Myrtle Beach, SC-NC

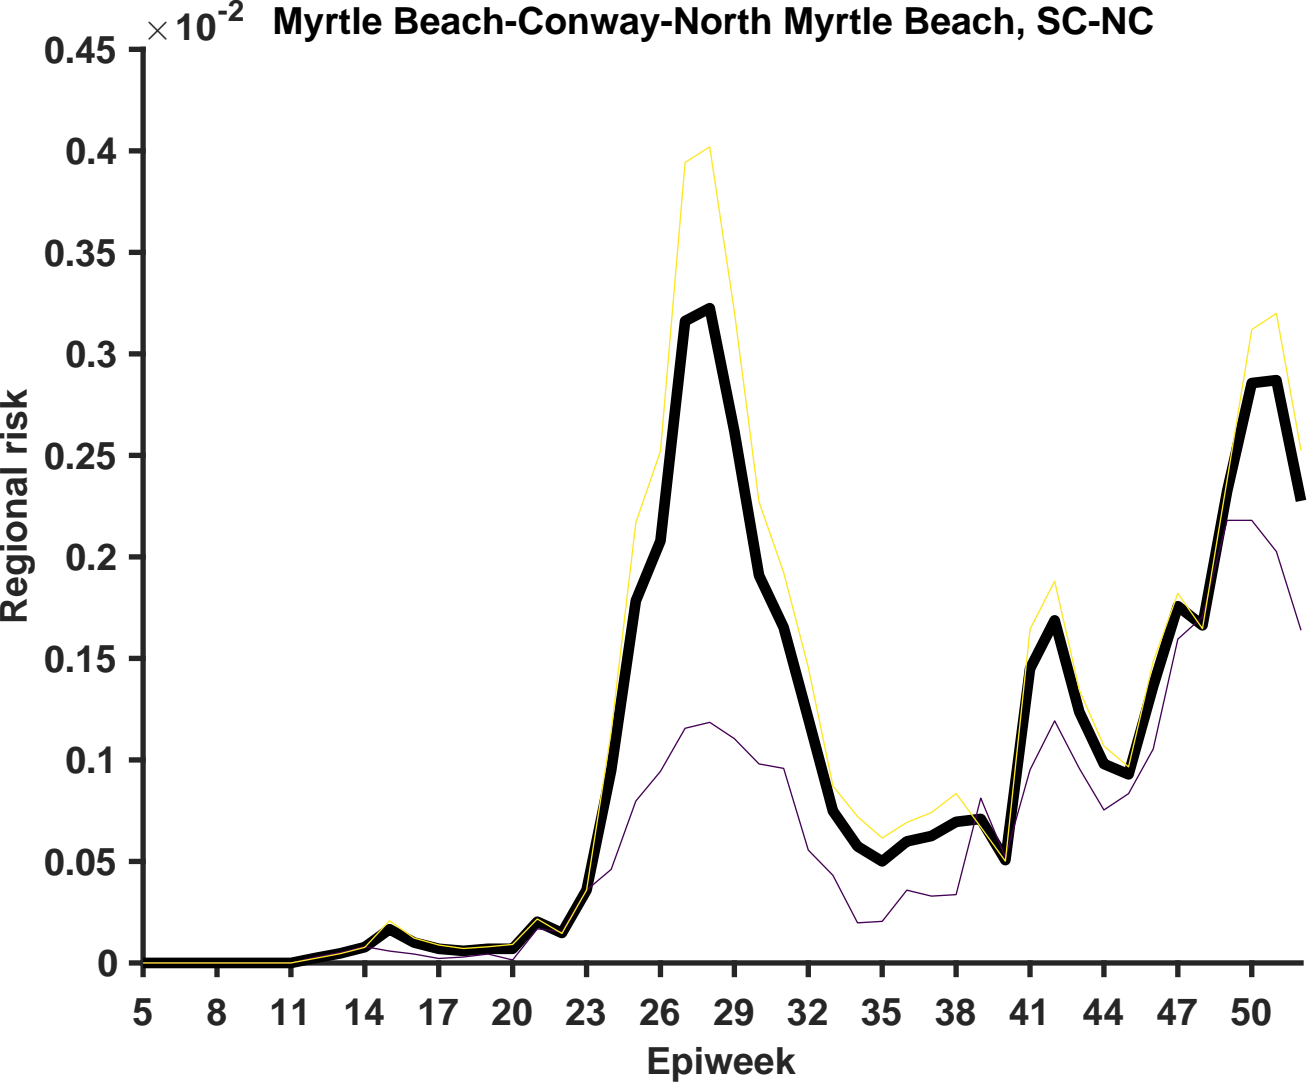

# Port St. Lucie, FL

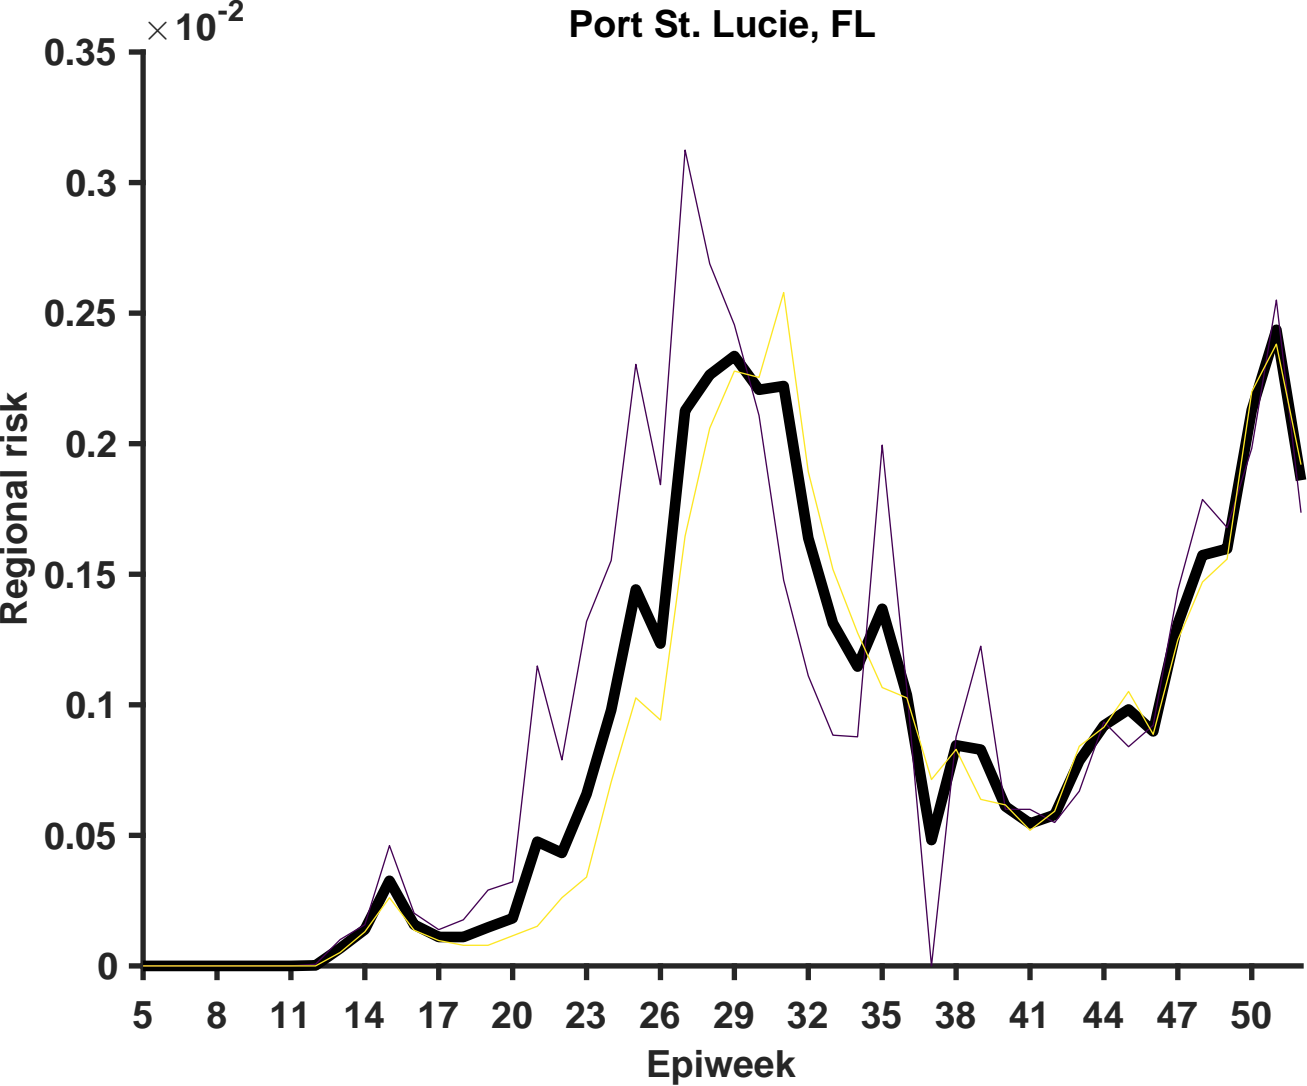

# Lafayette, LA

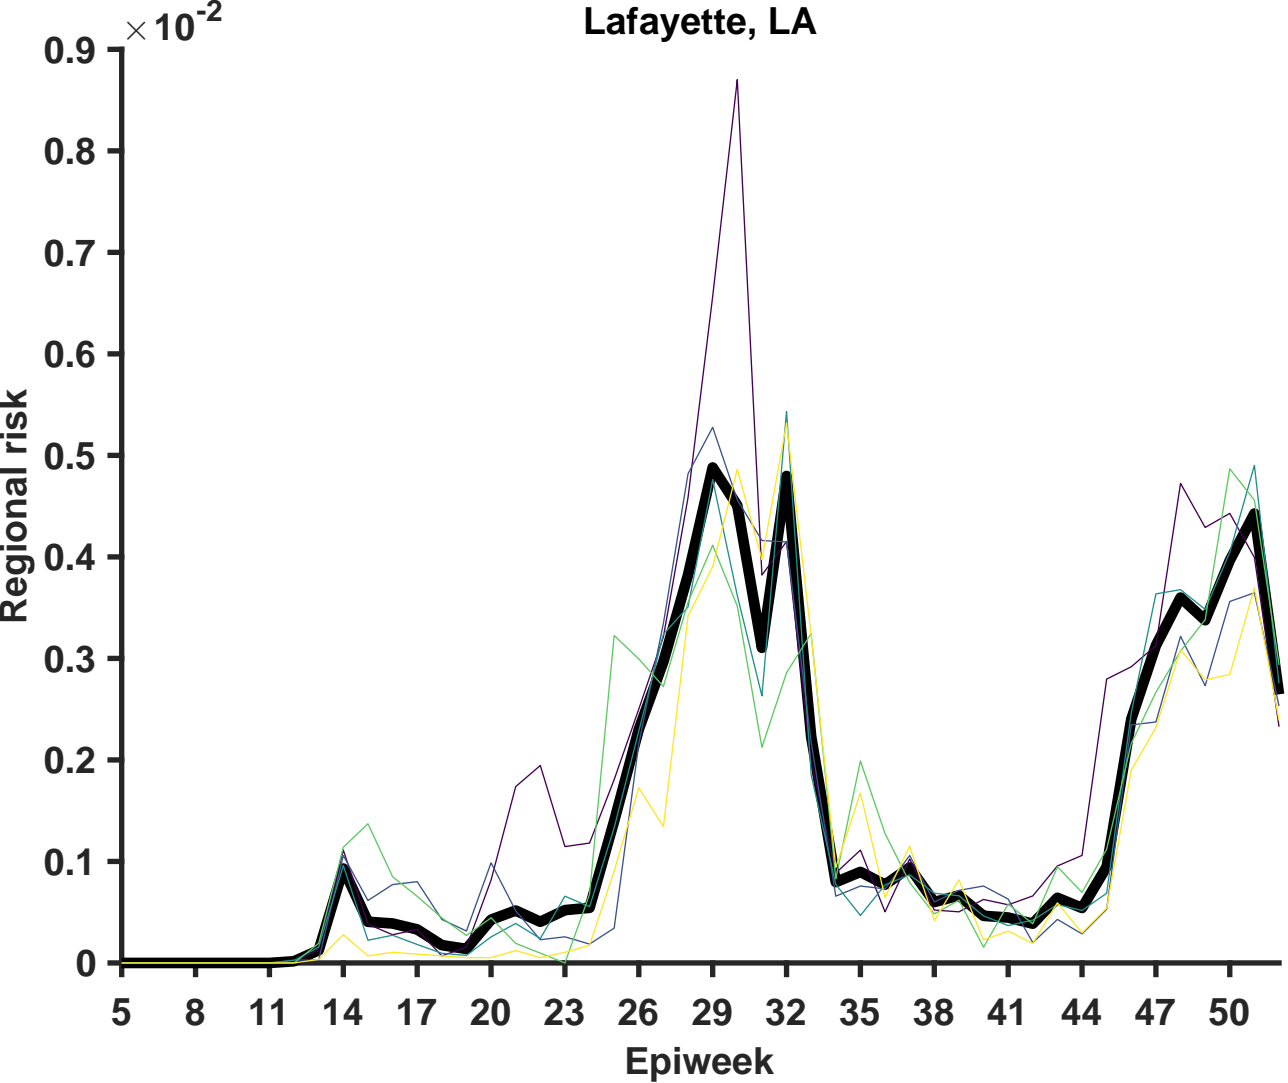

# Springfield, MO

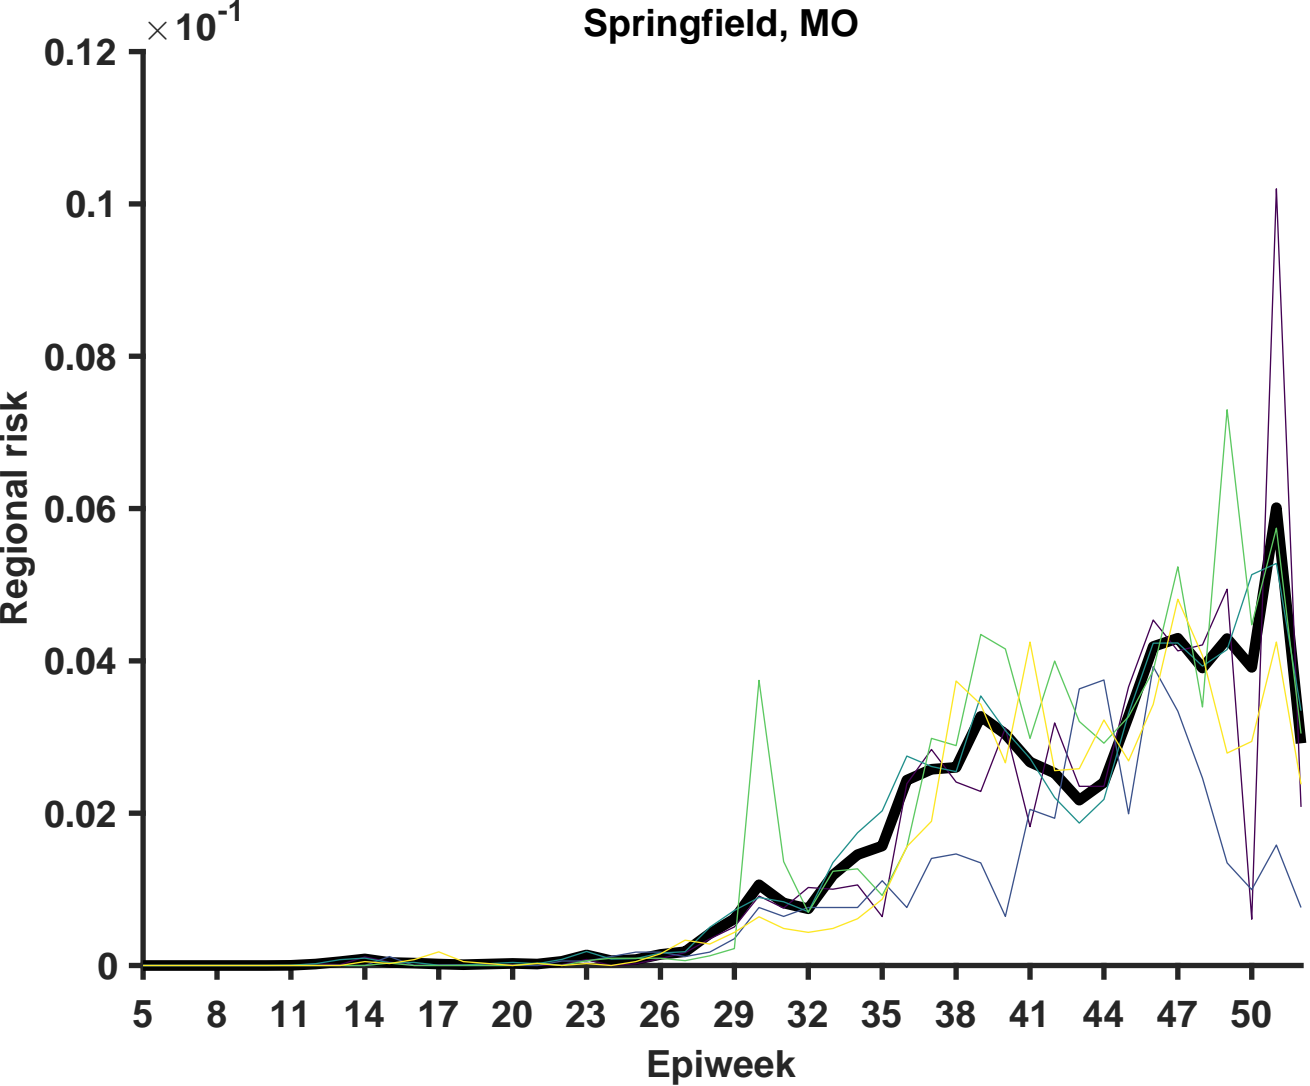



# Killeen-Temple, TX

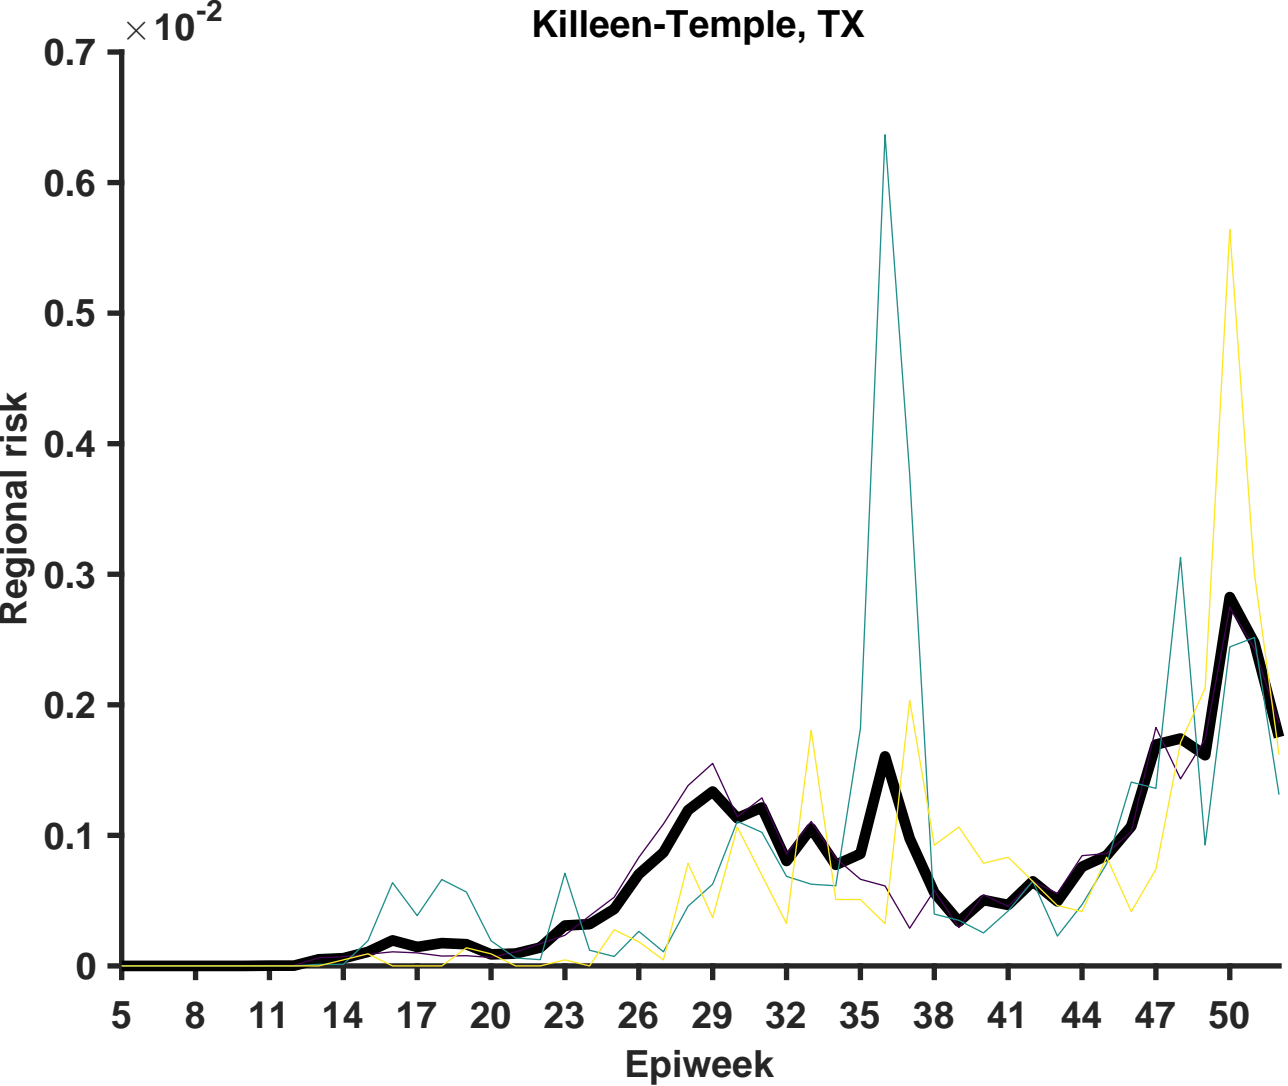

# Asheville, NC

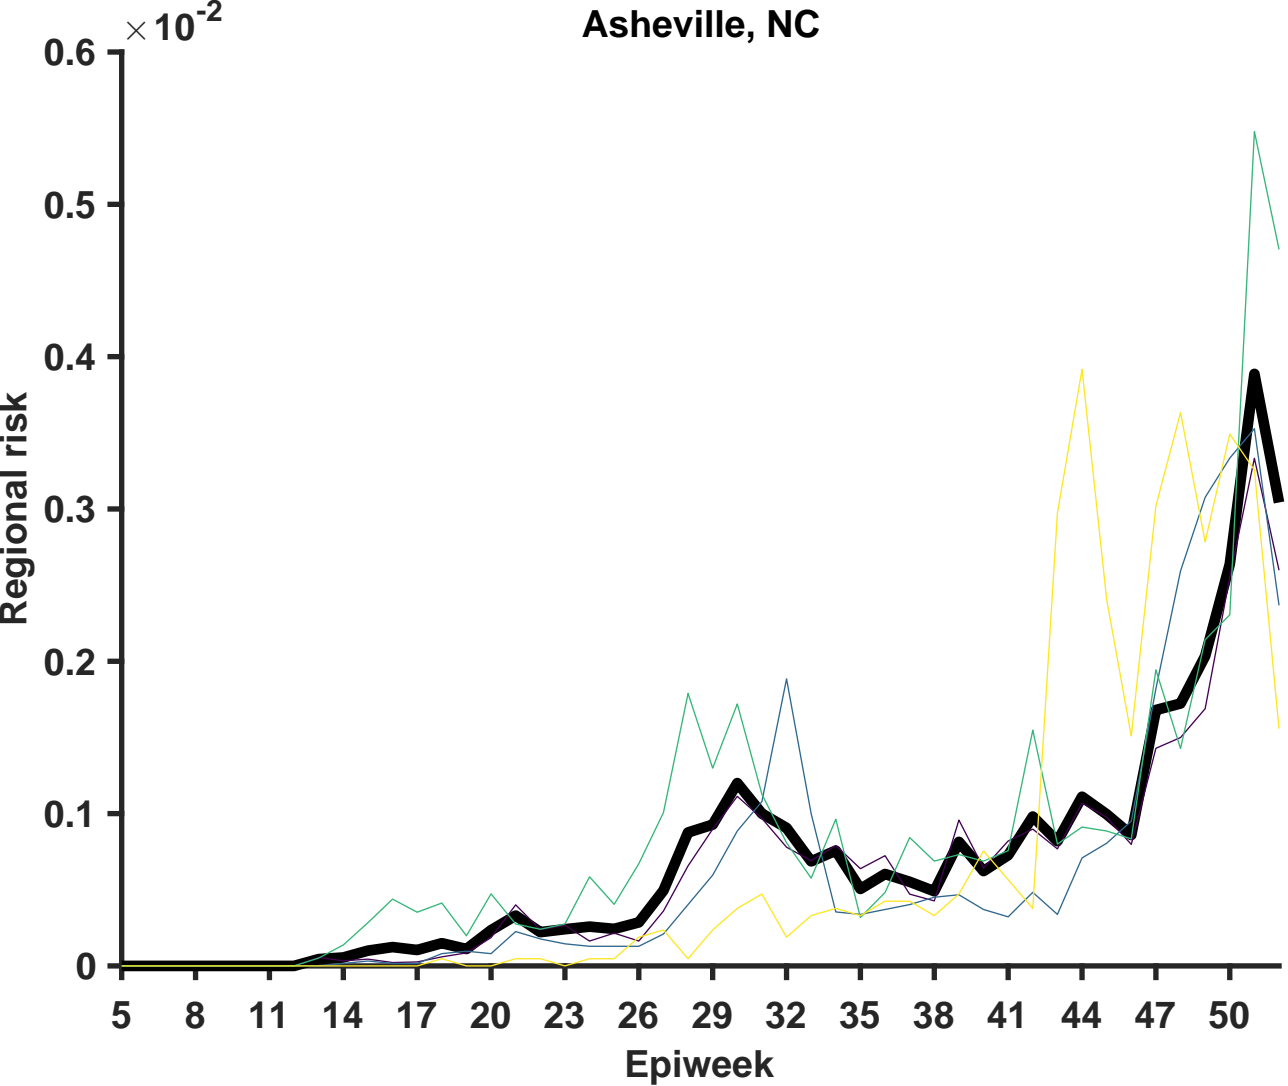

# Salem, OR

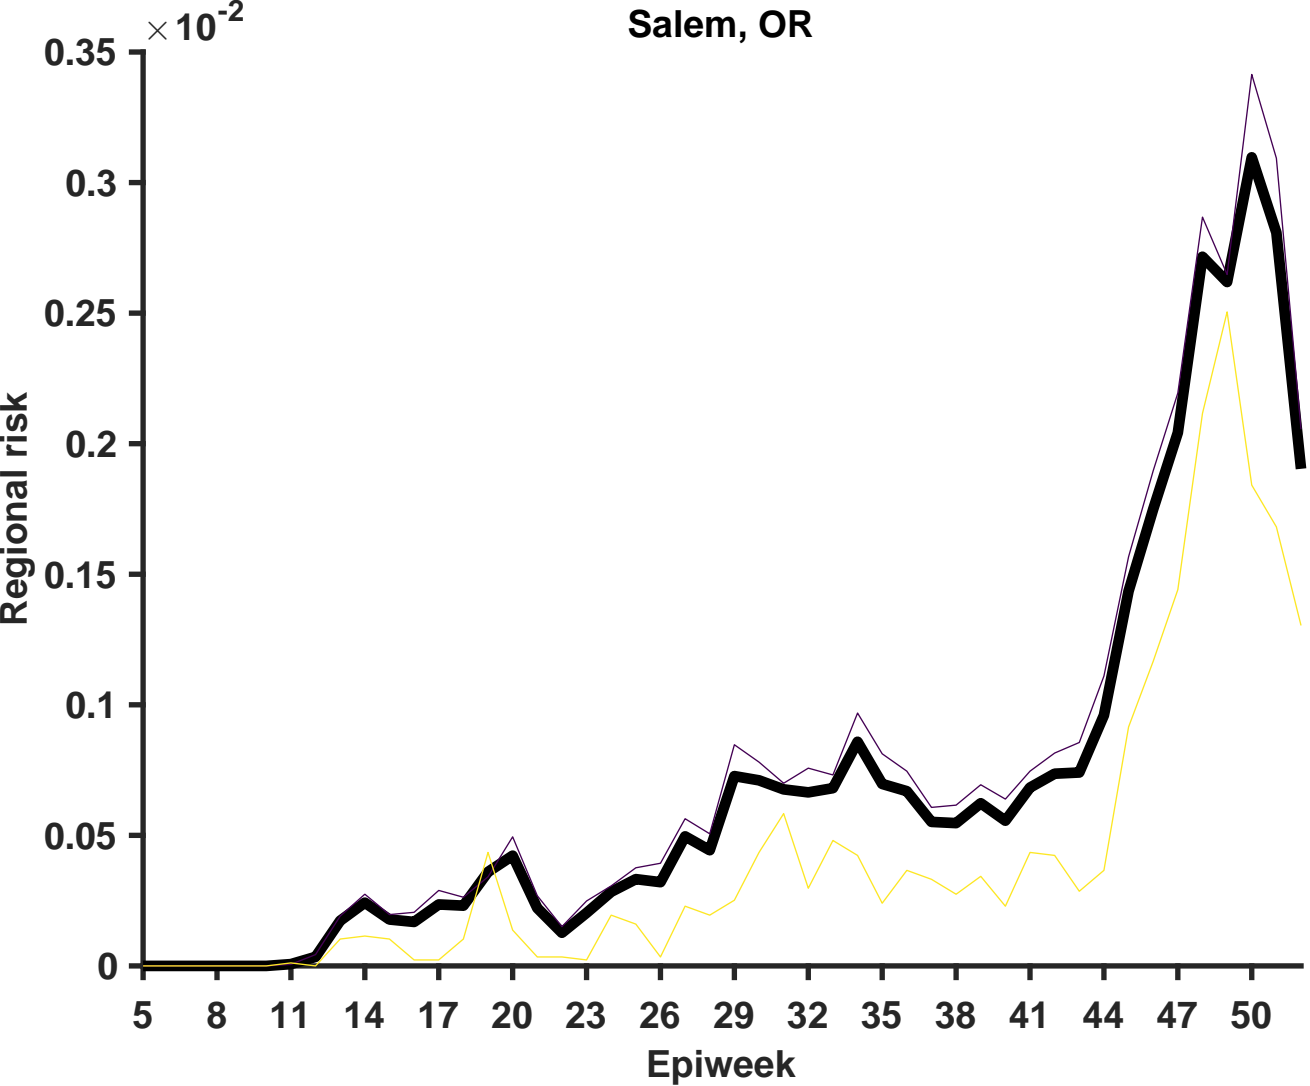

# Mobile, AL

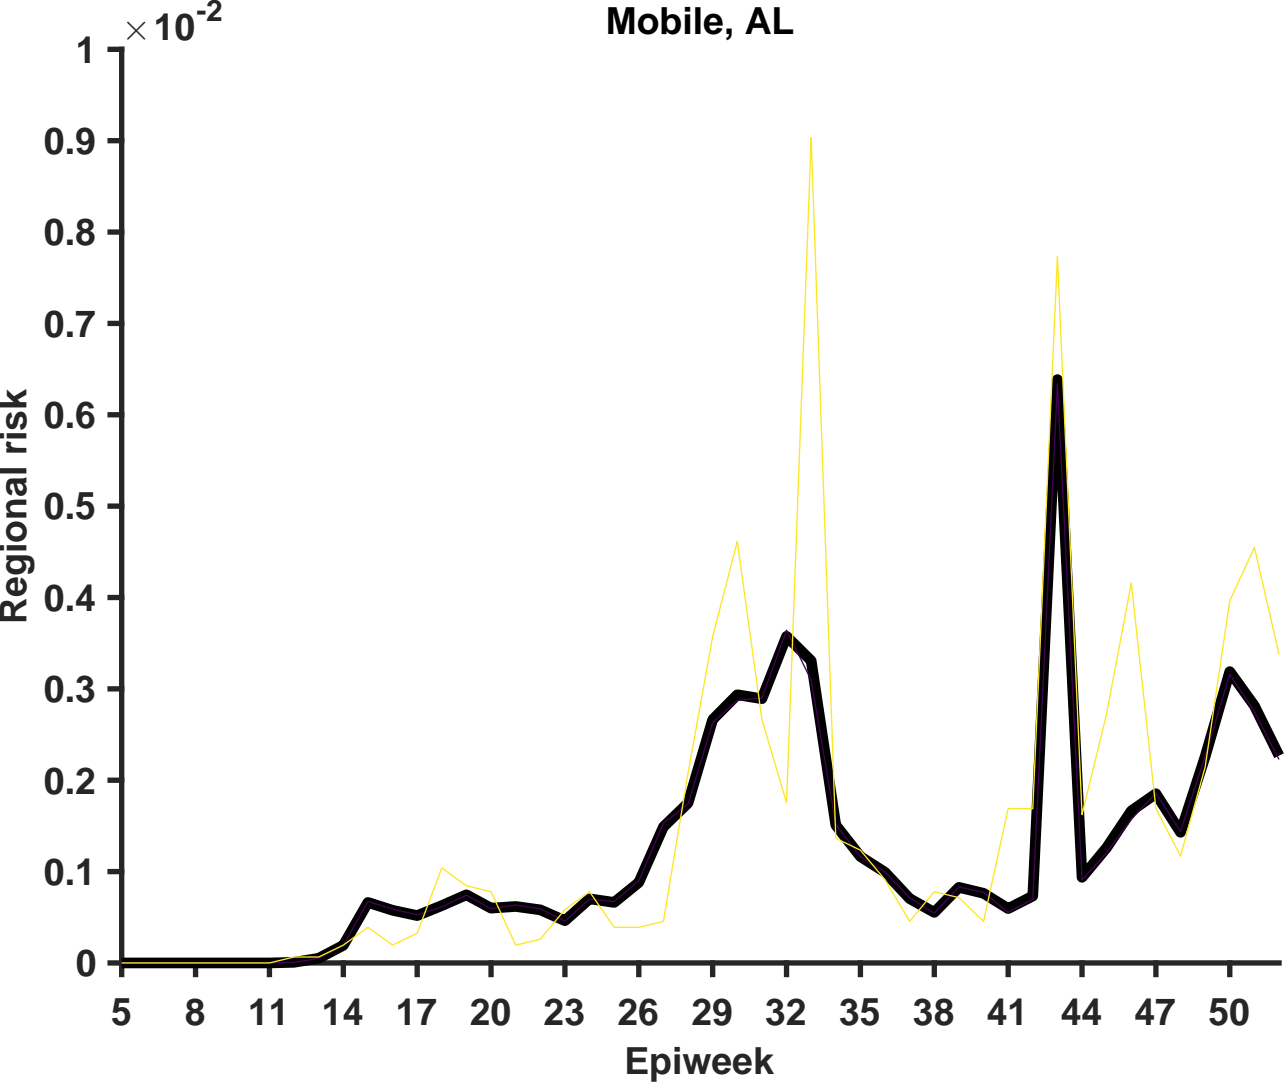

# Corpus Christi, TX

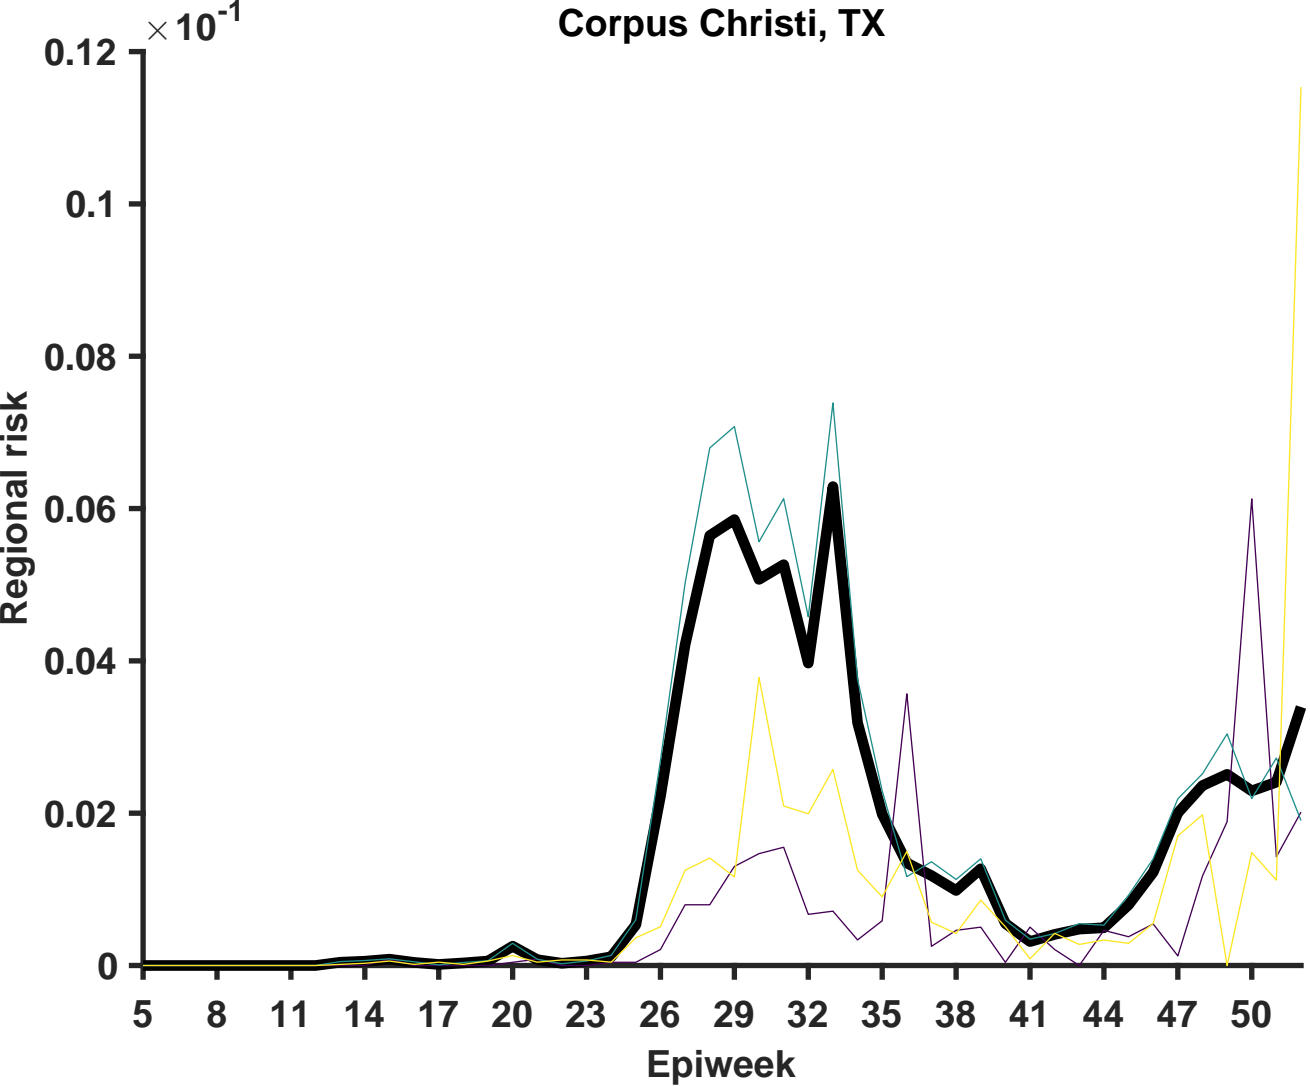

# Fort Wayne, IN

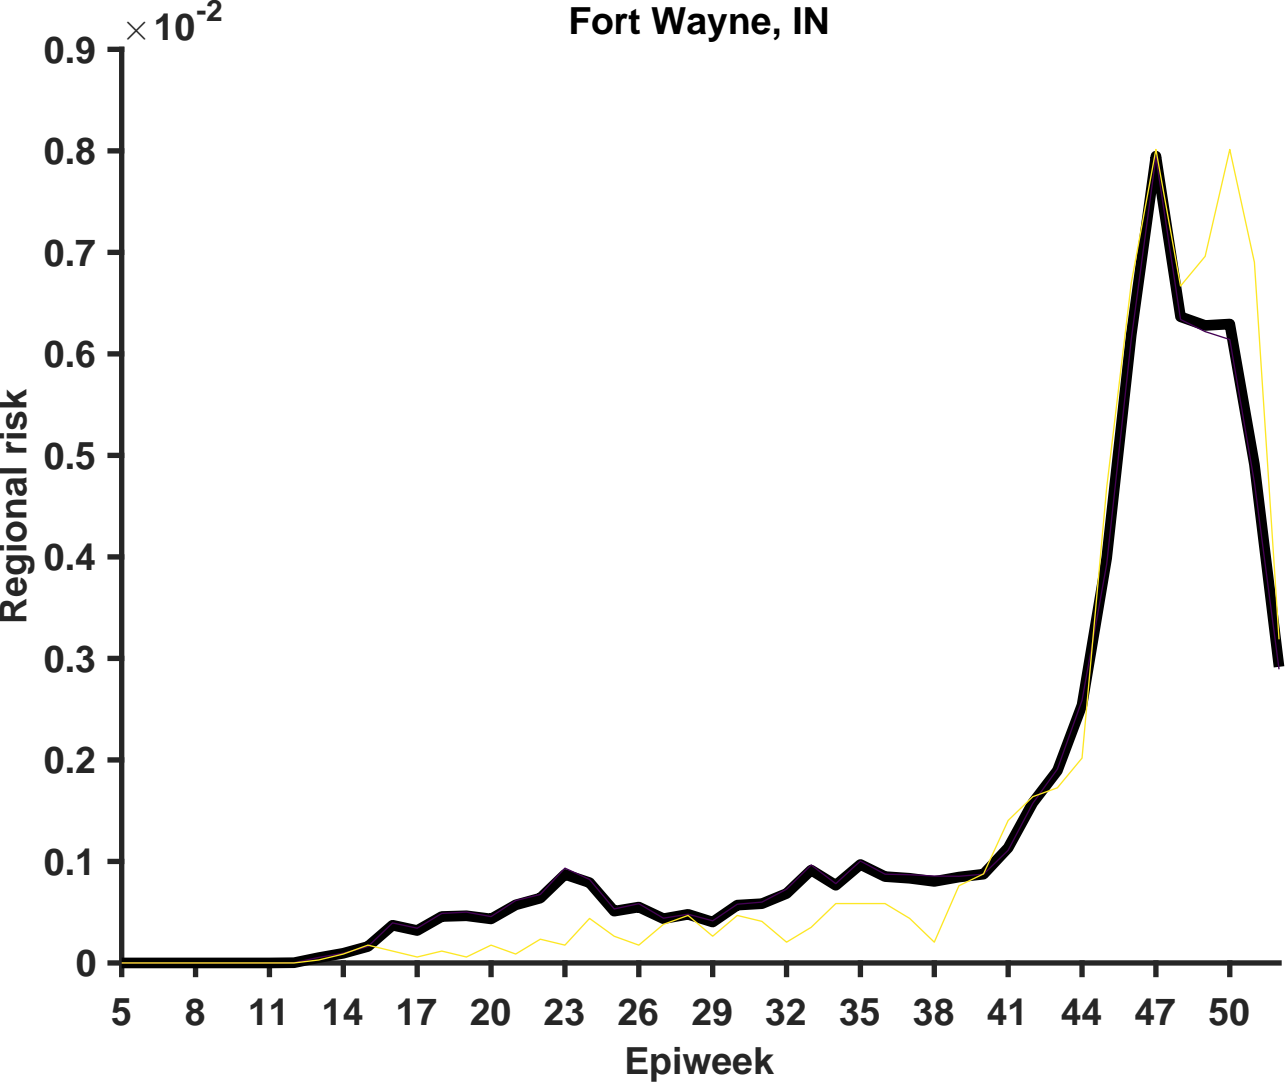

# Salisbury, MD-DE

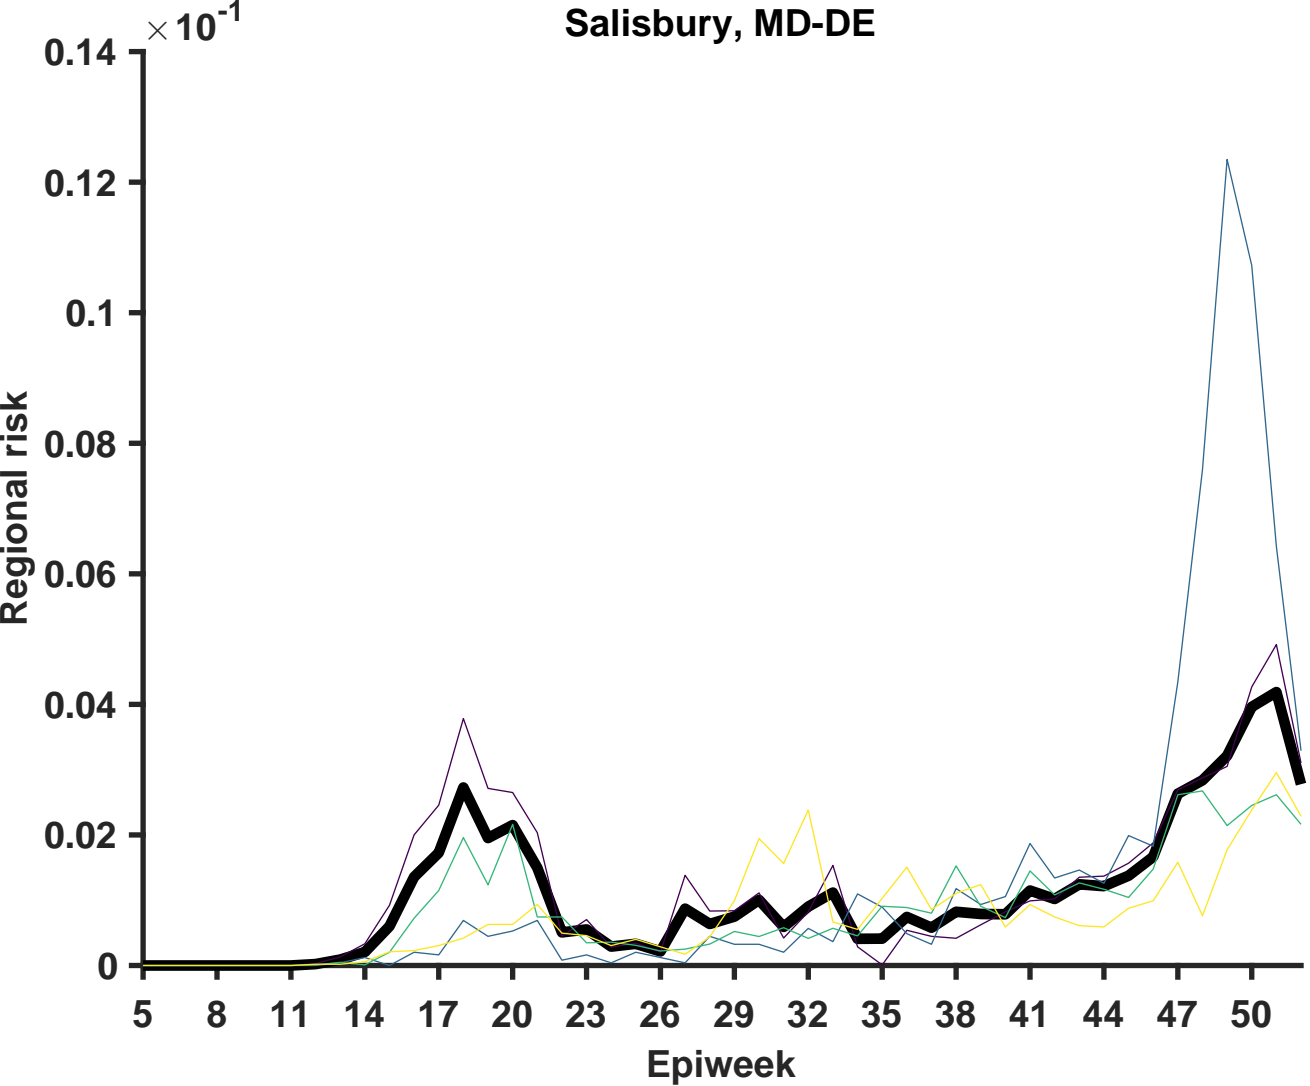

# Gulfport-Biloxi, MS

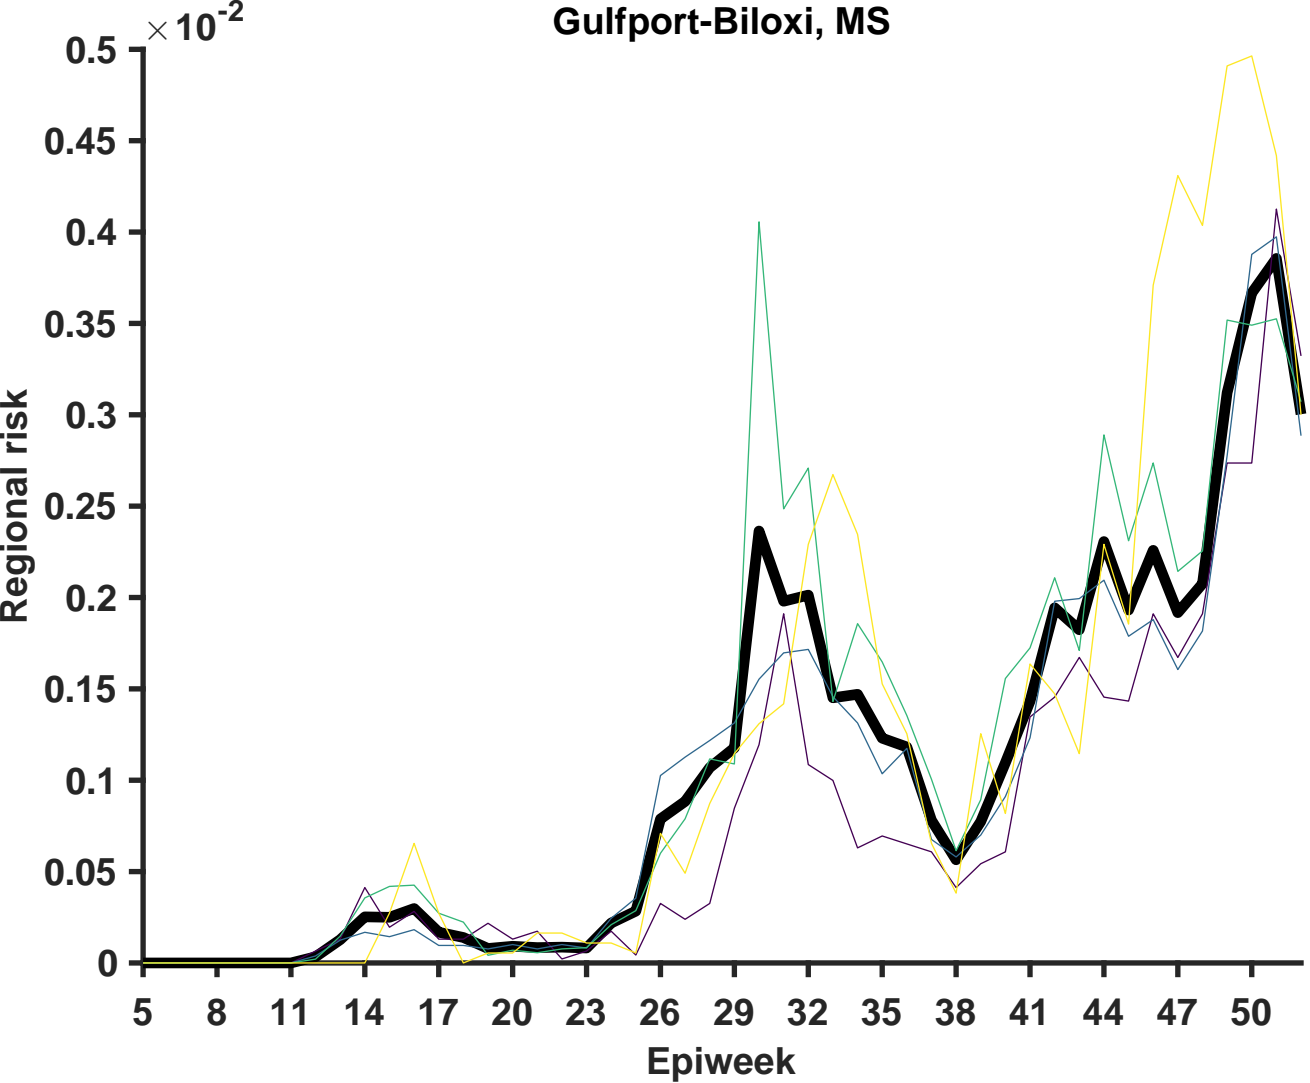



# Savannah, GA

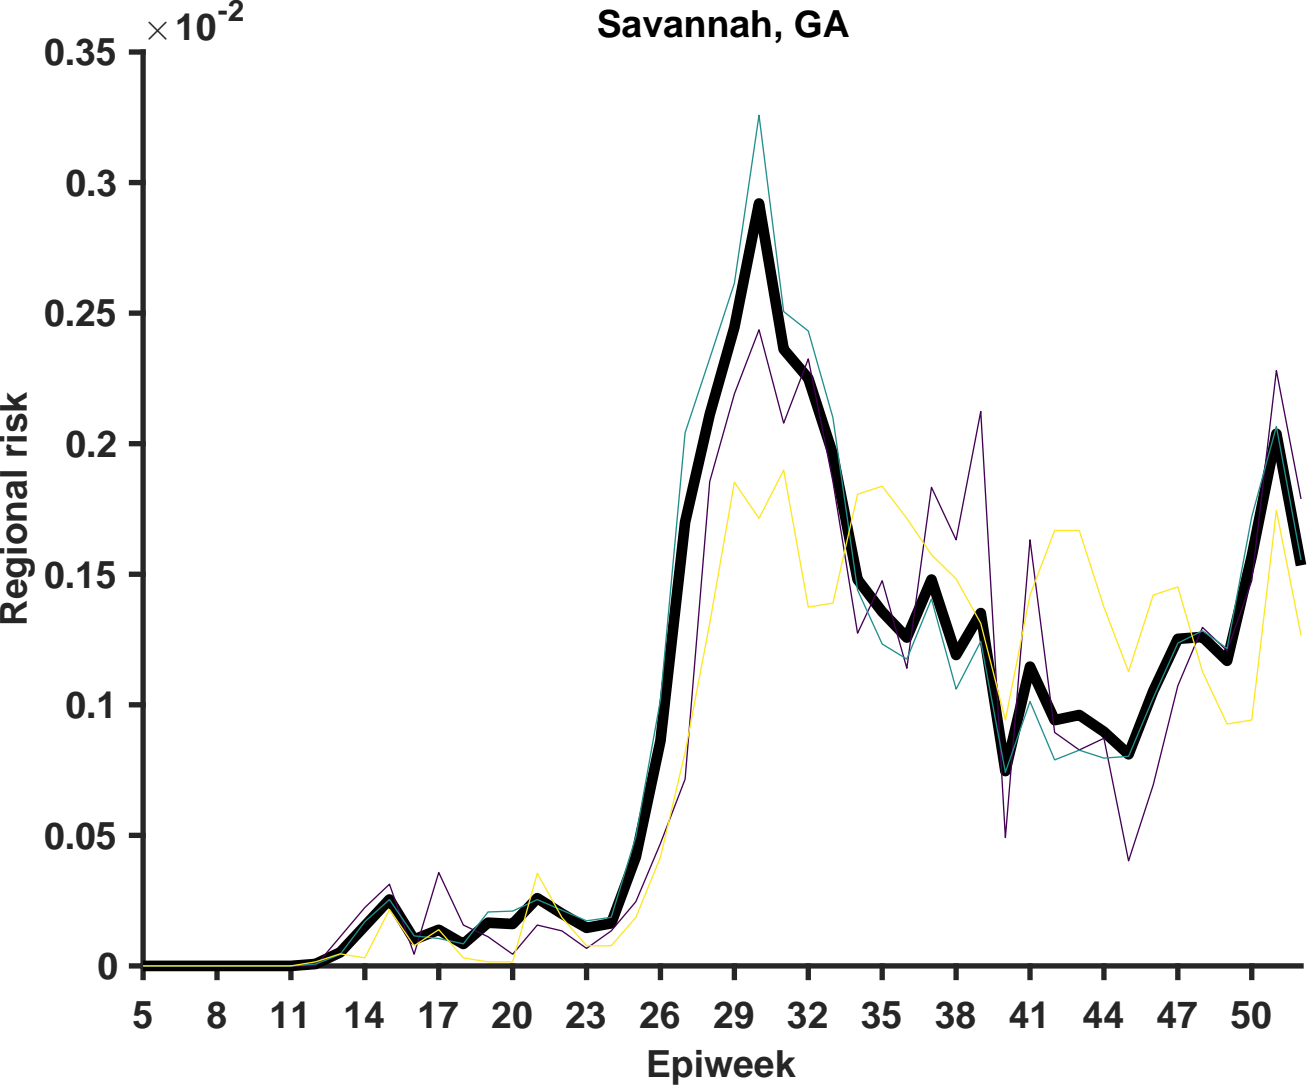

# Peoria, IL

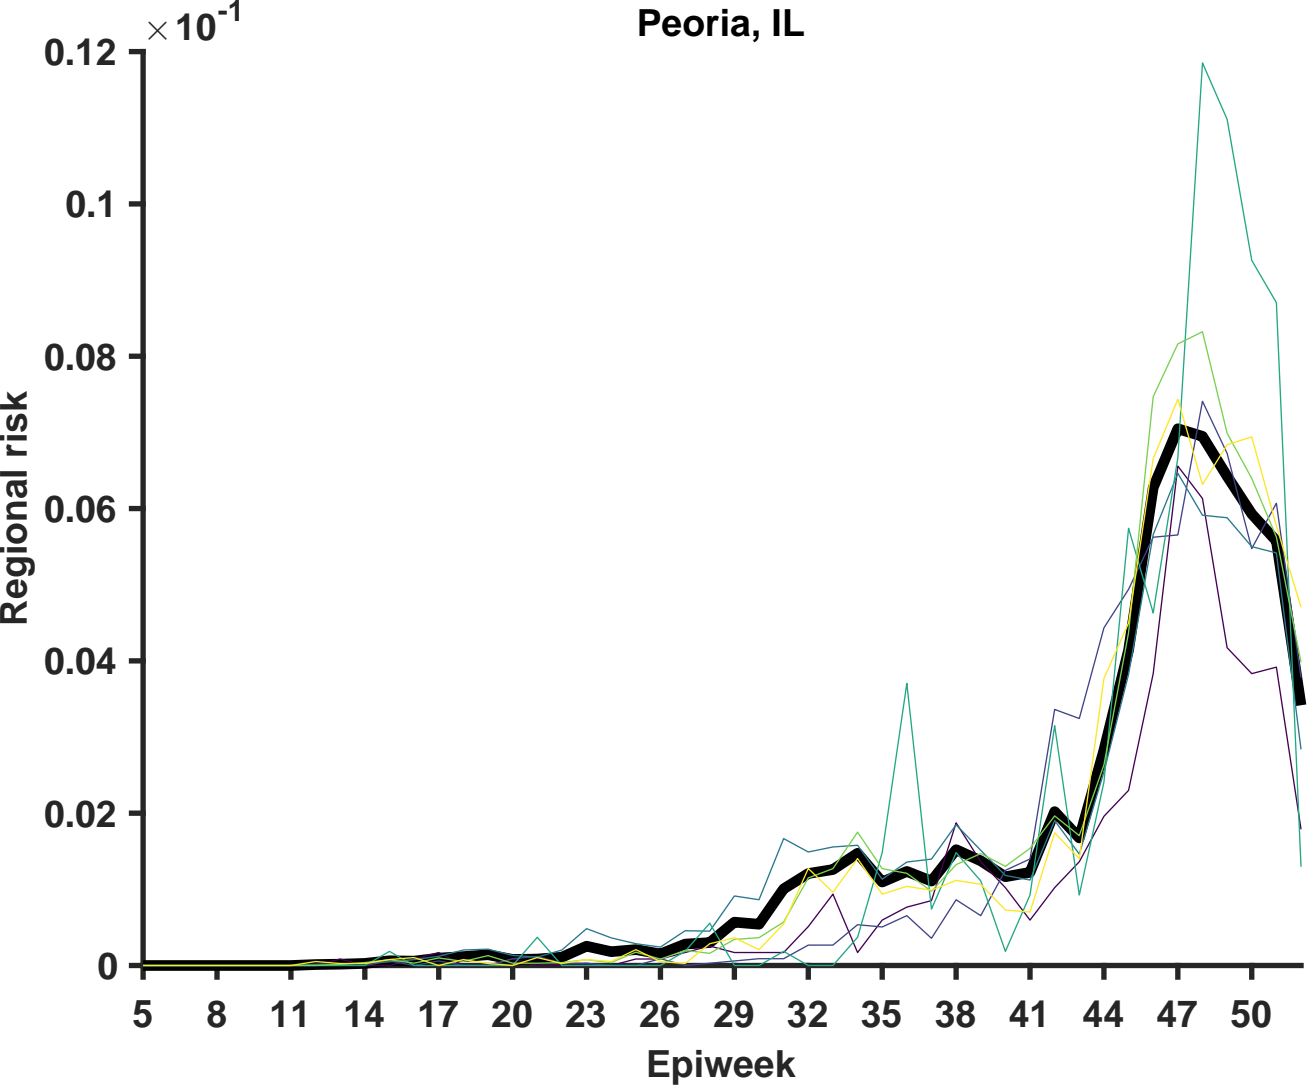

# Canton-Massillon, OH

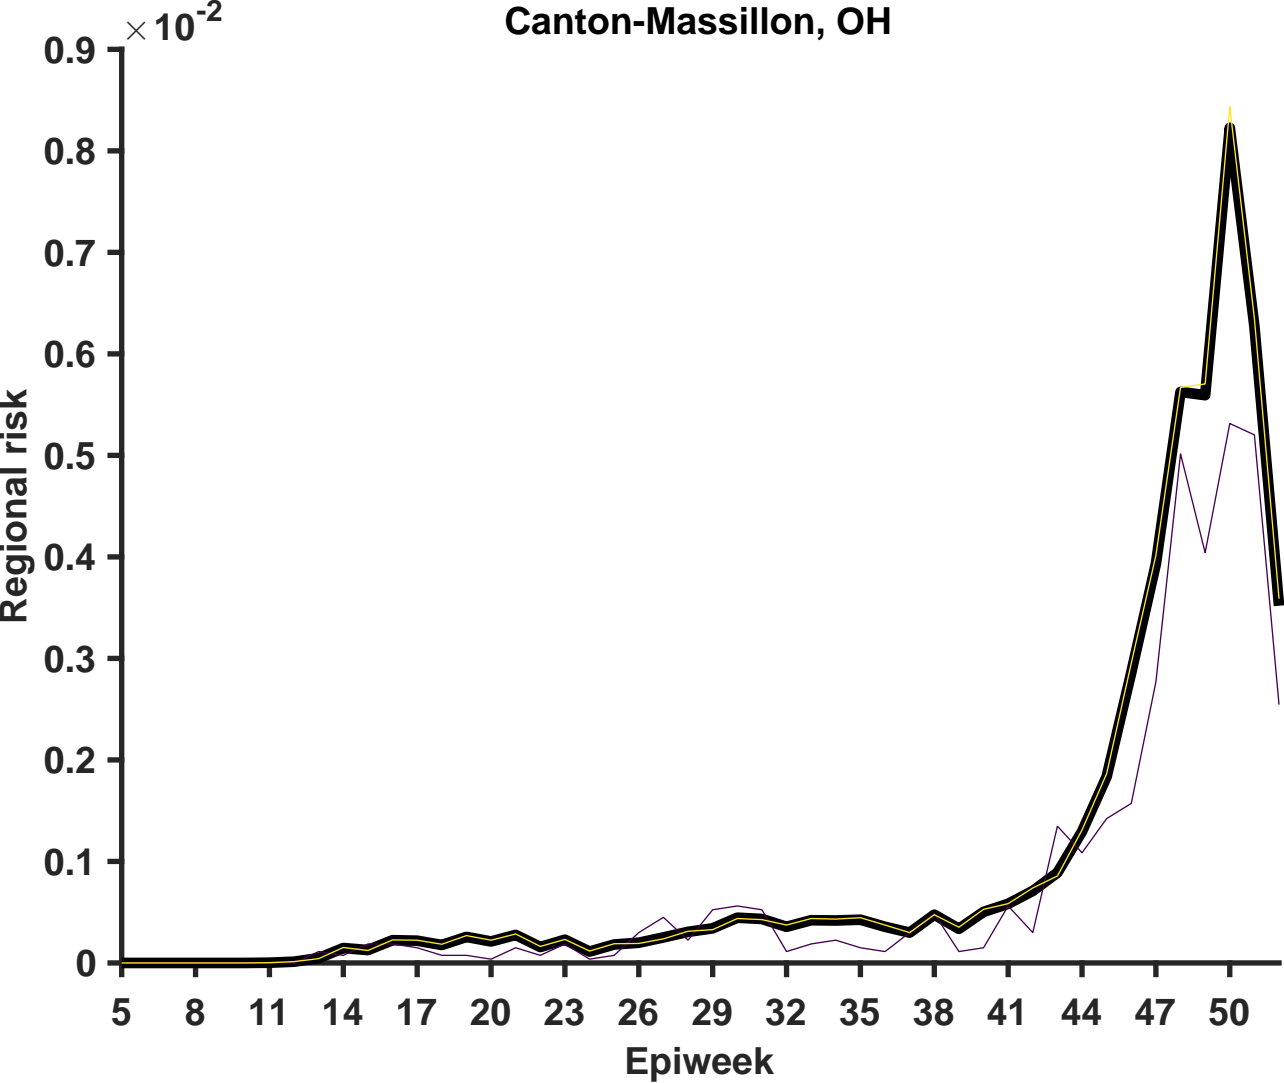

# Anchorage, AK

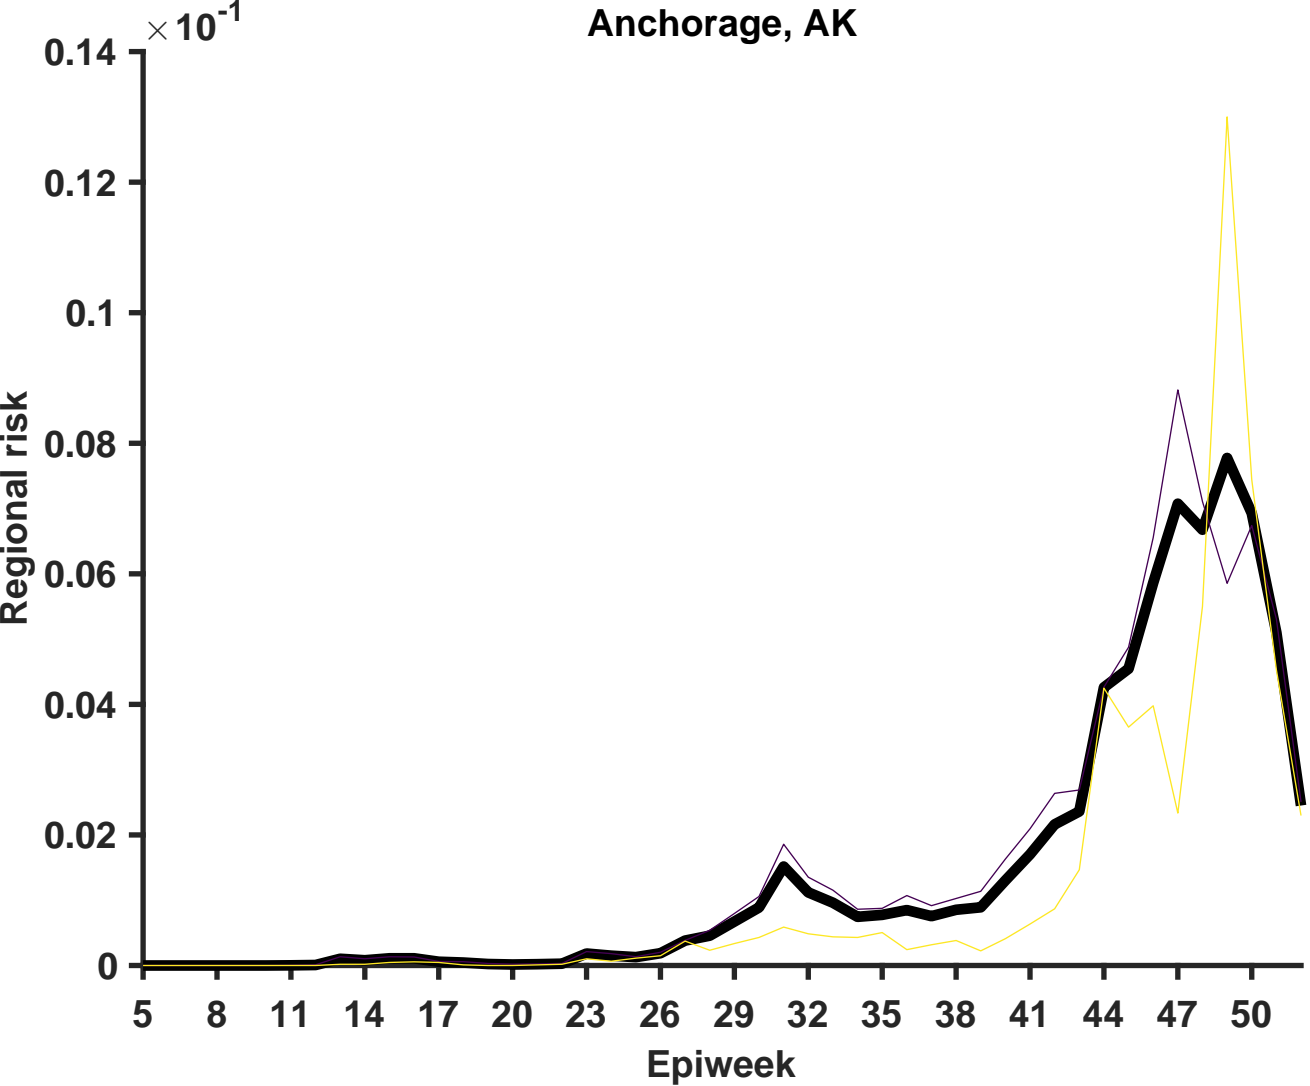

# Beaumont-Port Arthur, TX

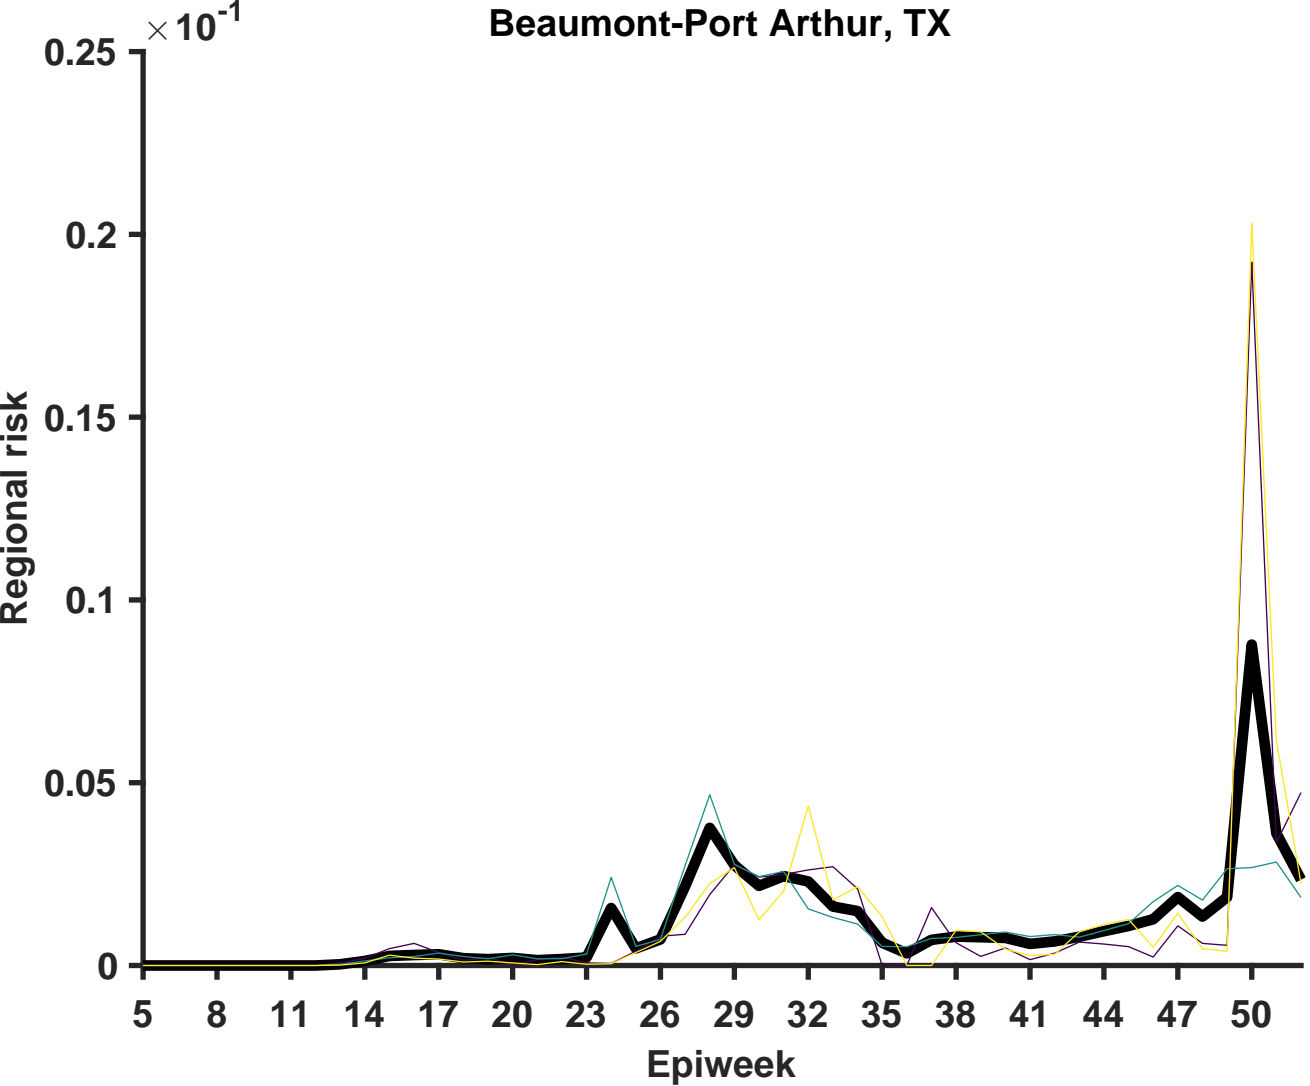

# Shreveport-Bossier City, LA

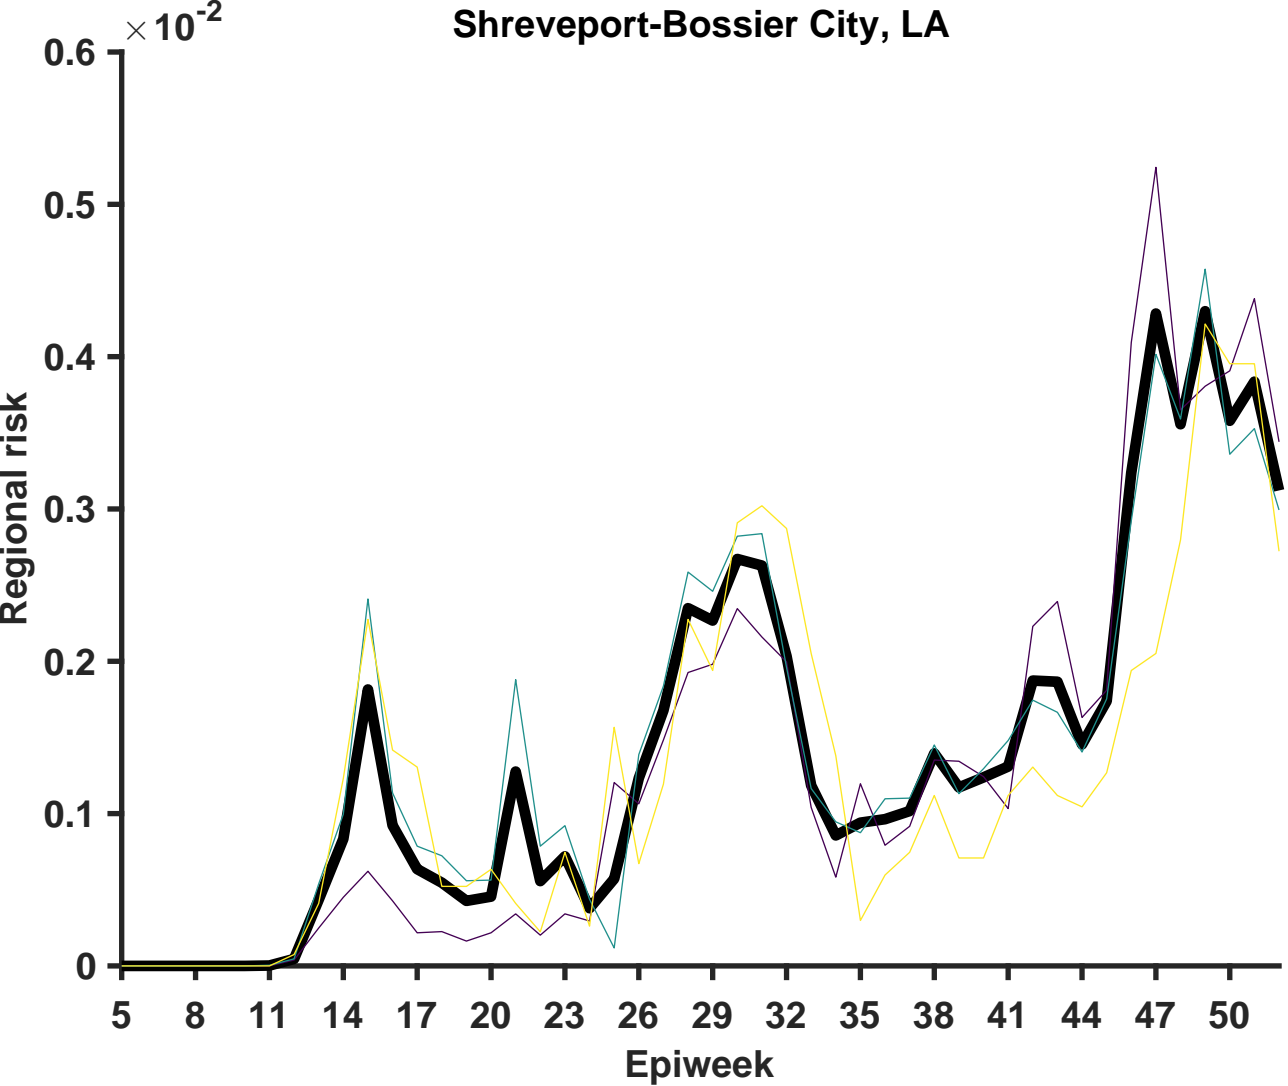

# Montgomery, AL

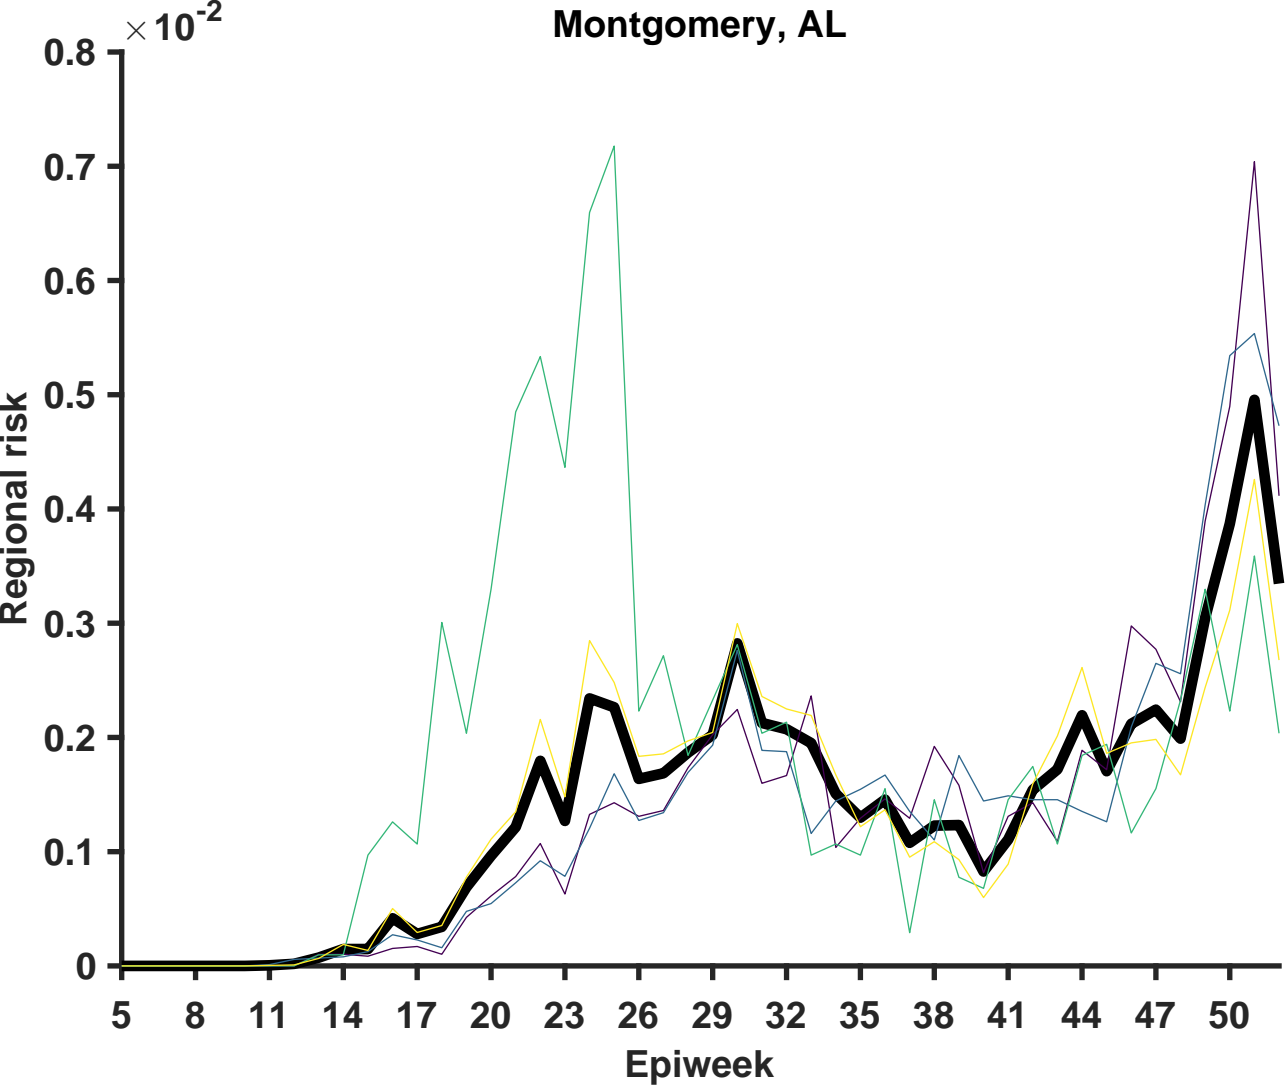

# Davenport-Moline-Rock Island, IA-IL

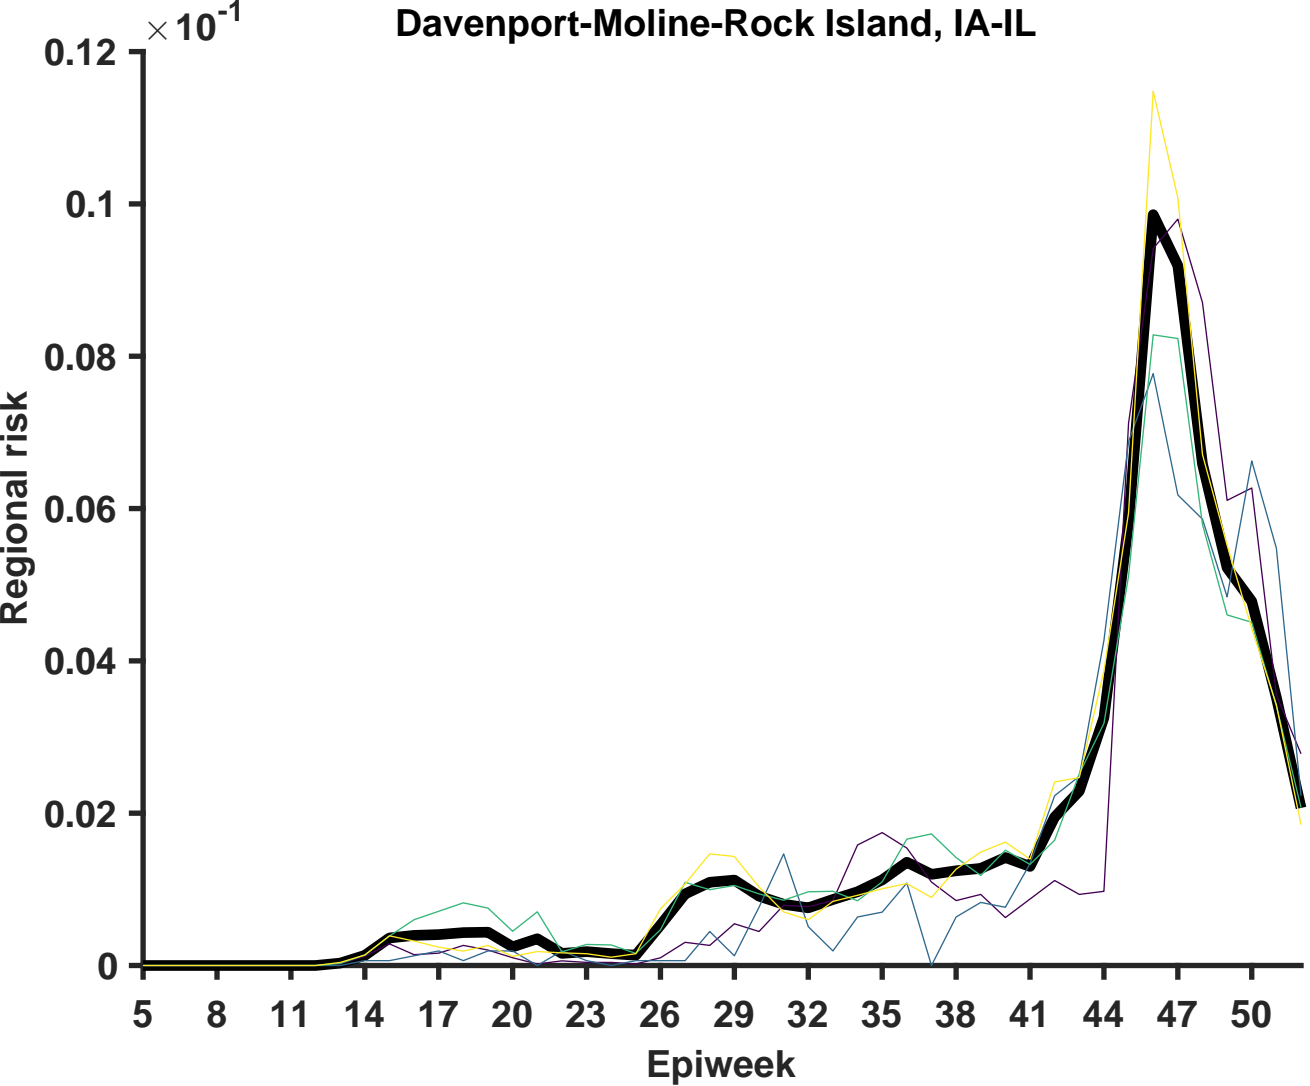



# Tallahassee, FL

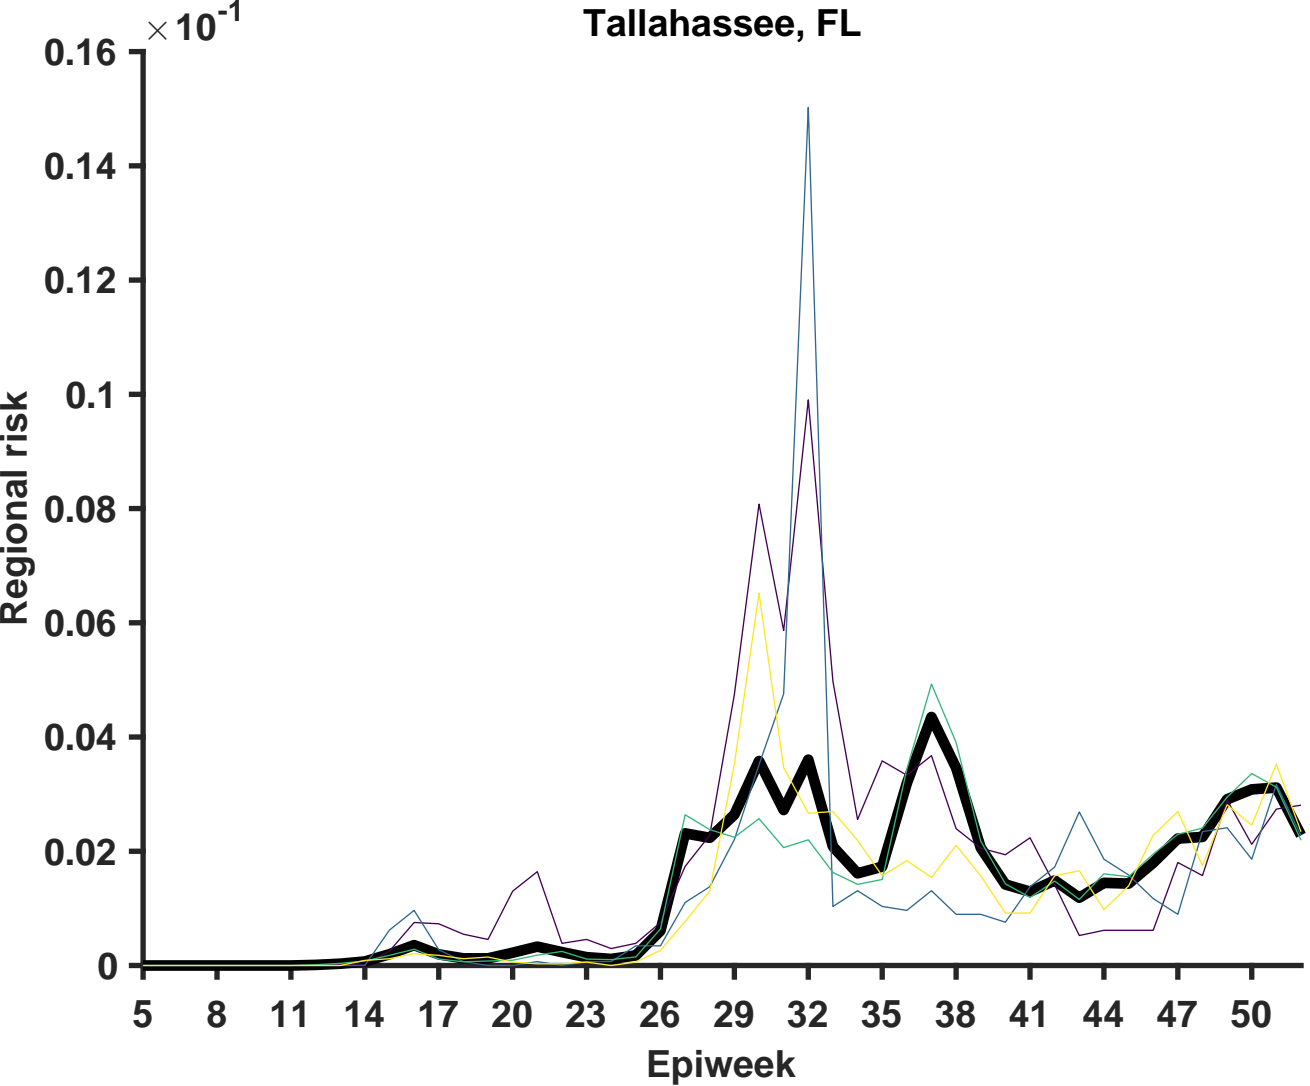

# Hickory-Lenoir-Morganton, NC

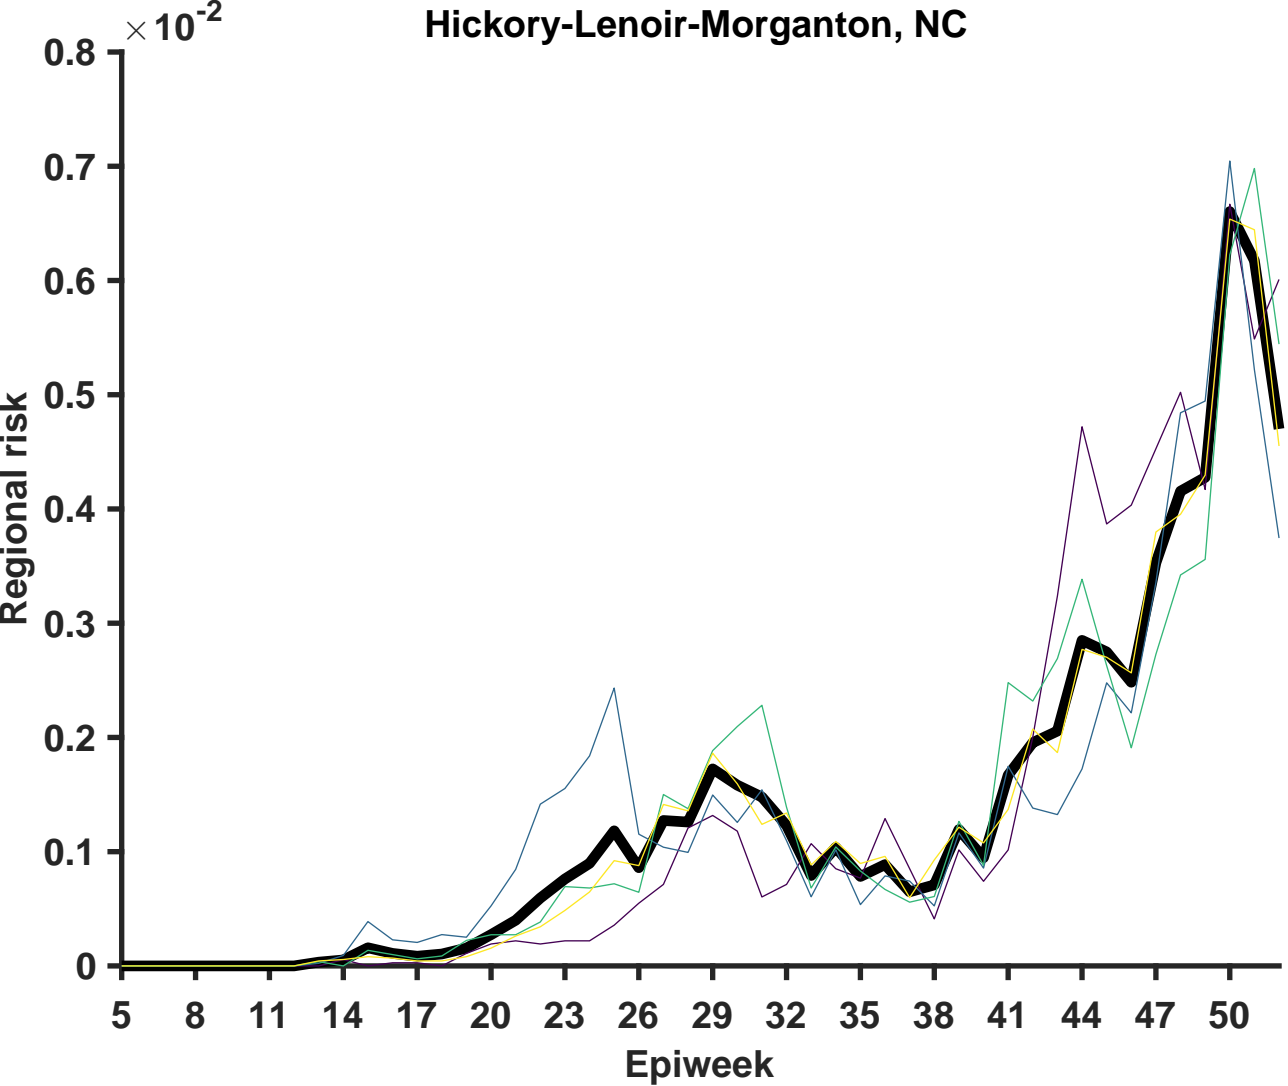

# Huntington-Ashland, WV-KY-OH

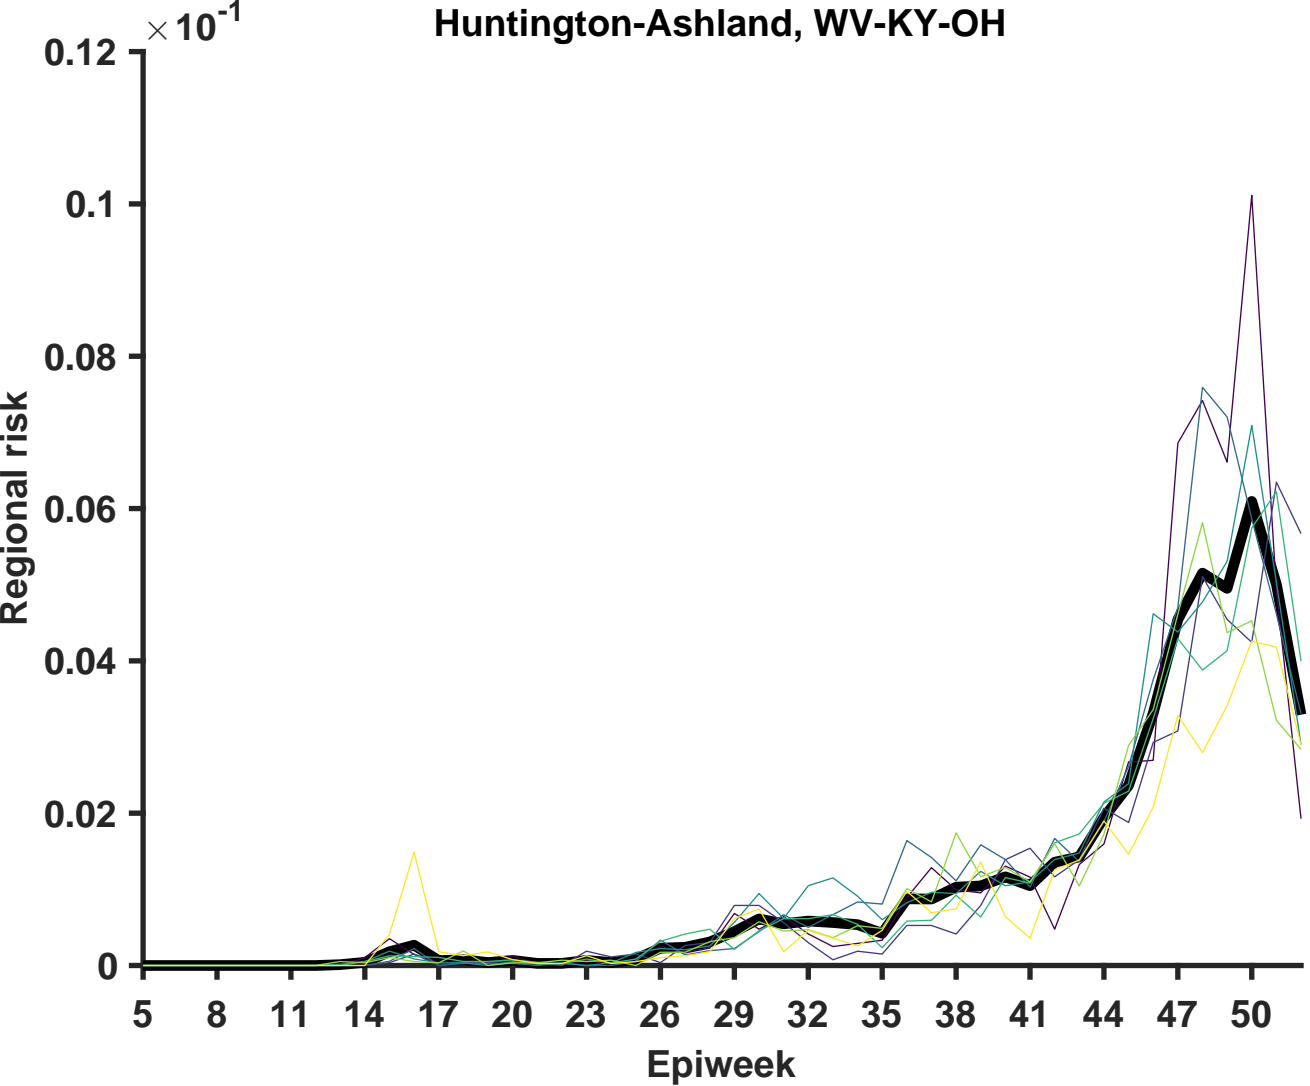

# Lincoln, NE

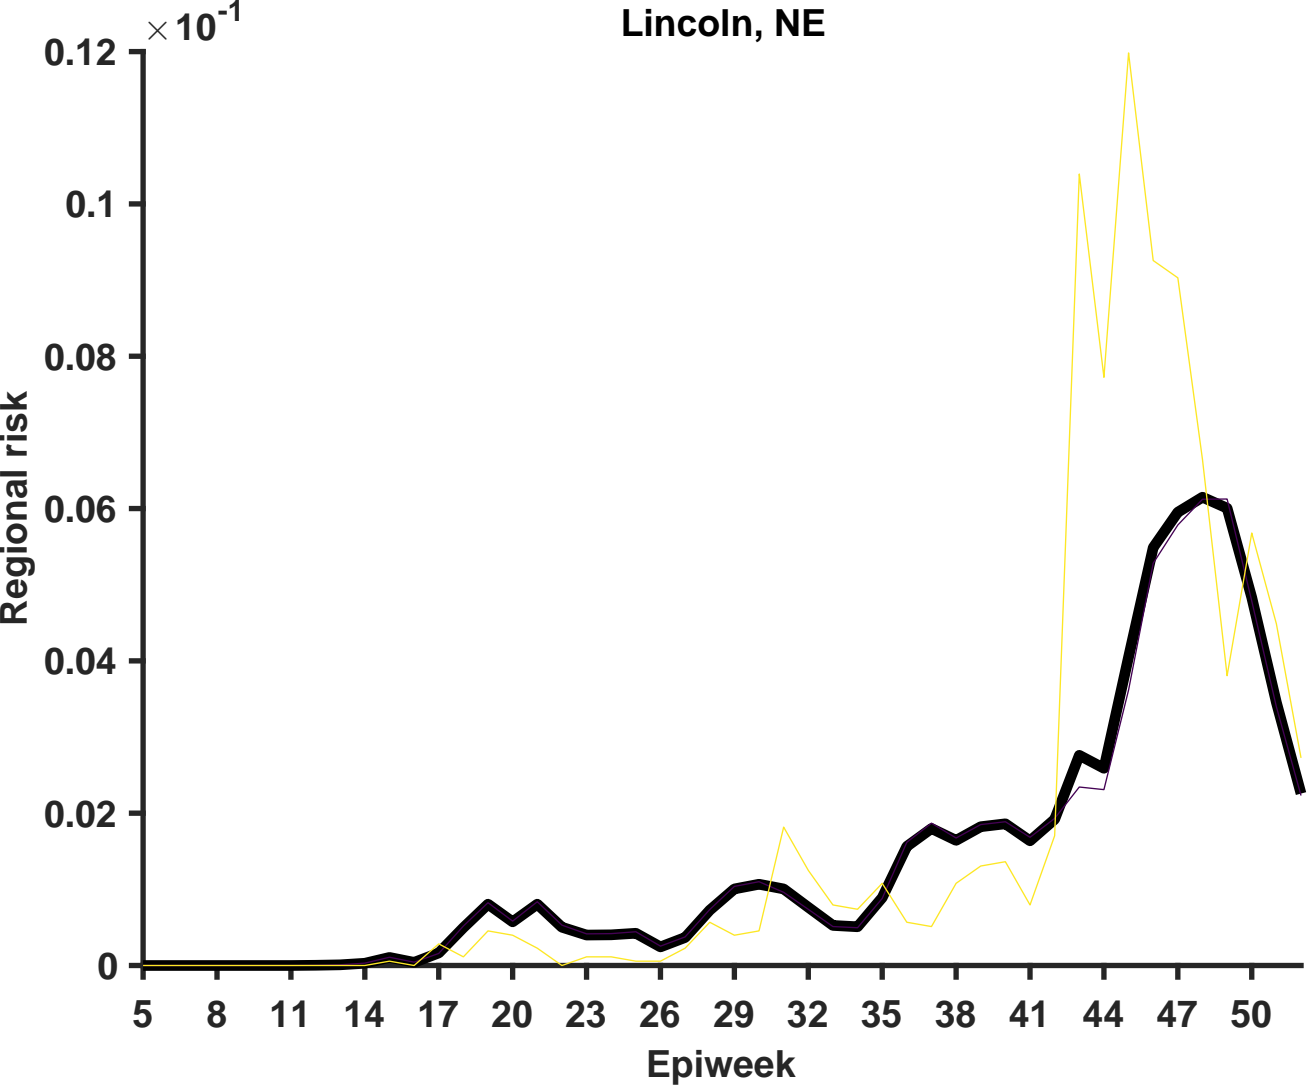

# Gainesville, FL

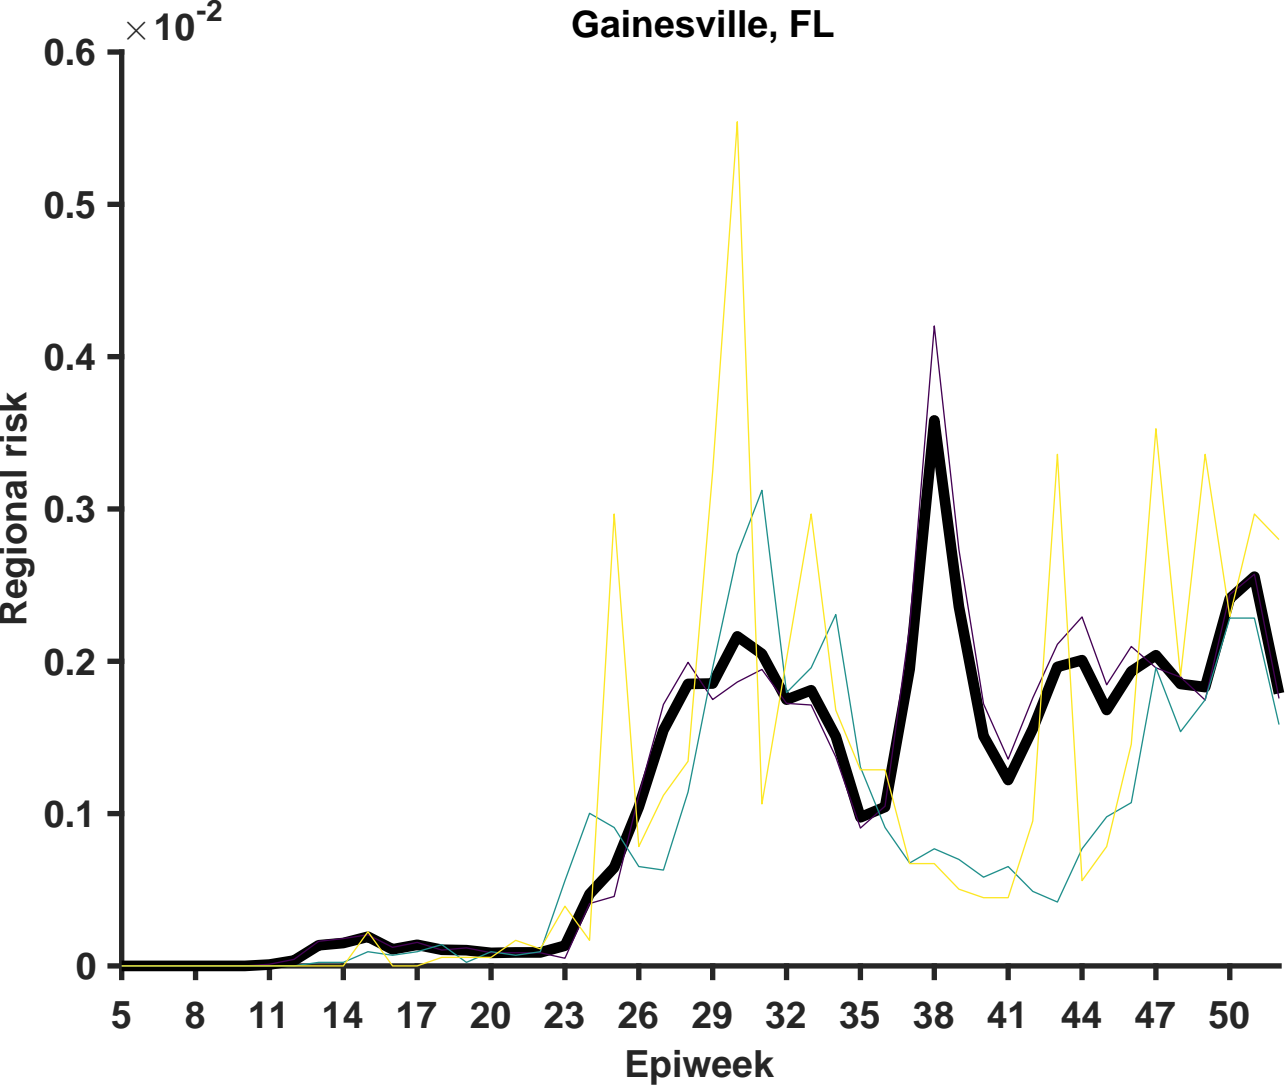

# Rockford, IL

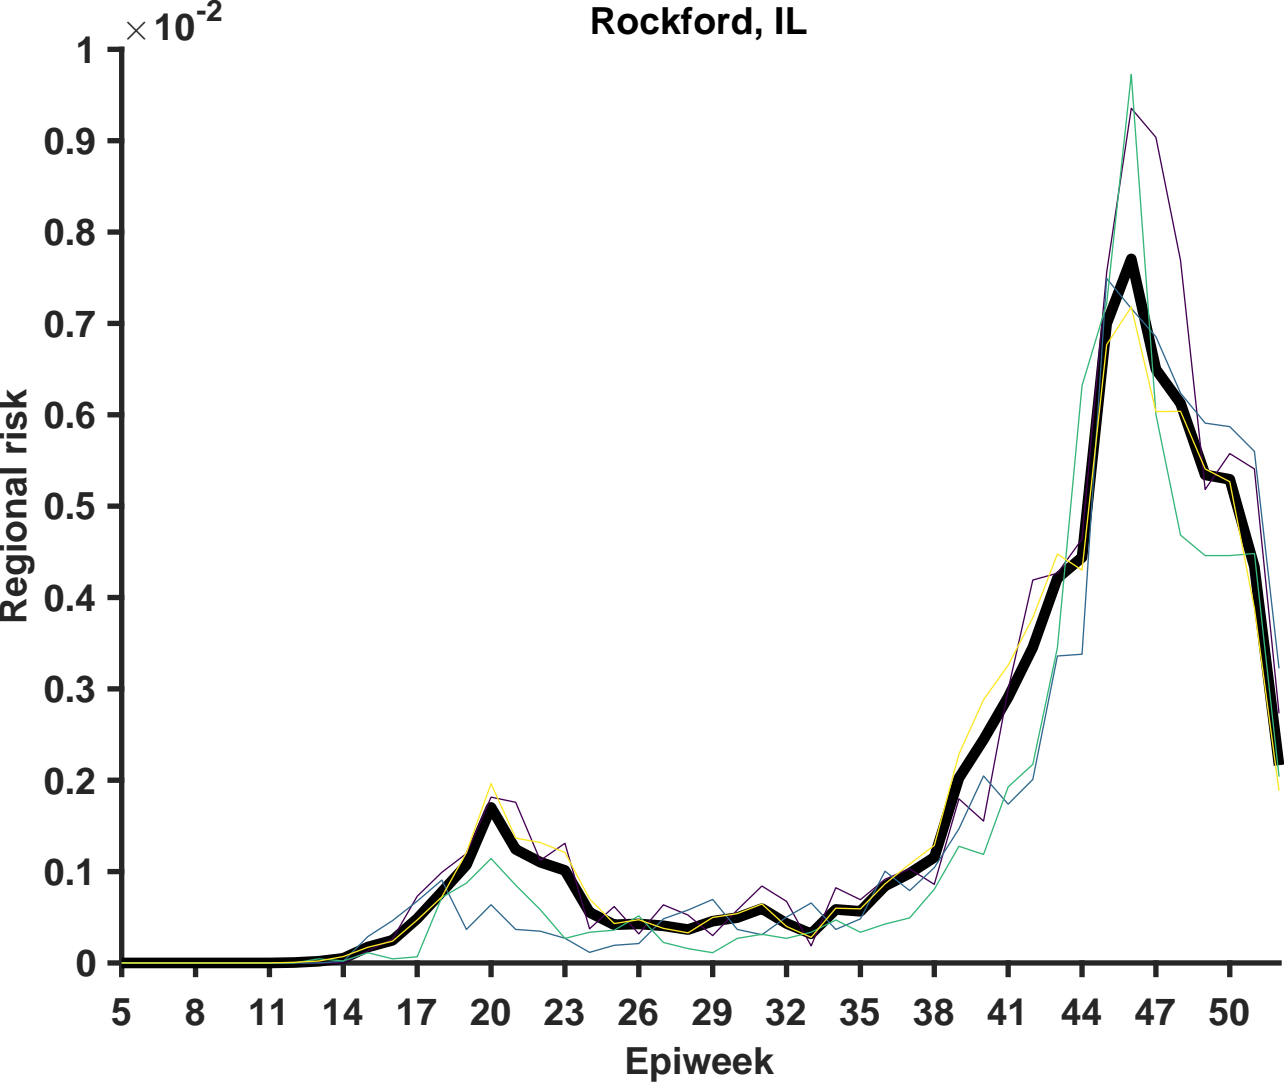

# Columbus, GA-AL

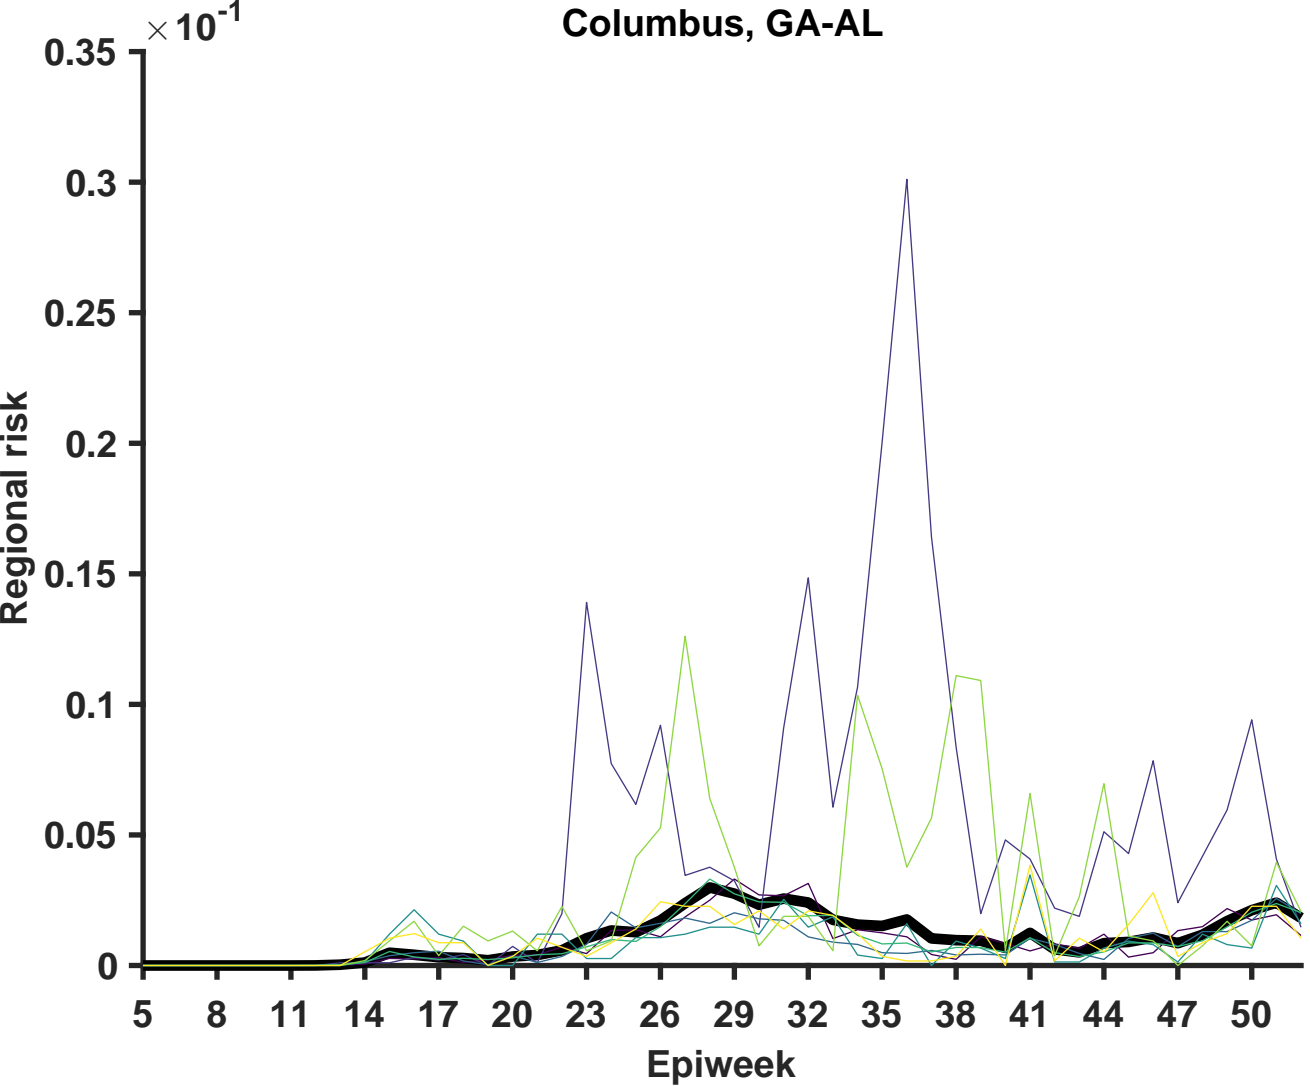

# Green Bay, WI

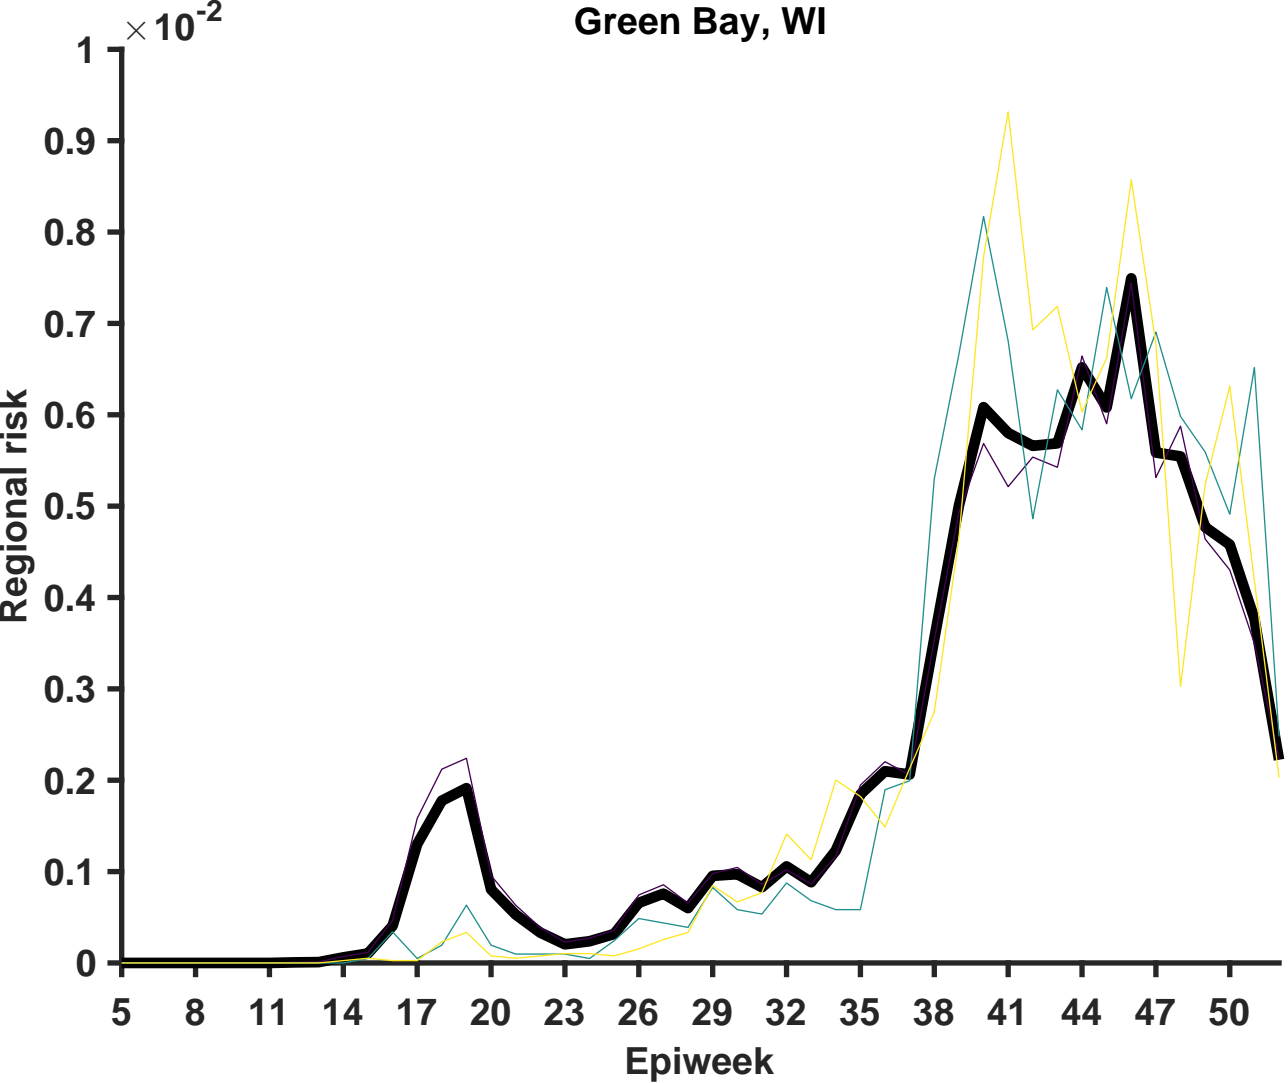



# South Bend-Mishawaka, IN-MI

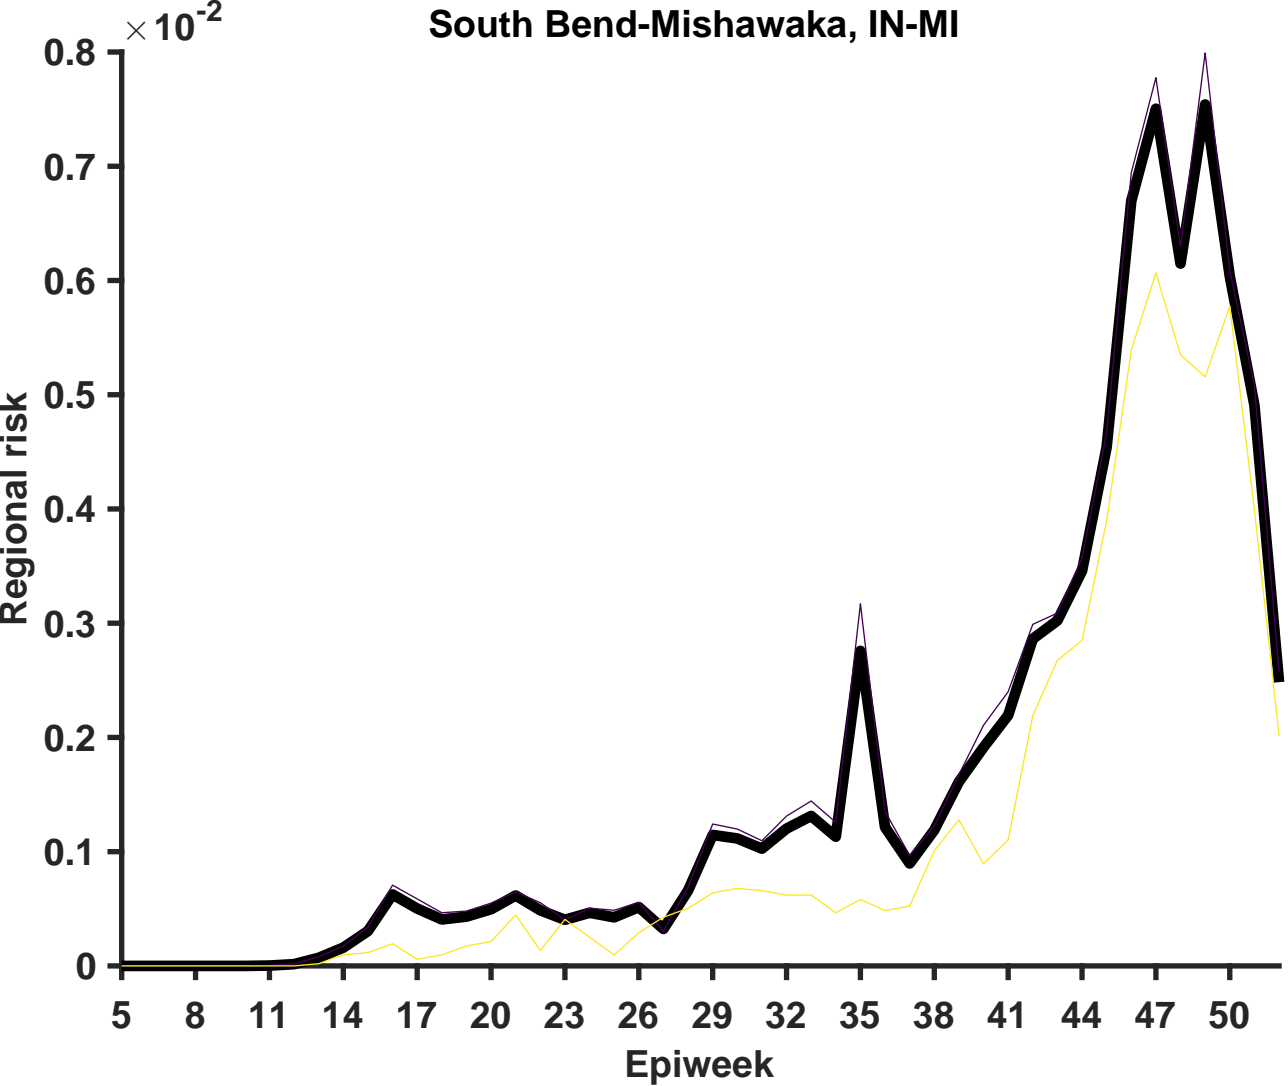

# Lubbock, TX

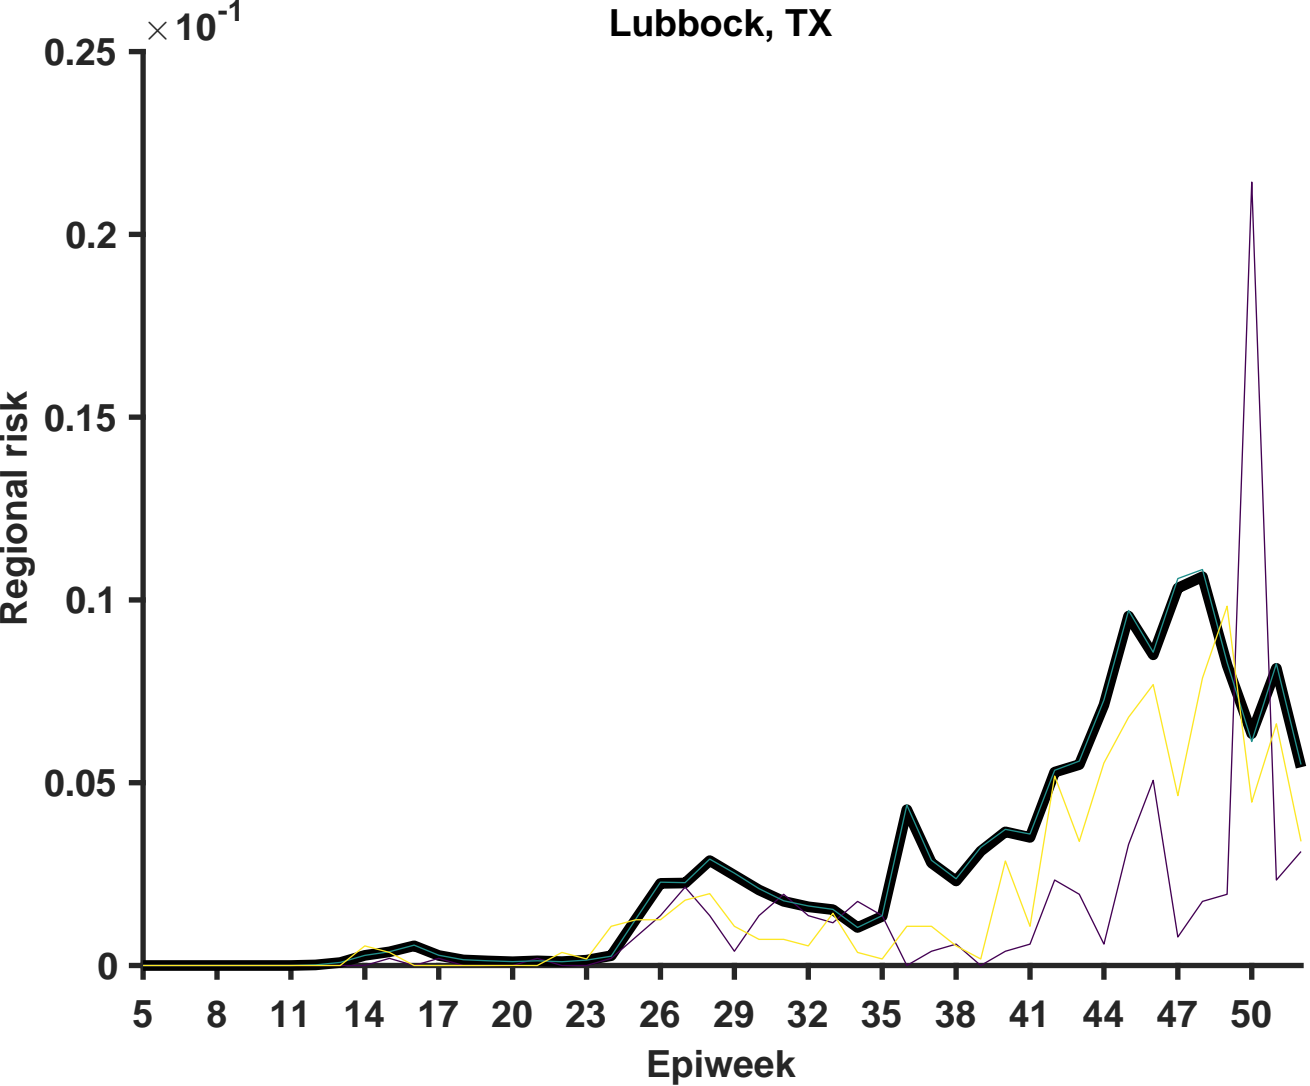

# Clarksville, TN-KY

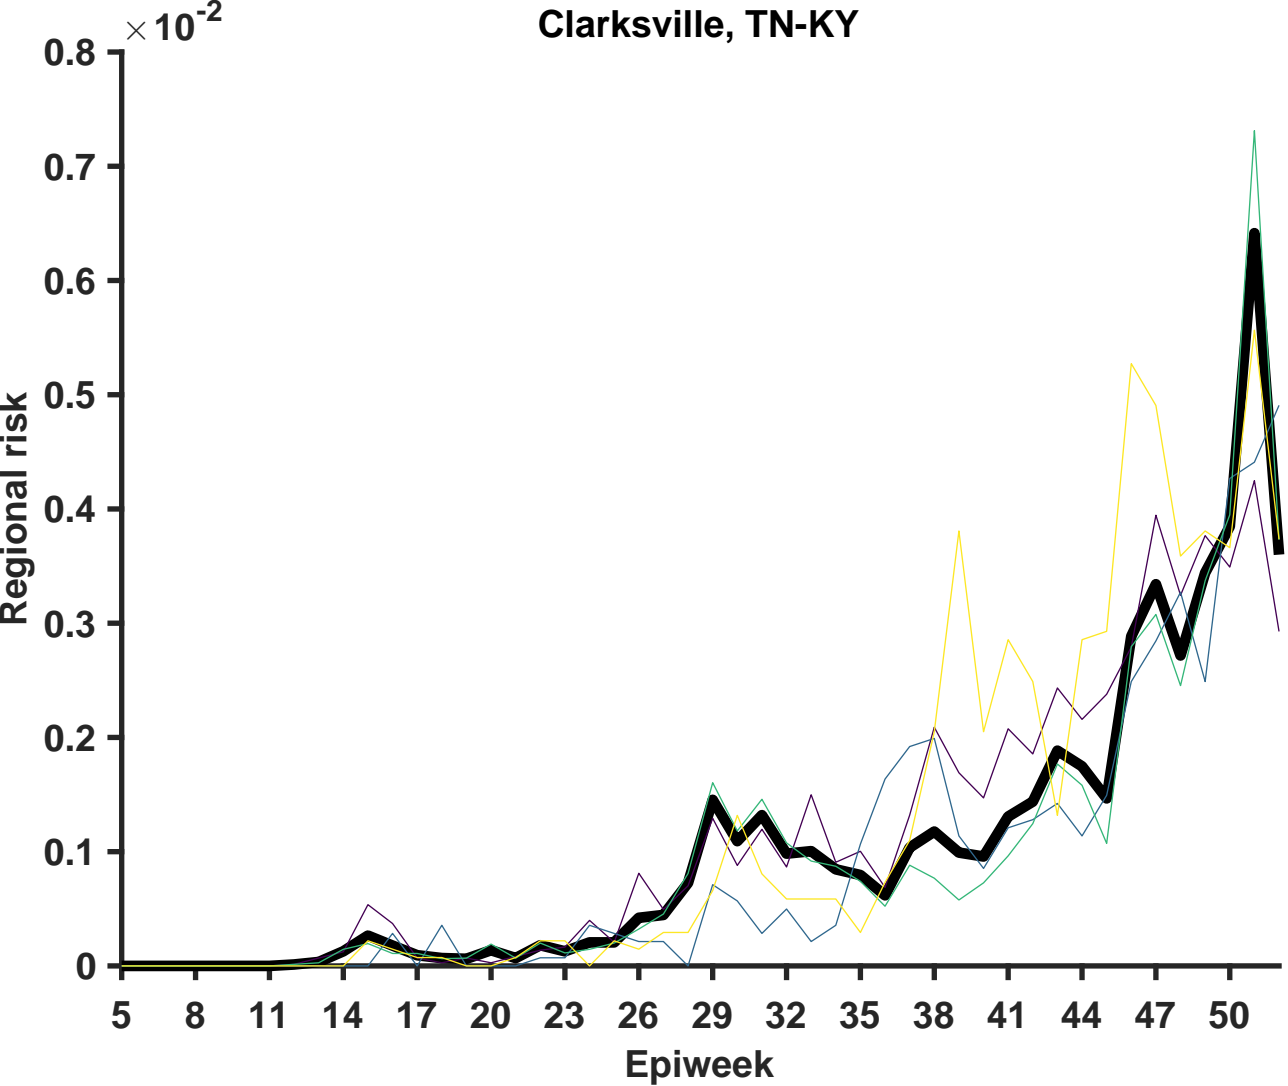

# Roanoke, VA

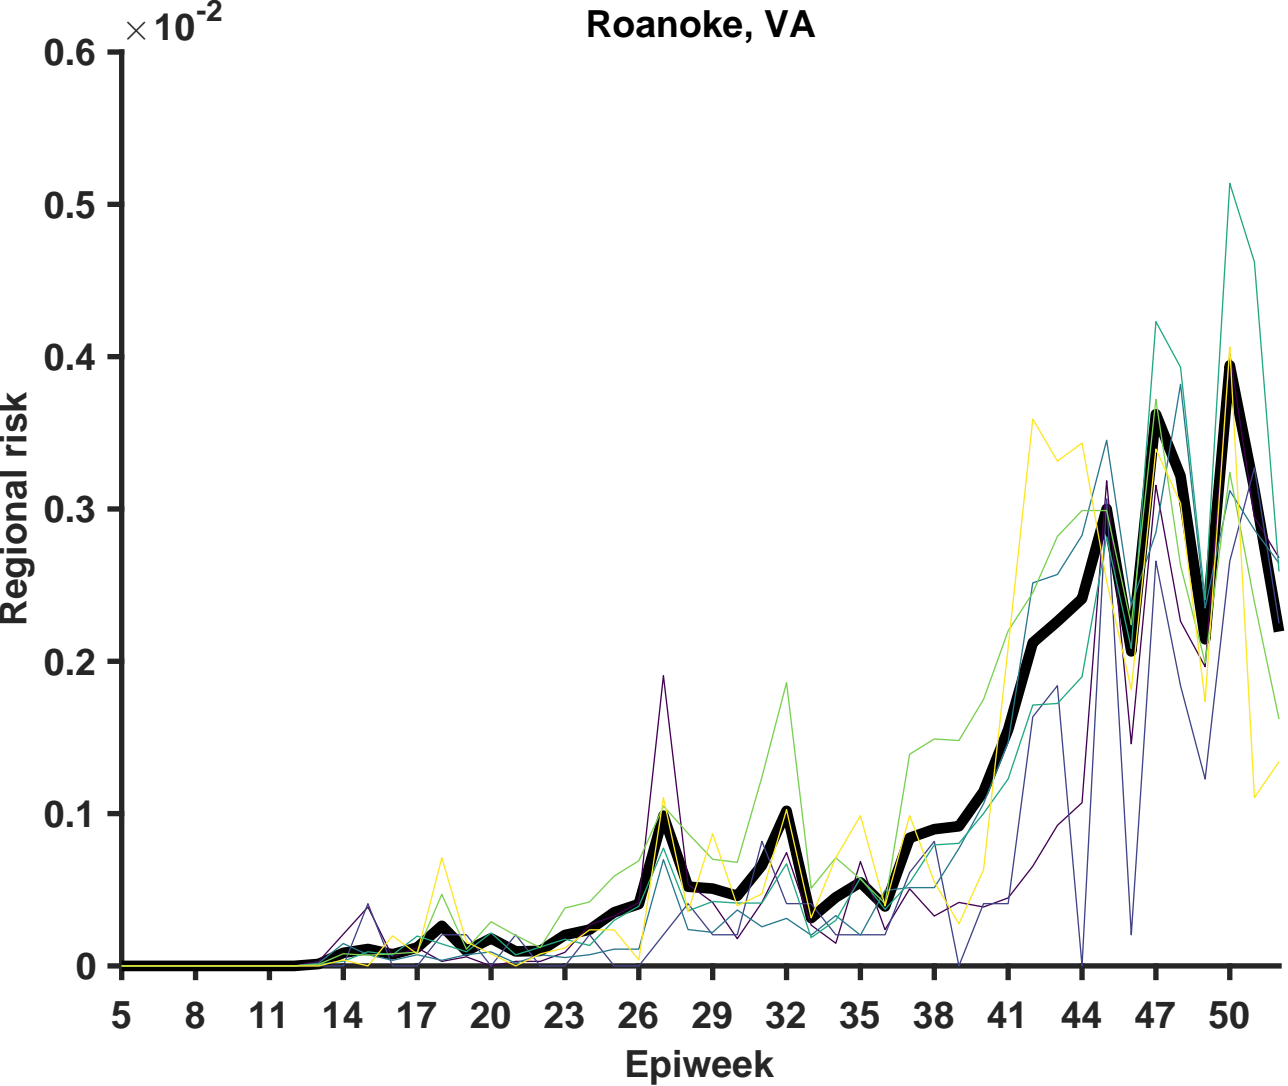

# Evansville, IN-KY

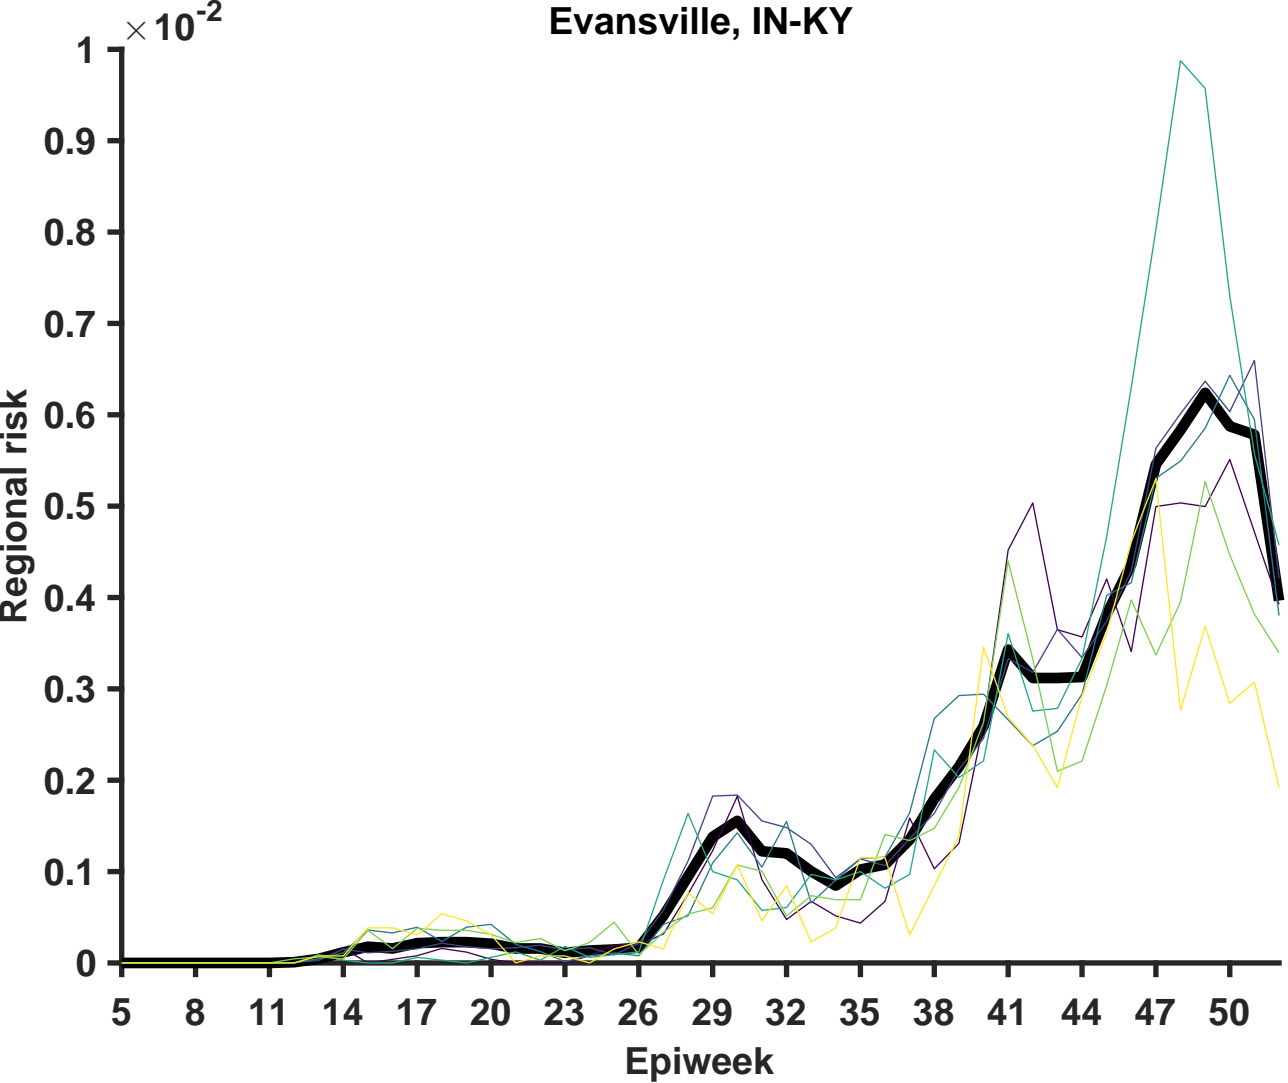

# Kingsport-Bristol, TN-VA

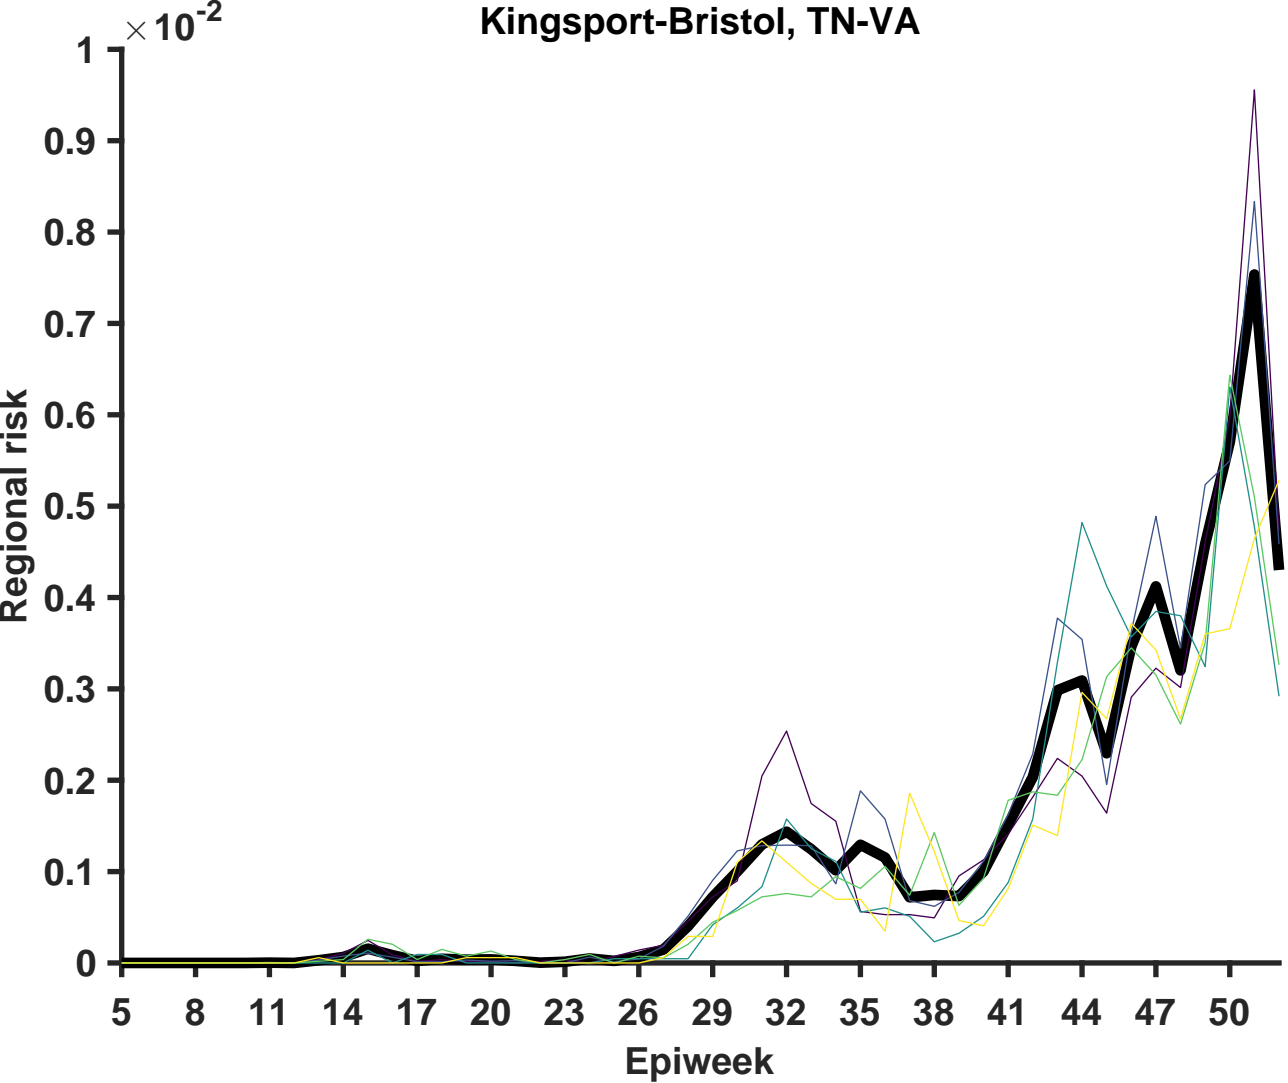

# Kennewick-Richland, WA

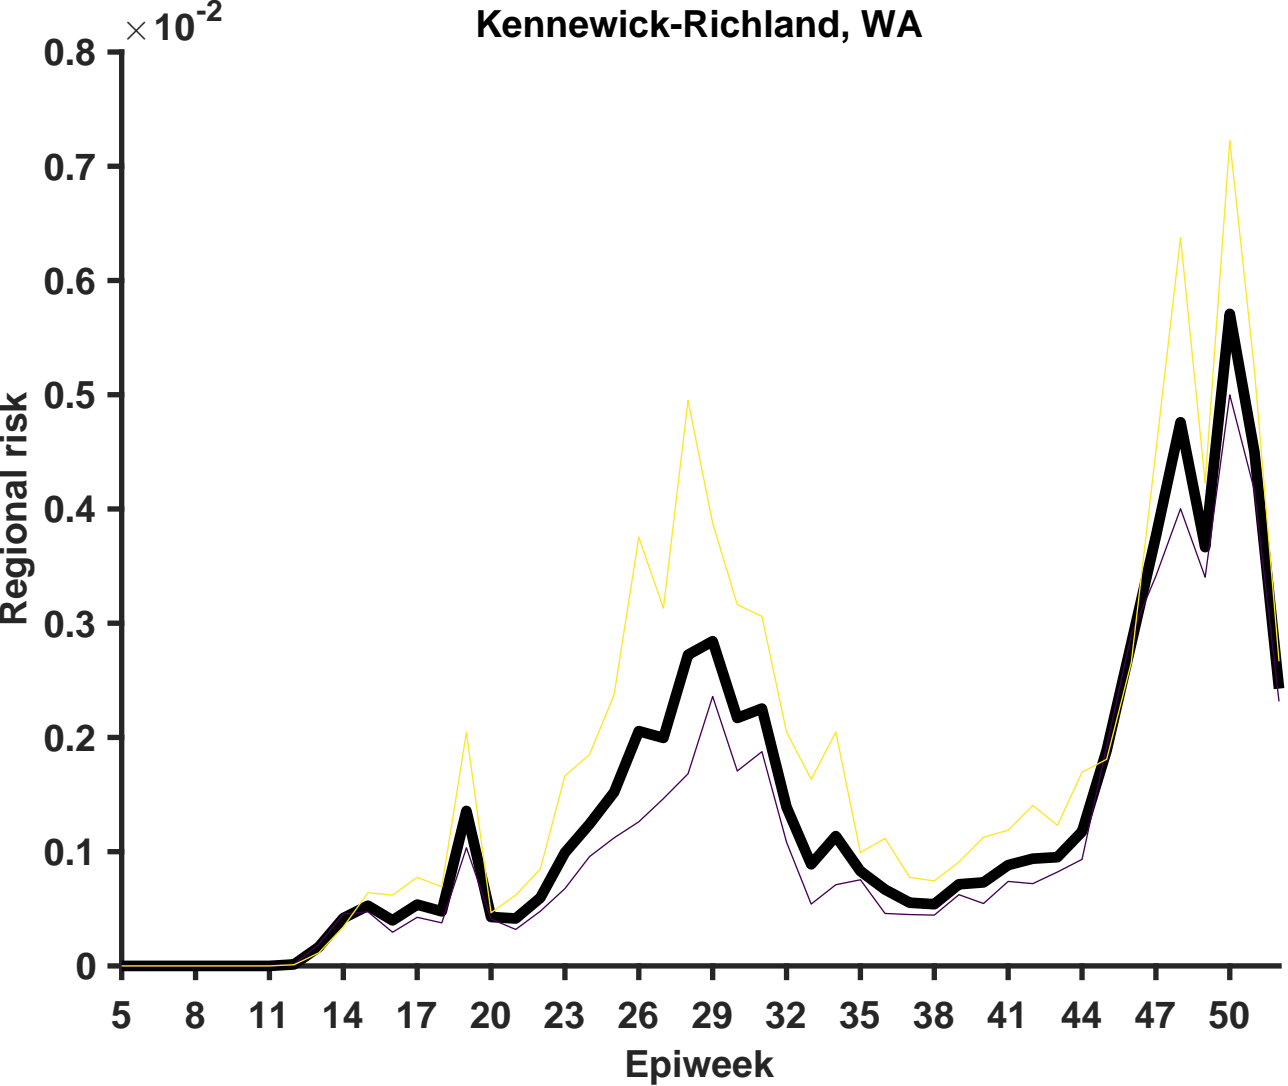

# Hagerstown-Martinsburg, MD-WV

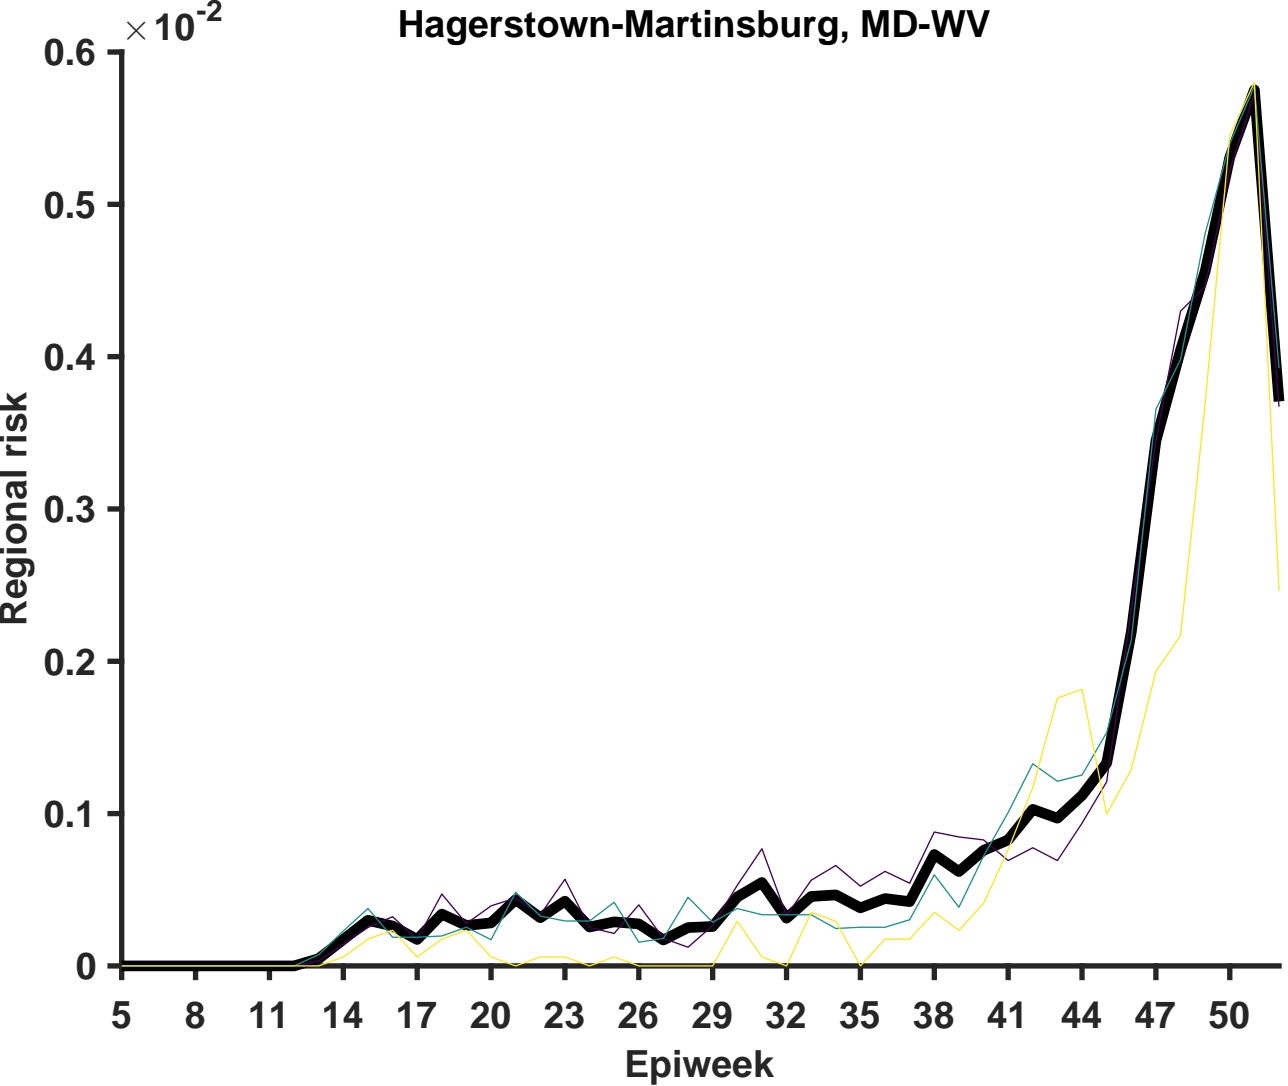



# Utica-Rome, NY

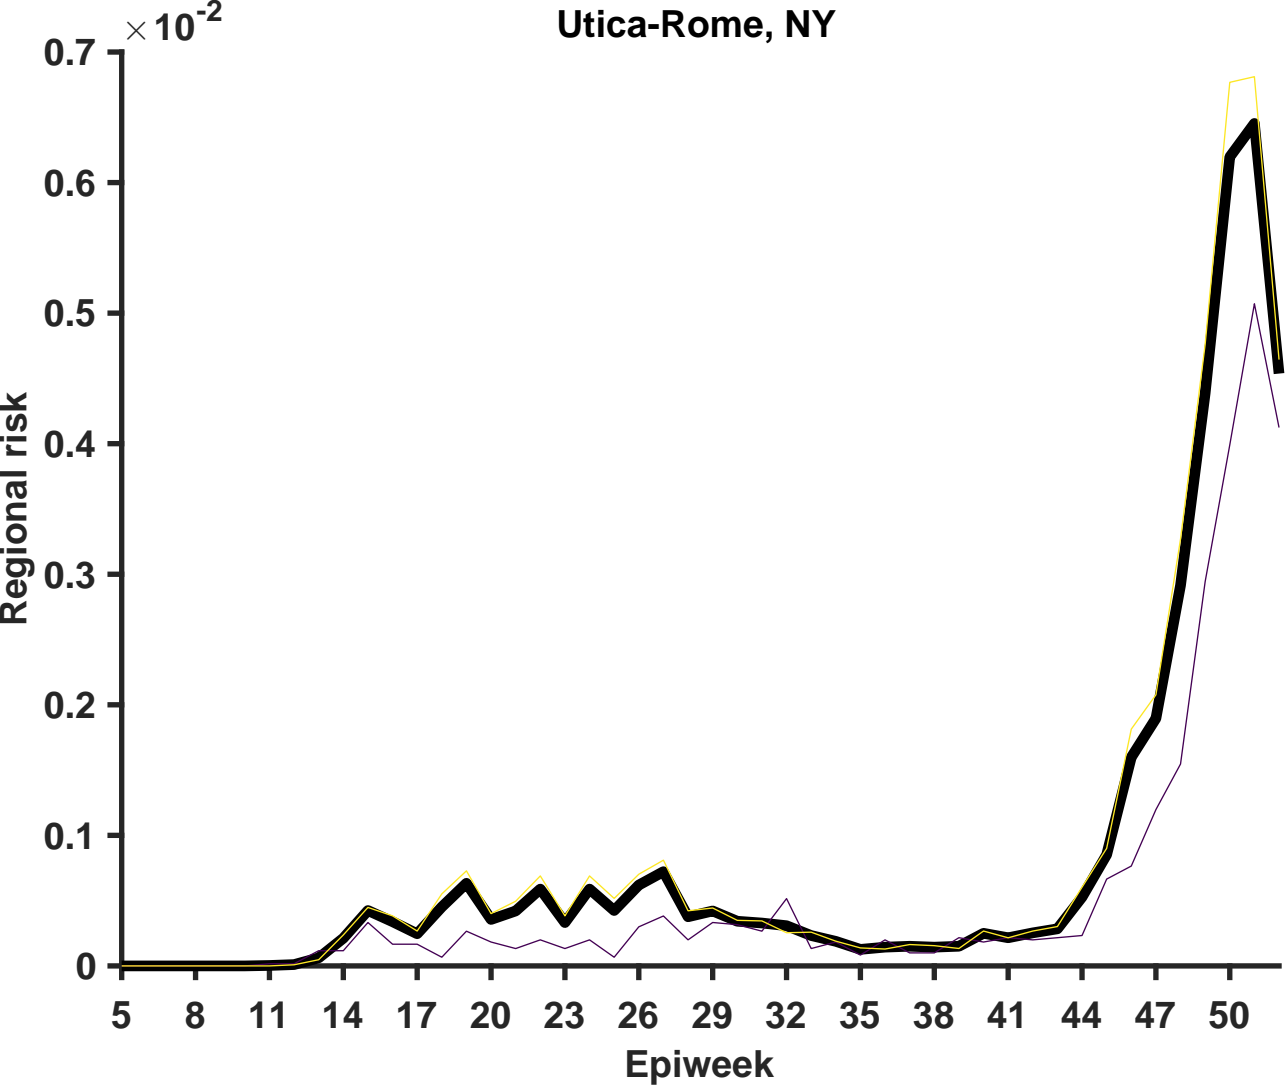

# Duluth, MN-WI

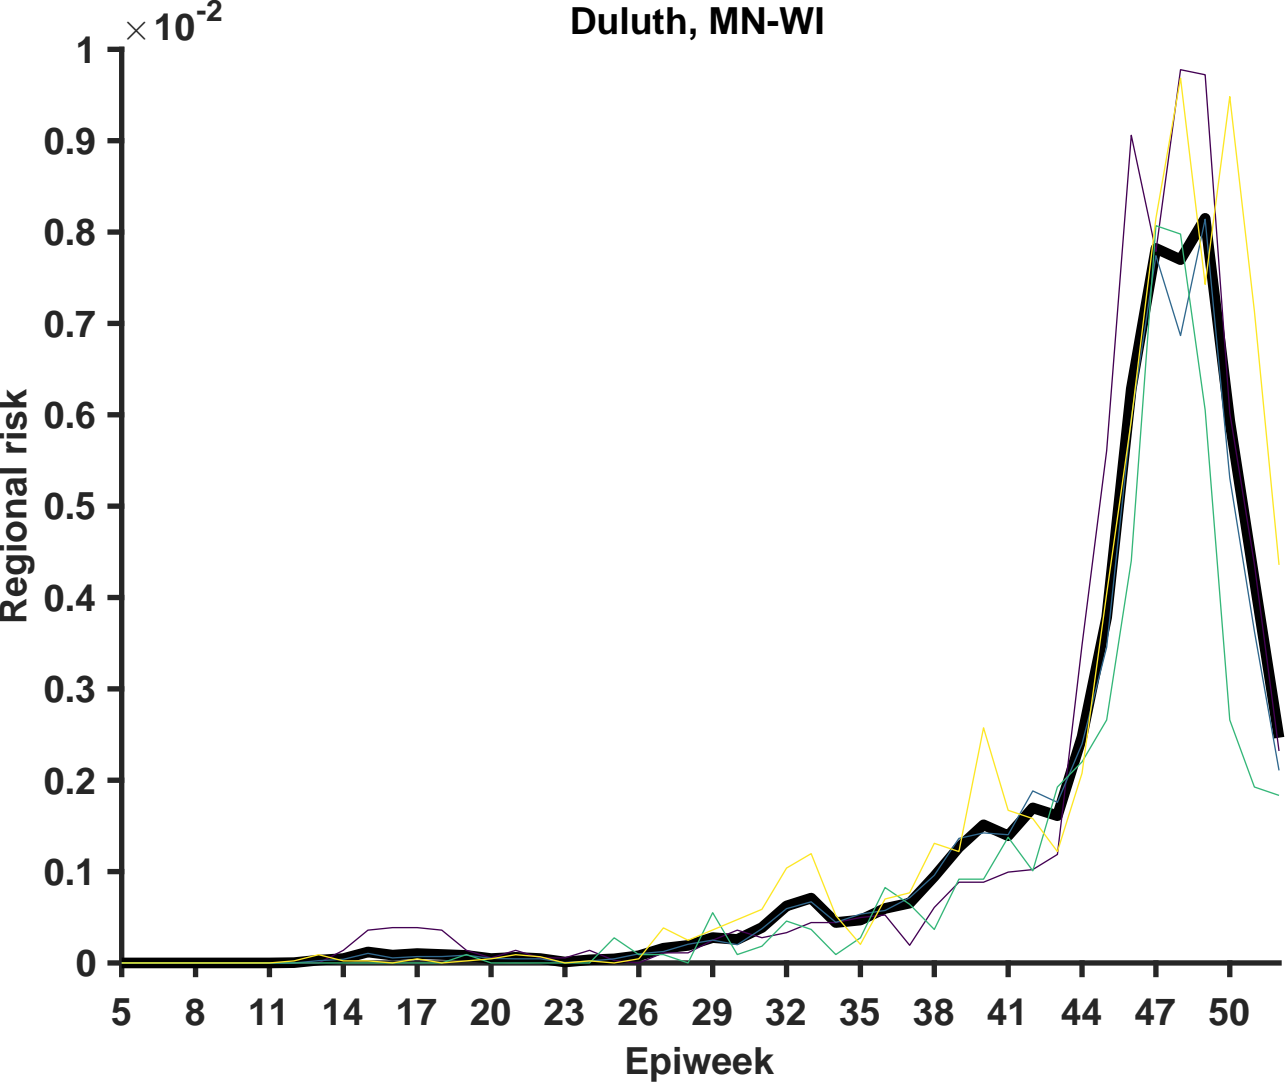

# Crestview-Fort Walton Beach-Destin, FL

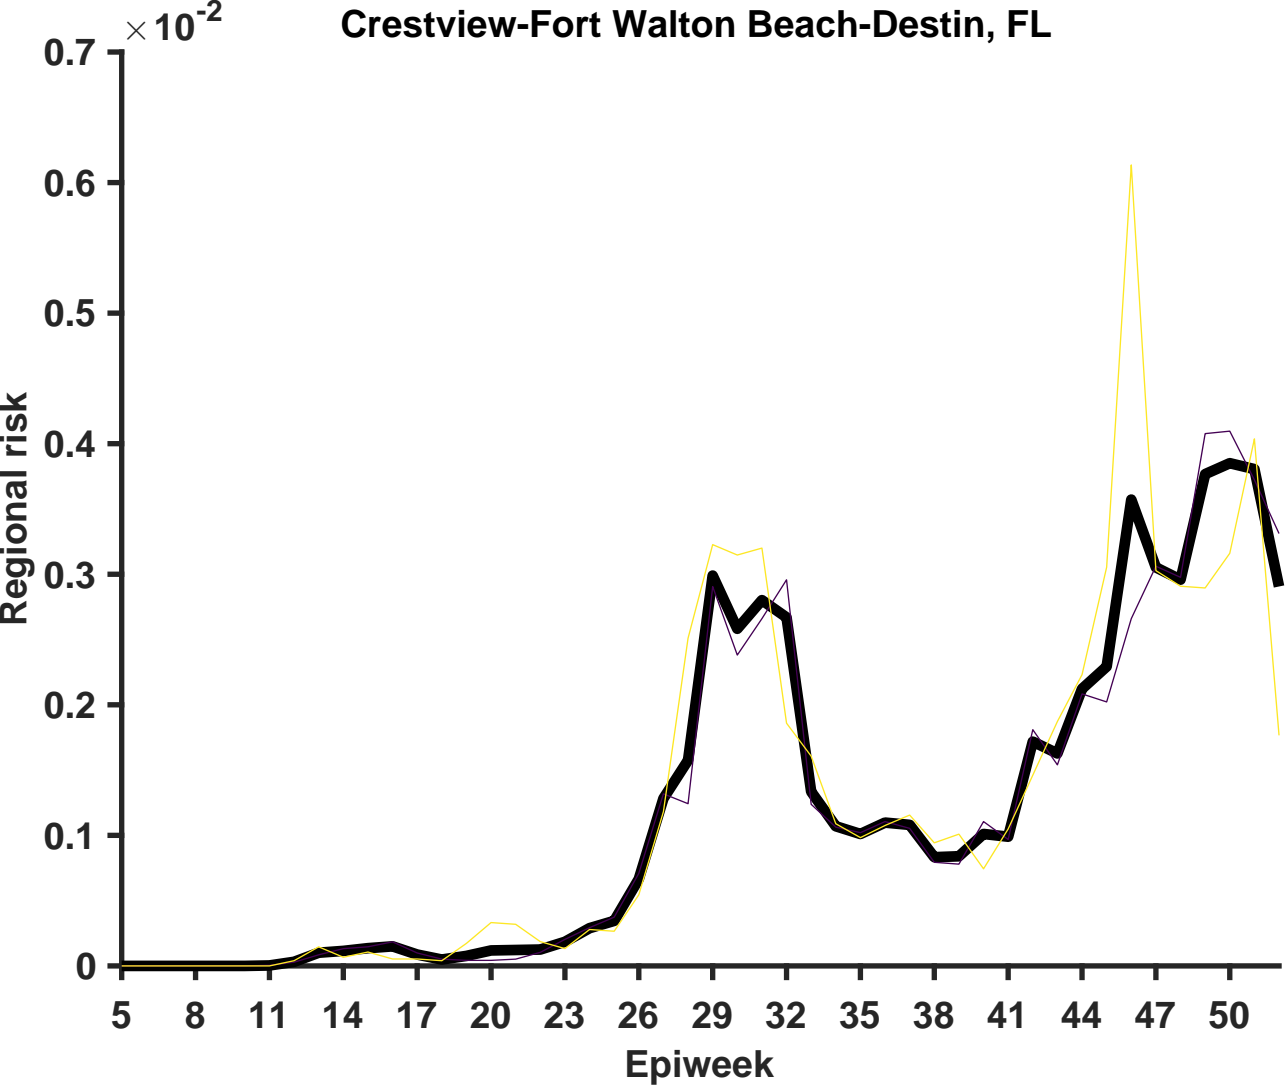

# Longview, TX

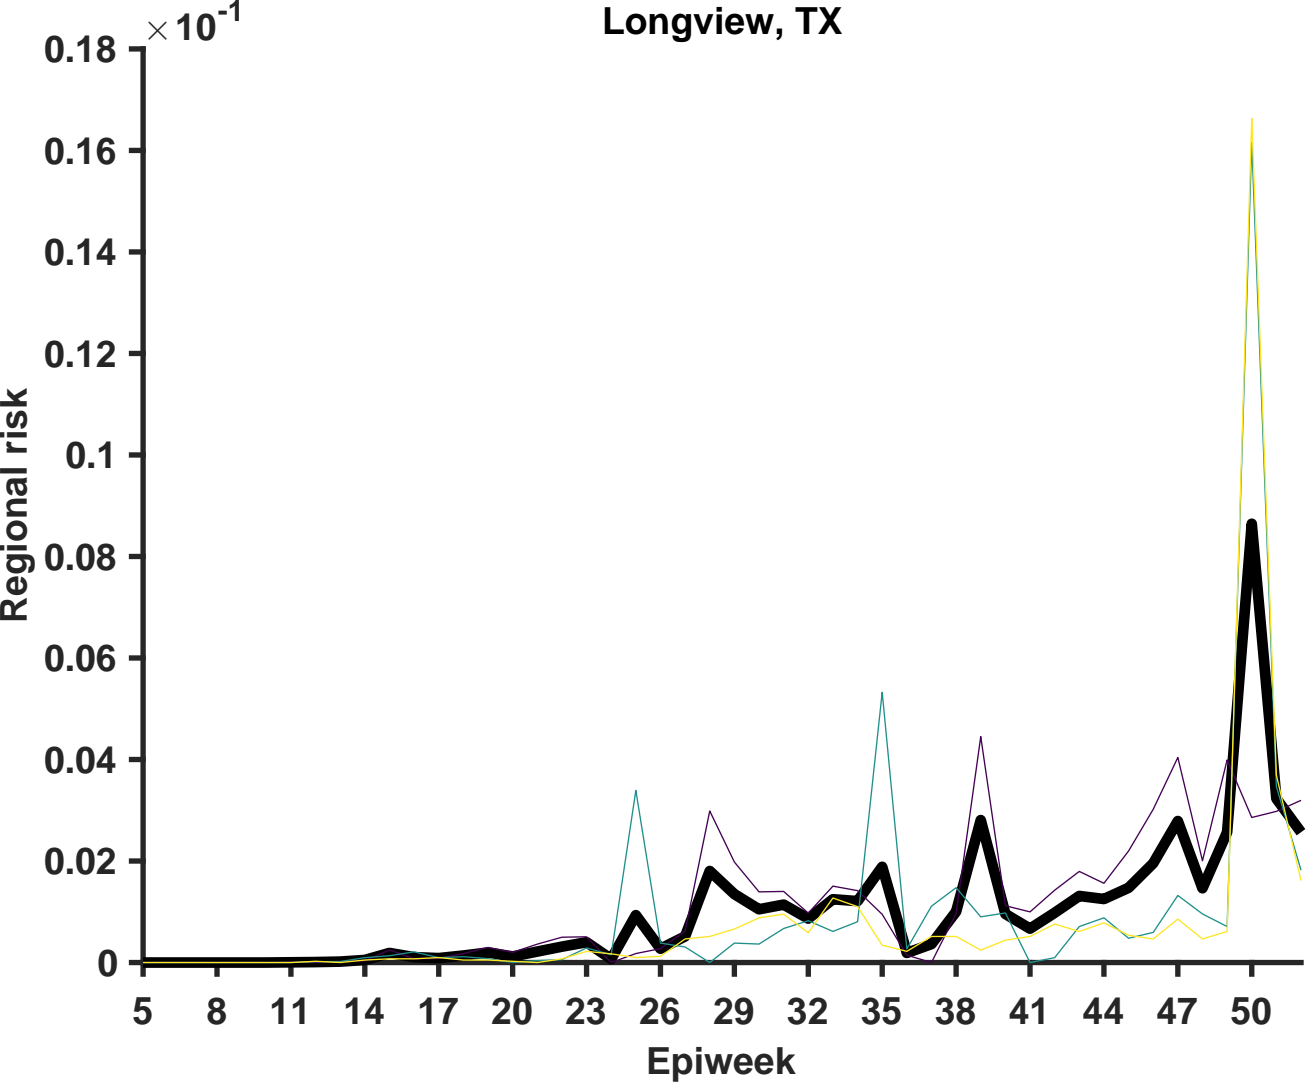

# Wilmington, NC

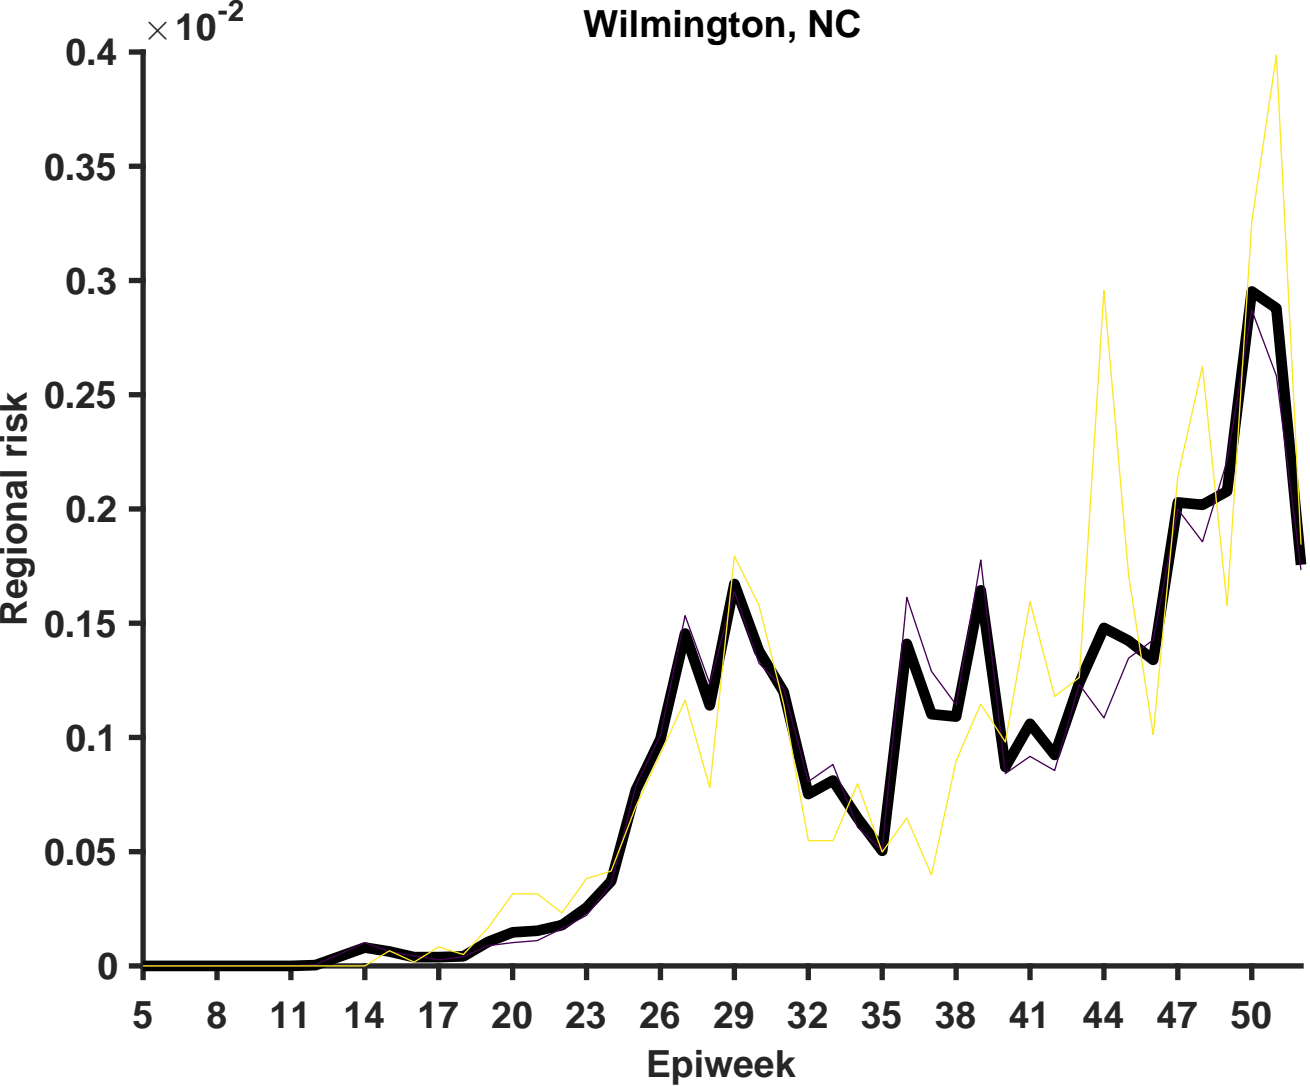

# Sioux Falls, SD

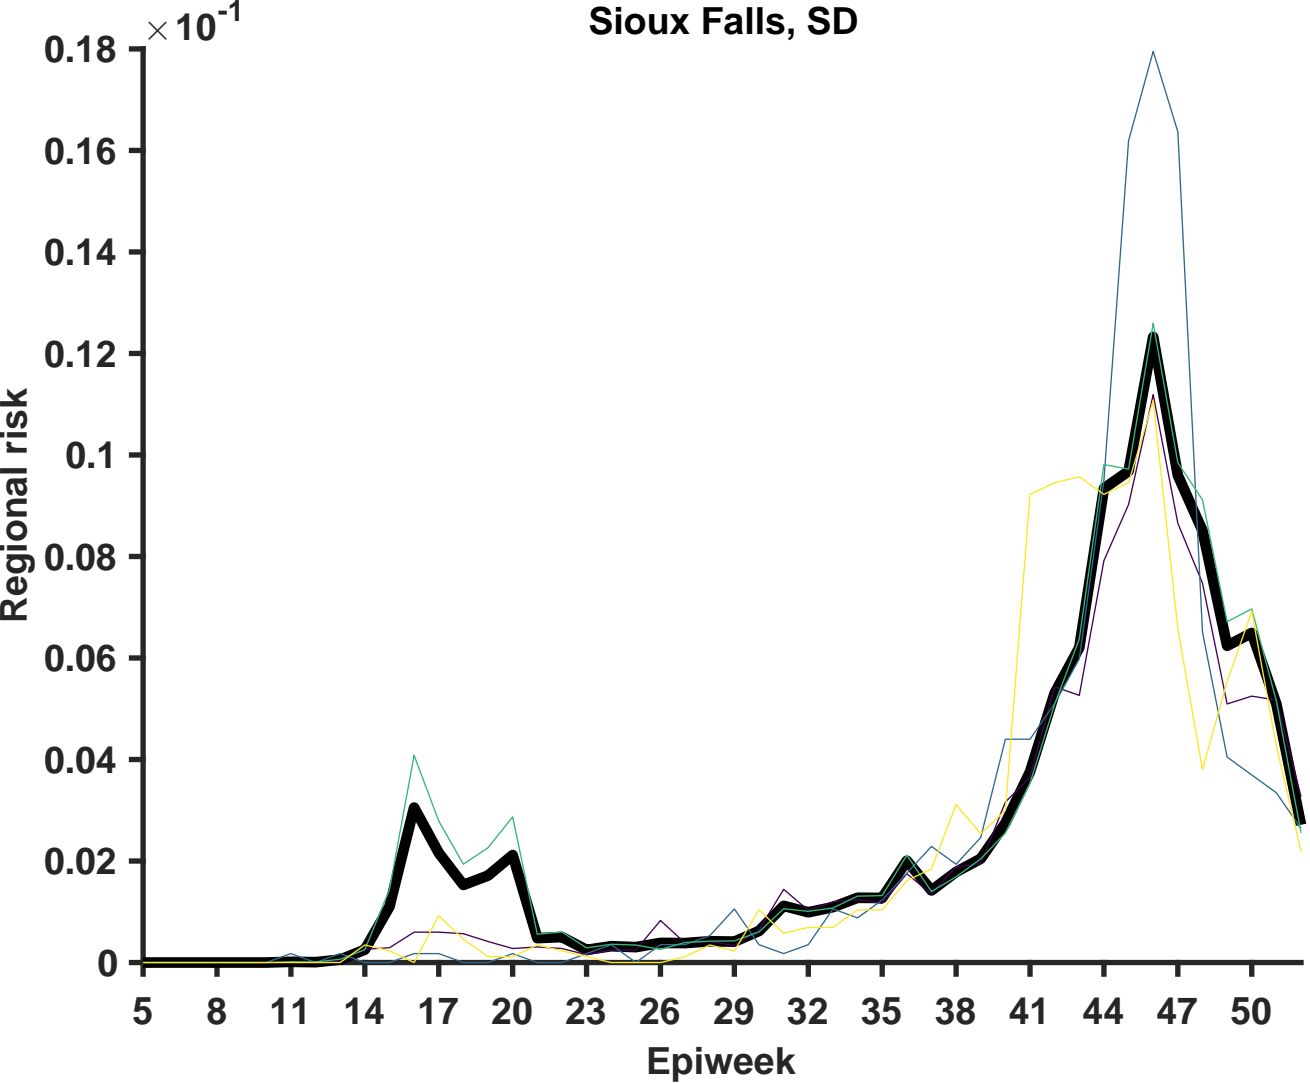

# Cedar Rapids, IA

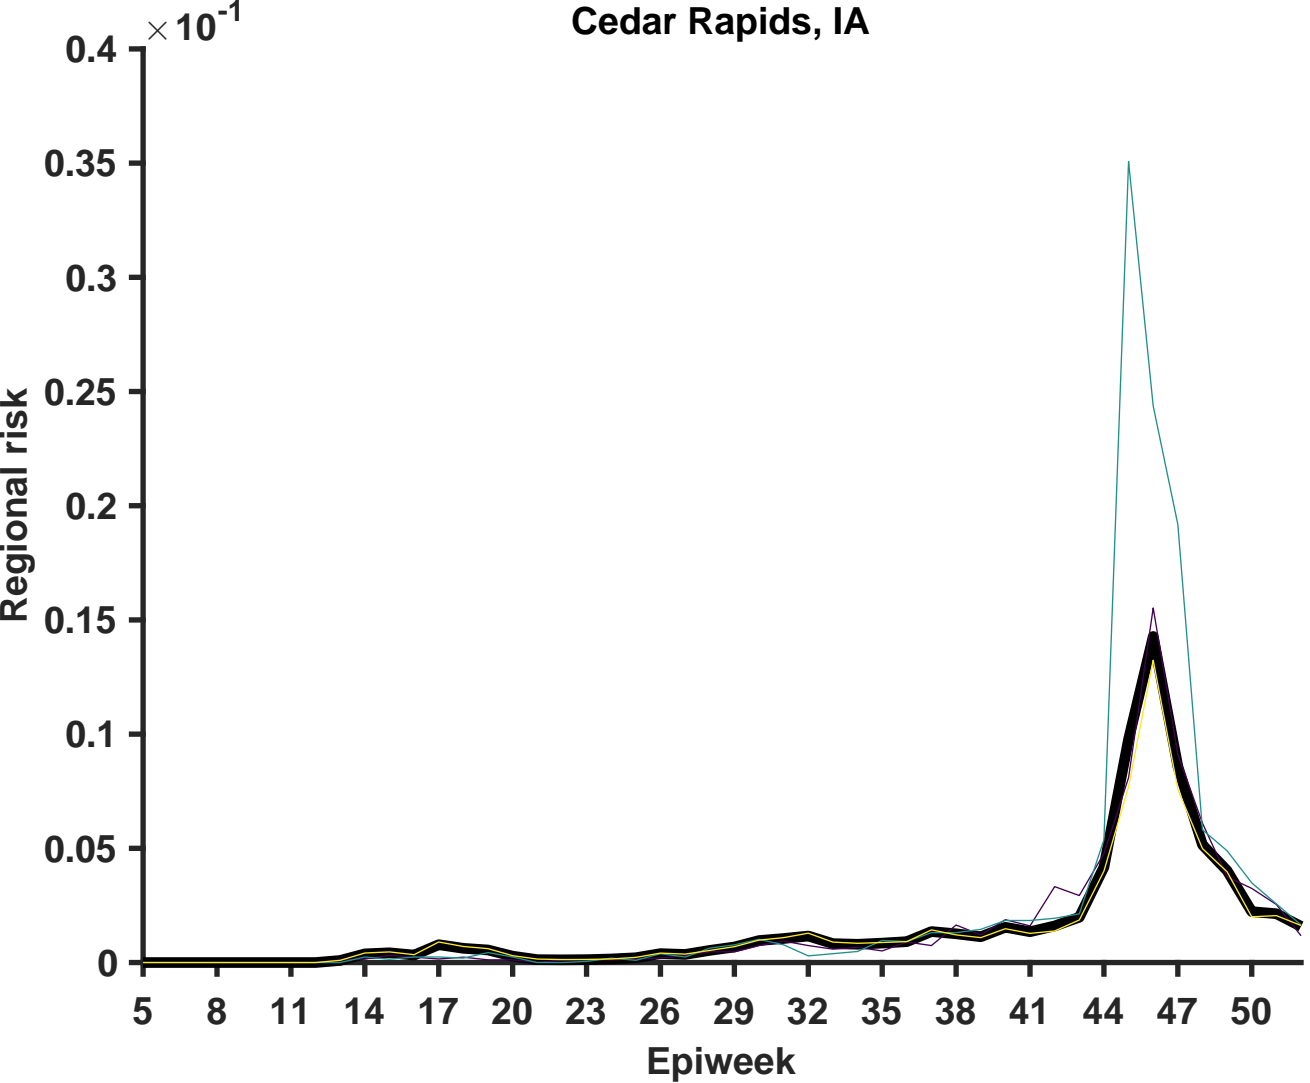

# Amarillo, TX

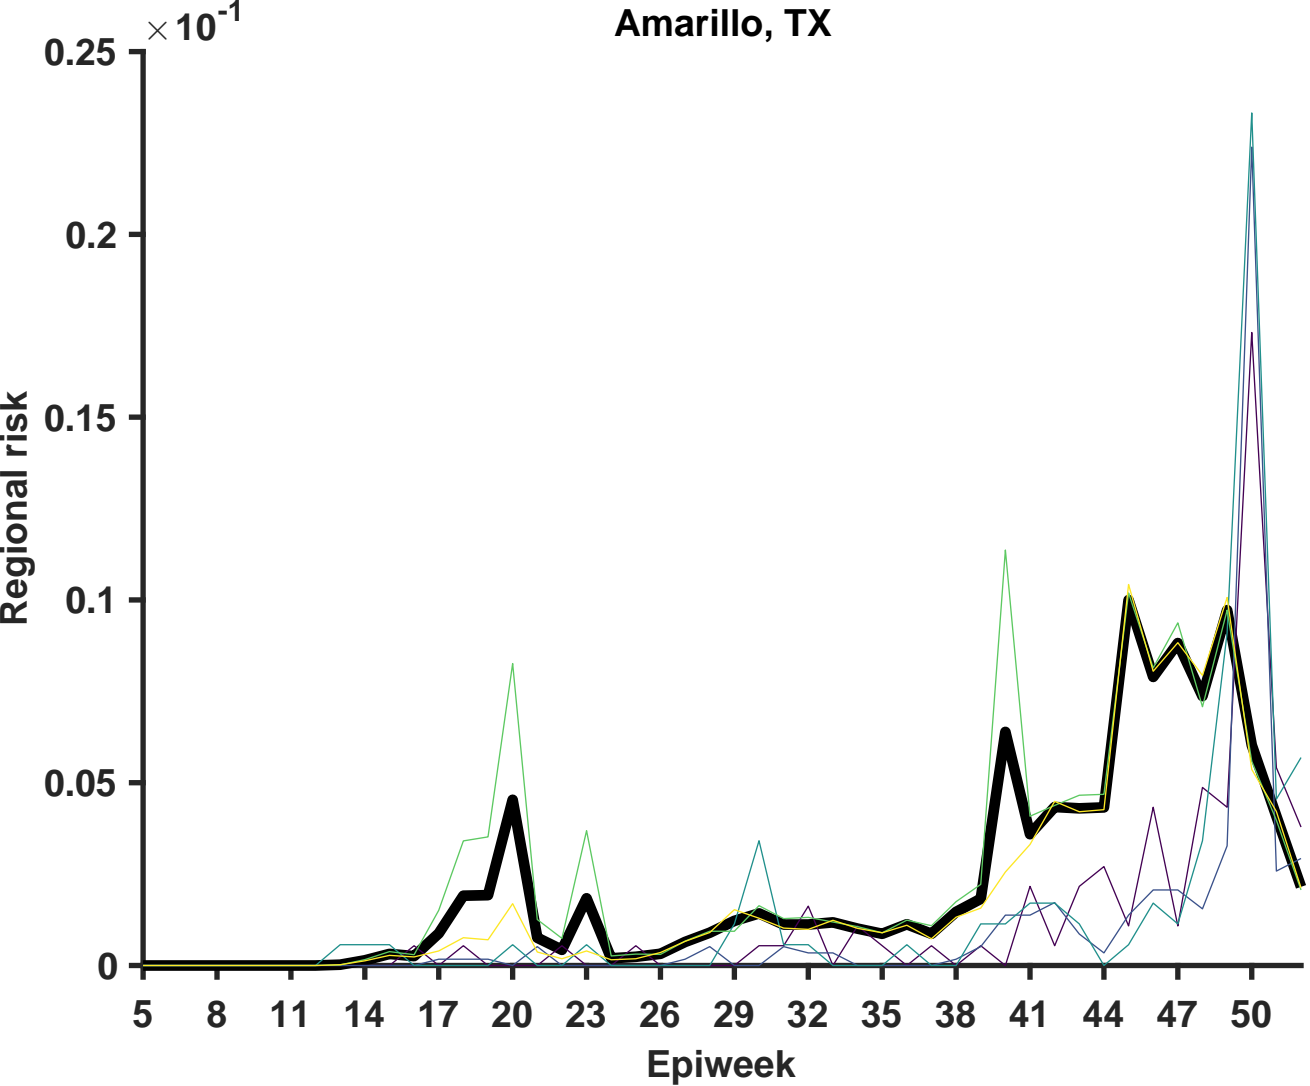



# Tuscaloosa, AL

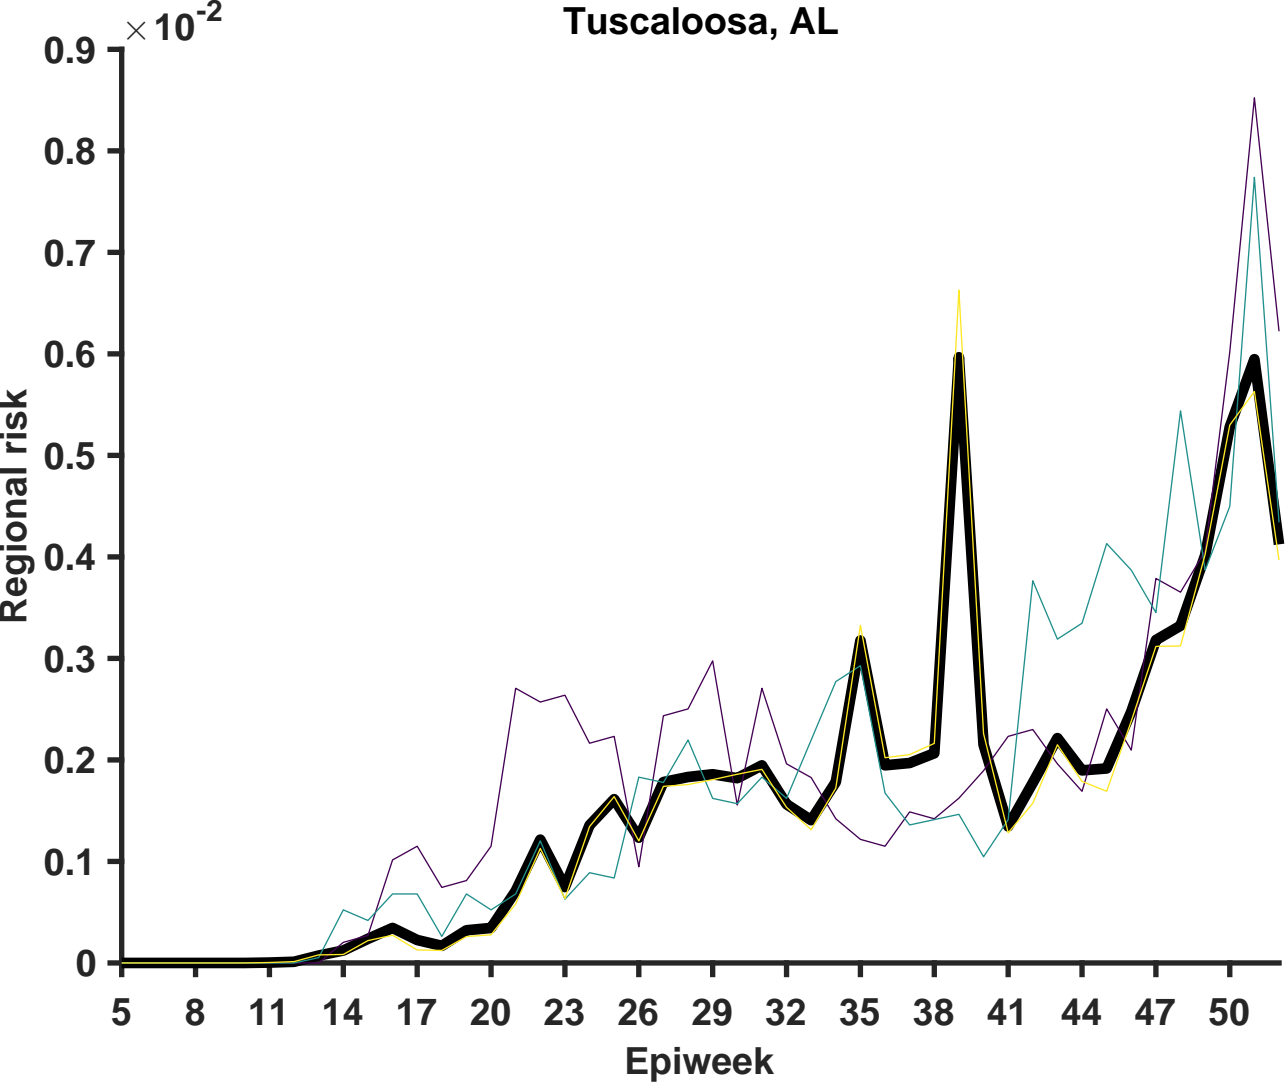

# College Station-Bryan, TX

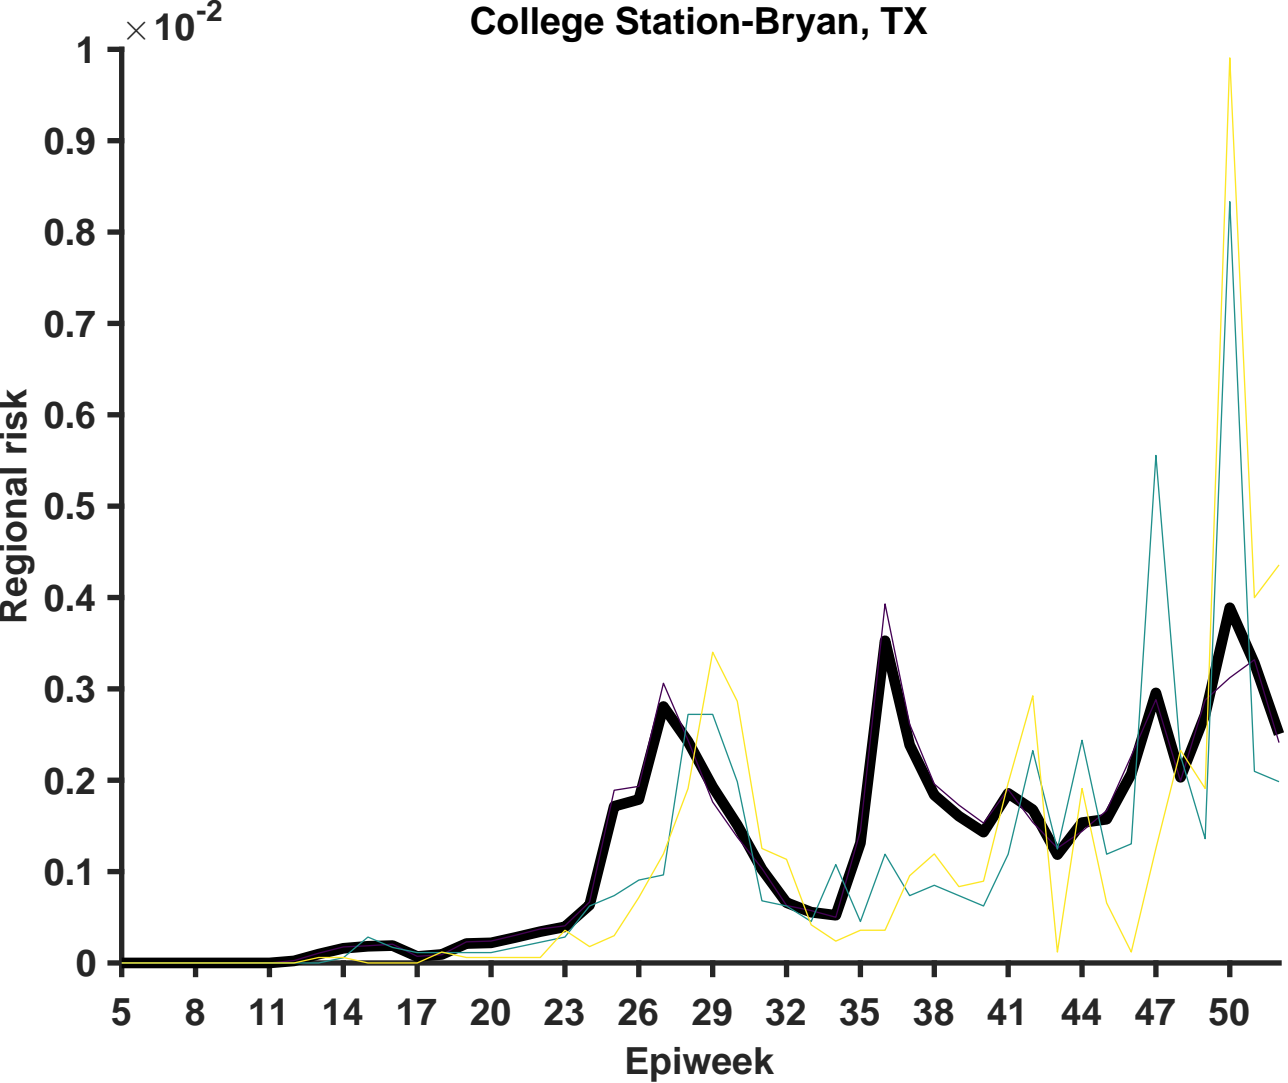

# Kalamazoo-Portage, MI

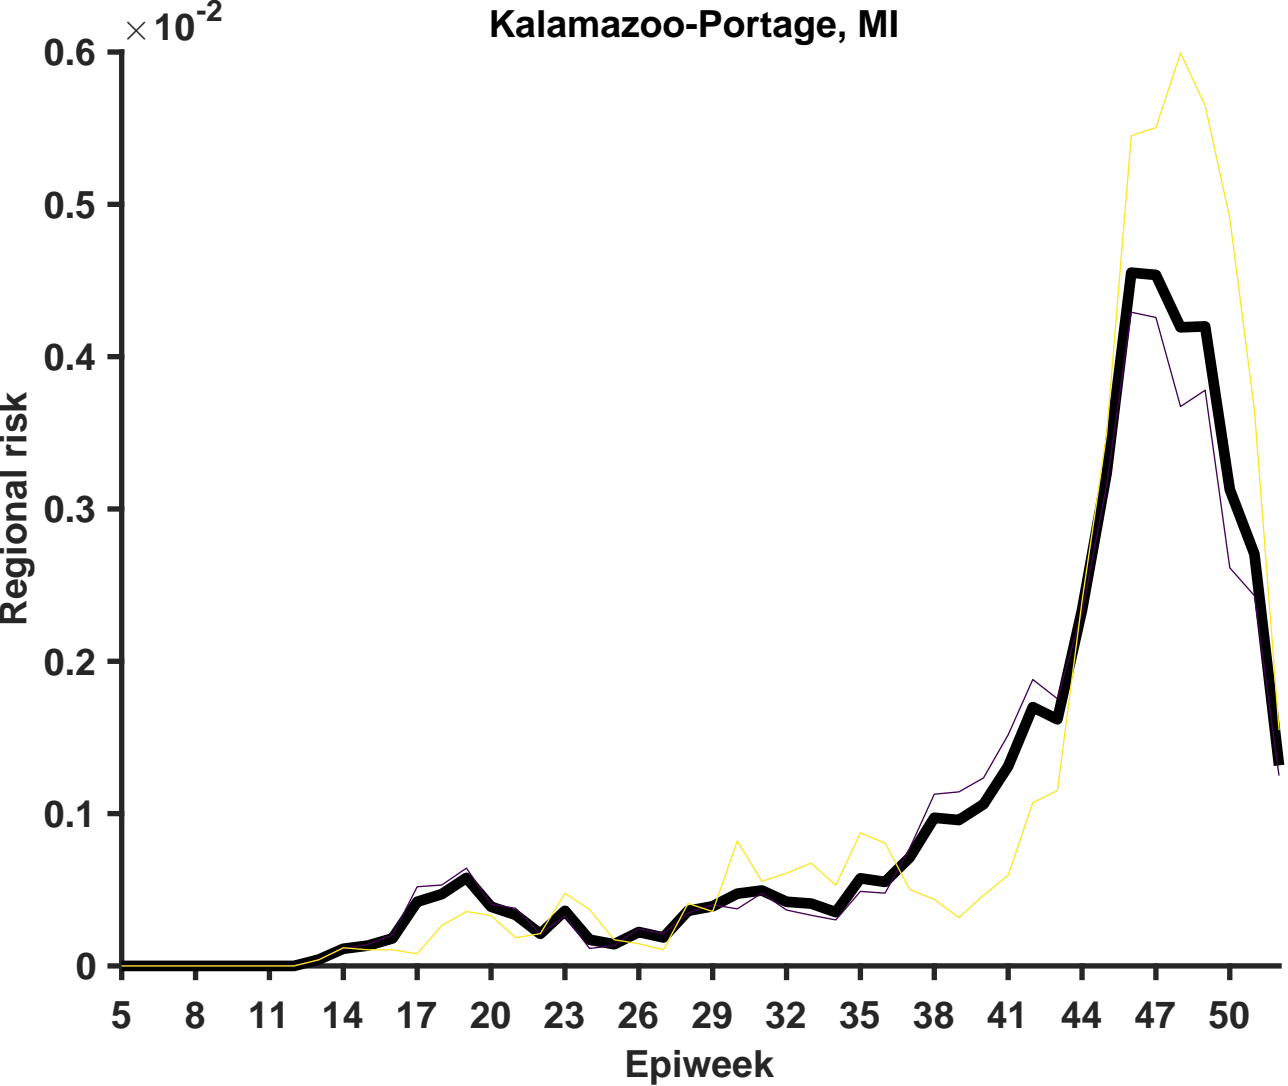

# Lynchburg, VA

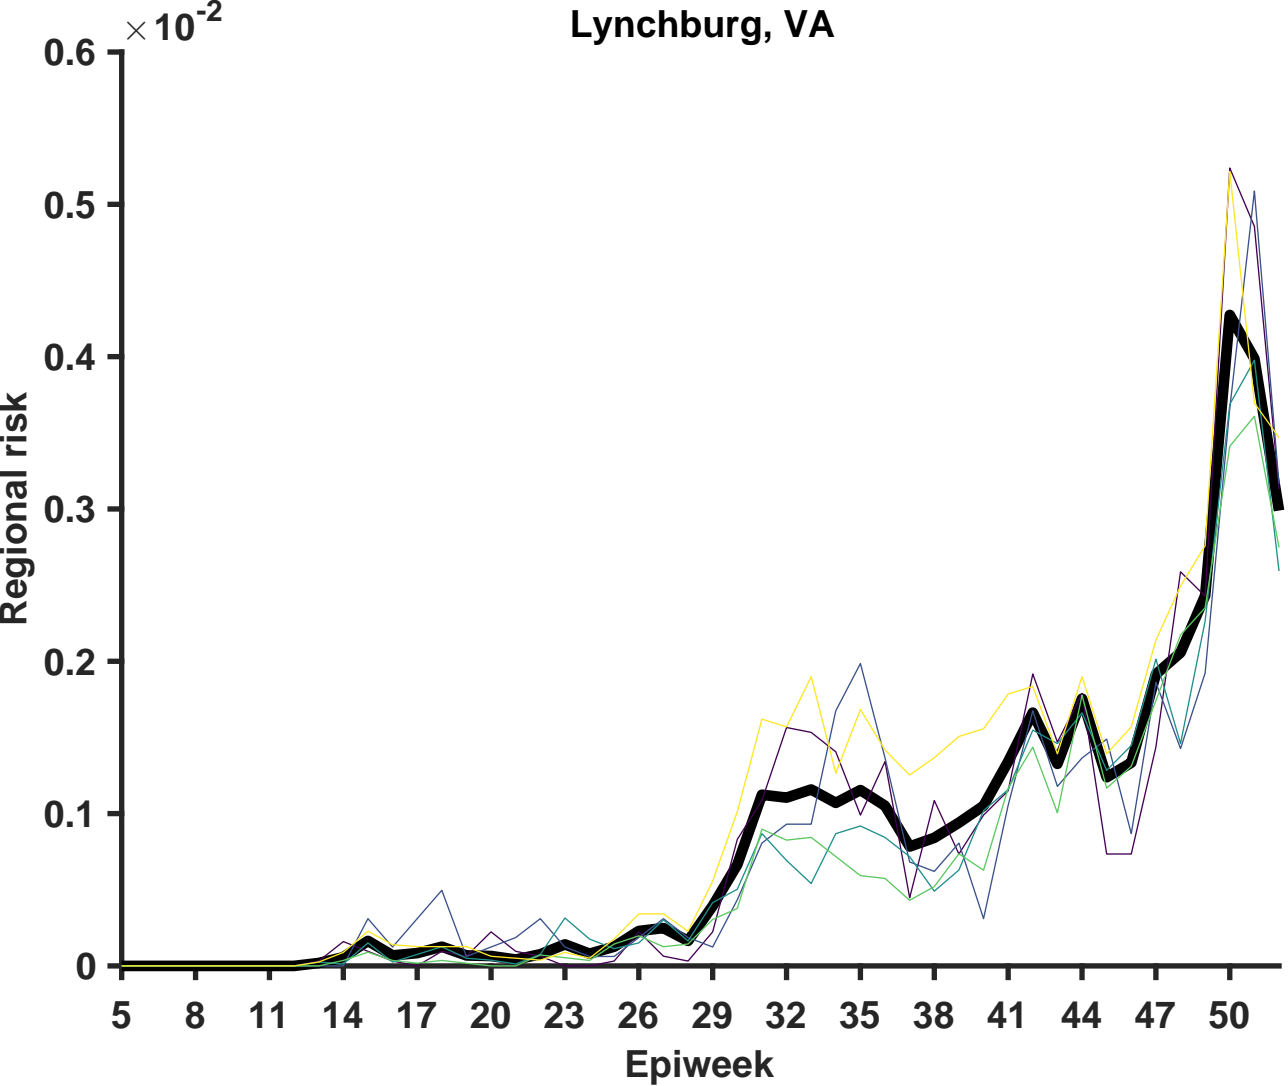

# Charleston, WV

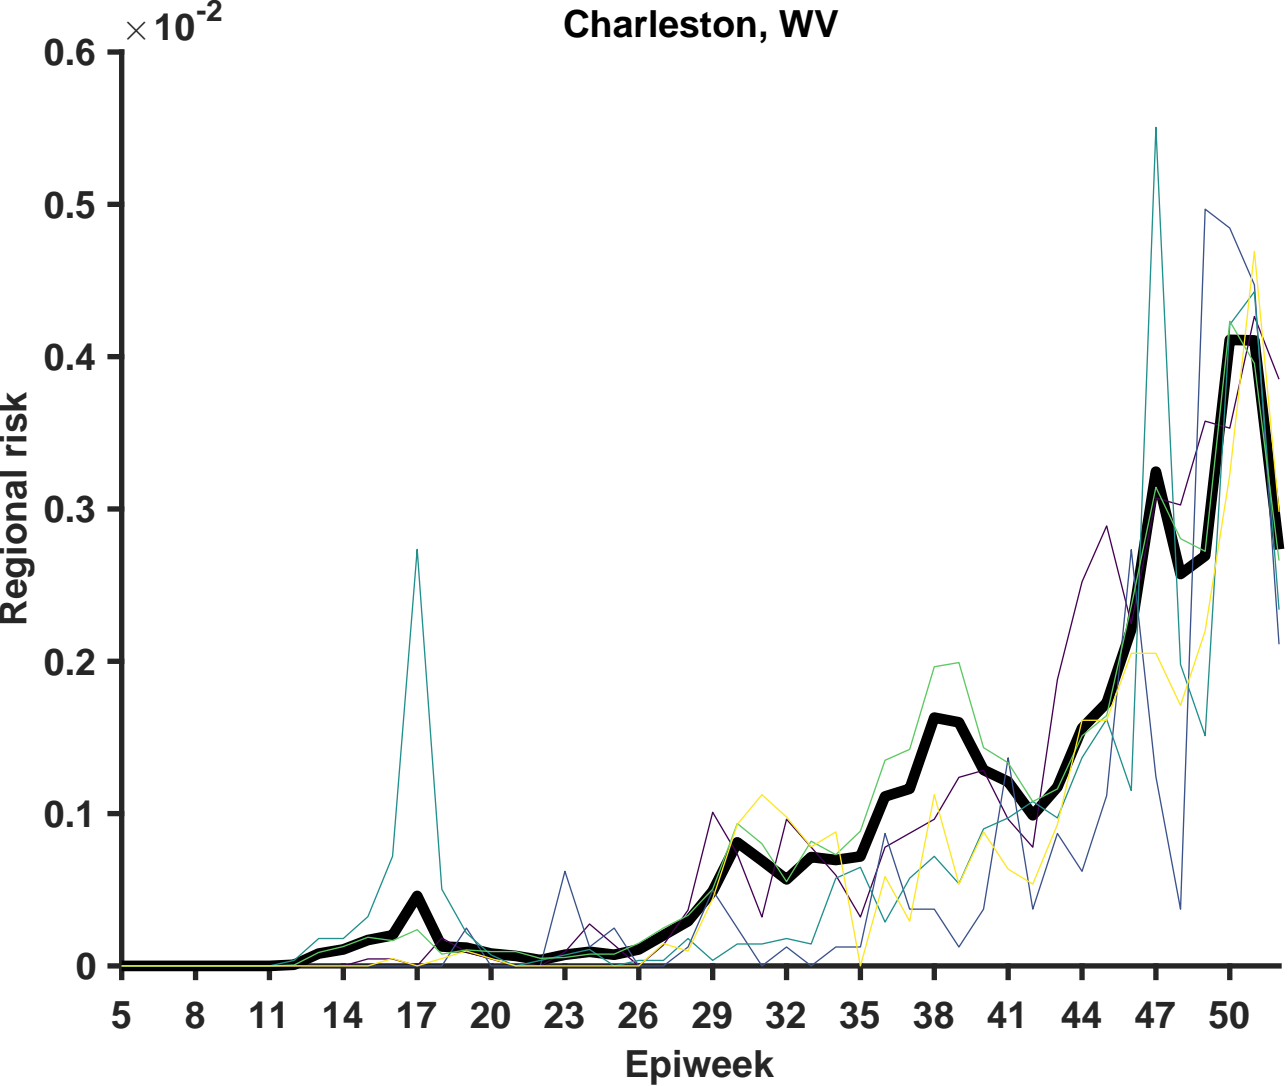

# Fargo, ND-MN

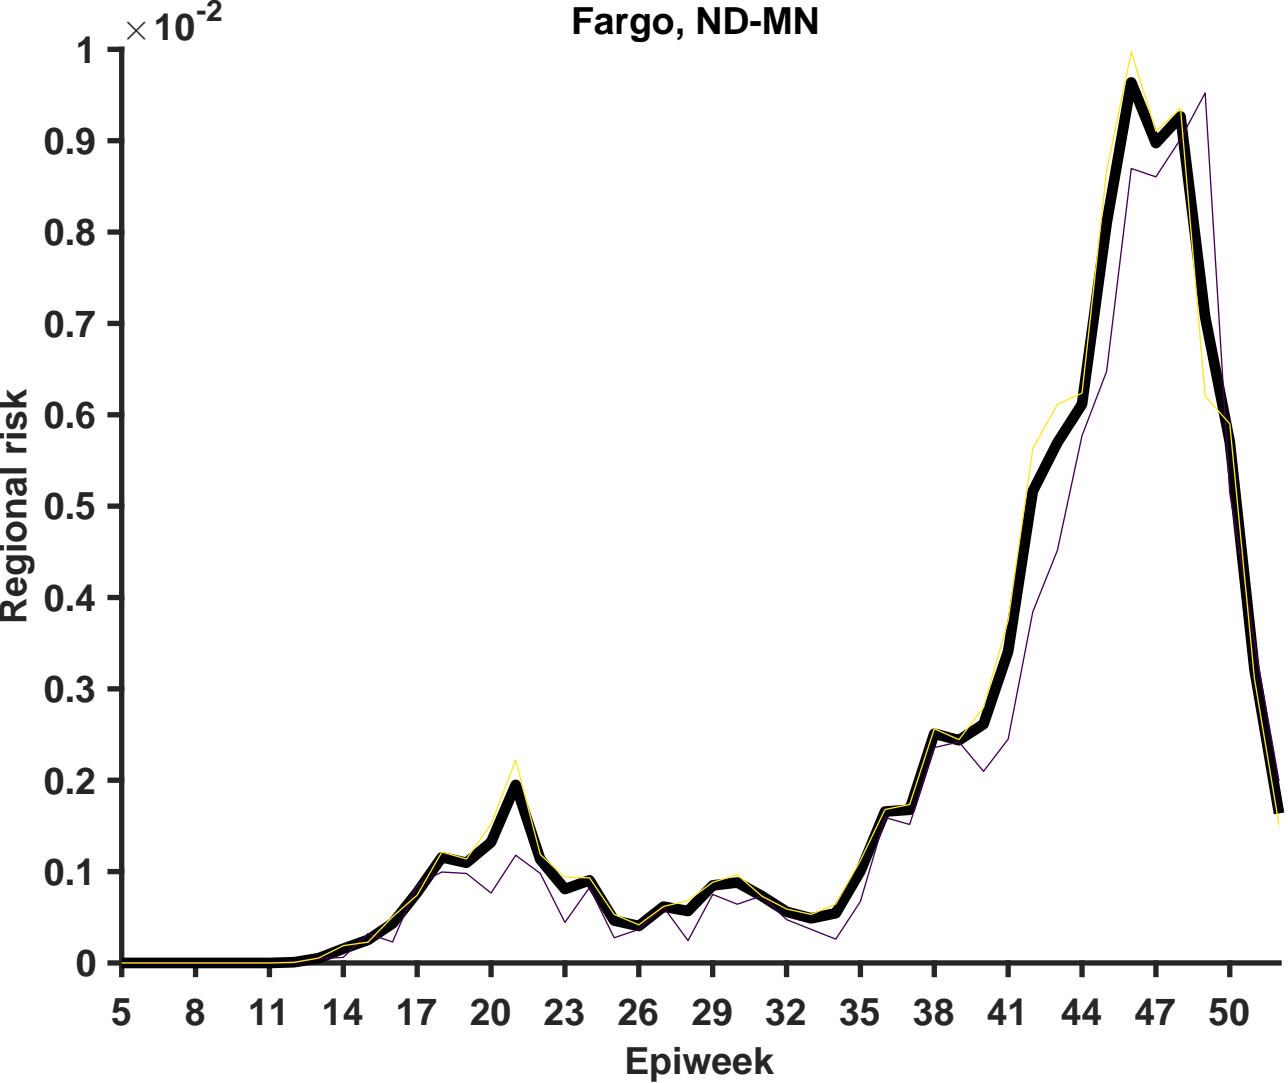

# Binghamton, NY

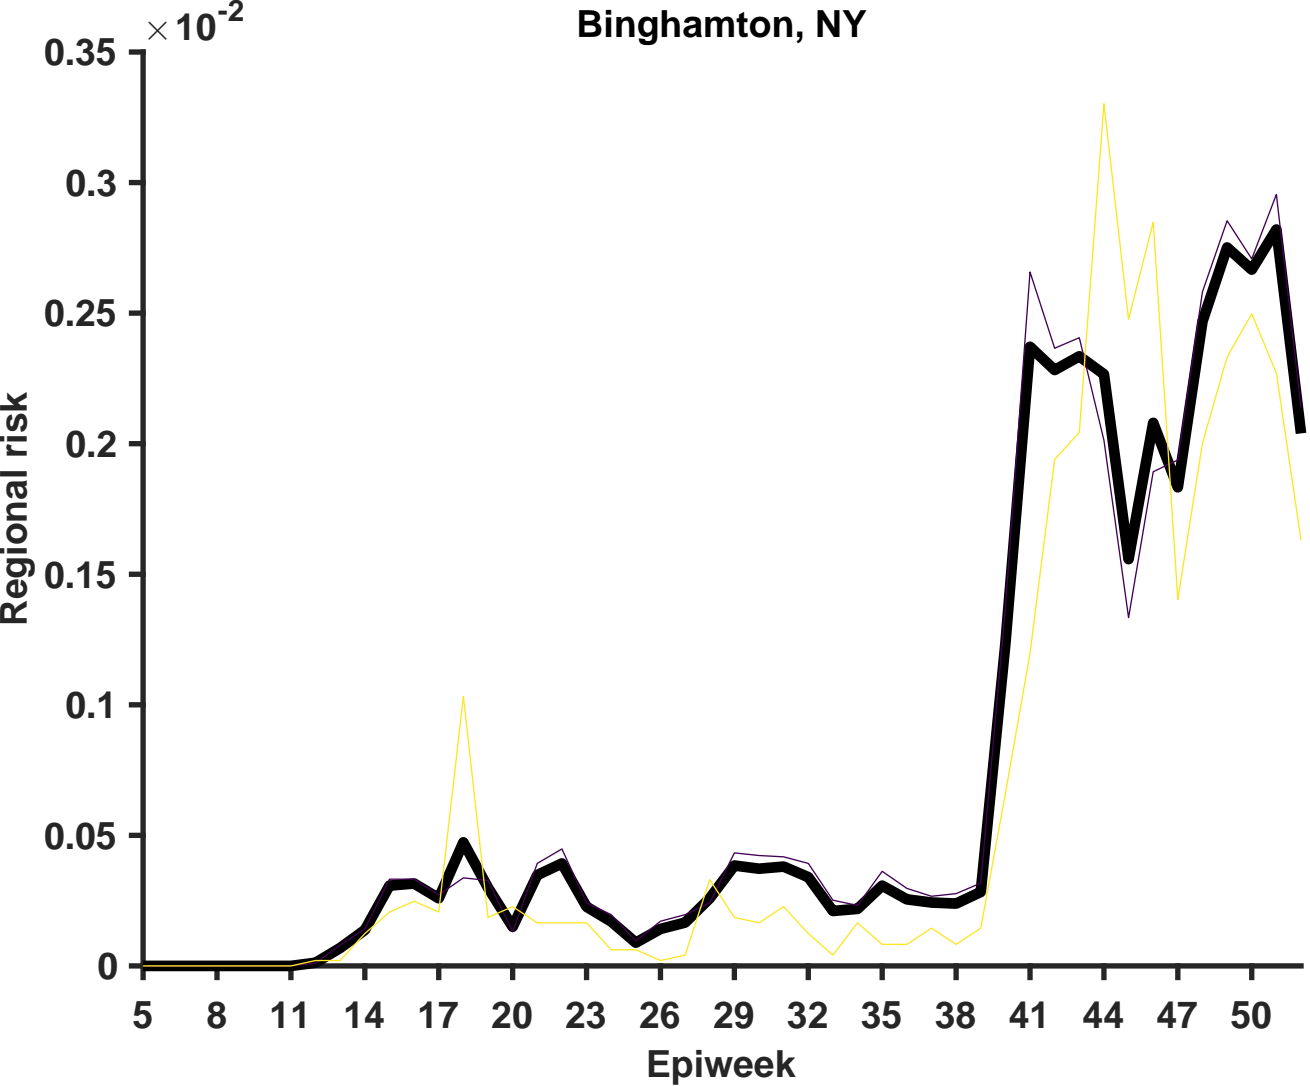

# Fort Smith, AR-OK

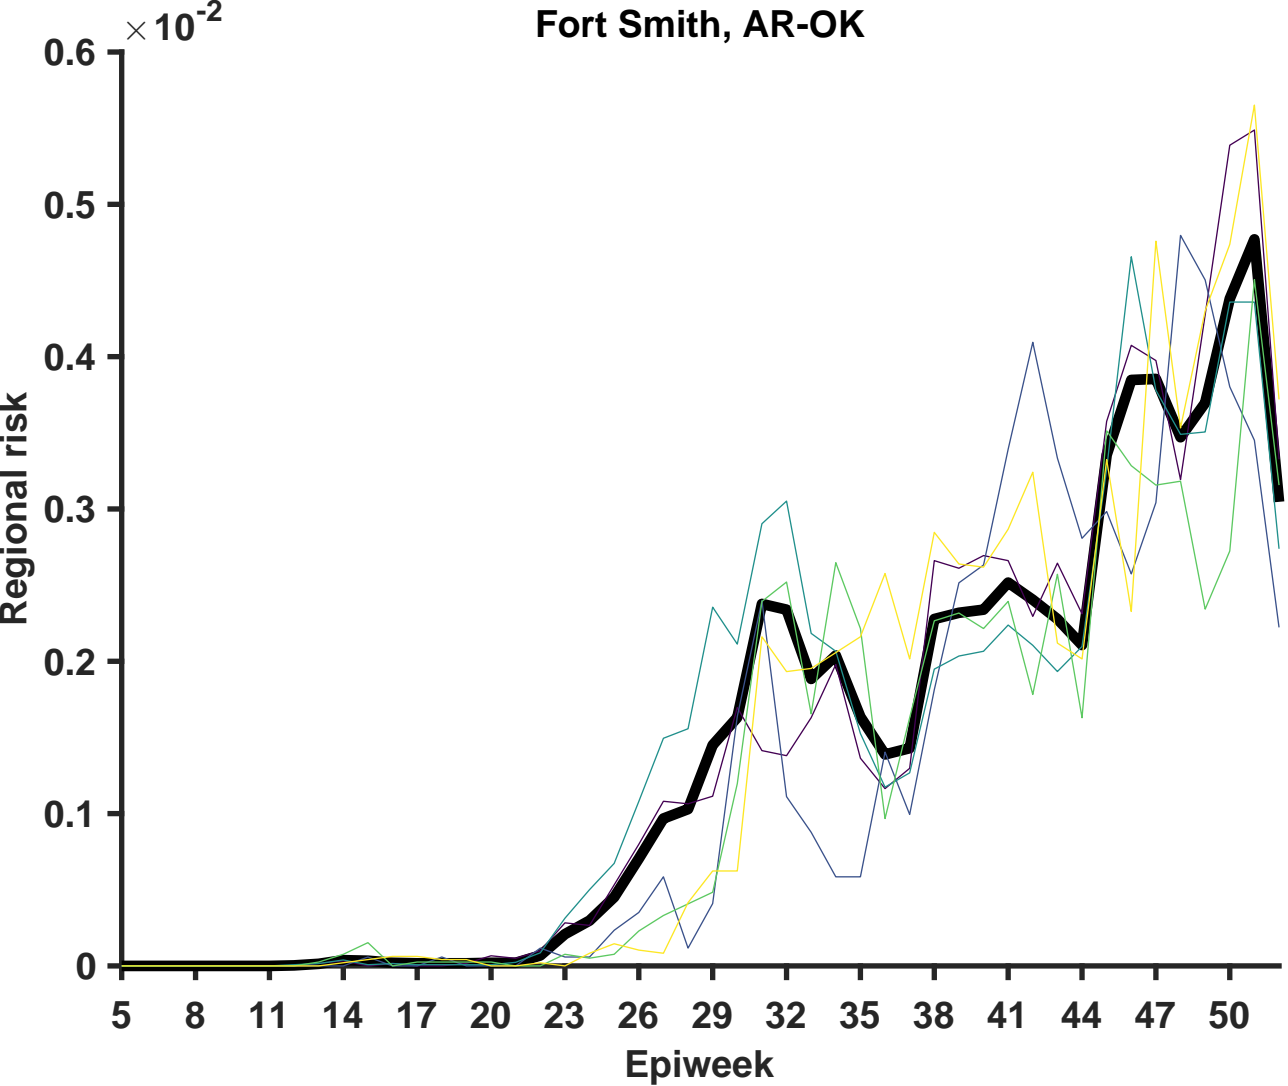



# Appleton, WI

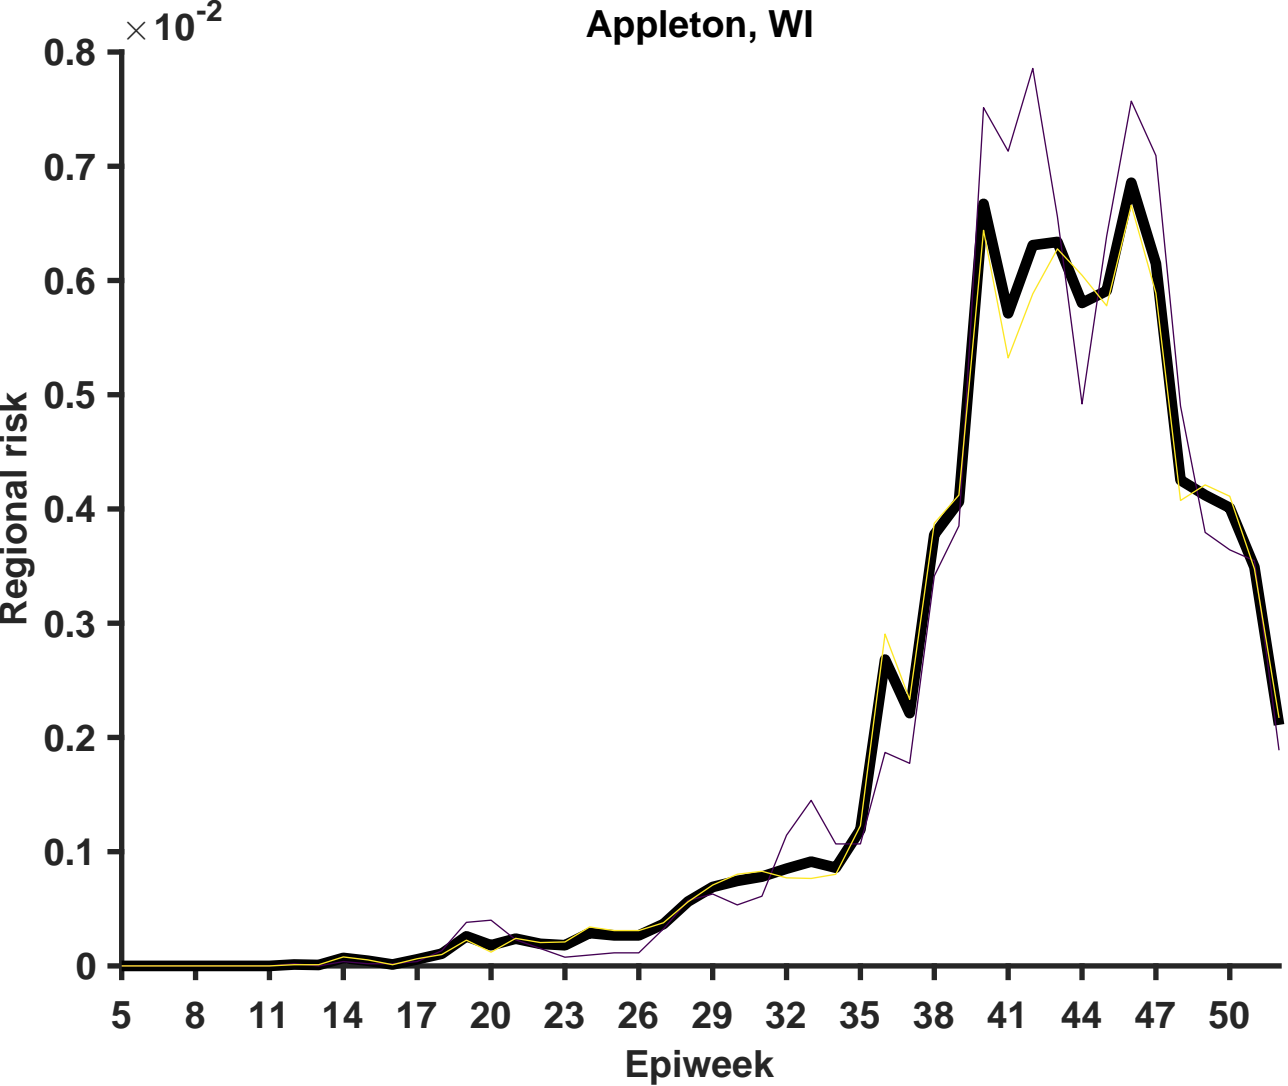

# Macon-Bibb County, GA

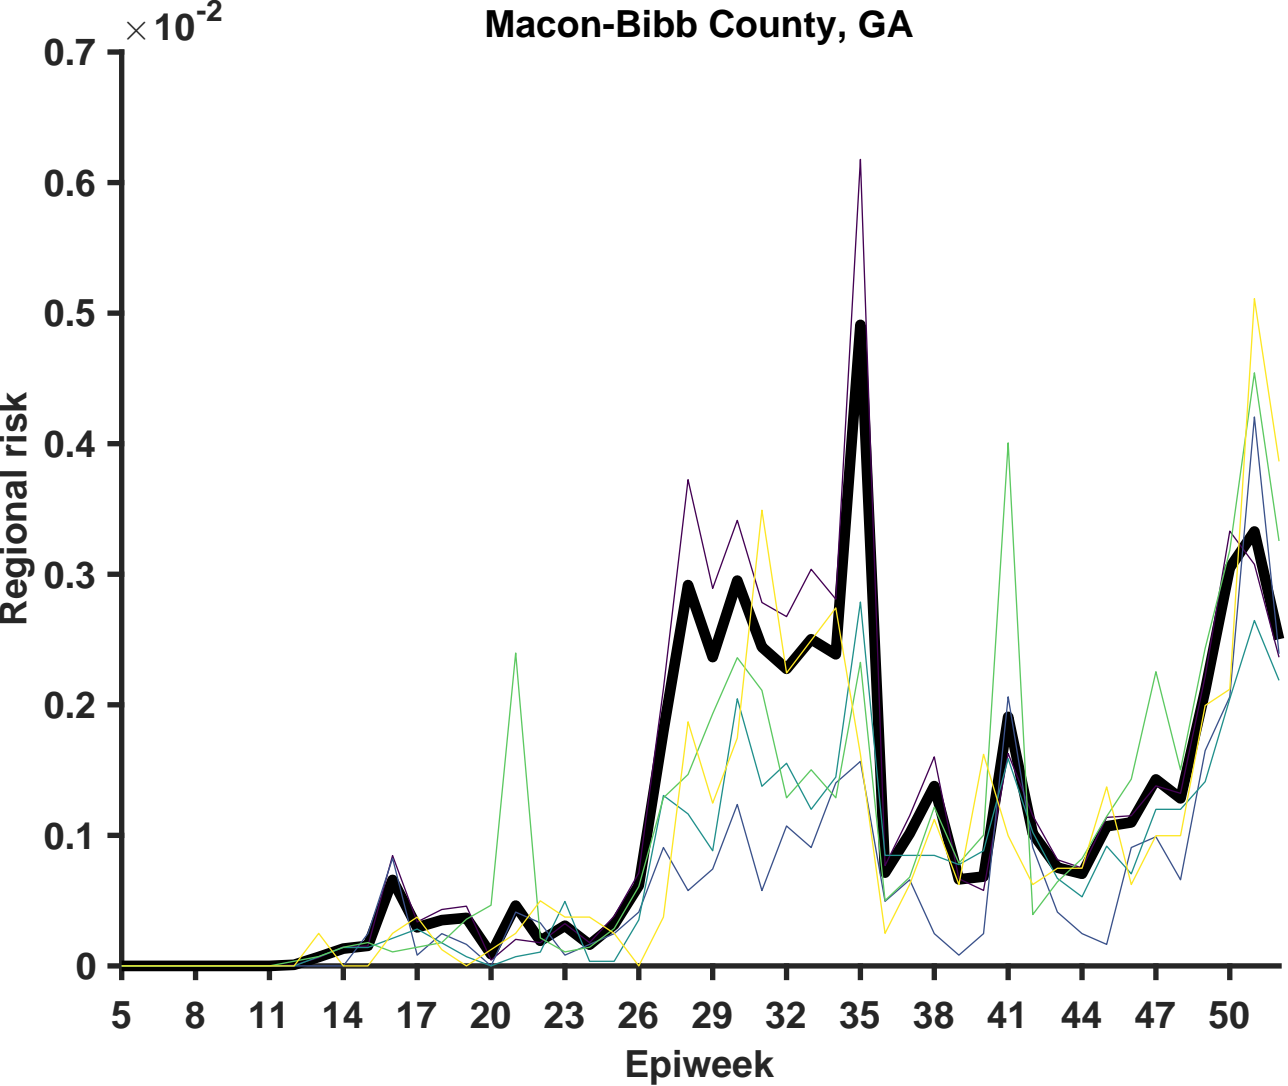

# Topeka, KS

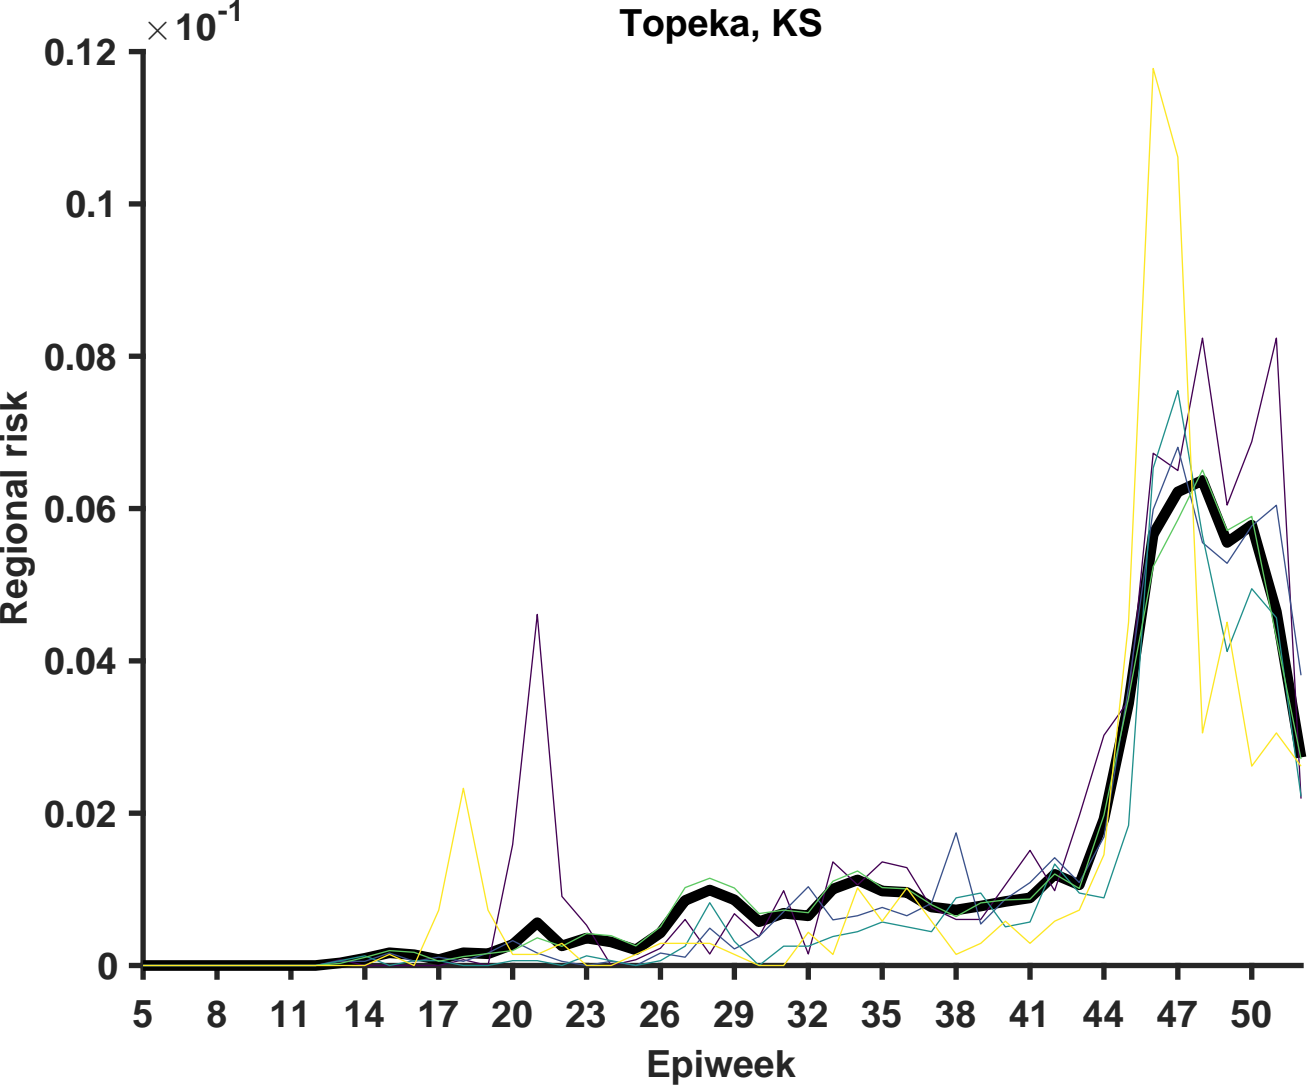

# Rochester, MN

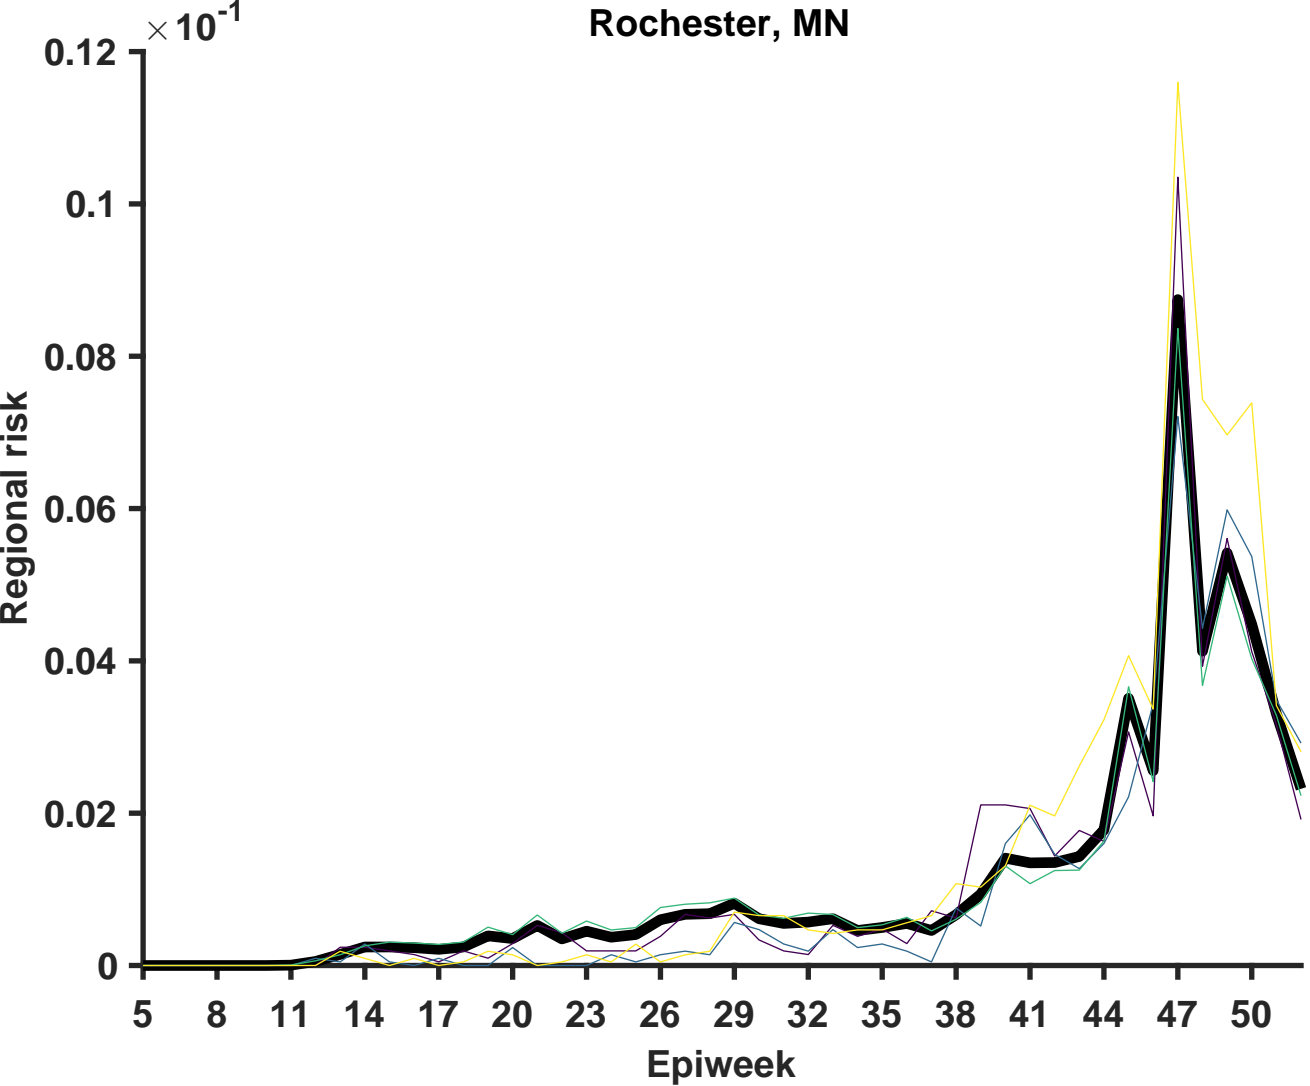

# Burlington-South Burlington, VT

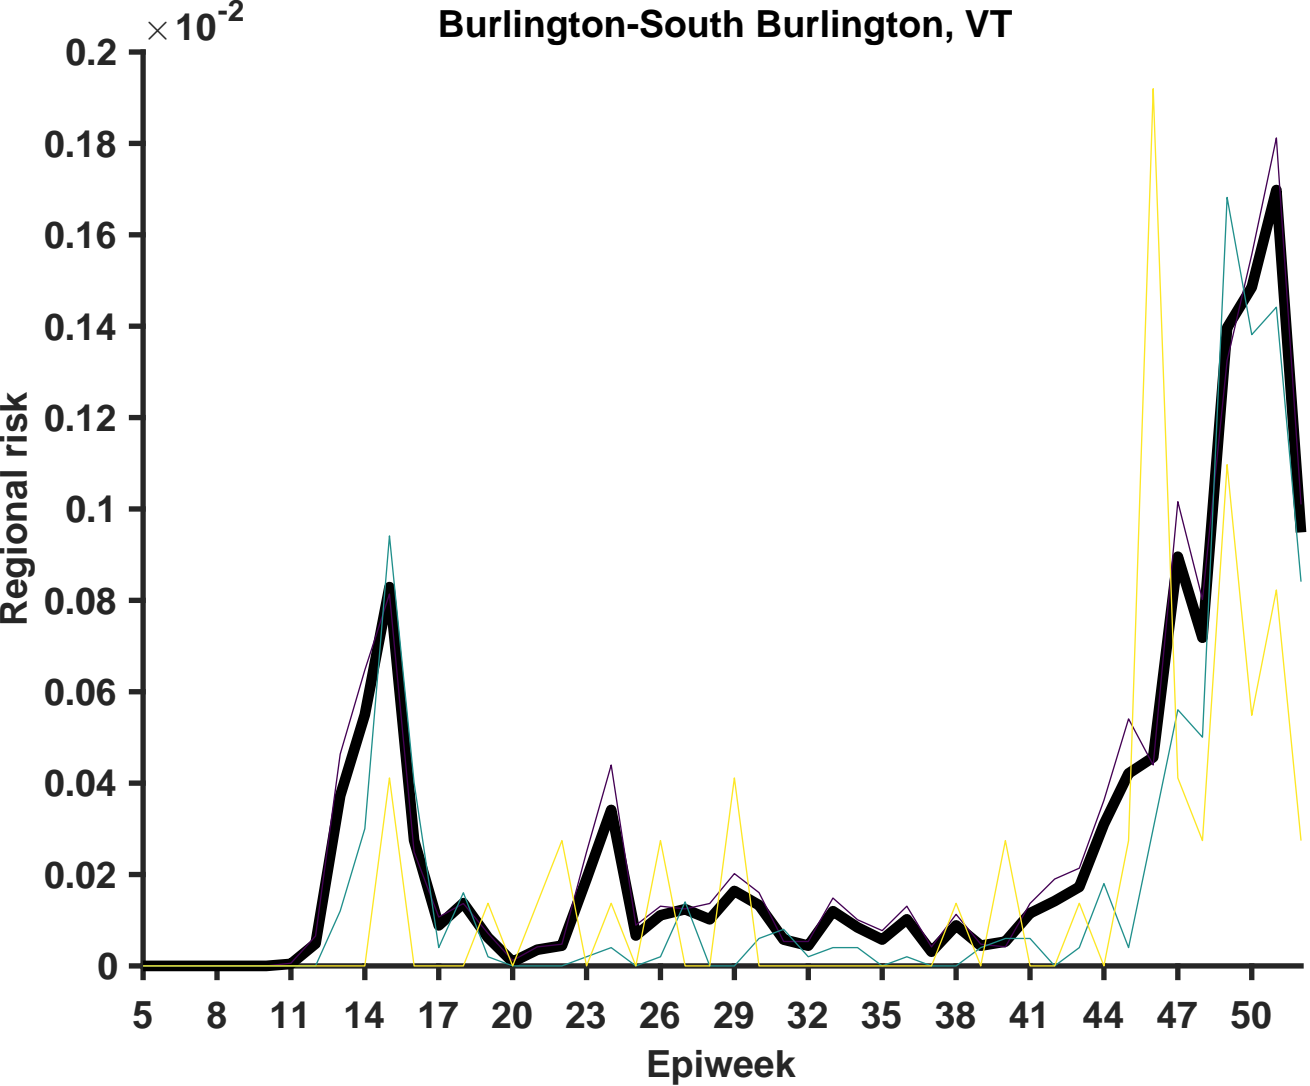

# Lafayette-West Lafayette, IN

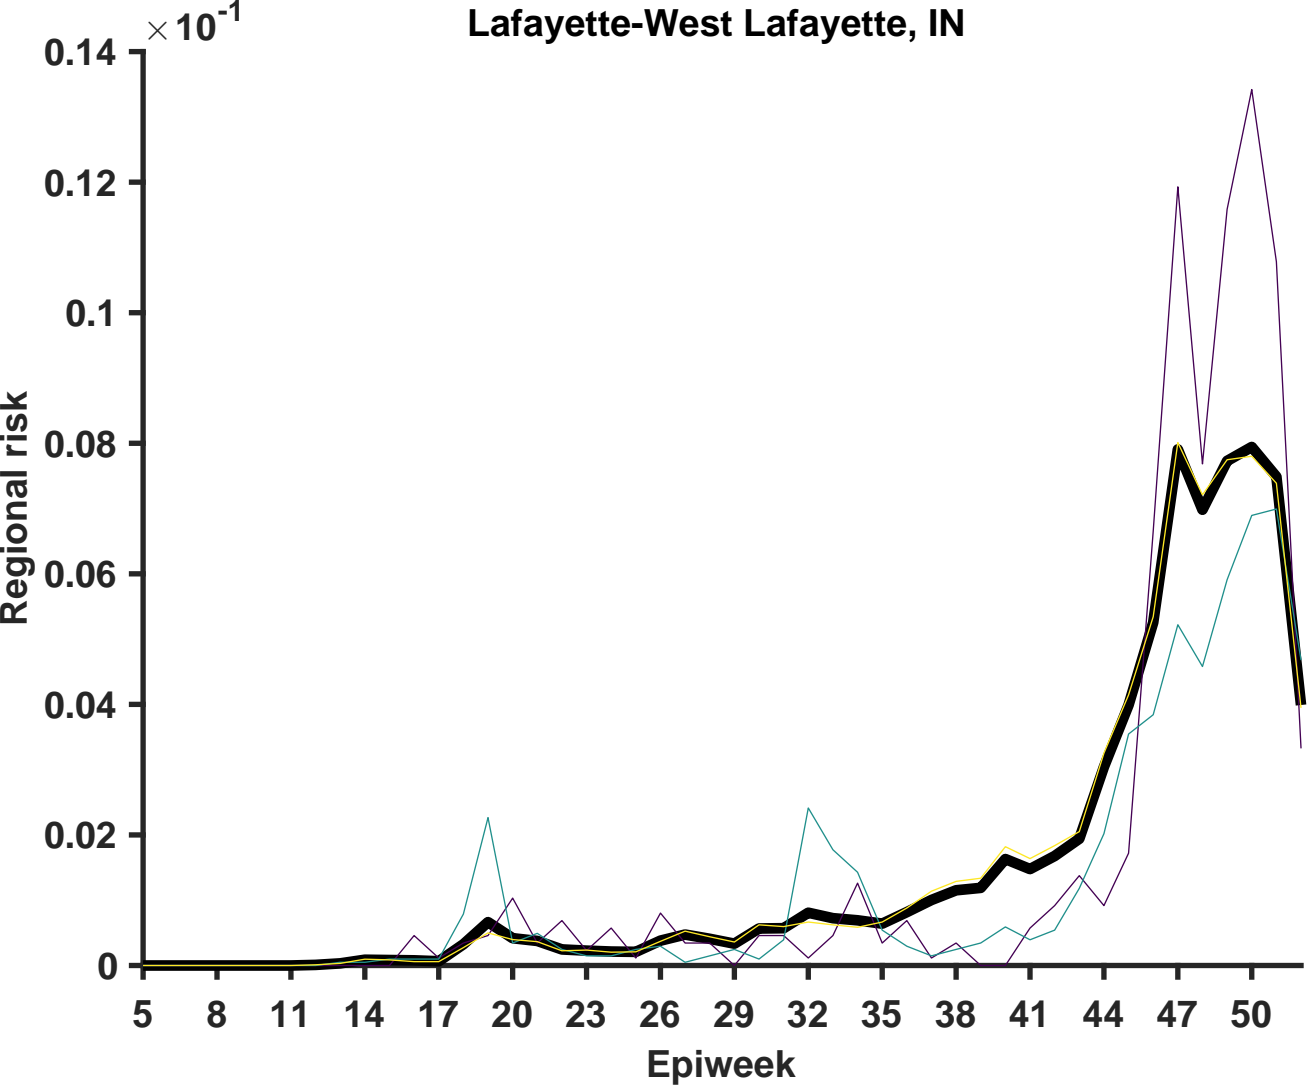

# Champaign-Urbana, IL

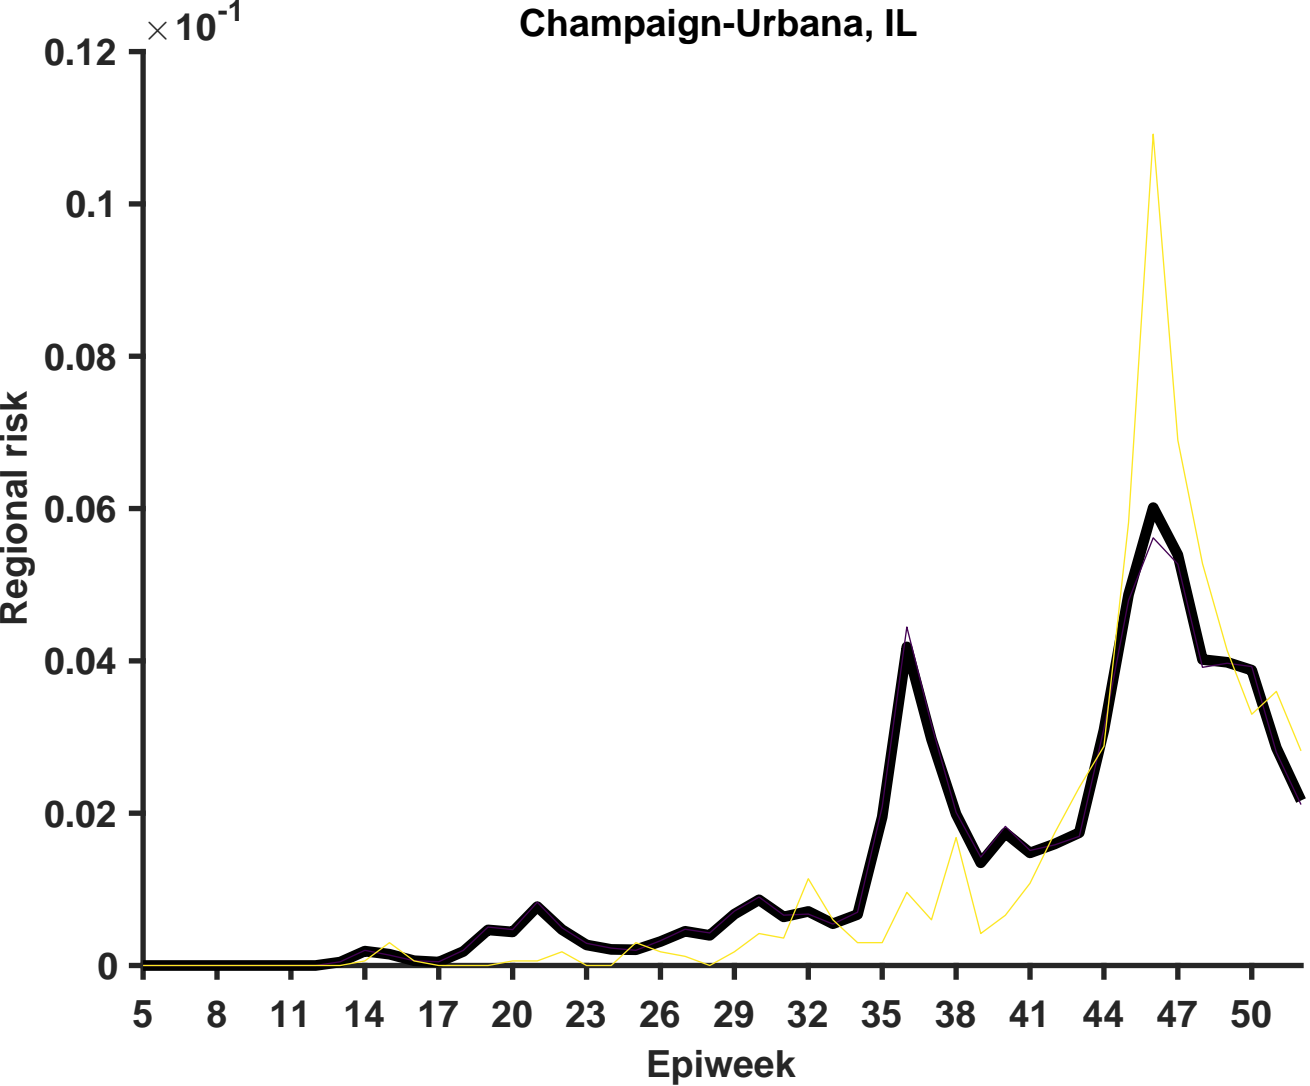

# Lake Charles, LA

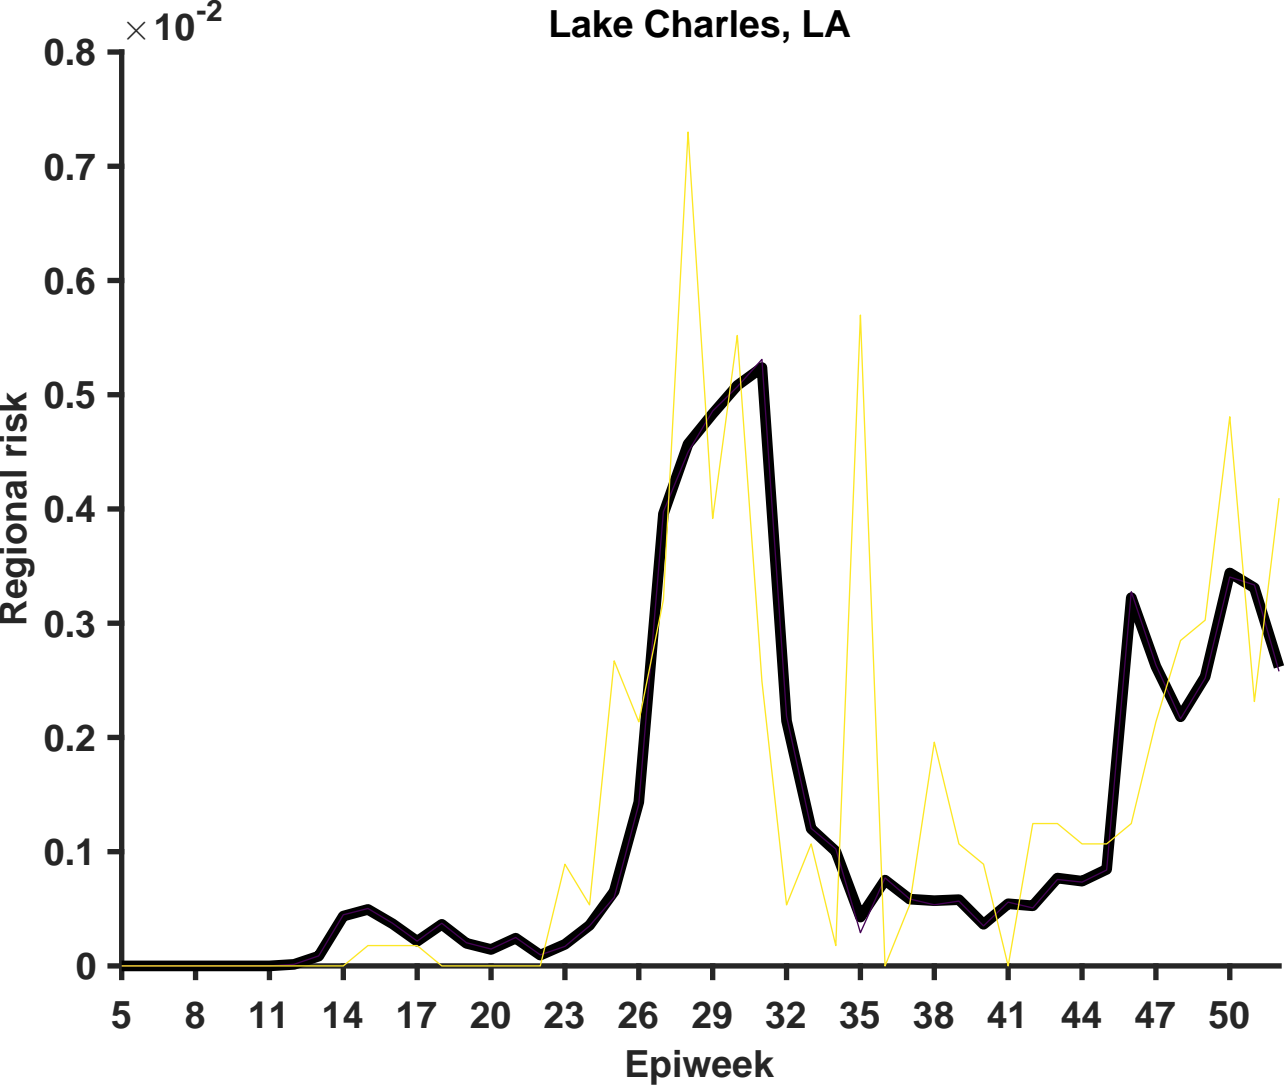



# Charlottesville, VA

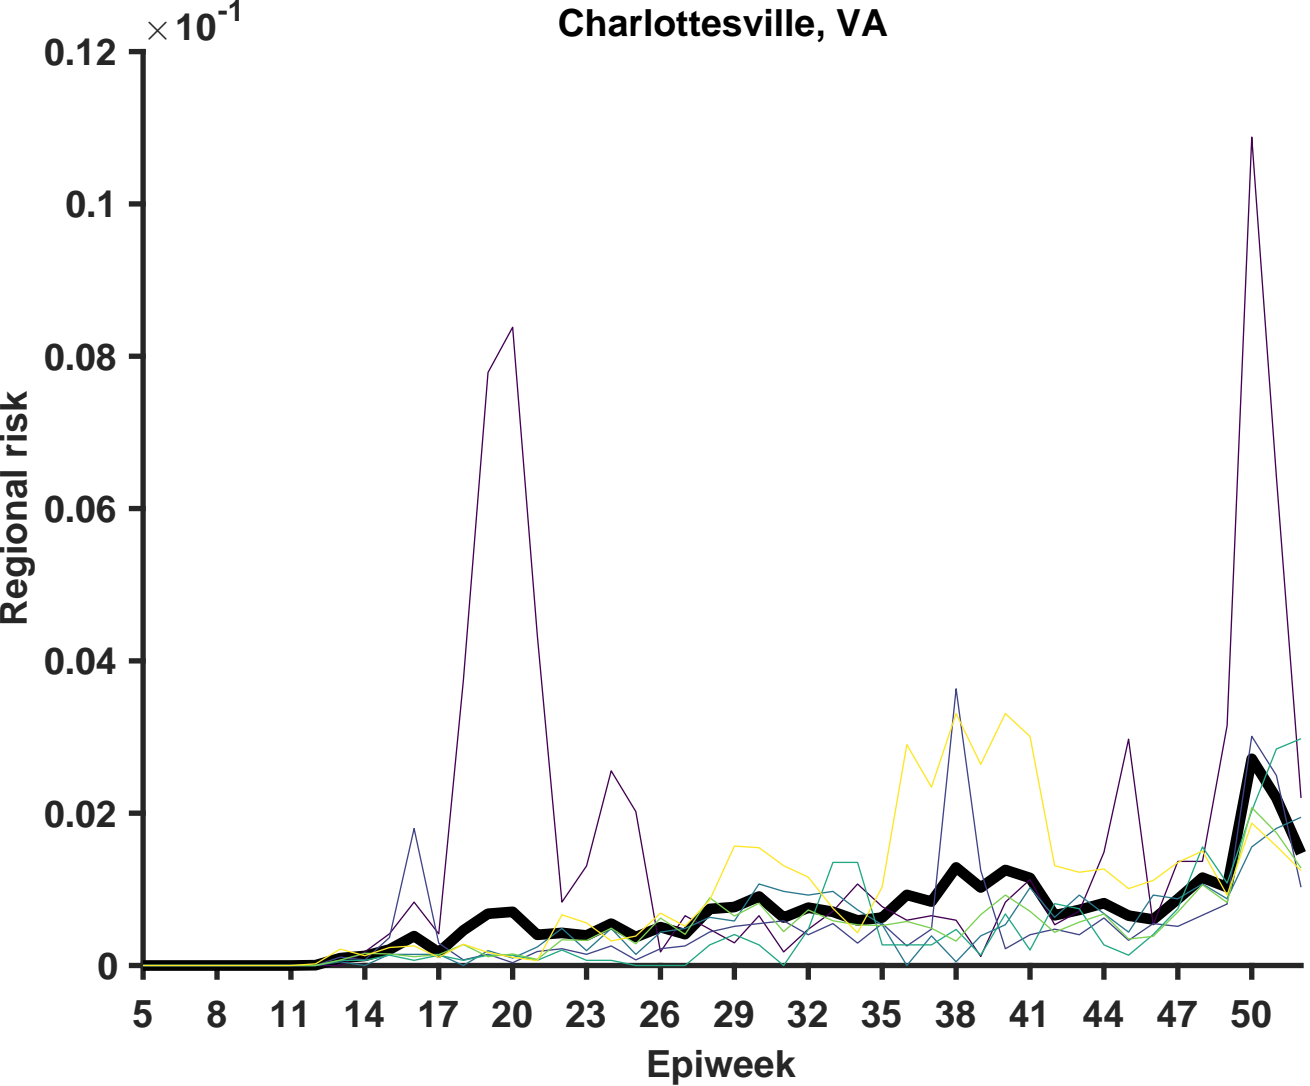

# Hilton Head Island-Bluffton-Beaufort, SC

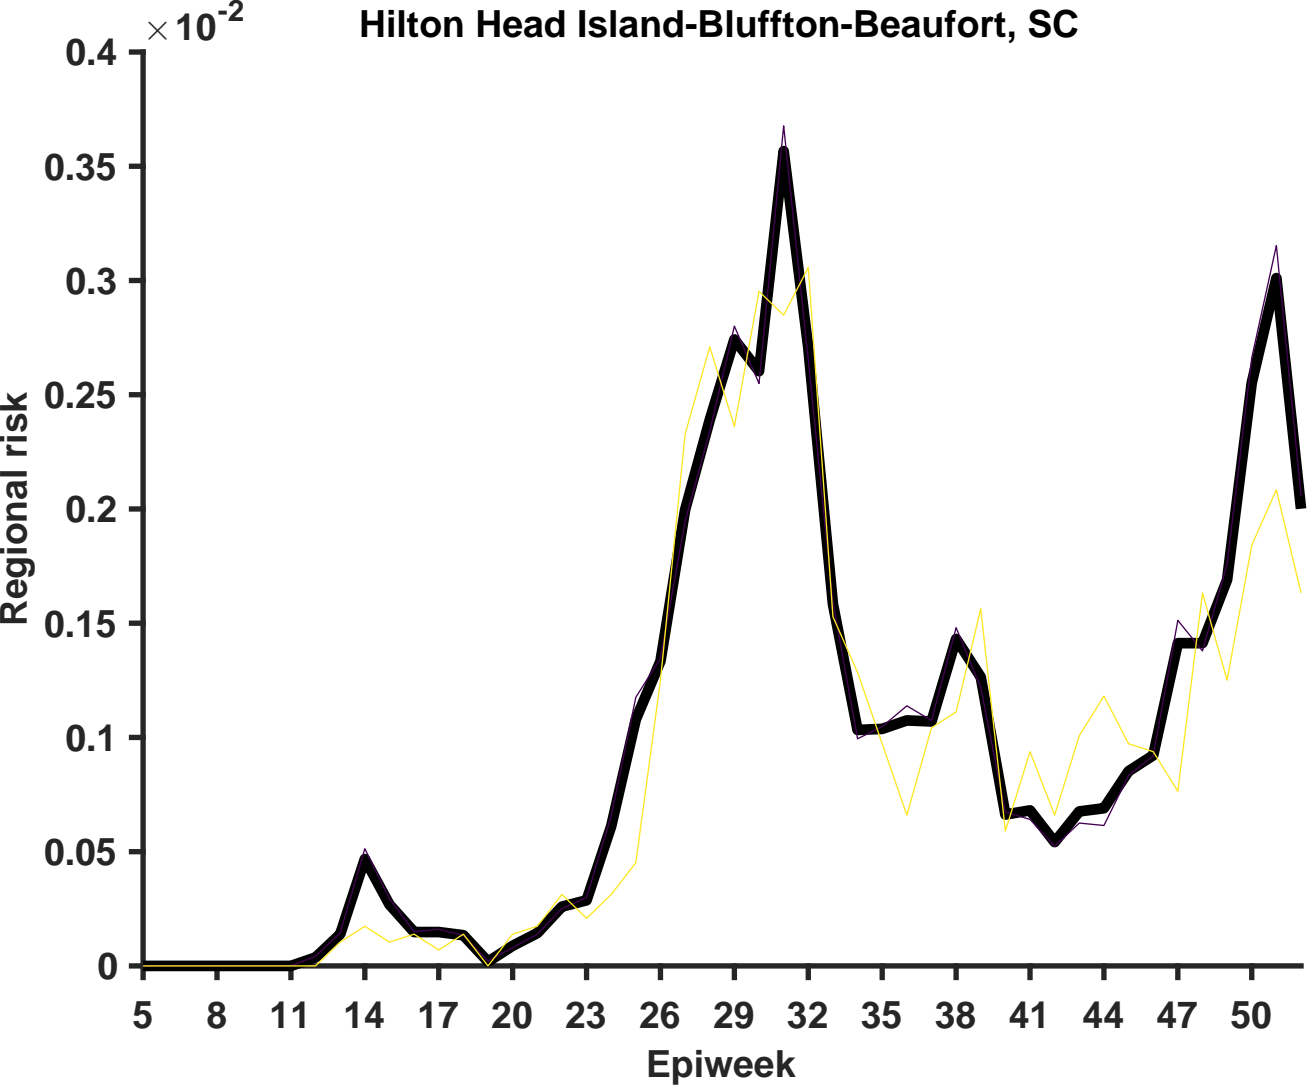

# Athens-Clarke County, GA

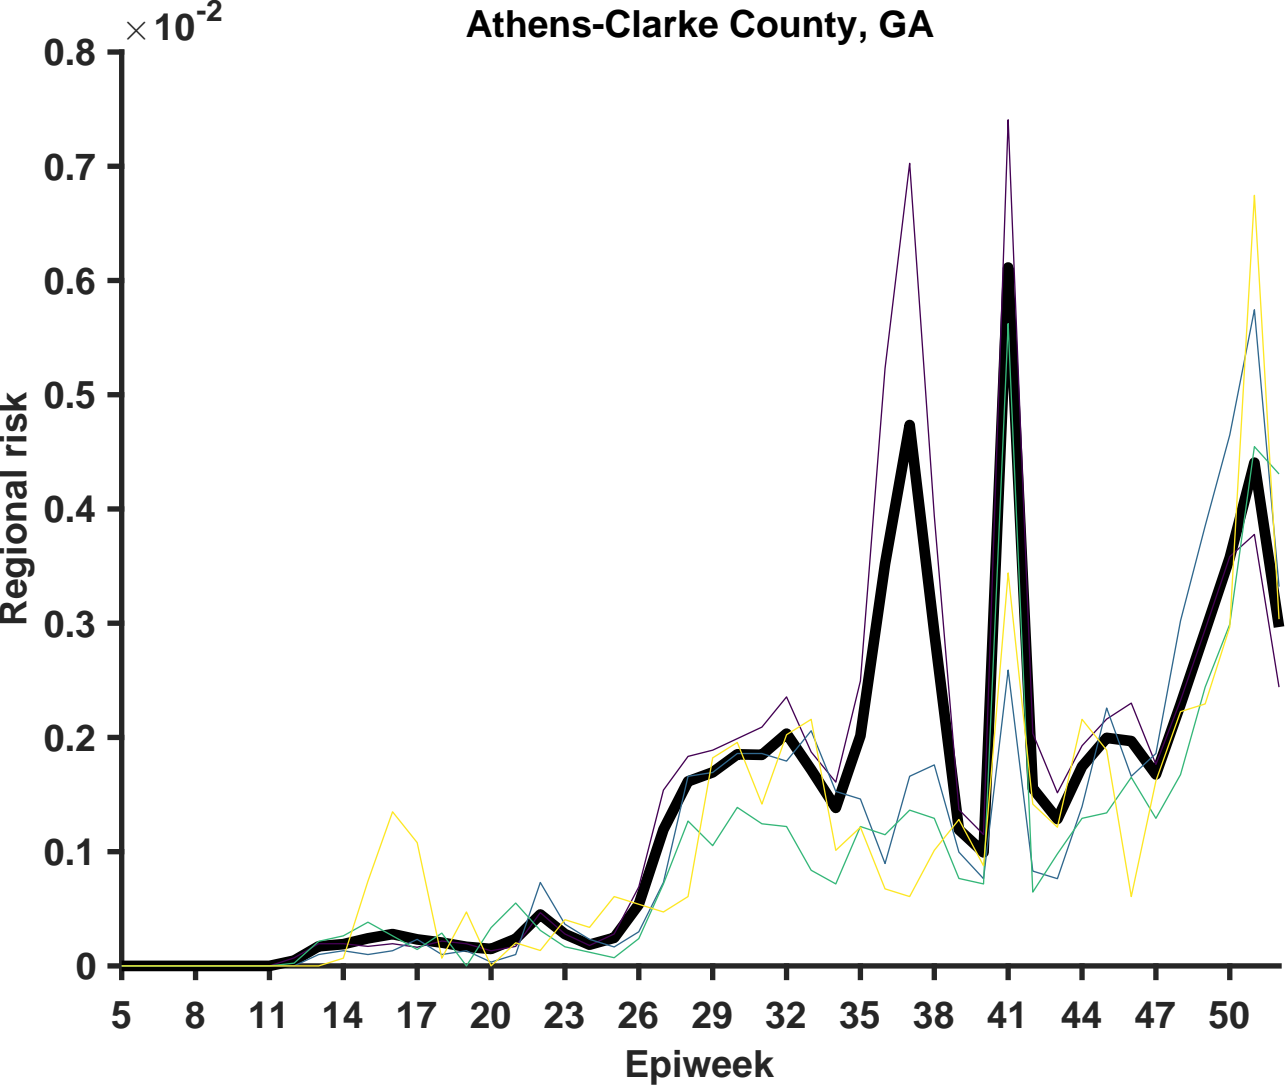

# Columbia, MO

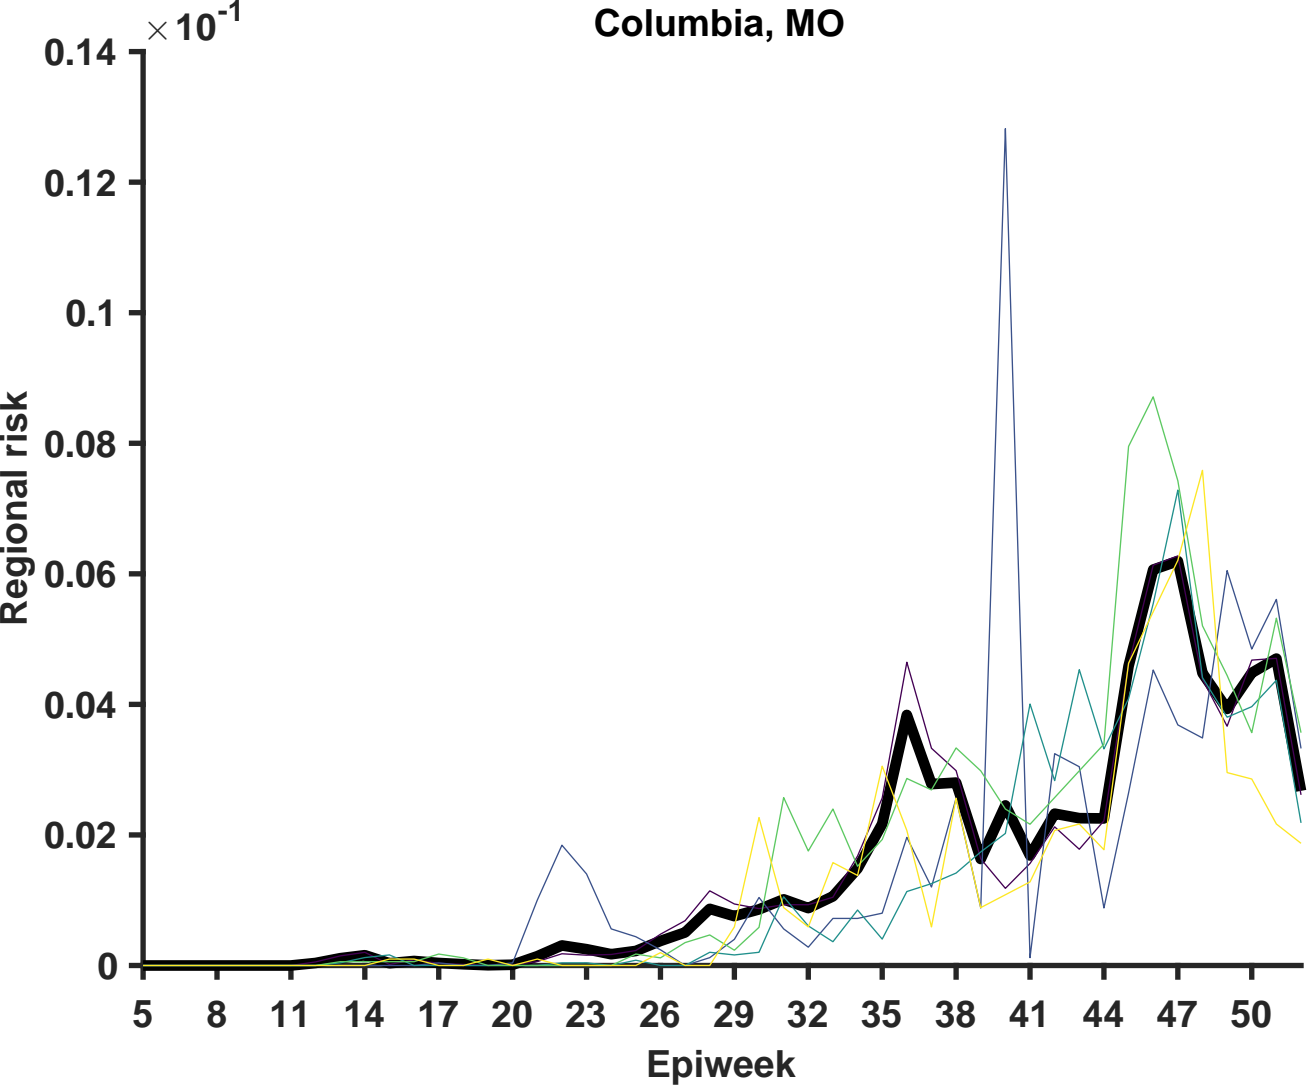

# Springfield, IL

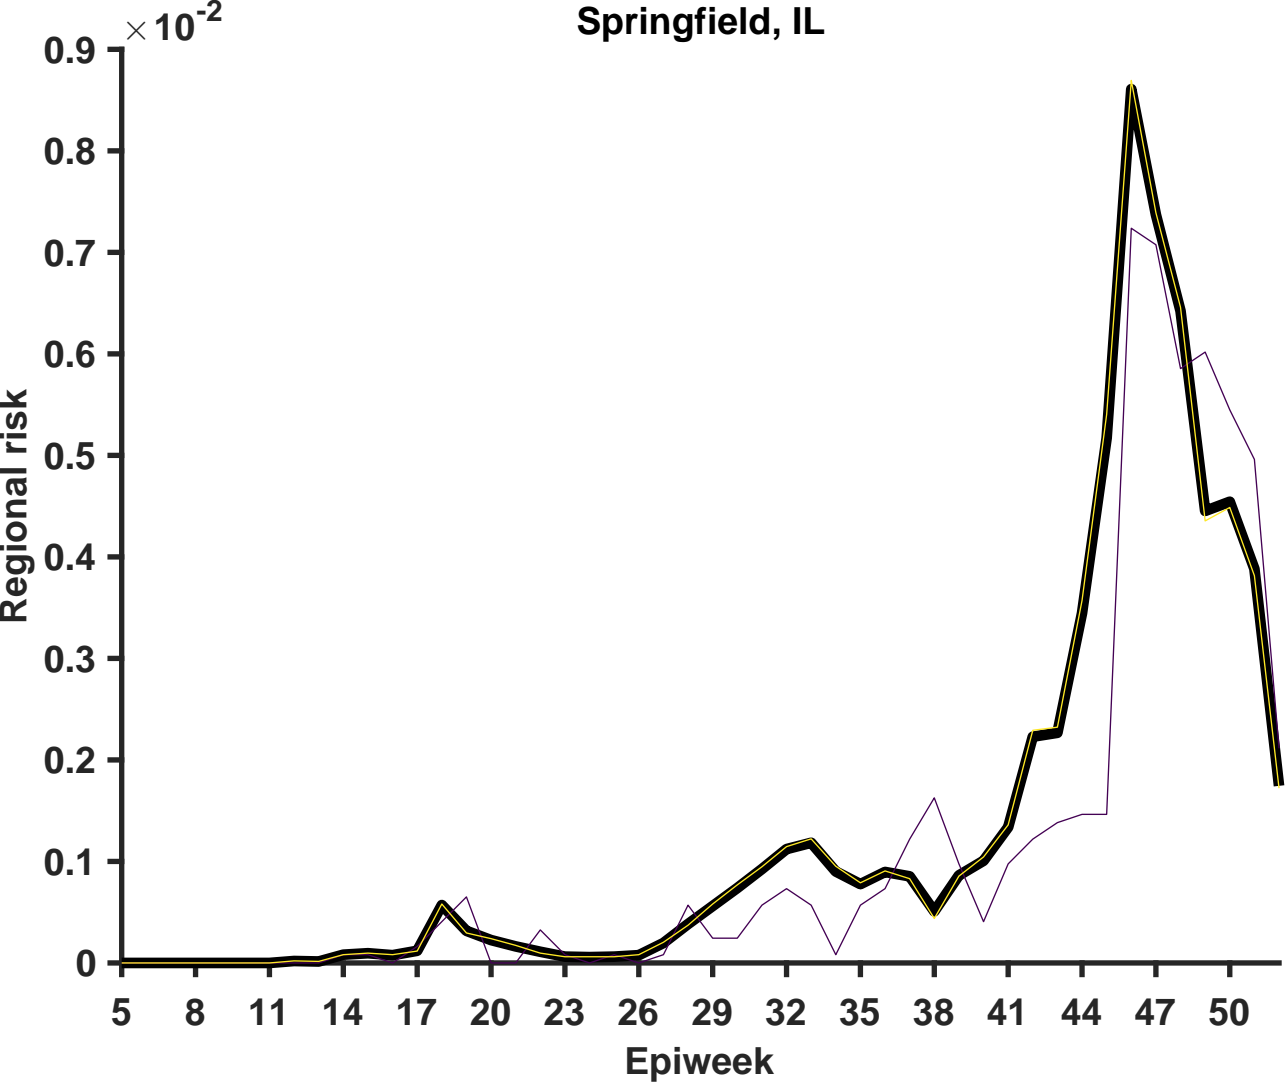

# Johnson City, TN

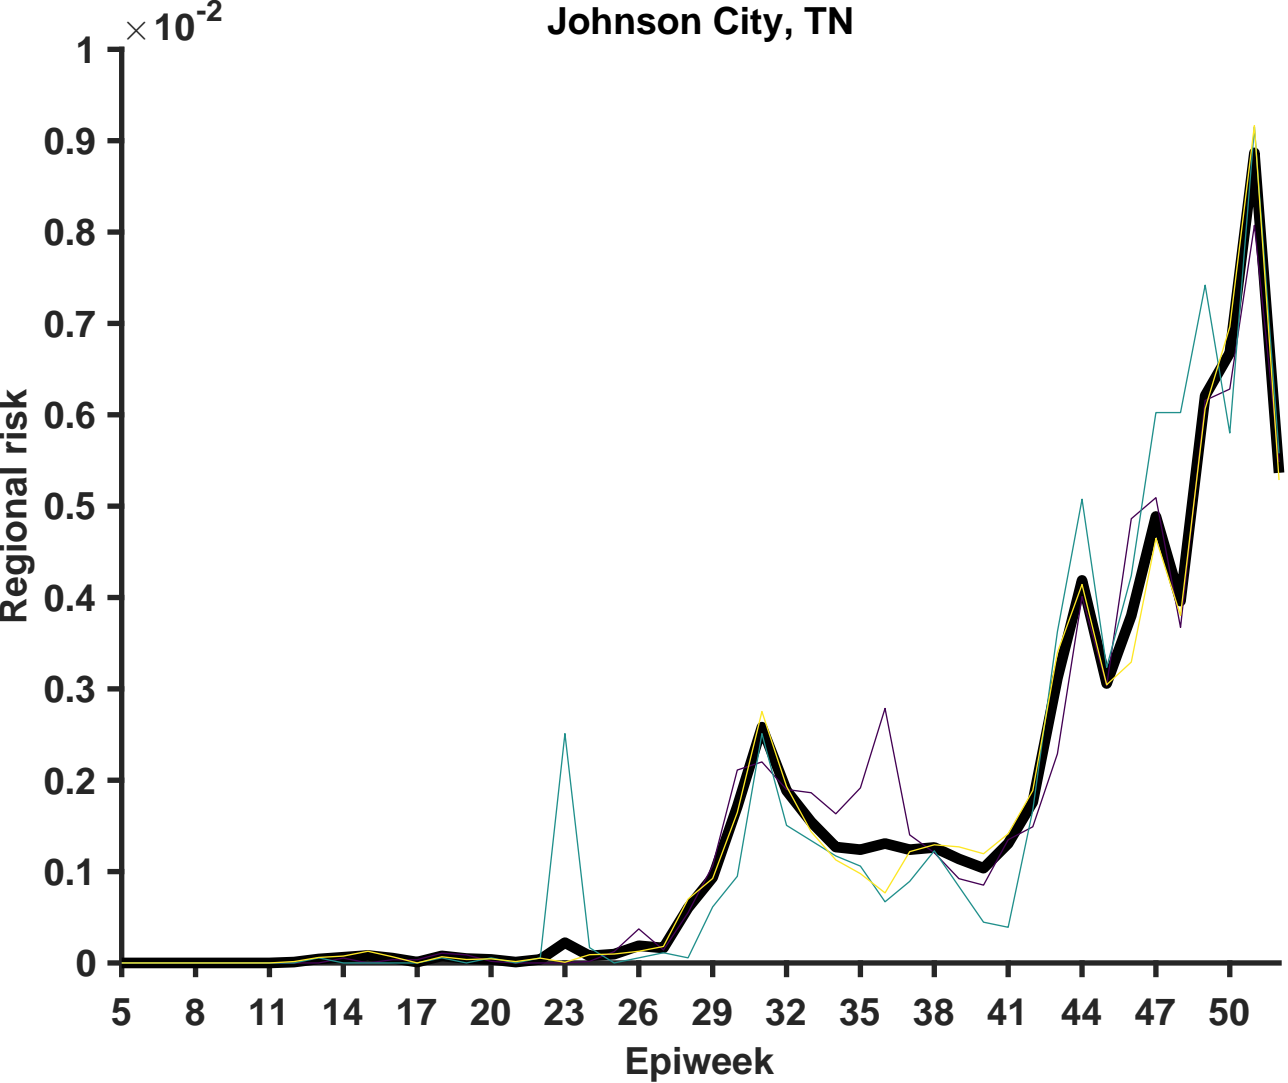

# Houma-Thibodaux, LA

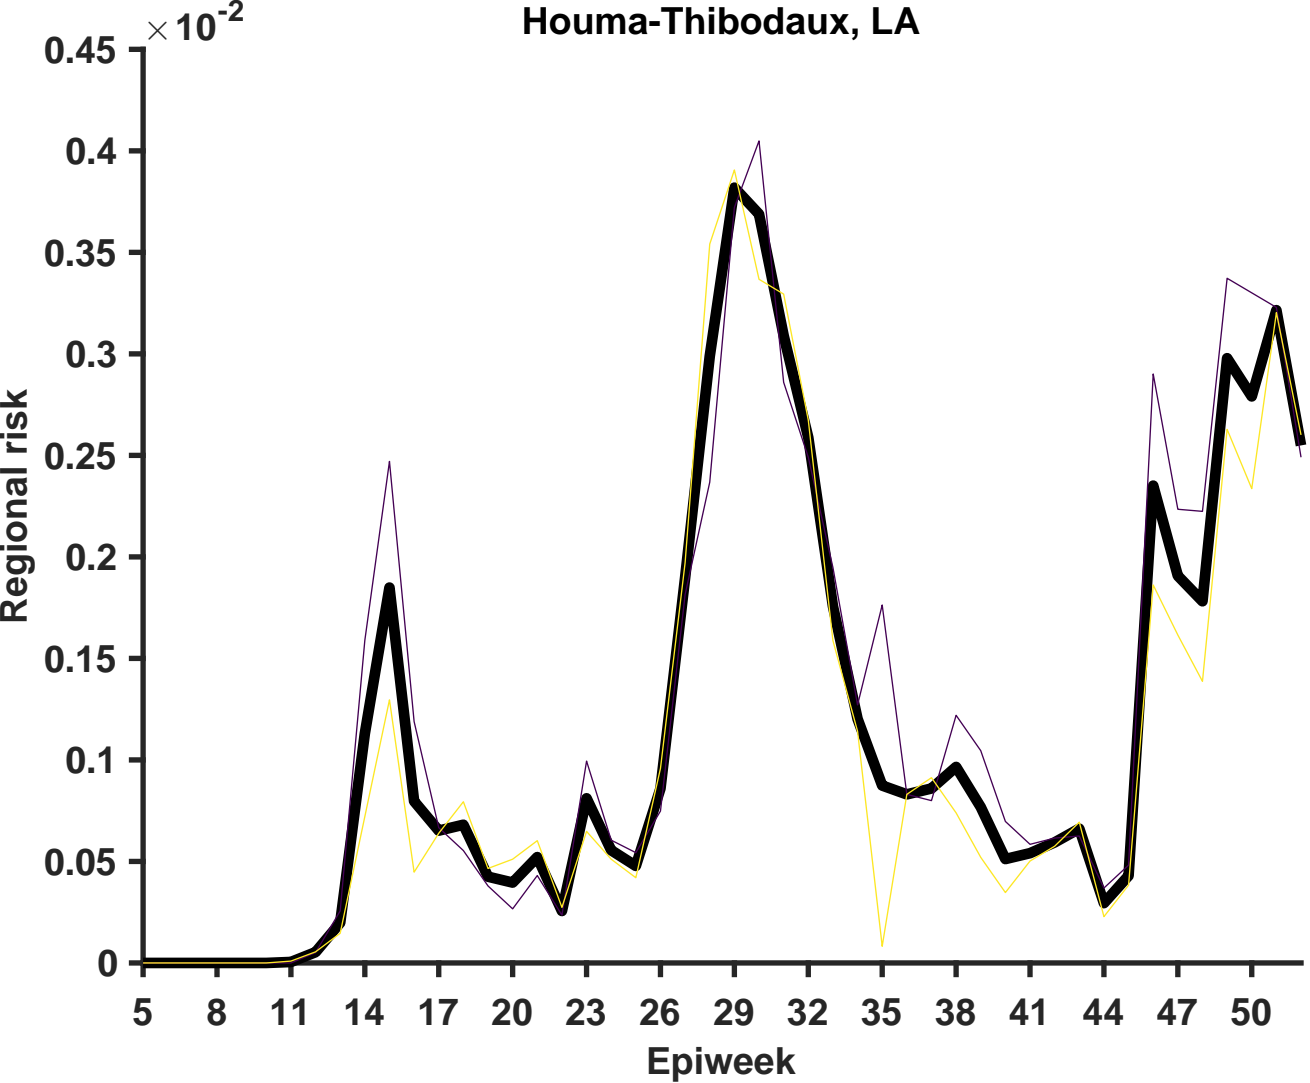

# Monroe, LA

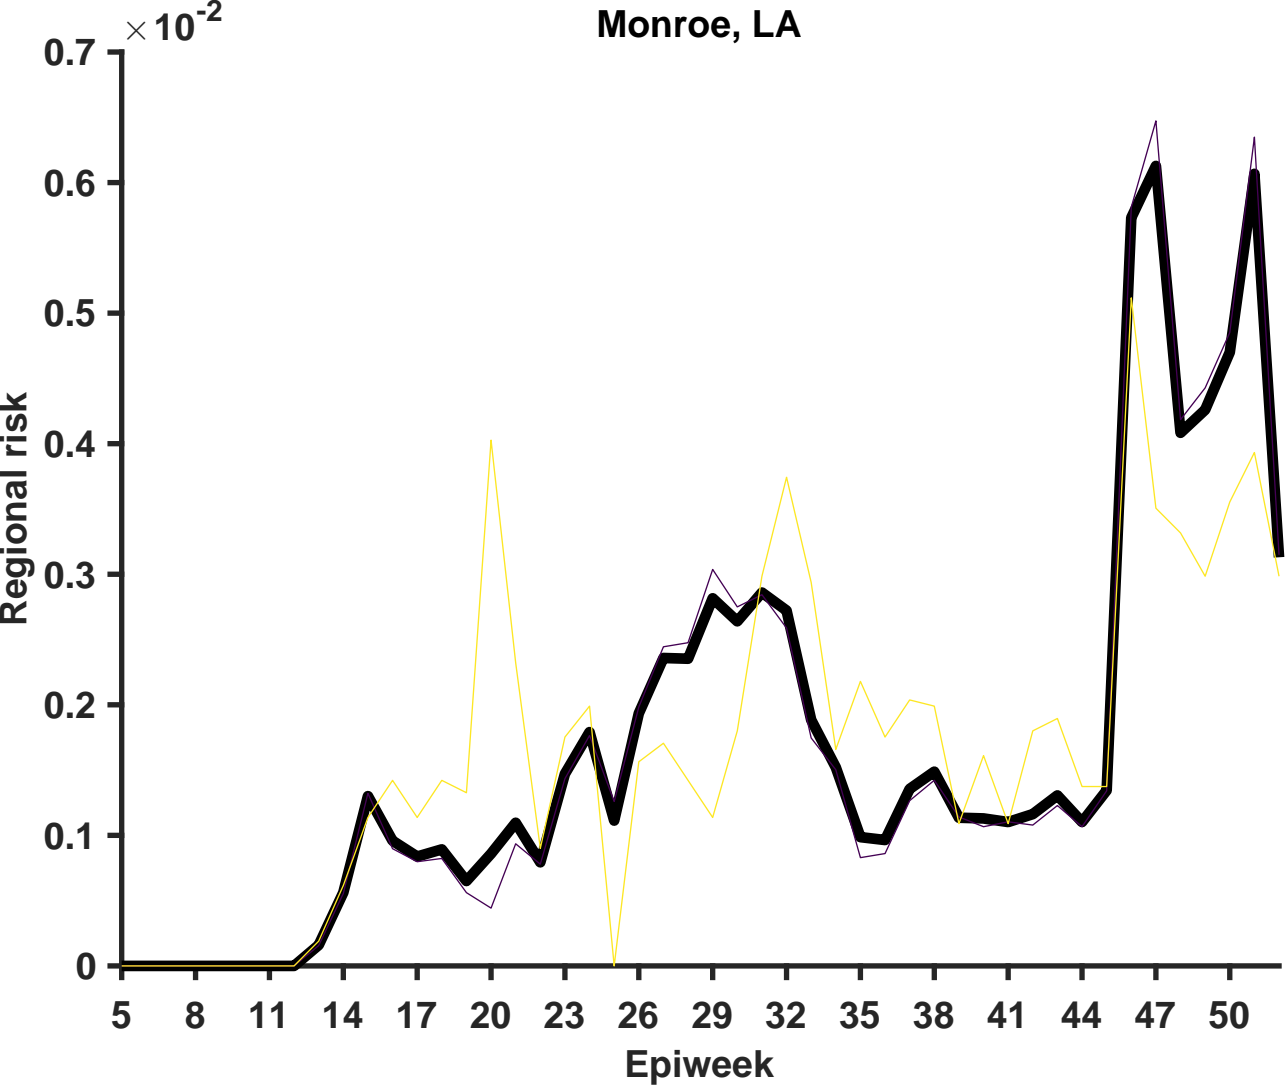



# Florence, SC

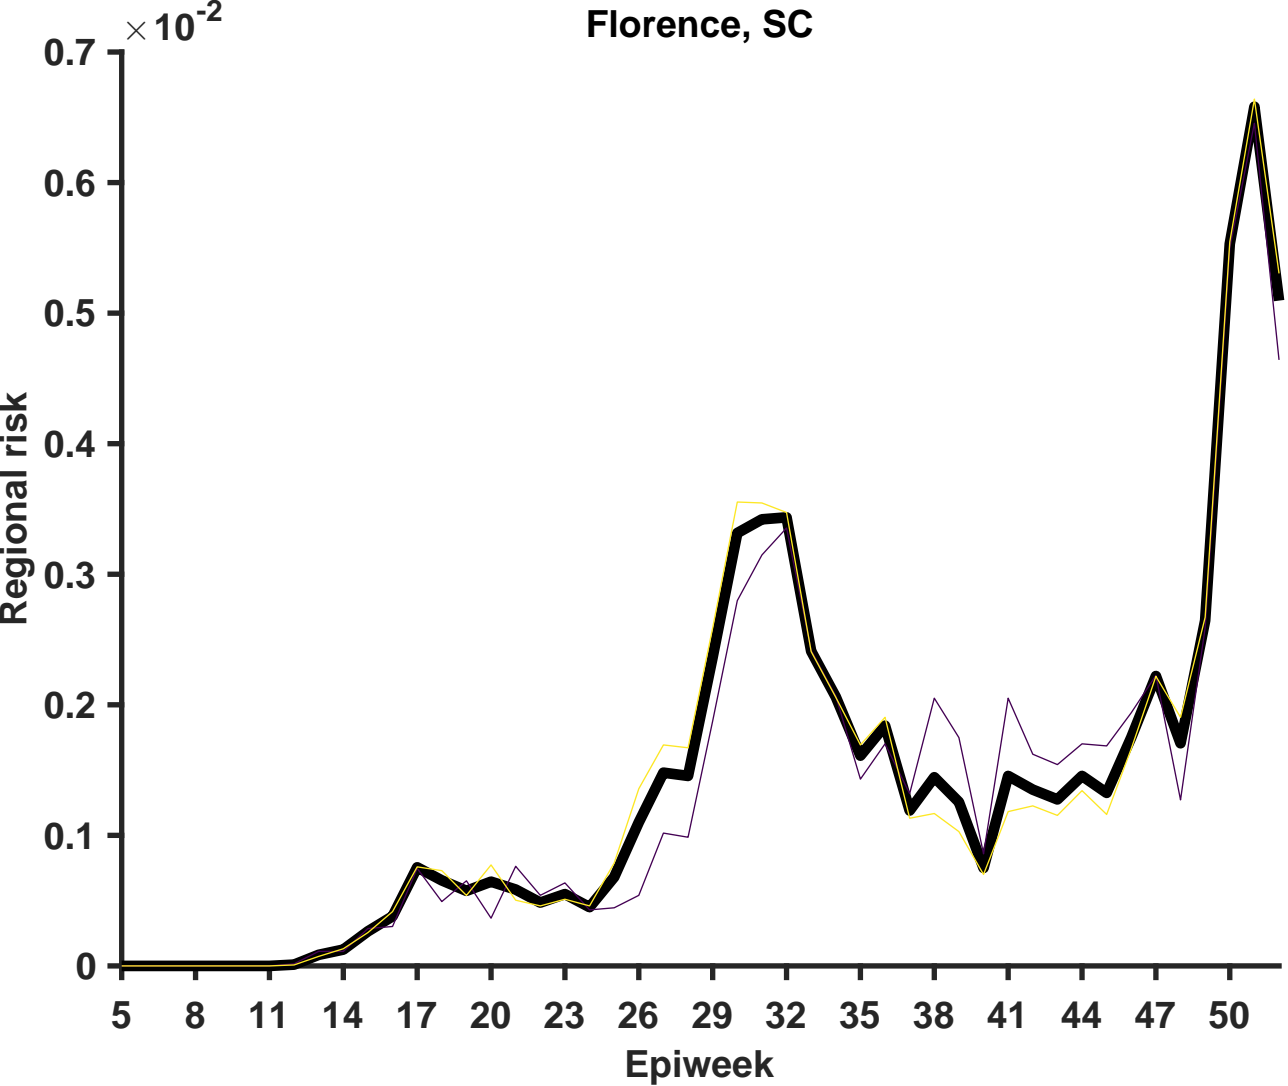

# St. Cloud, MN

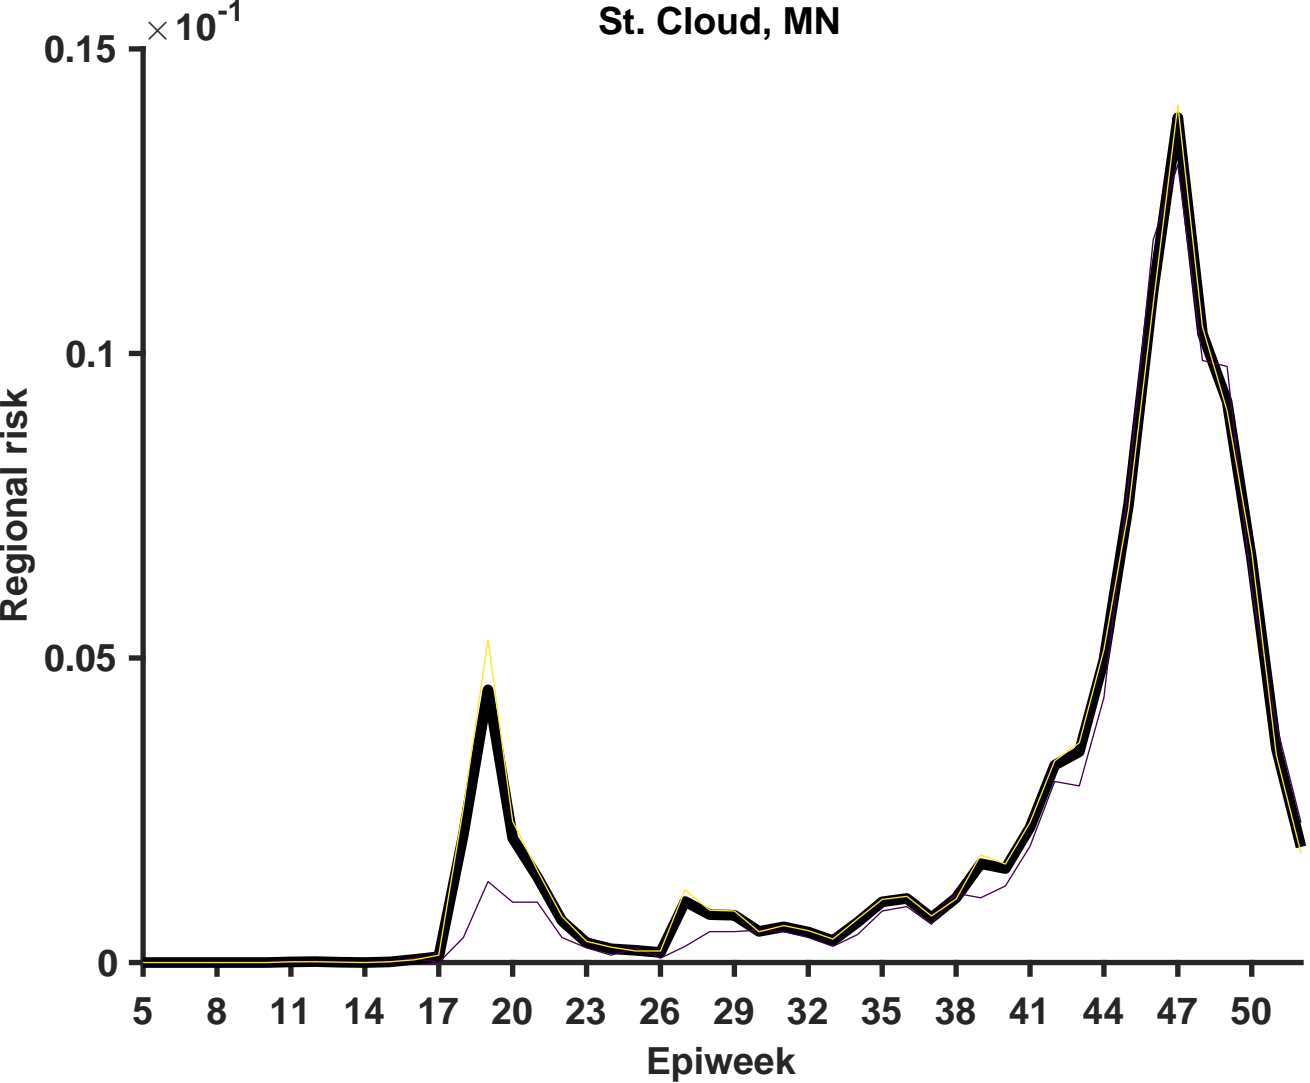

# Warner Robins, GA

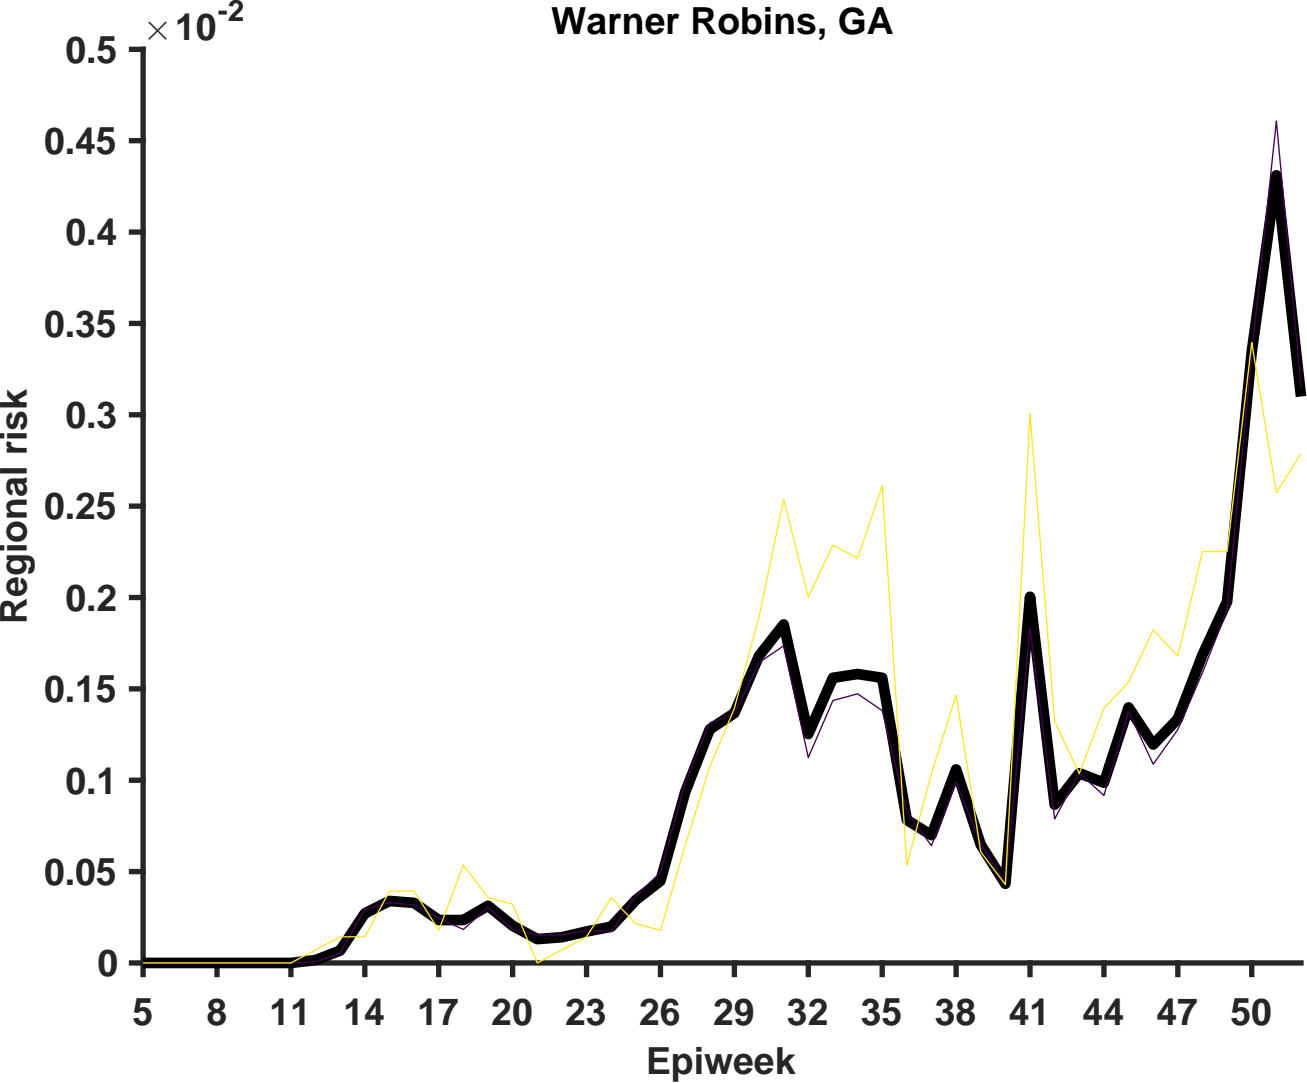

# Terre Haute, IN

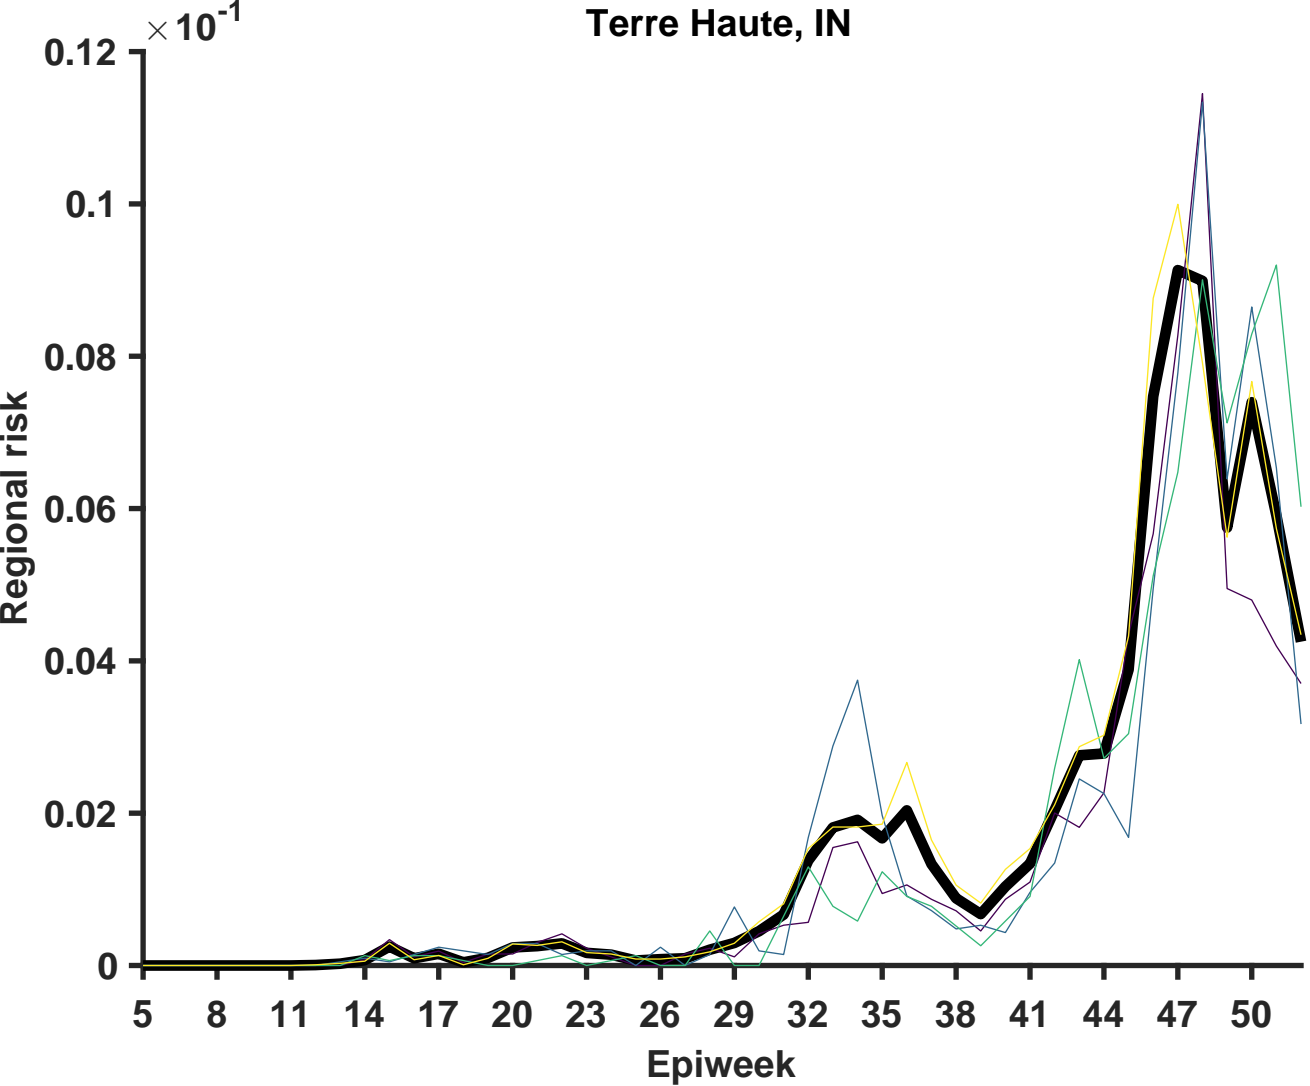

# Billings, MT

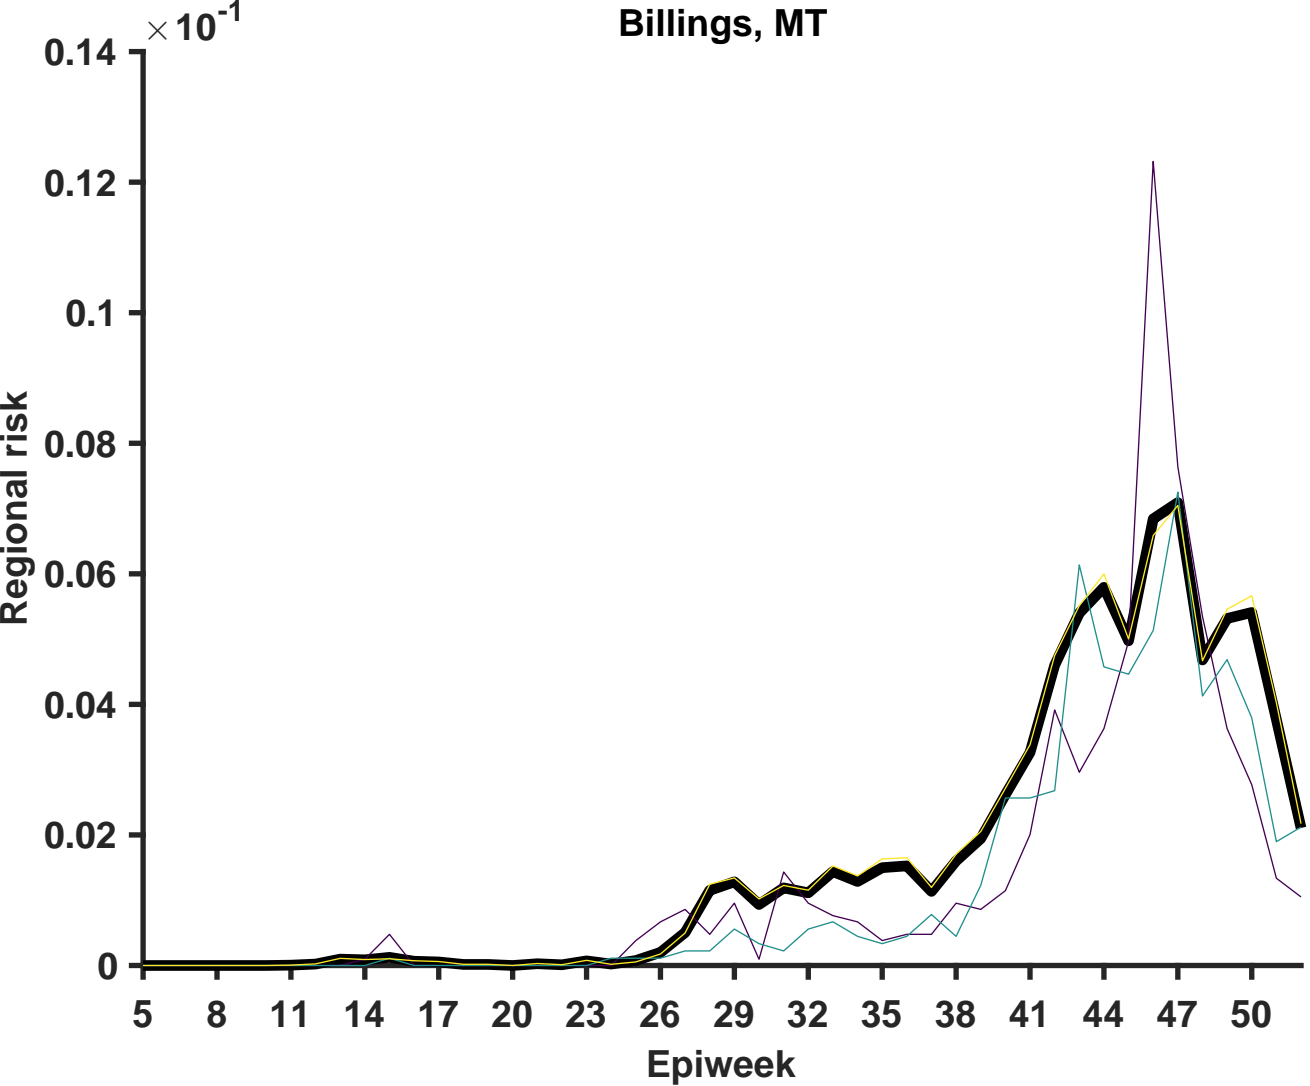

# Joplin, MO

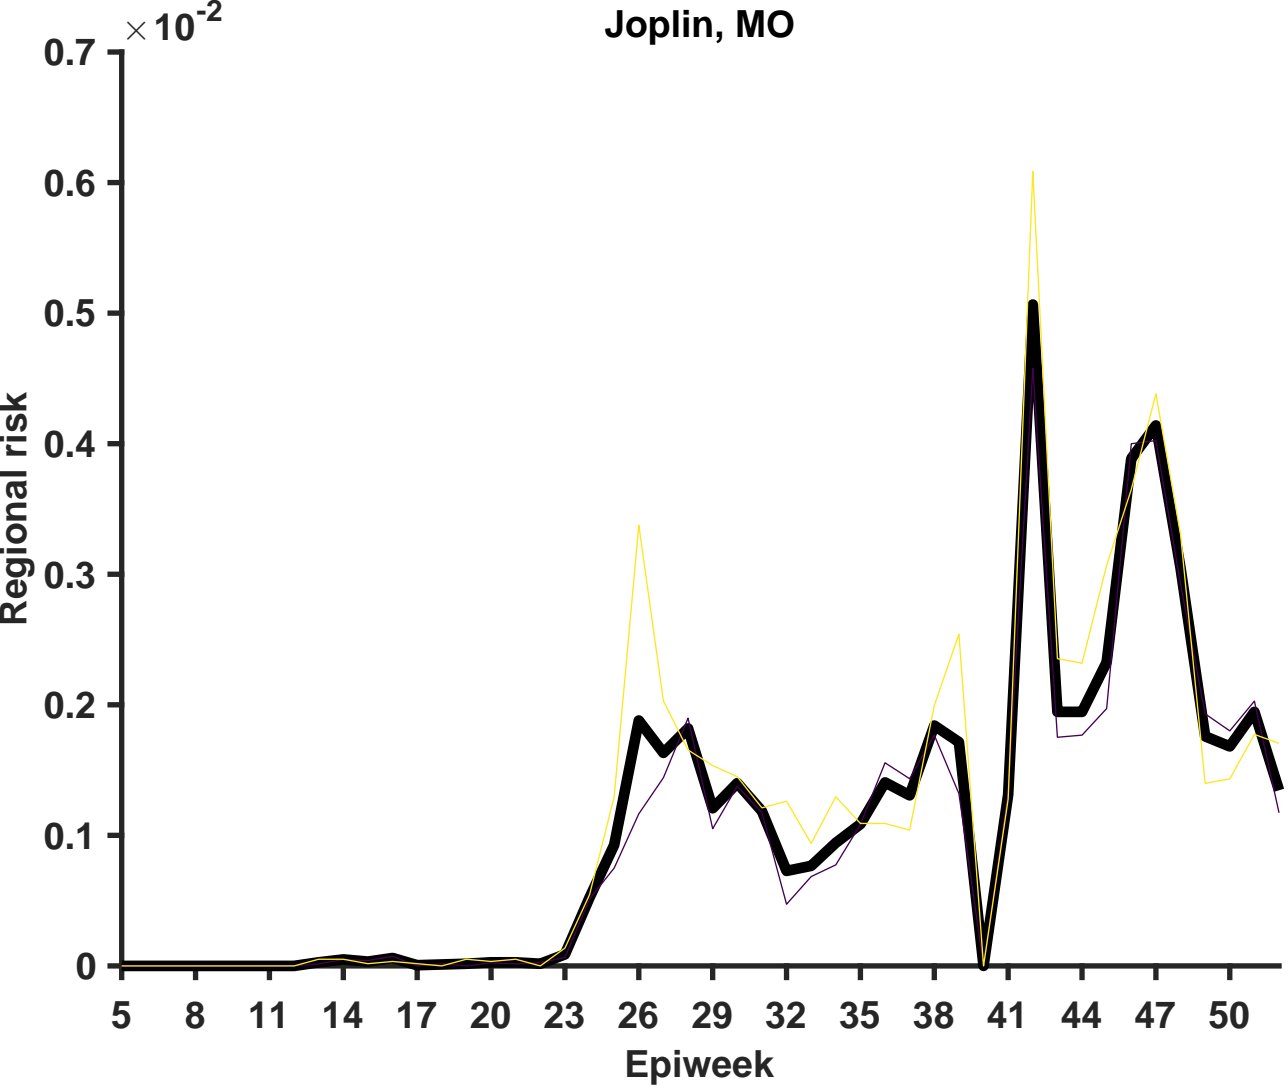

# Yuba City, CA

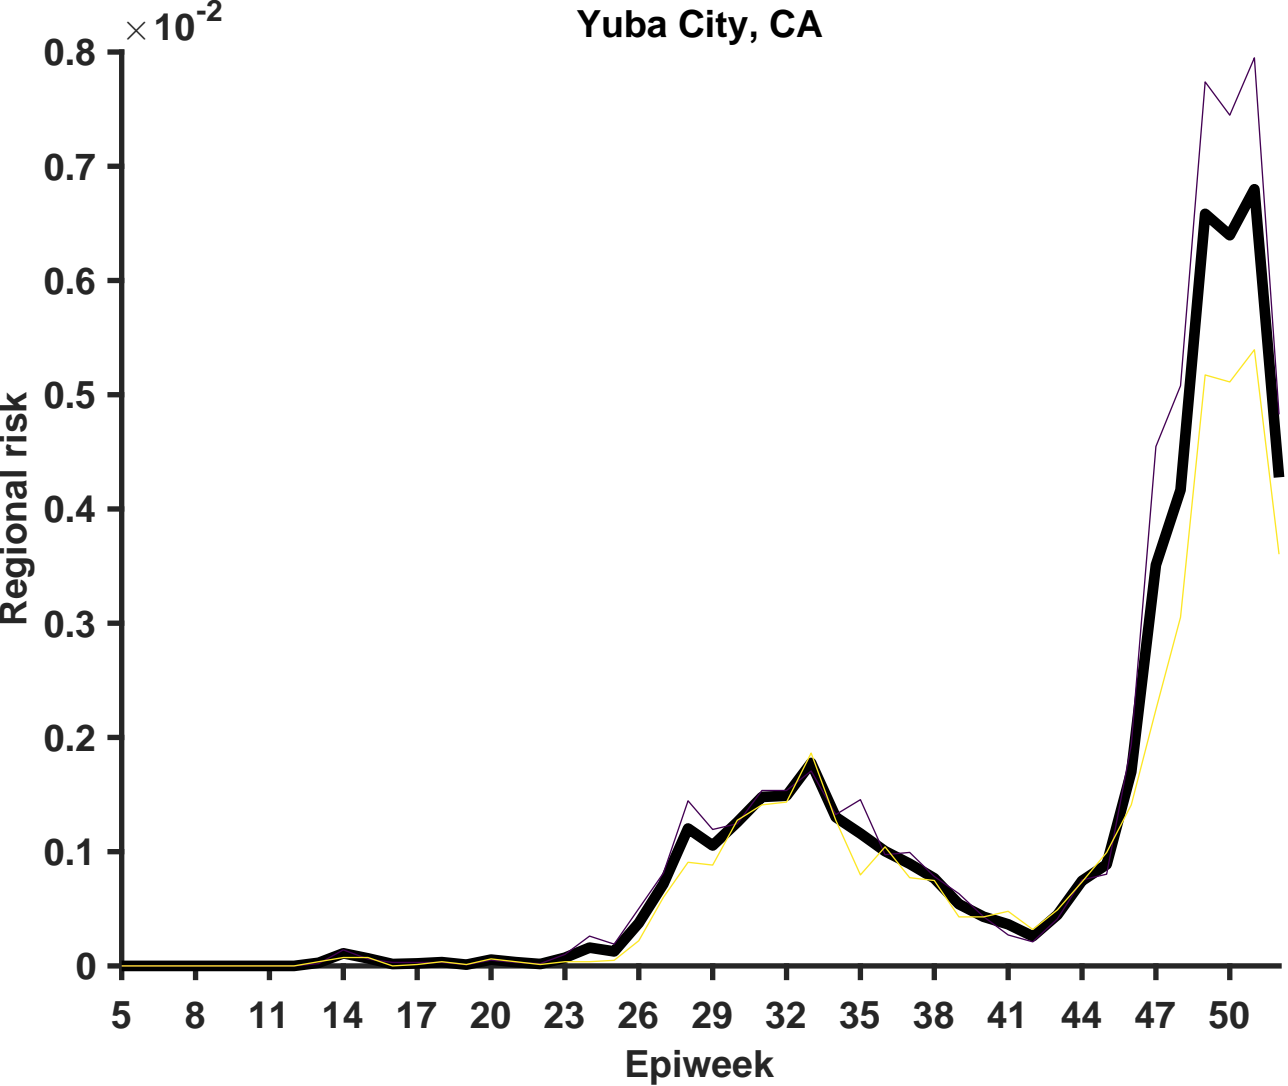

# Jackson, TN

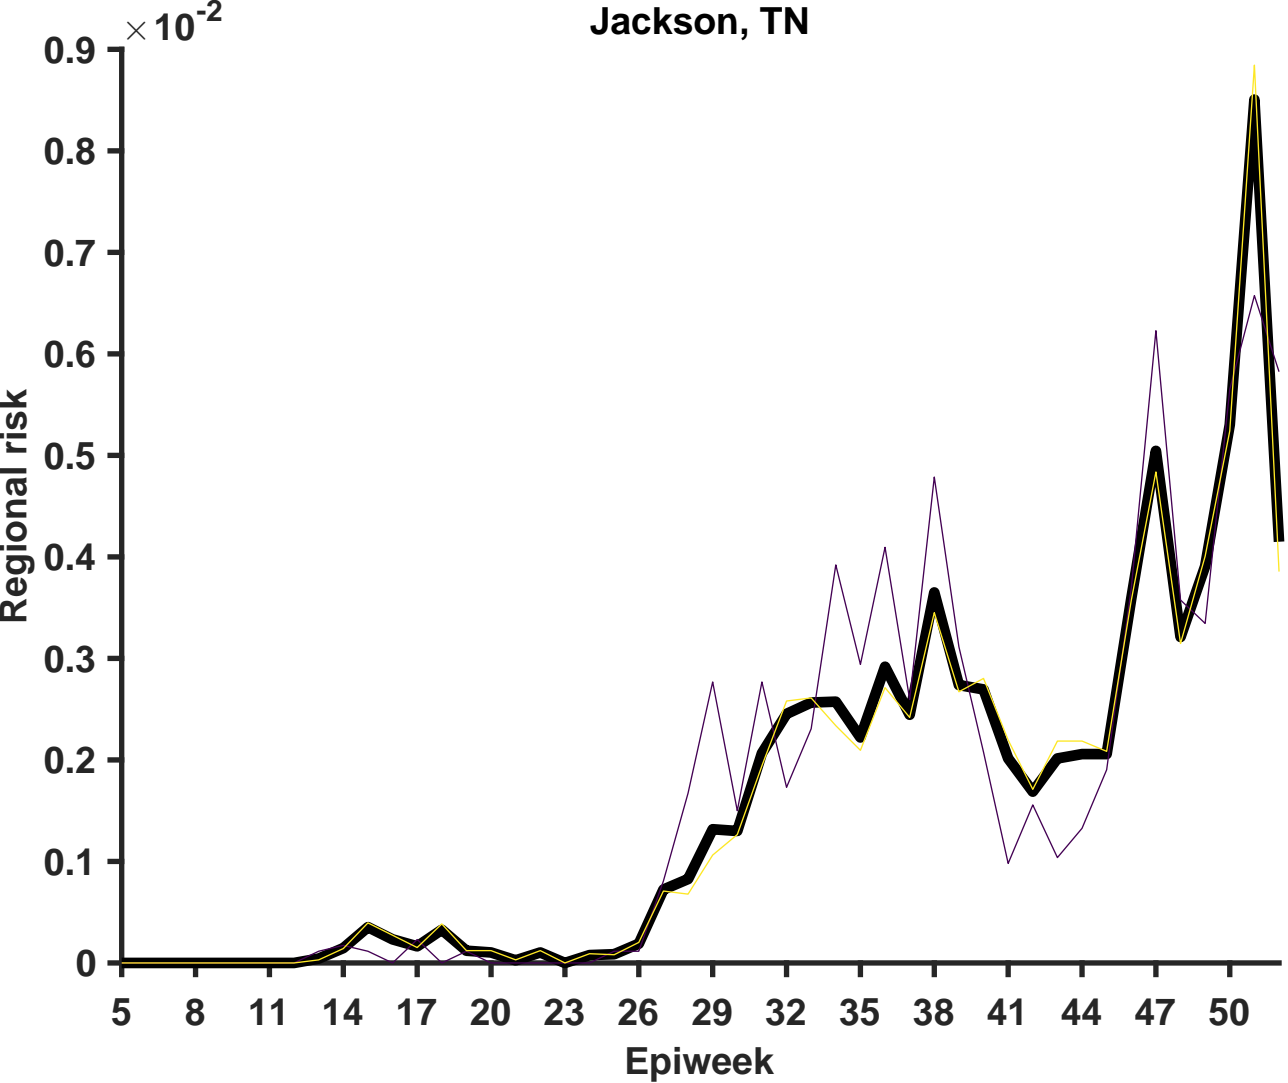



# Bowling Green, KY

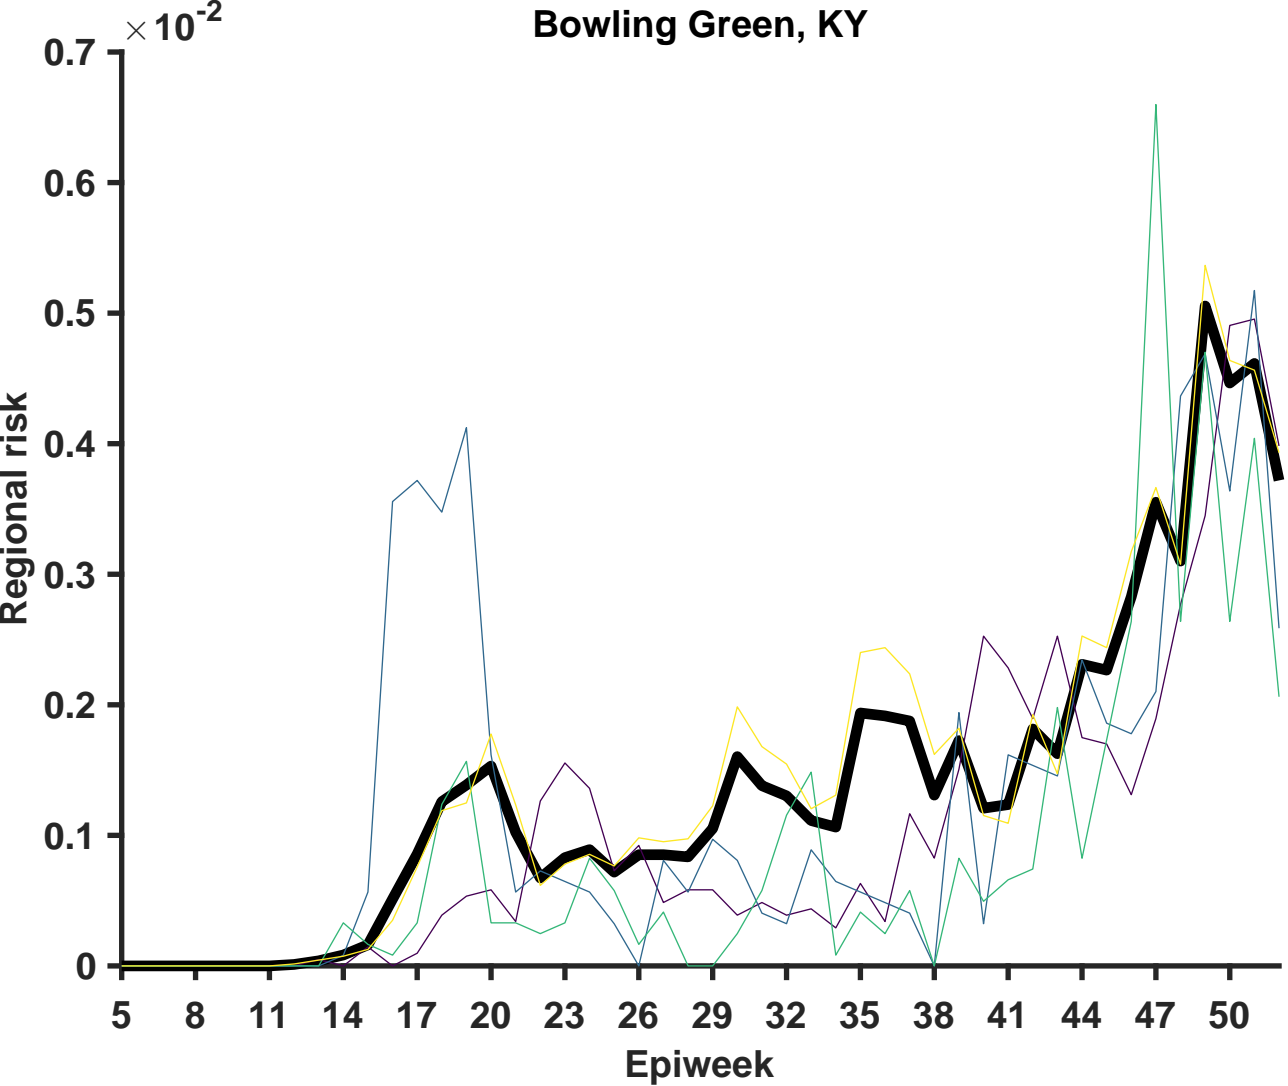

# Abilene, TX

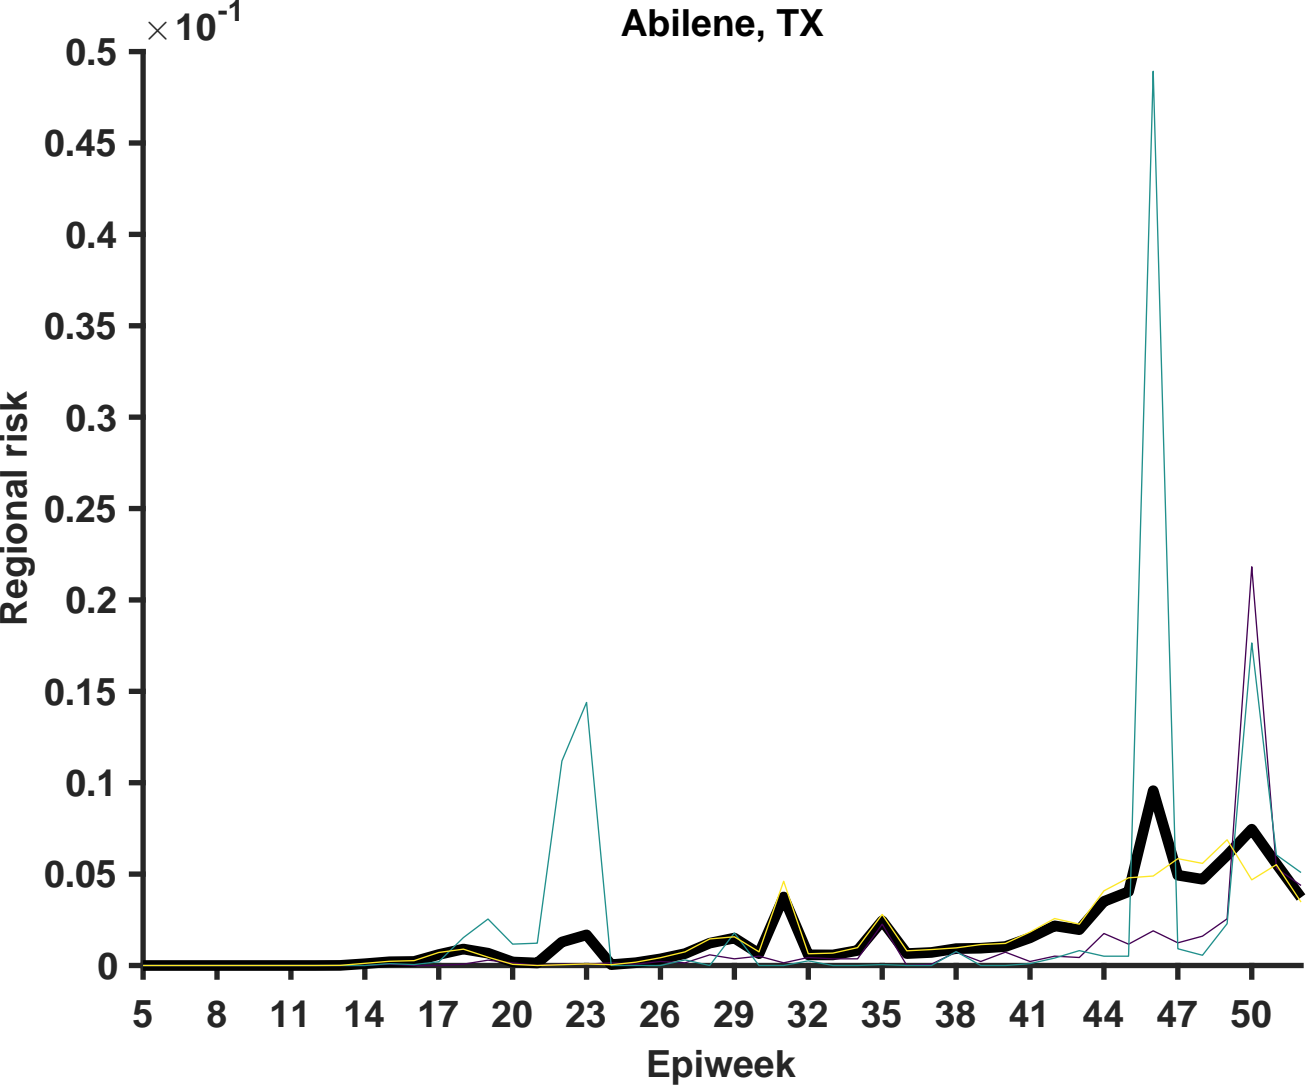

# Iowa City, IA

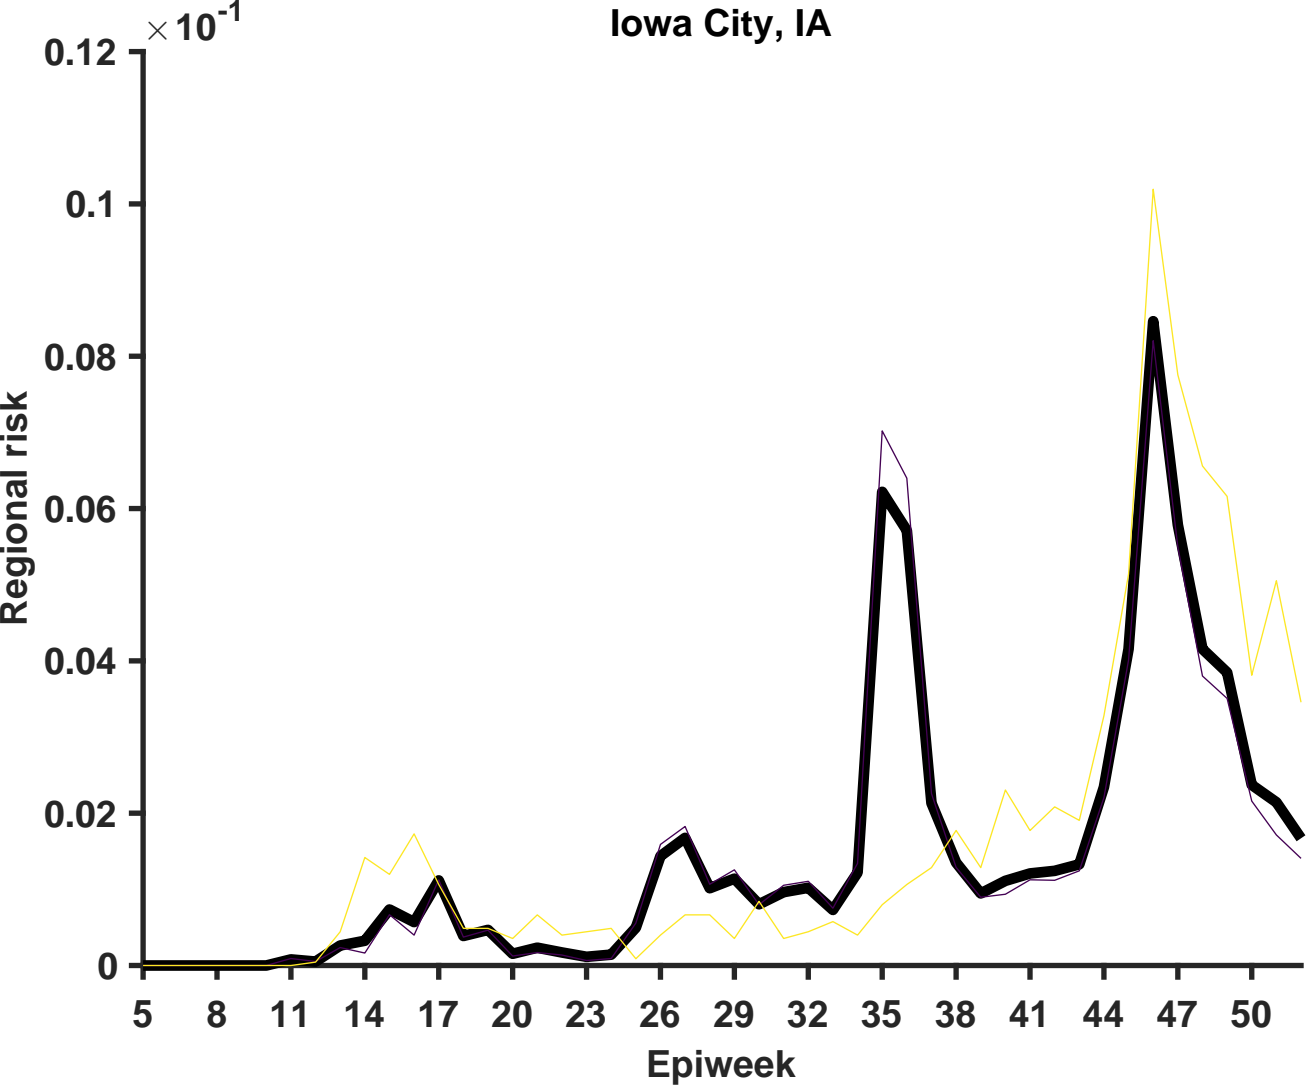

# Hattiesburg, MS

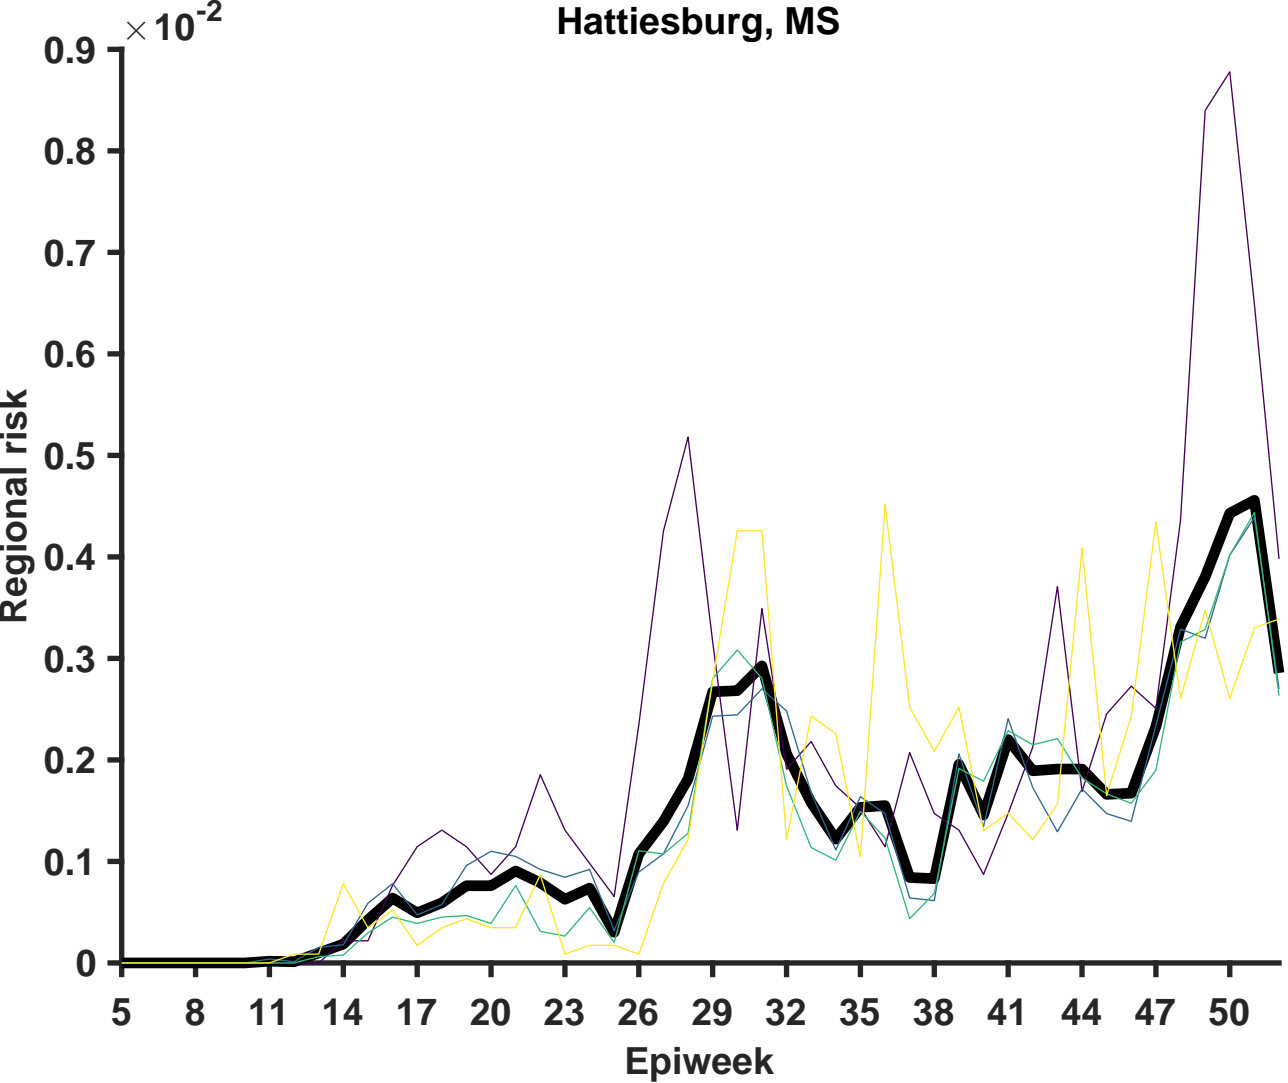

# Eau Claire, WI

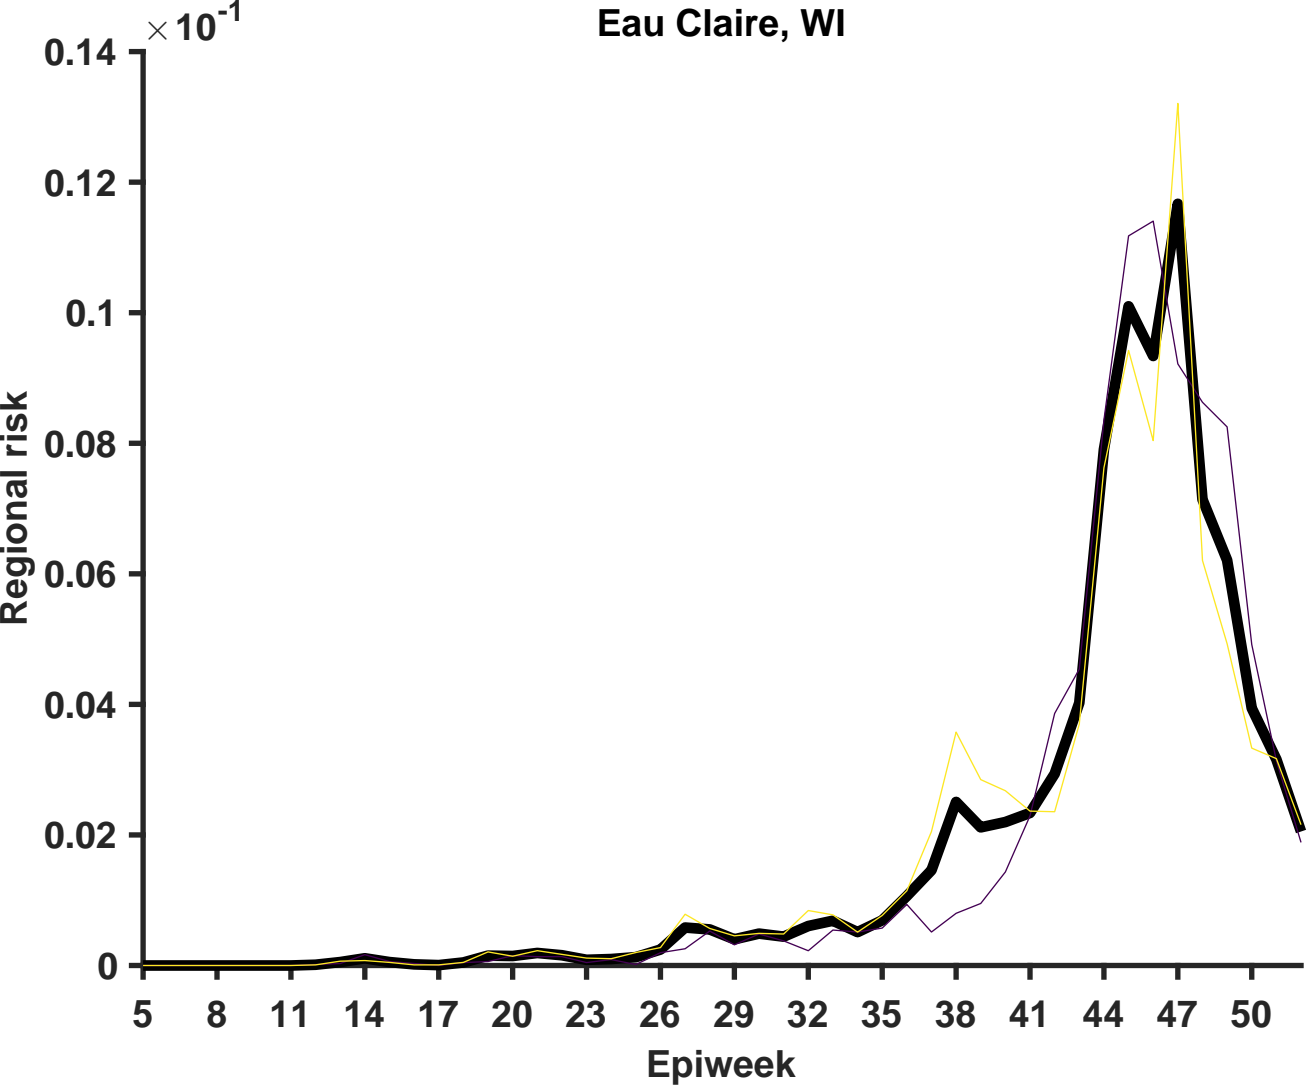

# Bloomington, IL

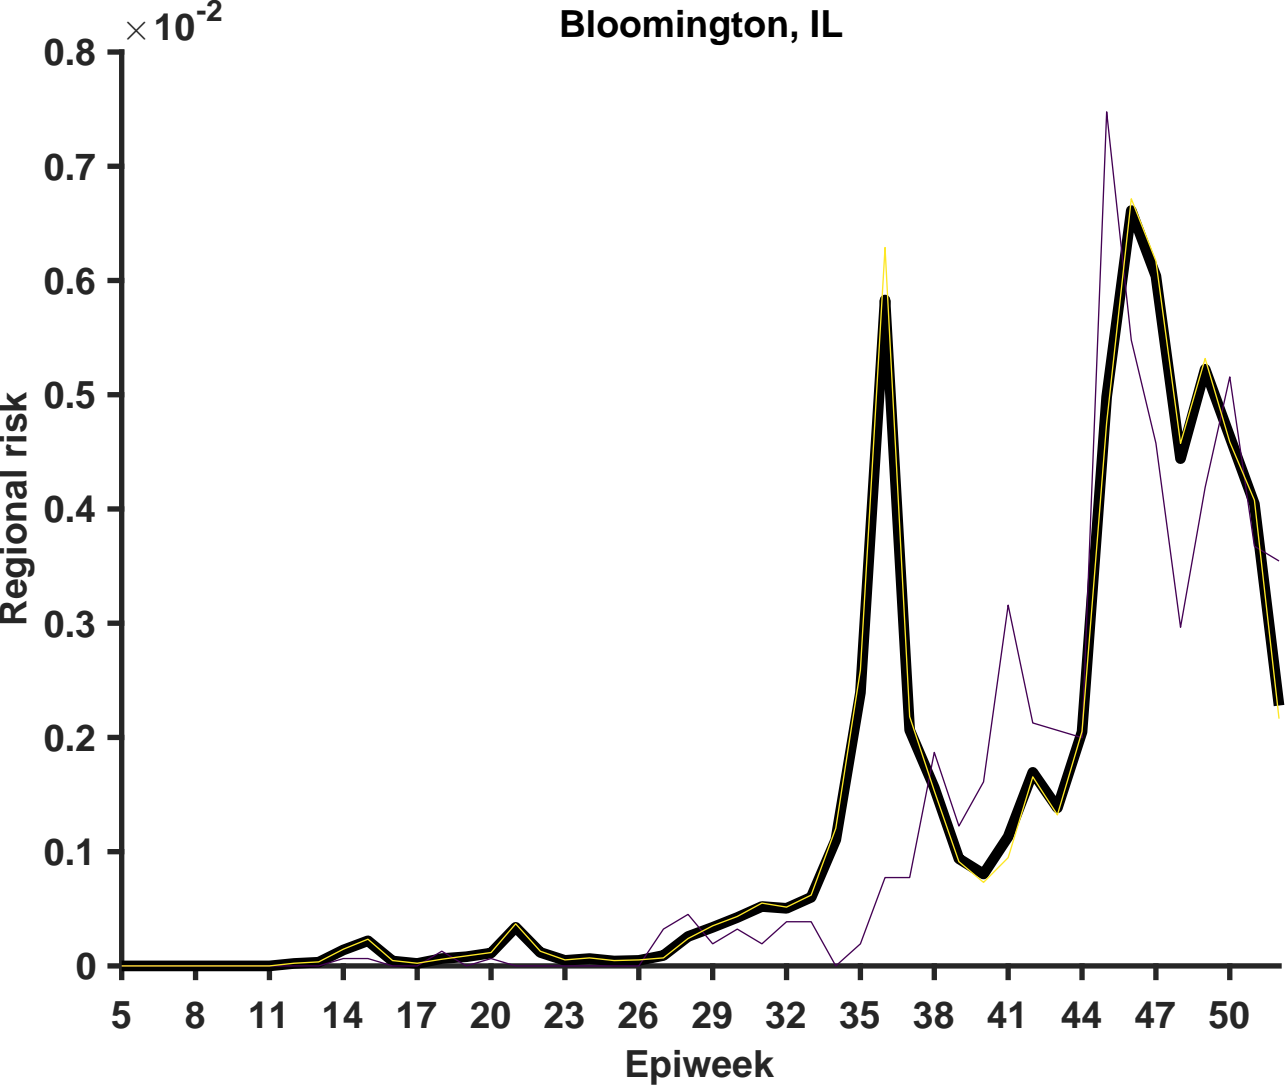

# Waterloo-Cedar Falls, IA

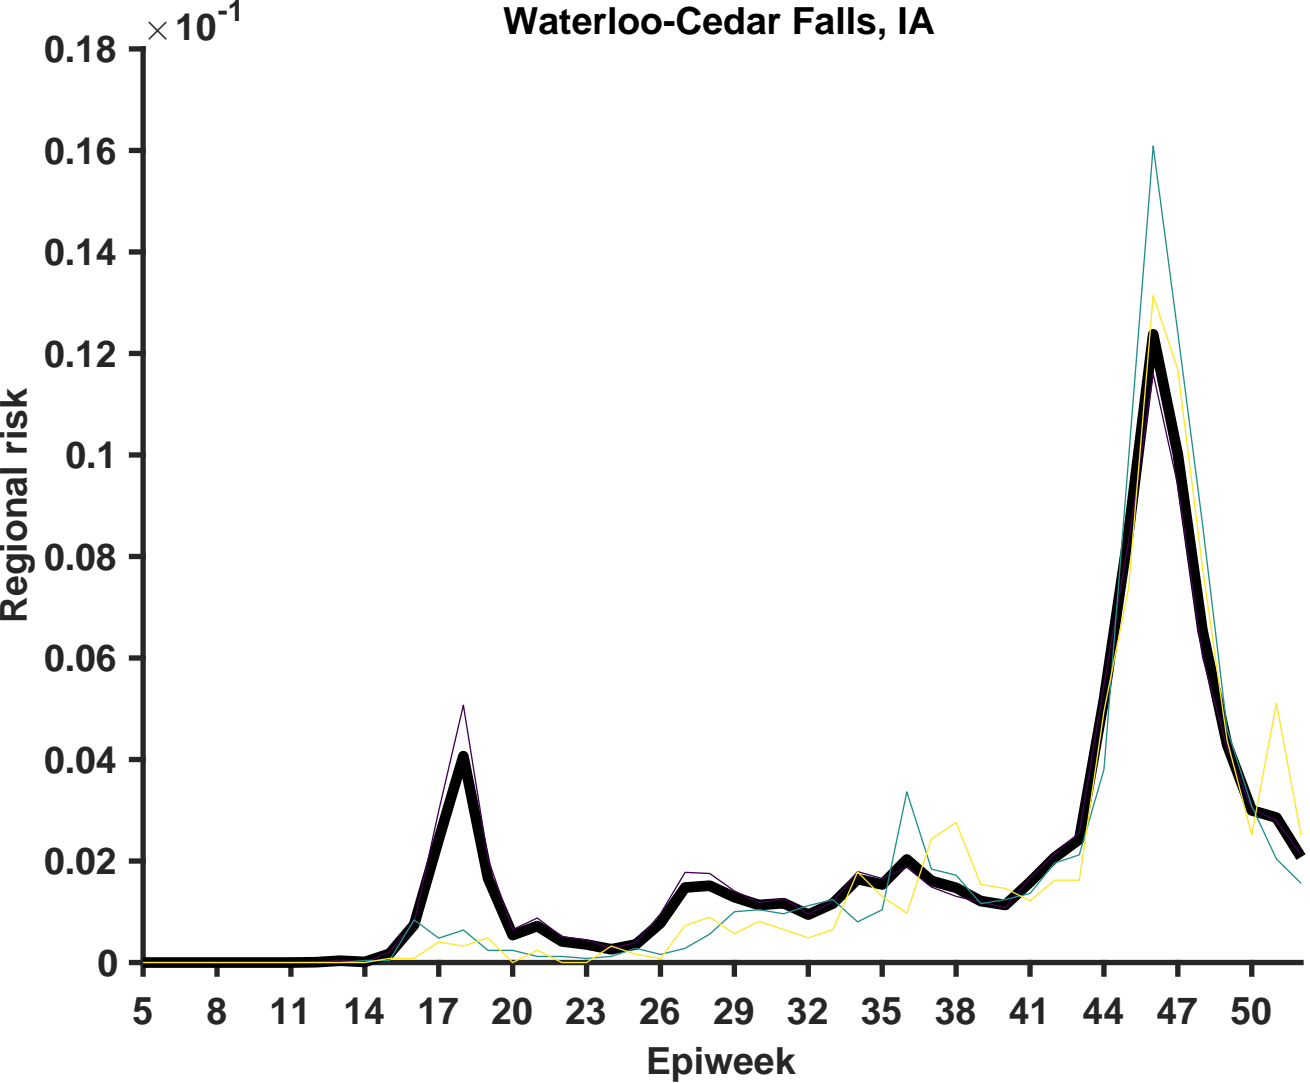

# Blacksburg-Christiansburg, VA

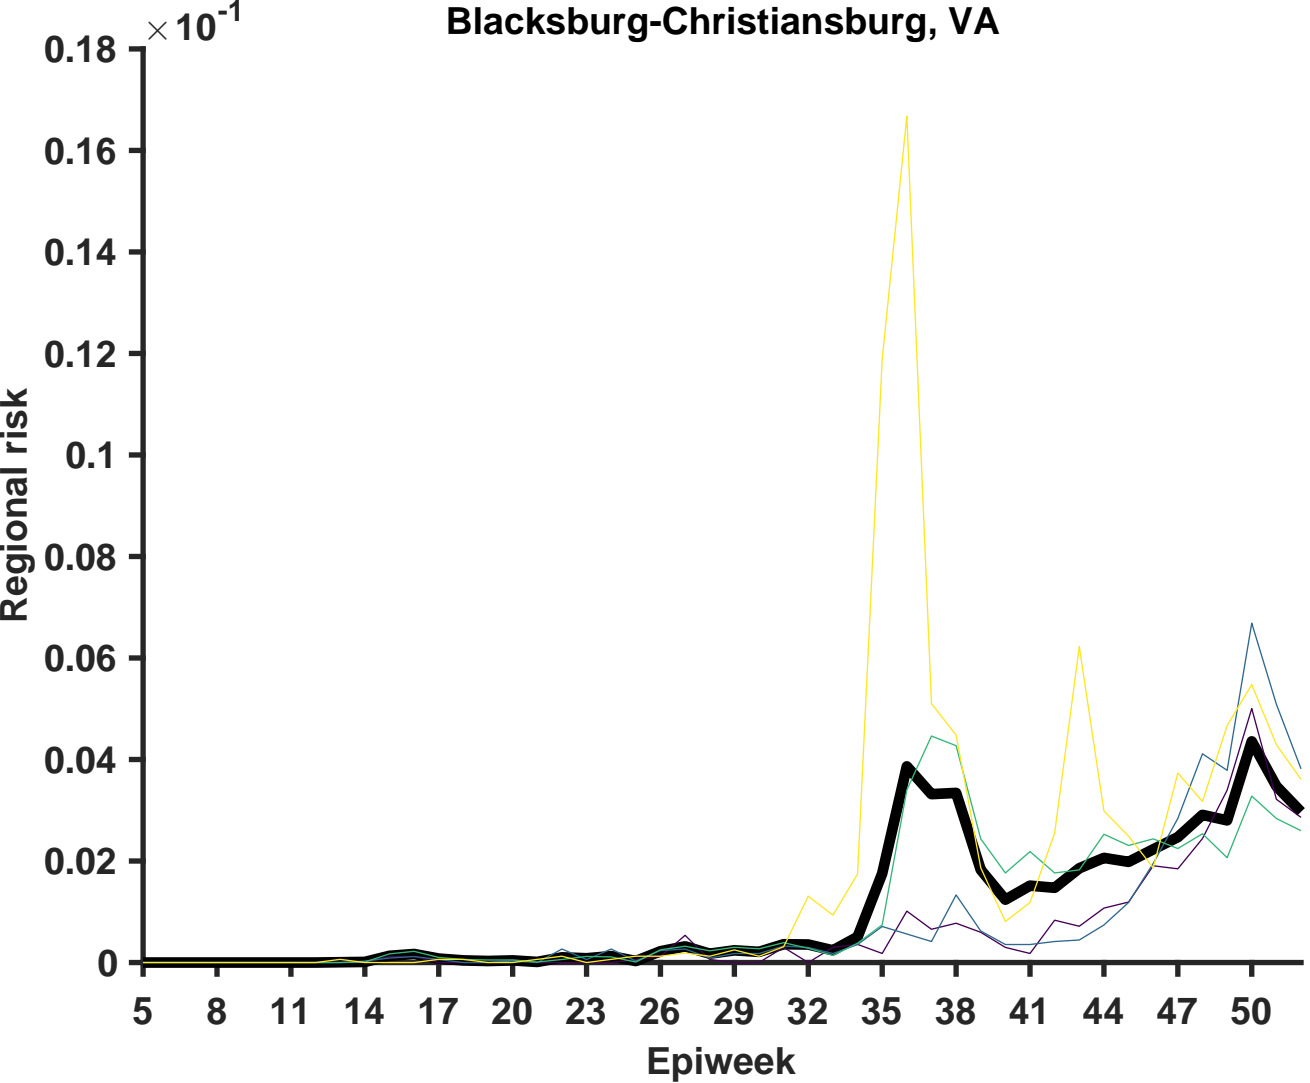



# Bloomington, IN

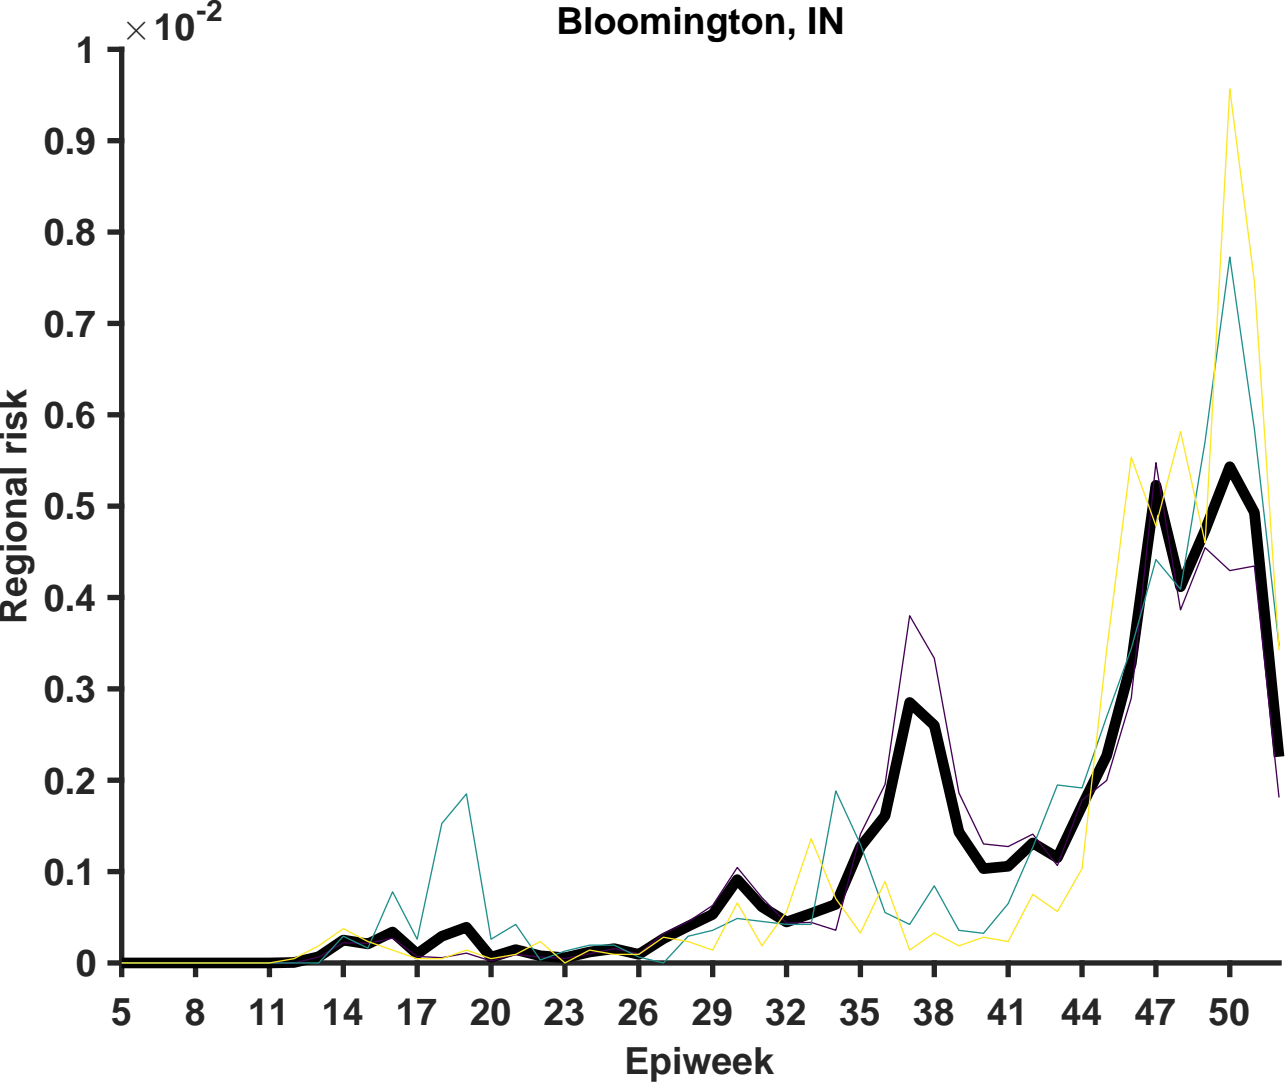

# Idaho Falls, ID

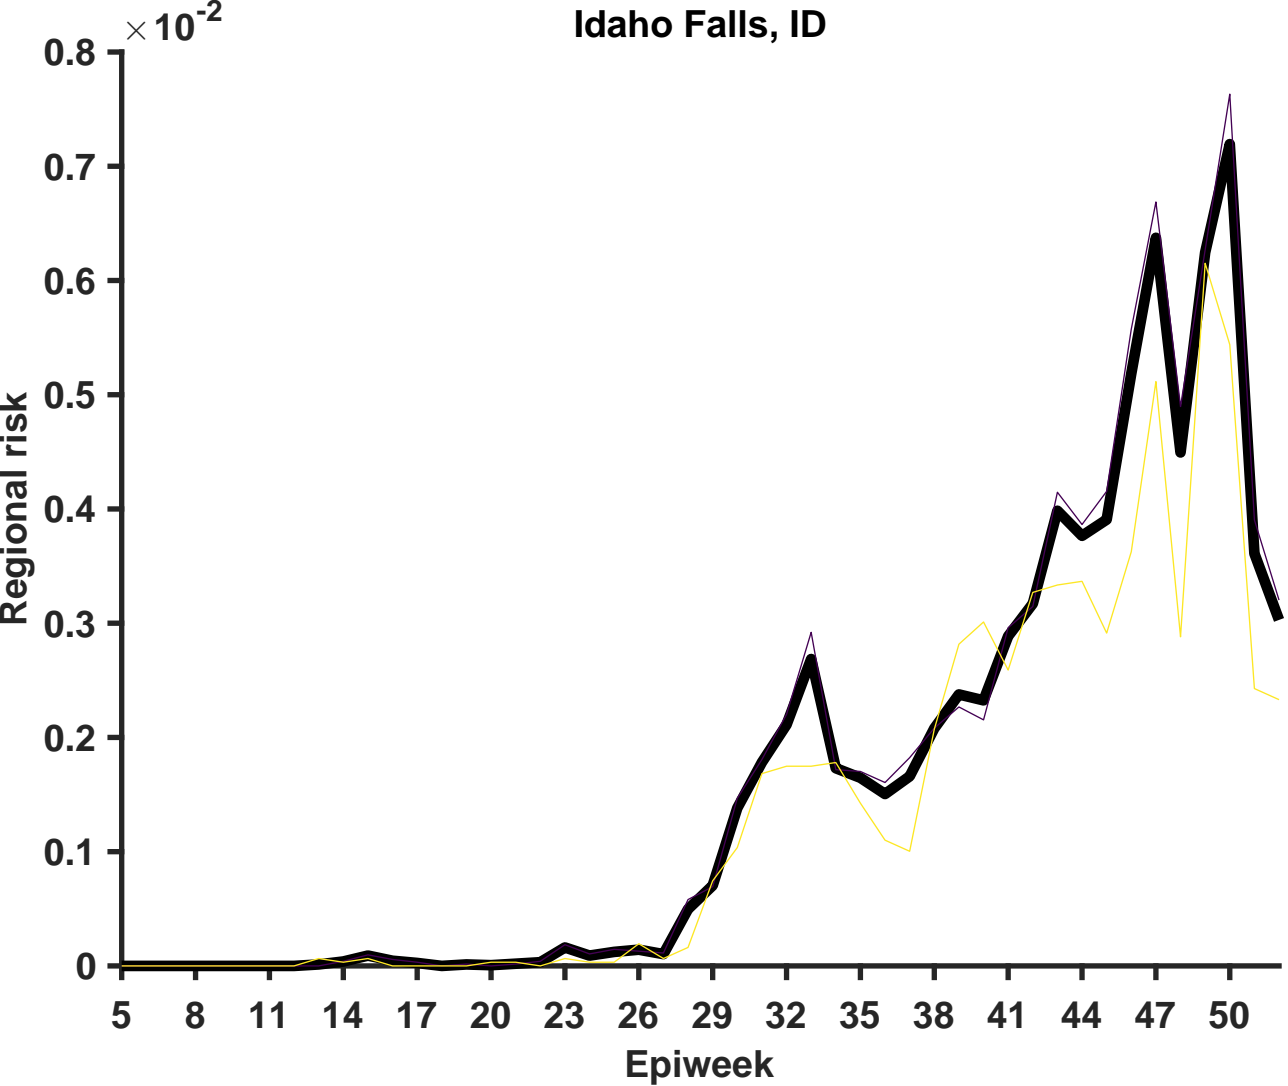

# Decatur, AL

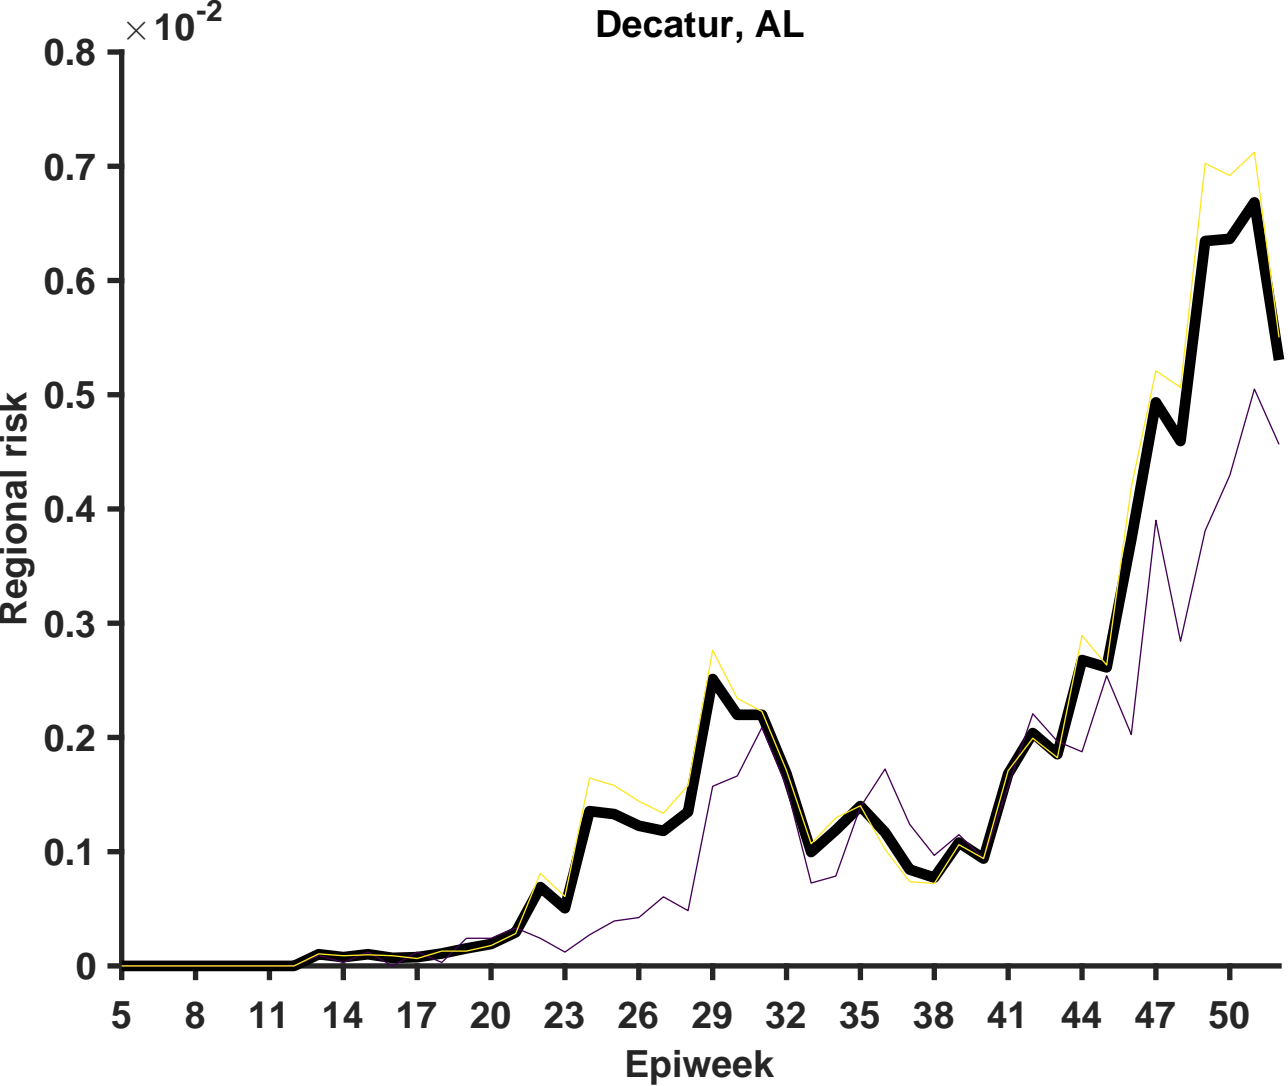

# Elizabethtown-Fort Knox, KY

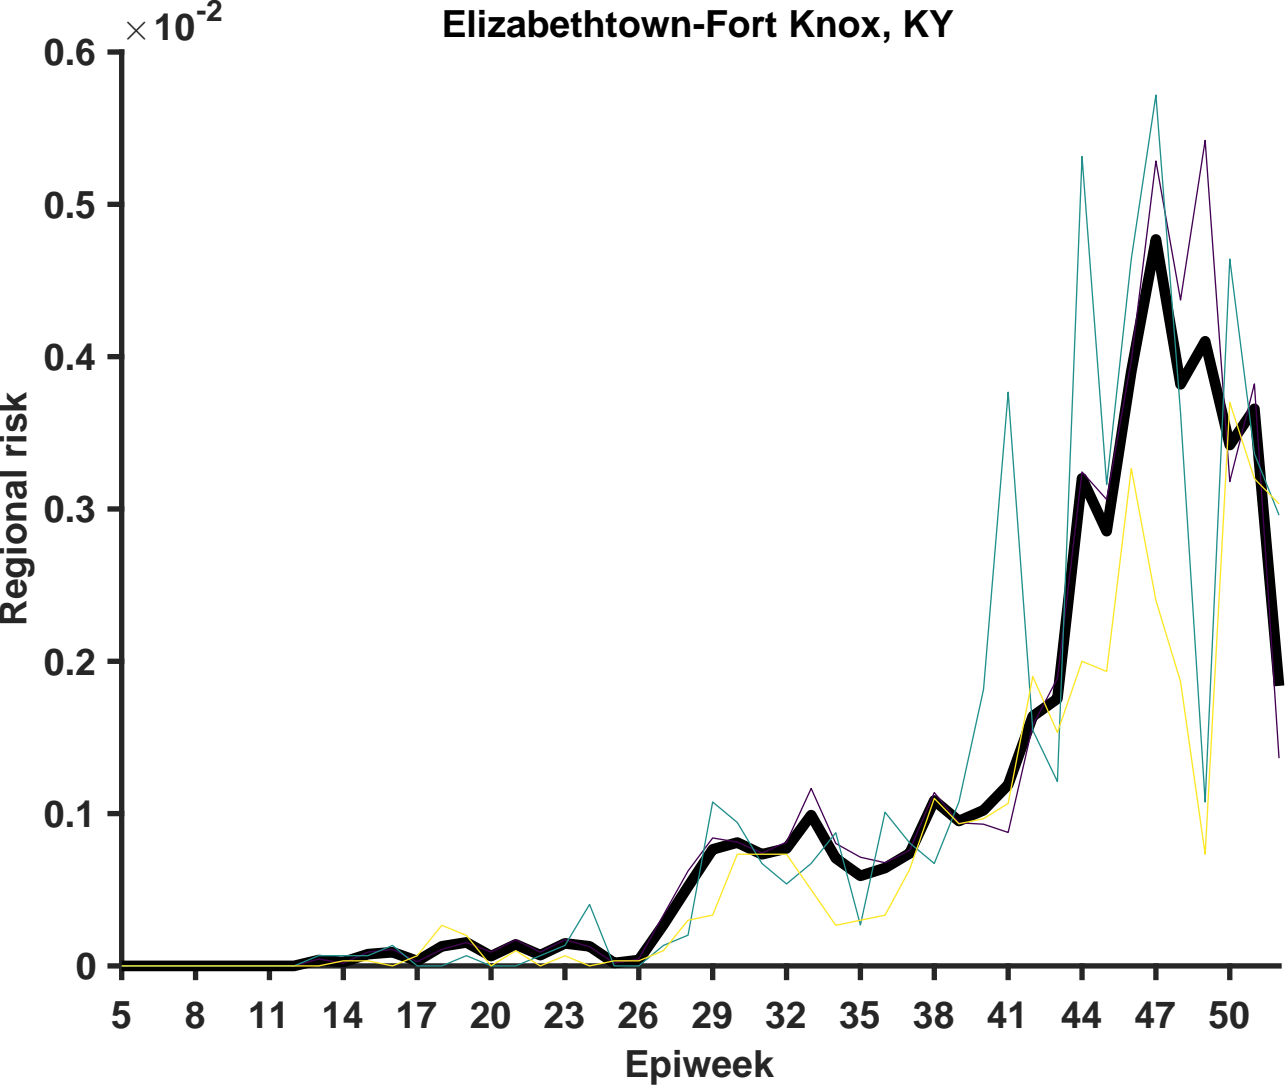

# Alexandria, LA

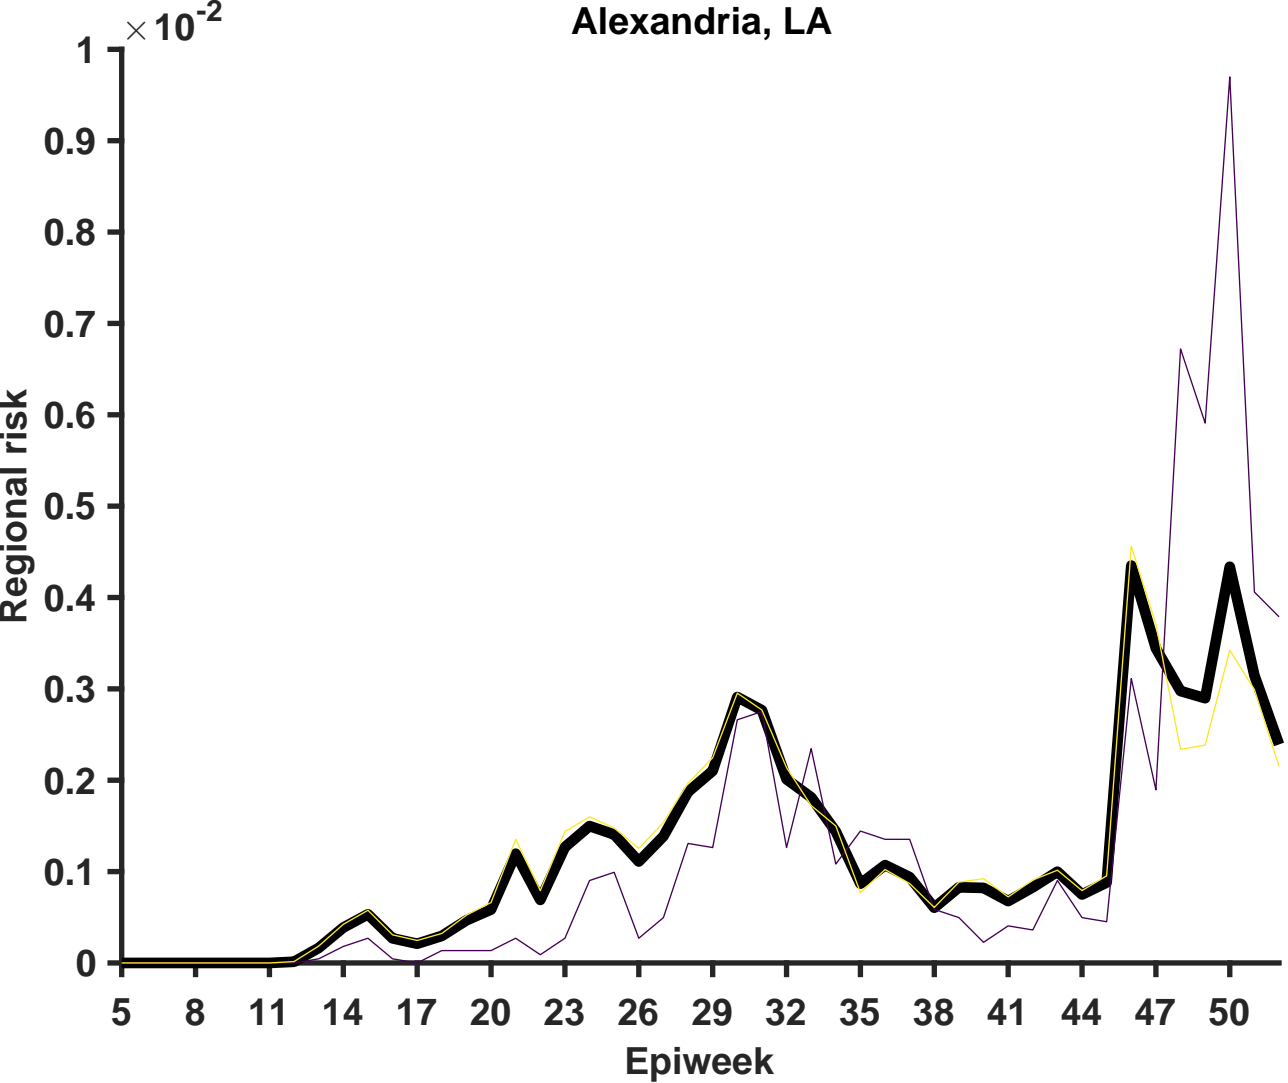

# Dothan, AL

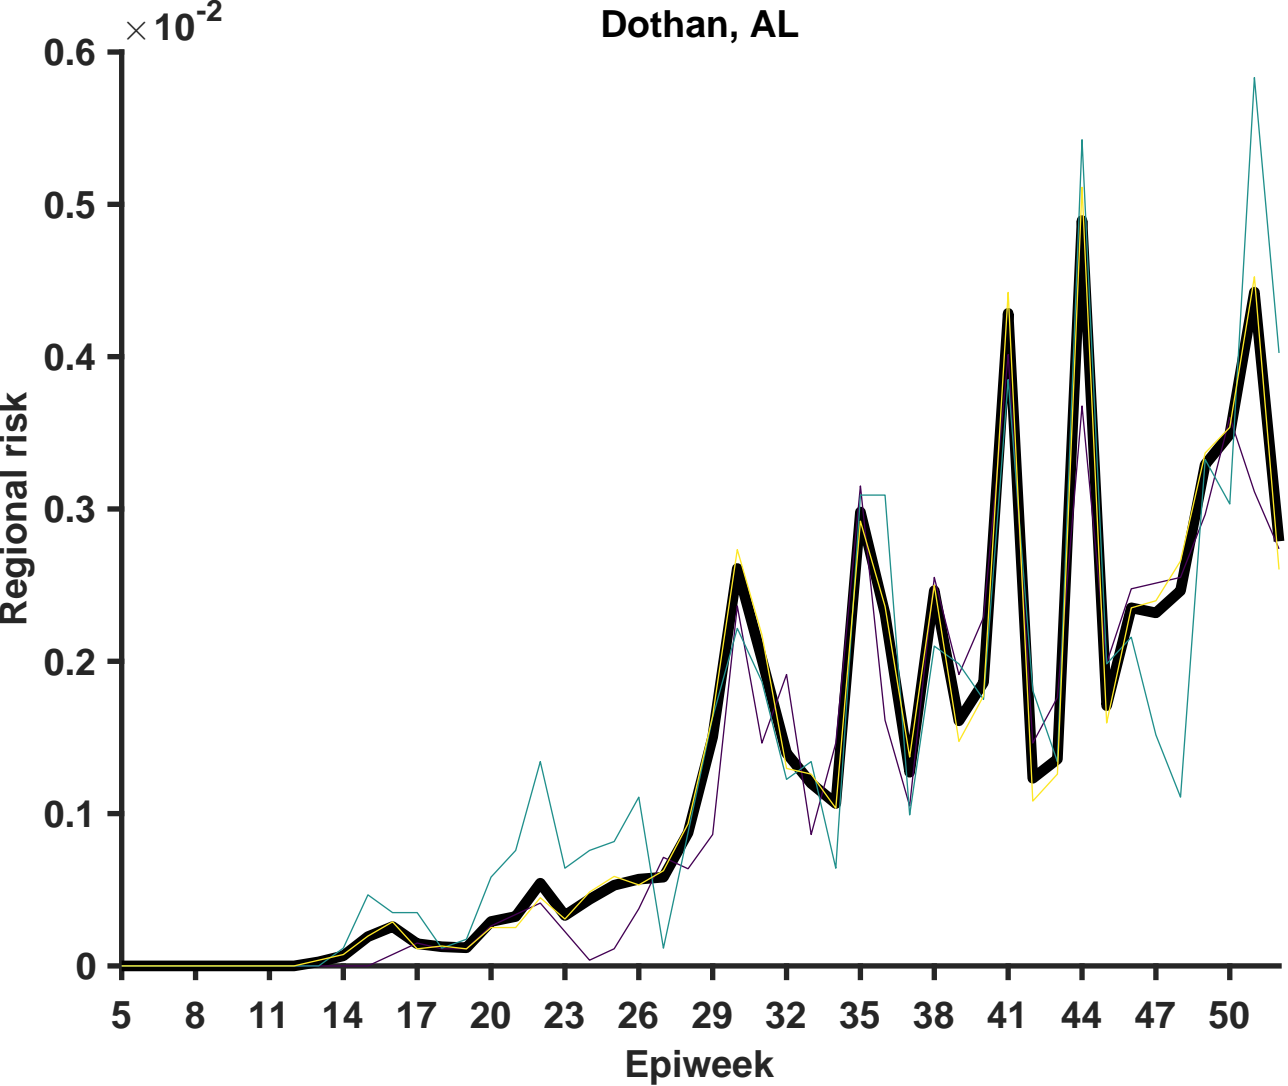

# Florence-Muscle Shoals, AL

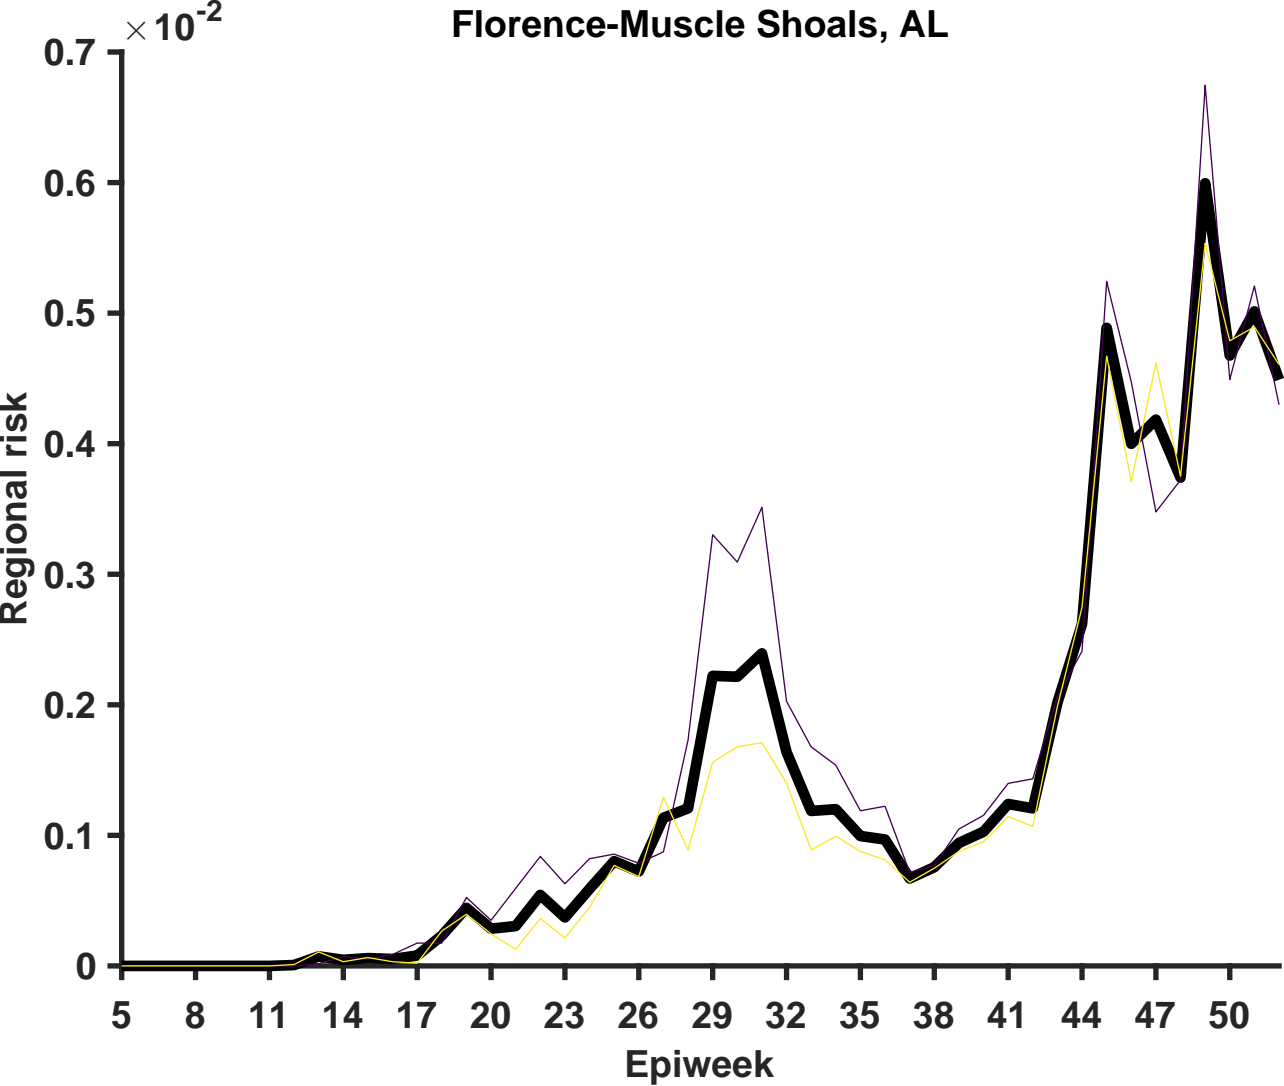

# Jefferson City, MO

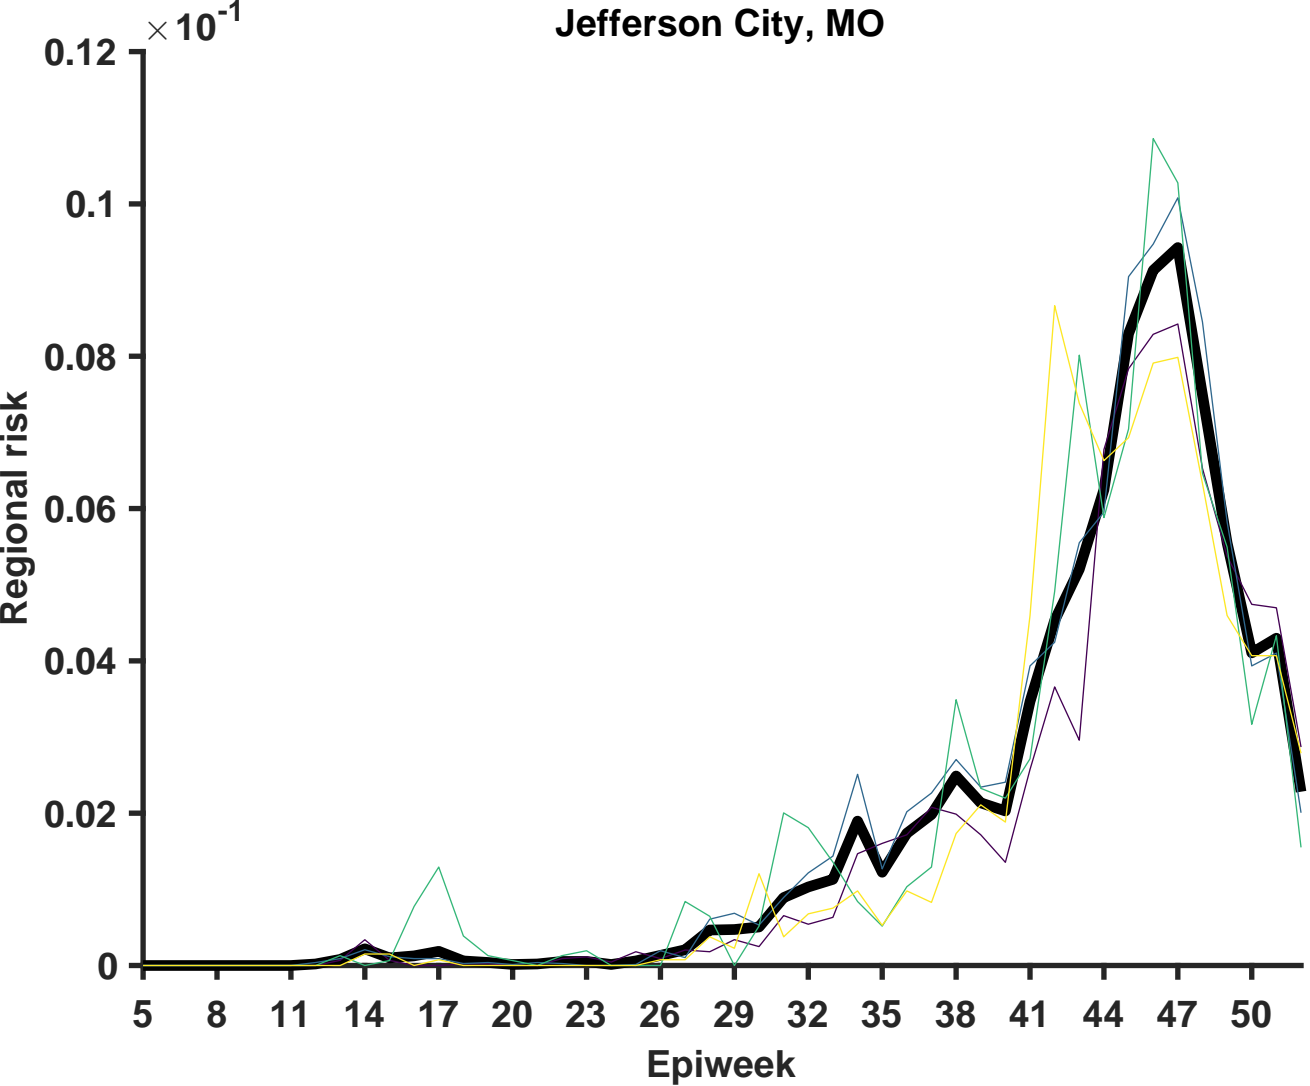



# Sioux City, IA-NE-SD

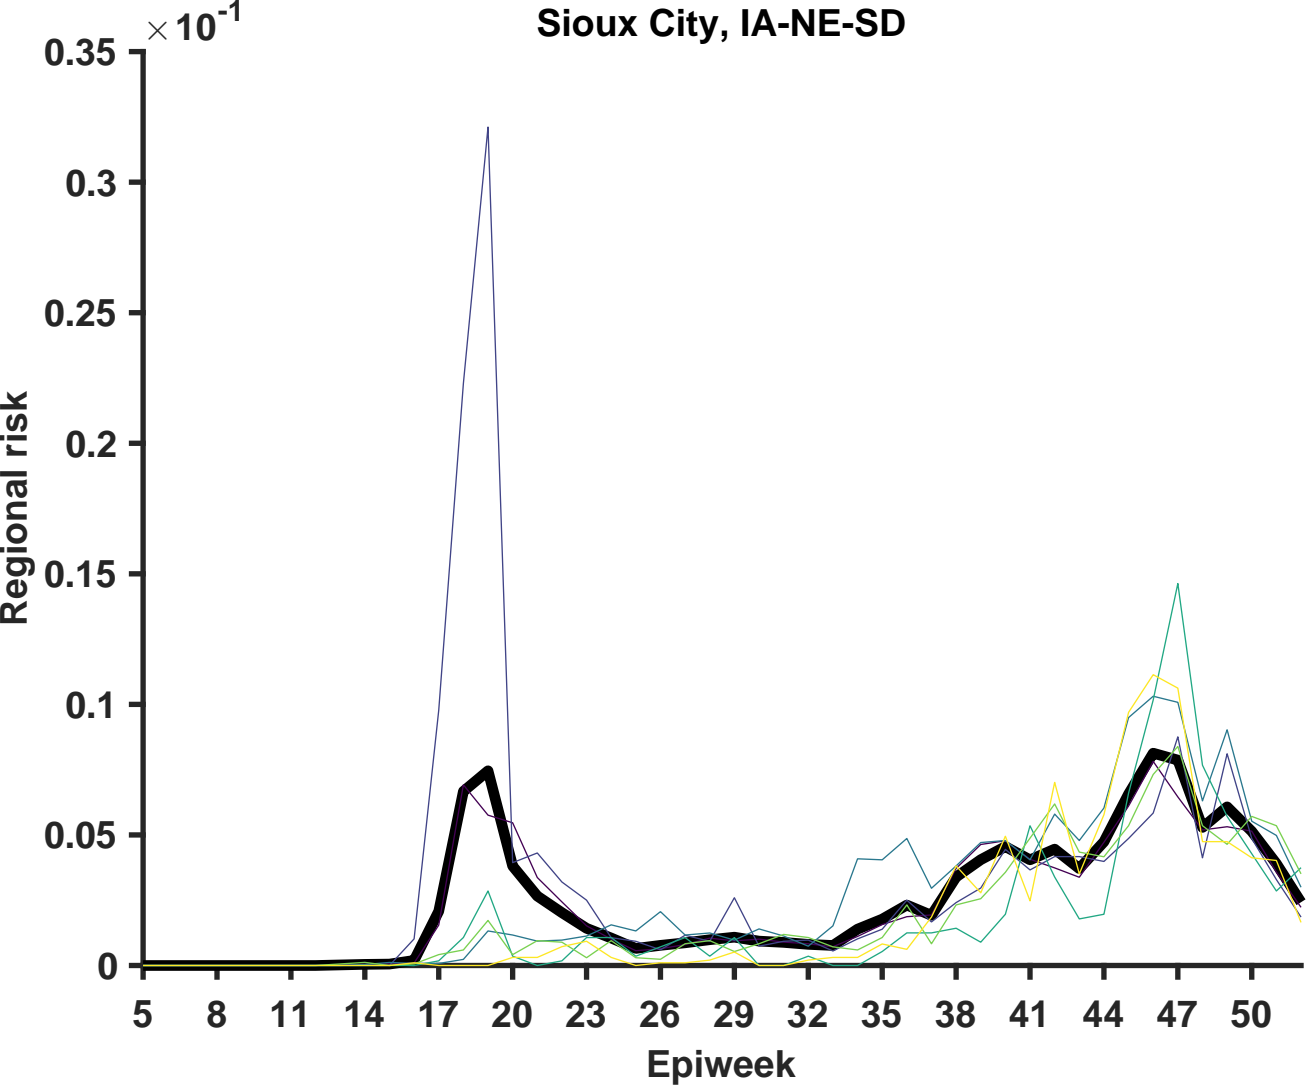

# Albany, GA

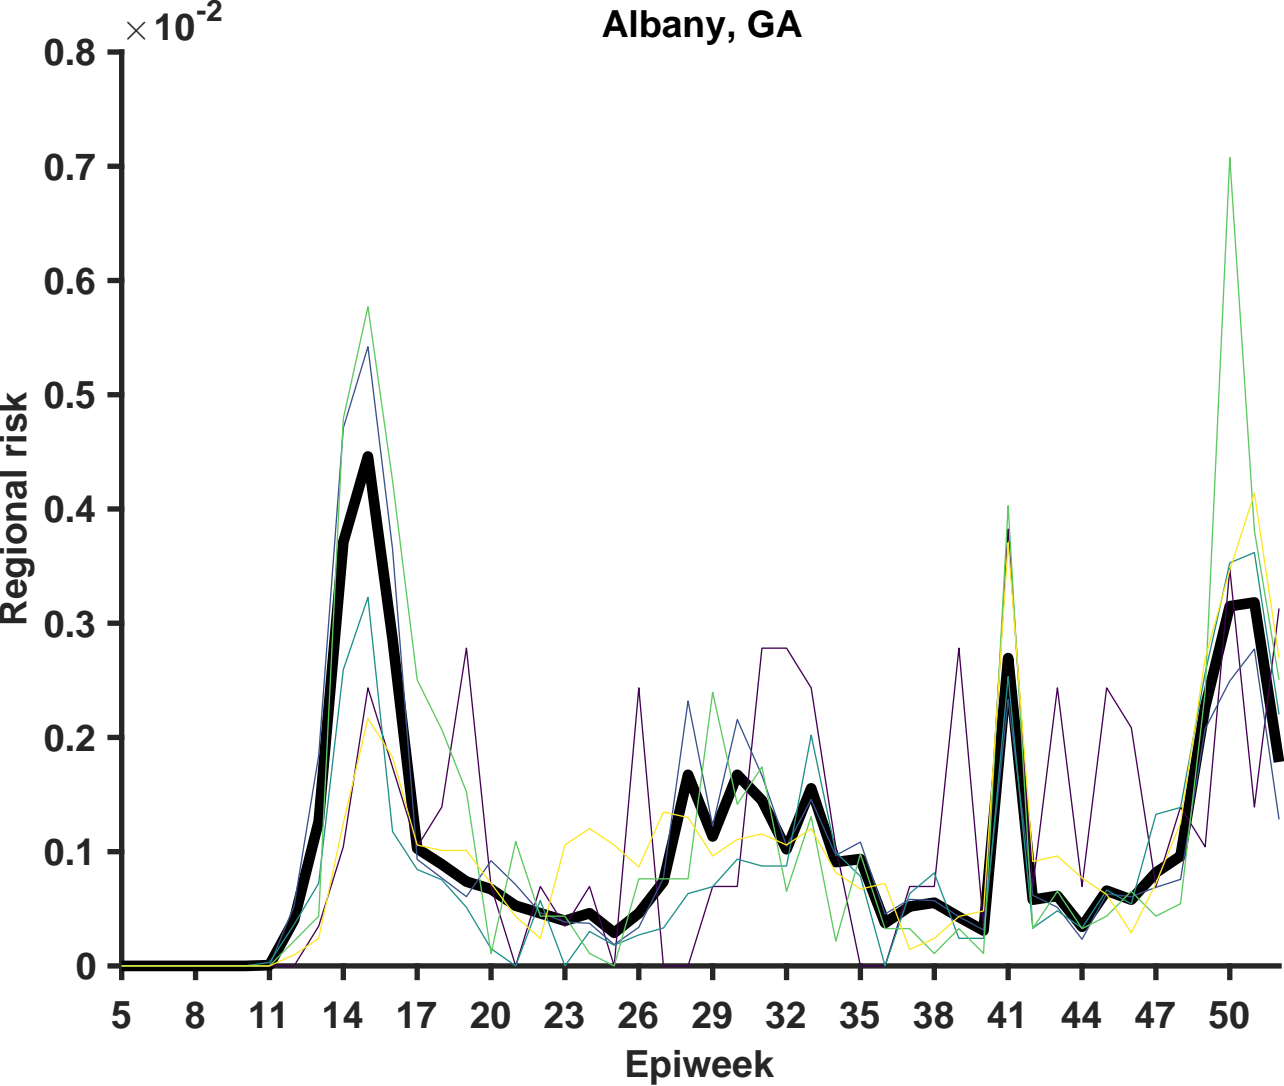

# Wichita Falls, TX

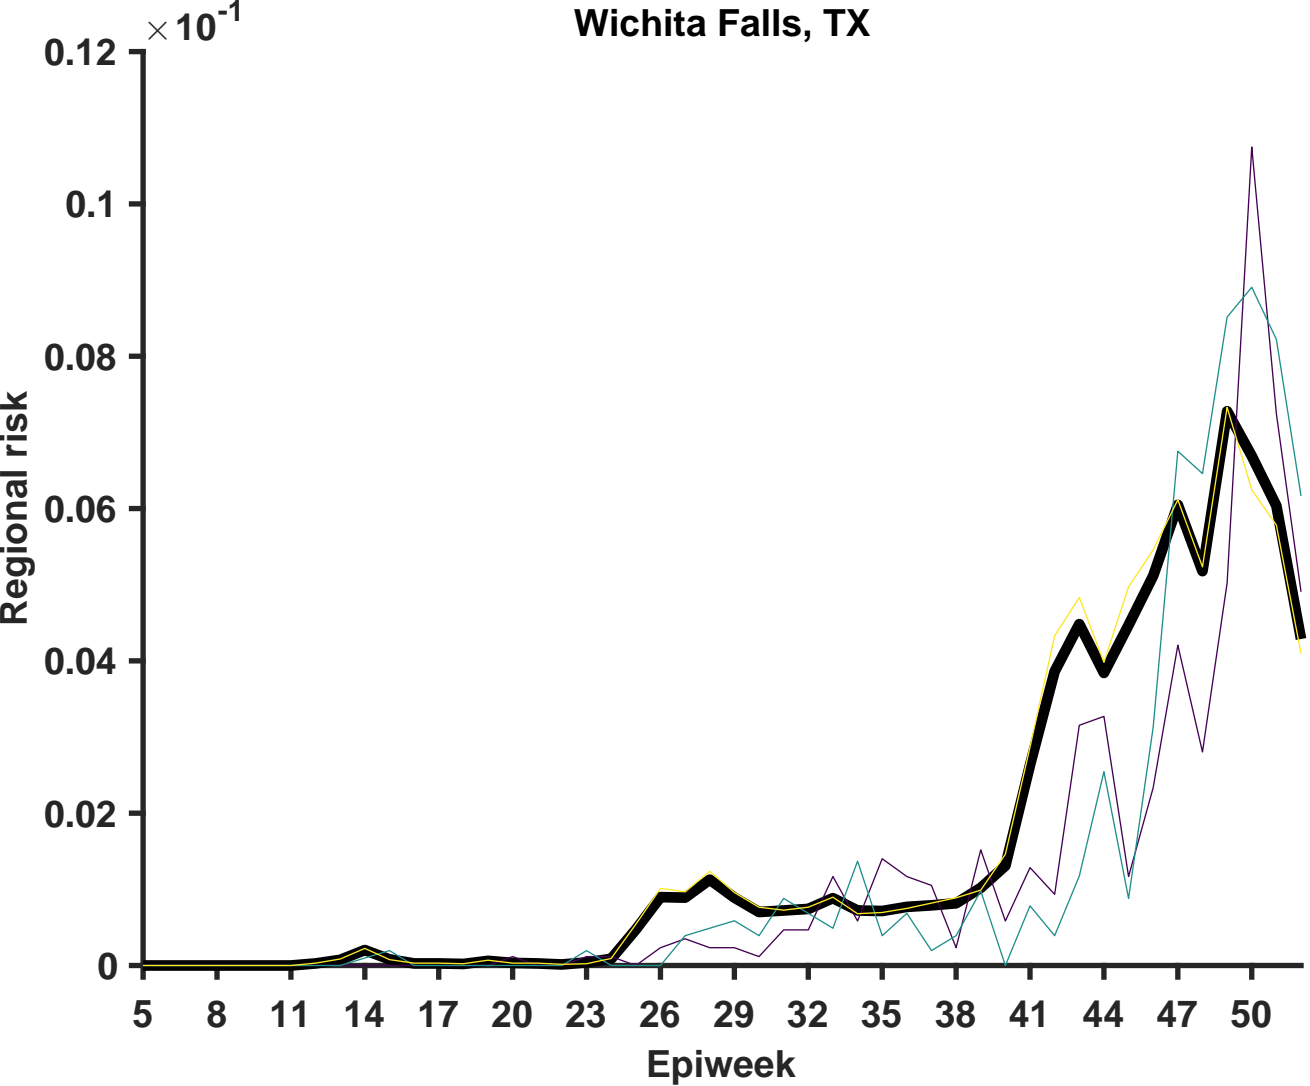

# Valdosta, GA

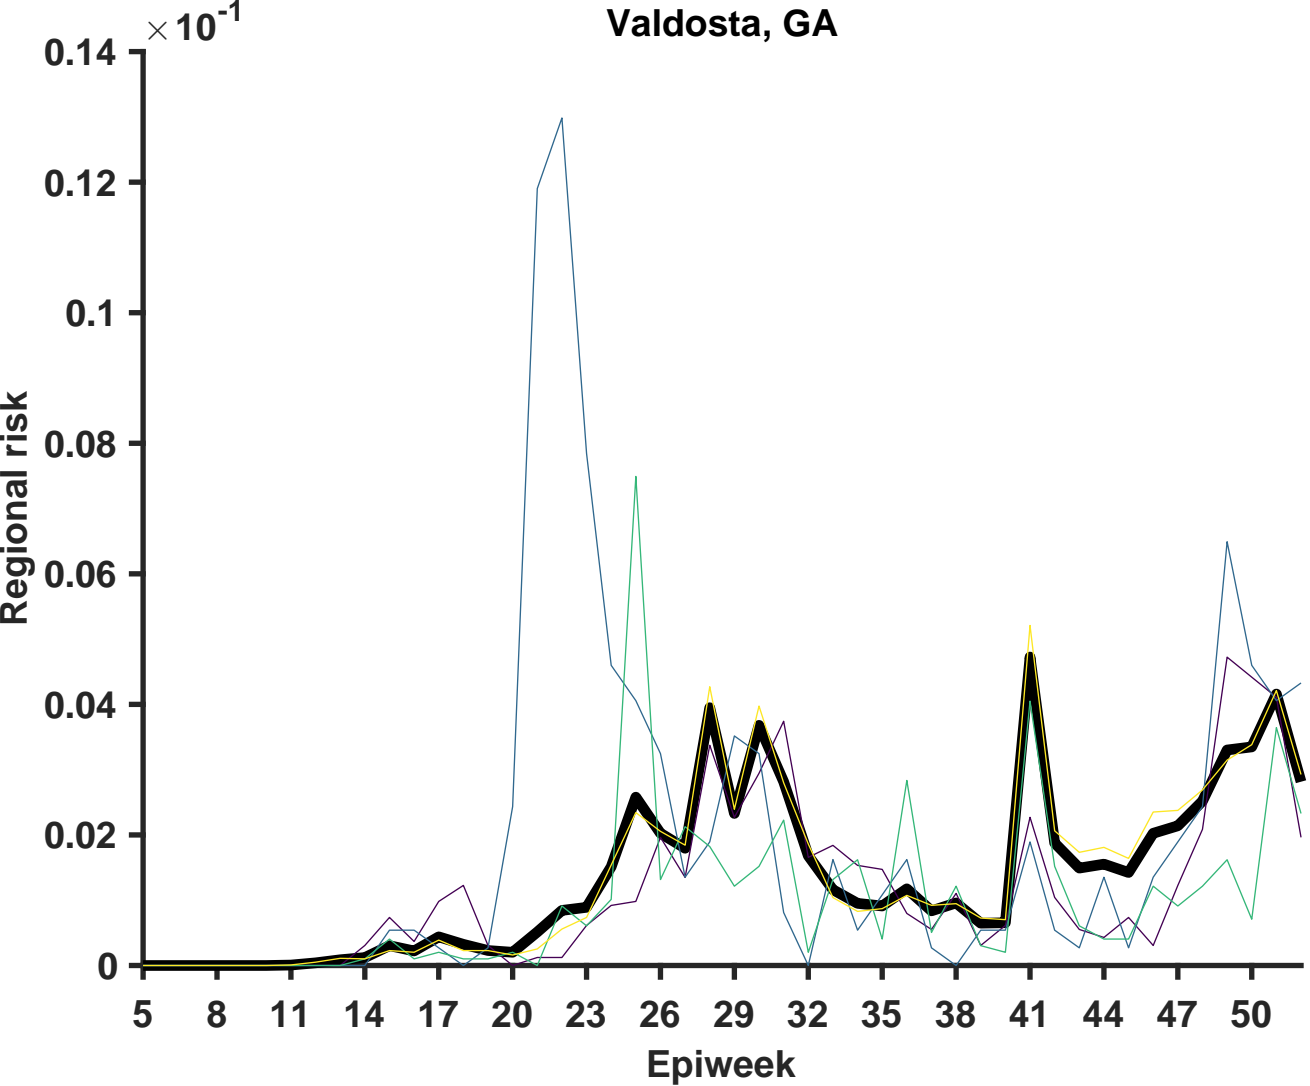

# Texarkana, TX-AR

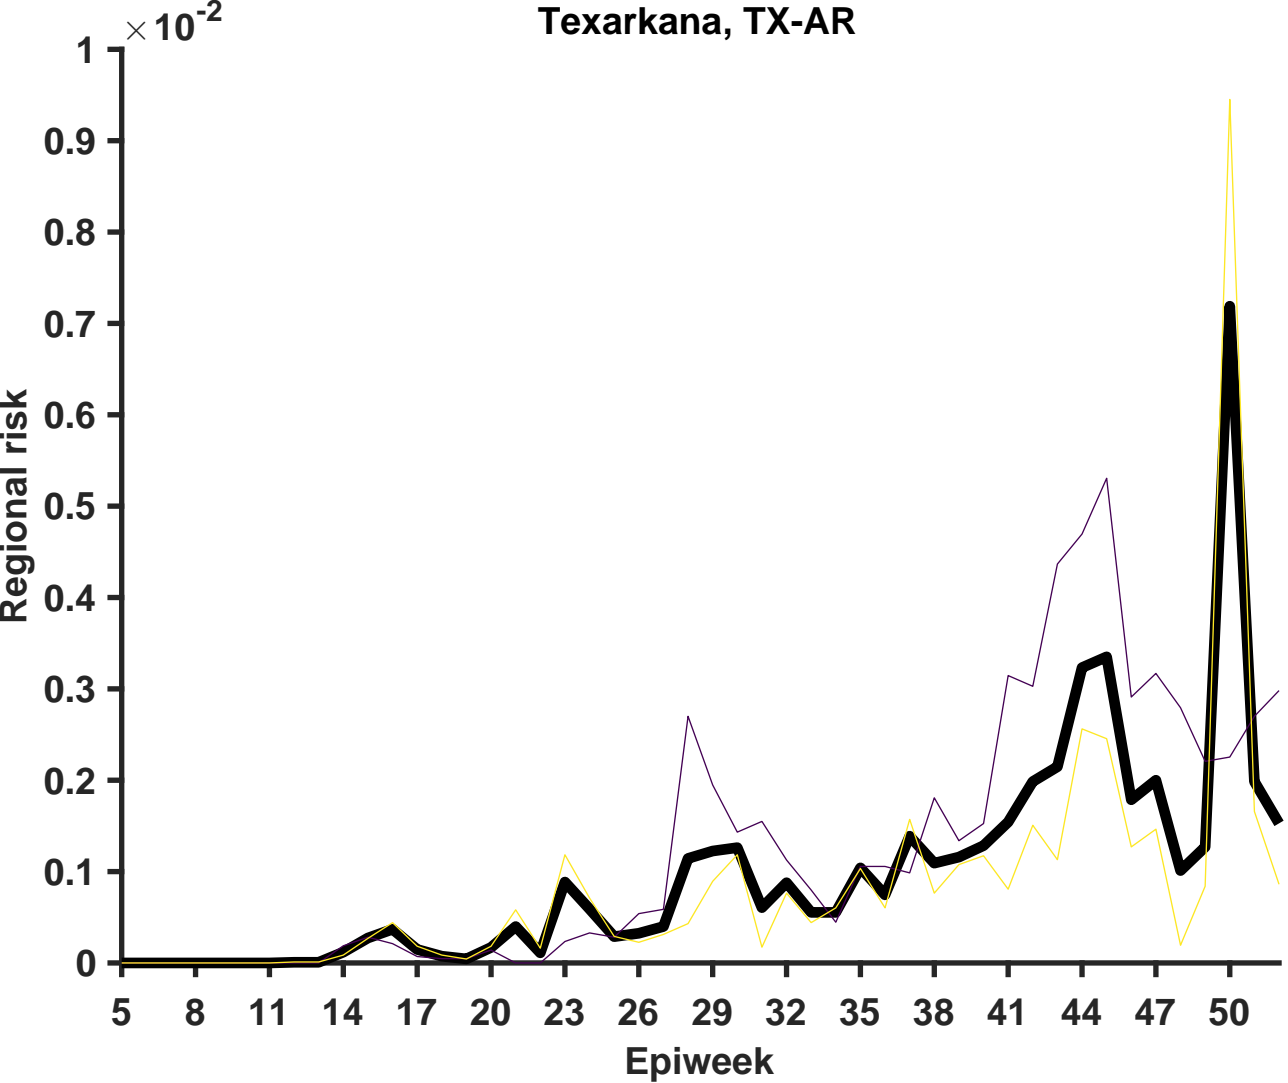

# Logan, UT-ID

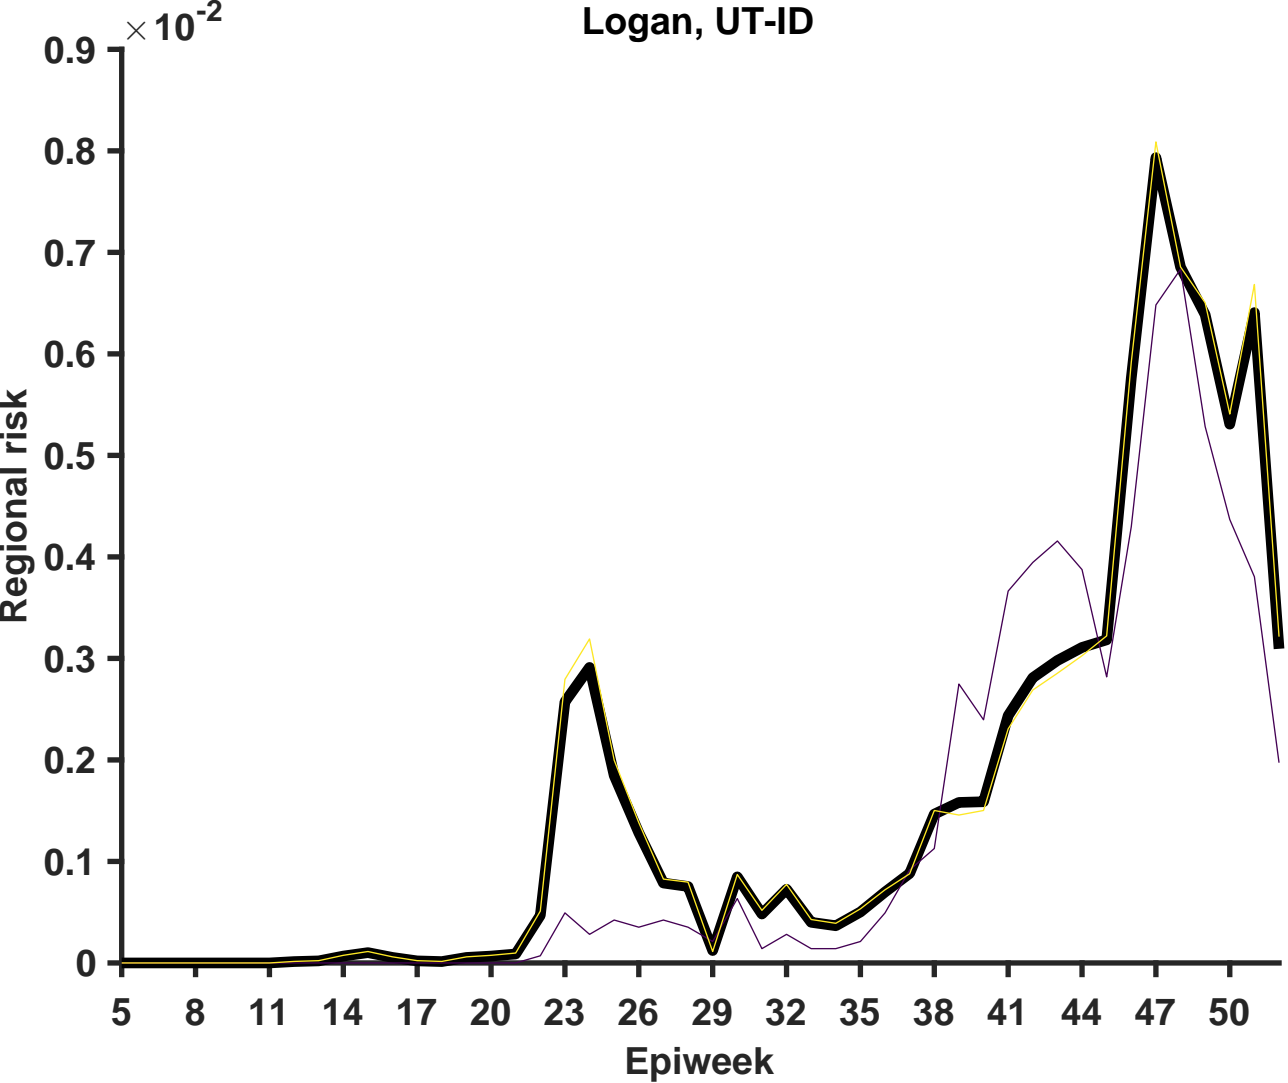

# Rocky Mount, NC

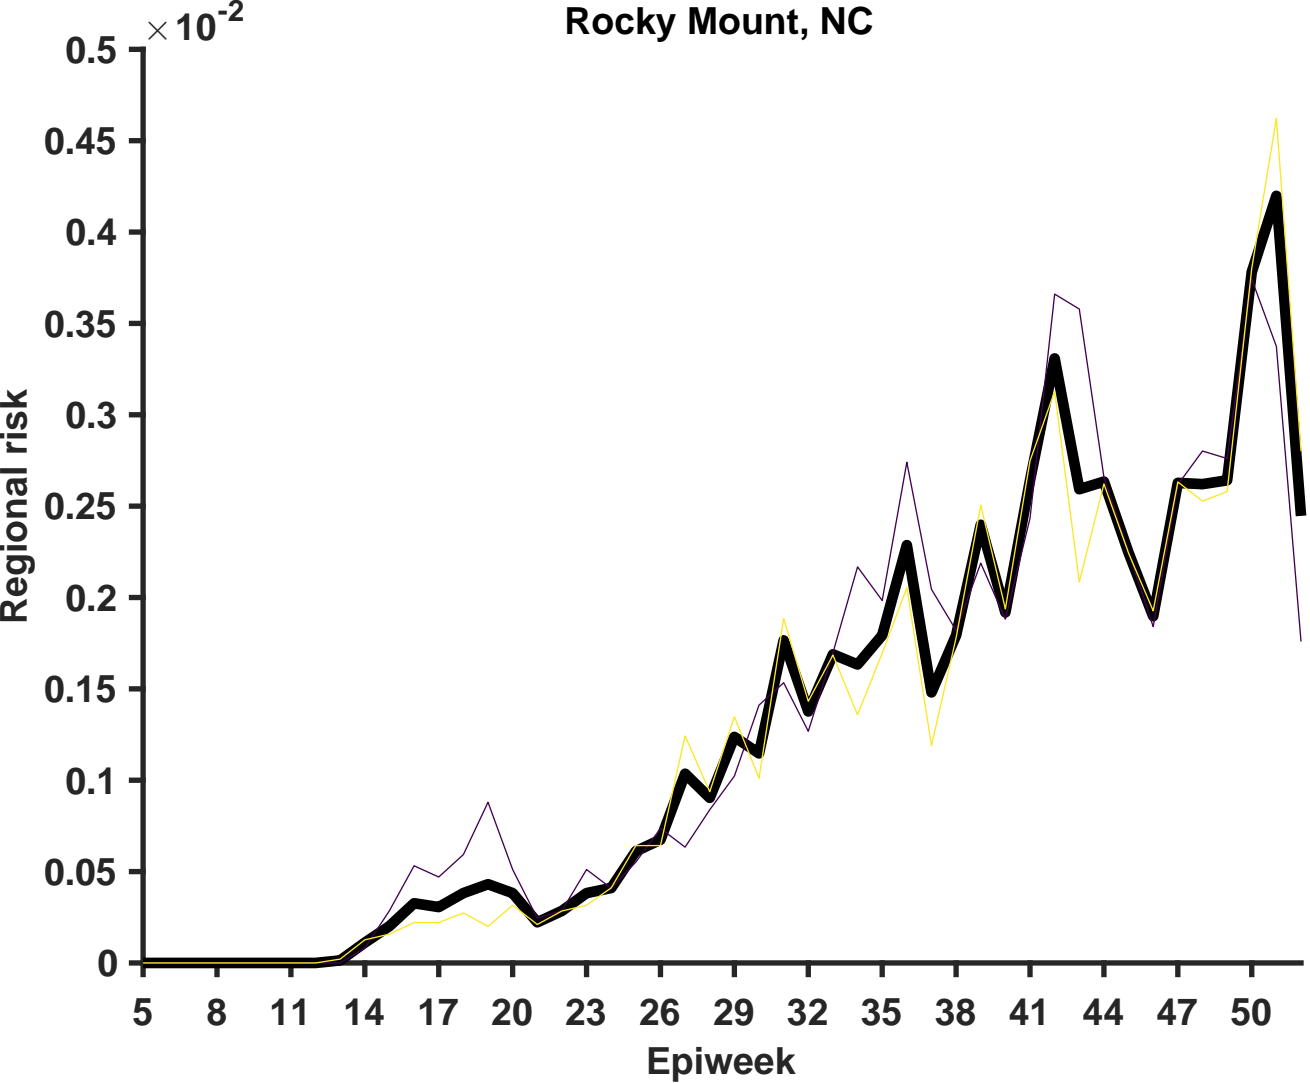

# Dalton, GA

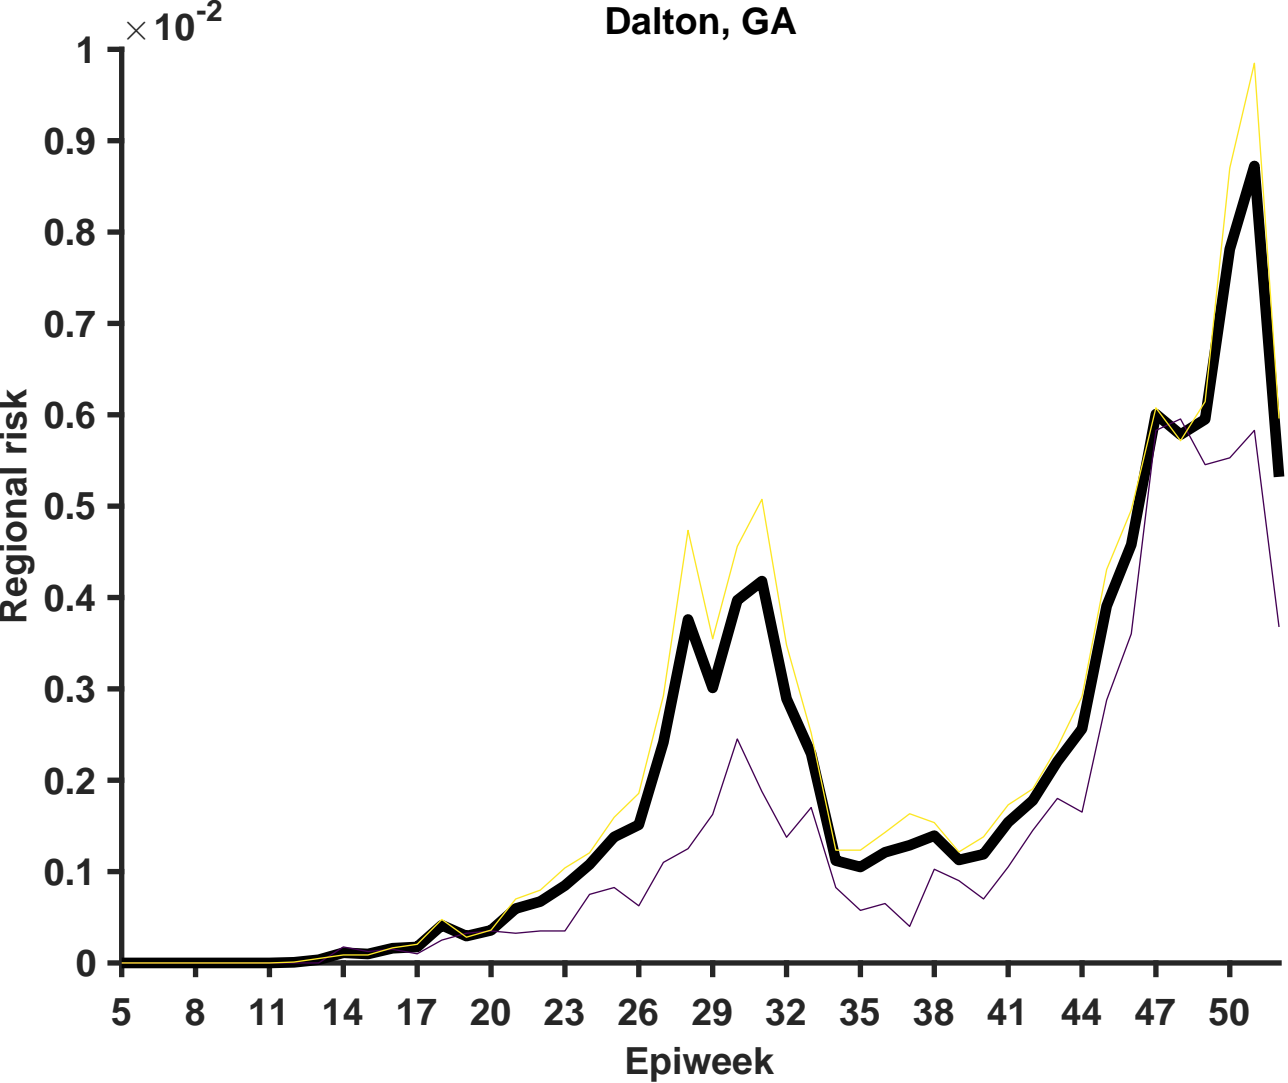



# Morristown, TN

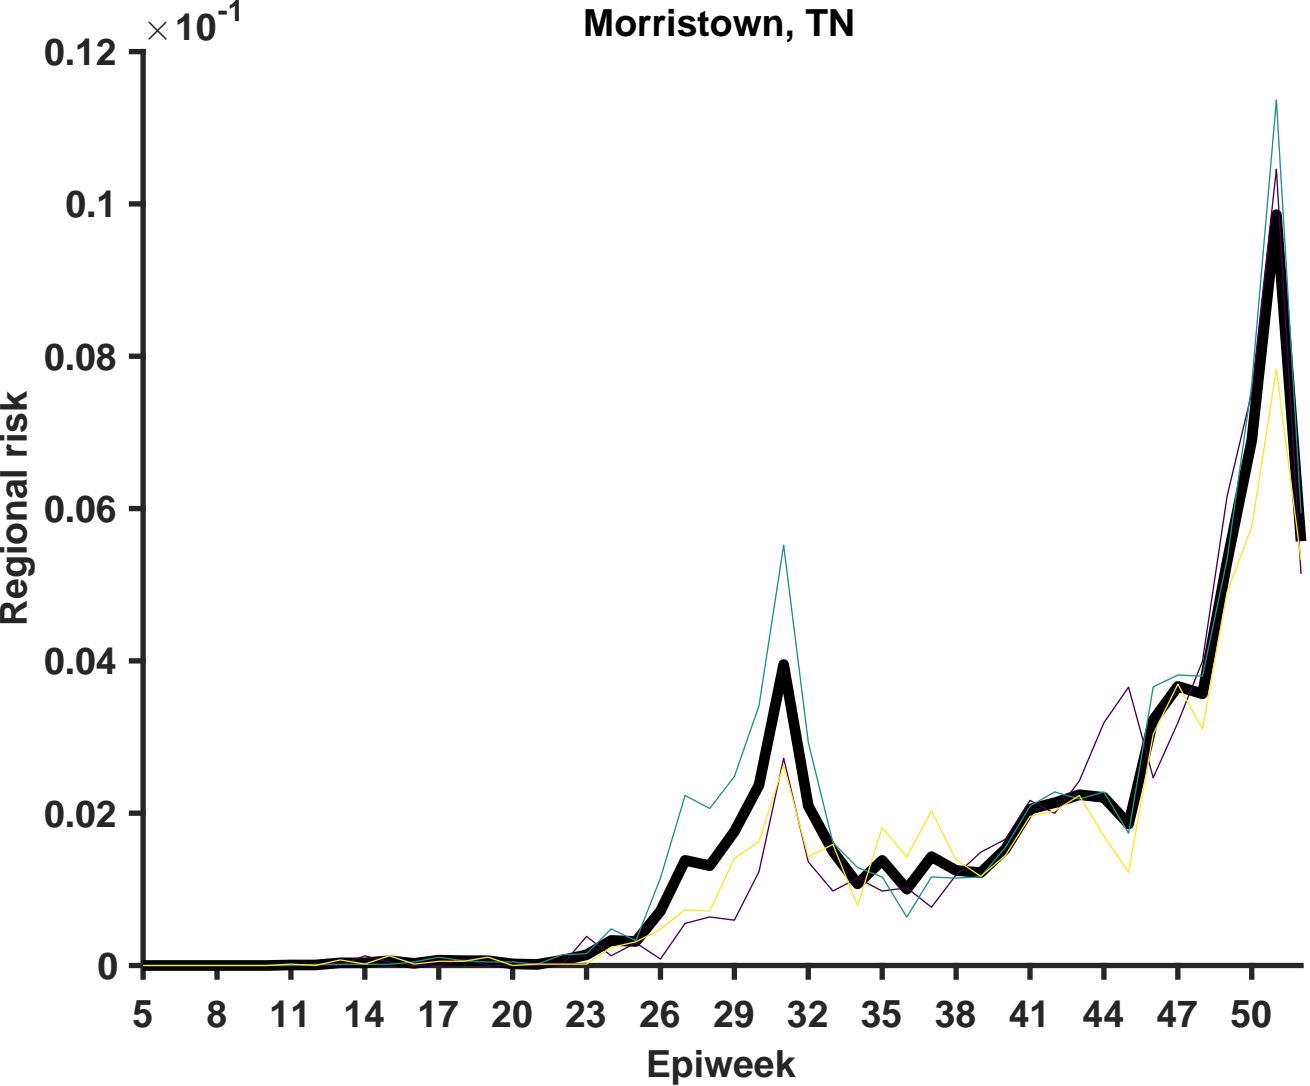

# Winchester, VA-WV

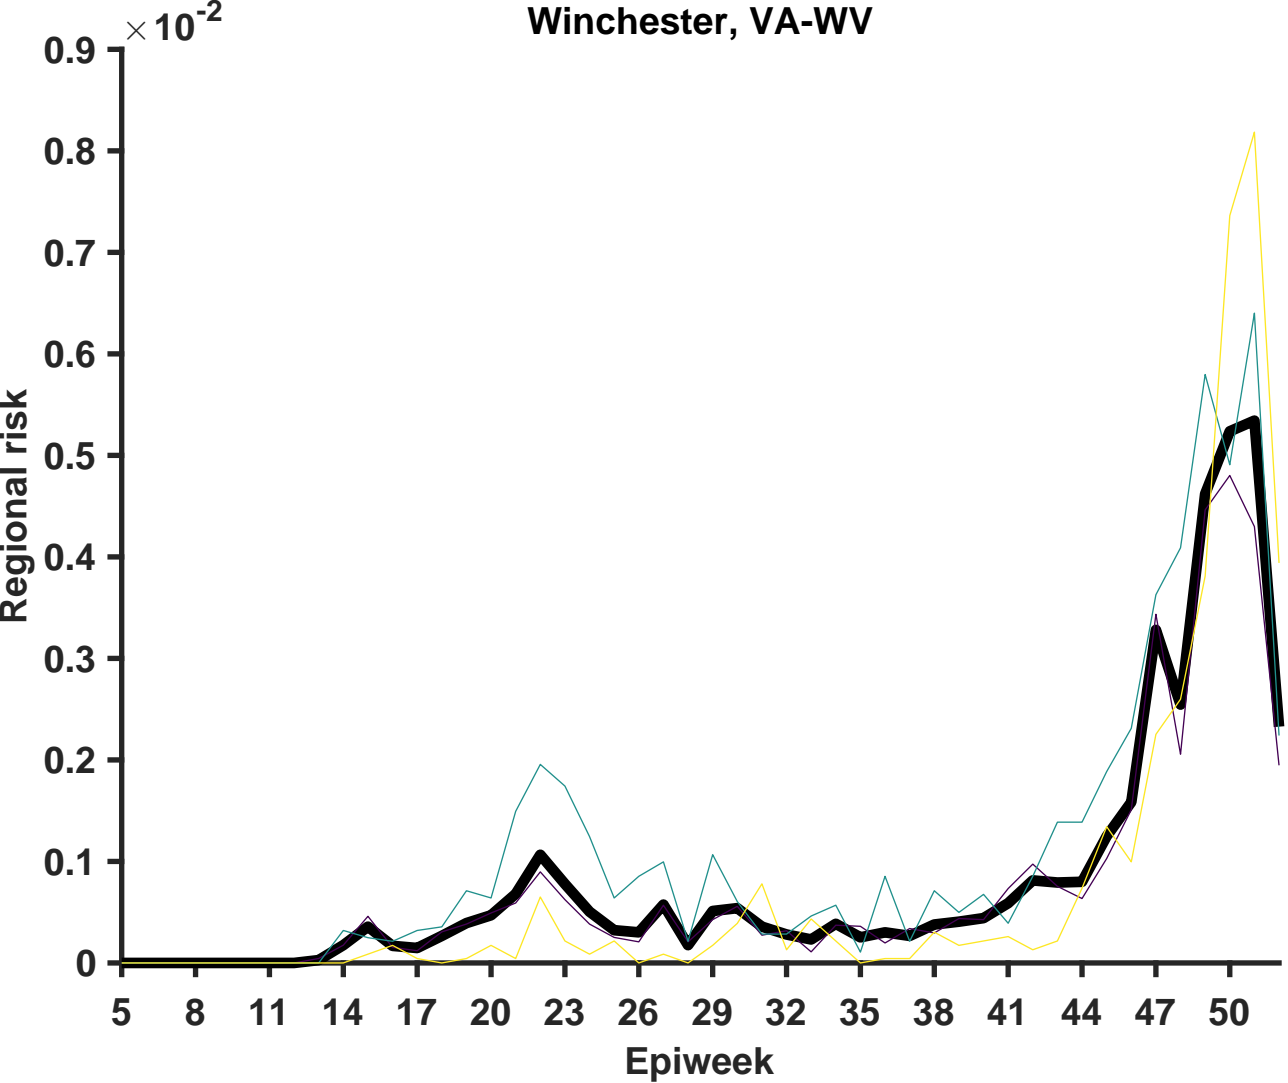

# Morgantown, WV

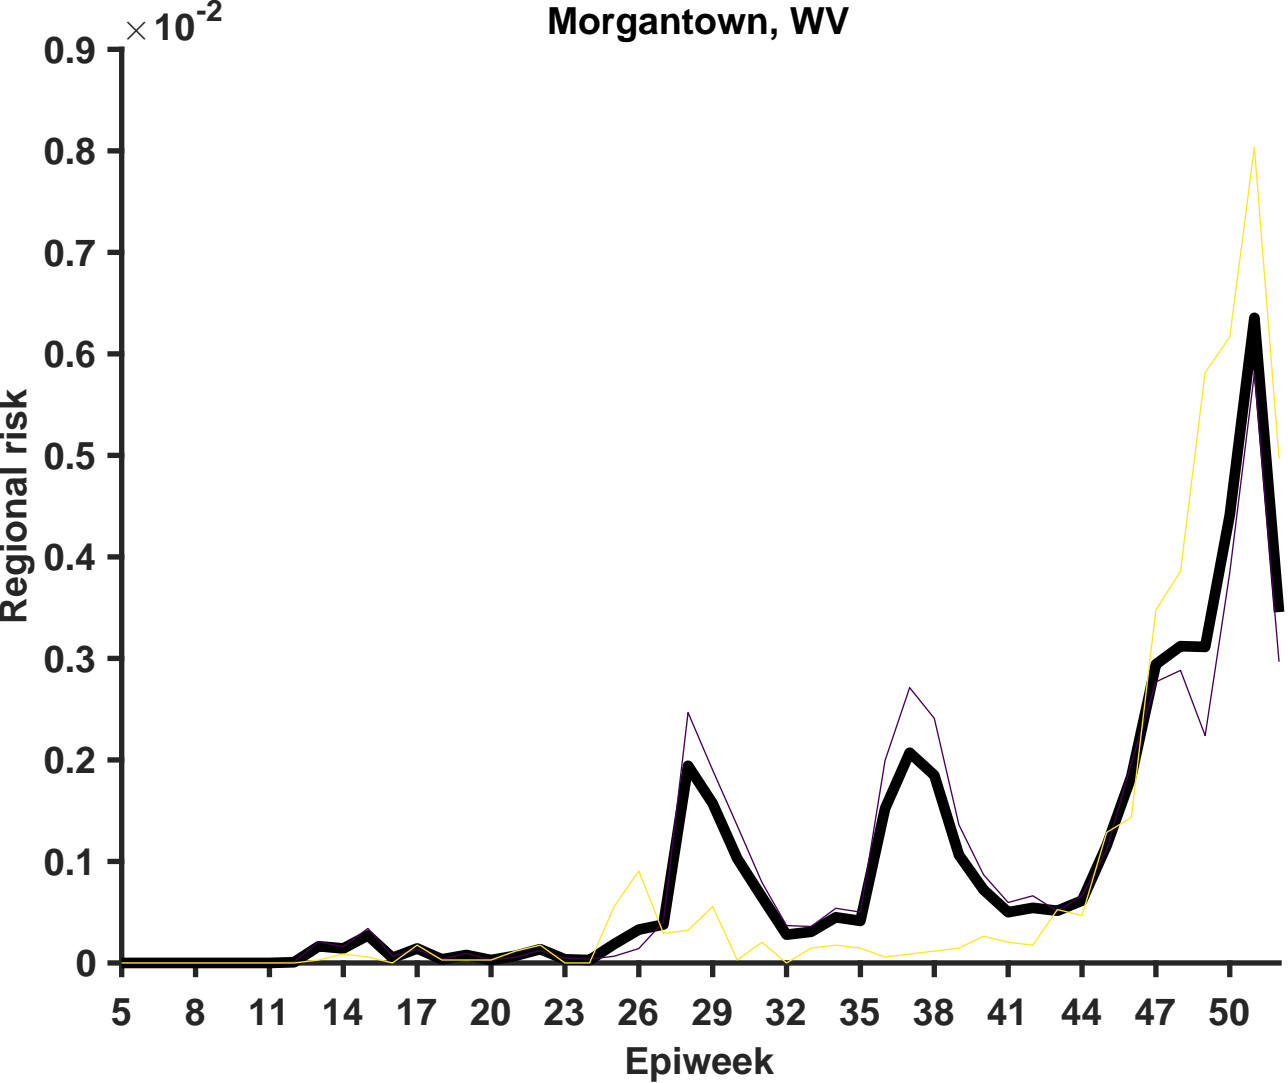

# La Crosse-Onalaska, WI-MN

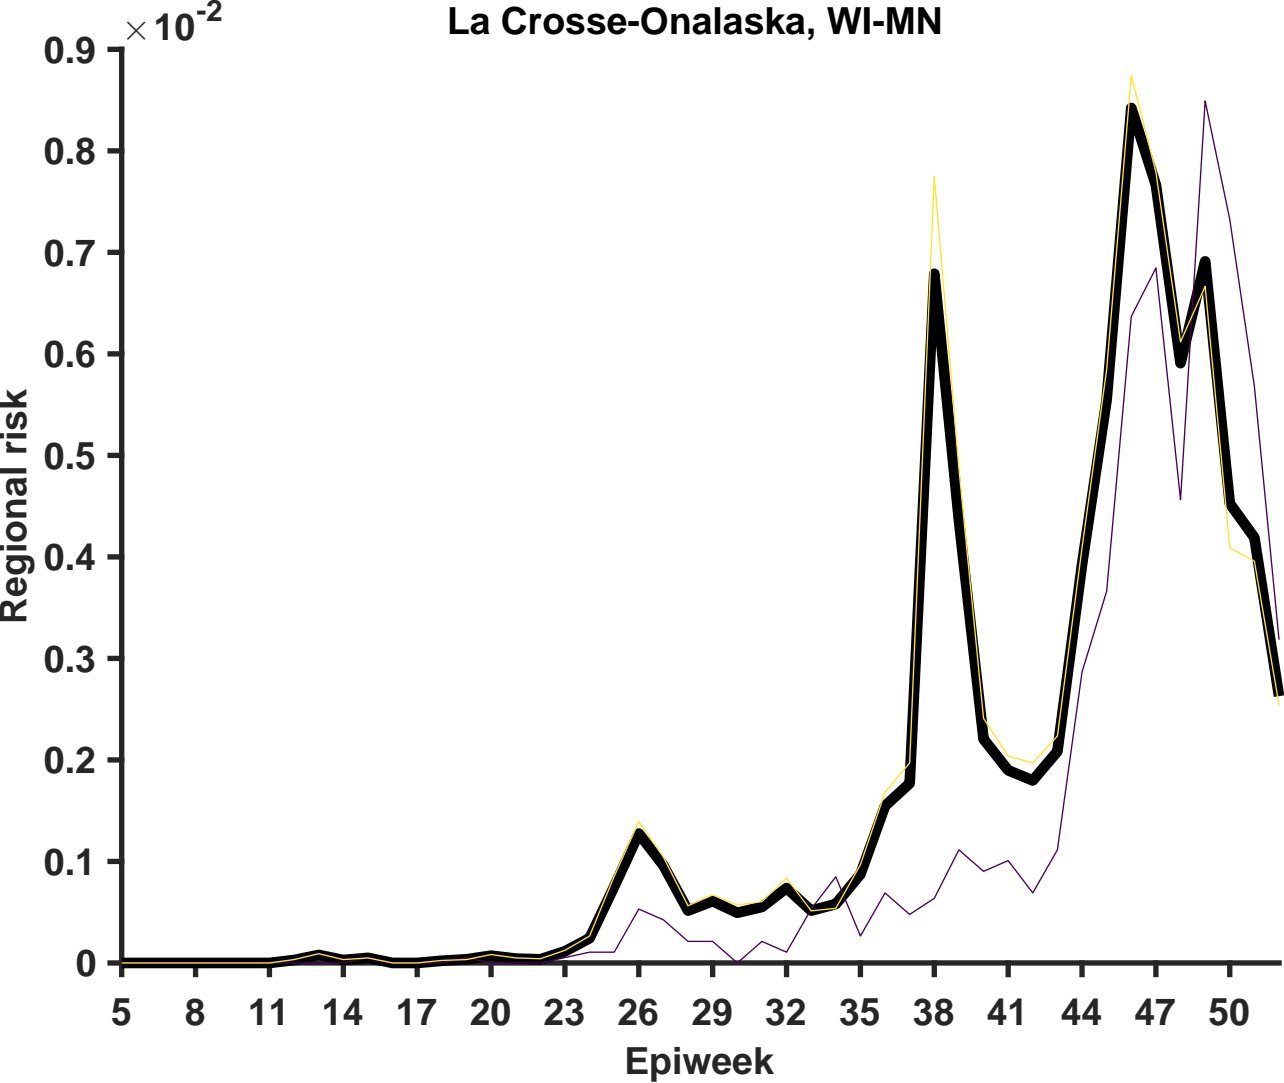

# Wheeling, WV-OH

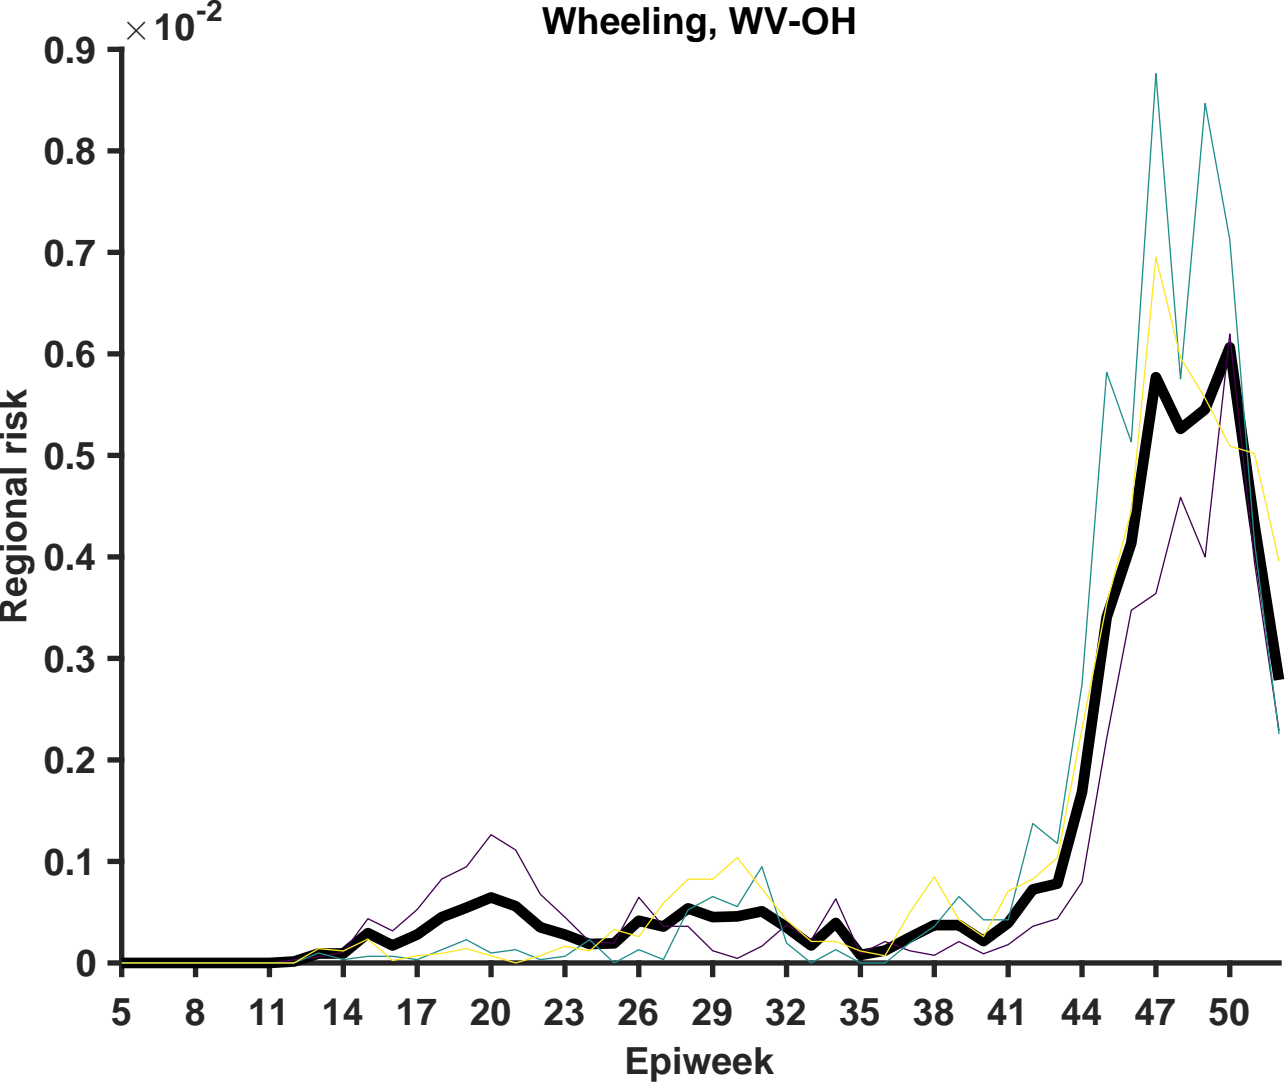

# Rapid City, SD

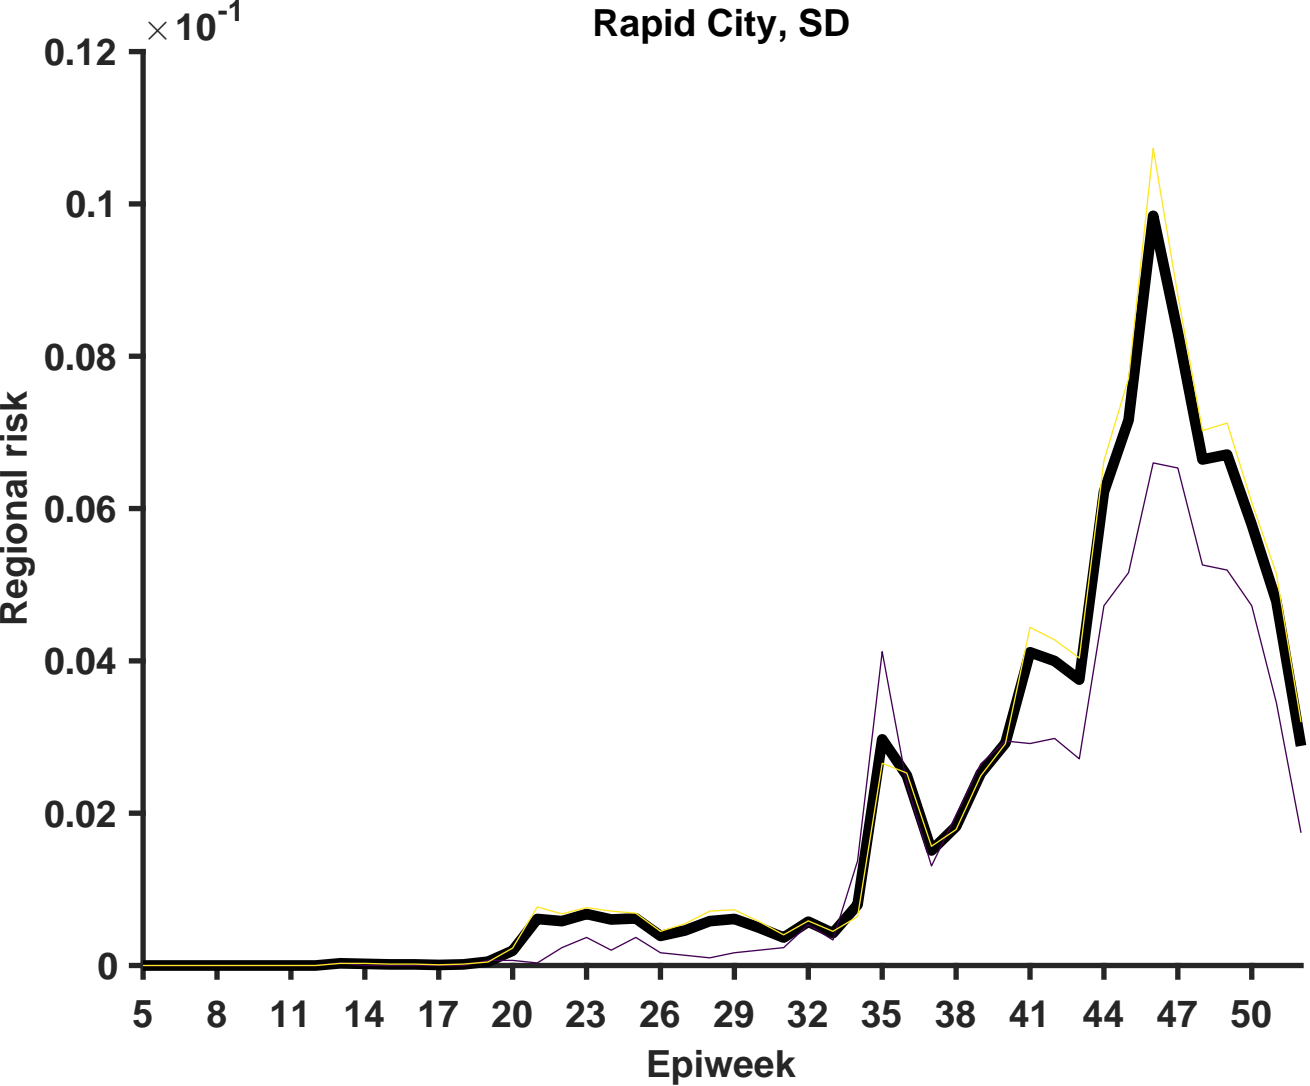

# Harrisonburg, VA

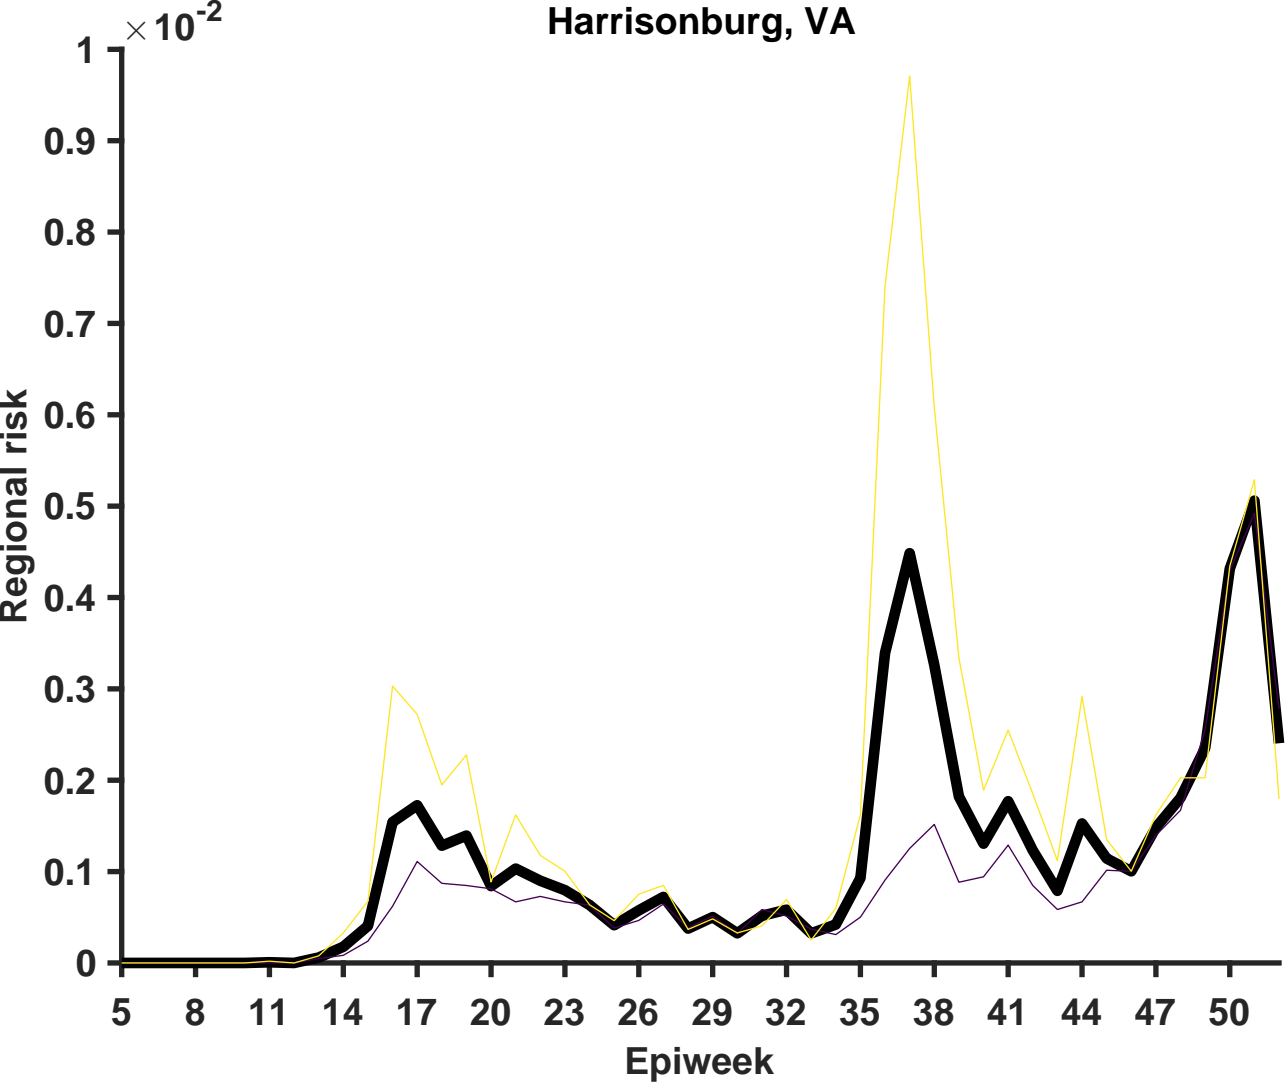

# Jonesboro, AR

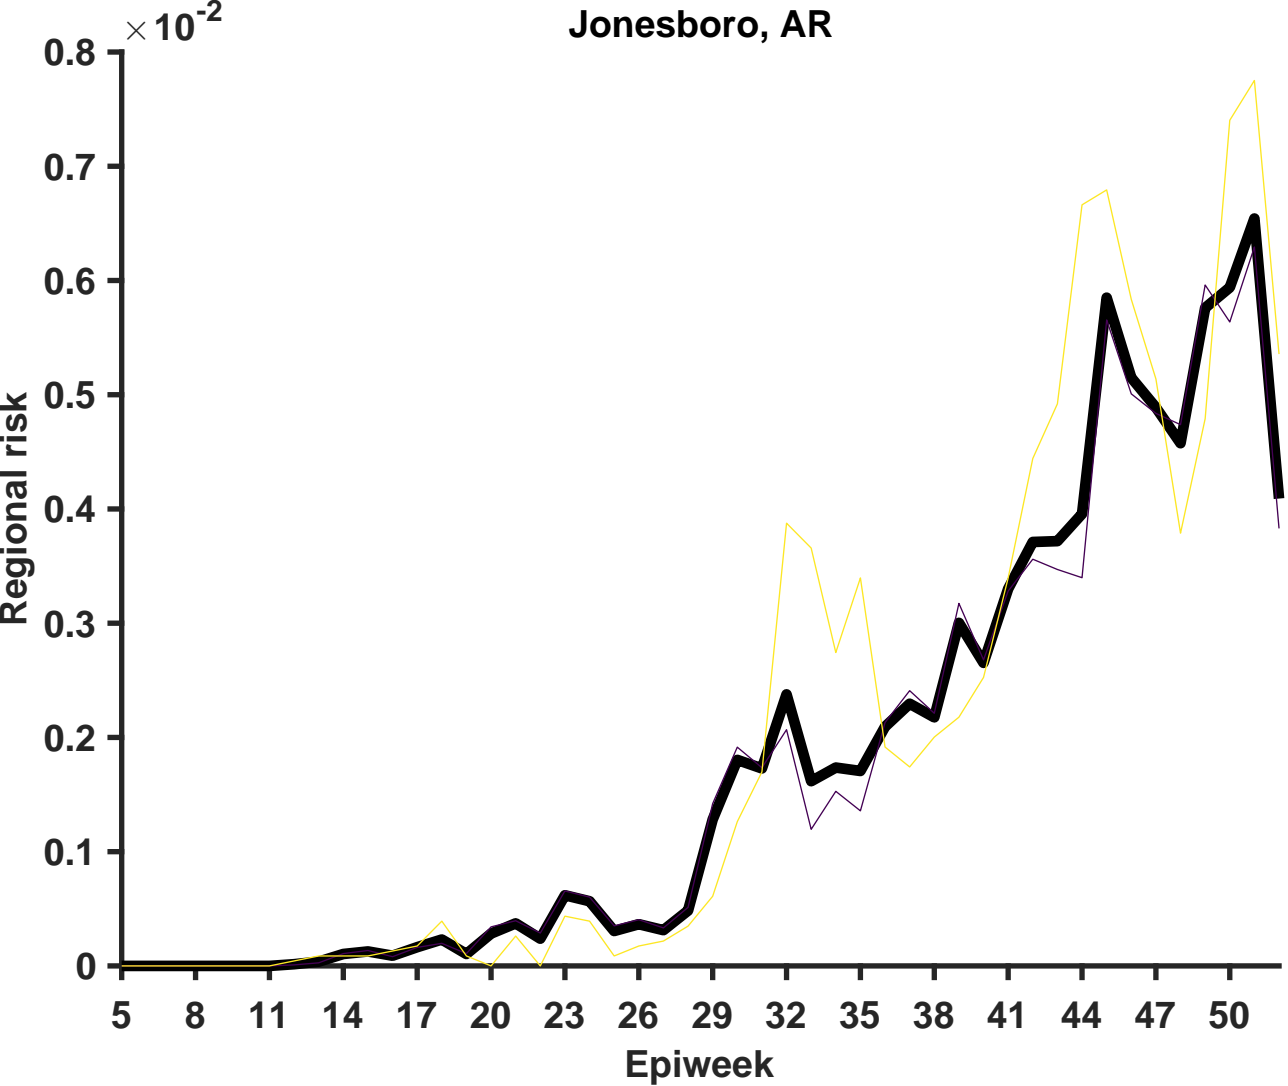



# Manhattan, KS

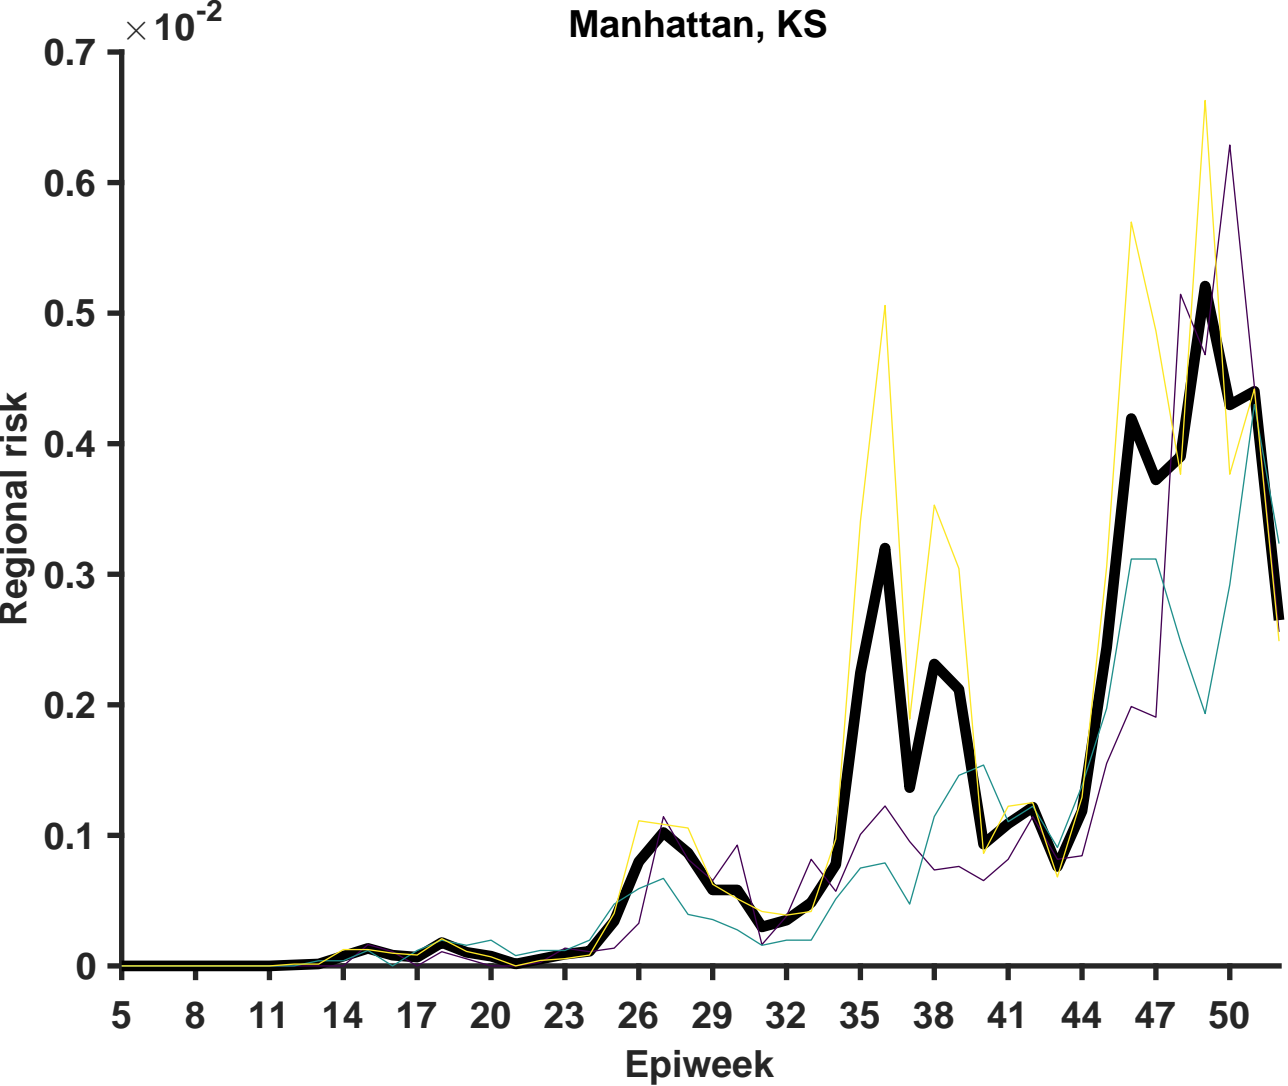

# Bismarck, ND

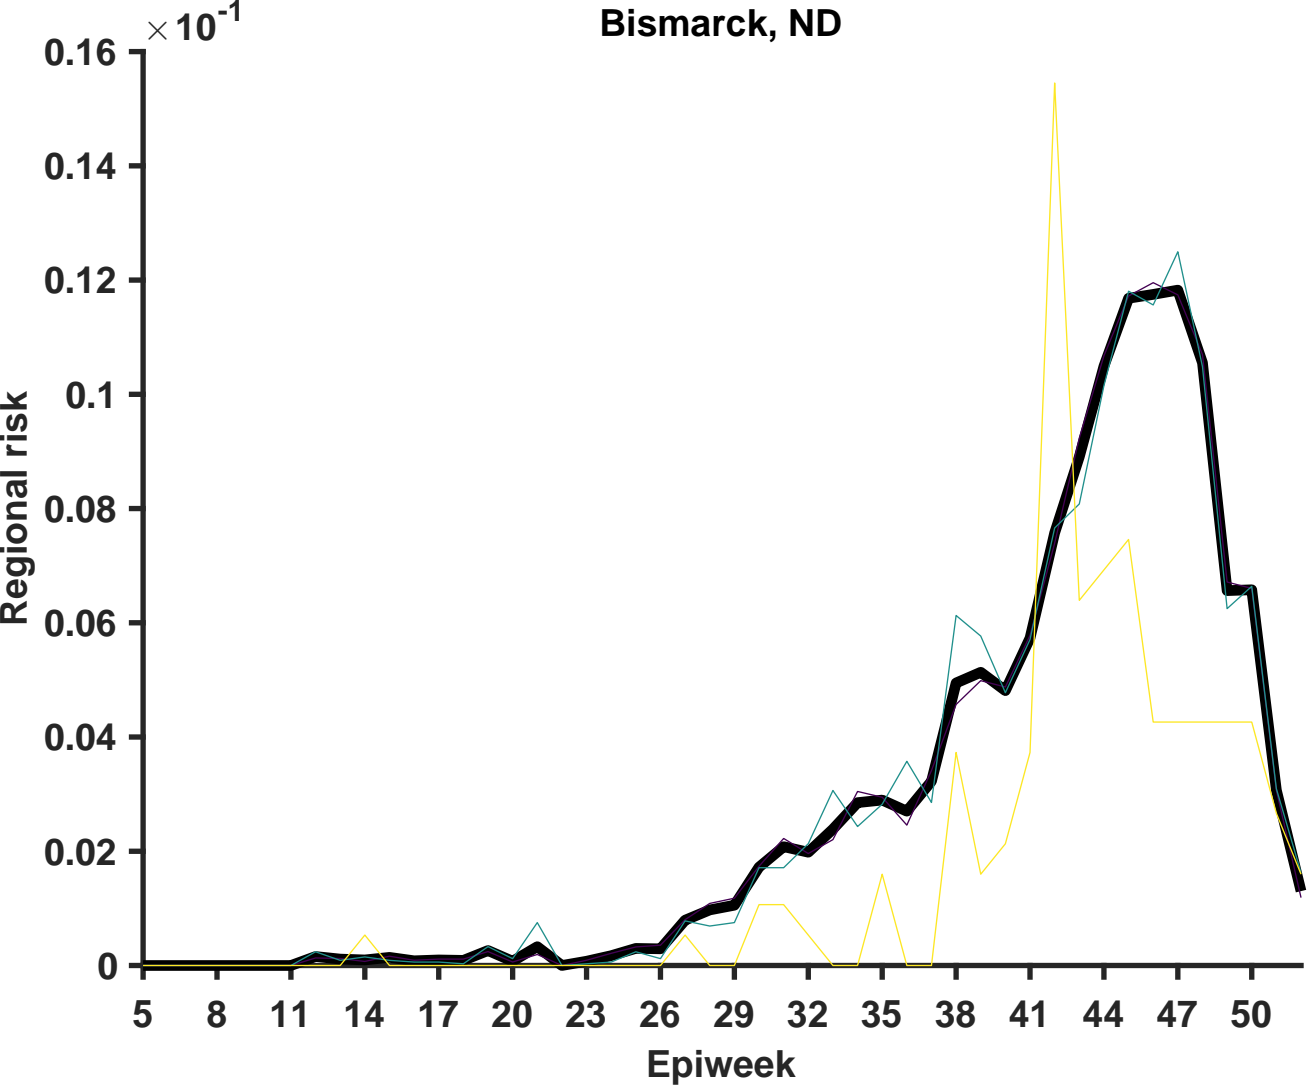

# Carbondale-Marion, IL

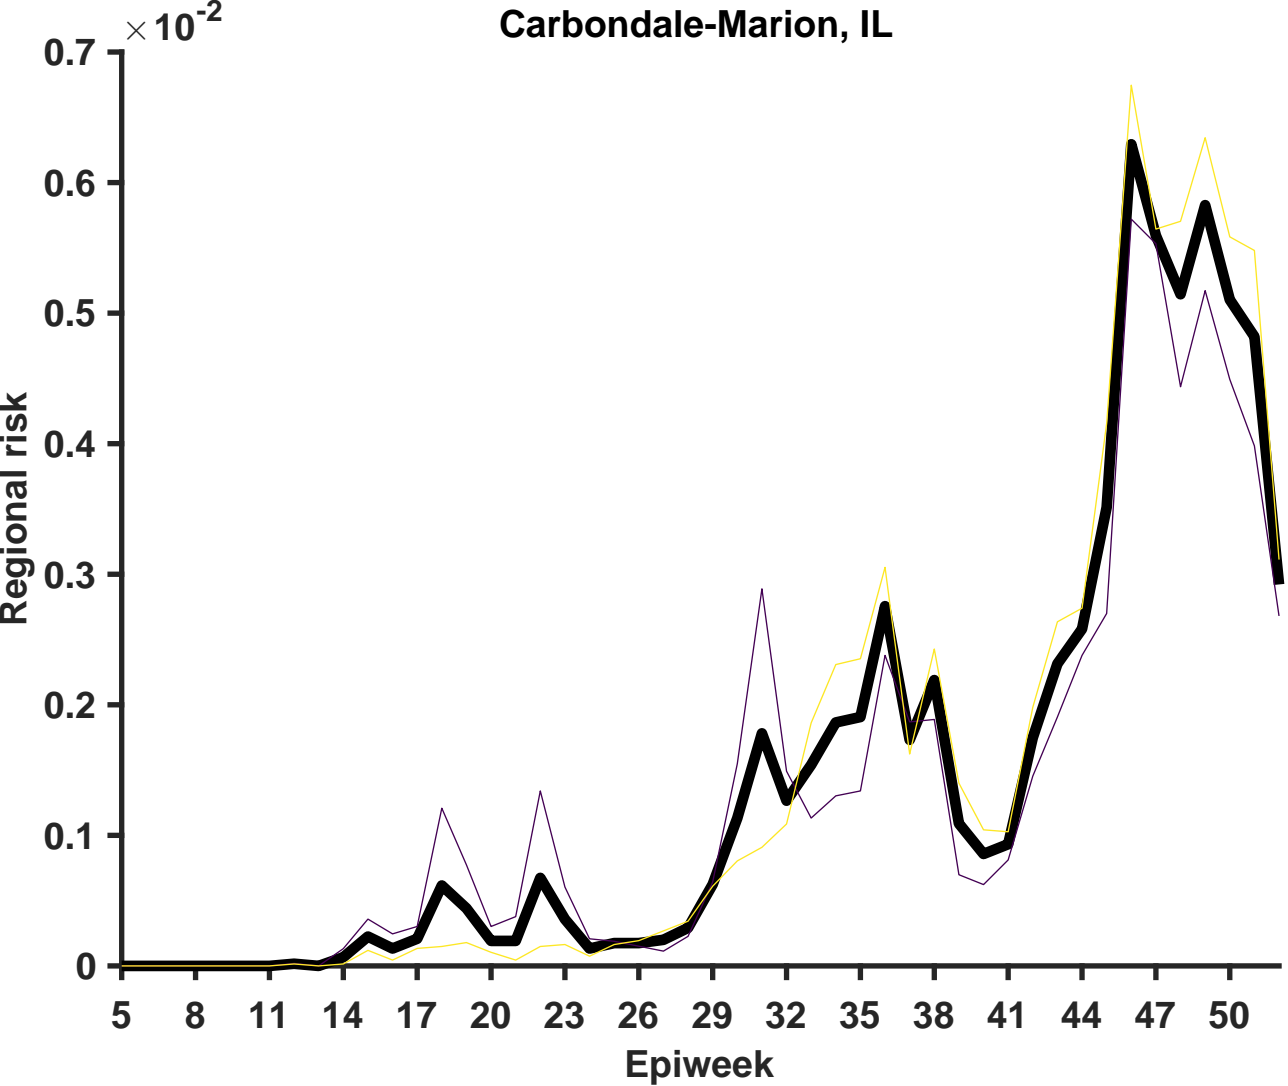

# Glens Falls, NY

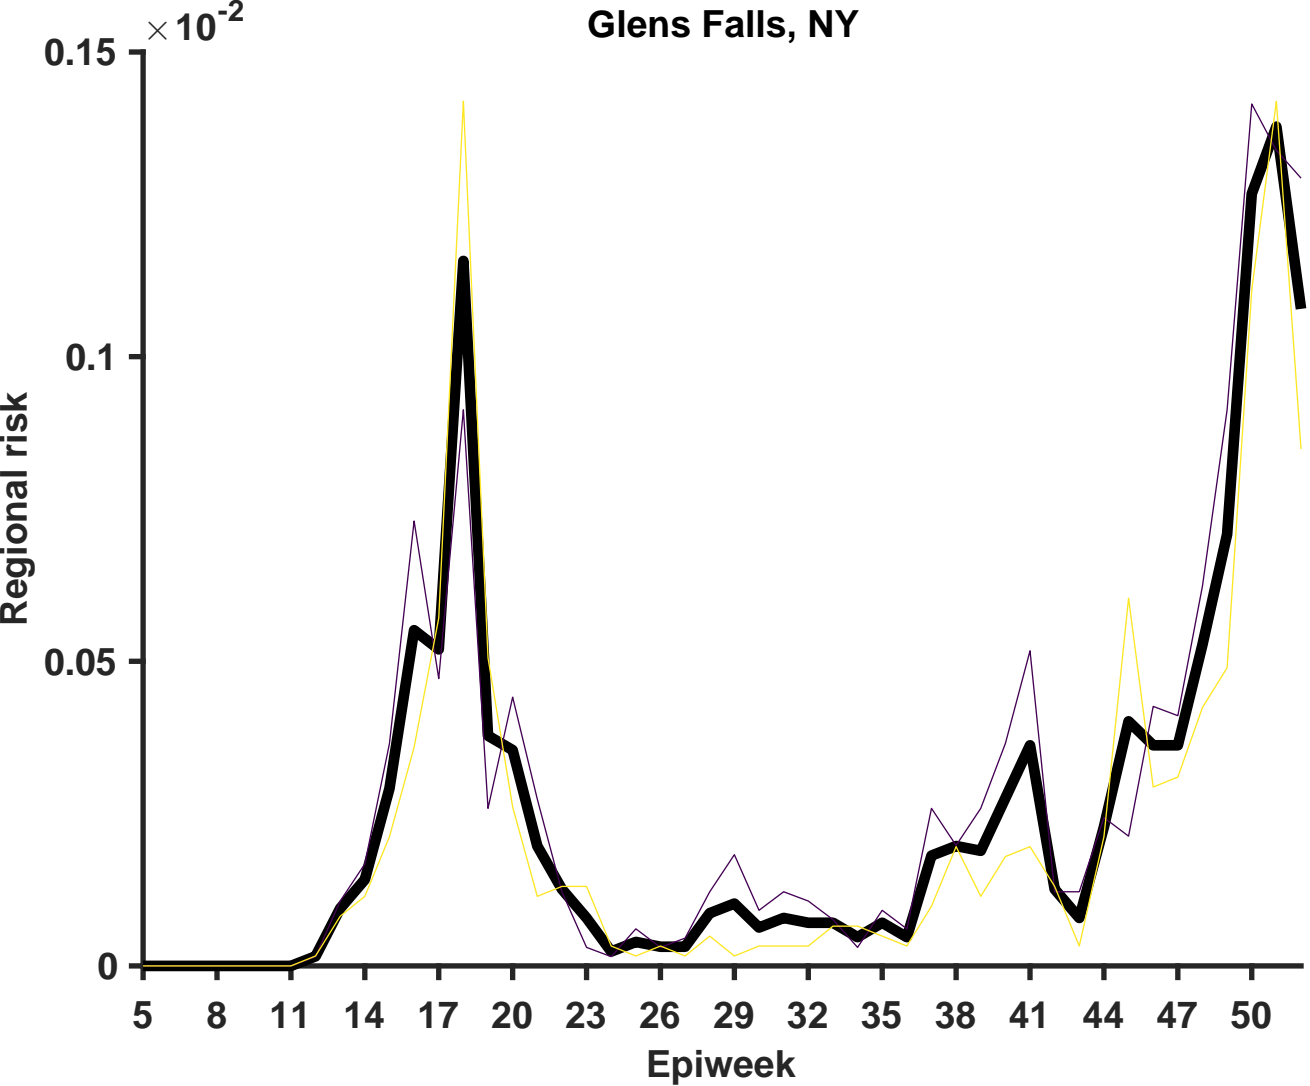

# Lawton, OK

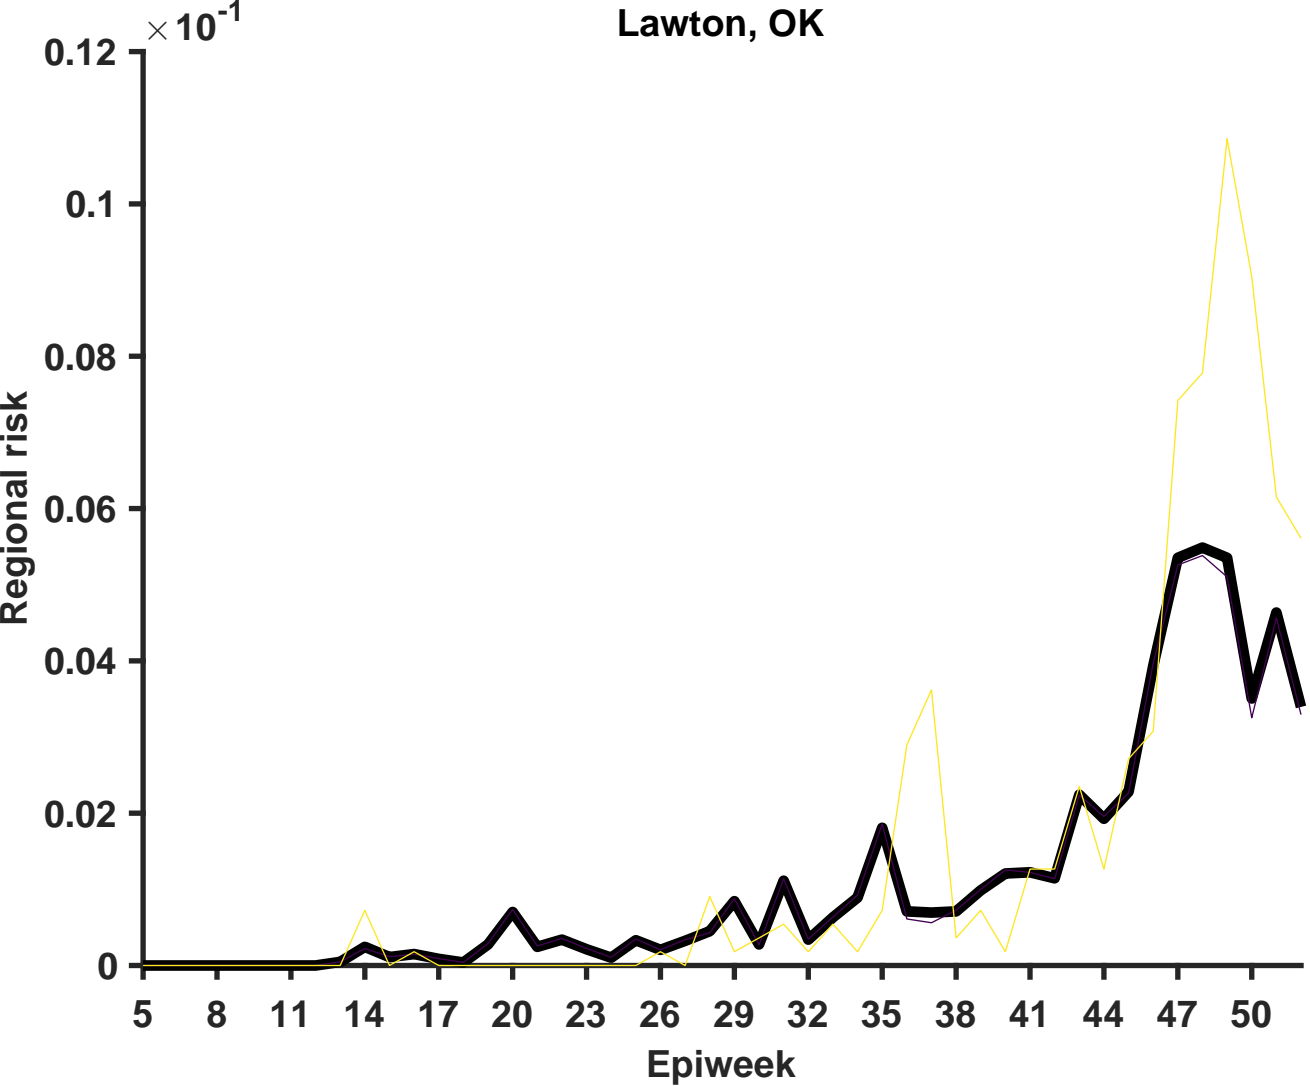

# Cleveland, TN

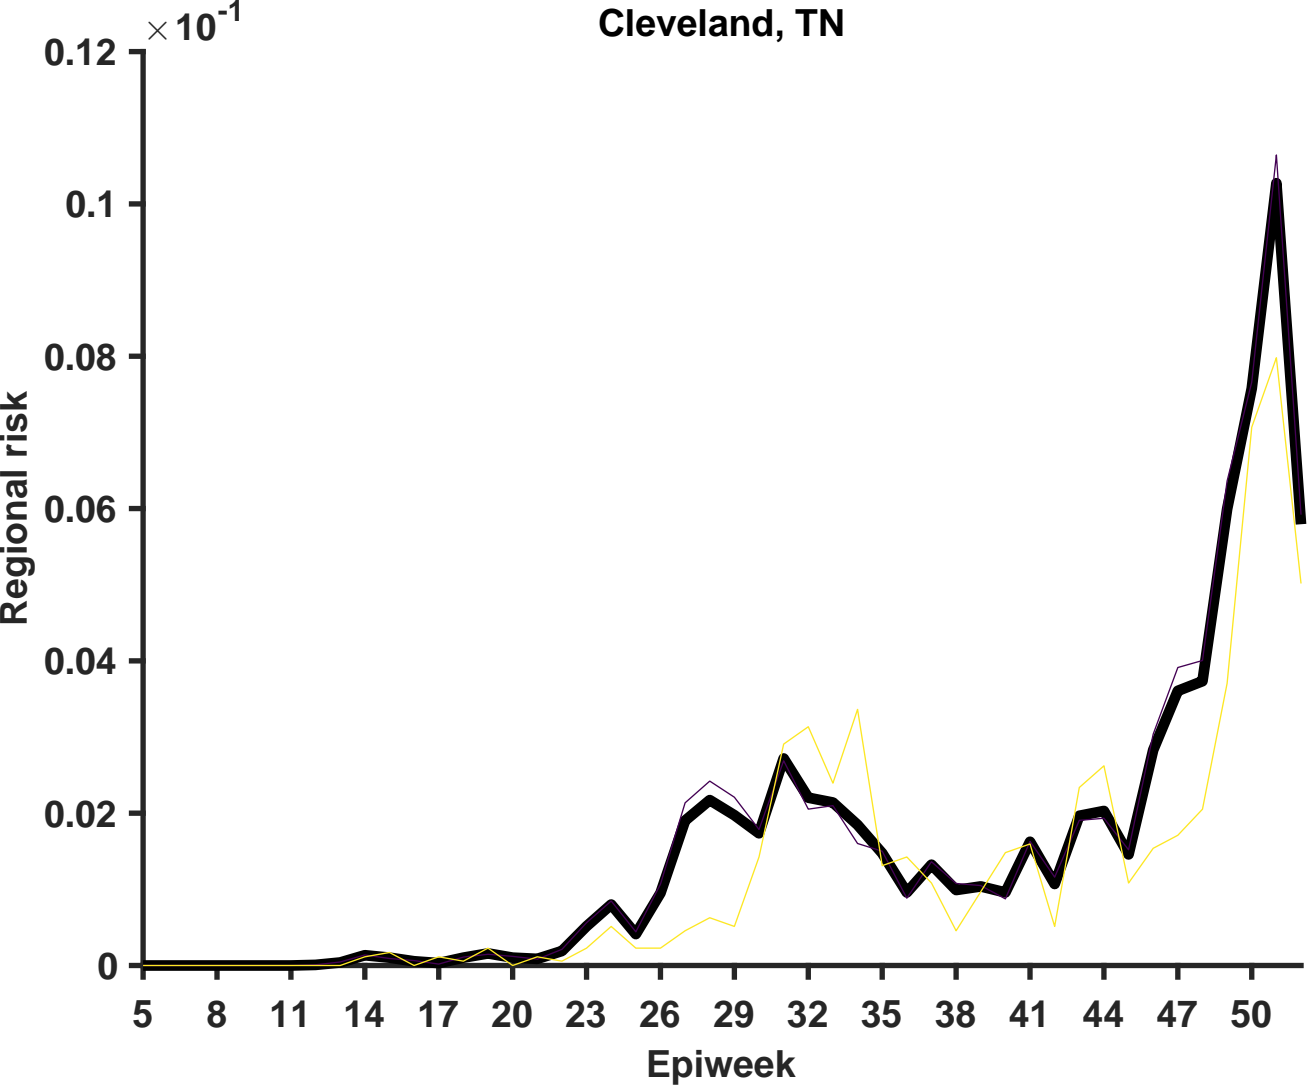

# Staunton, VA

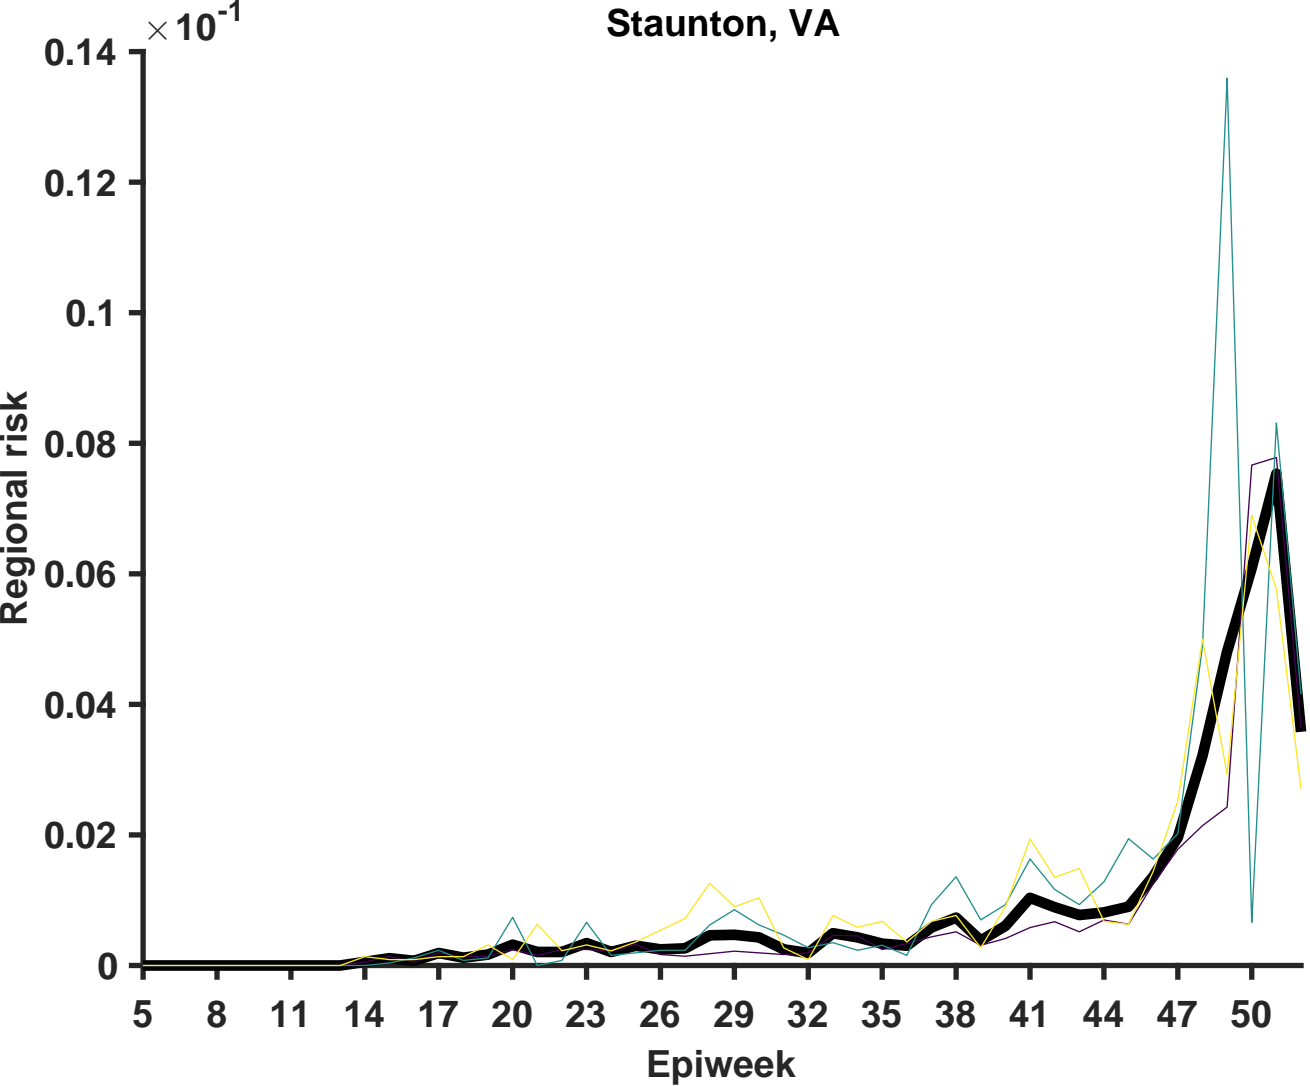

# Ames, IA

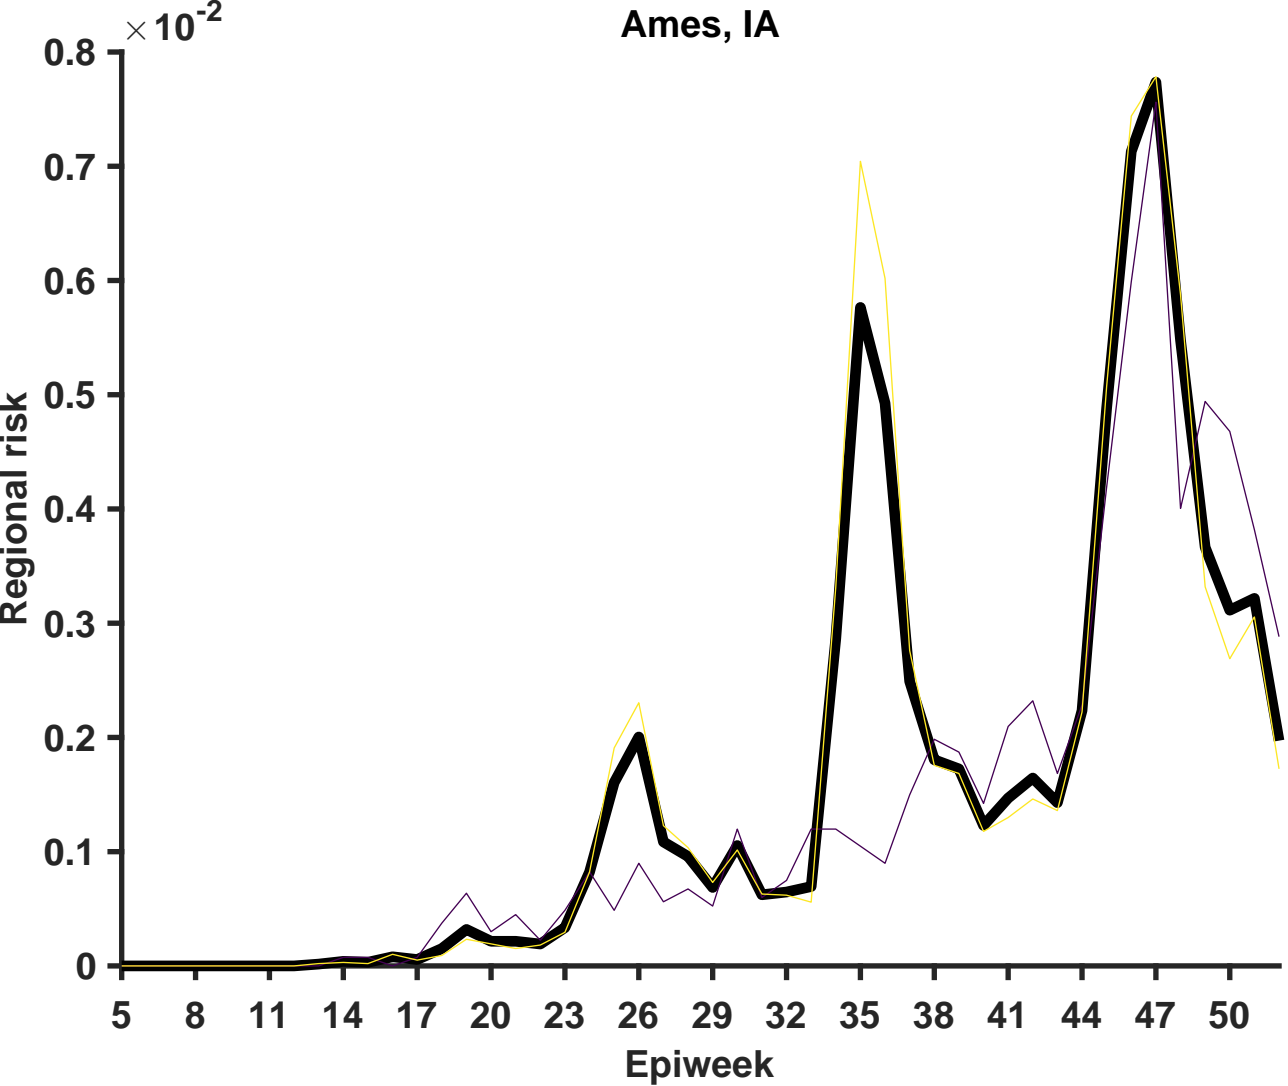



# San Angelo, TX

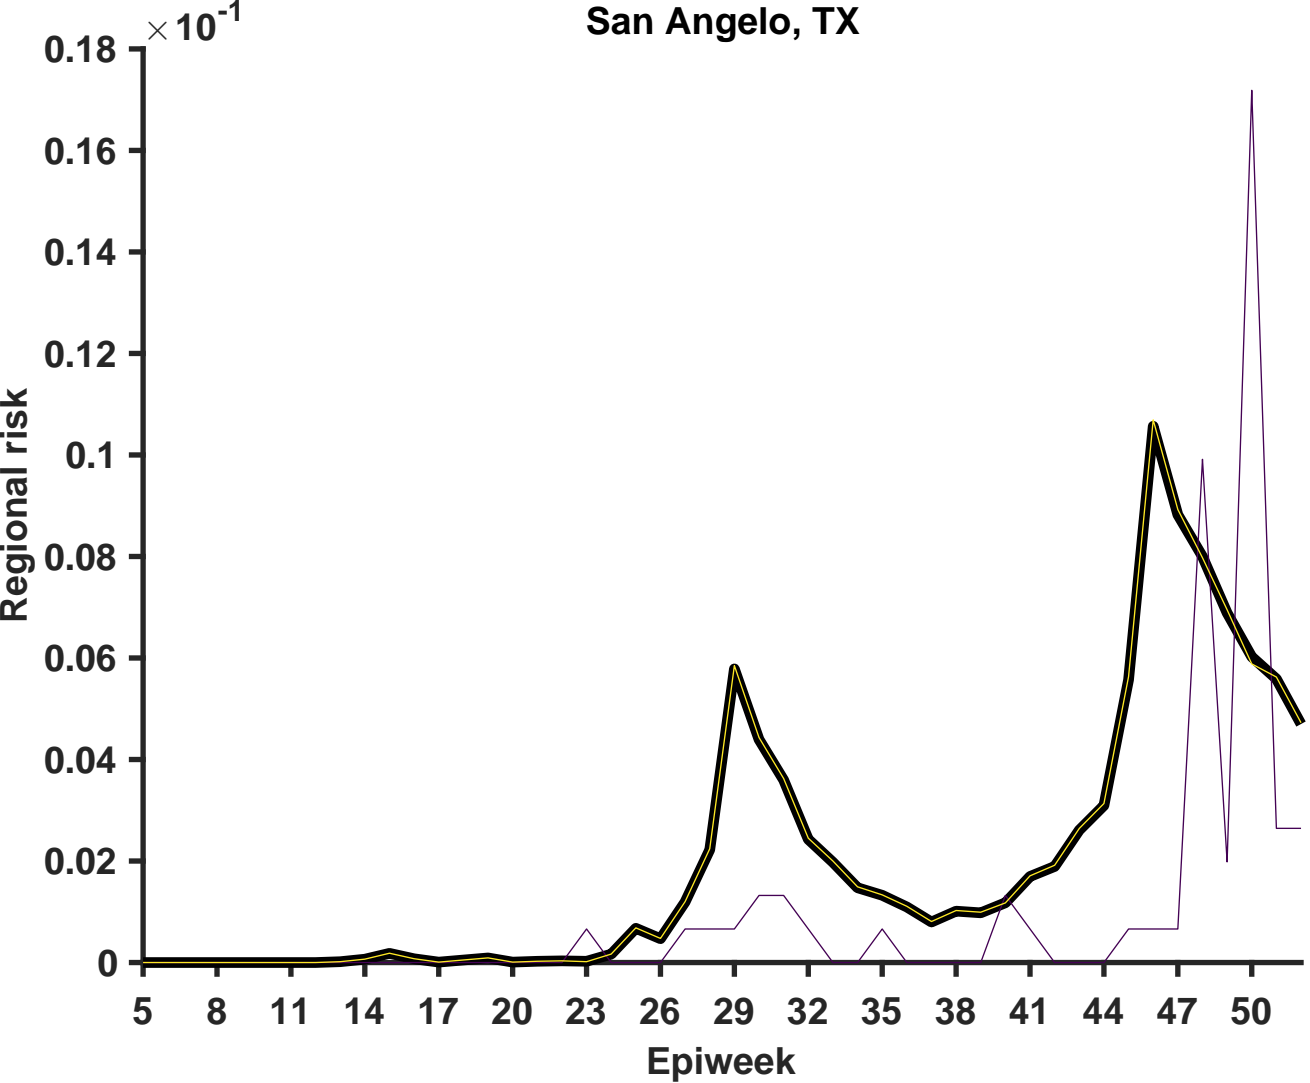

# New Bern, NC

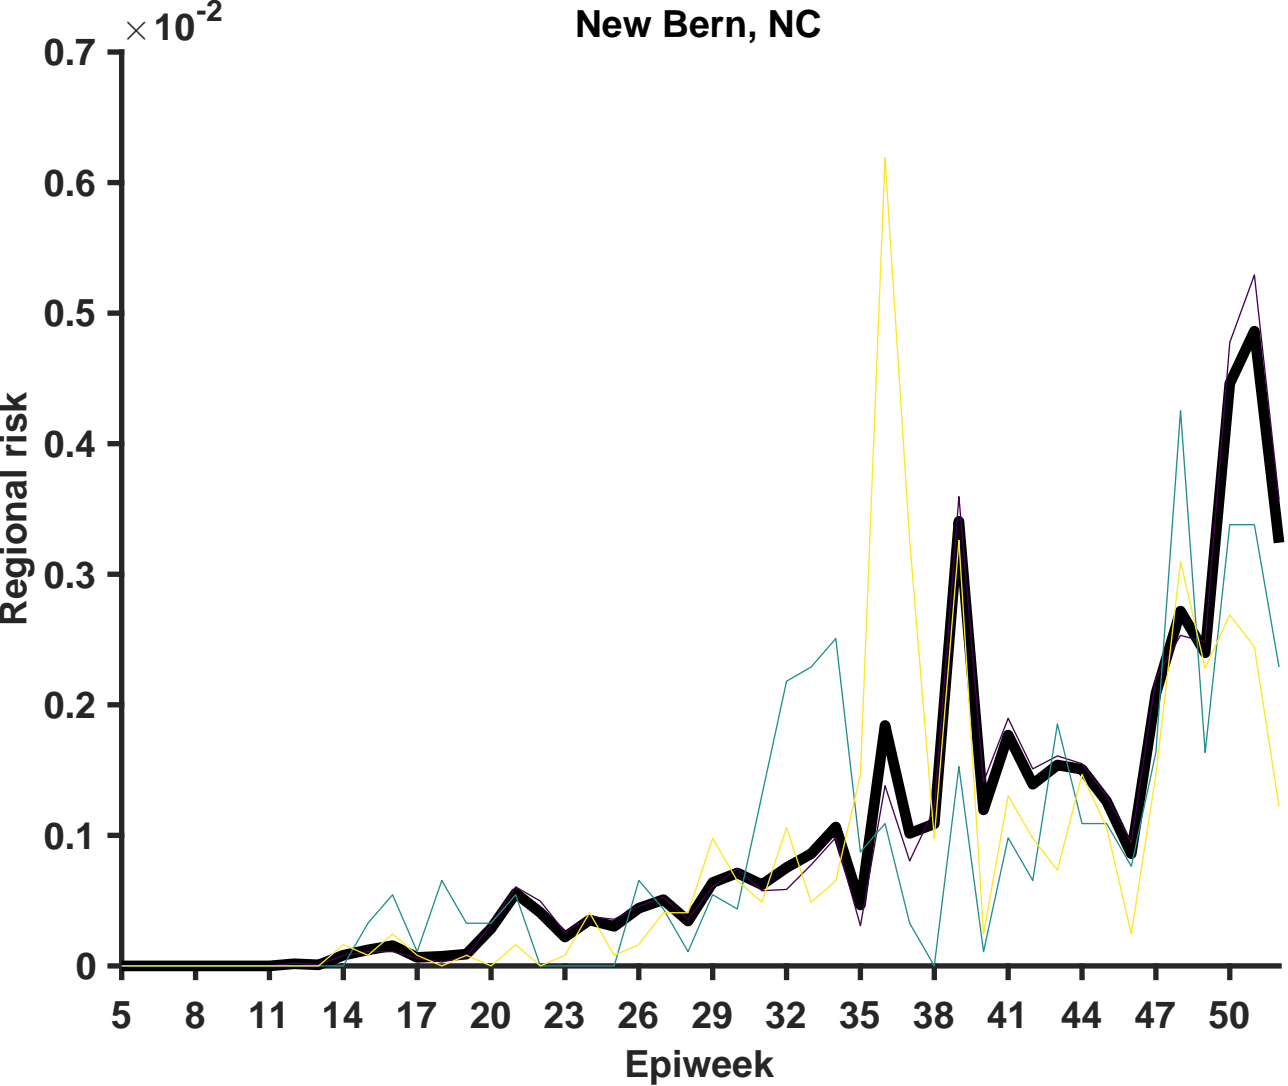

# Wenatchee, WA

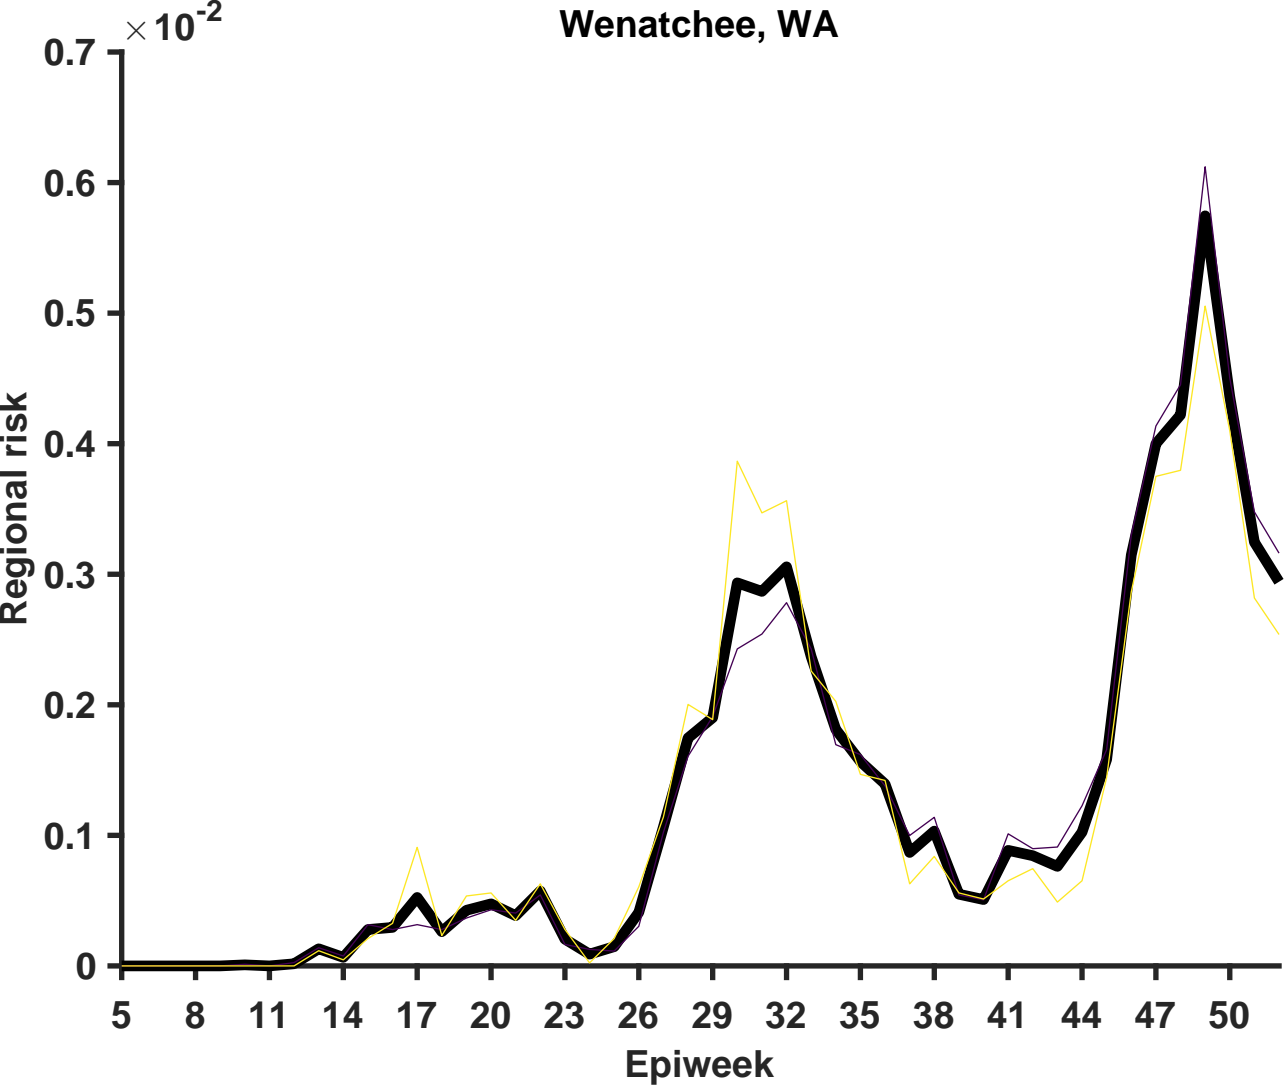

# Owensboro, KY

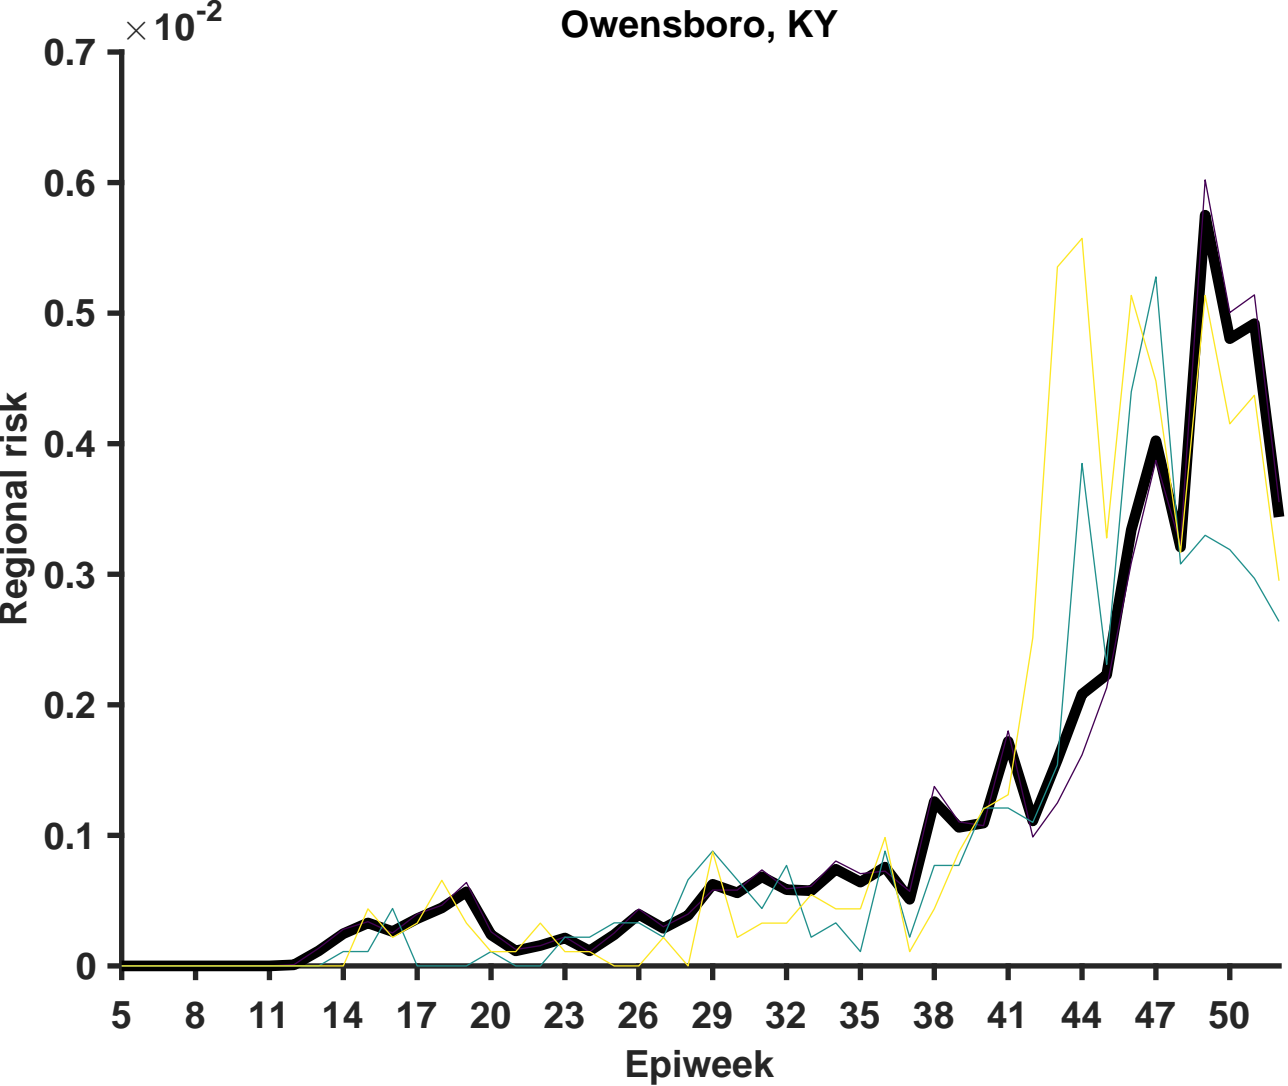

# St. Joseph, MO-KS

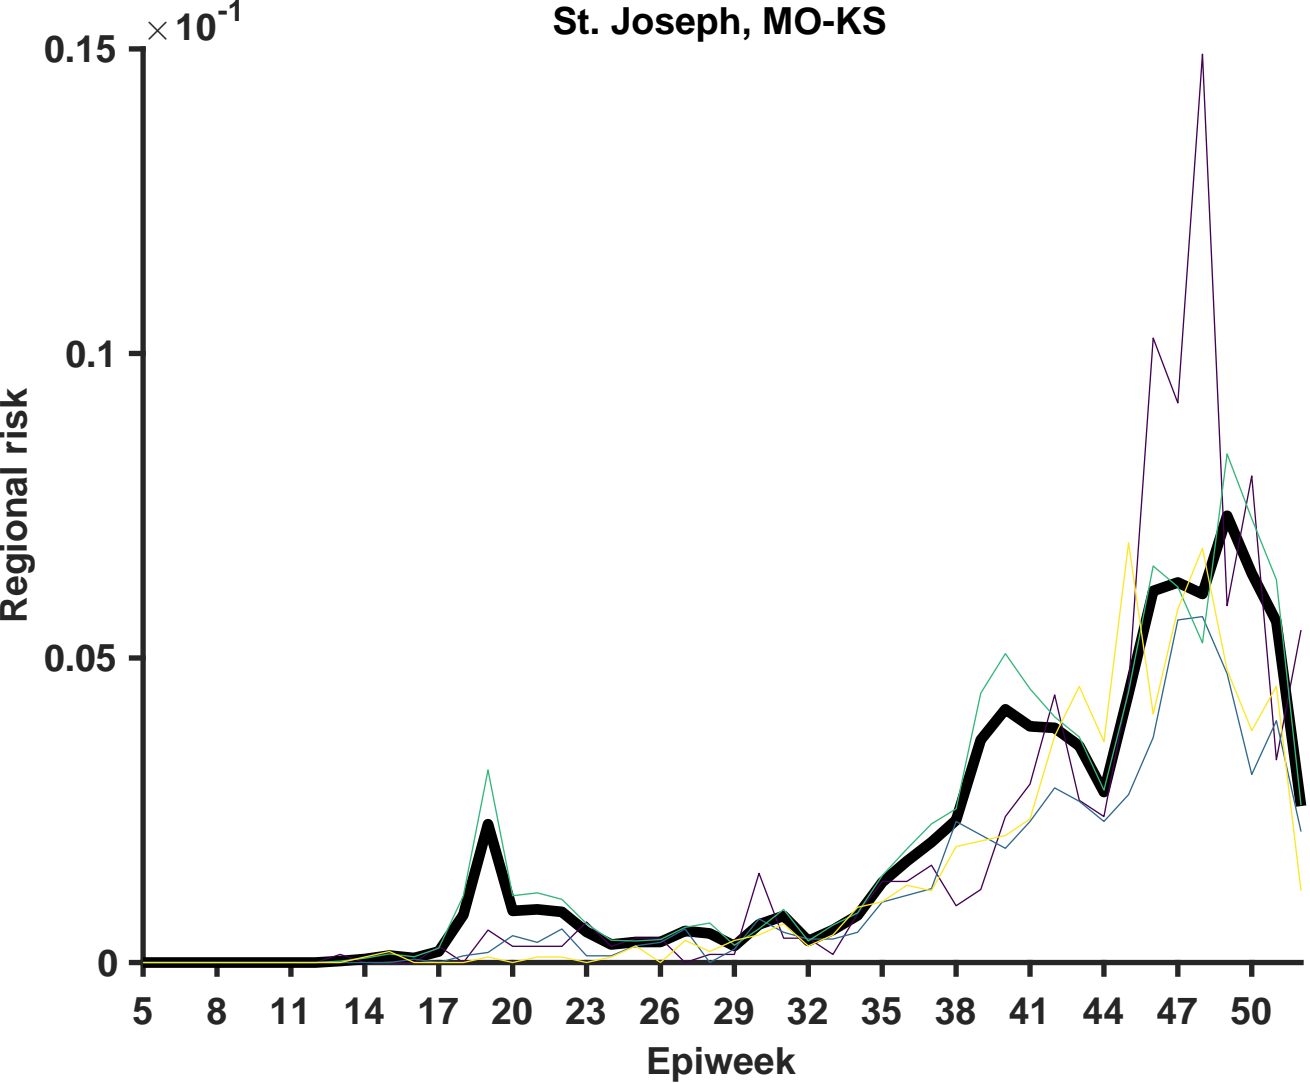

# Weirton-Steubenville, WV-OH

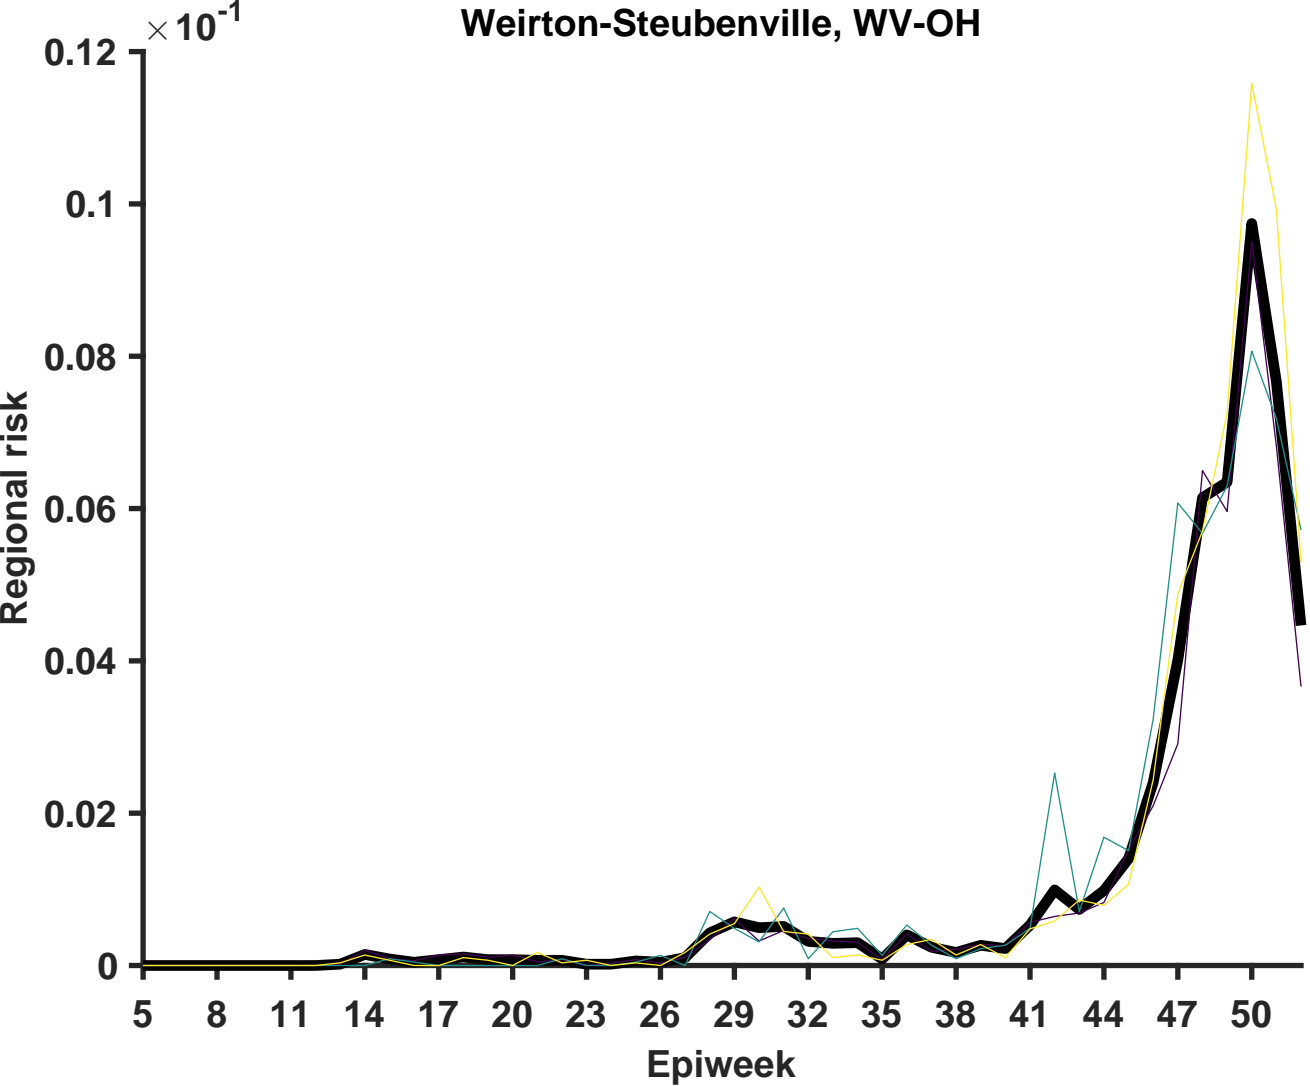

# Twin Falls, ID

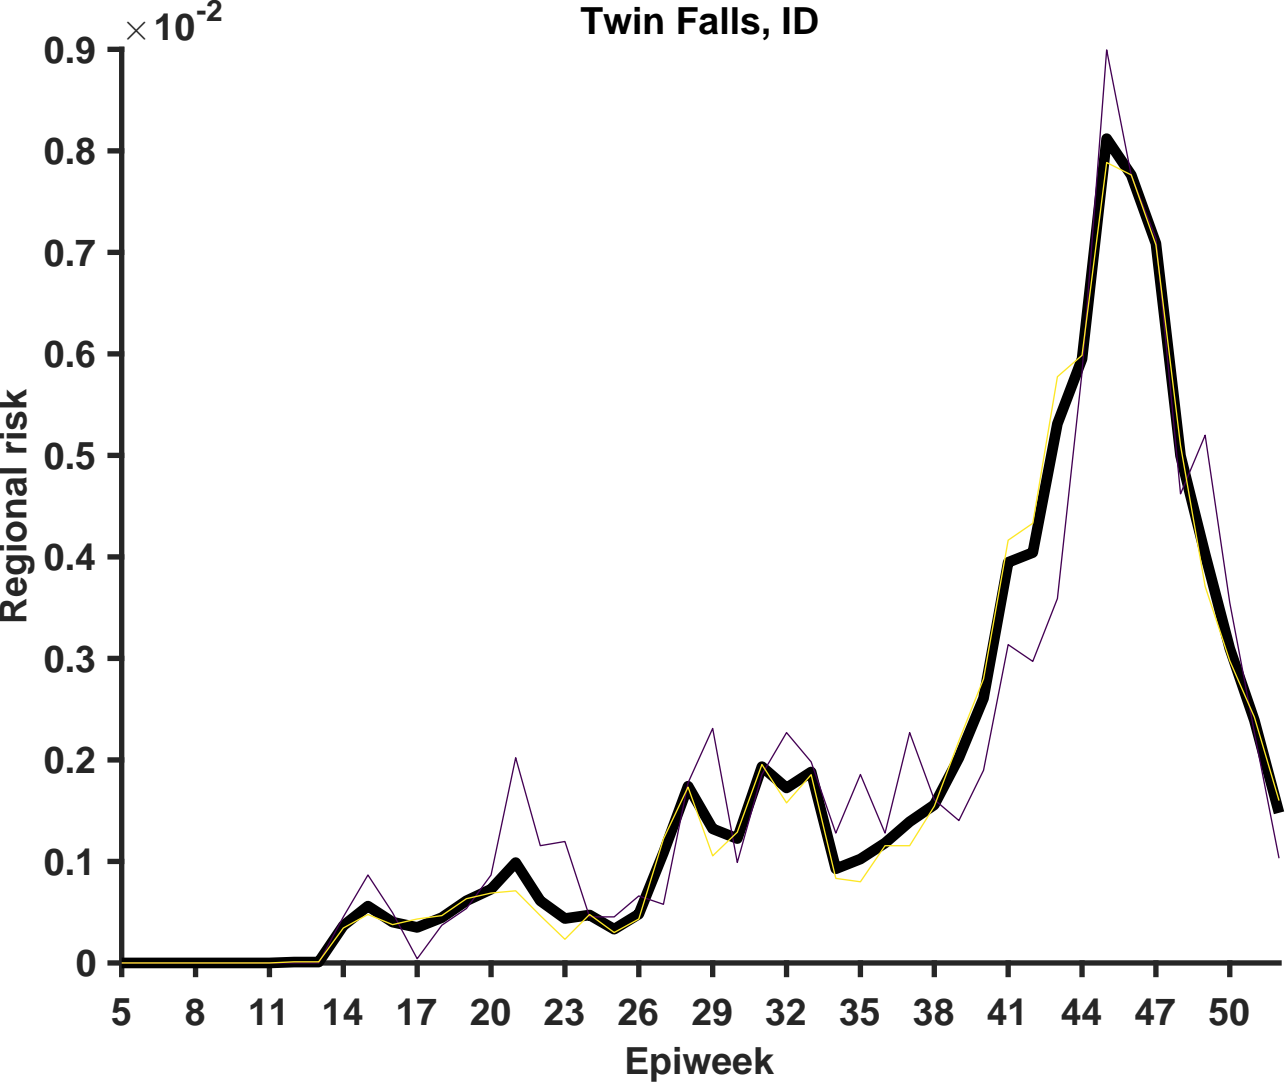

# Brunswick, GA

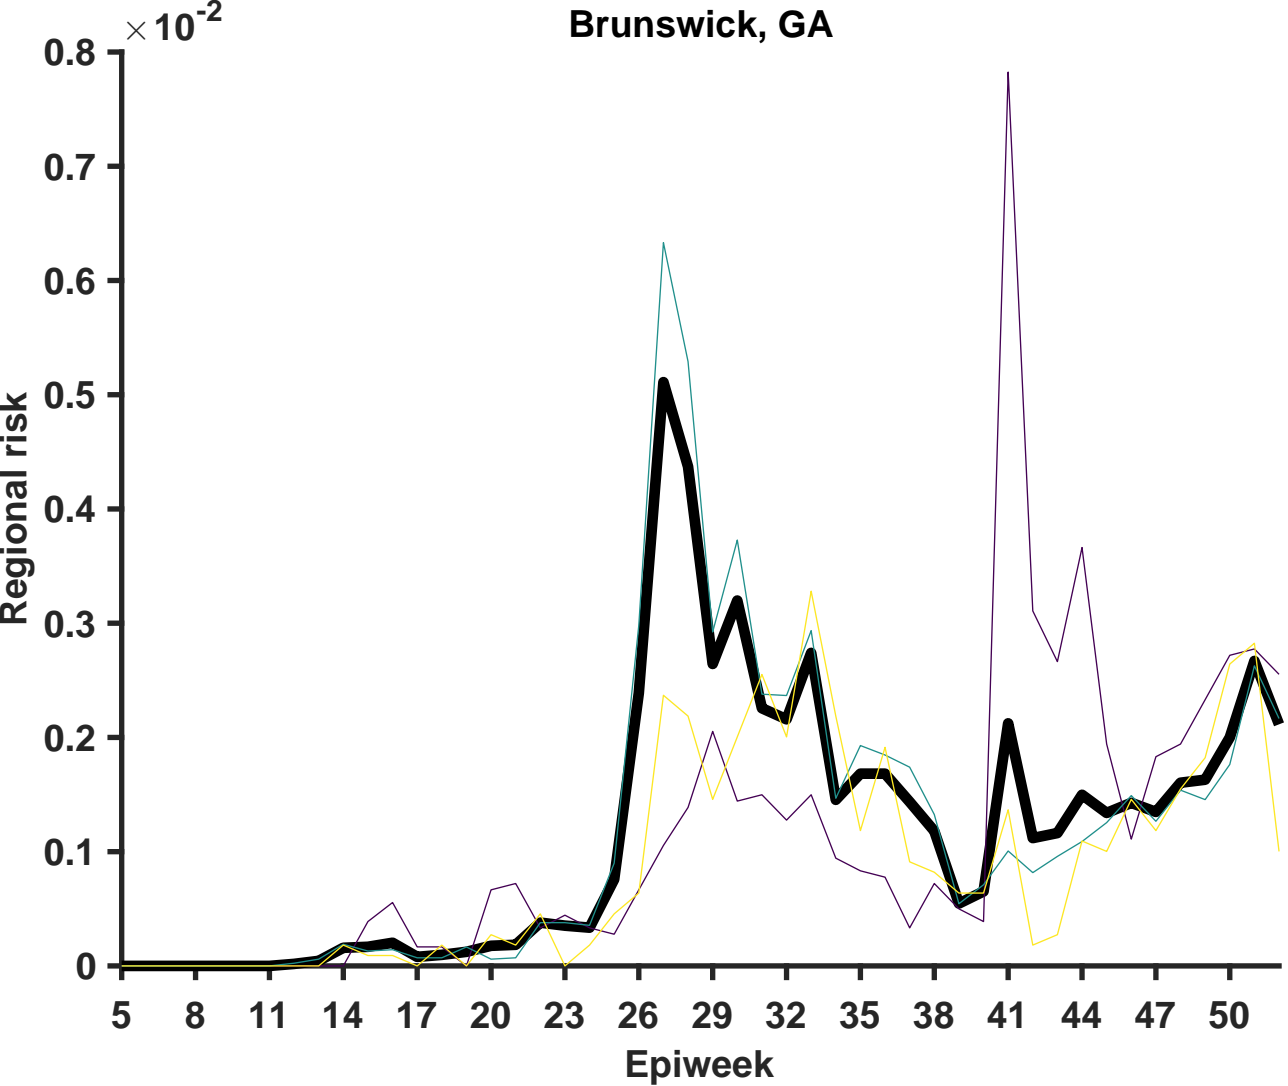



# Grand Forks, ND-MN

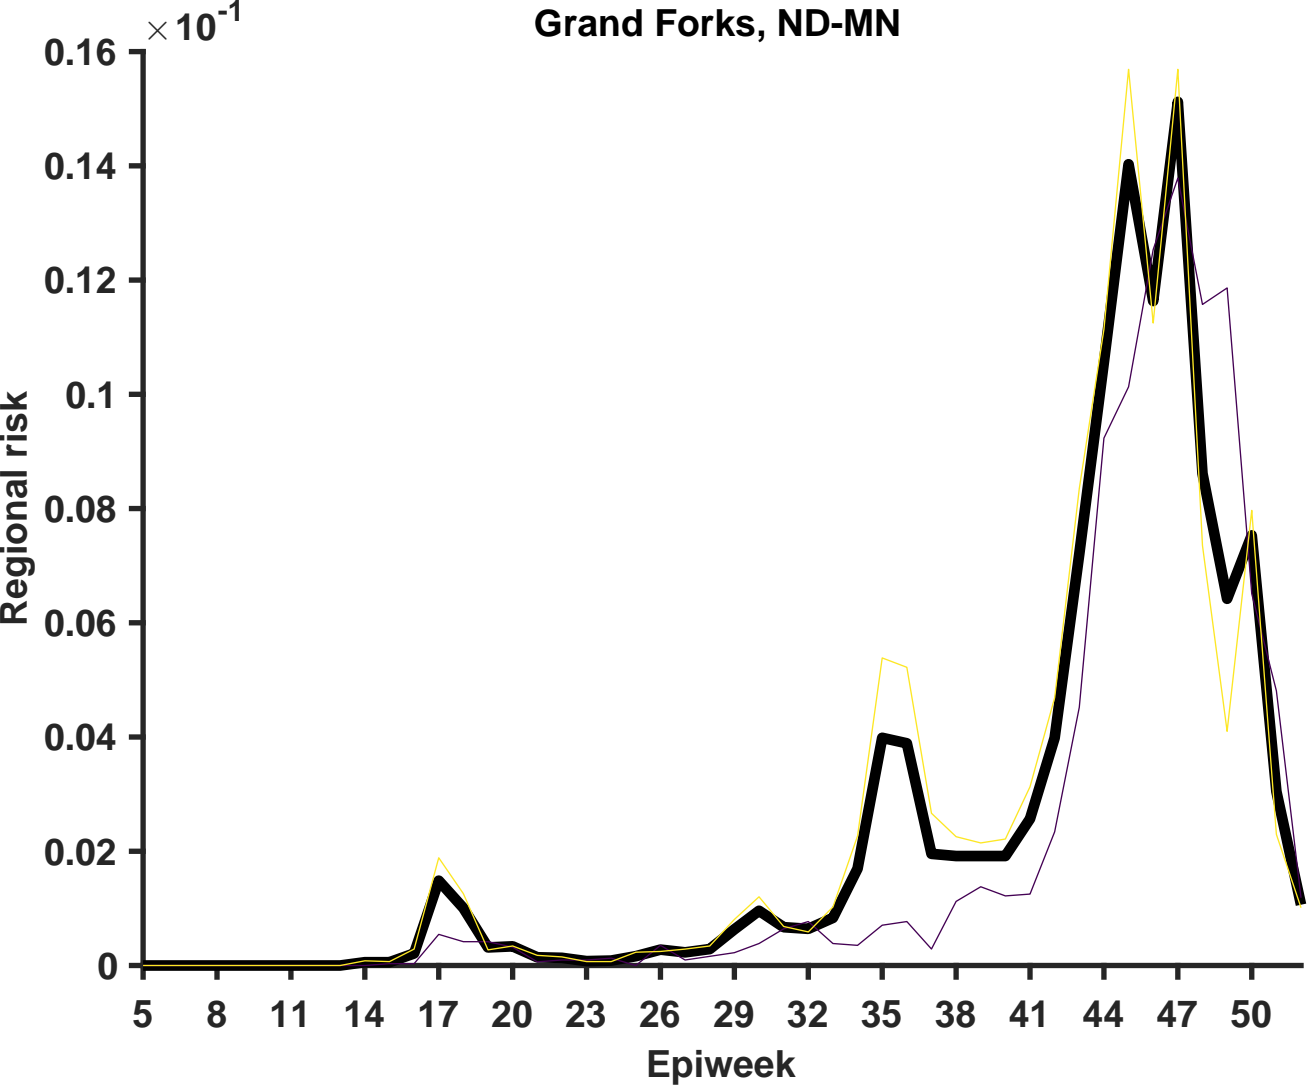

# Mankato, MN

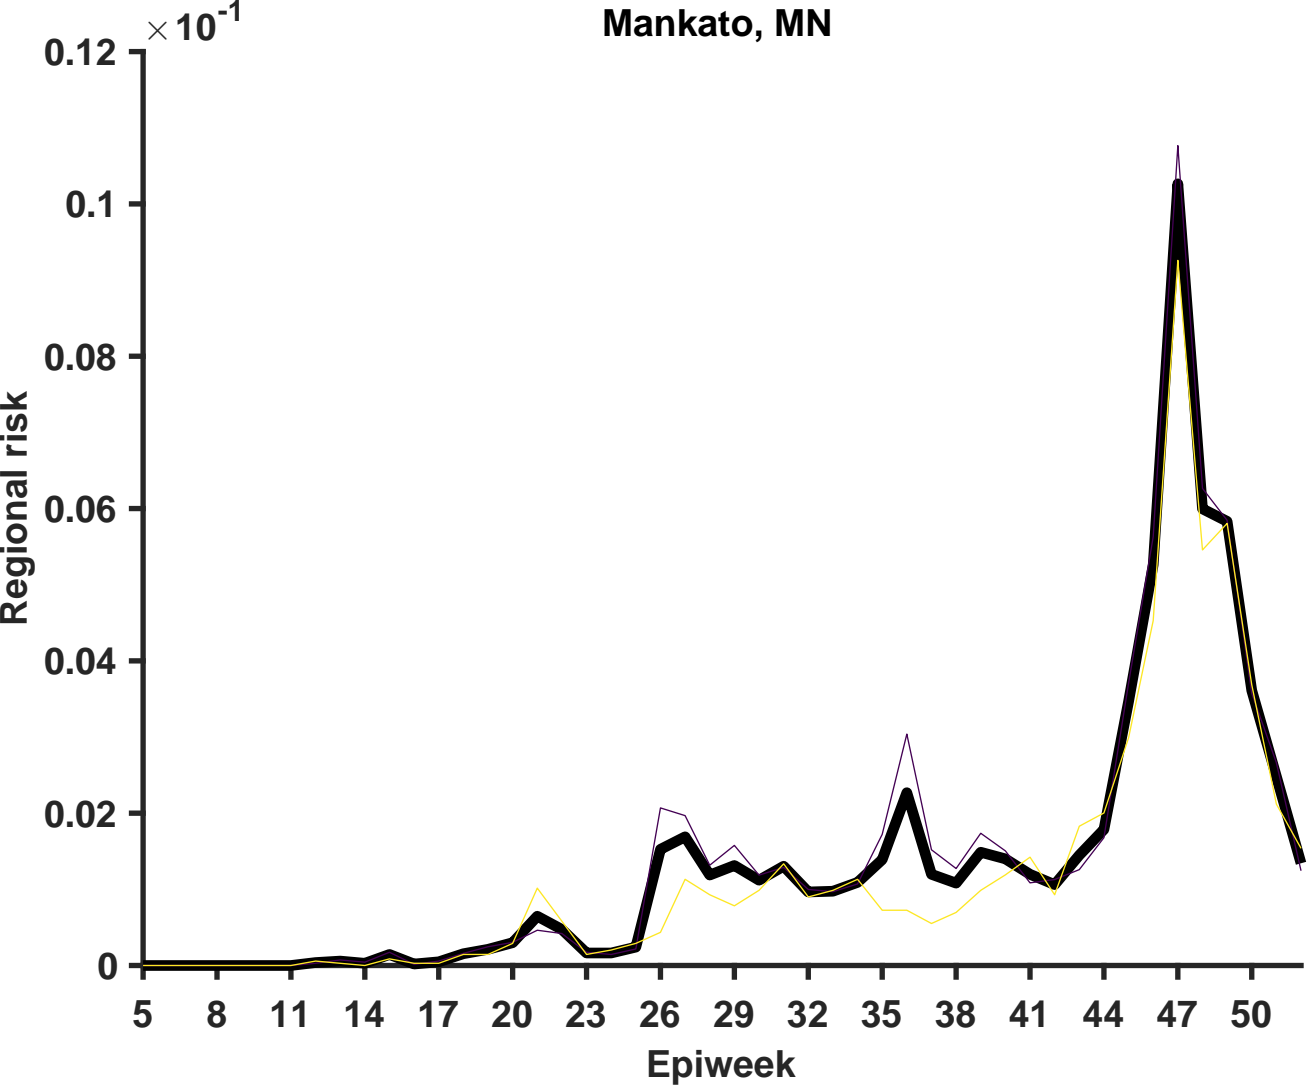

# Victoria, TX

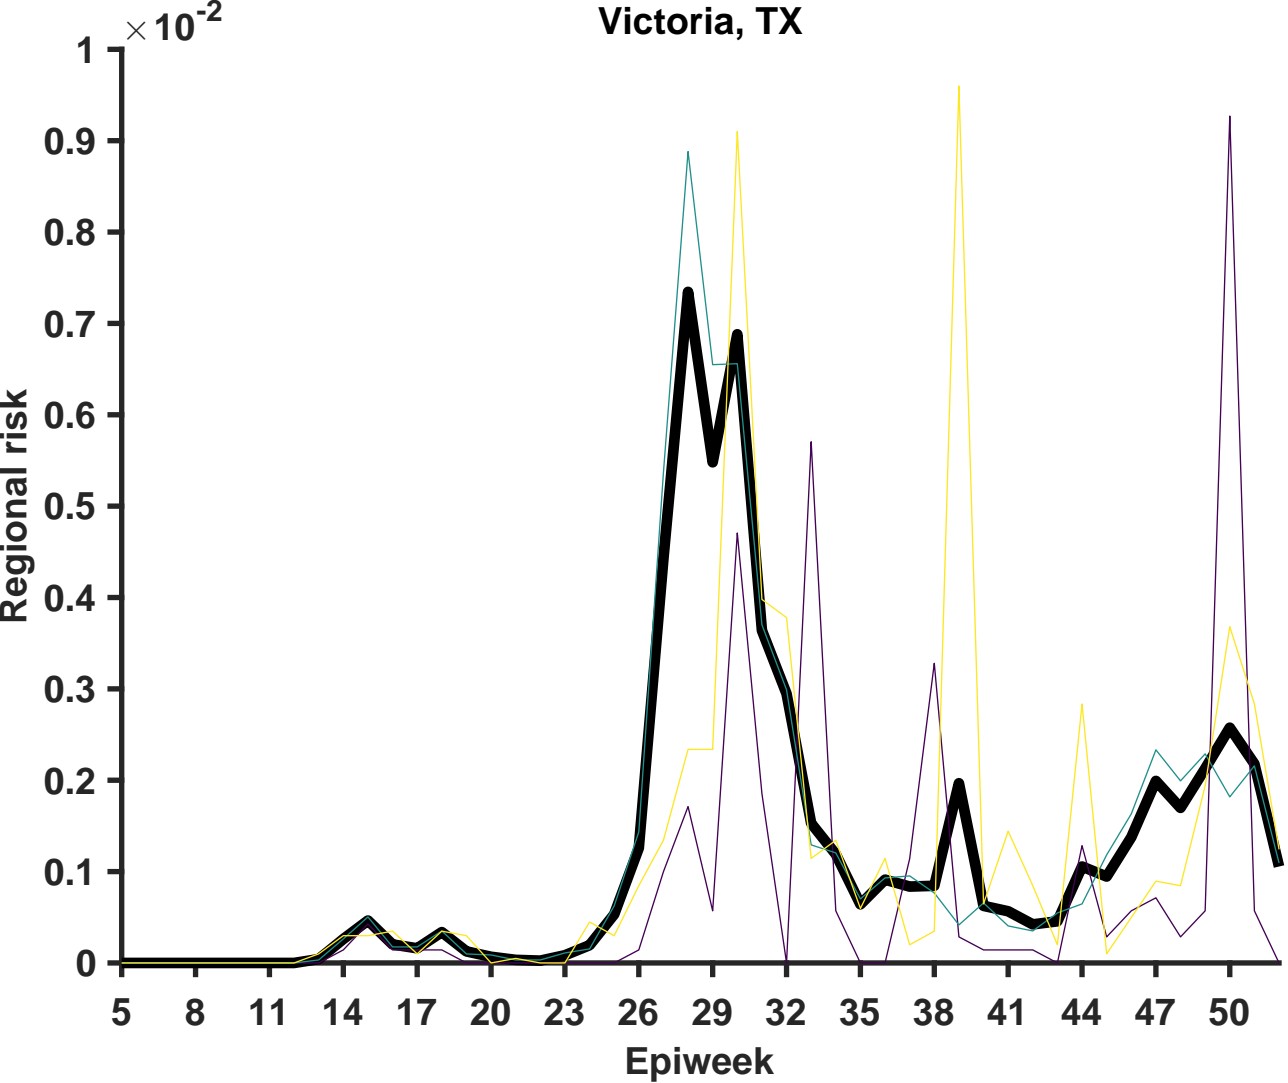

# Cape Girardeau, MO-IL

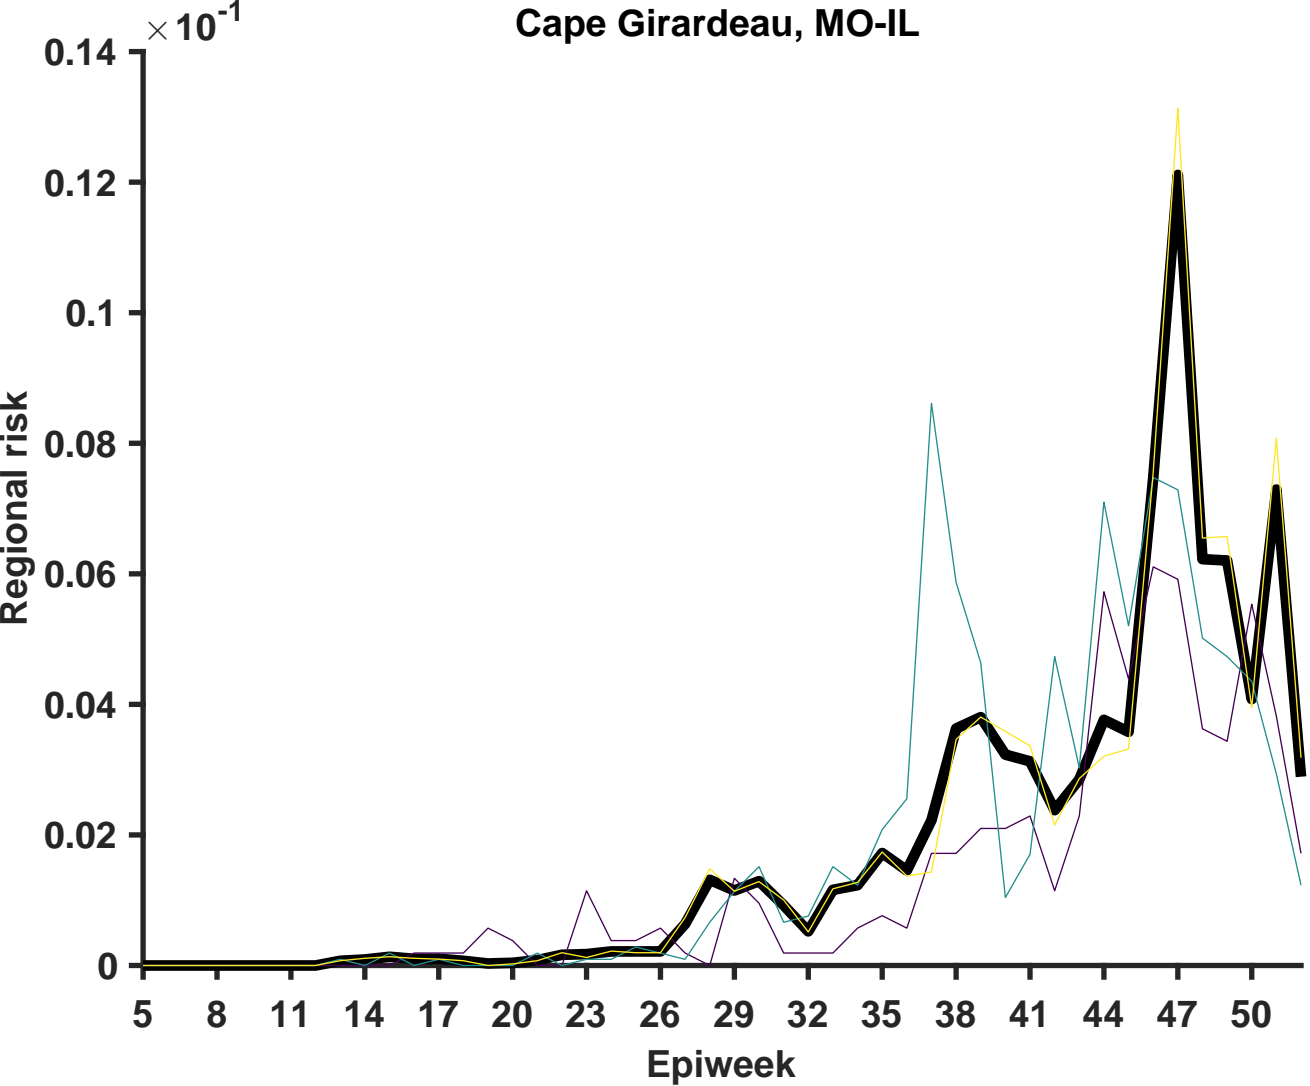

# Cumberland, MD-WV

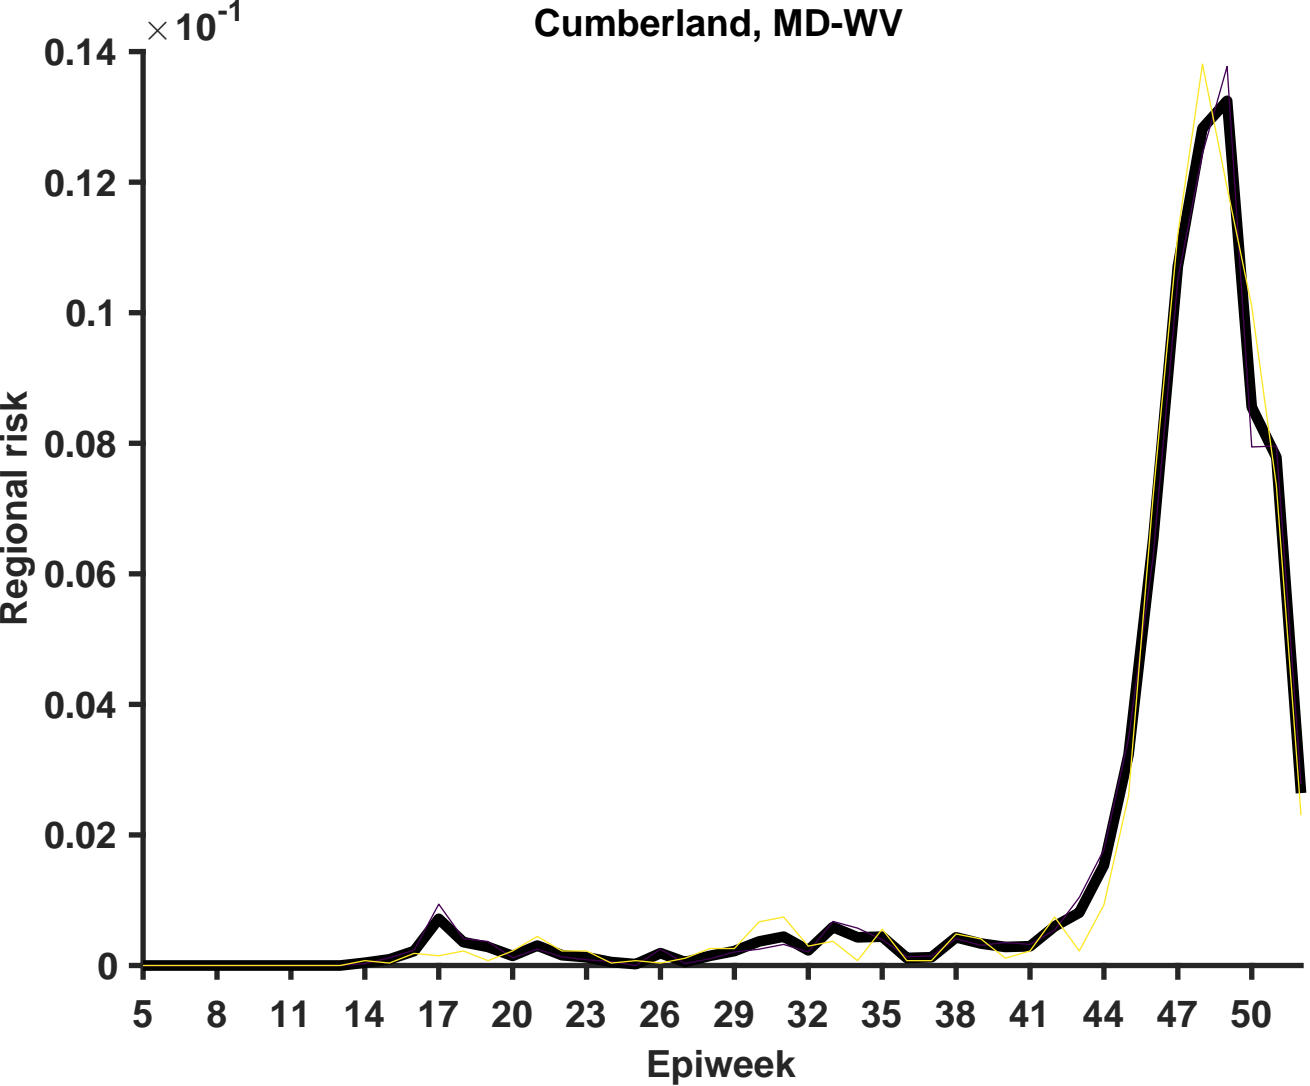

# Pocatello, ID

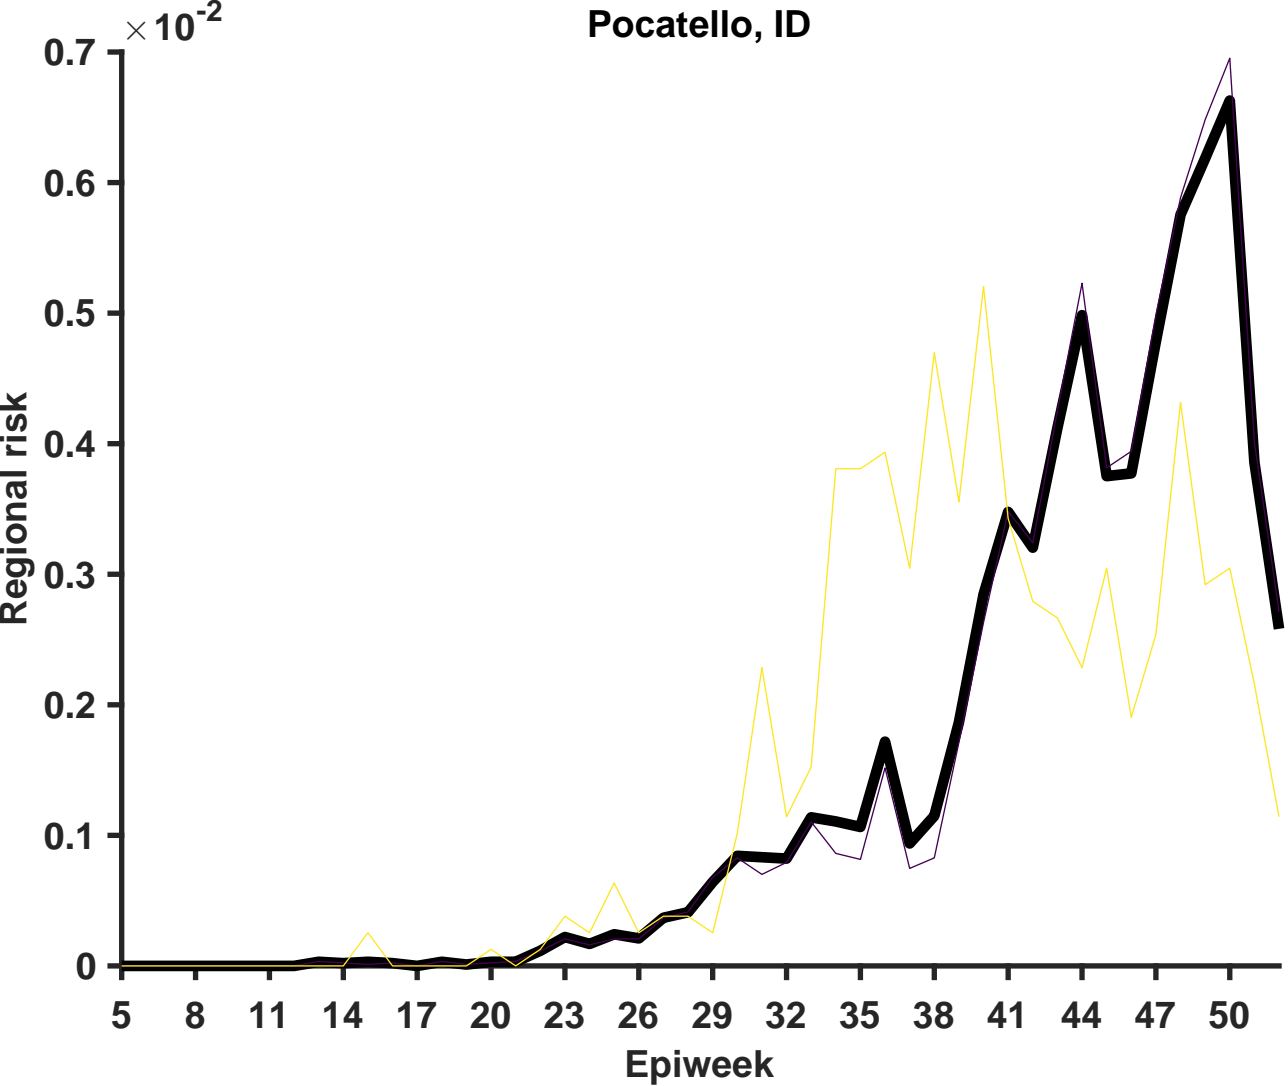

# Parkersburg-Vienna, OH-WV

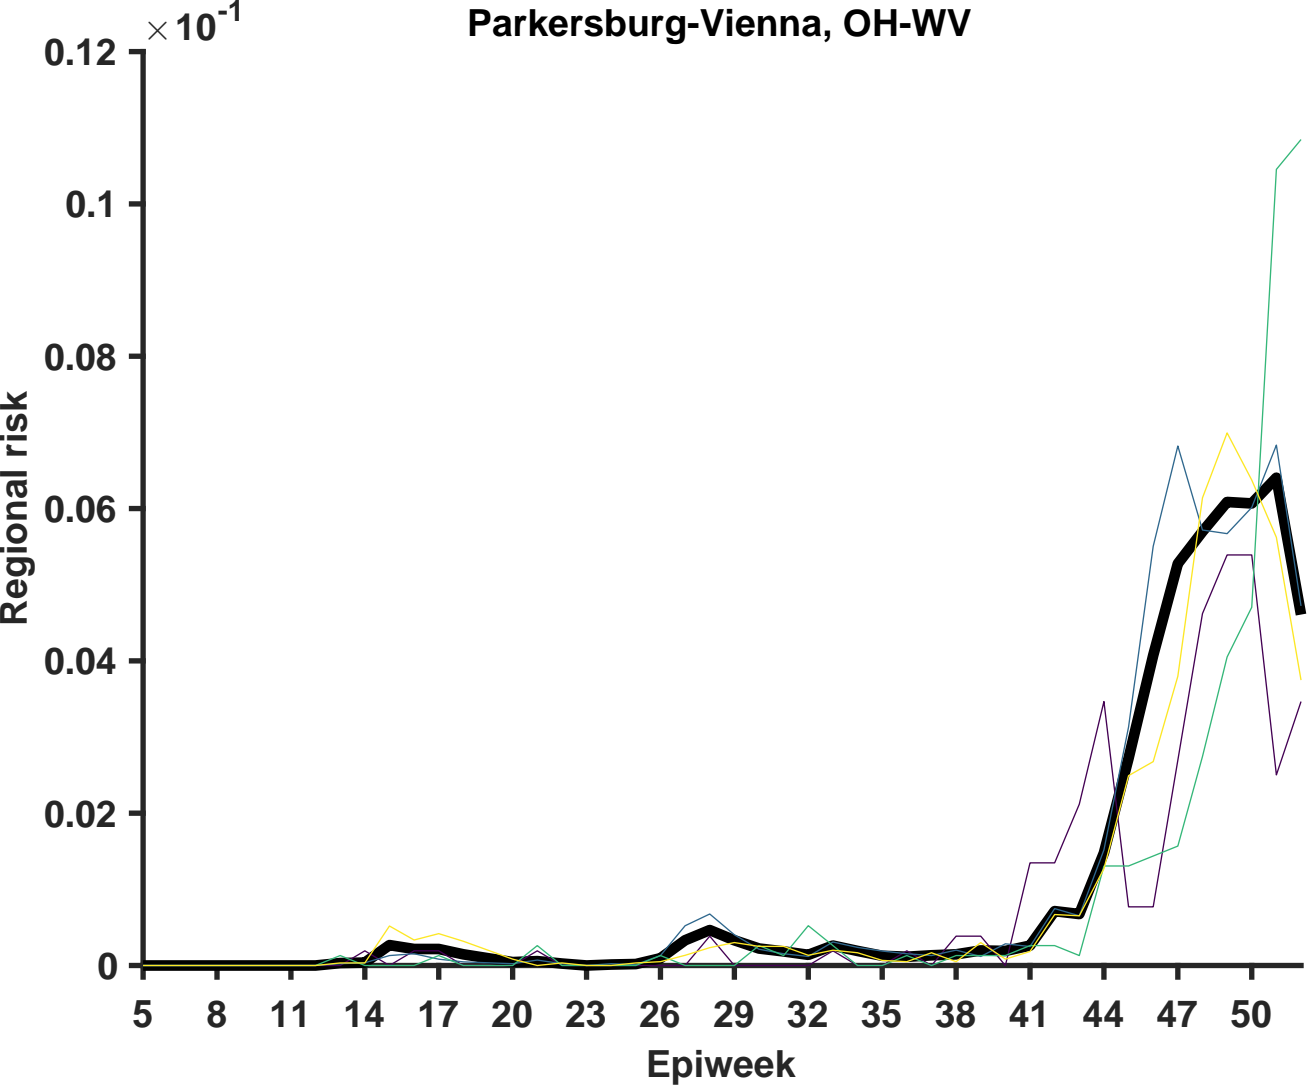

# Pine Bluff, AR

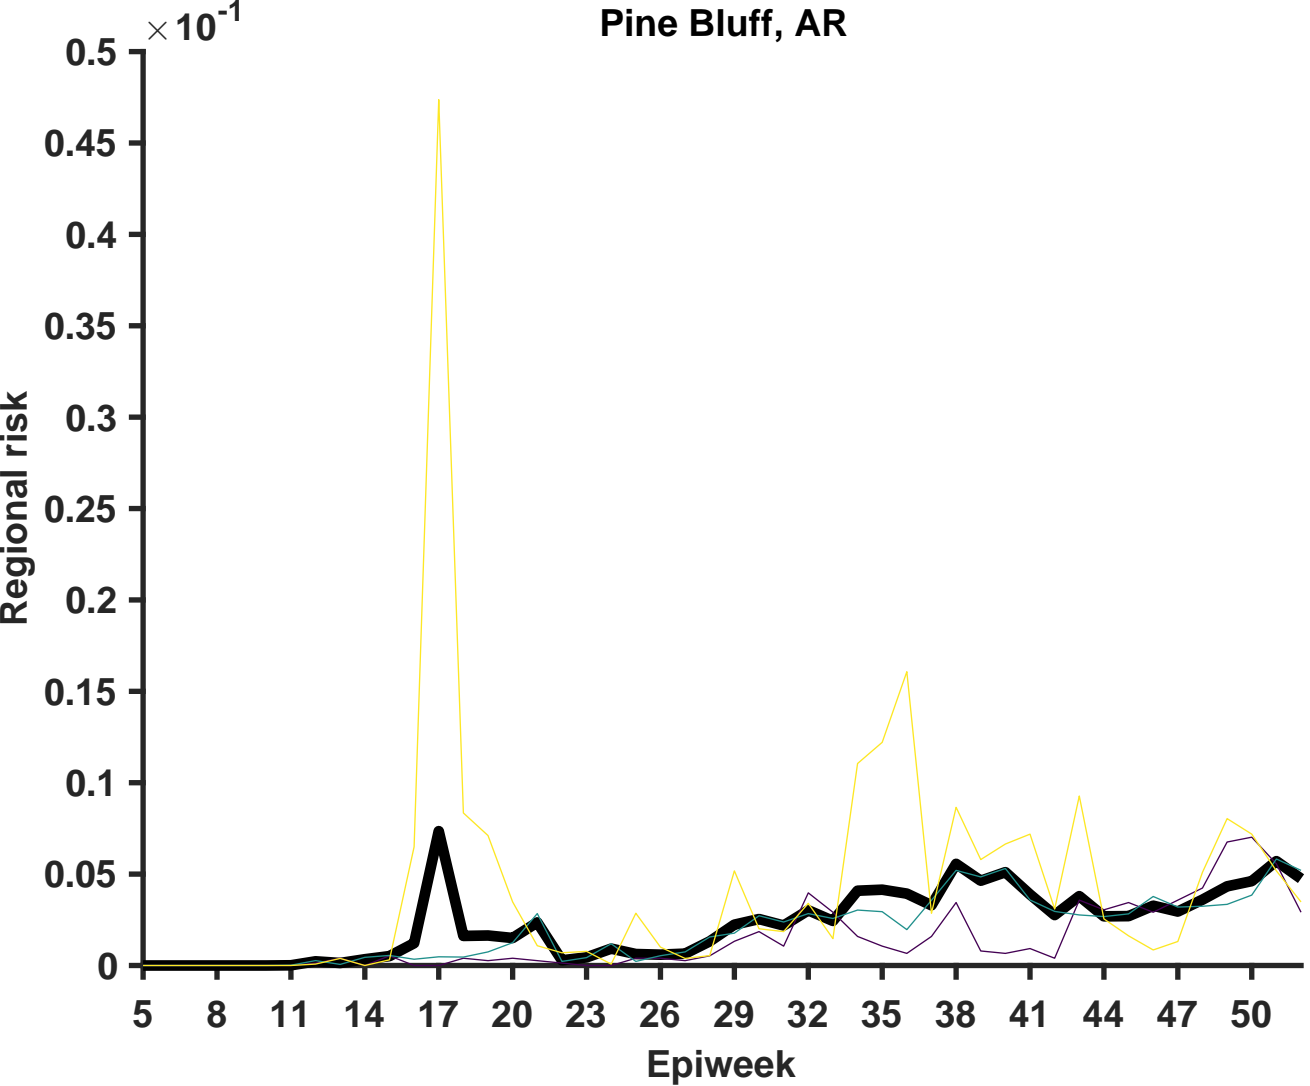



# Bloomsburg-Berwick, PA

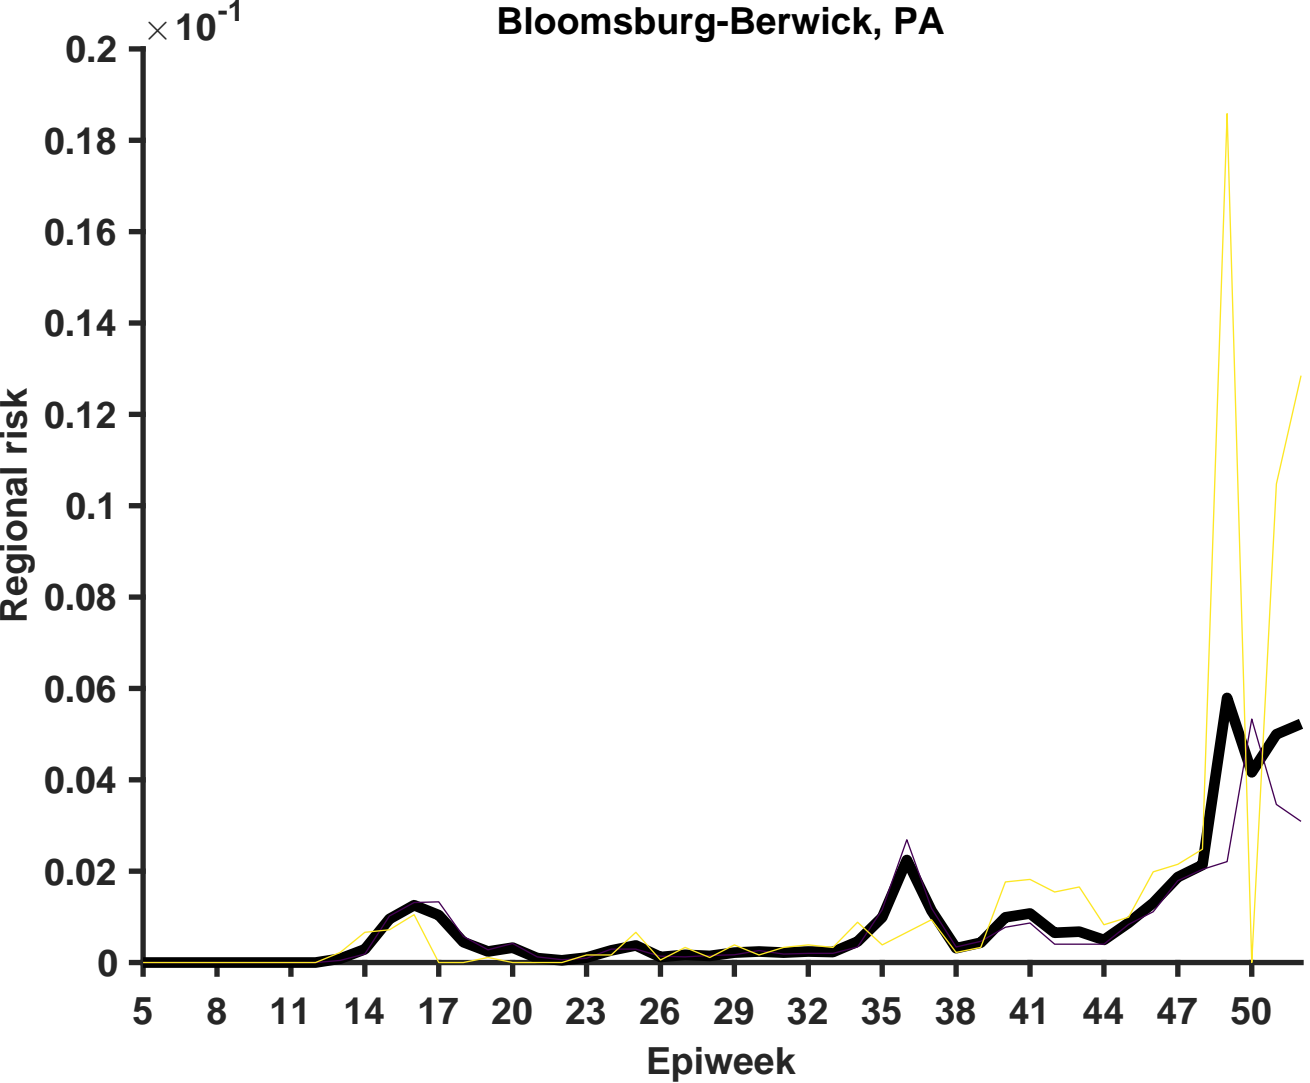

# Hinesville, GA

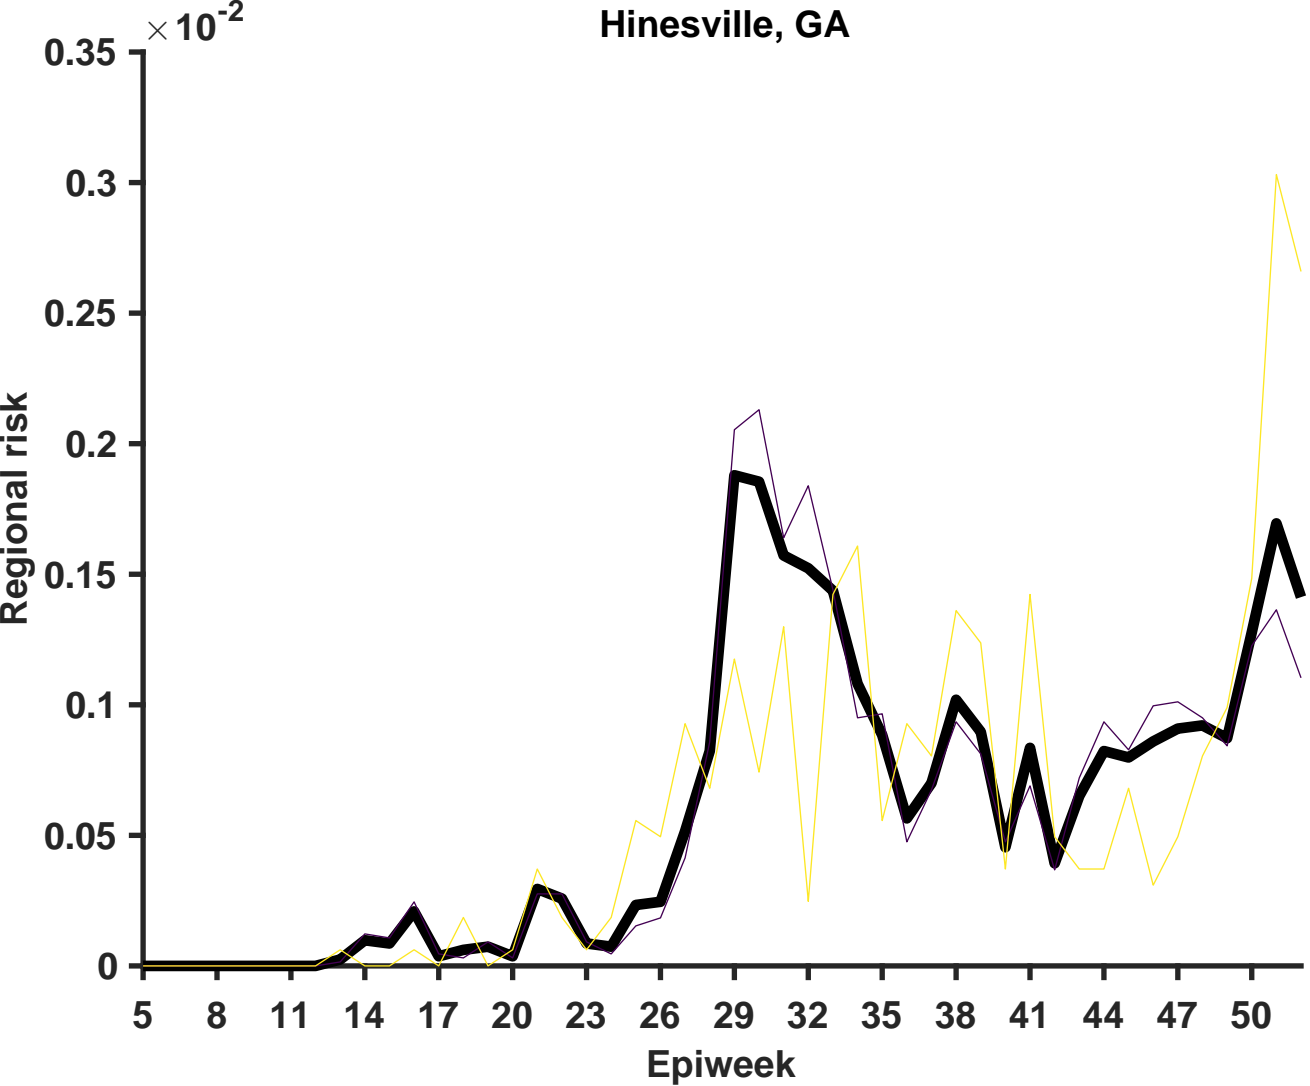

# Grand Island, NE

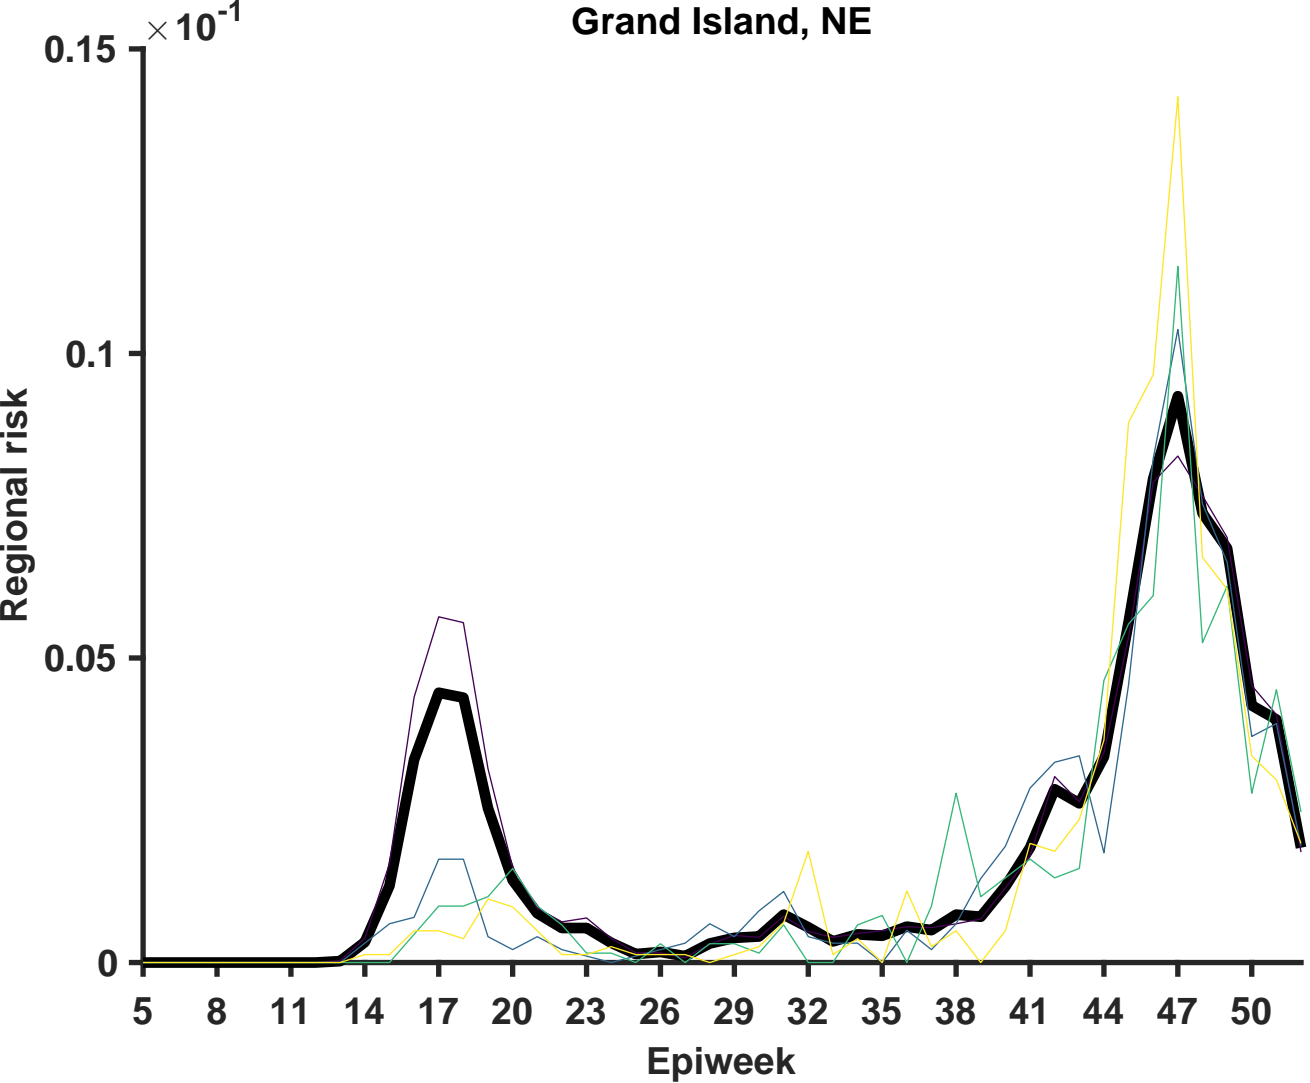

# Lewiston, ID-WA

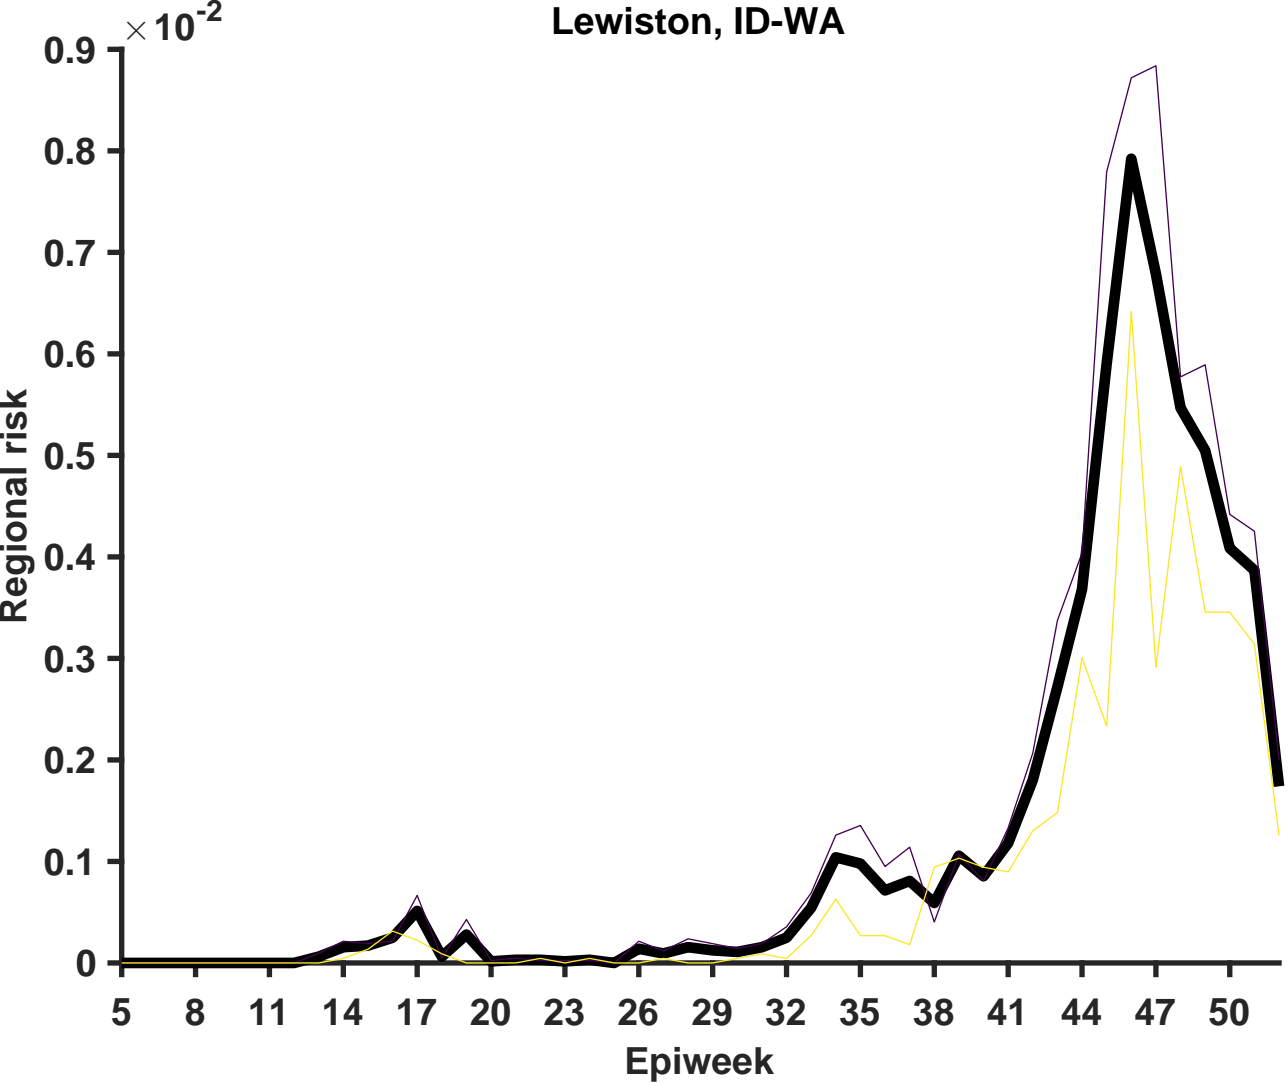

Supplement: Supplementary file [file media-2.pdf]
