# Supplementary material for: Differential contagiousness of respiratory disease across the United States
Source: bioRxiv or medRxiv preprint supplement (doi:10.1101/2022.09.15.22279948), 2022-09-17

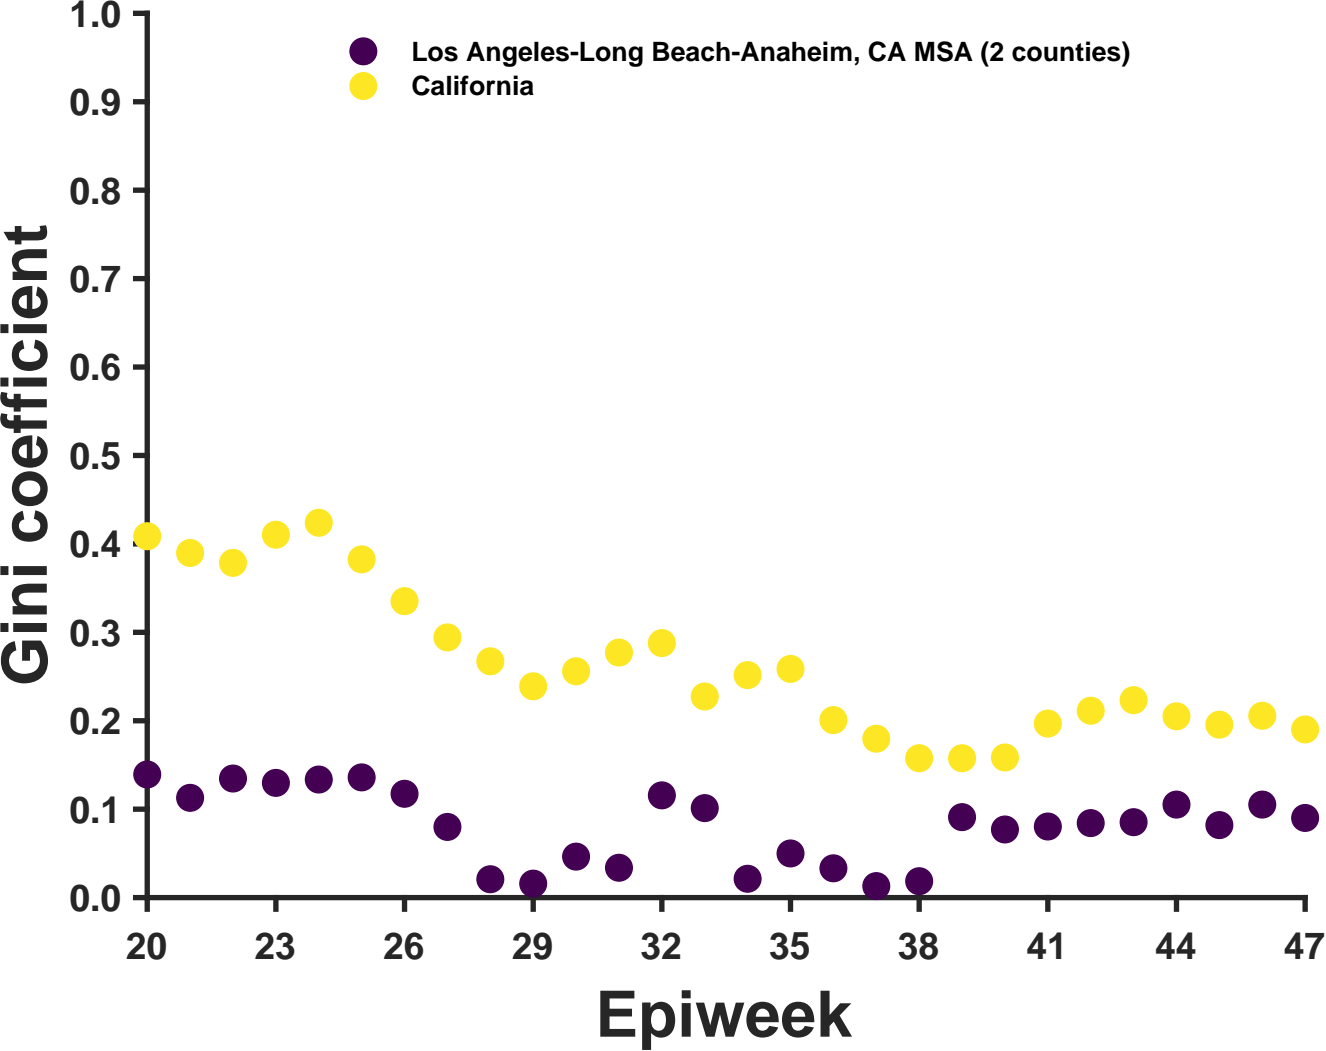

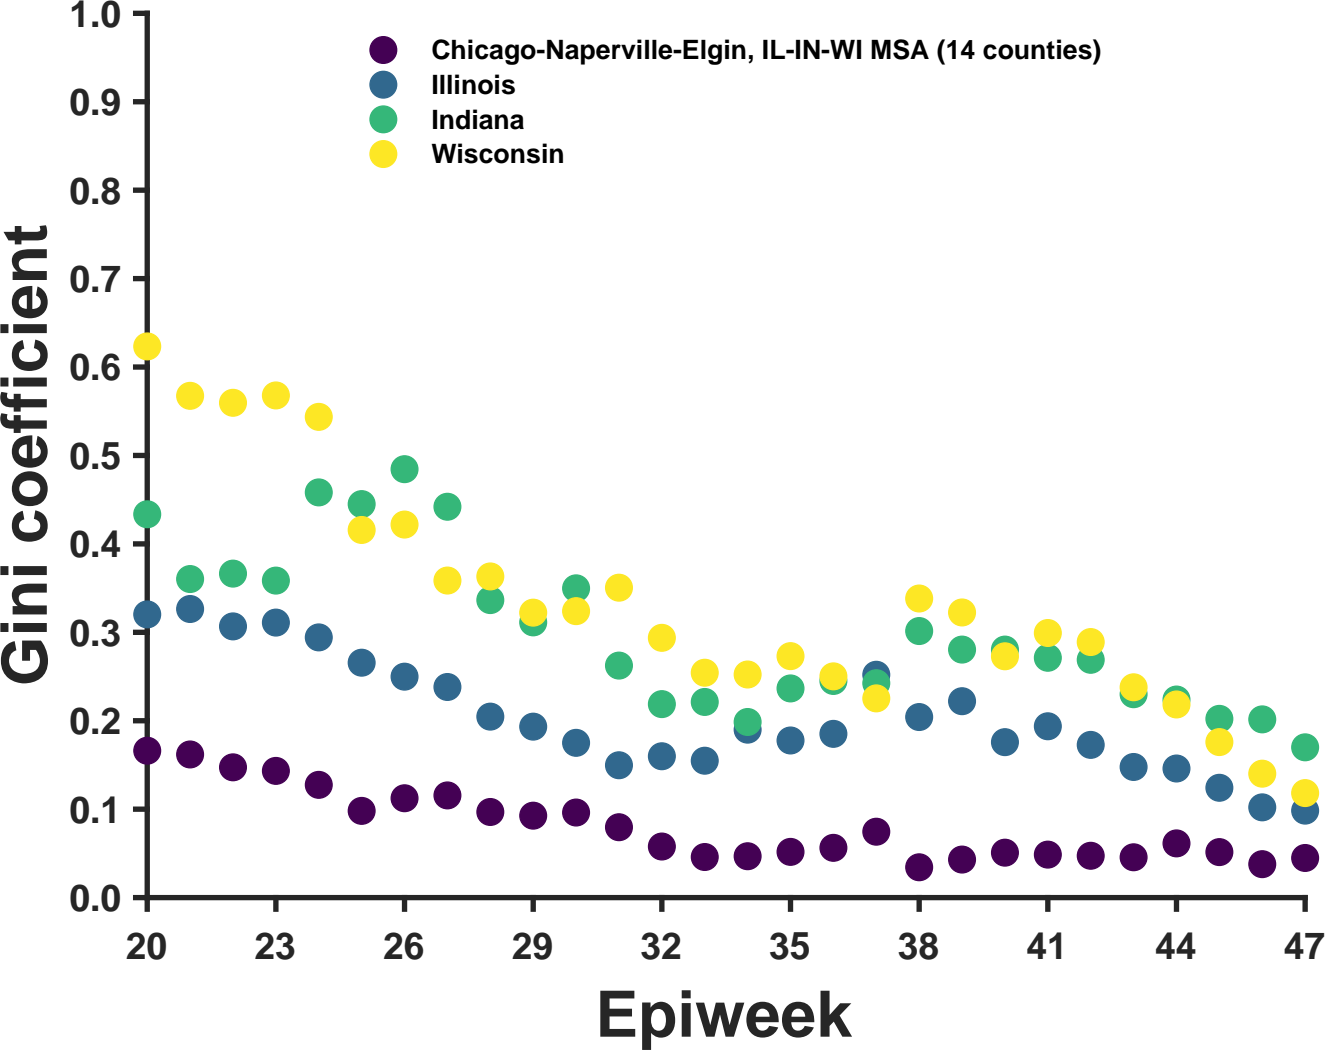

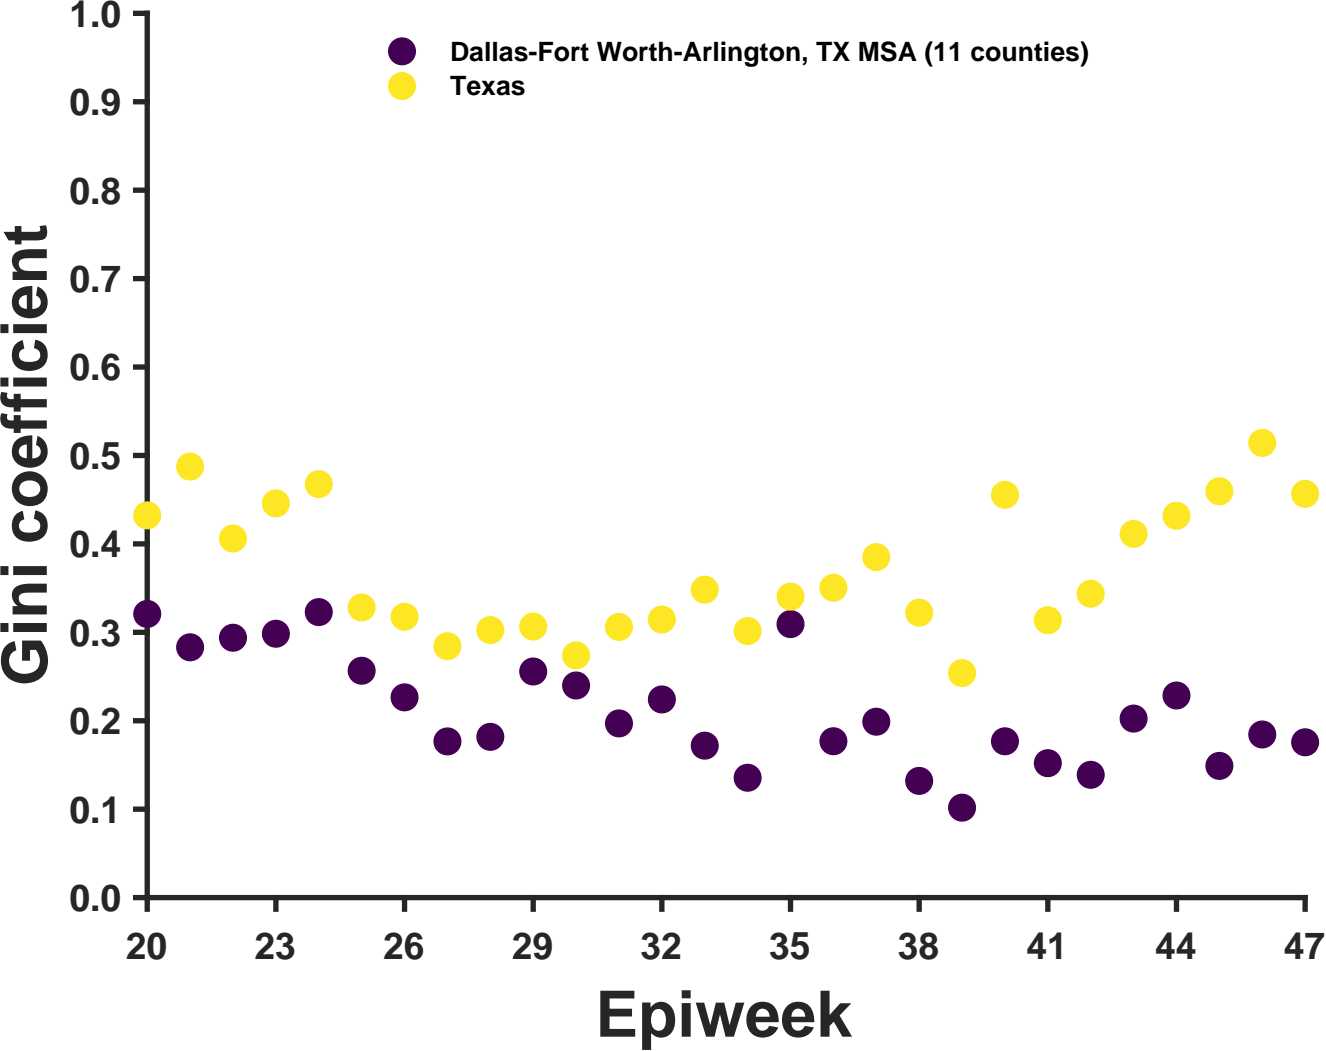

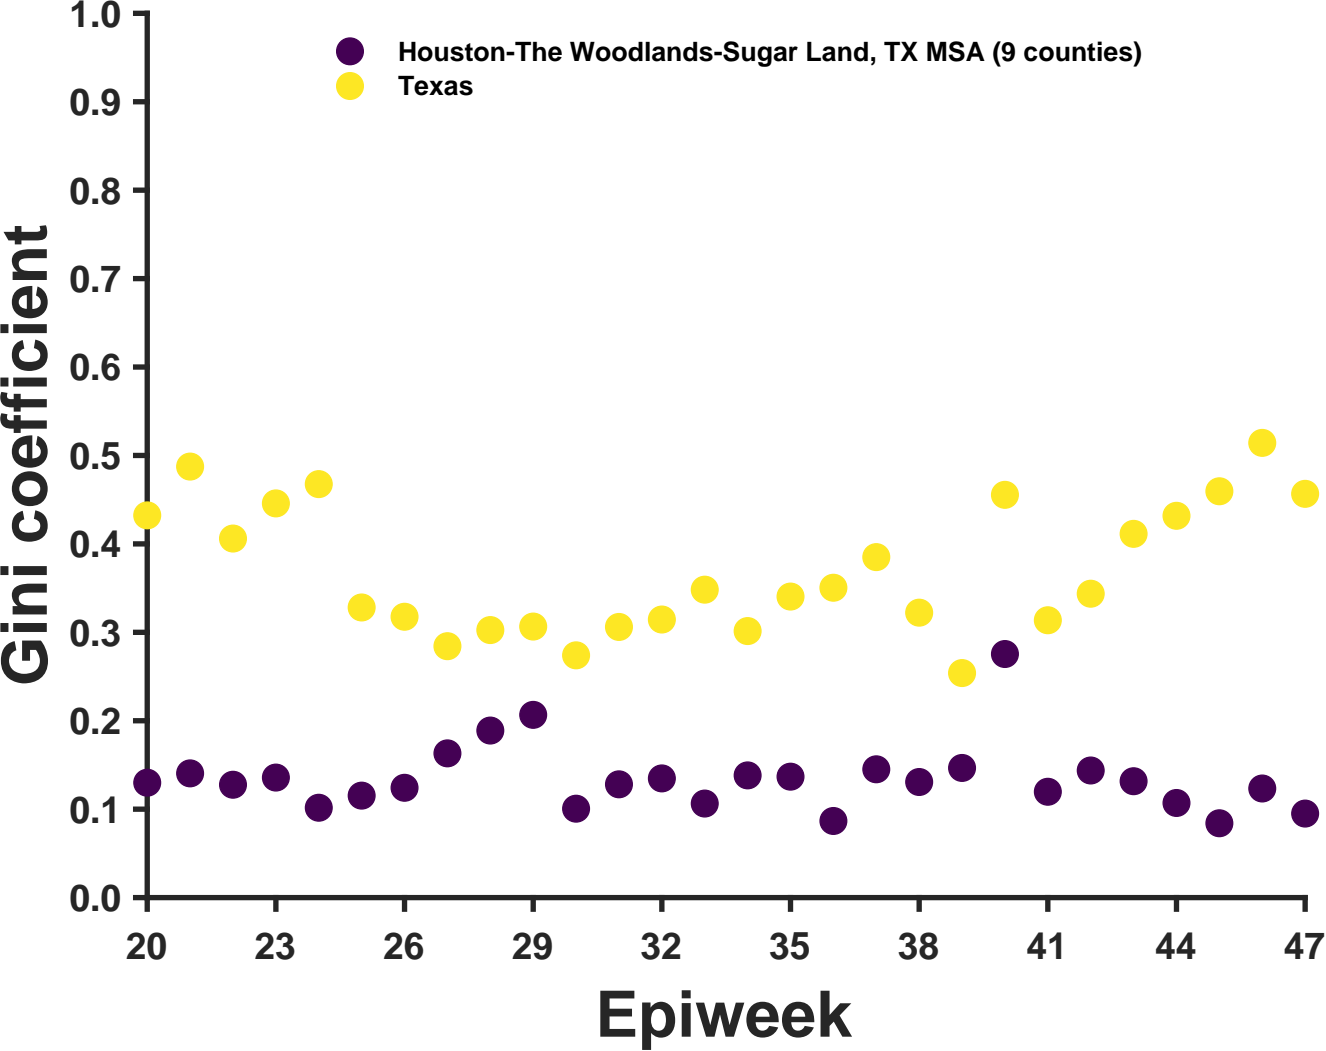

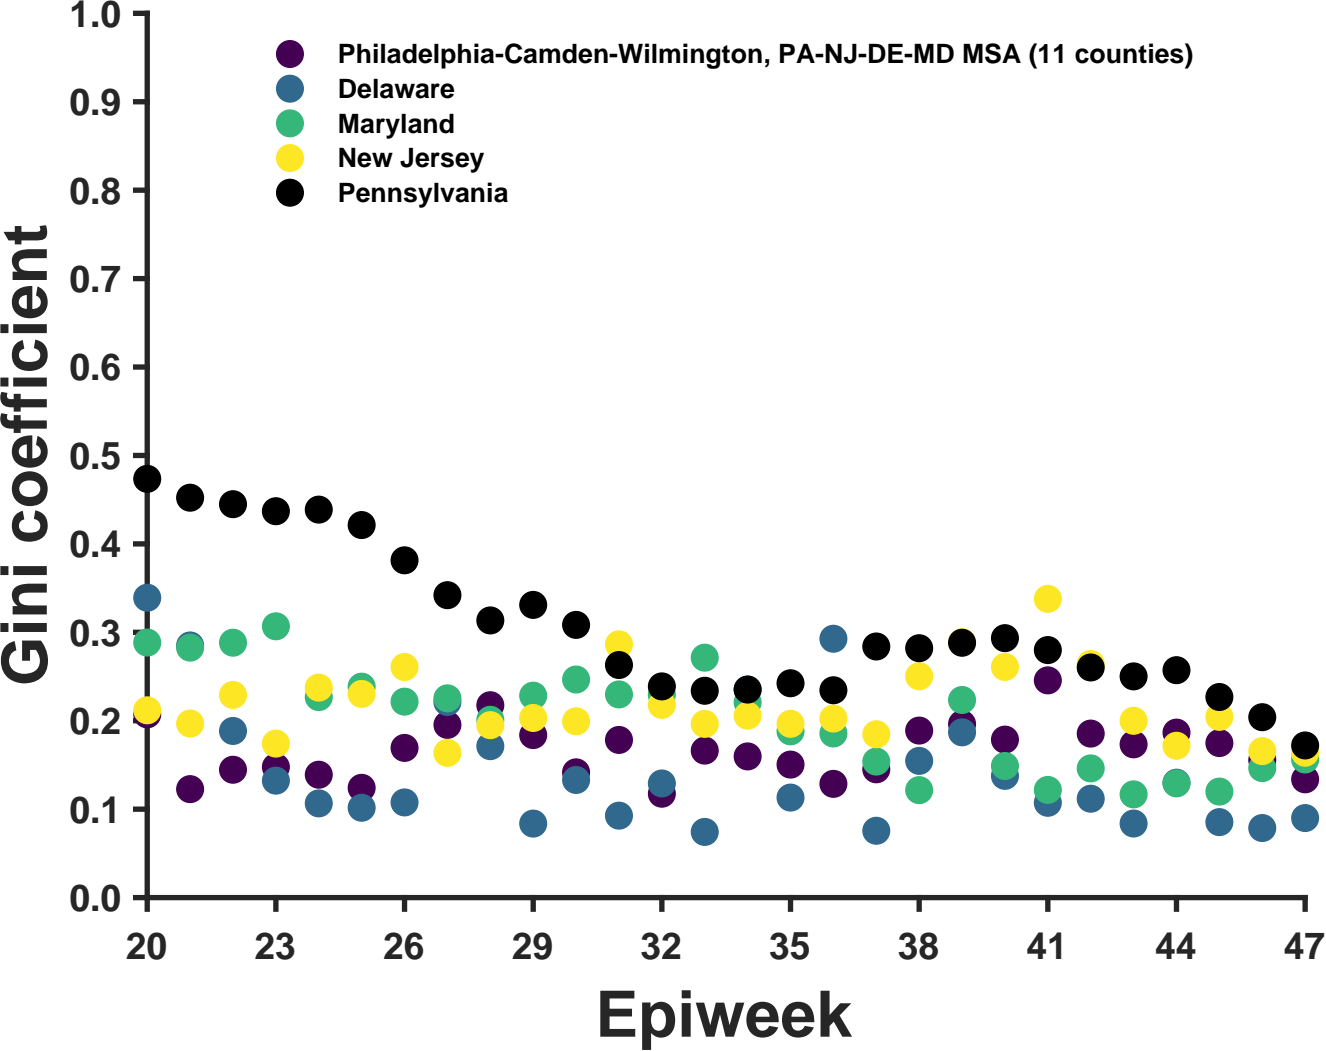

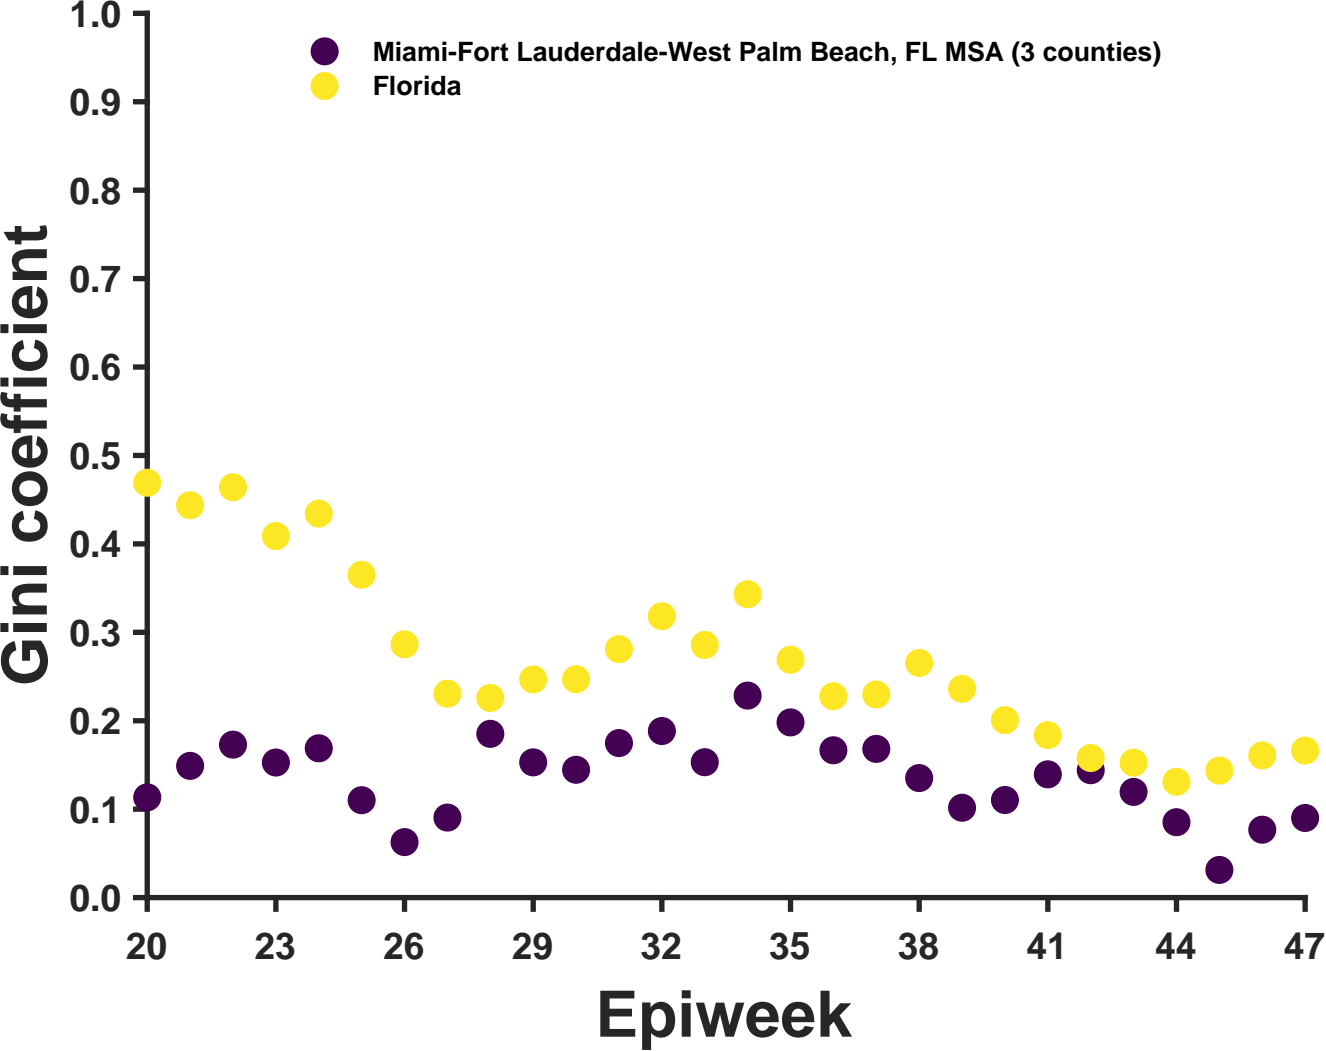

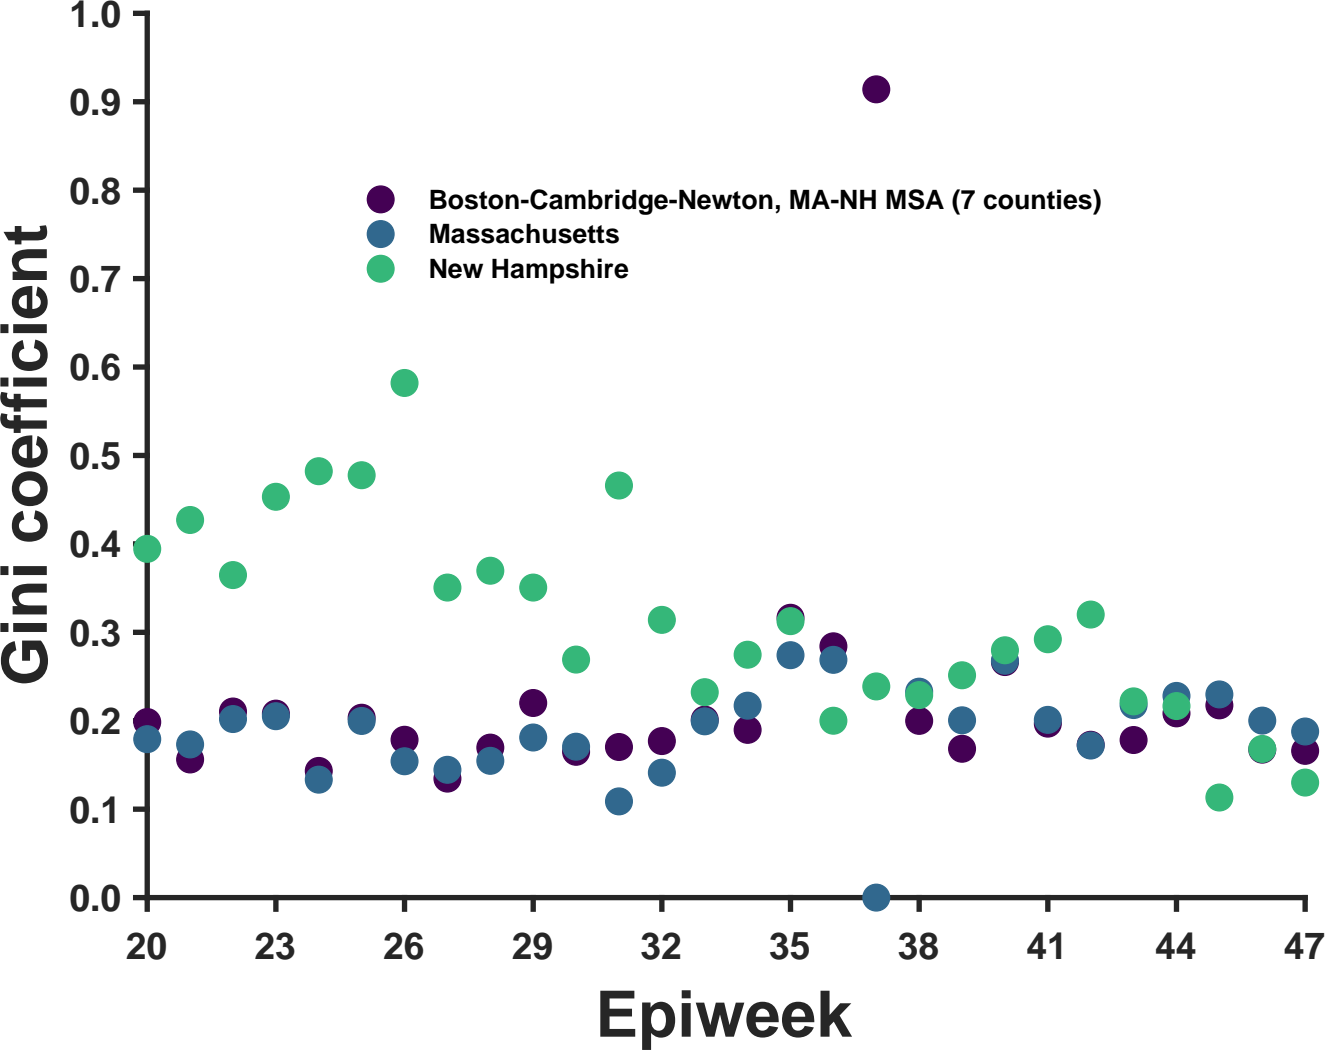

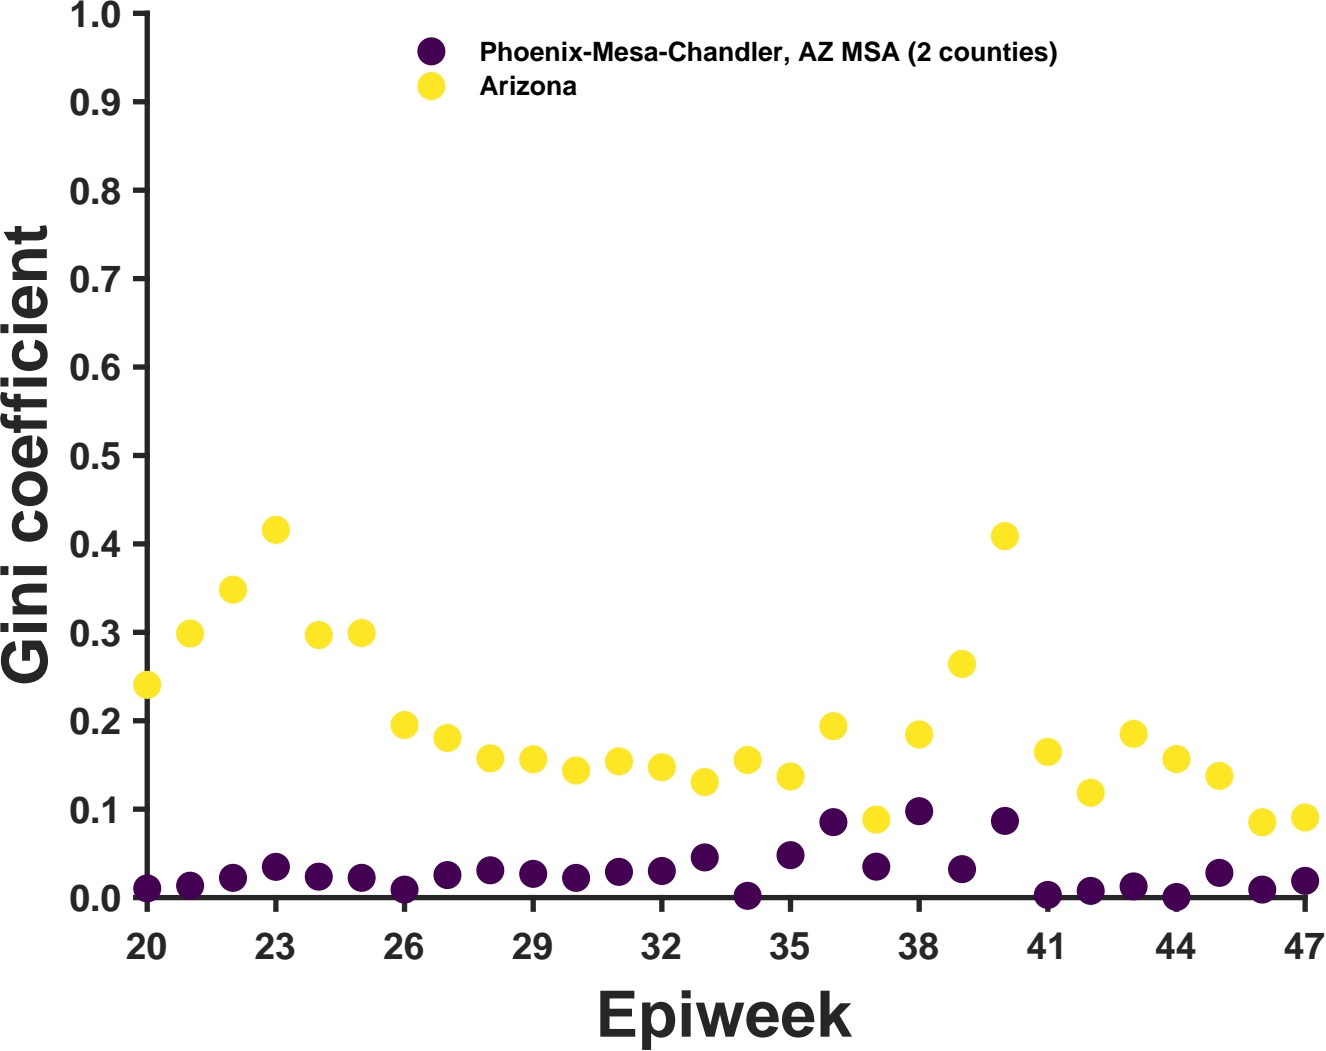



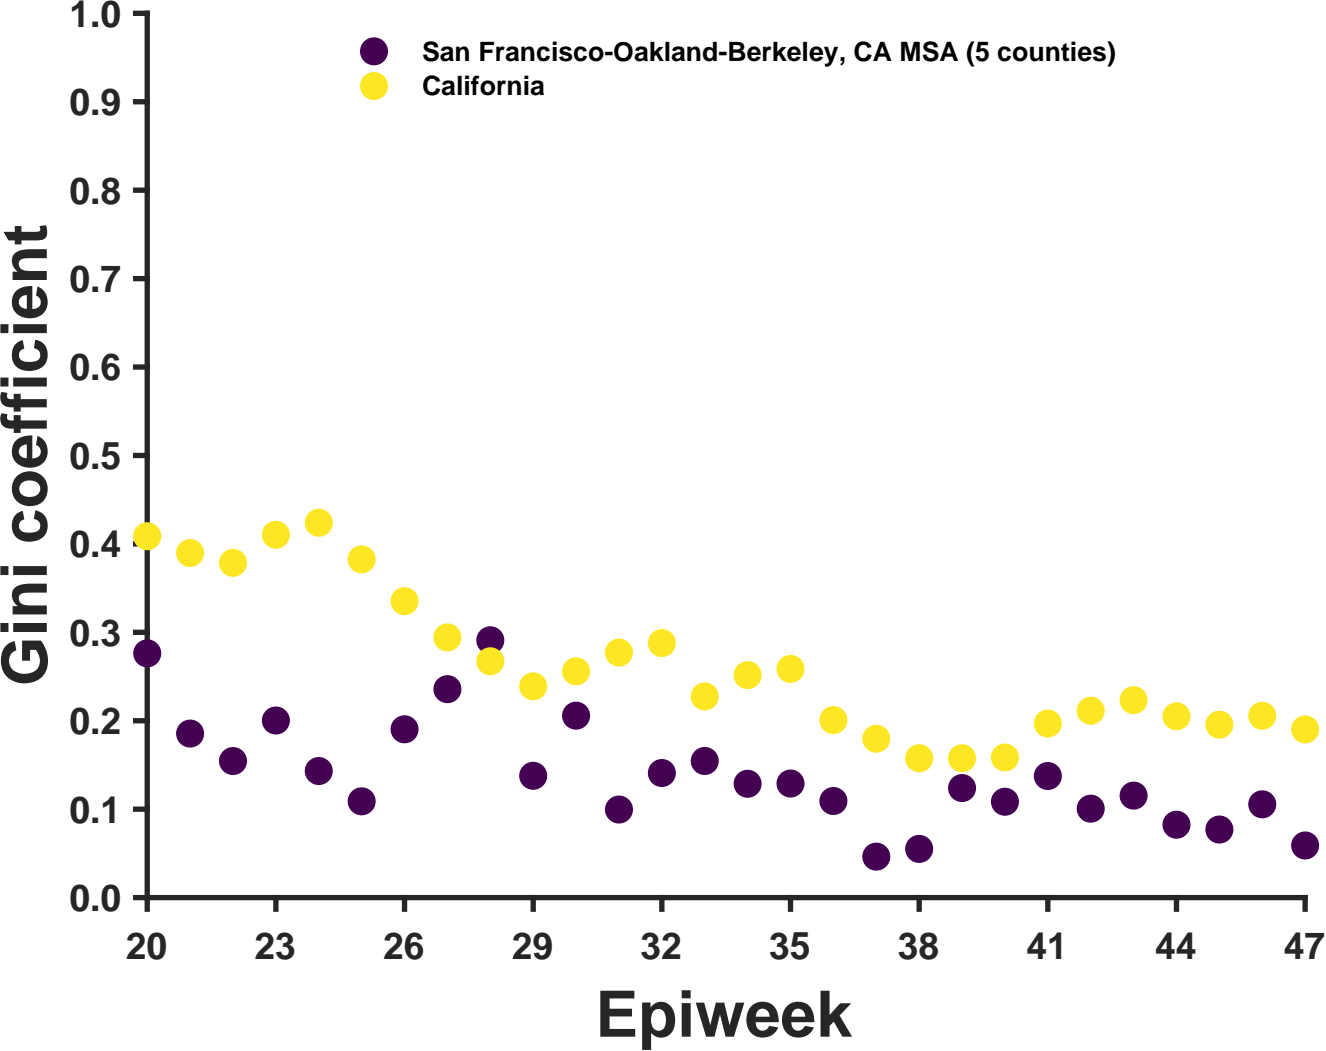

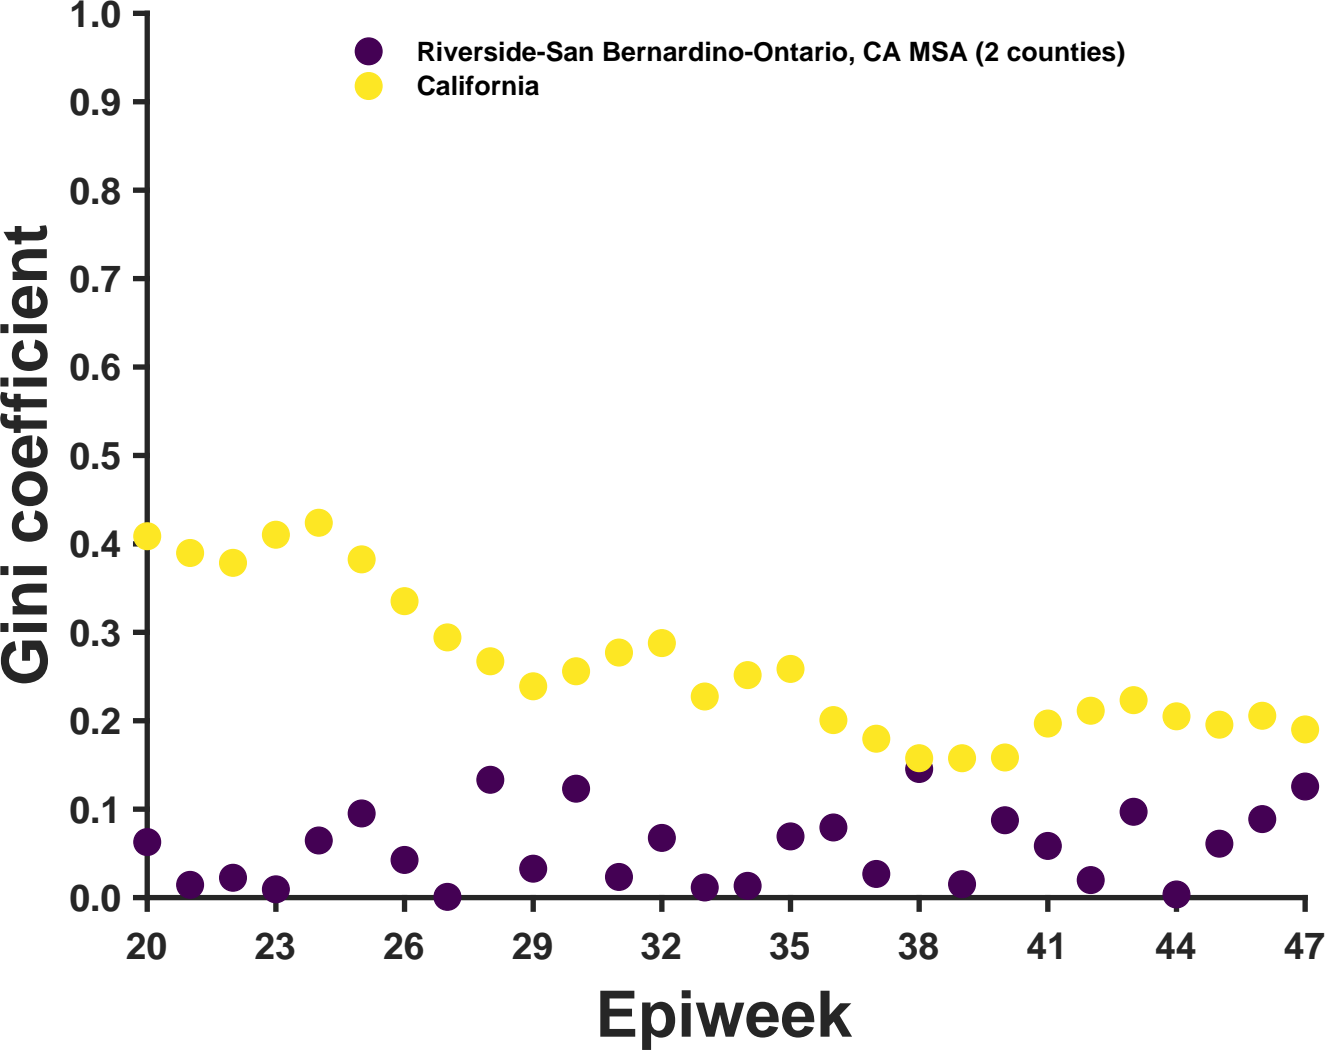

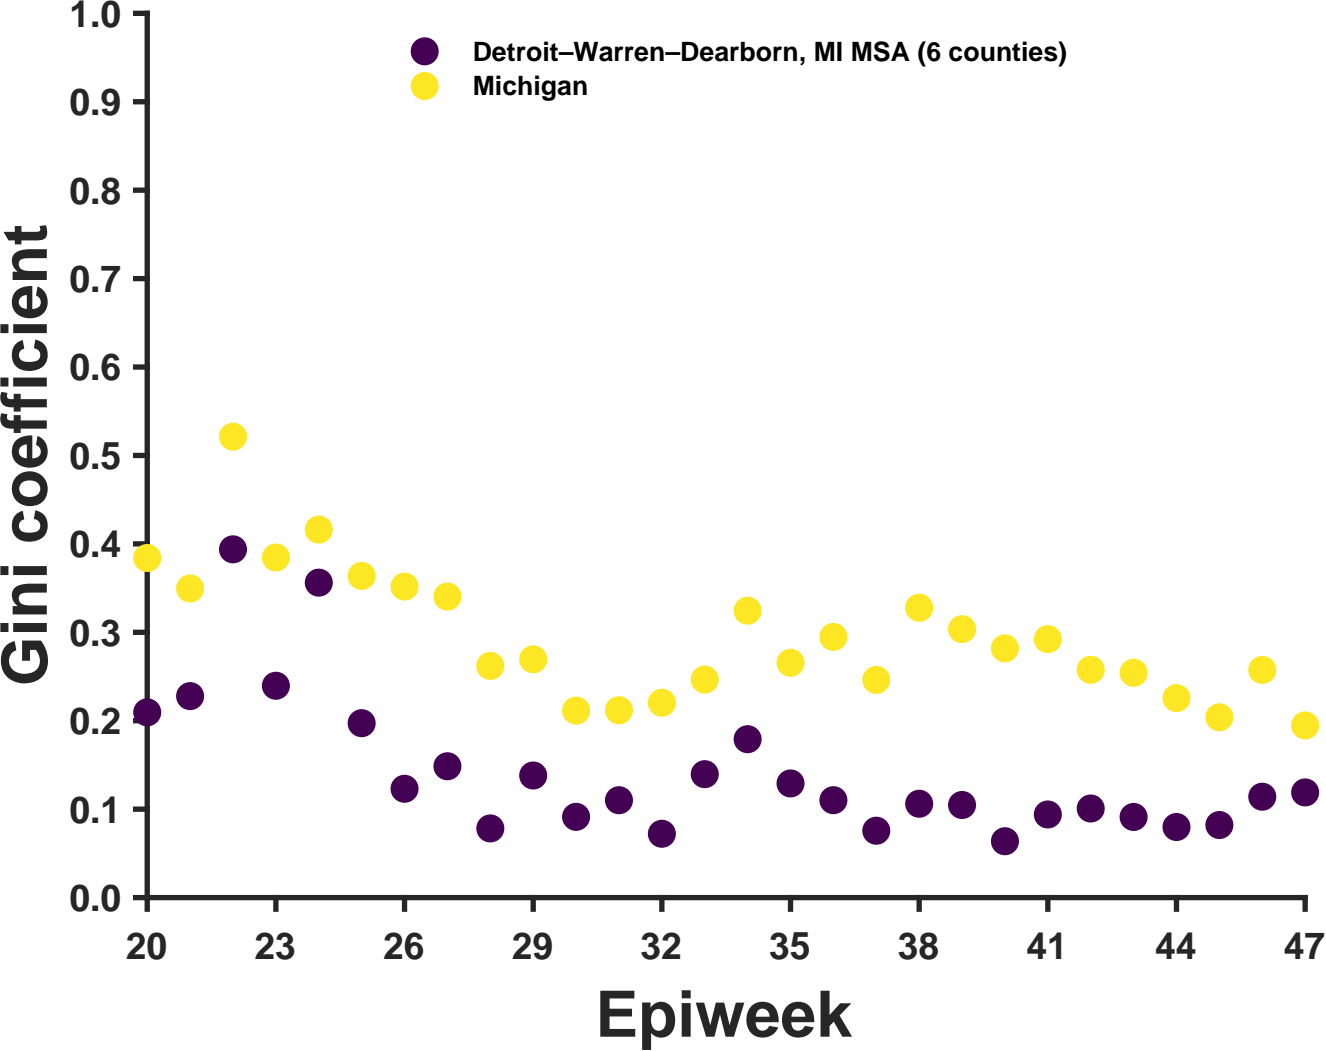

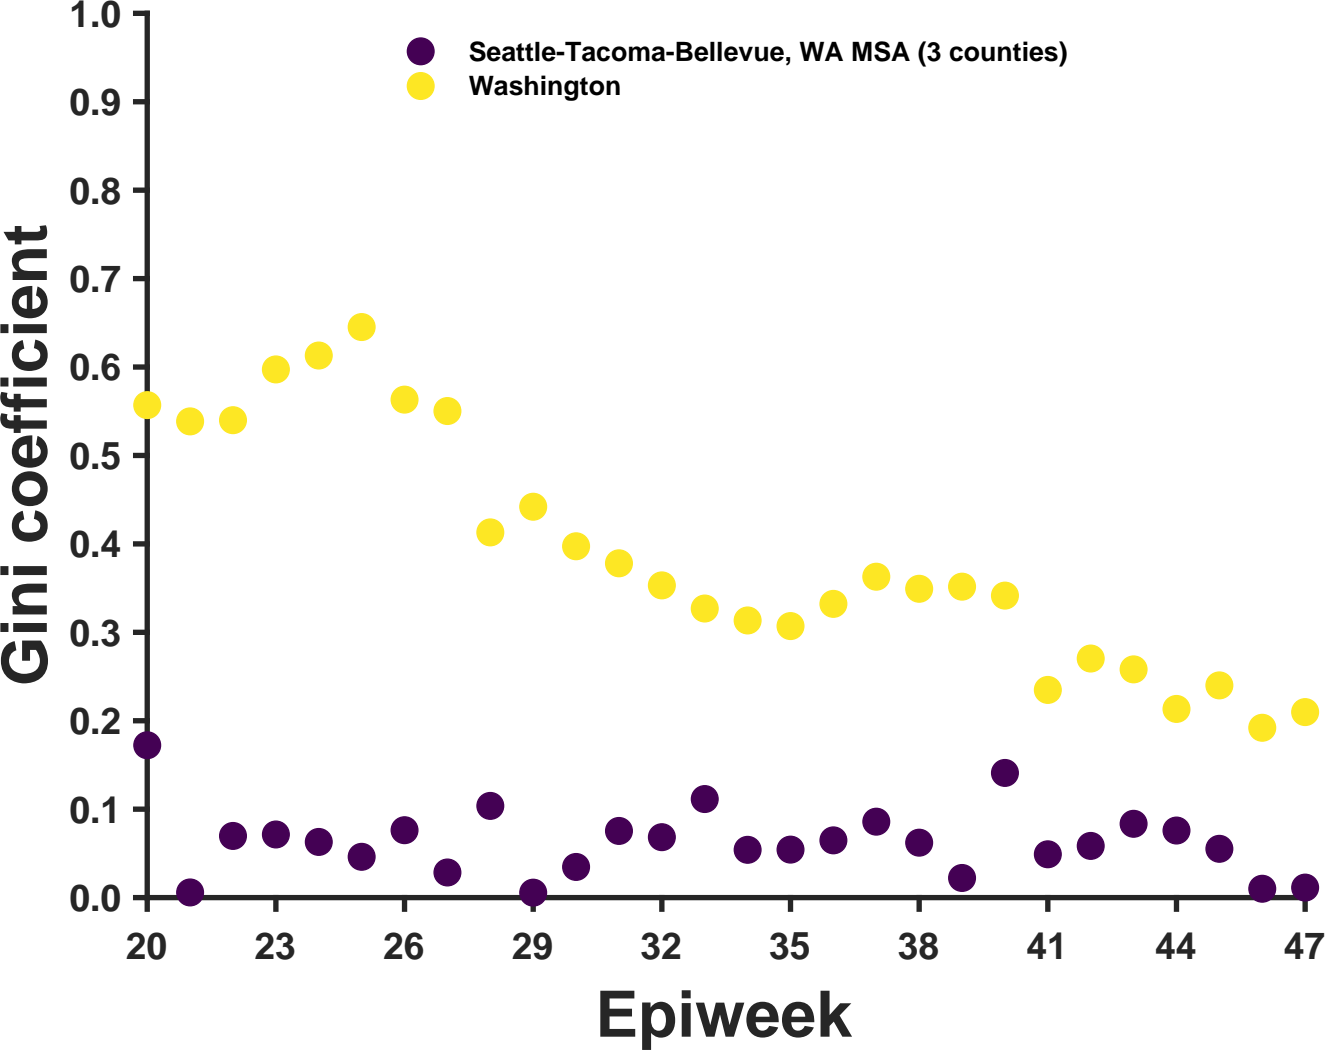

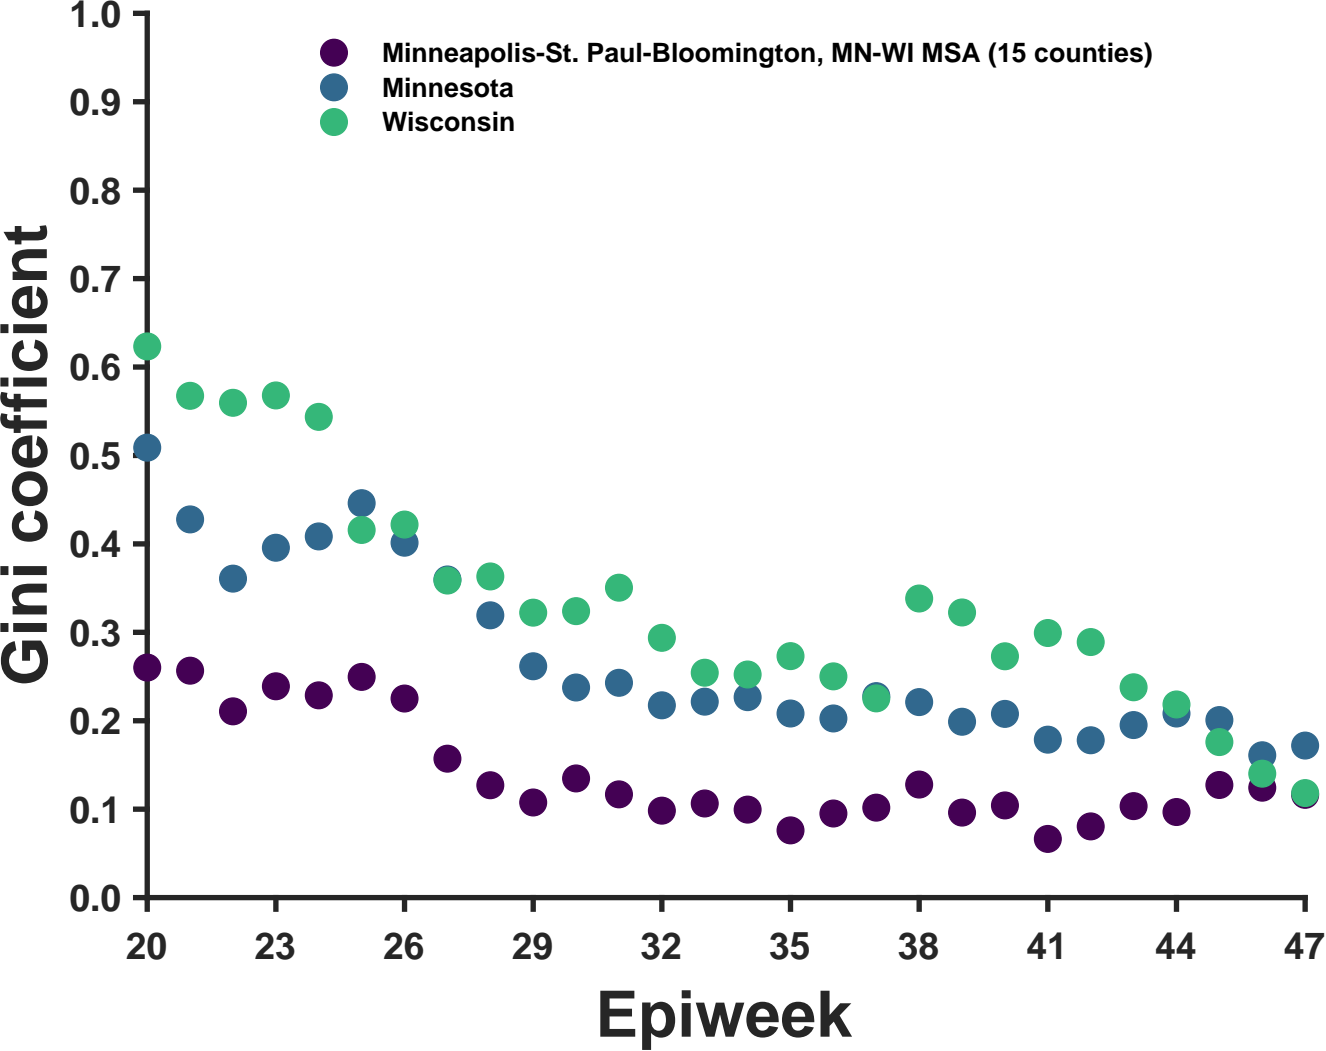

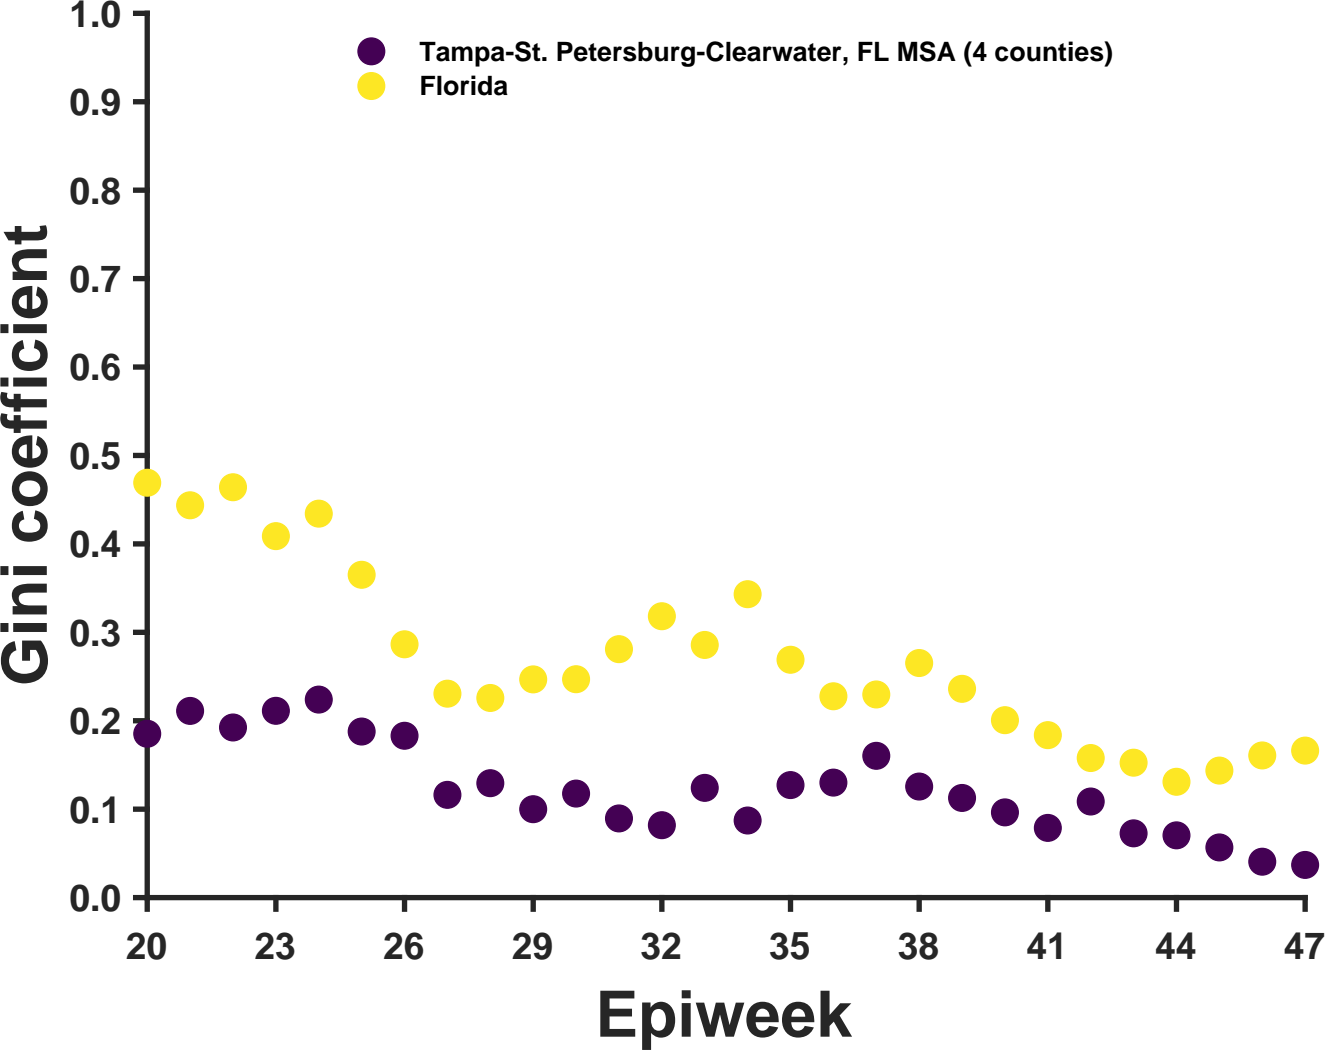

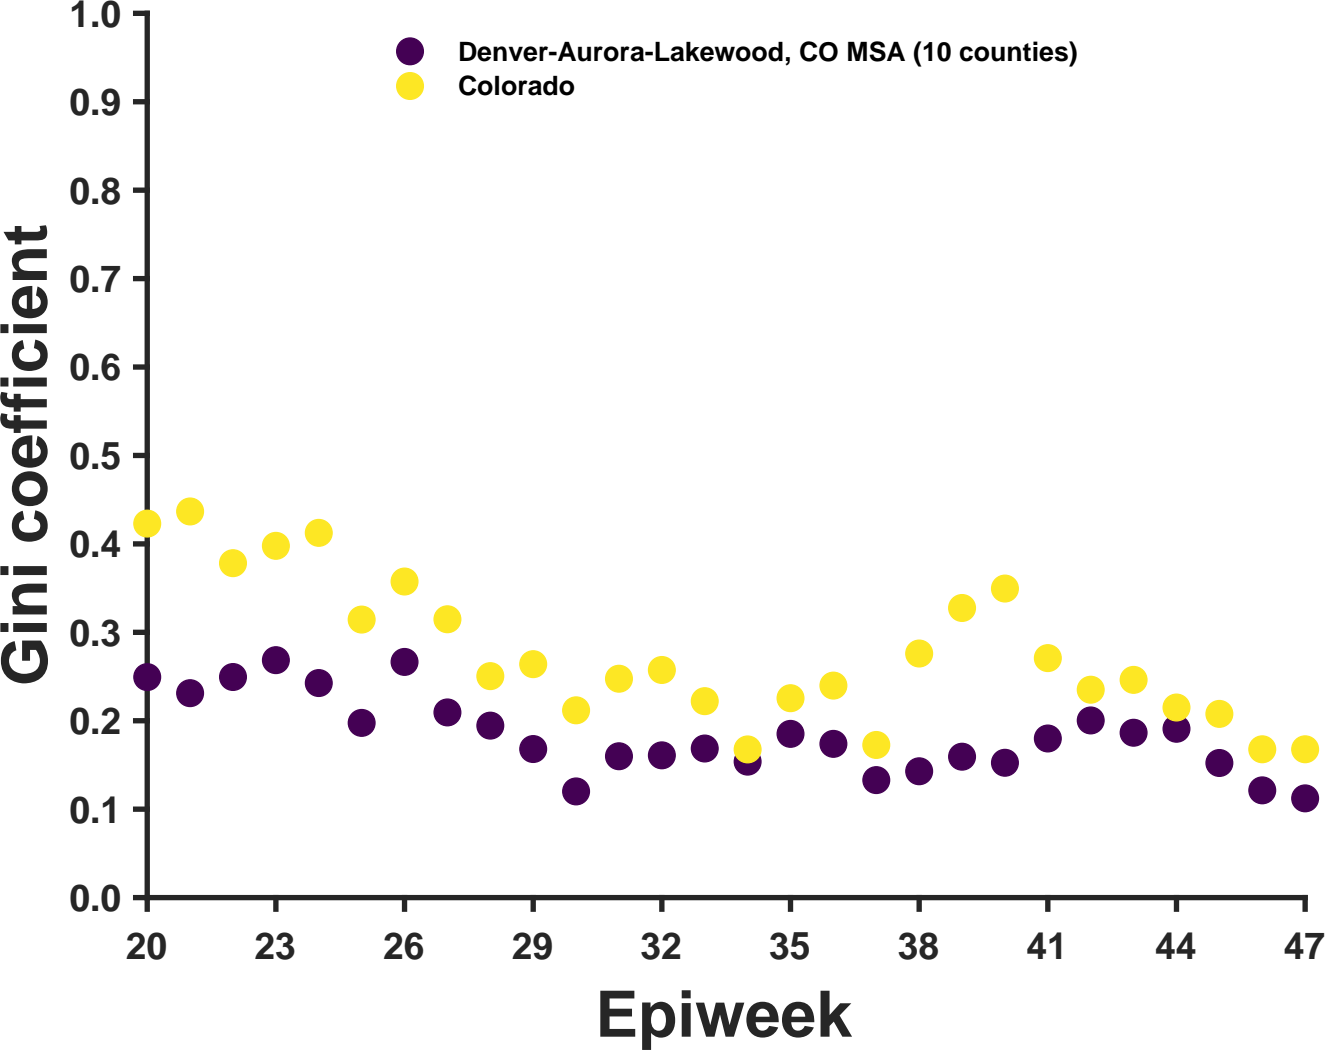

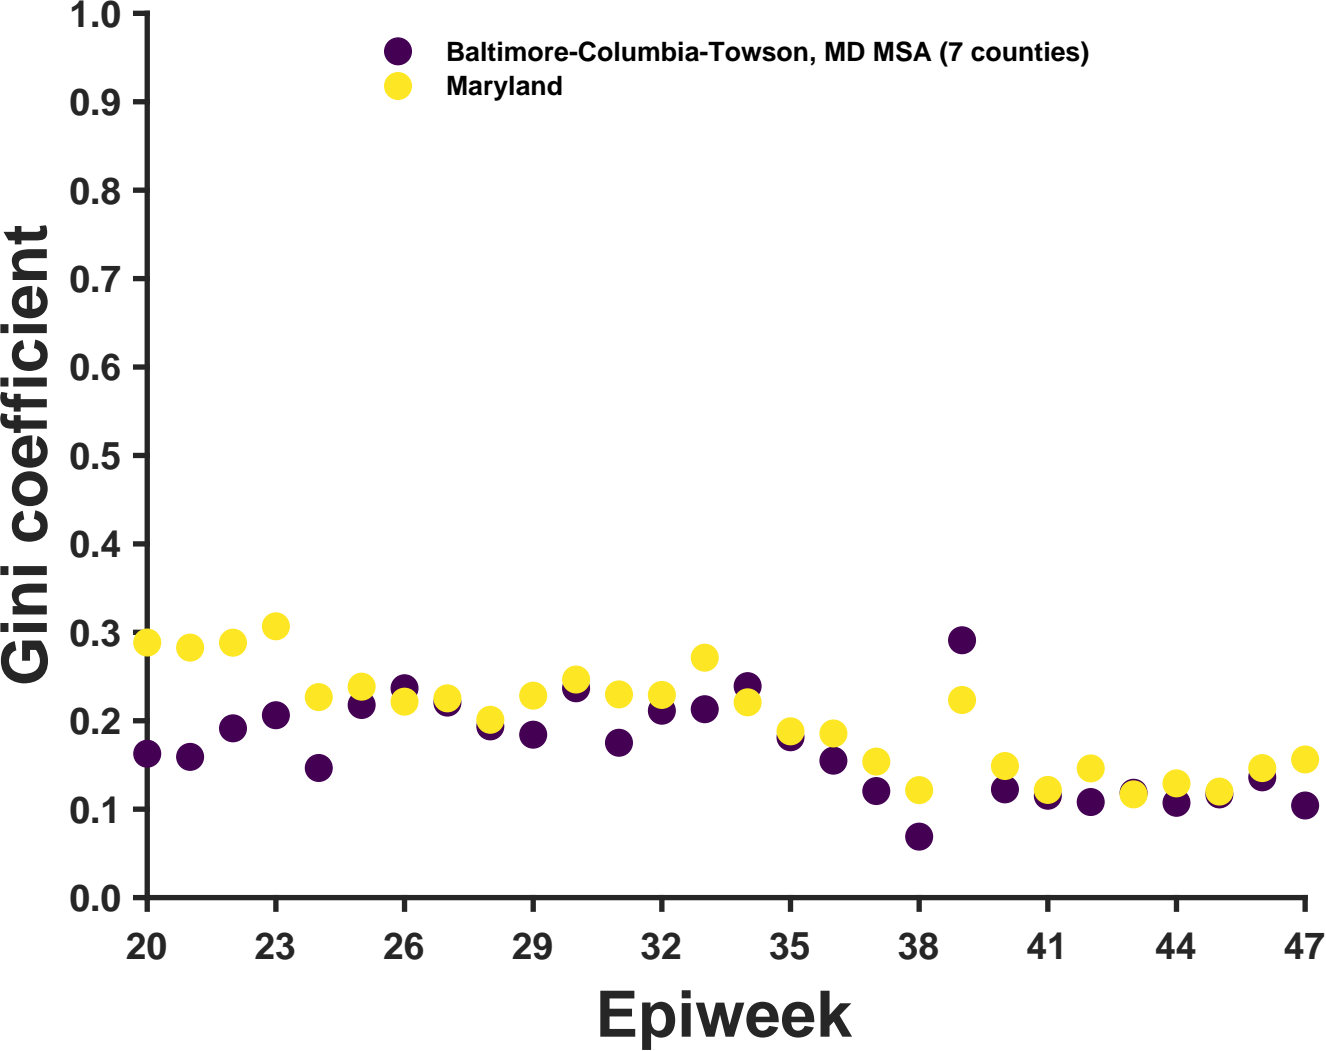



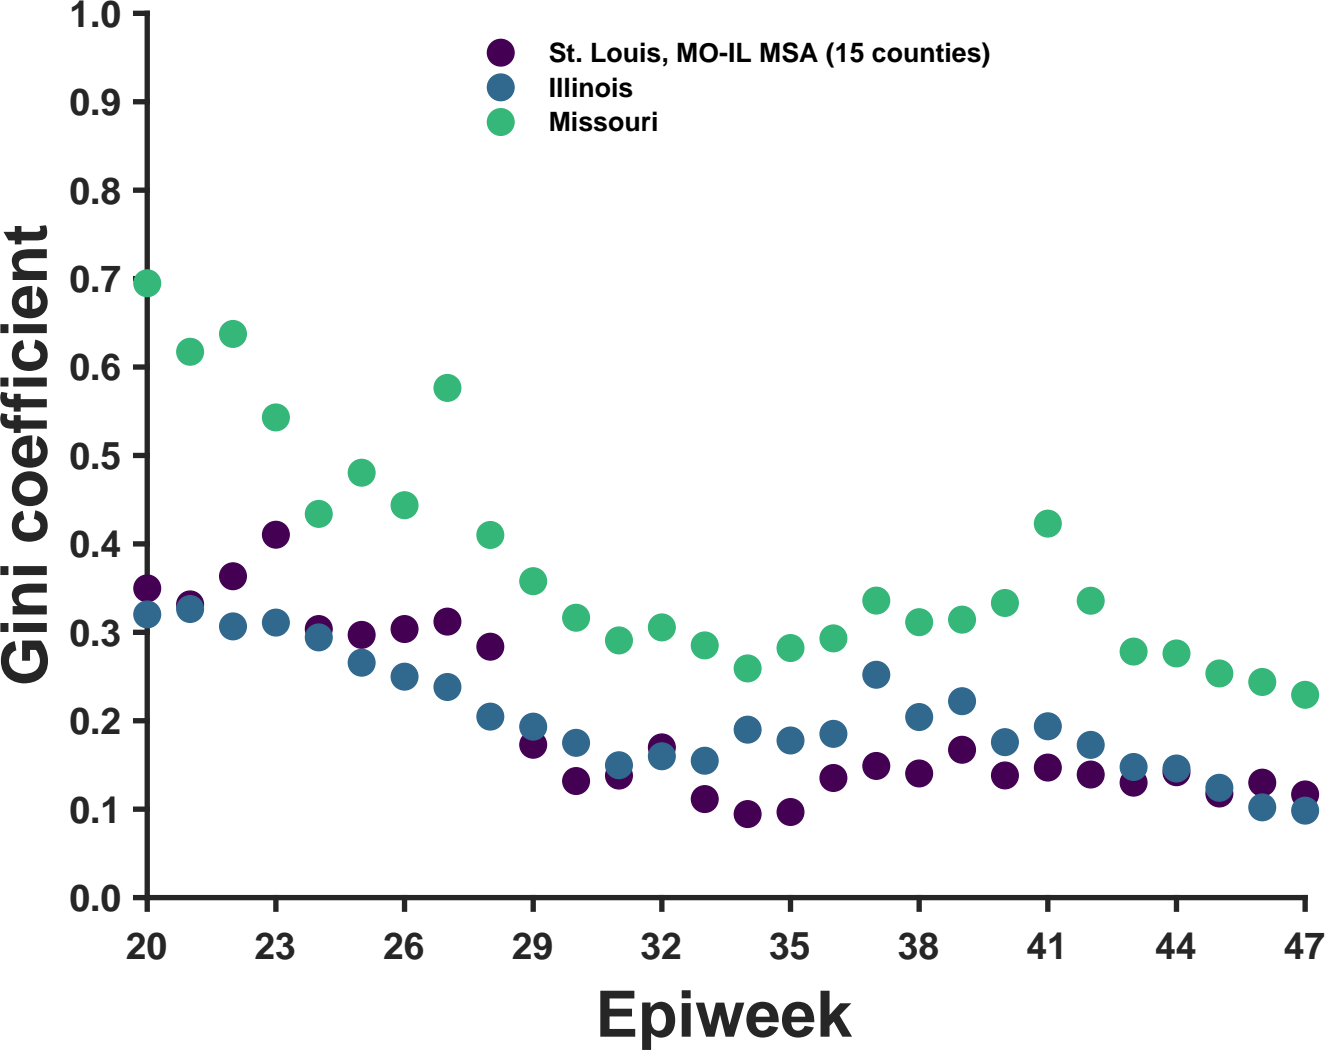

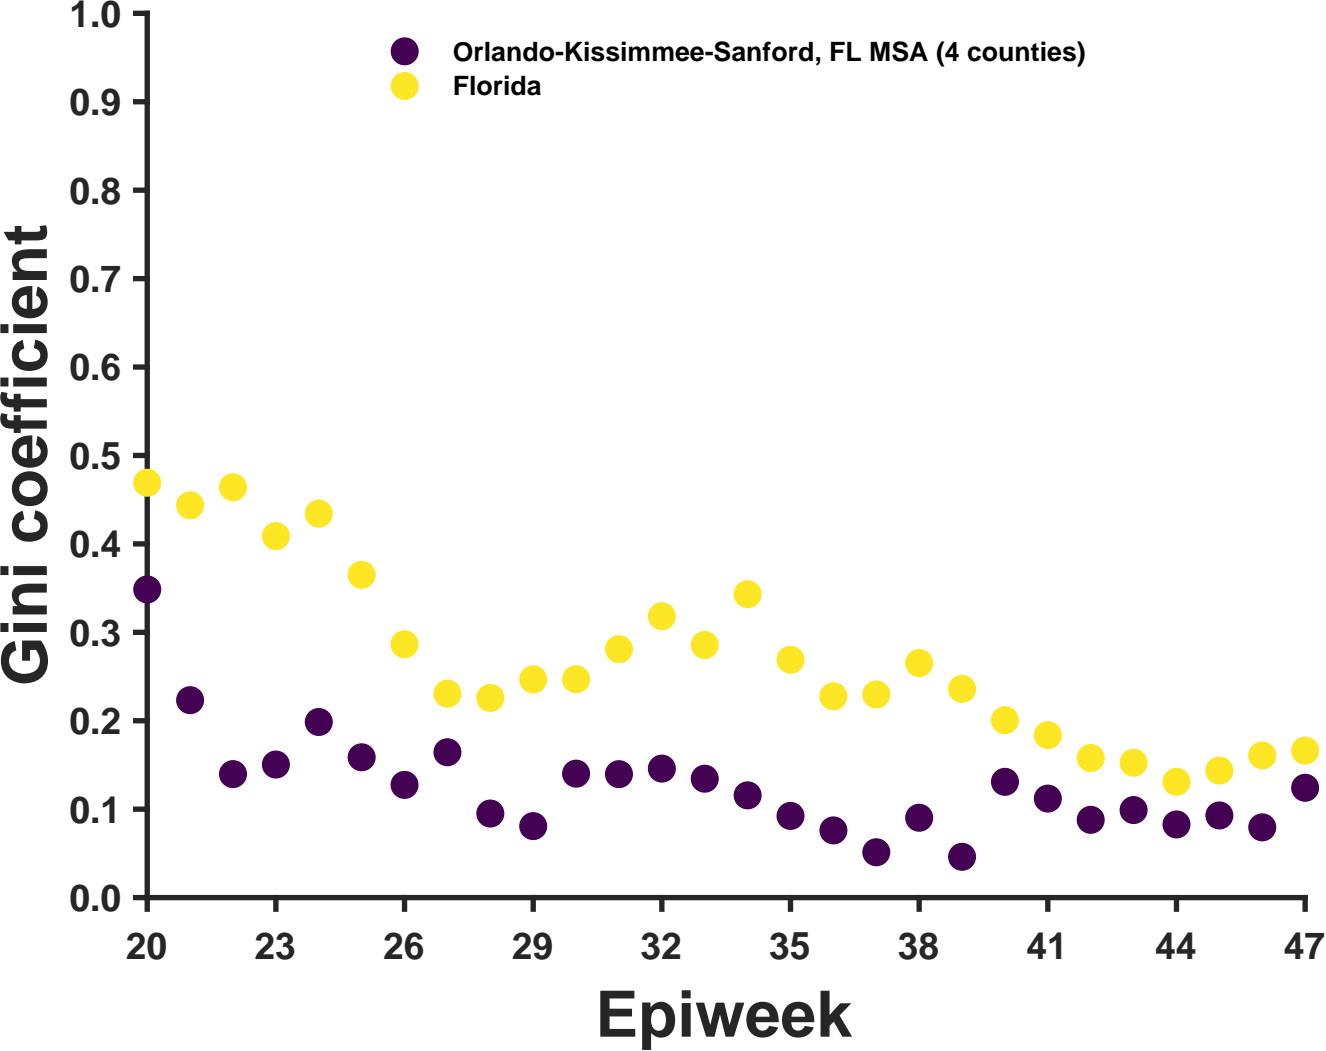

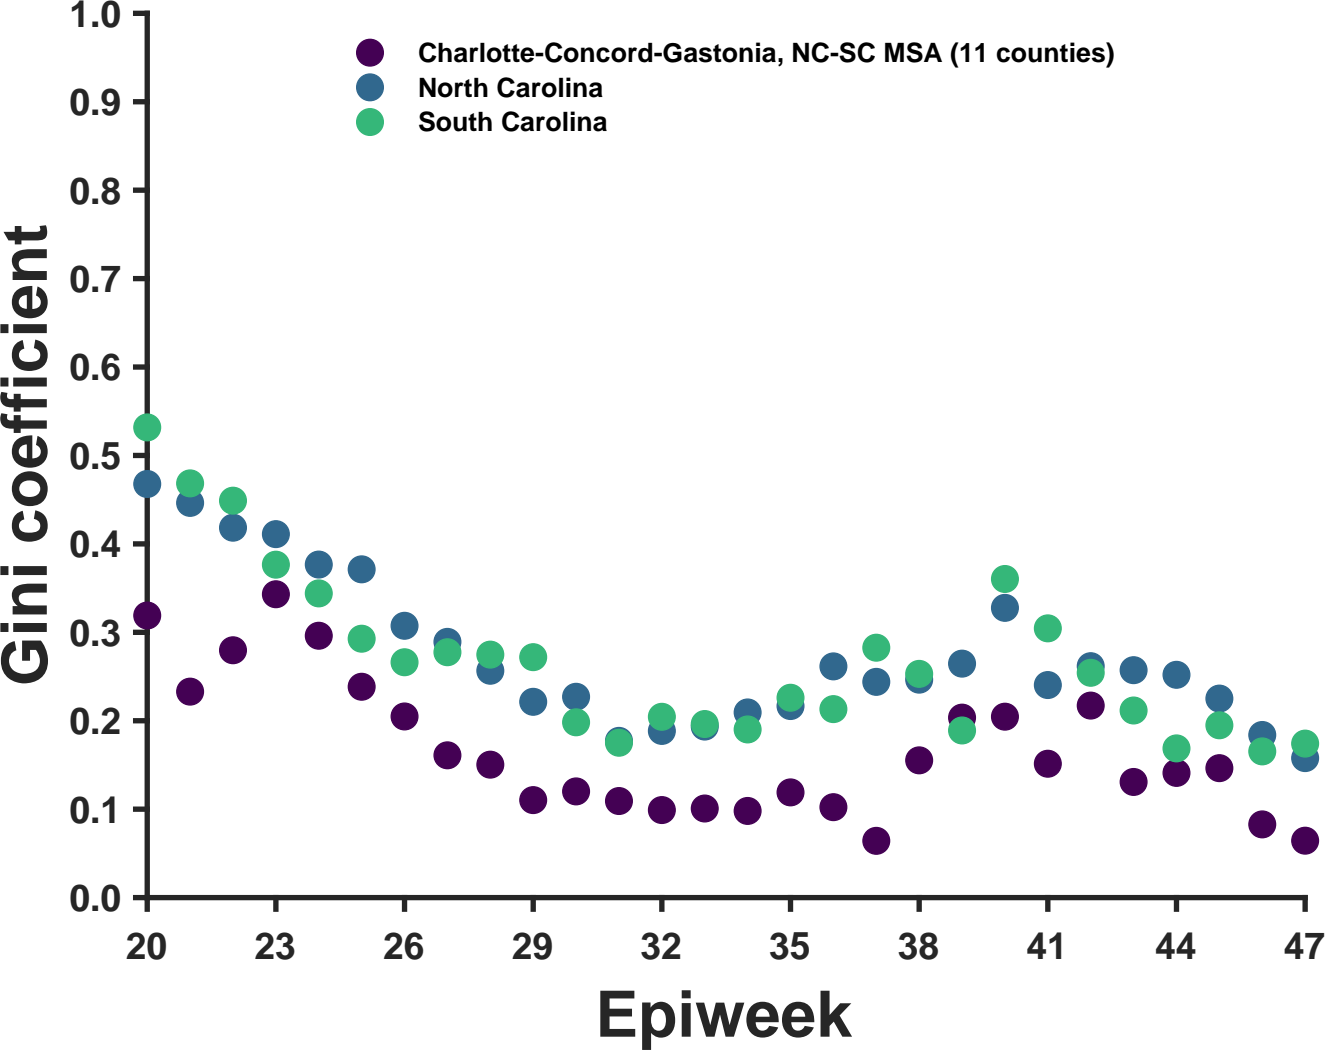

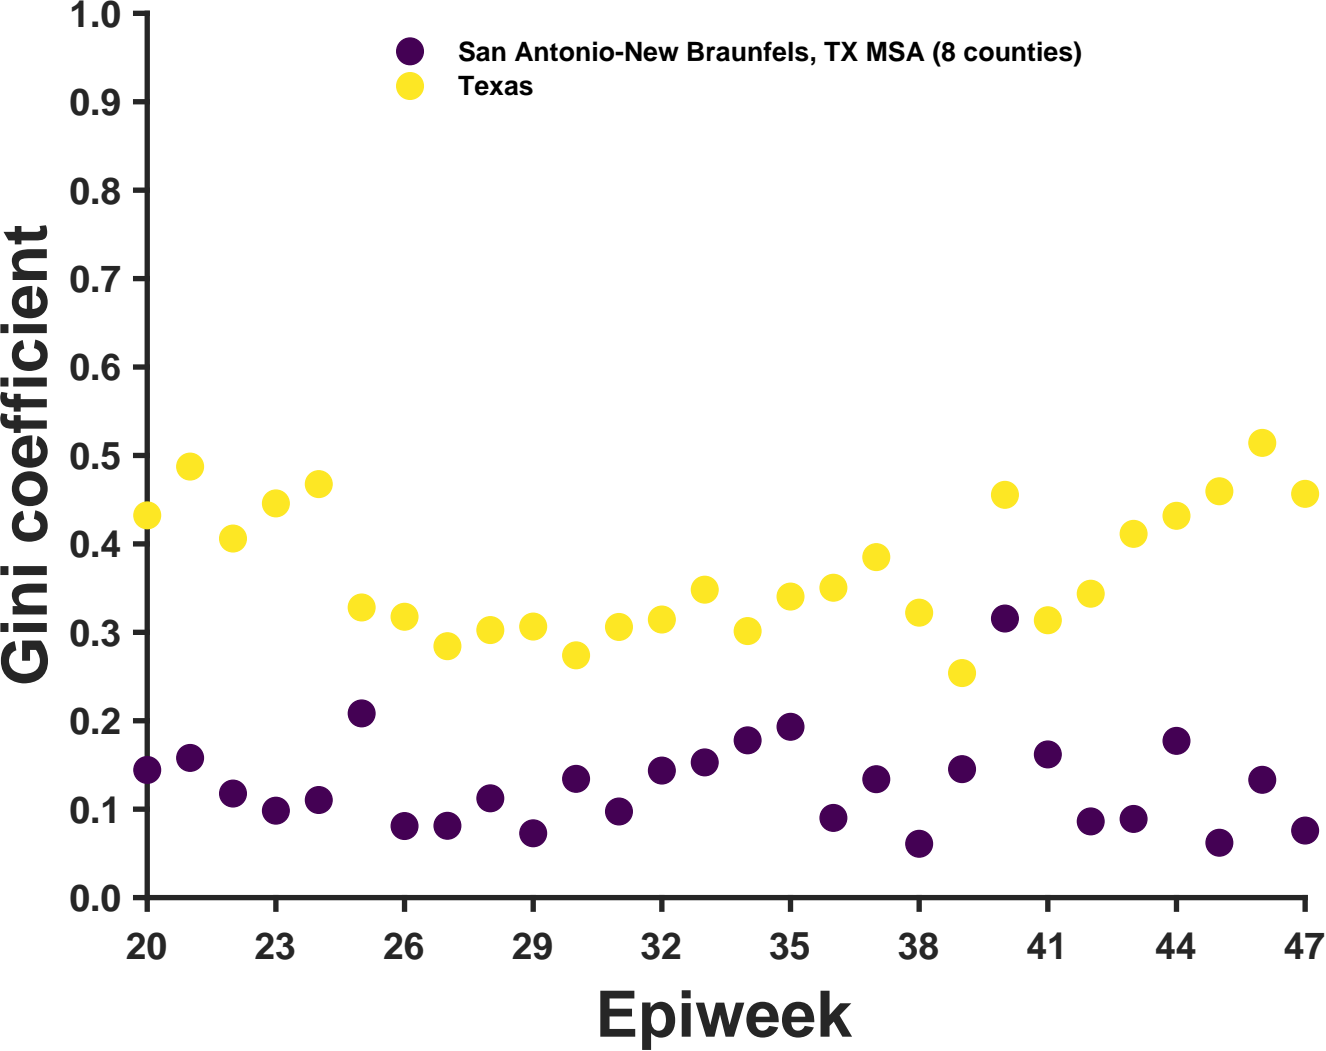

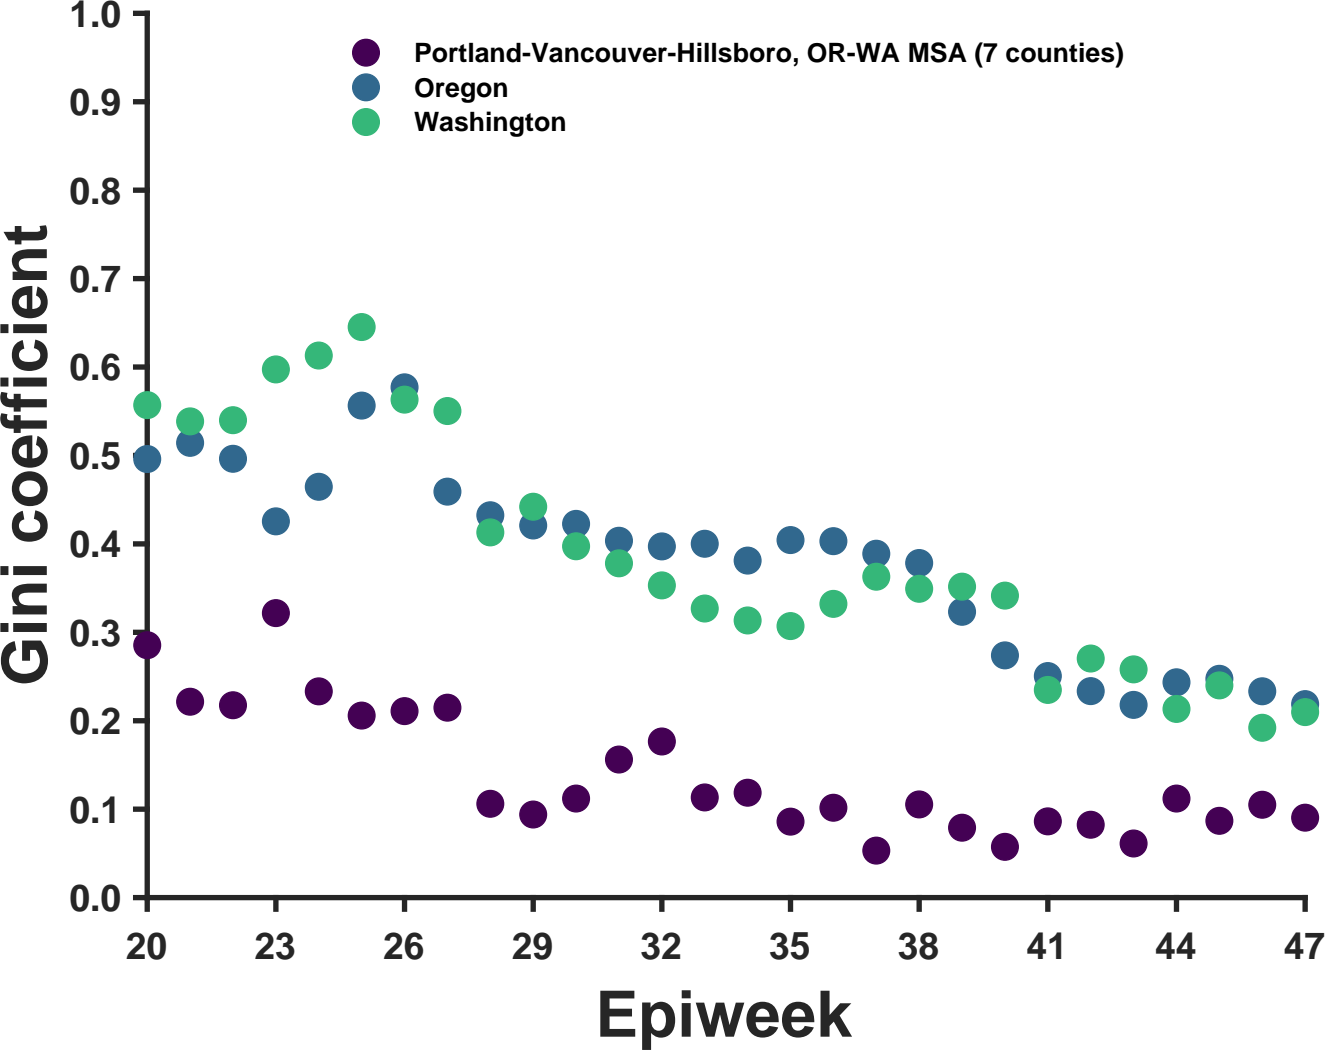

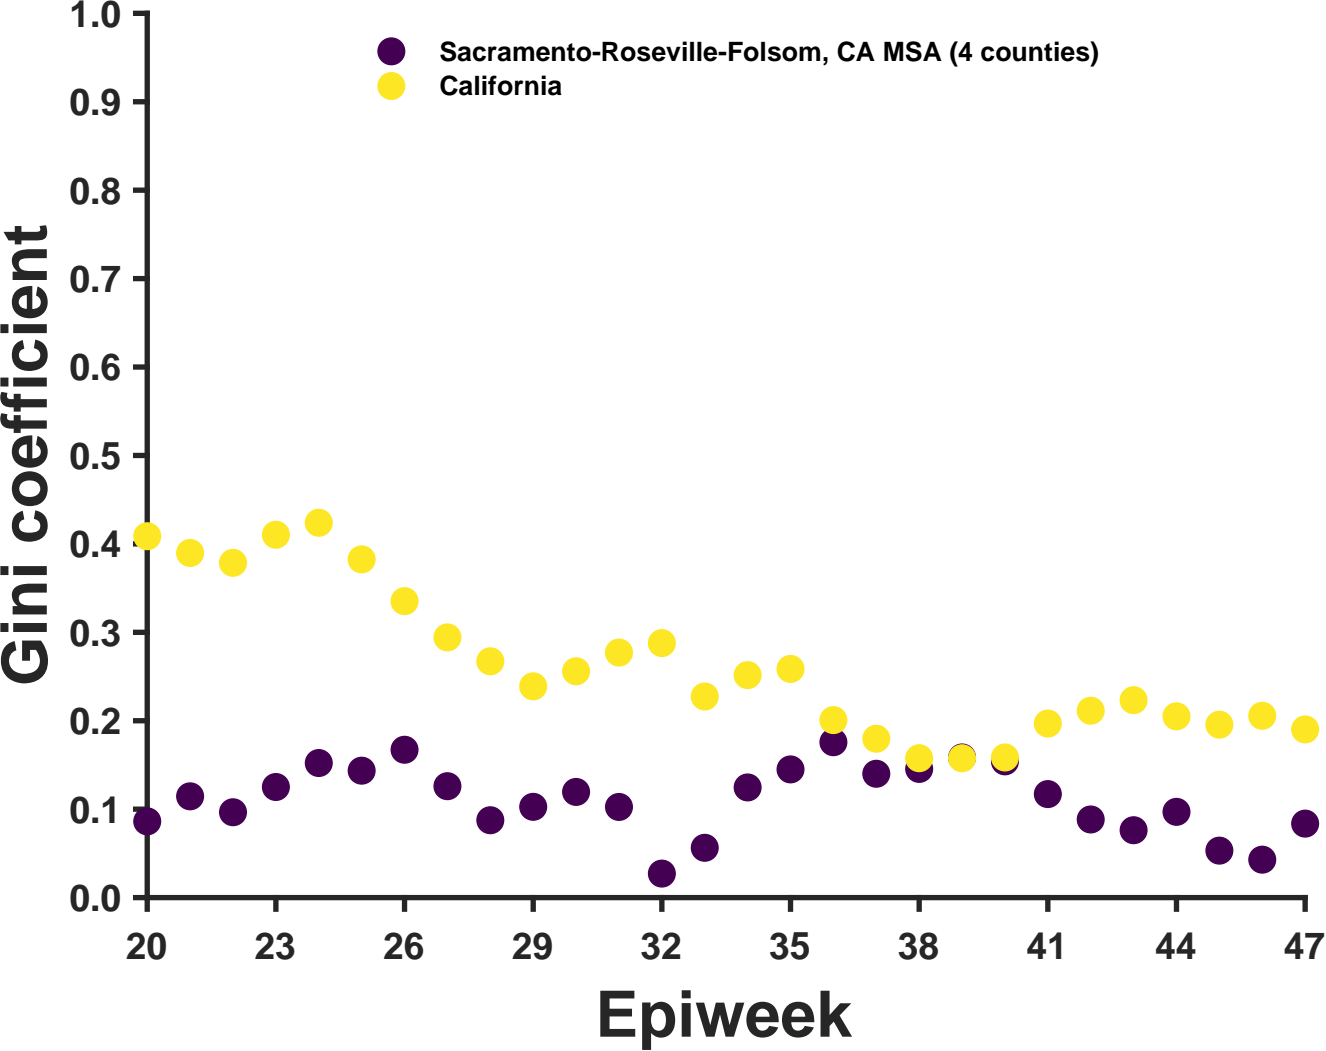

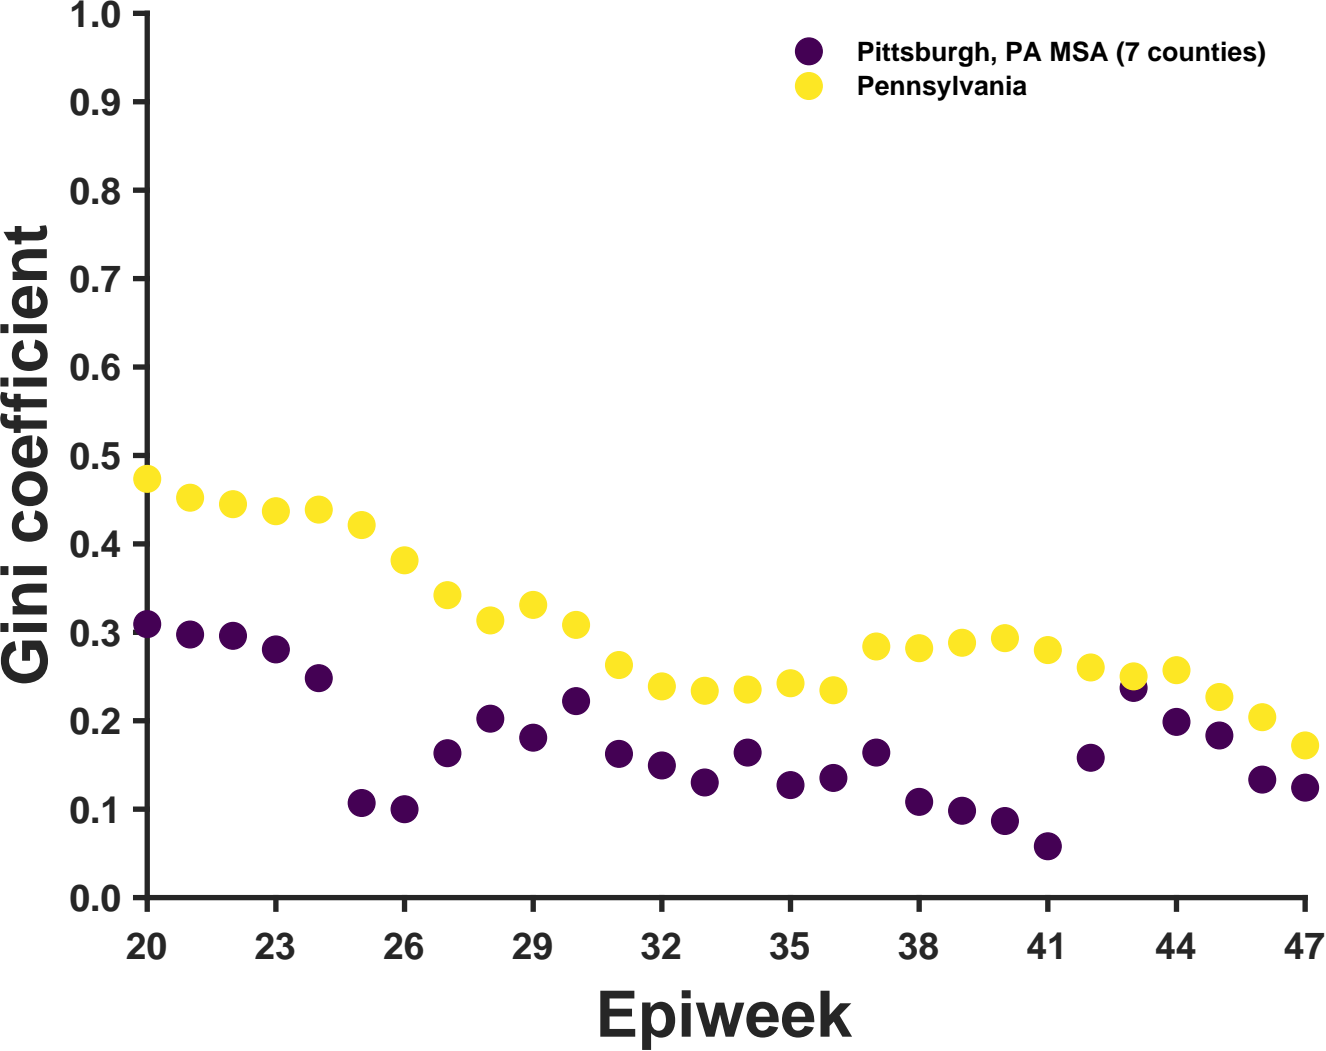

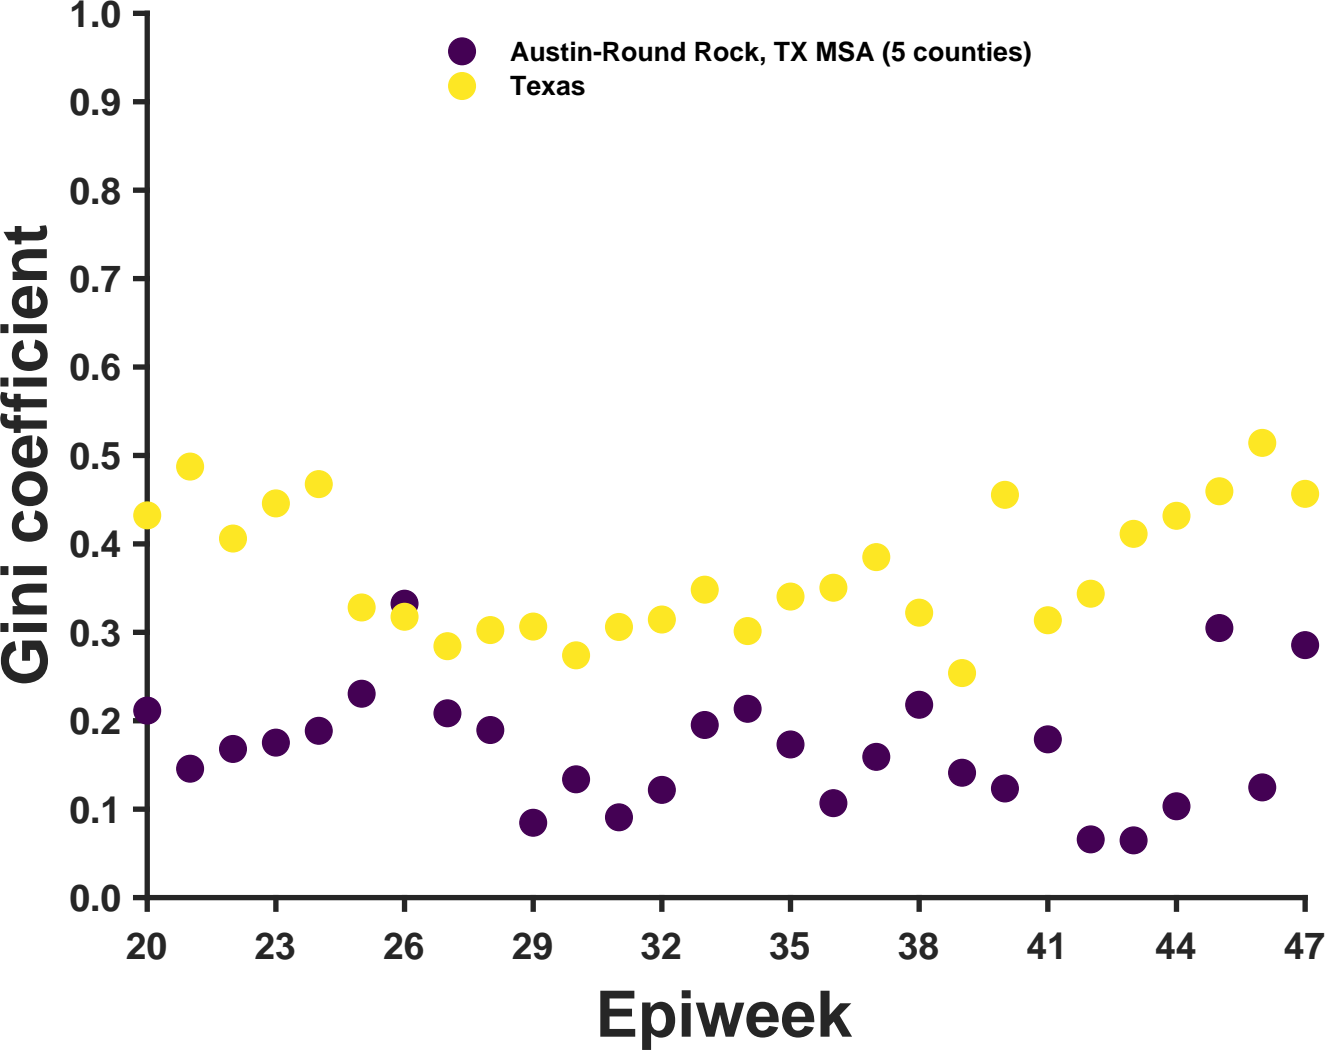



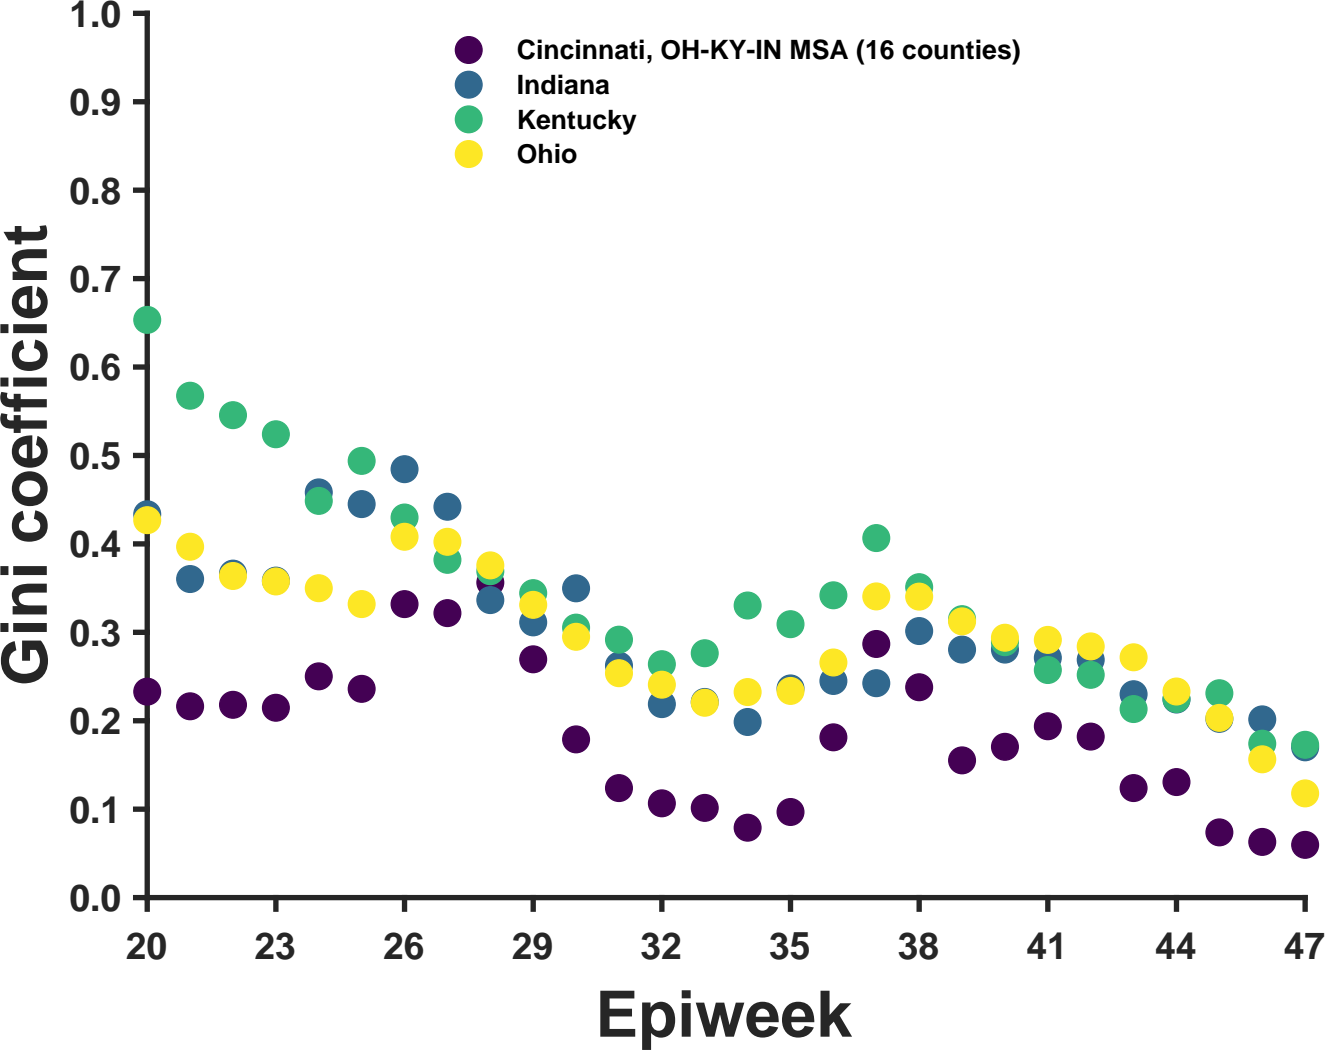

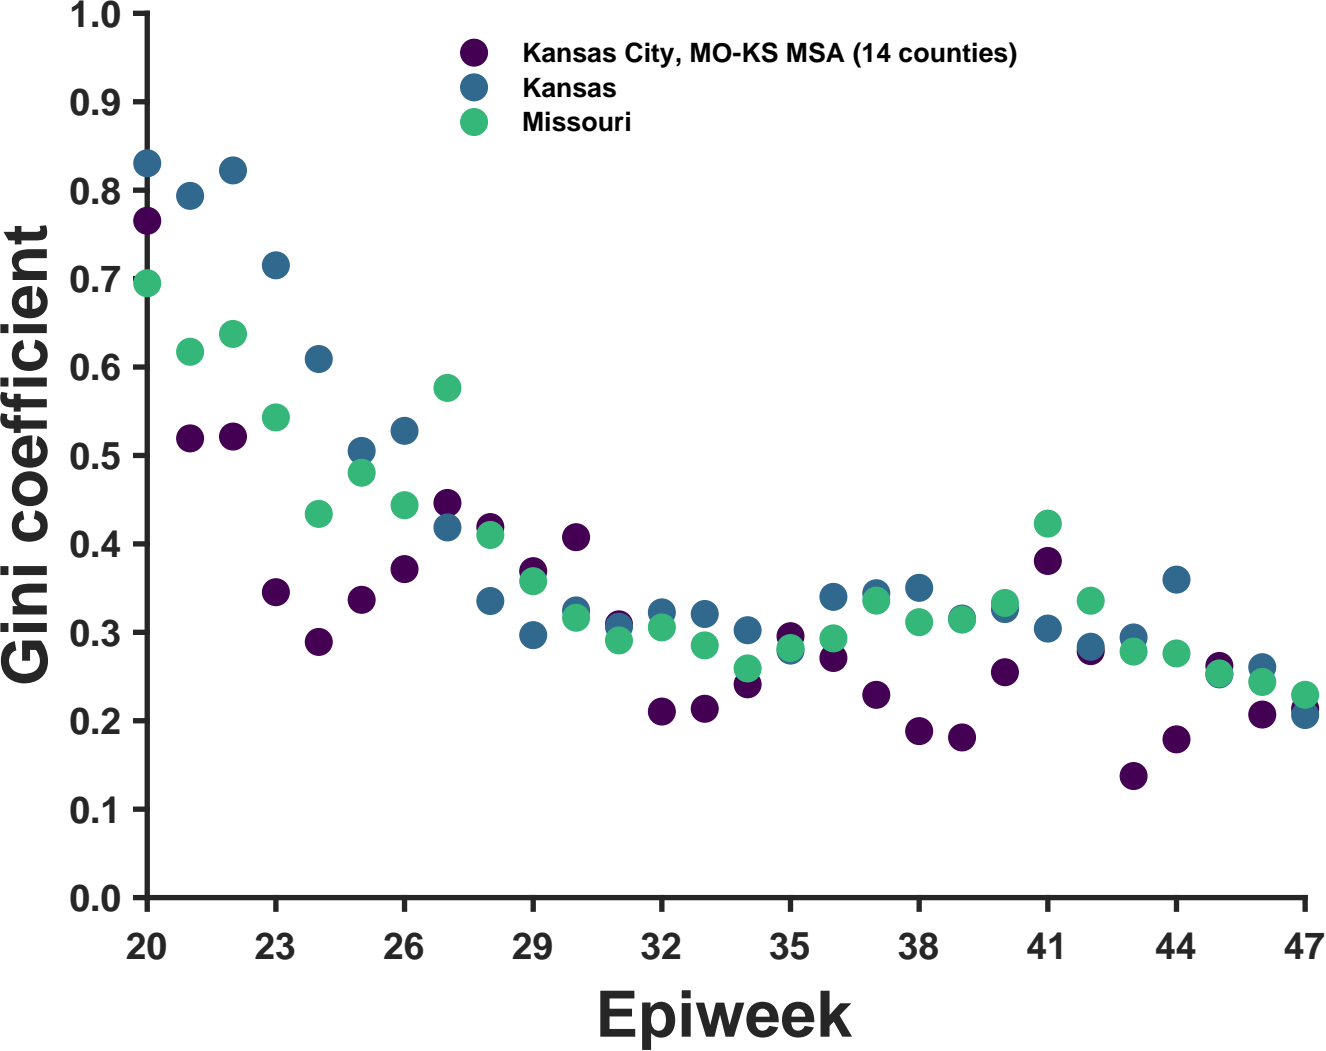

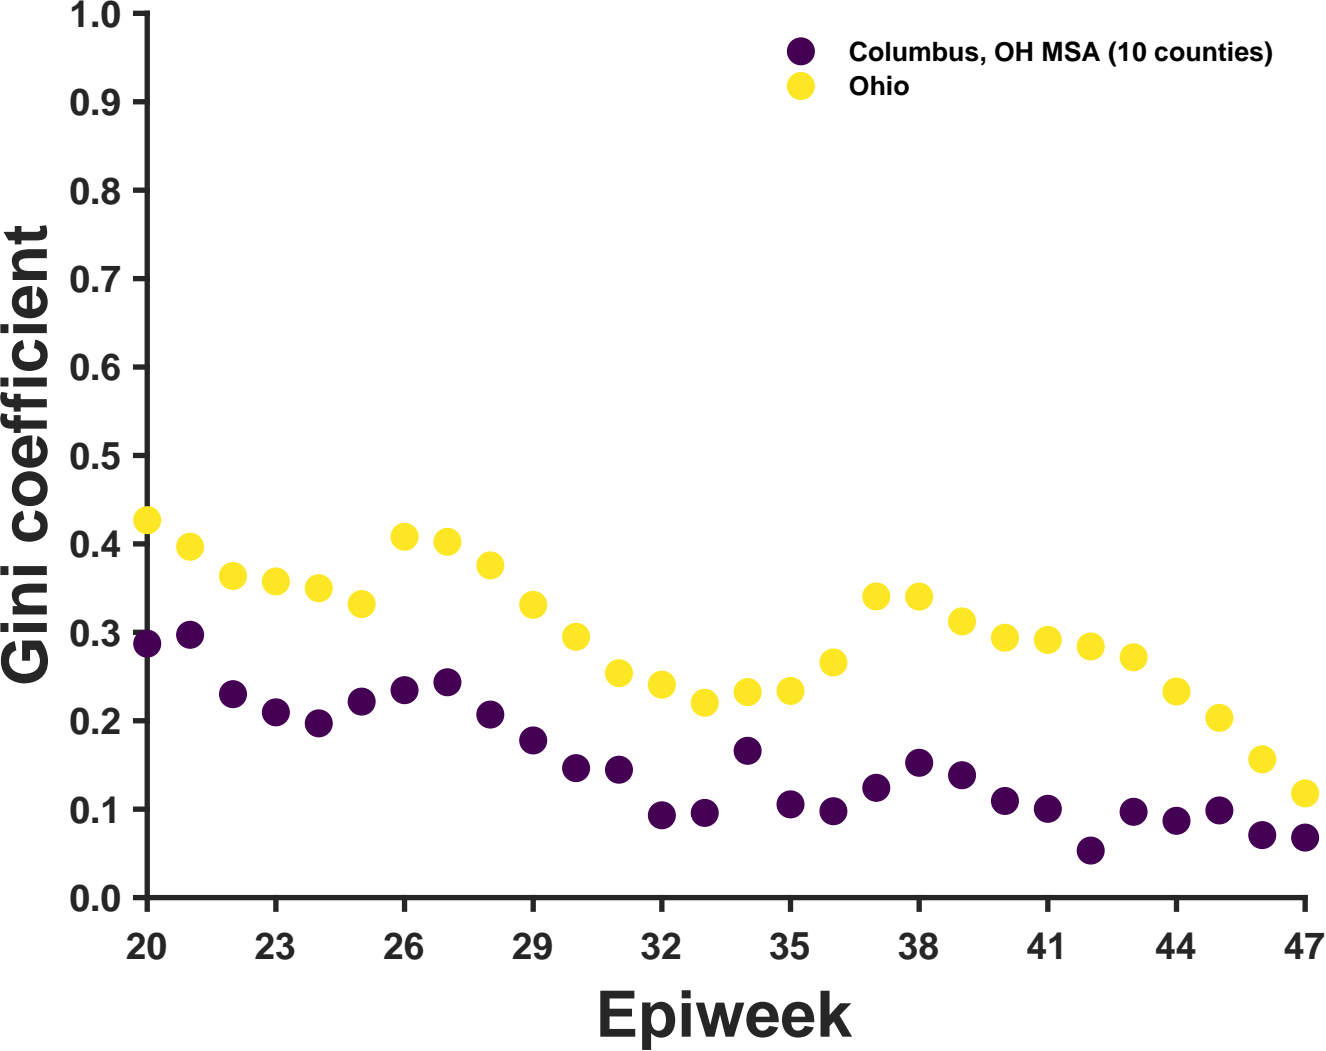

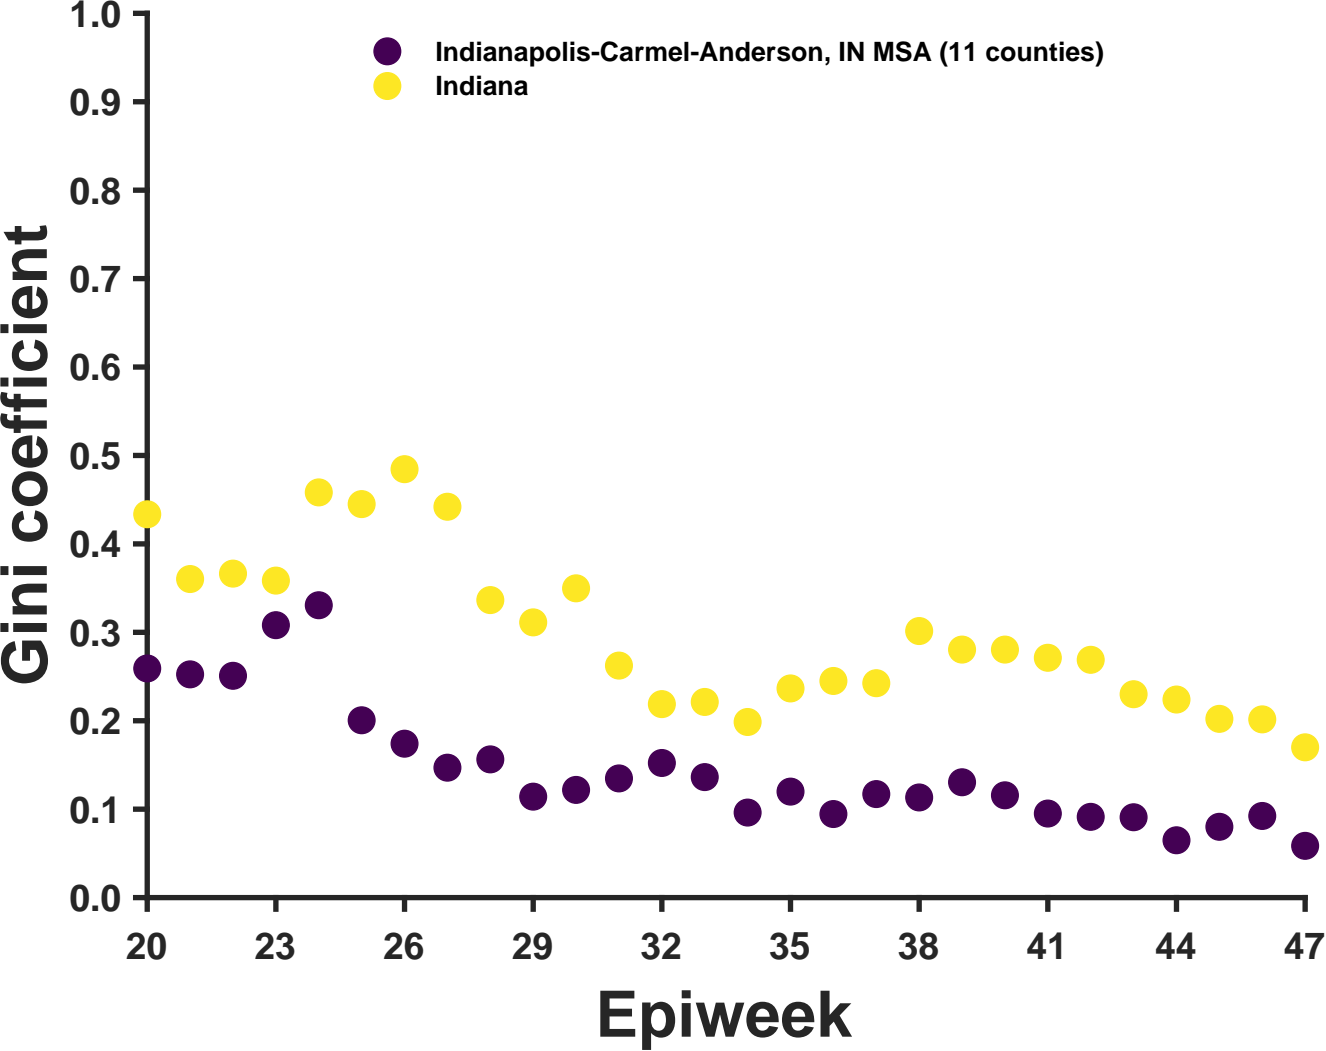

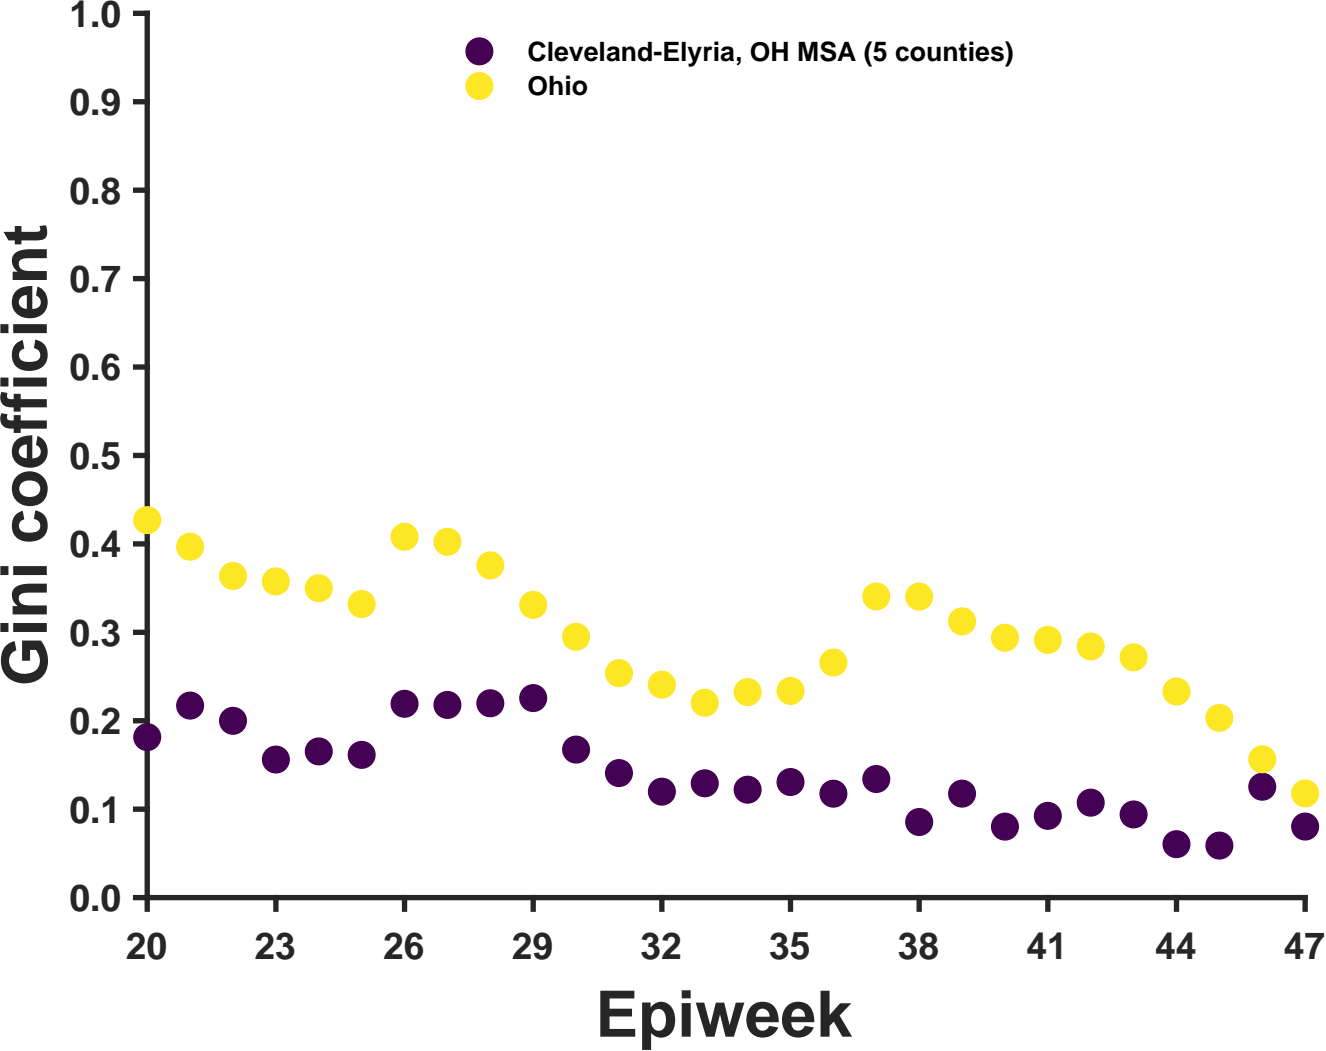

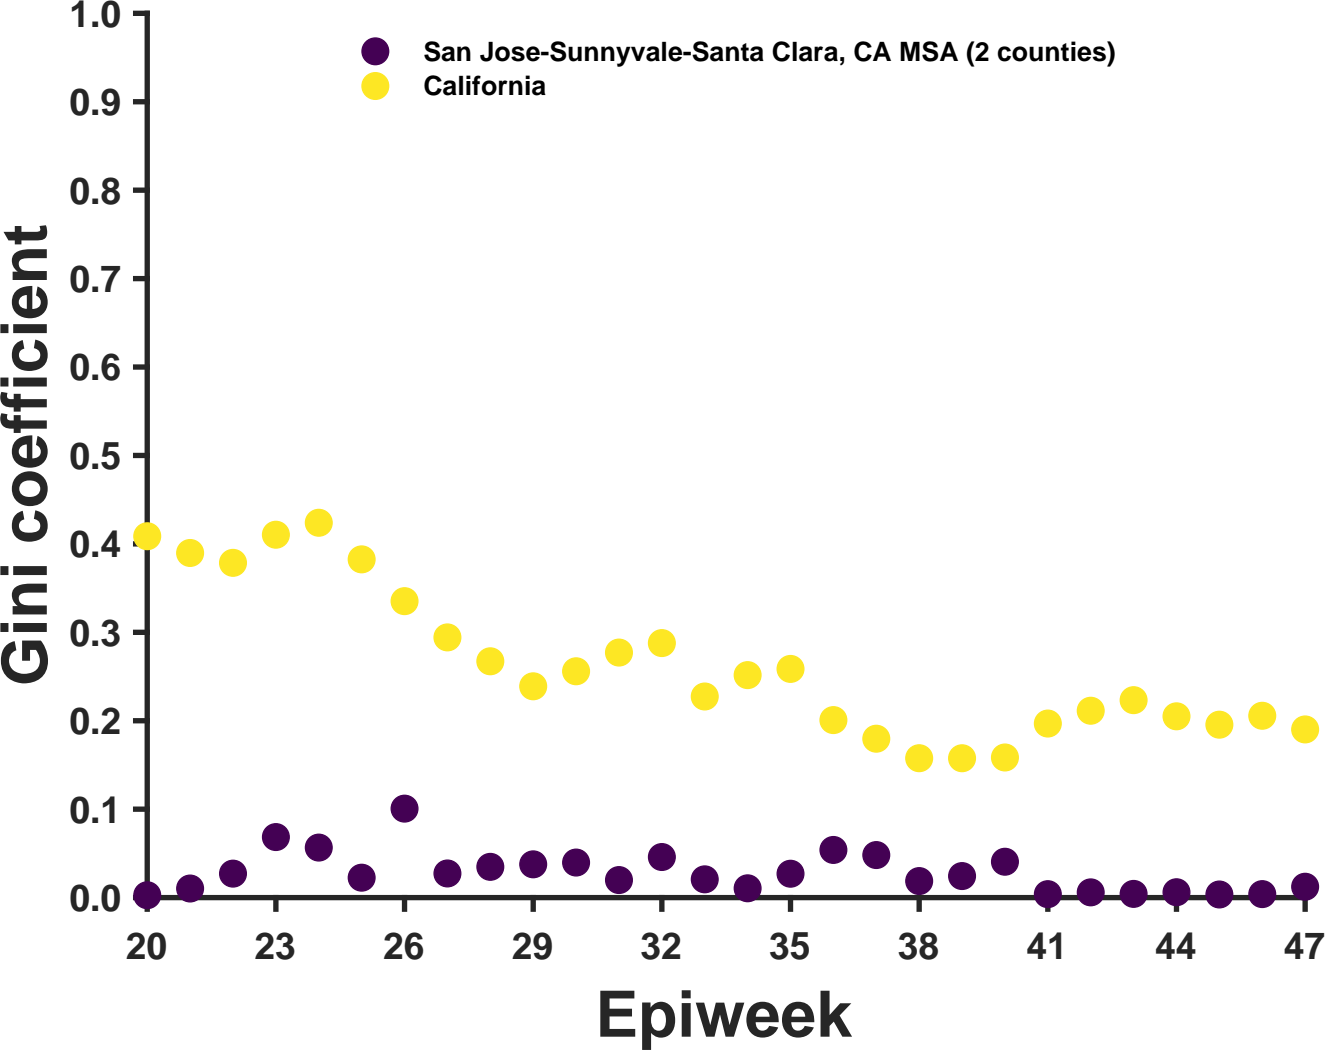

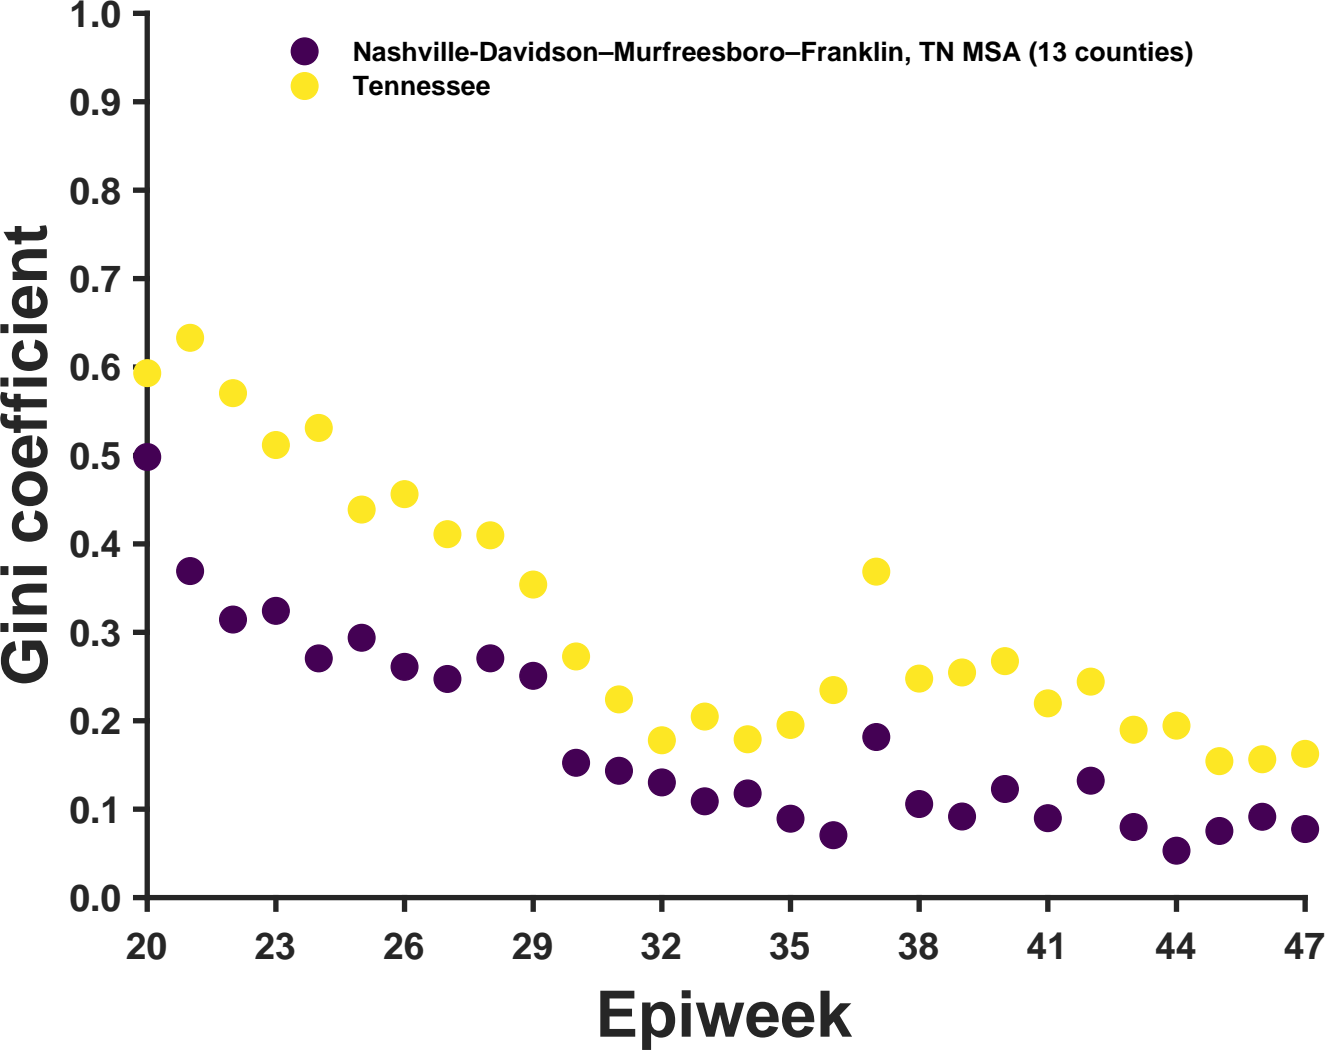

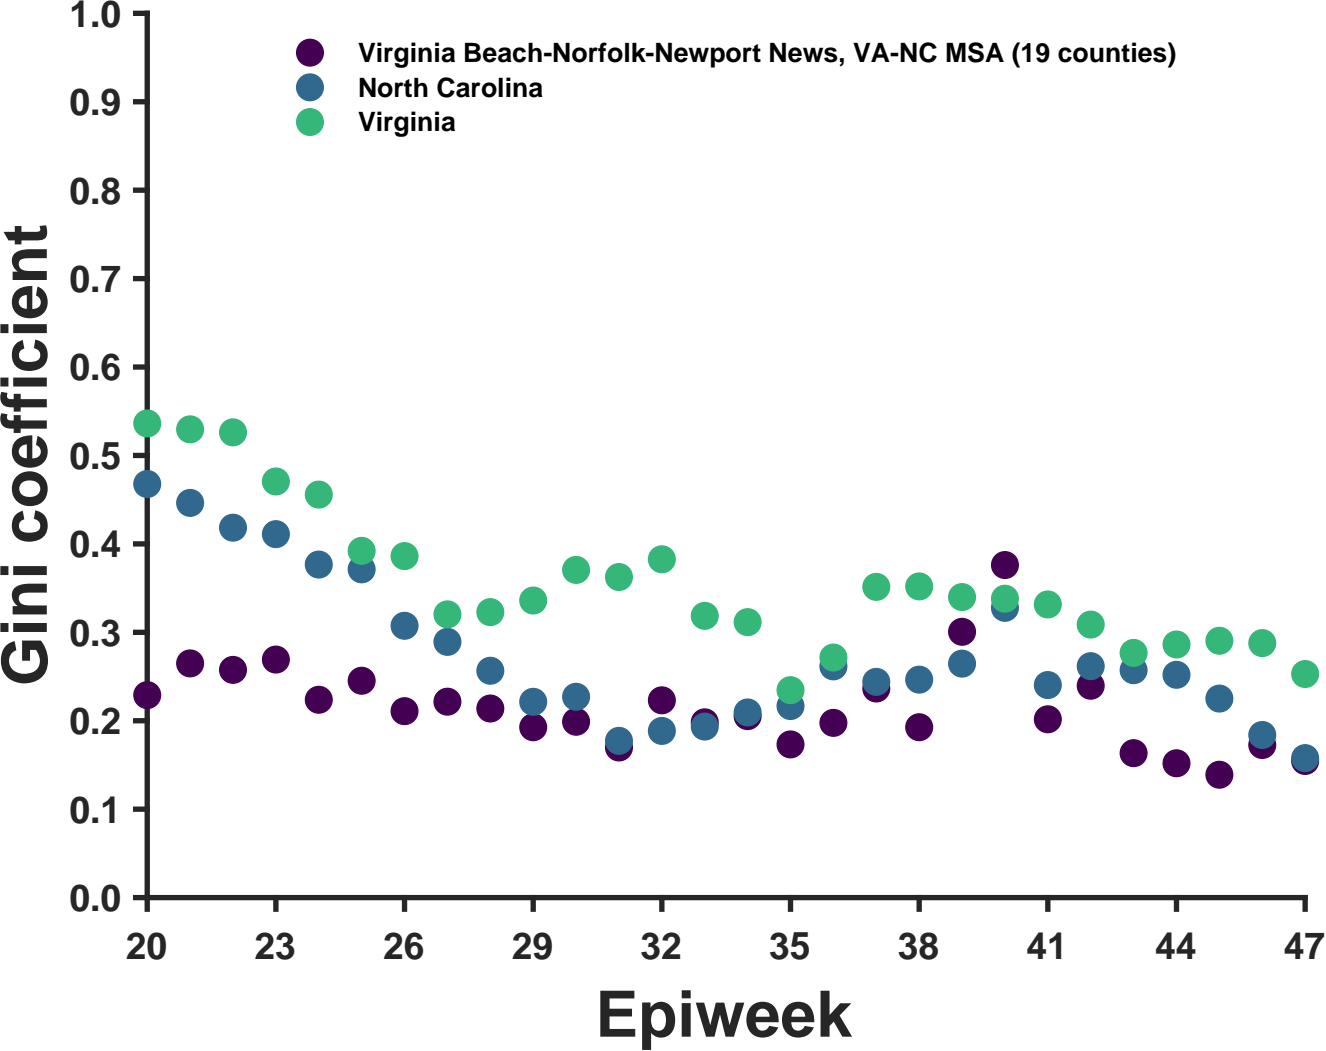



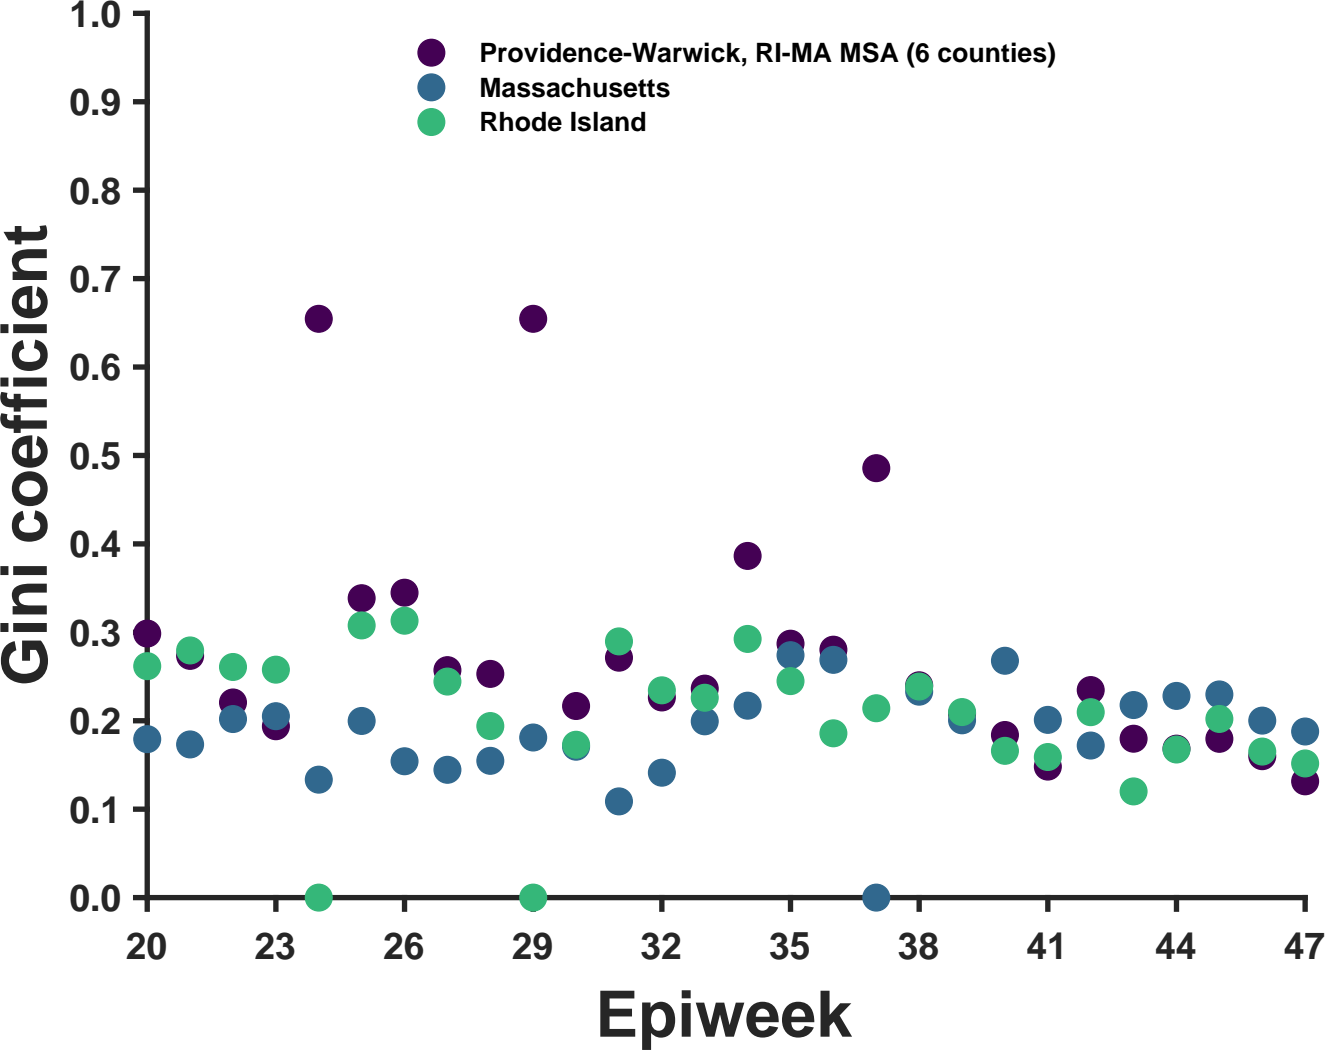

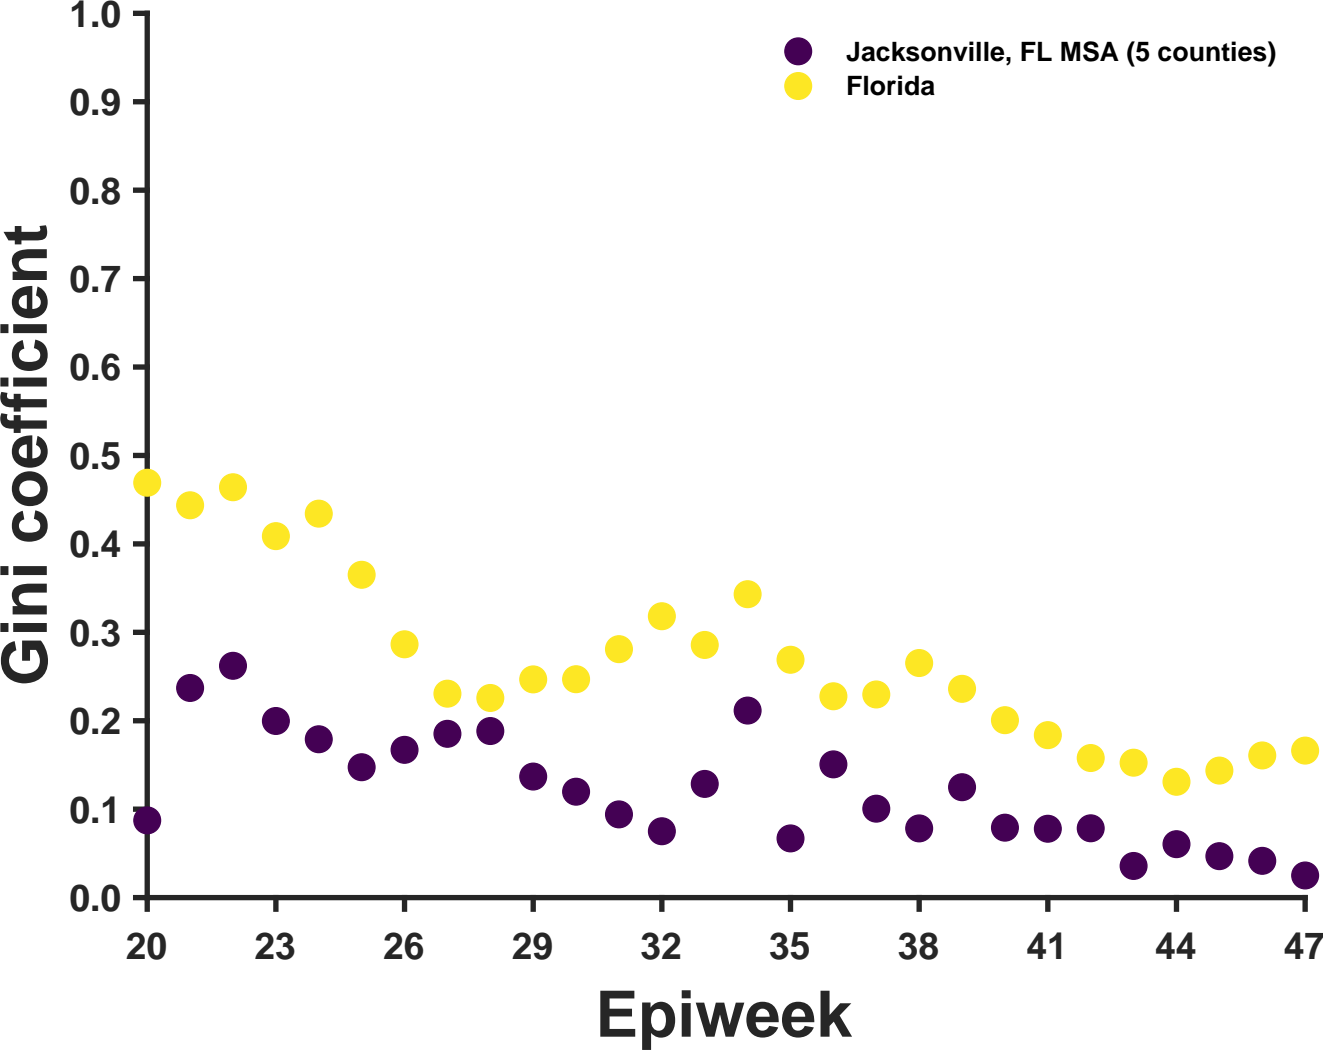

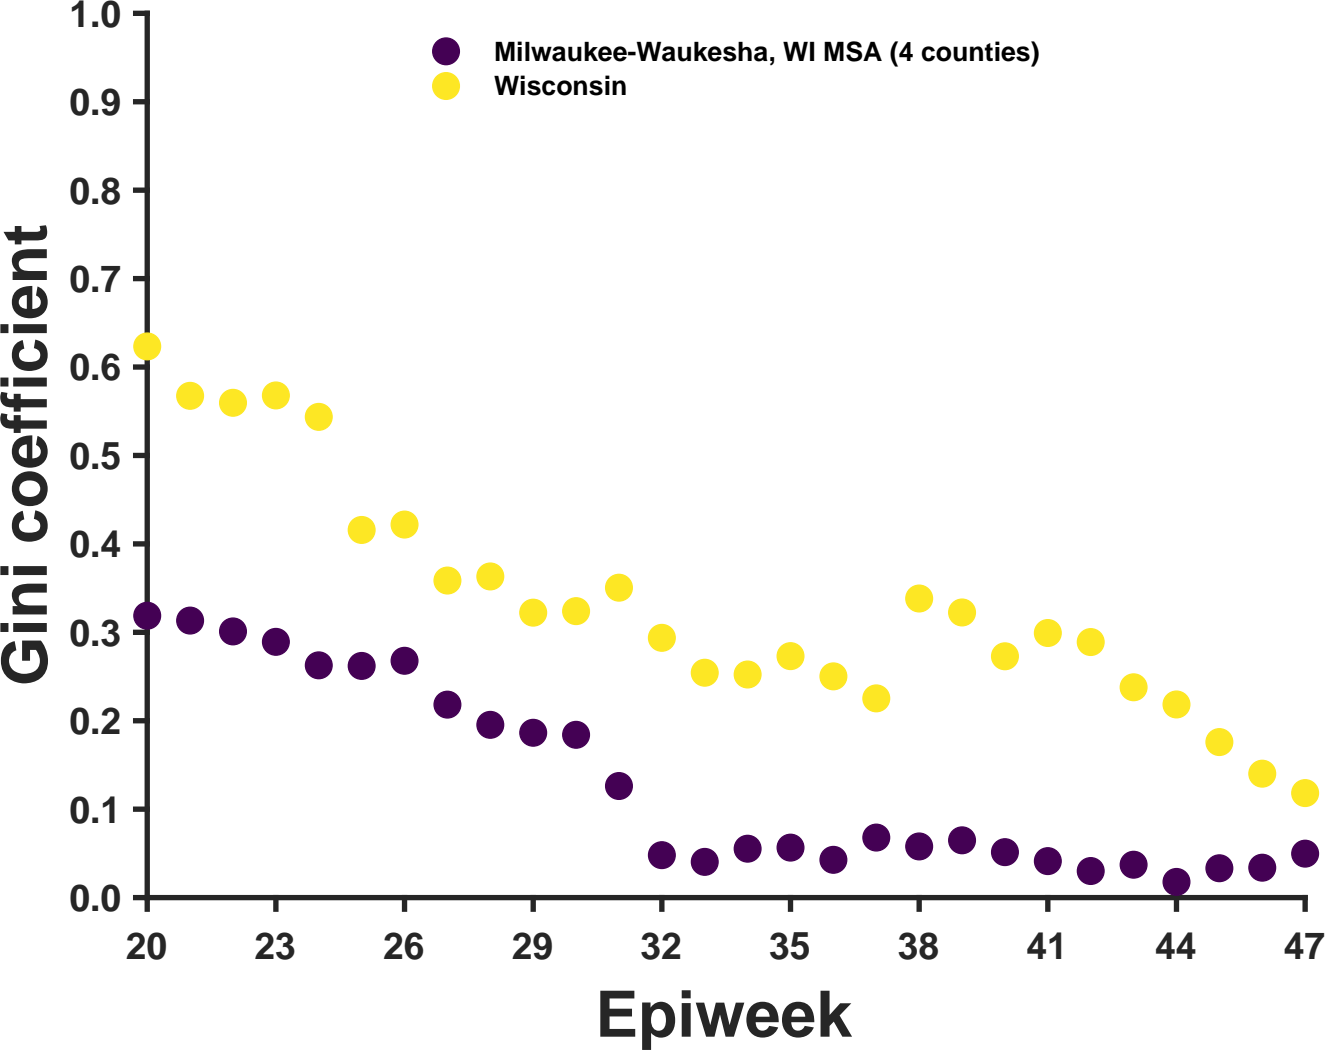

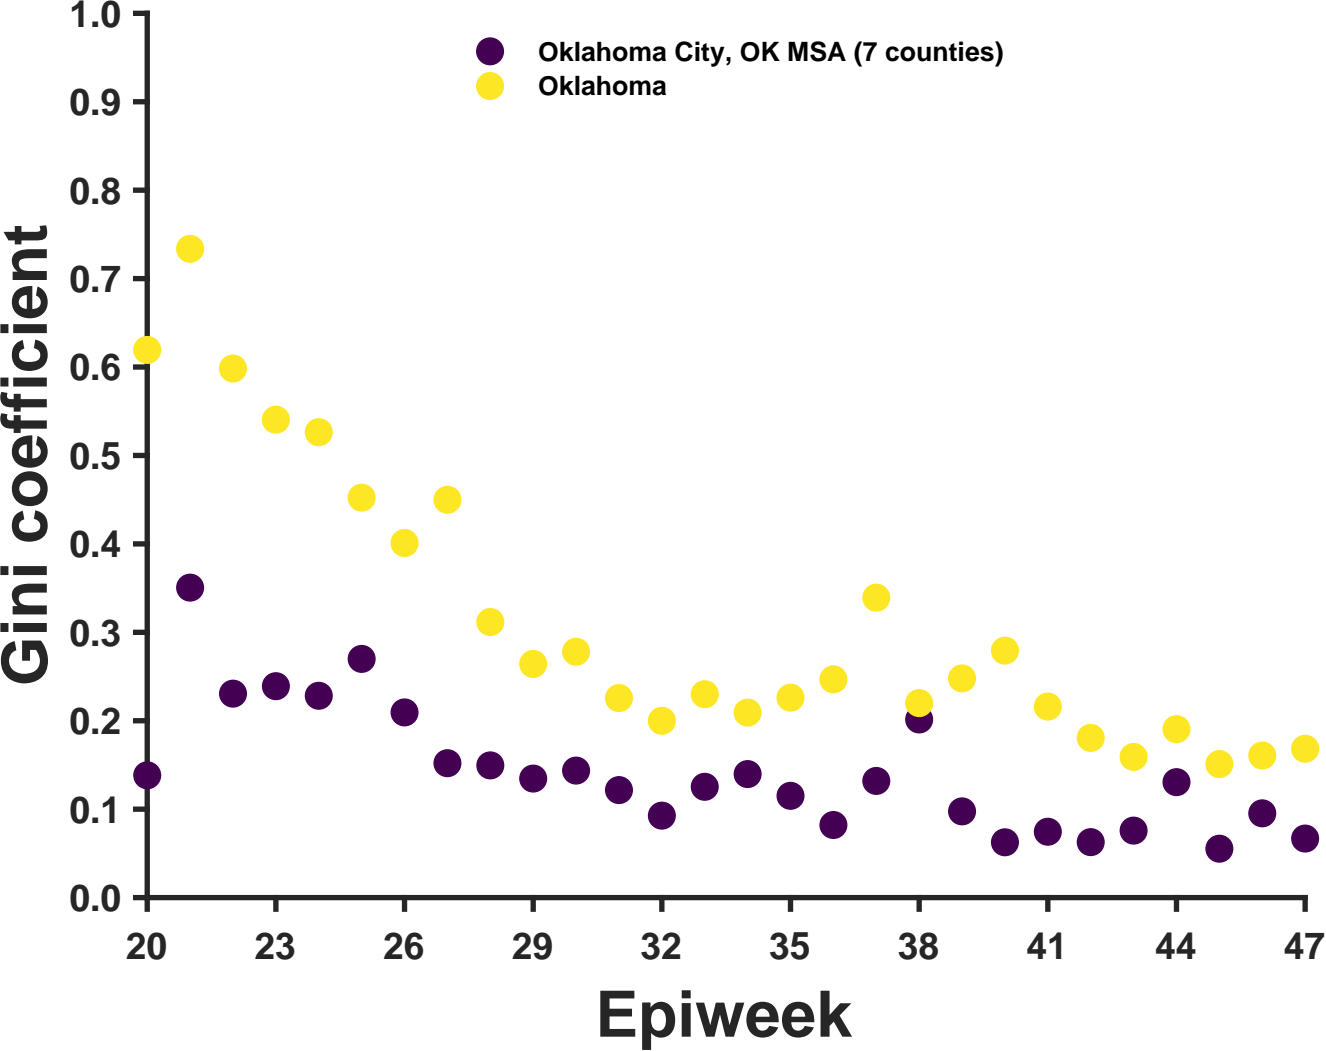

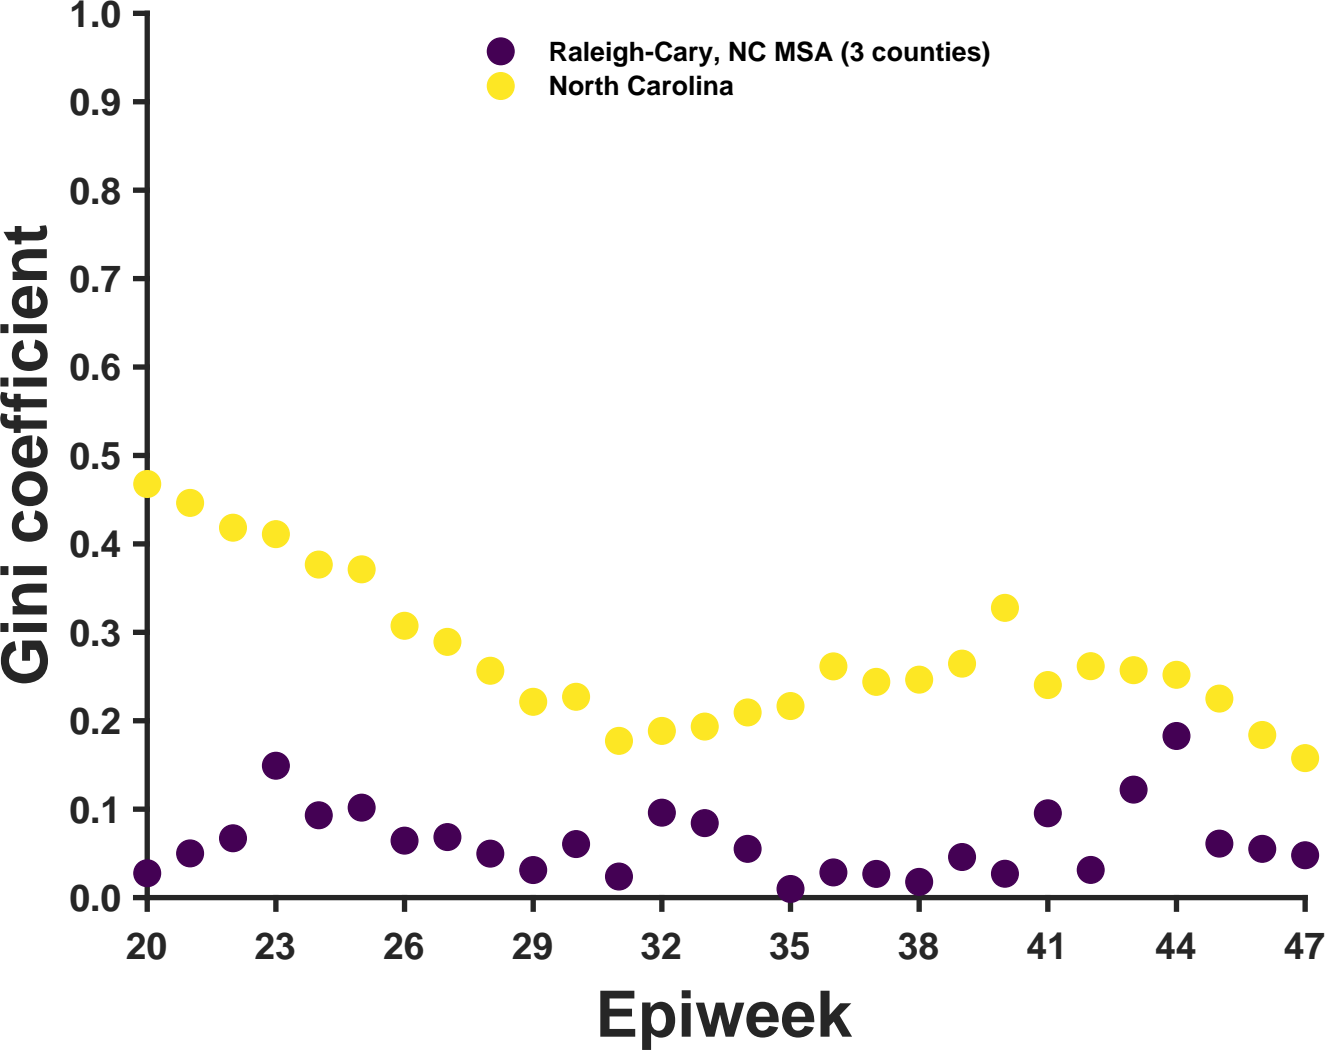

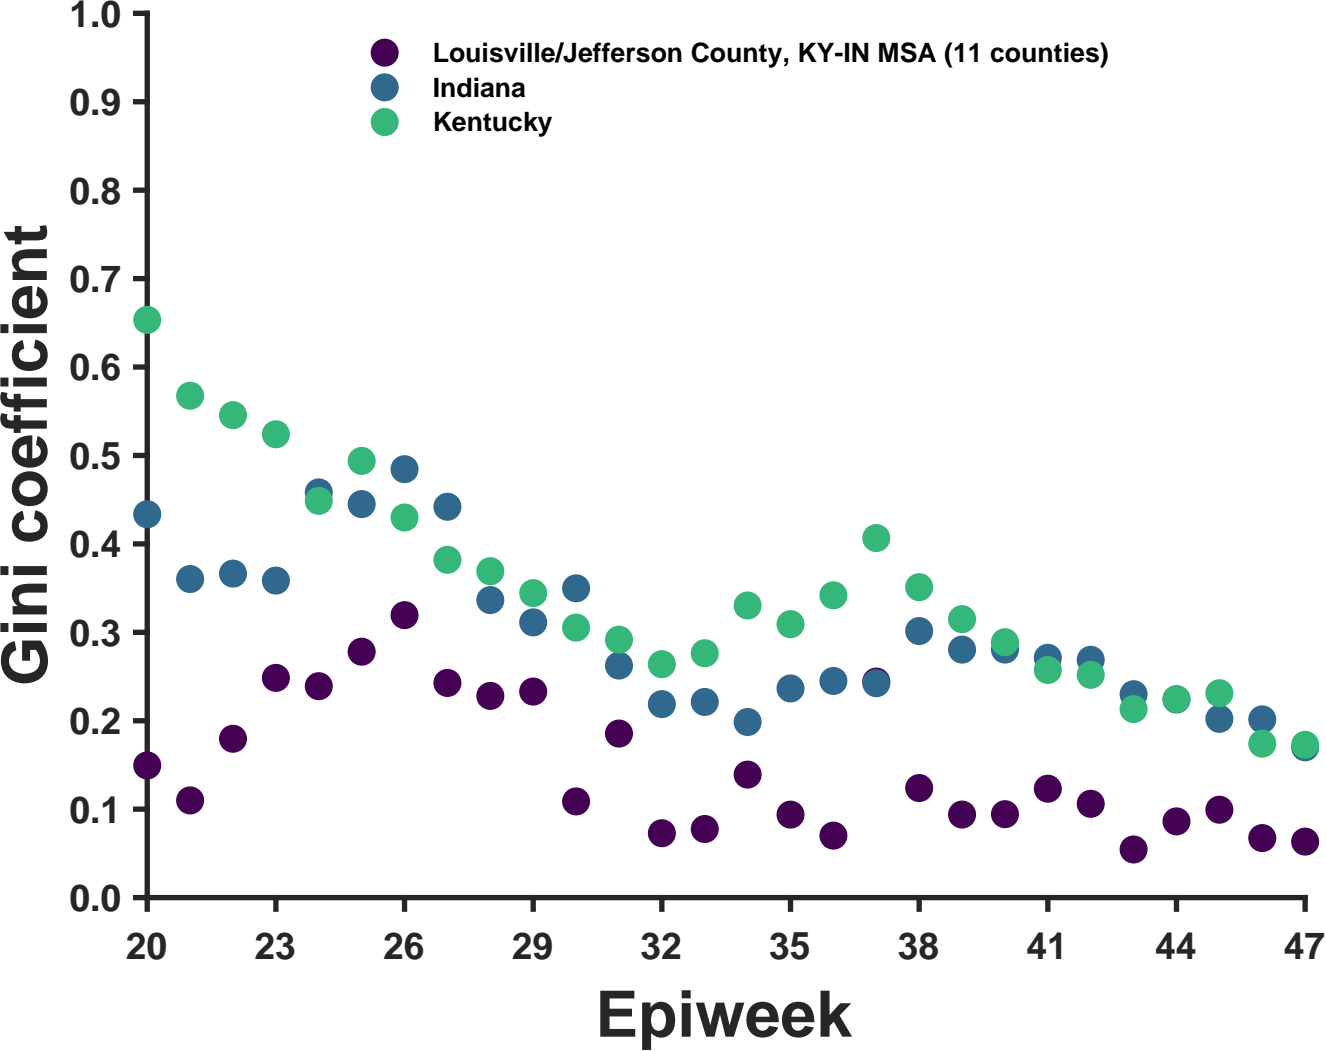

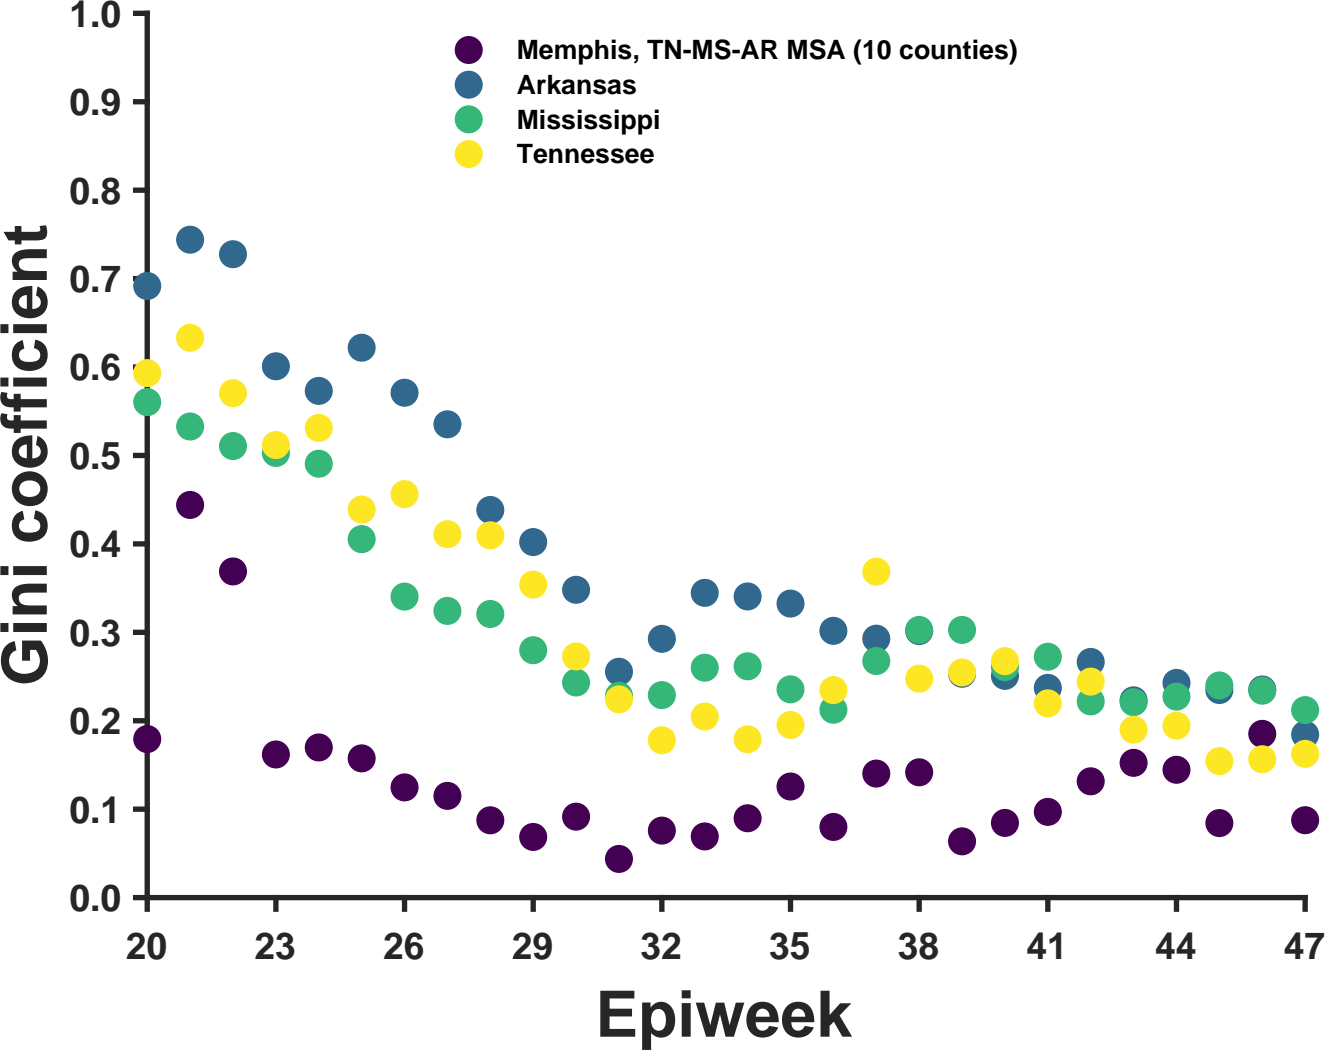

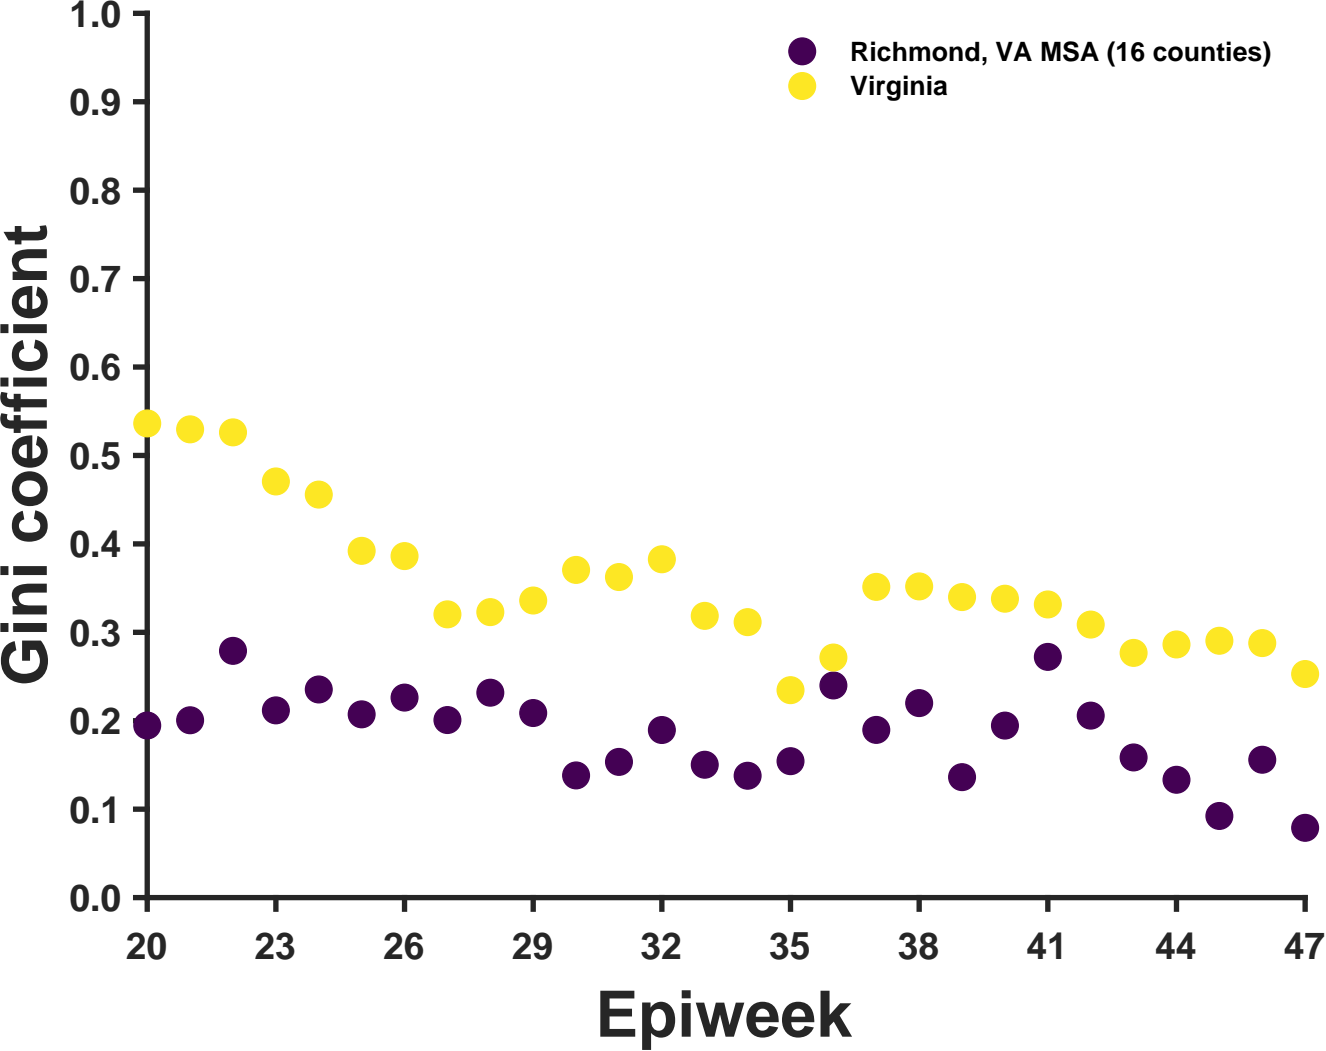



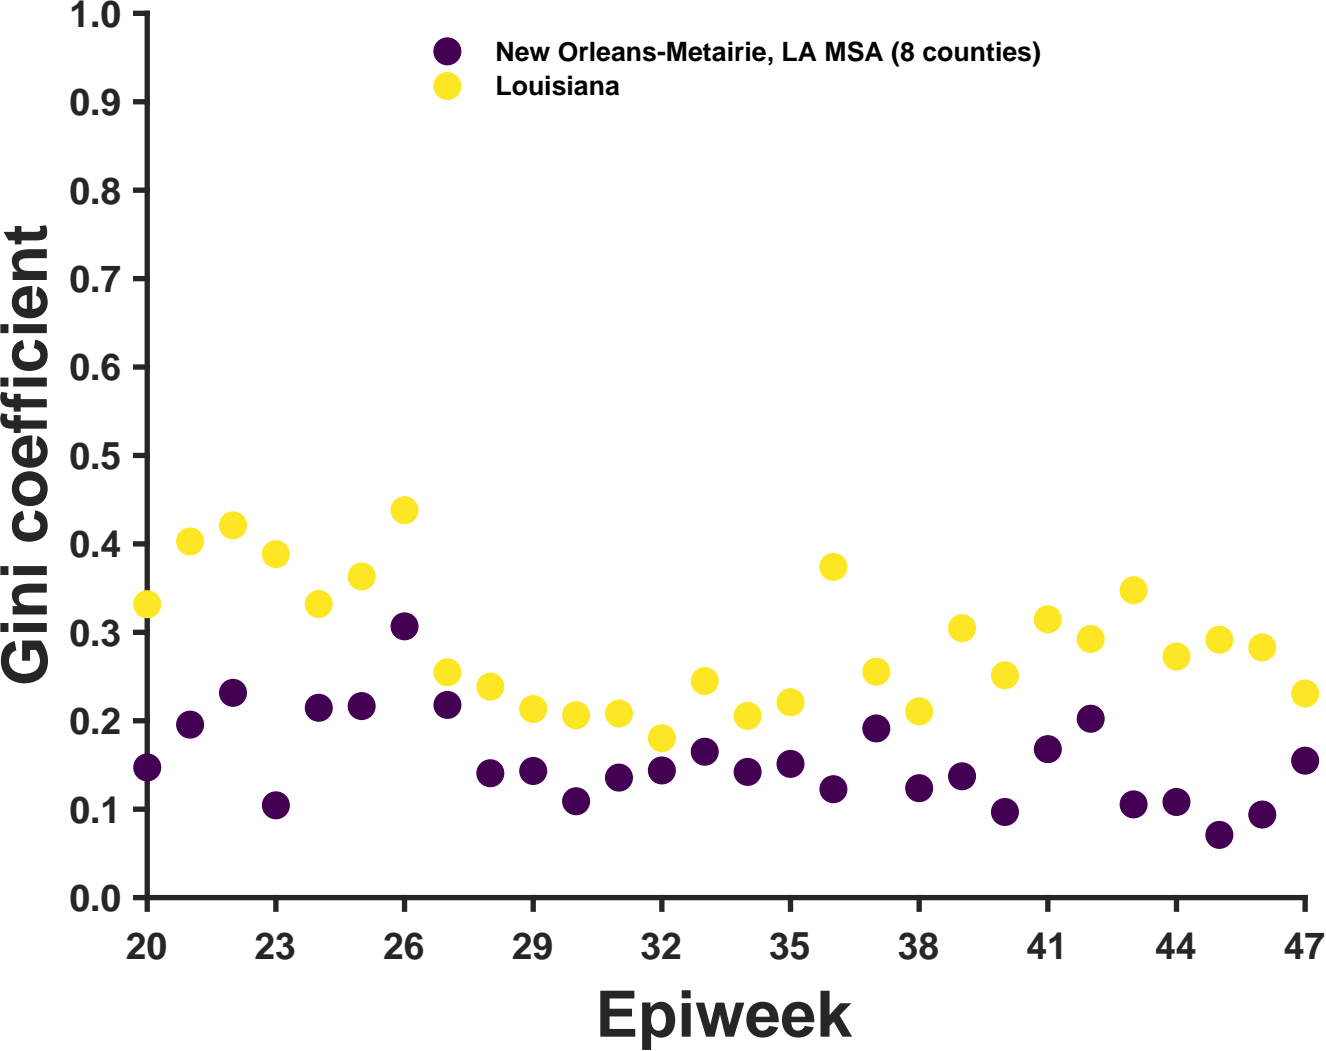

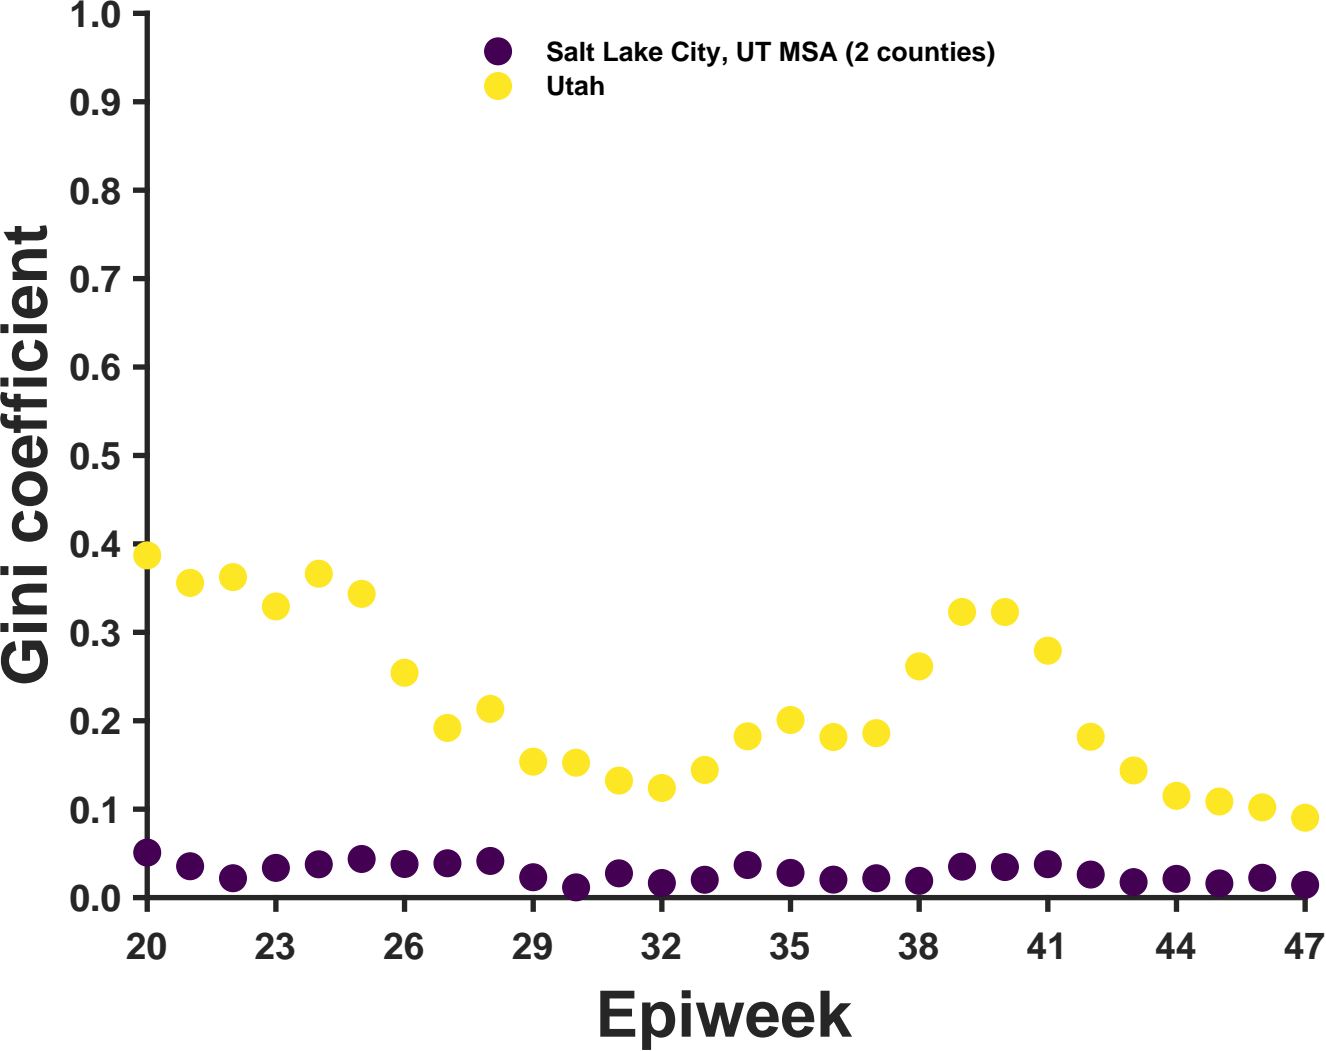

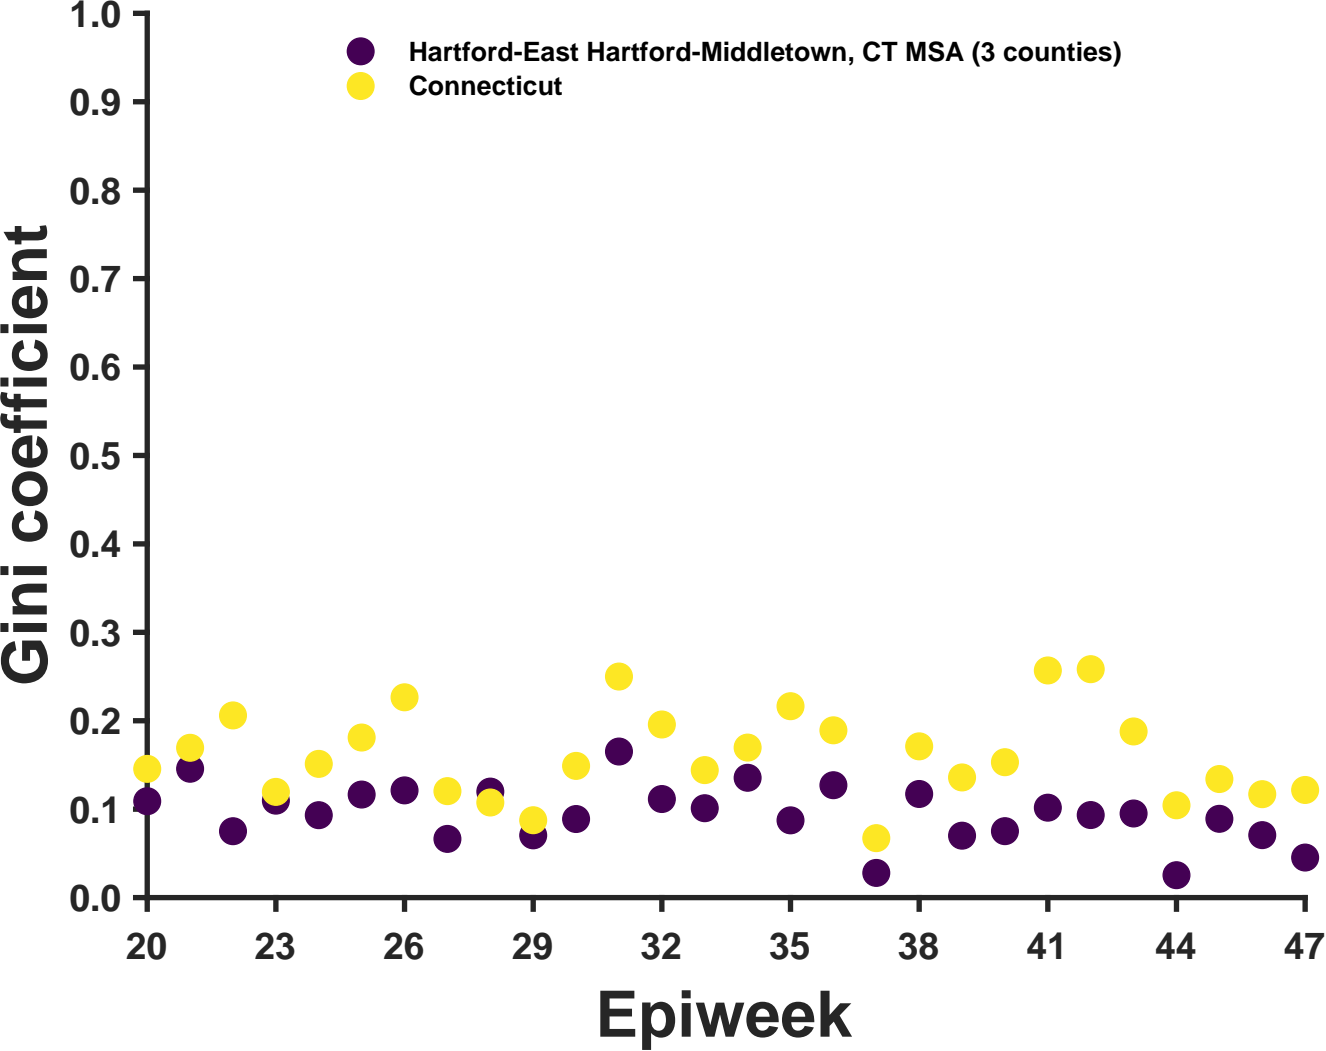

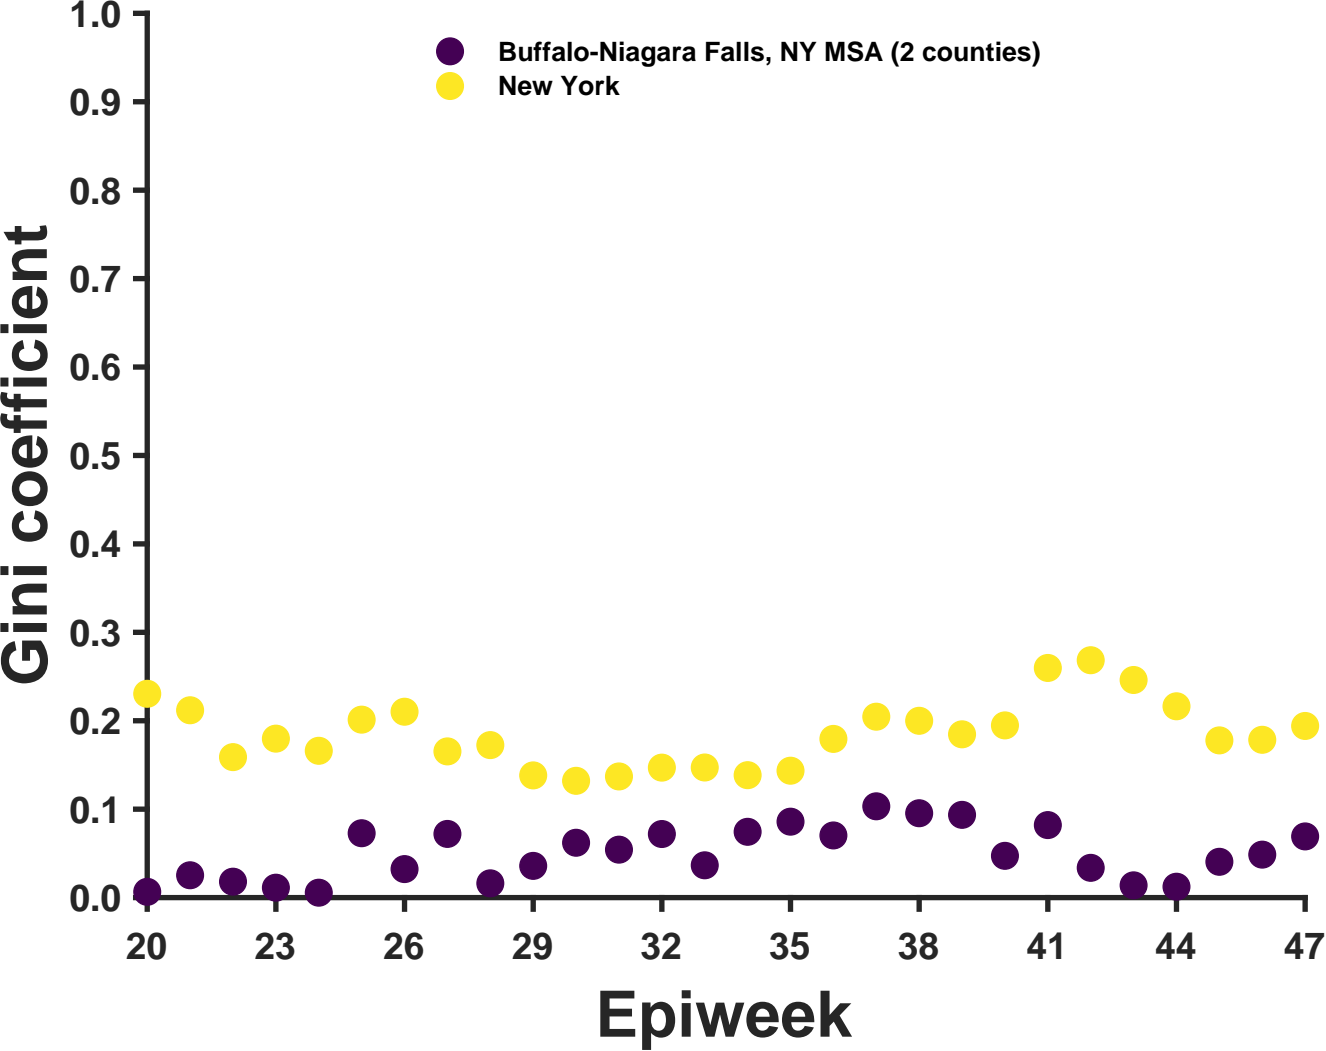

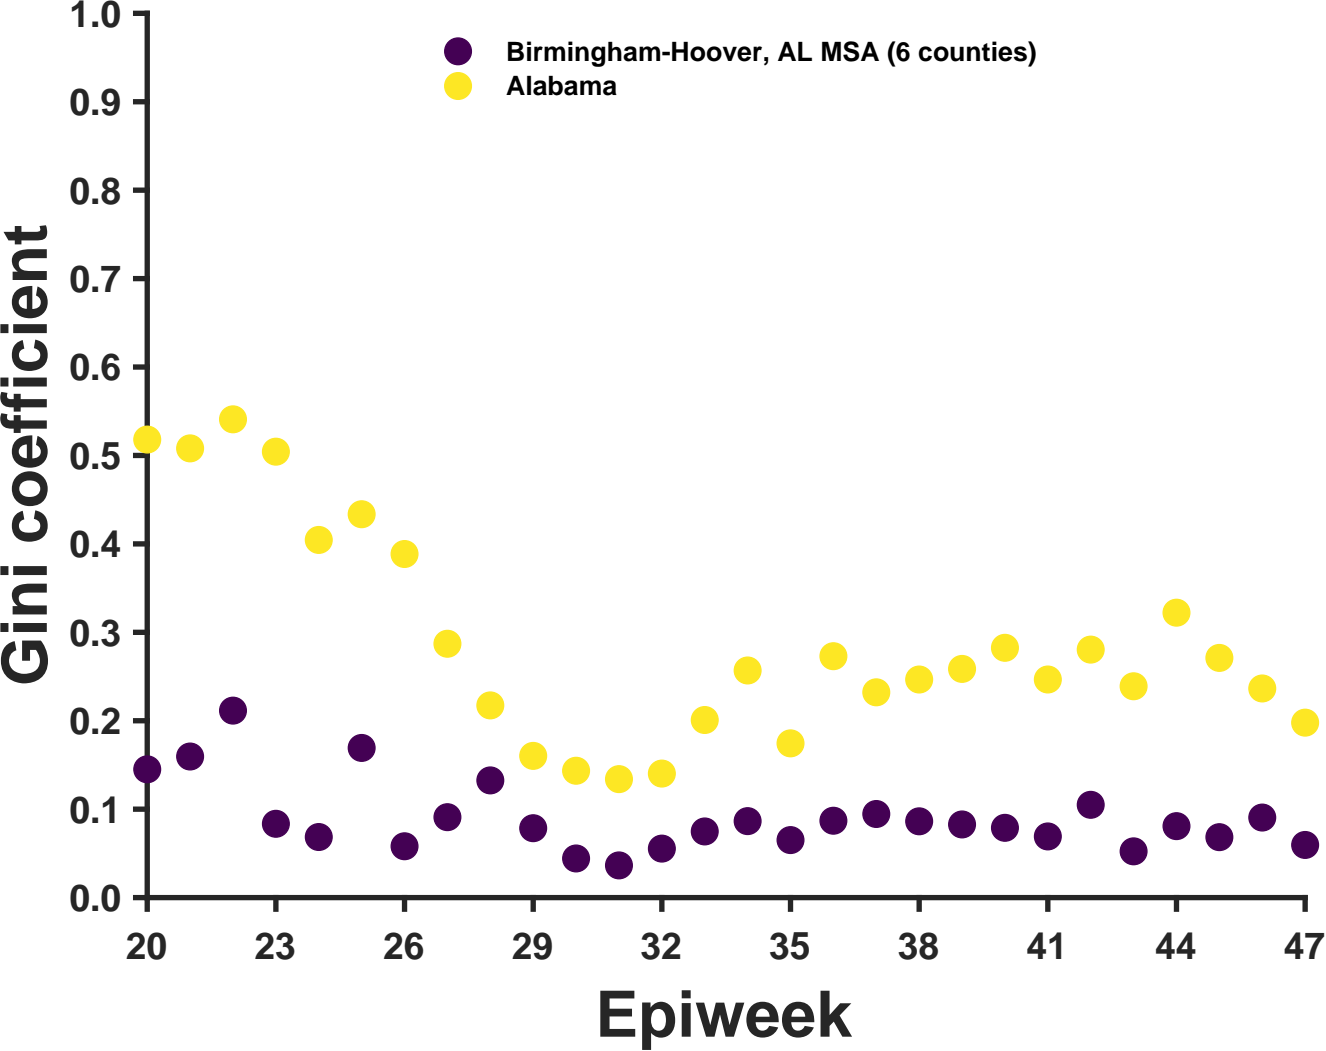

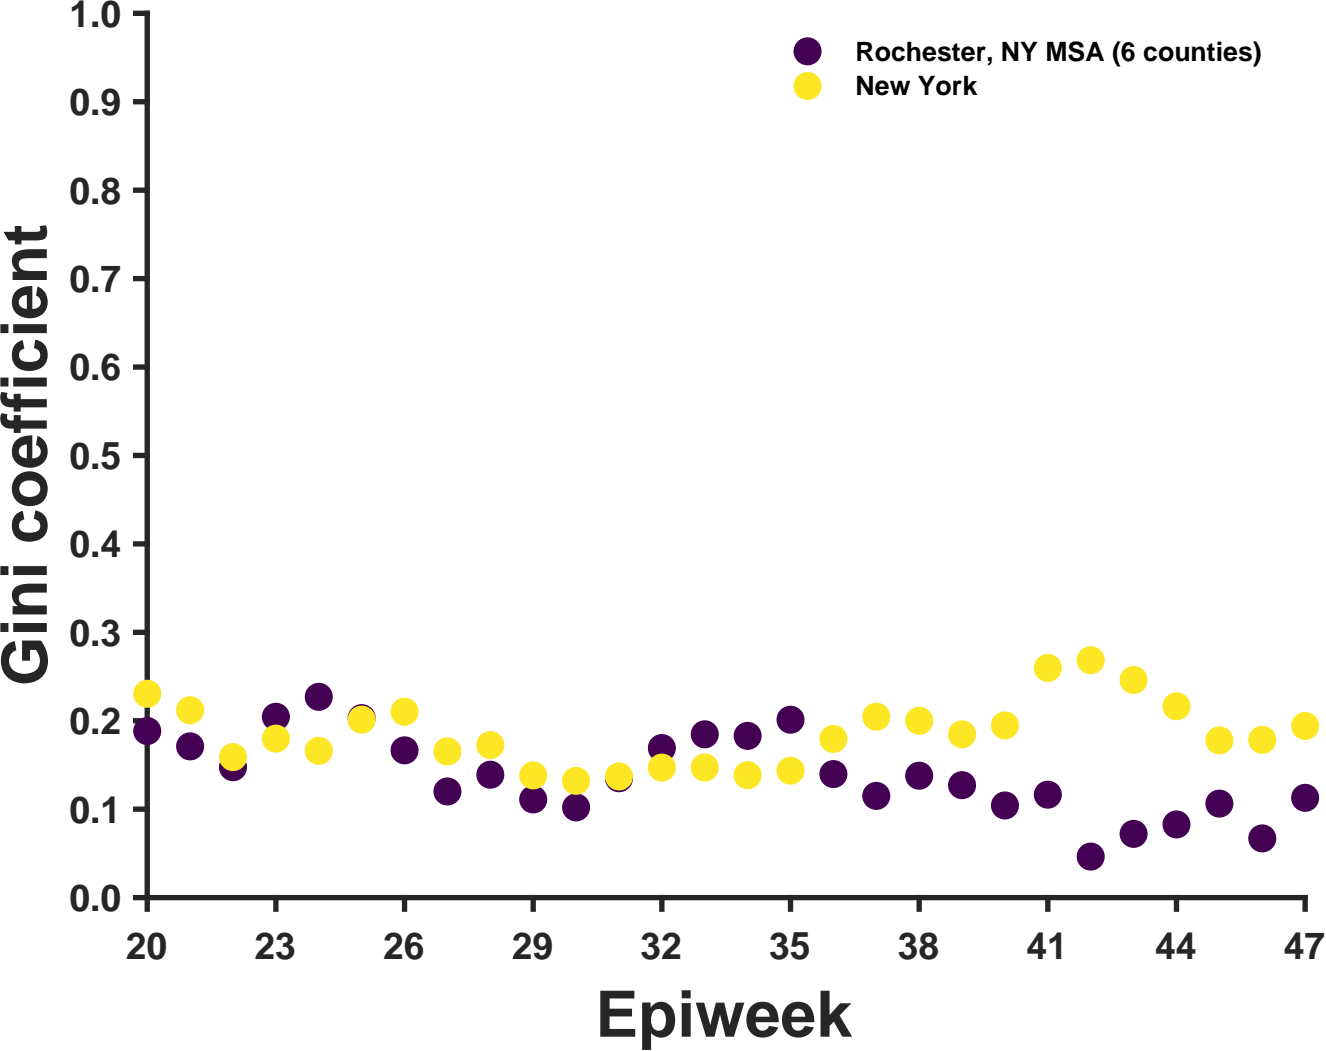

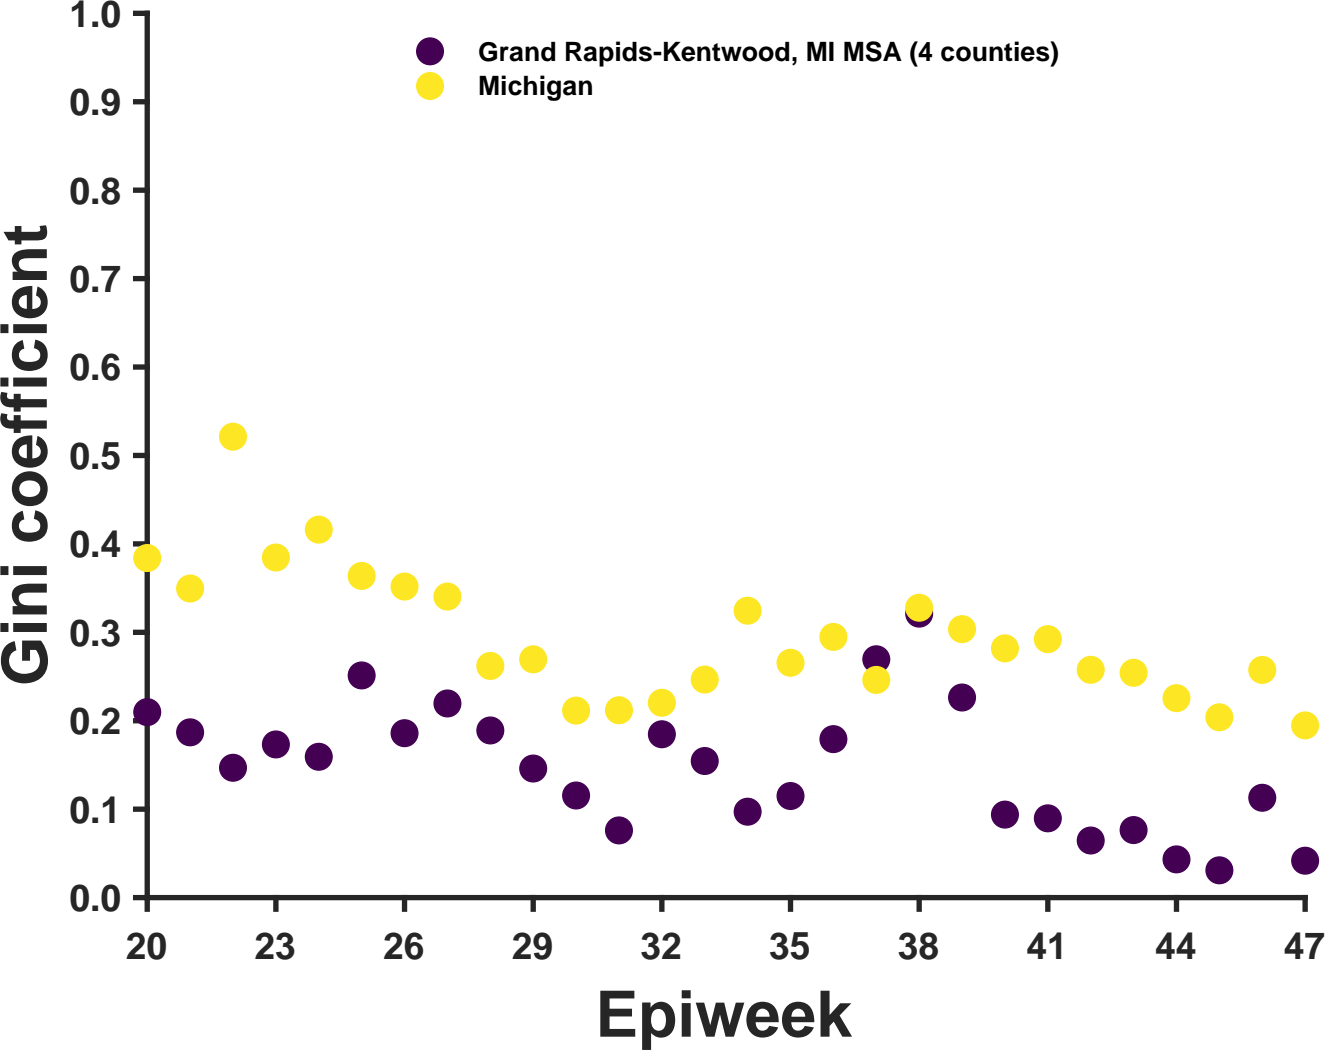

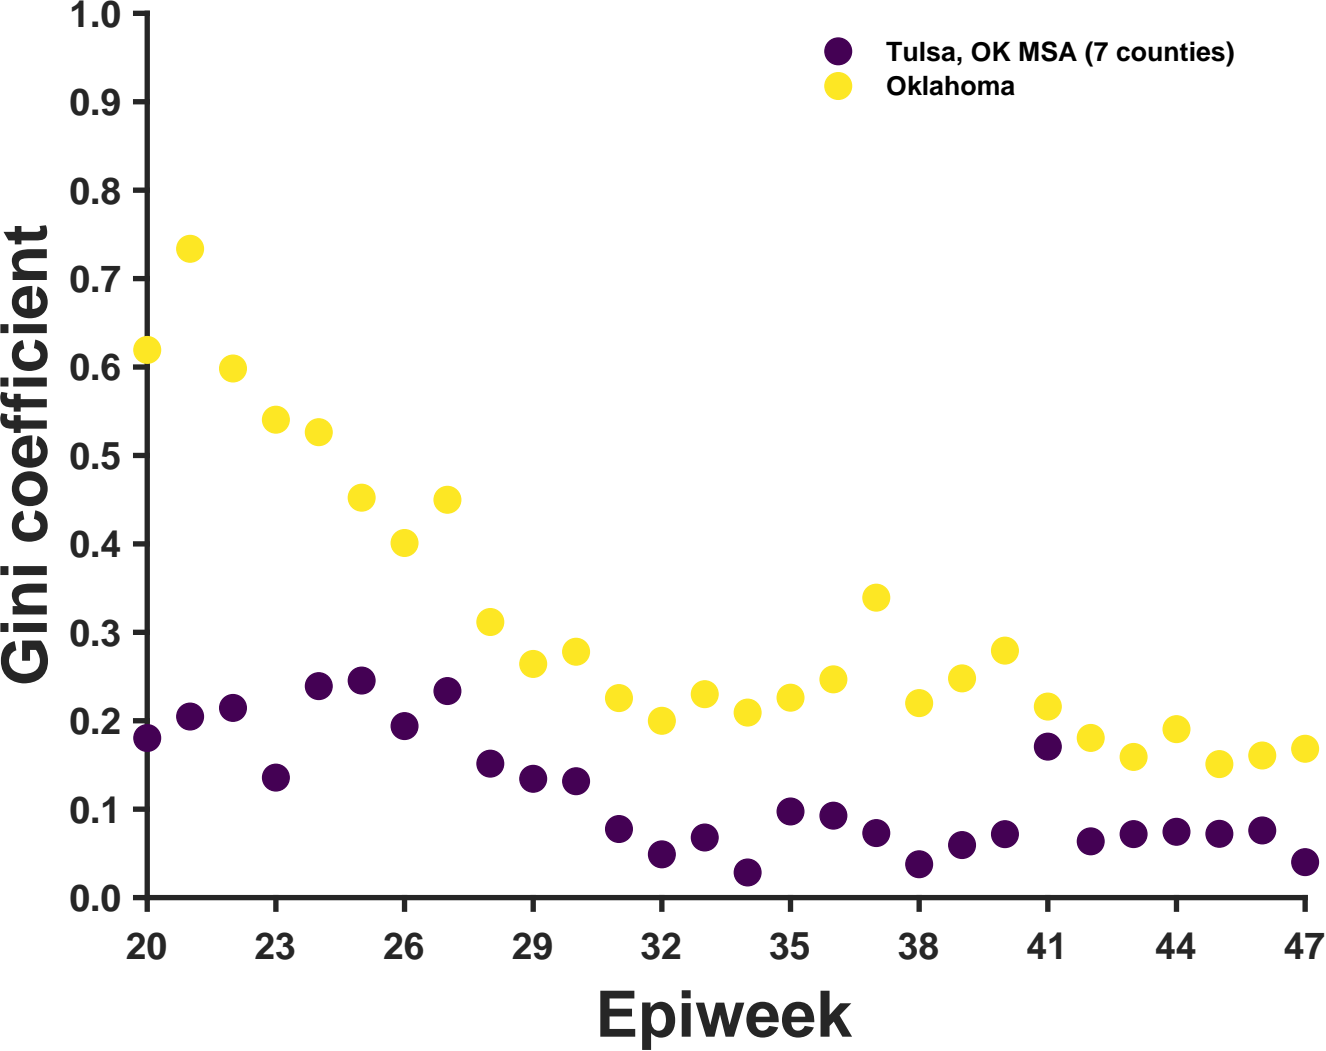



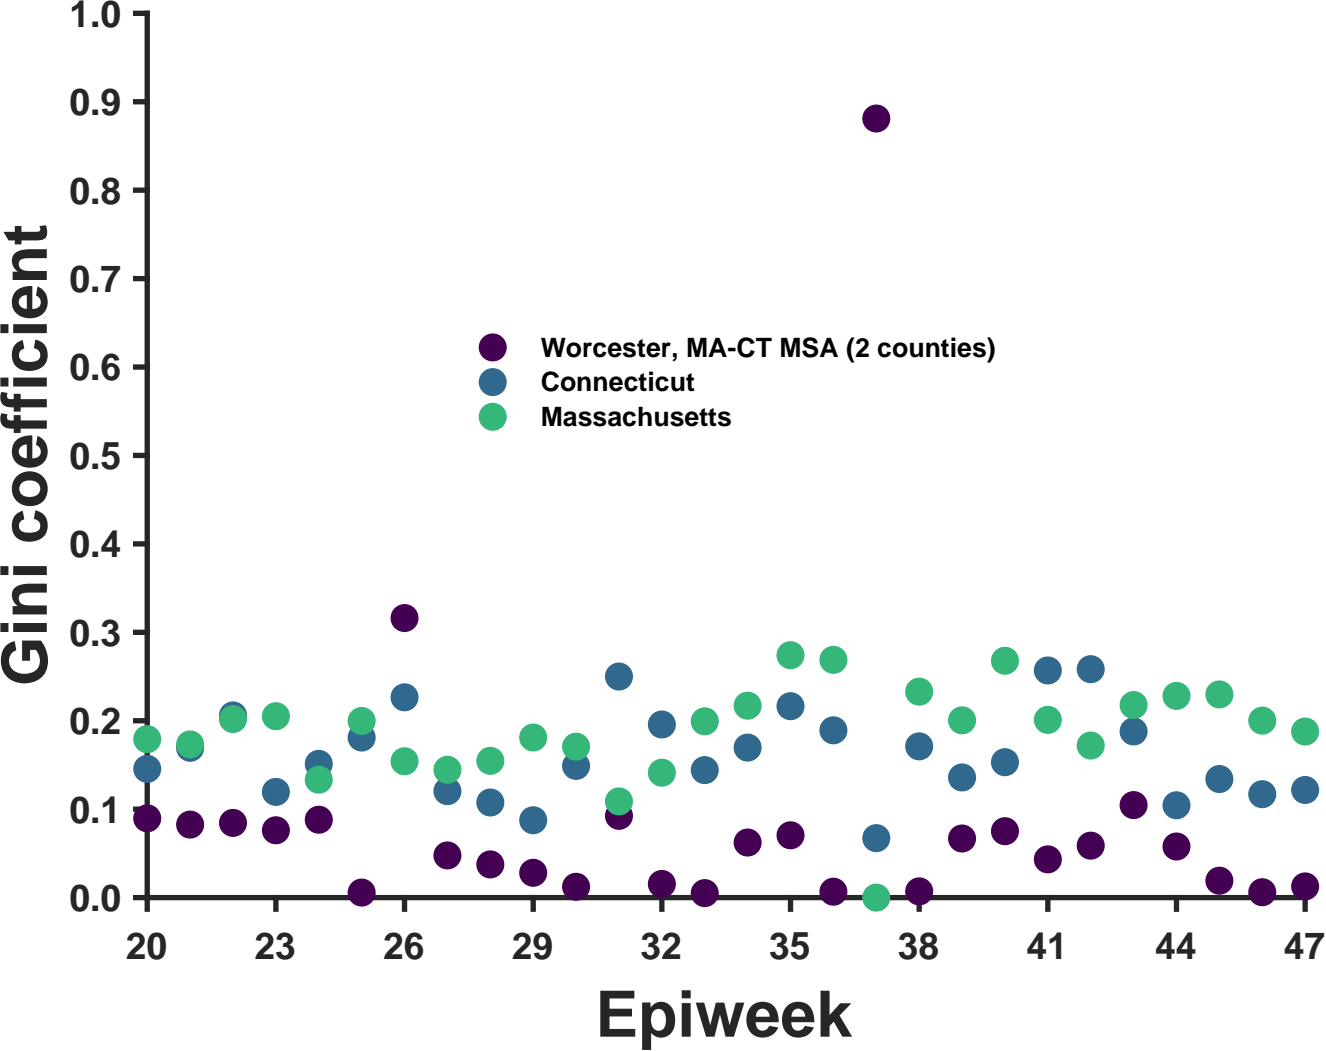

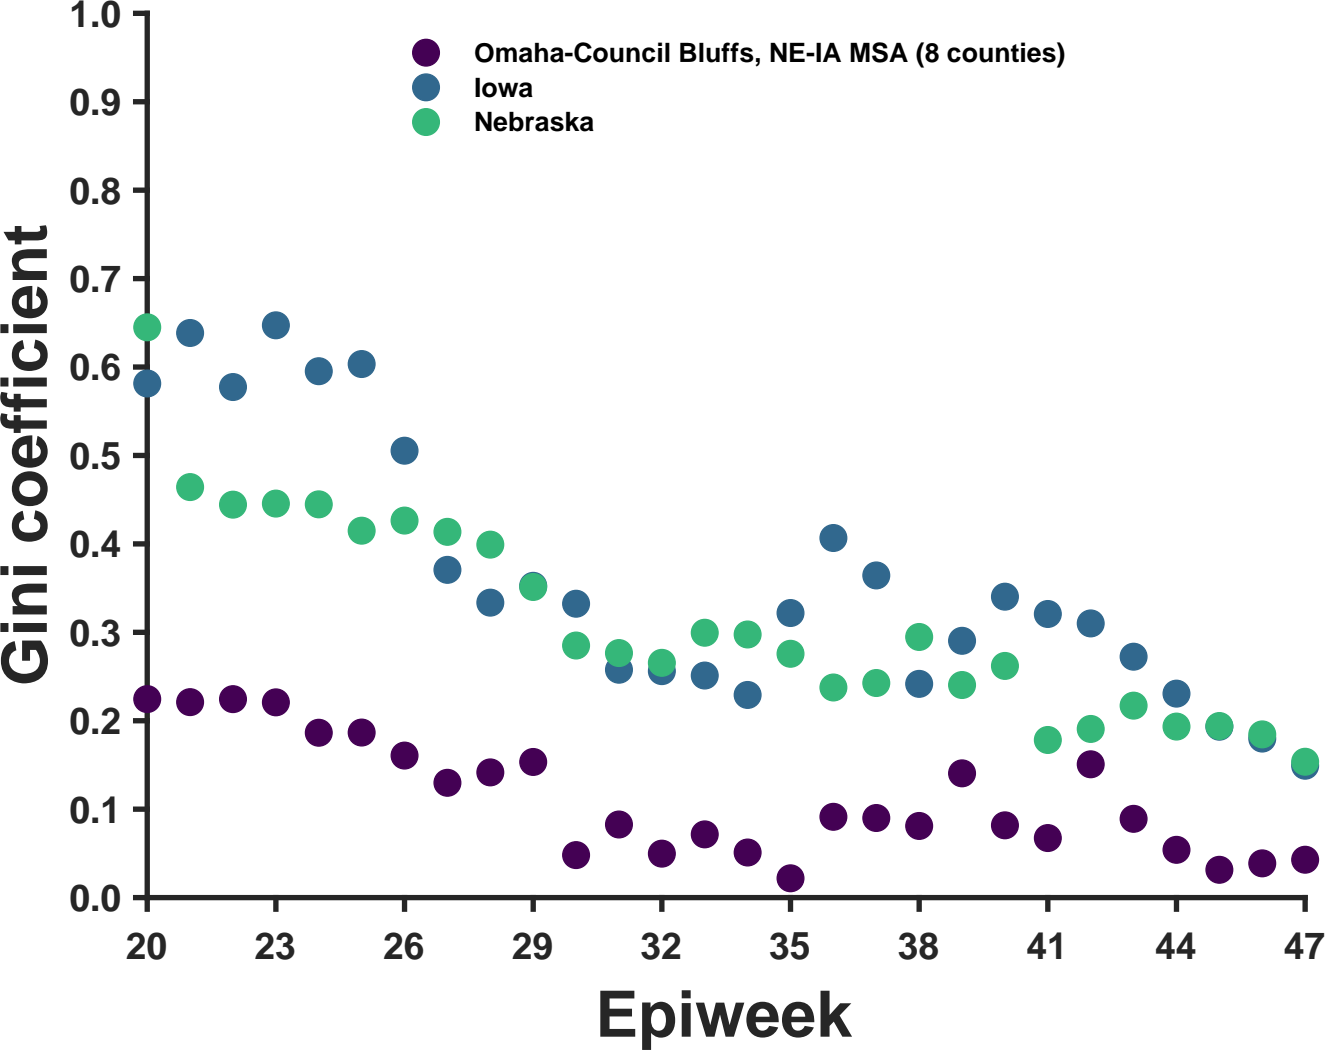

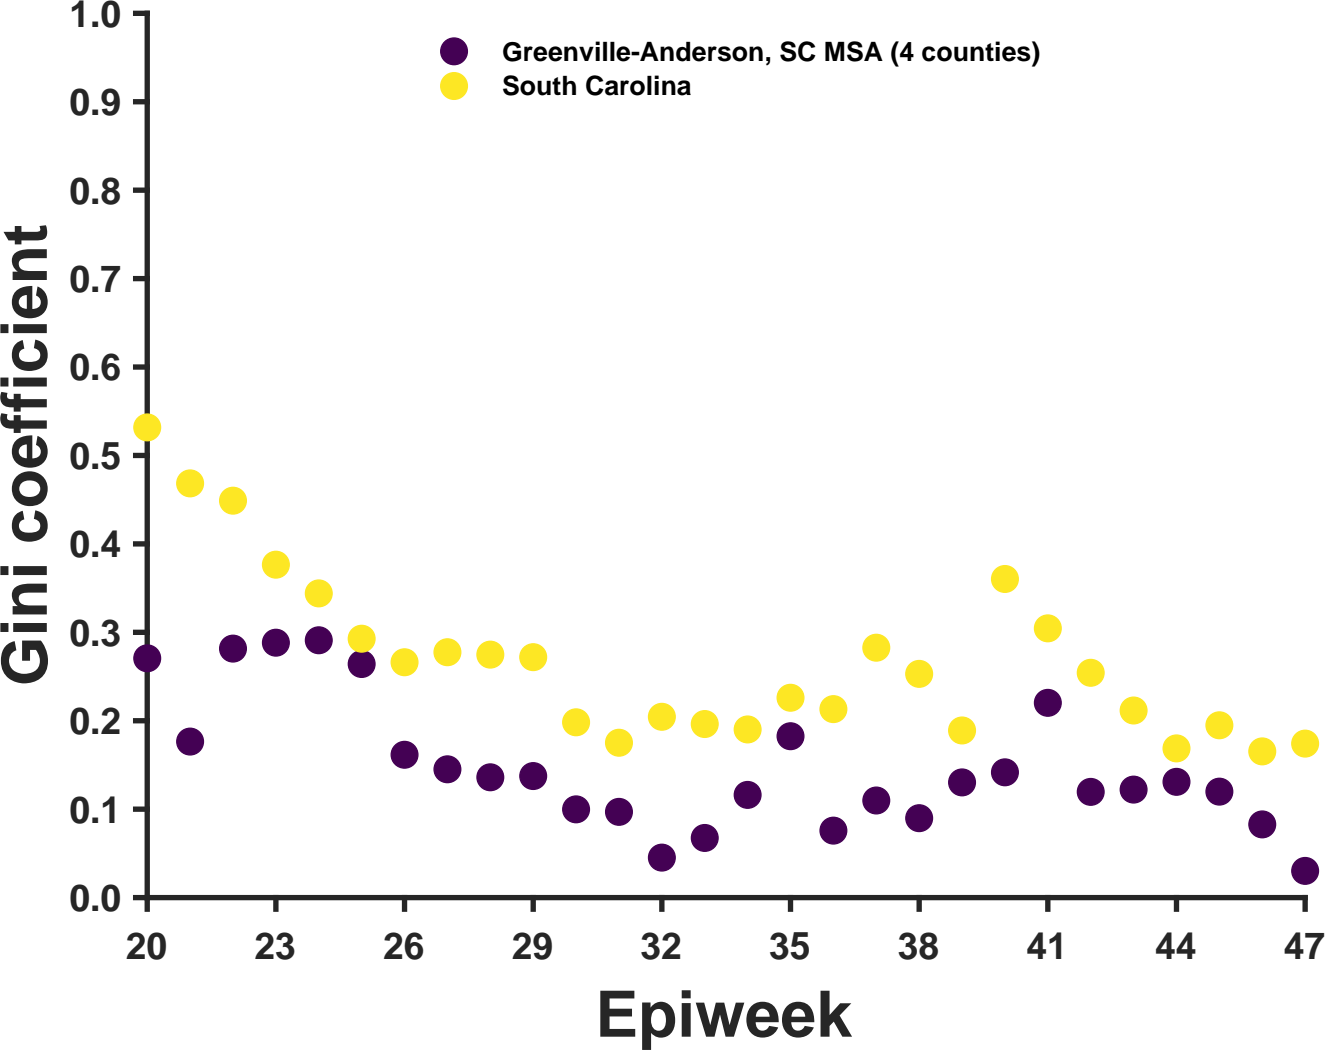

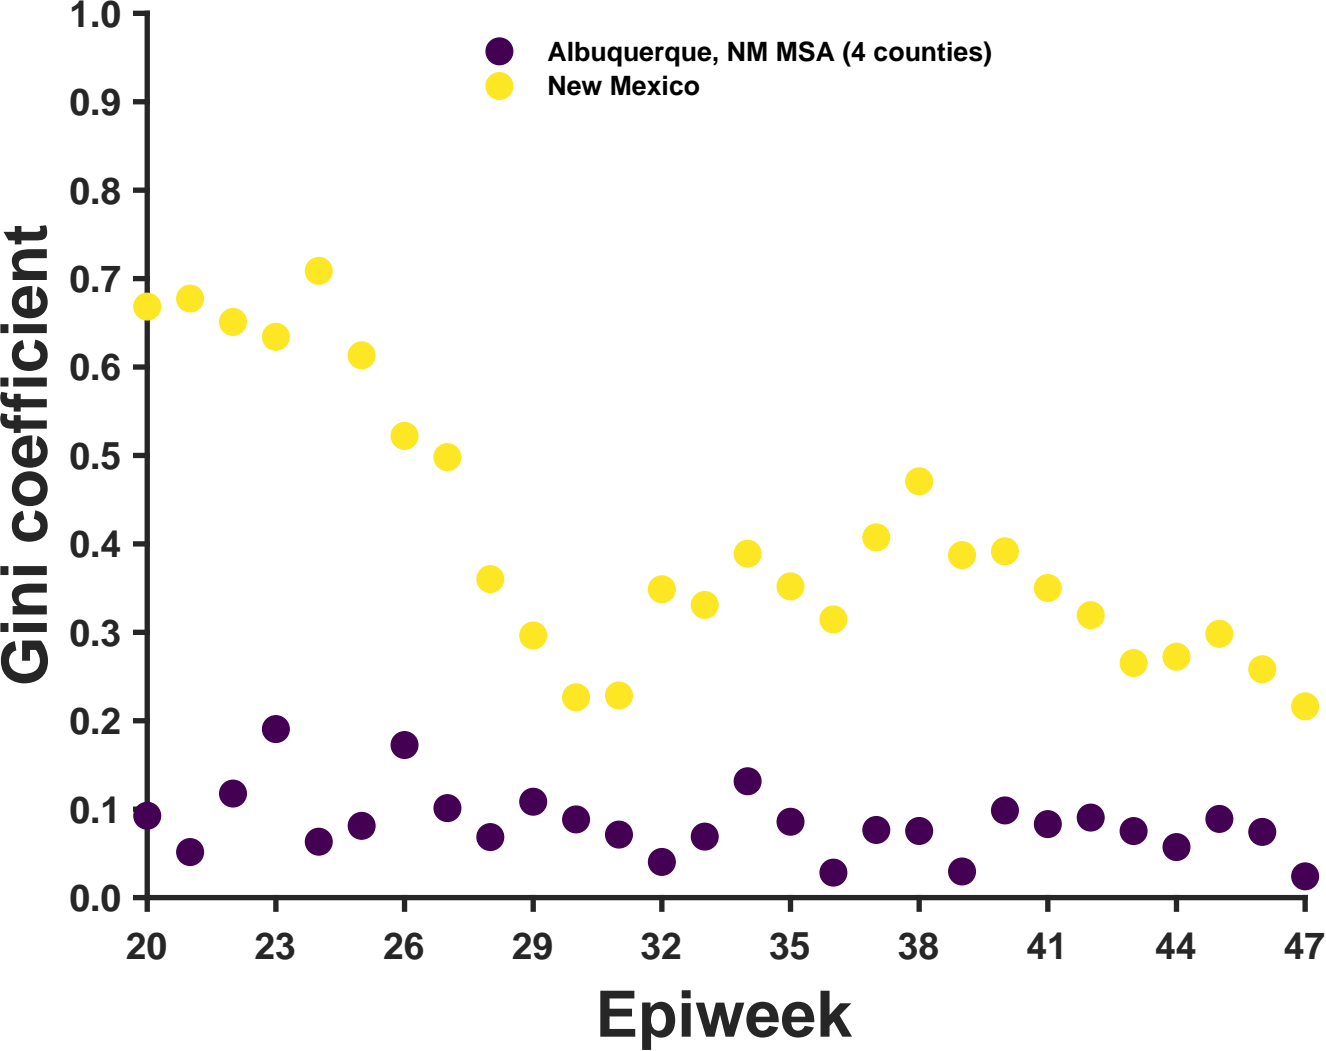

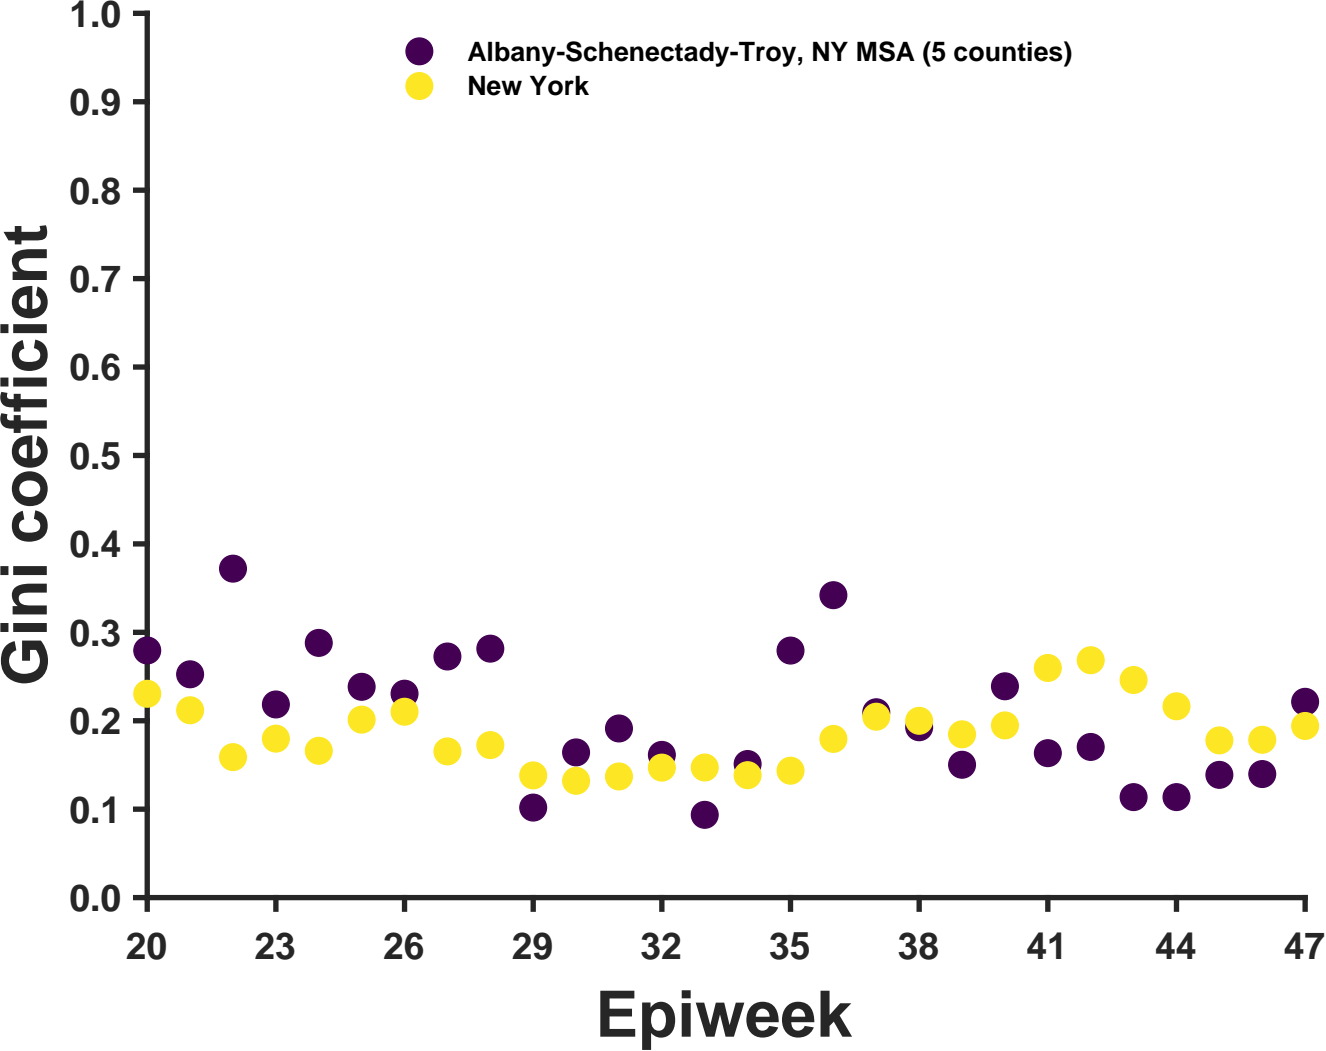

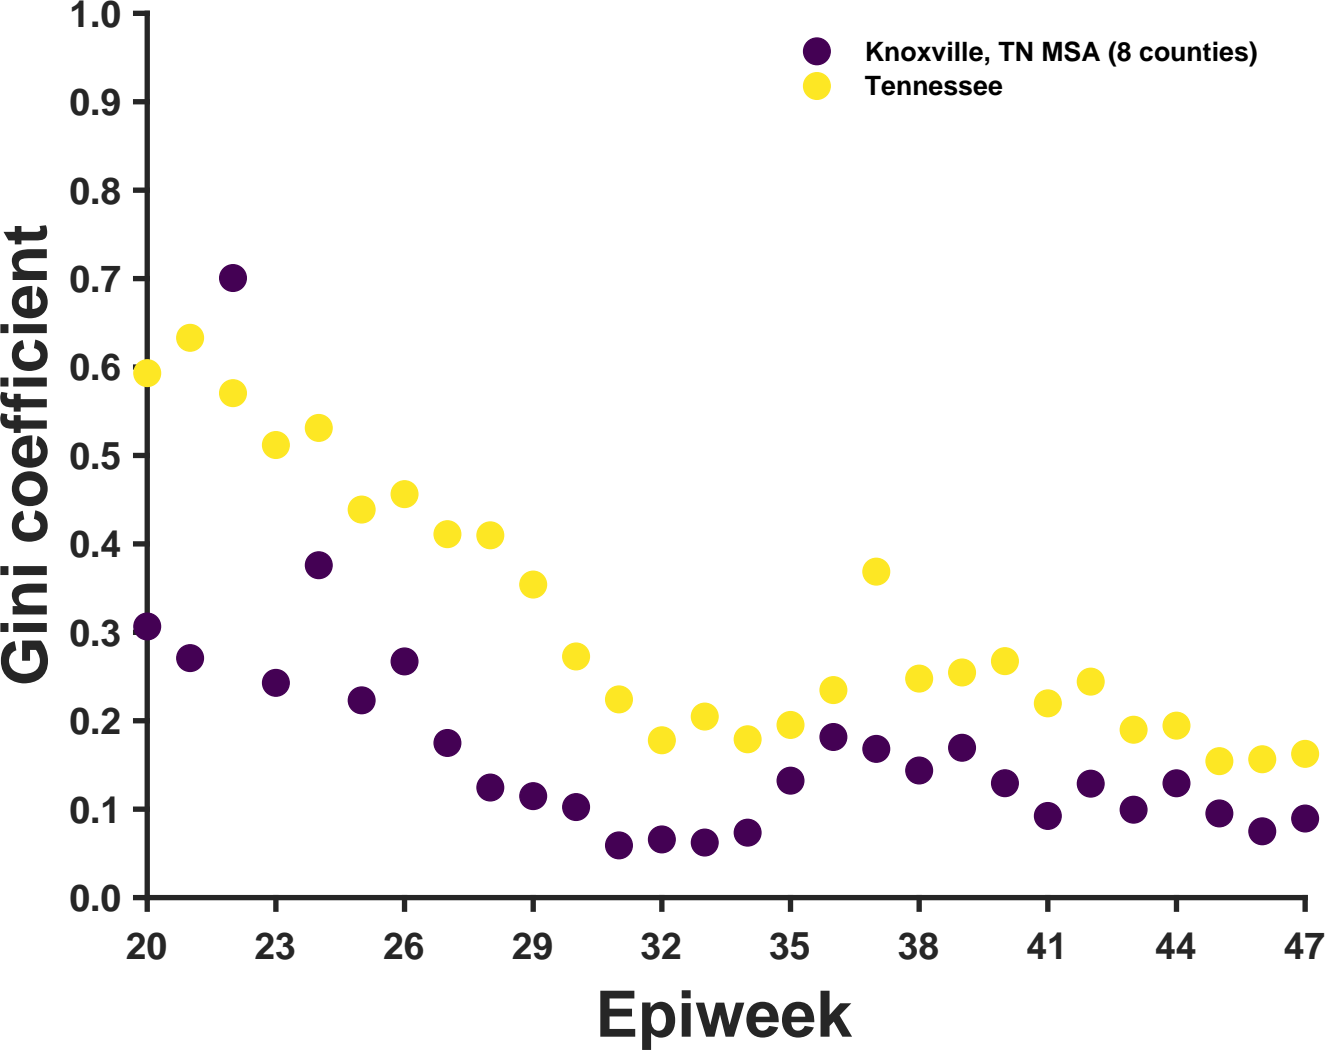

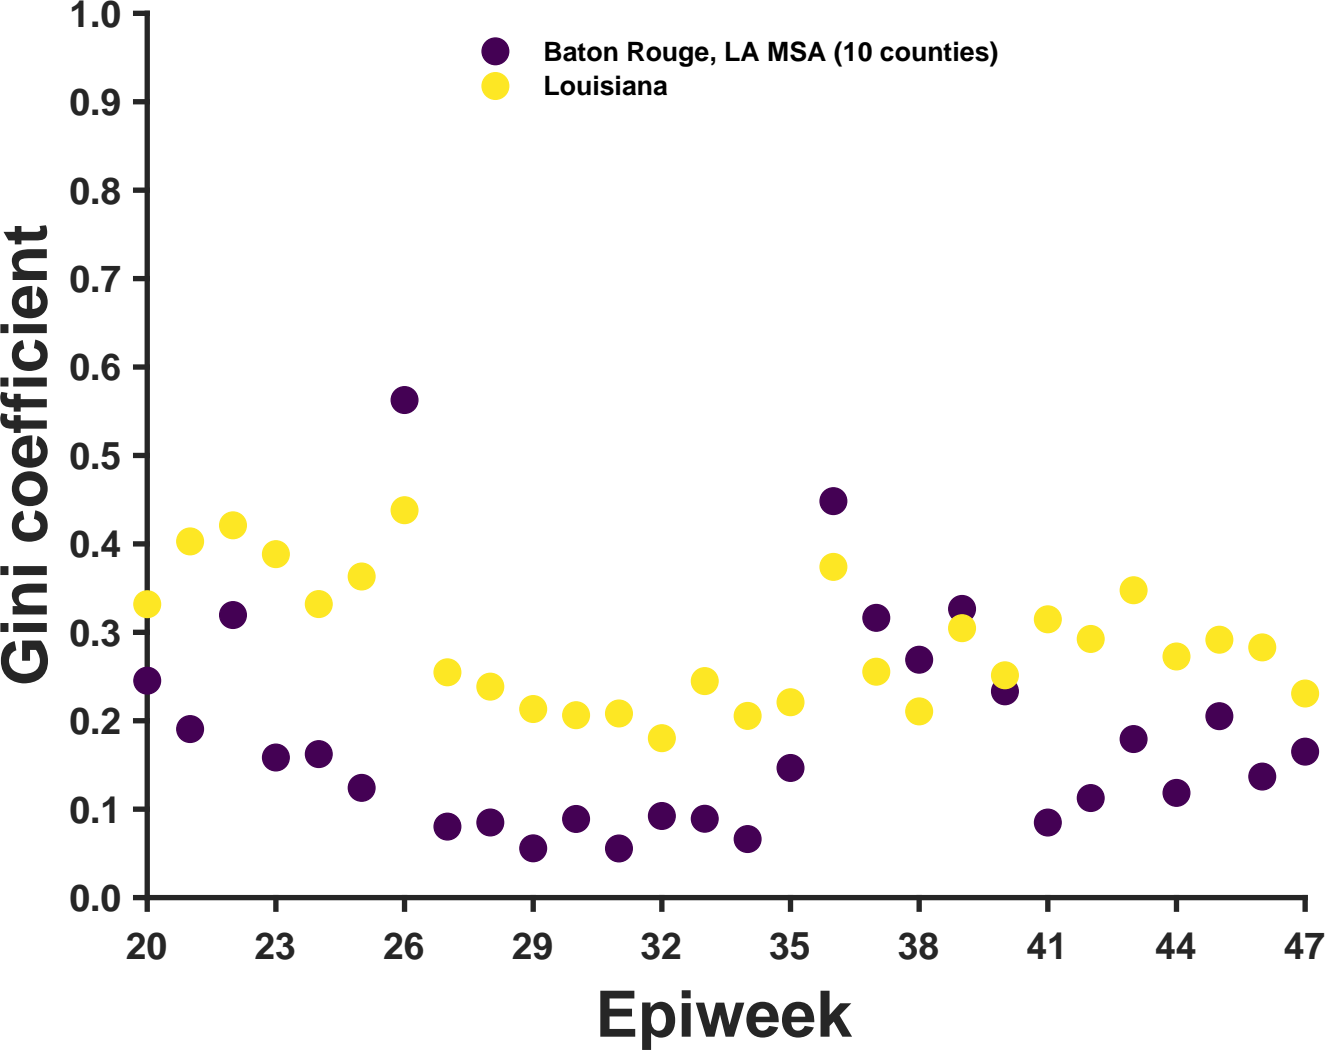

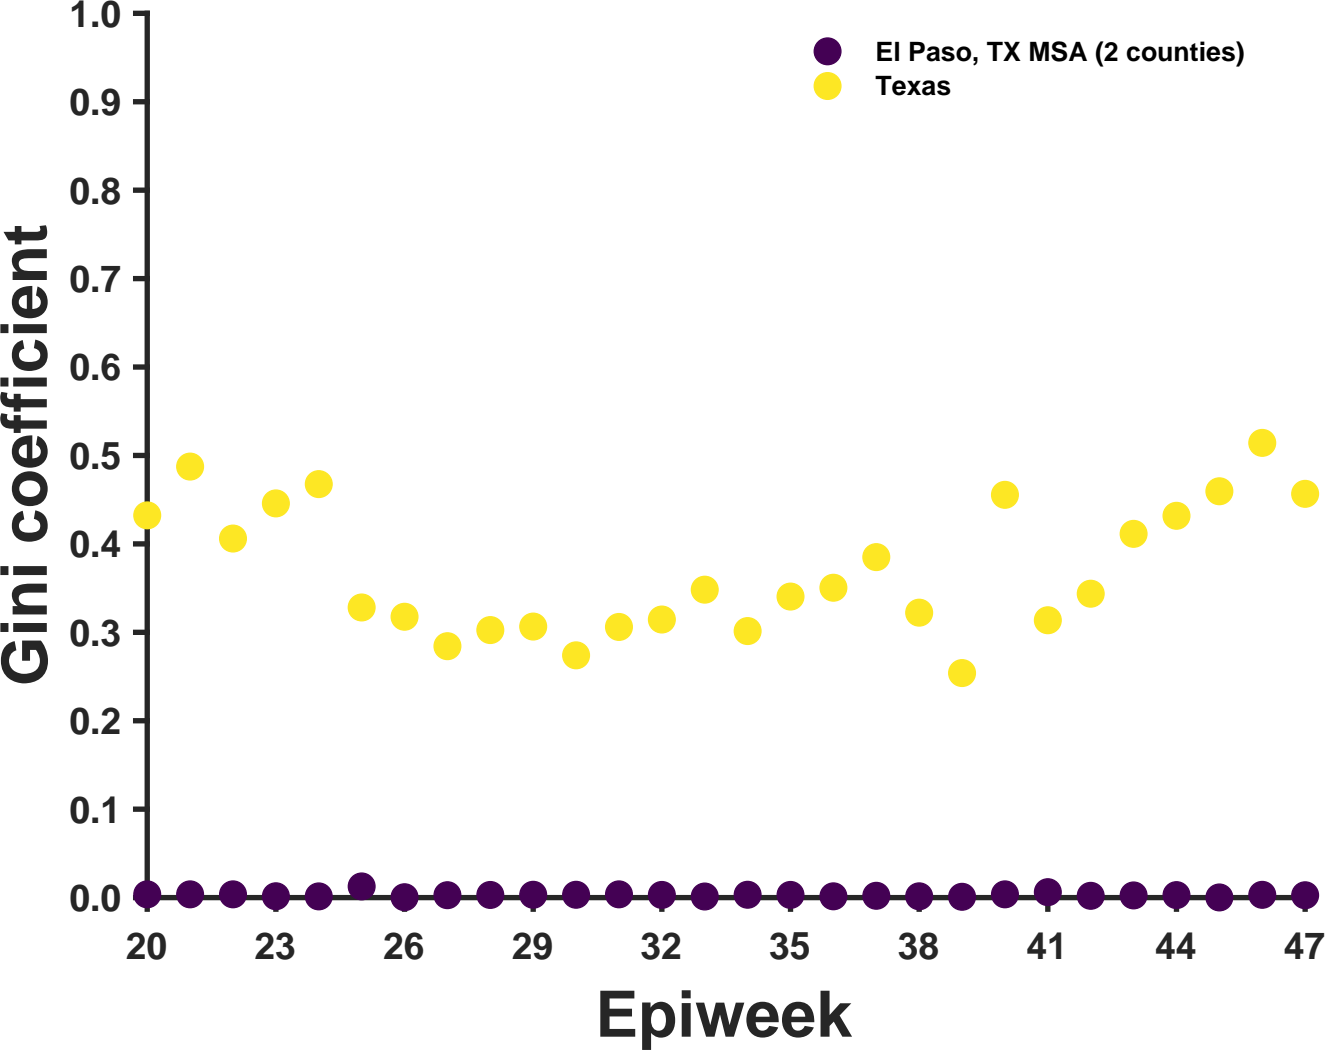



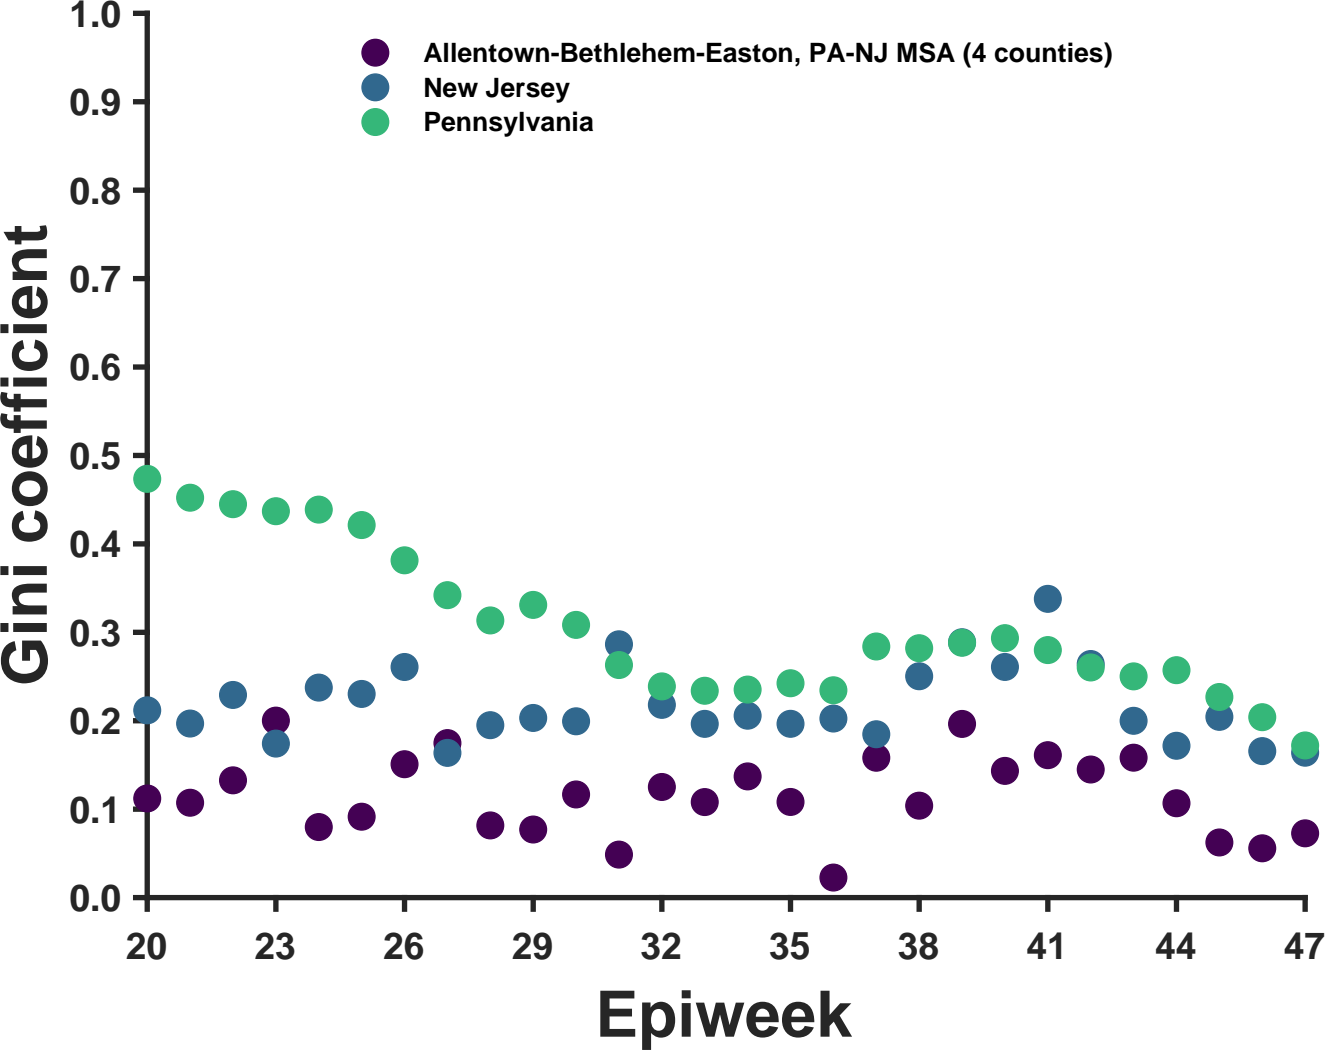

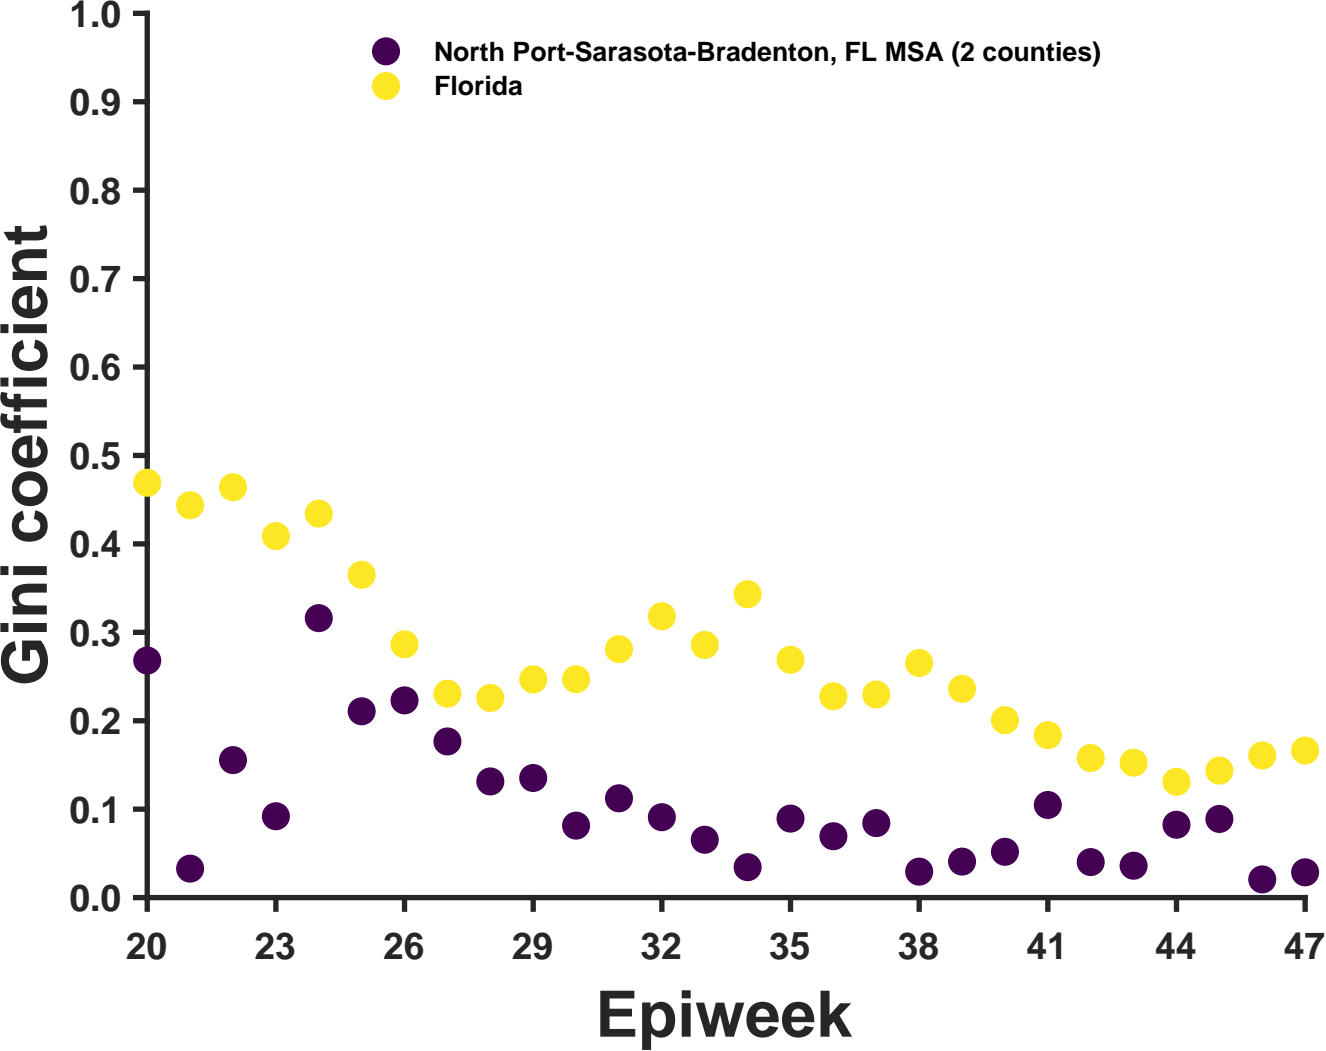

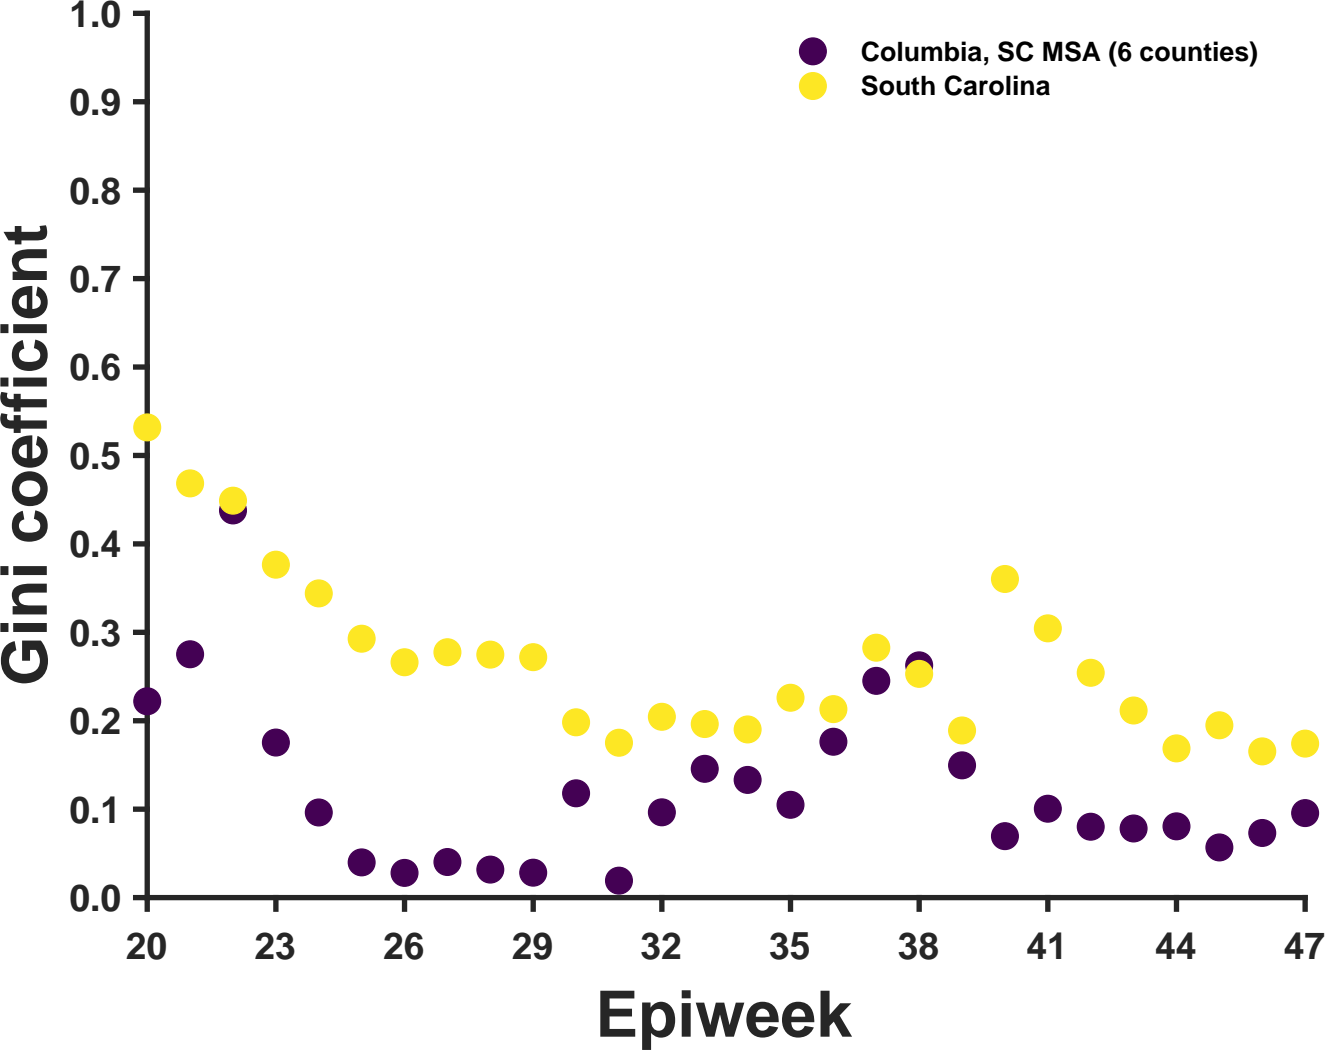

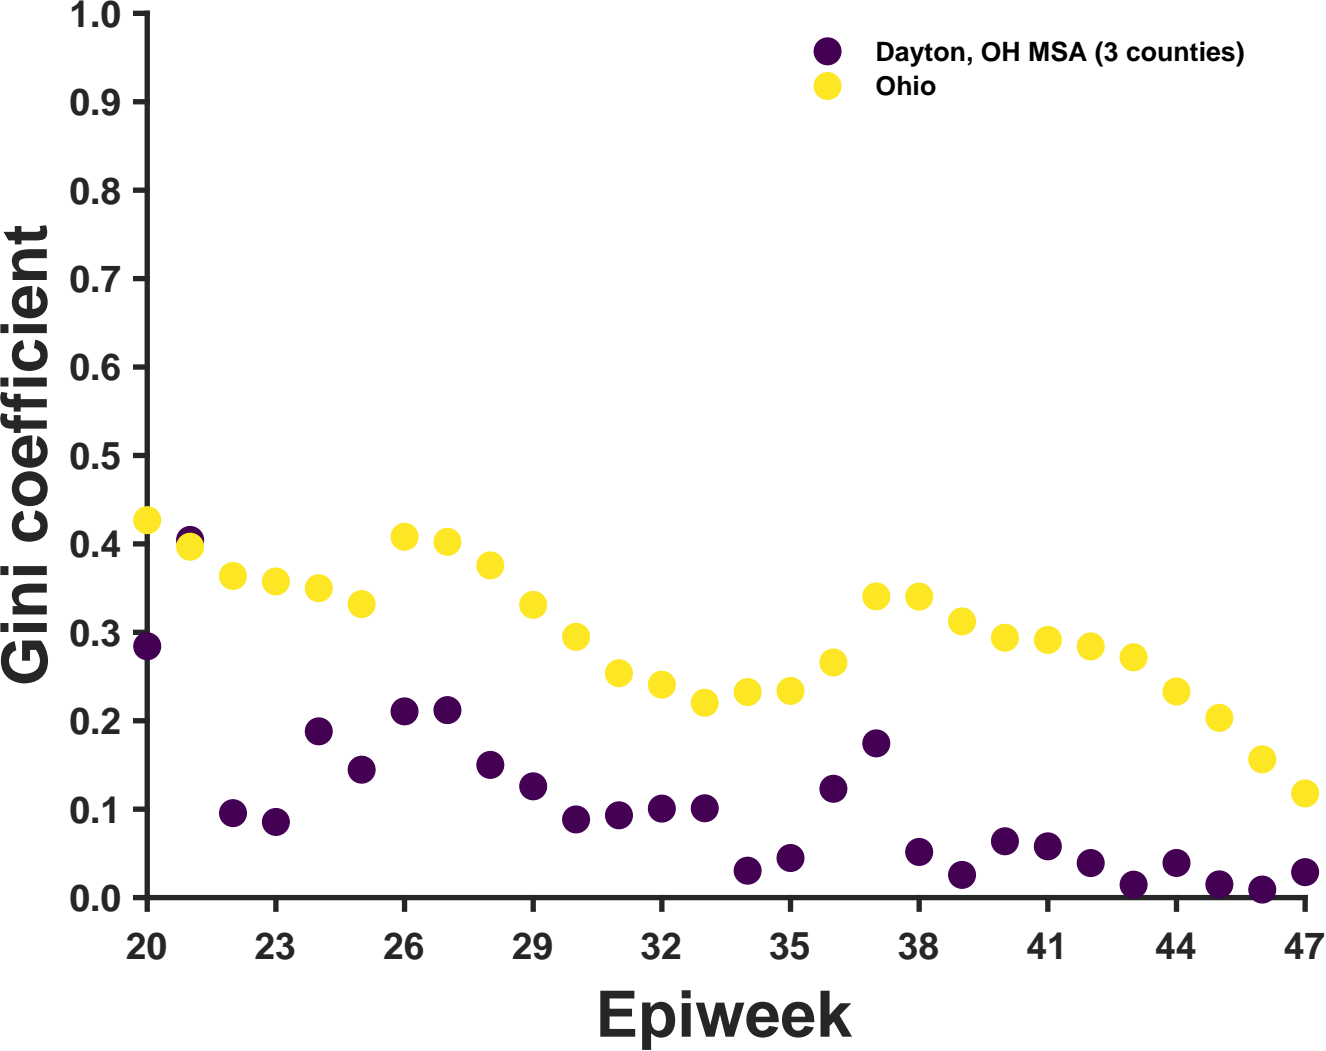

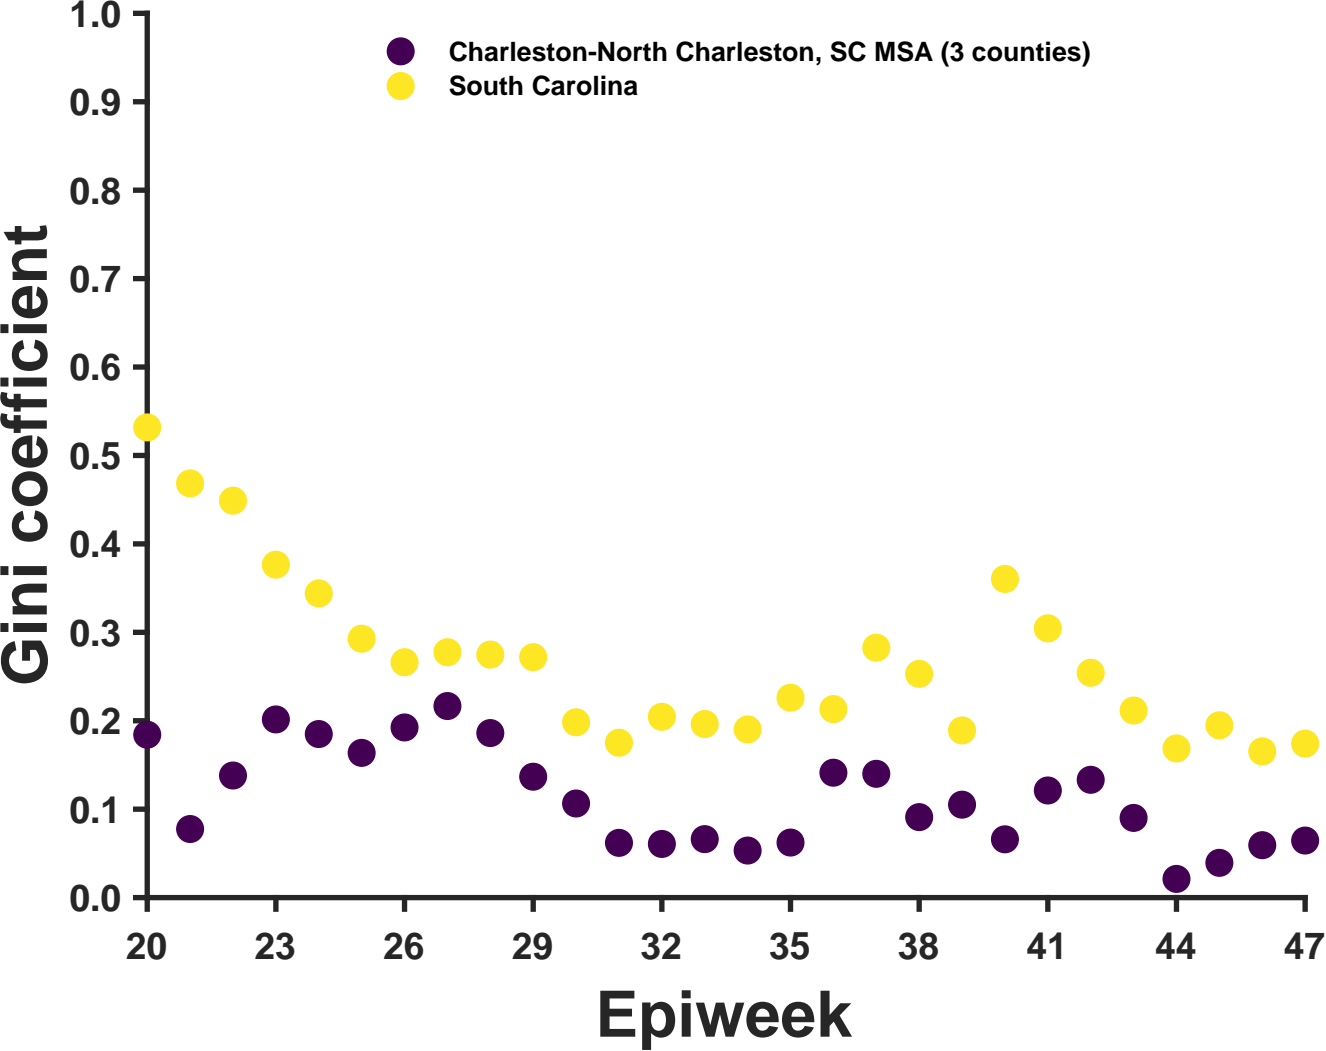

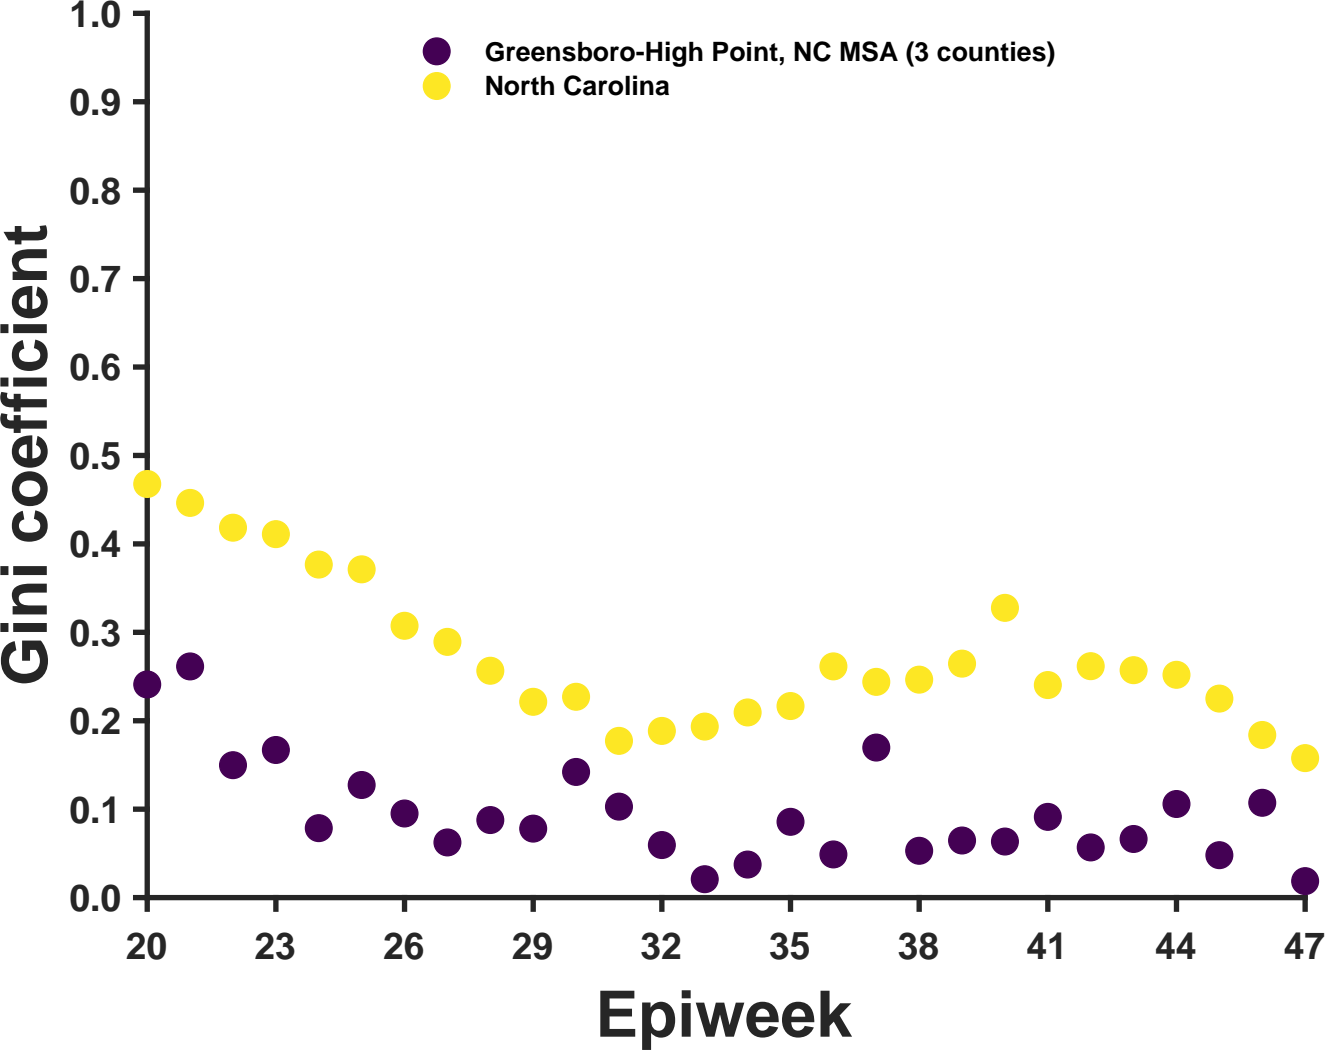

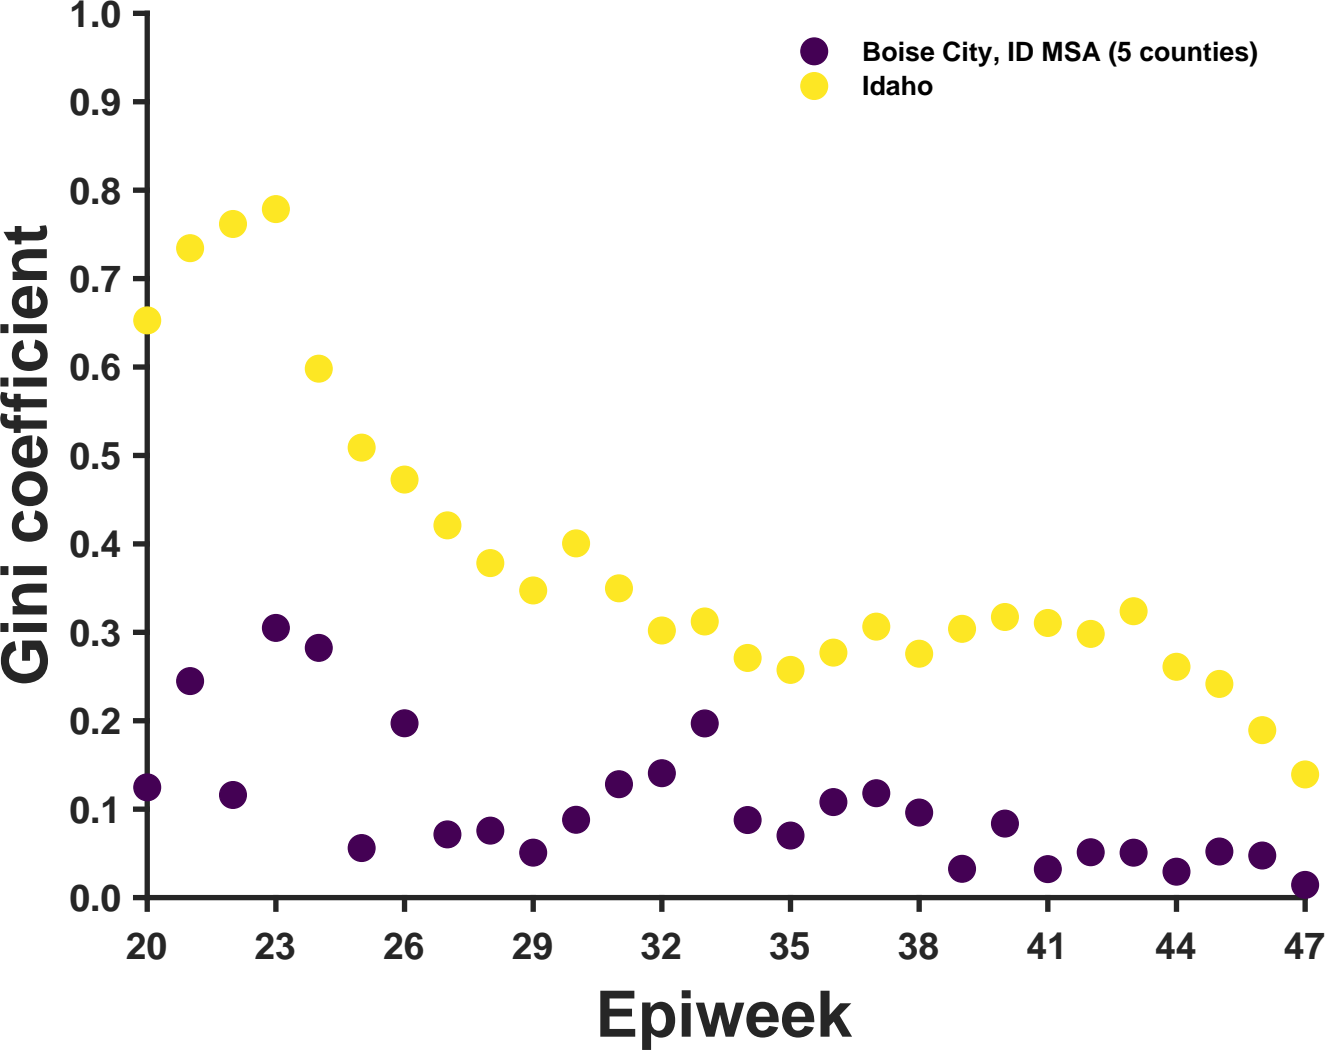

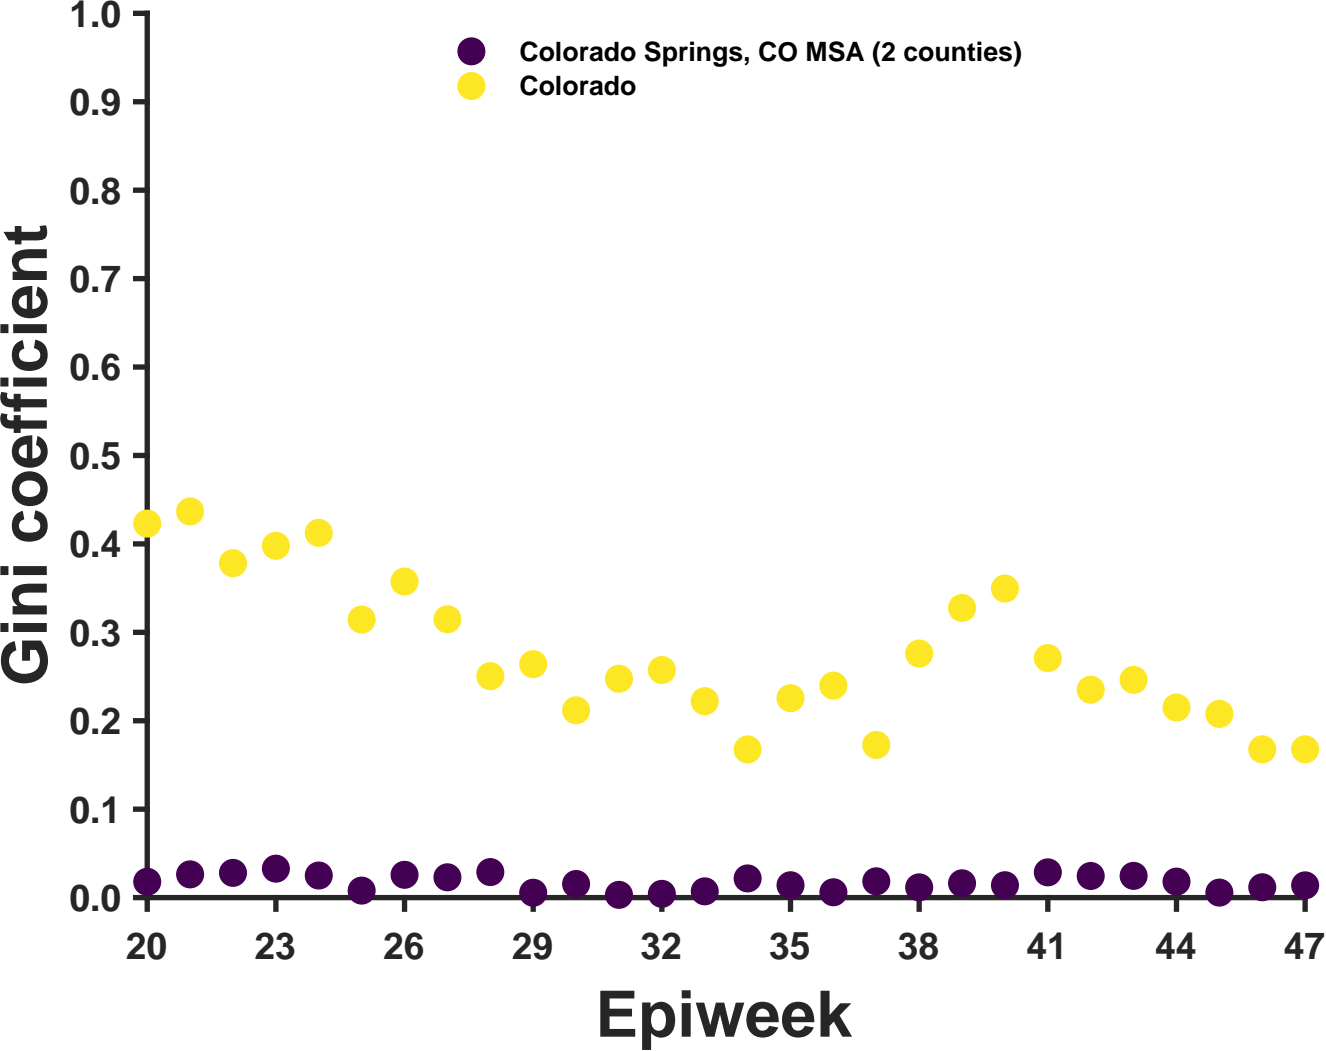



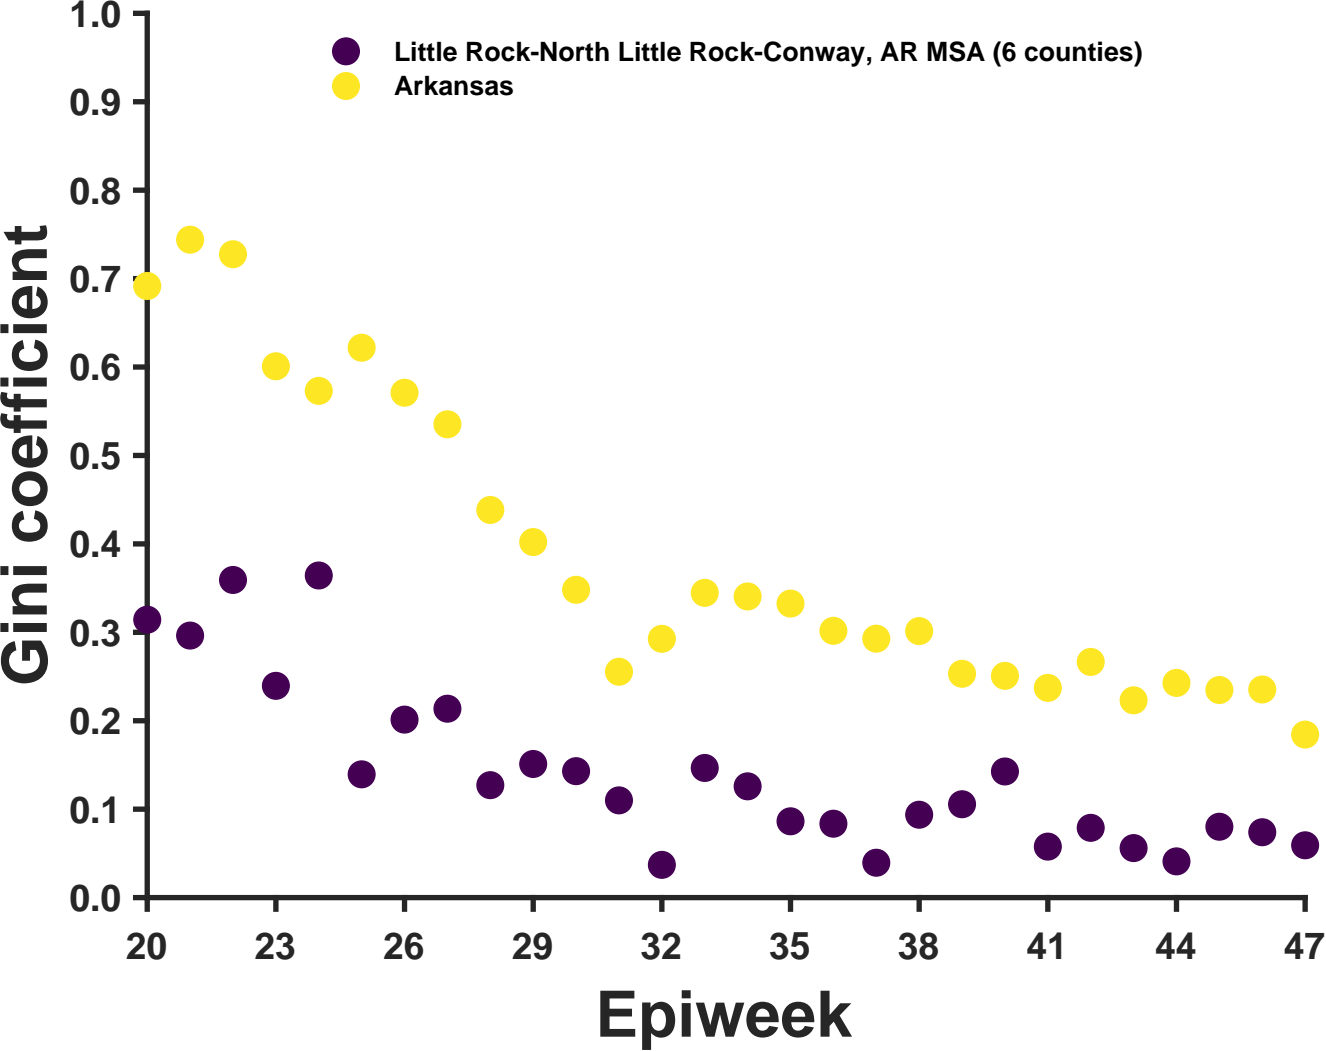

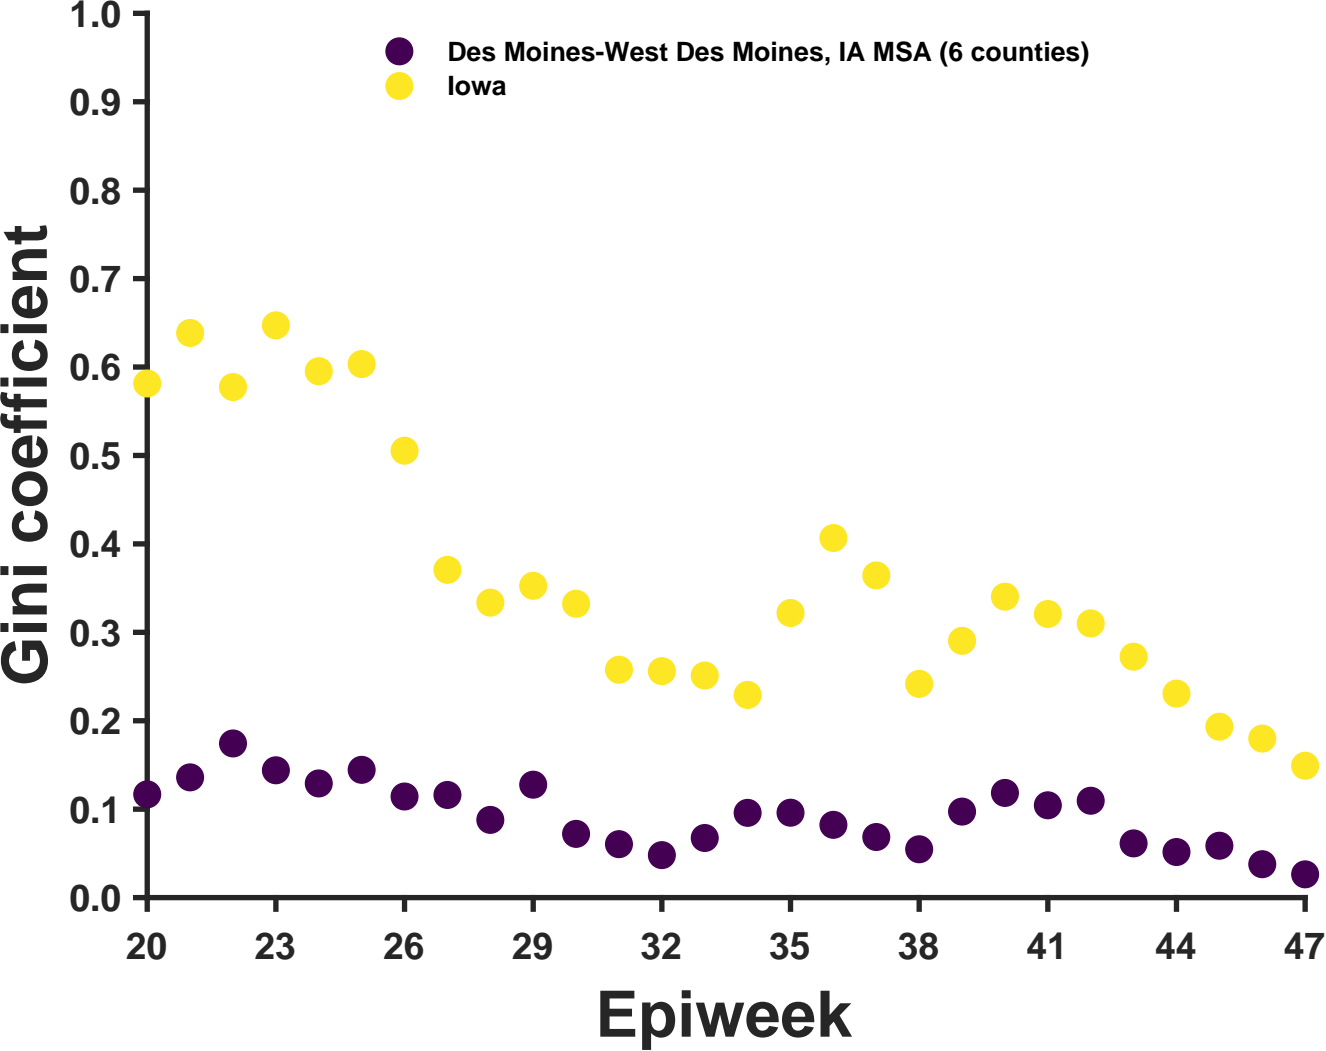

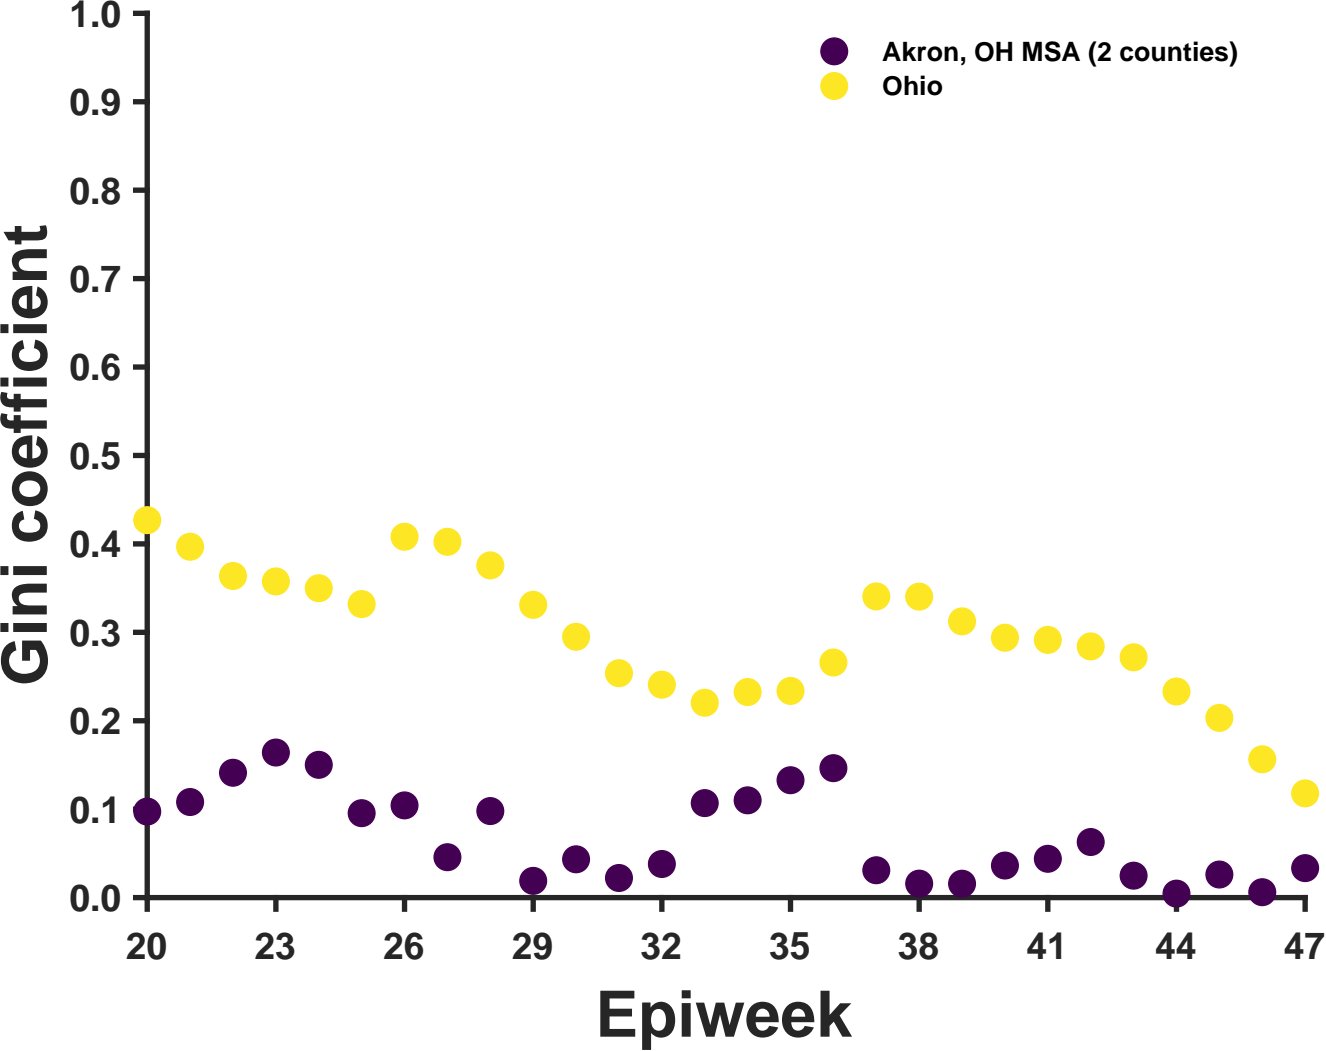

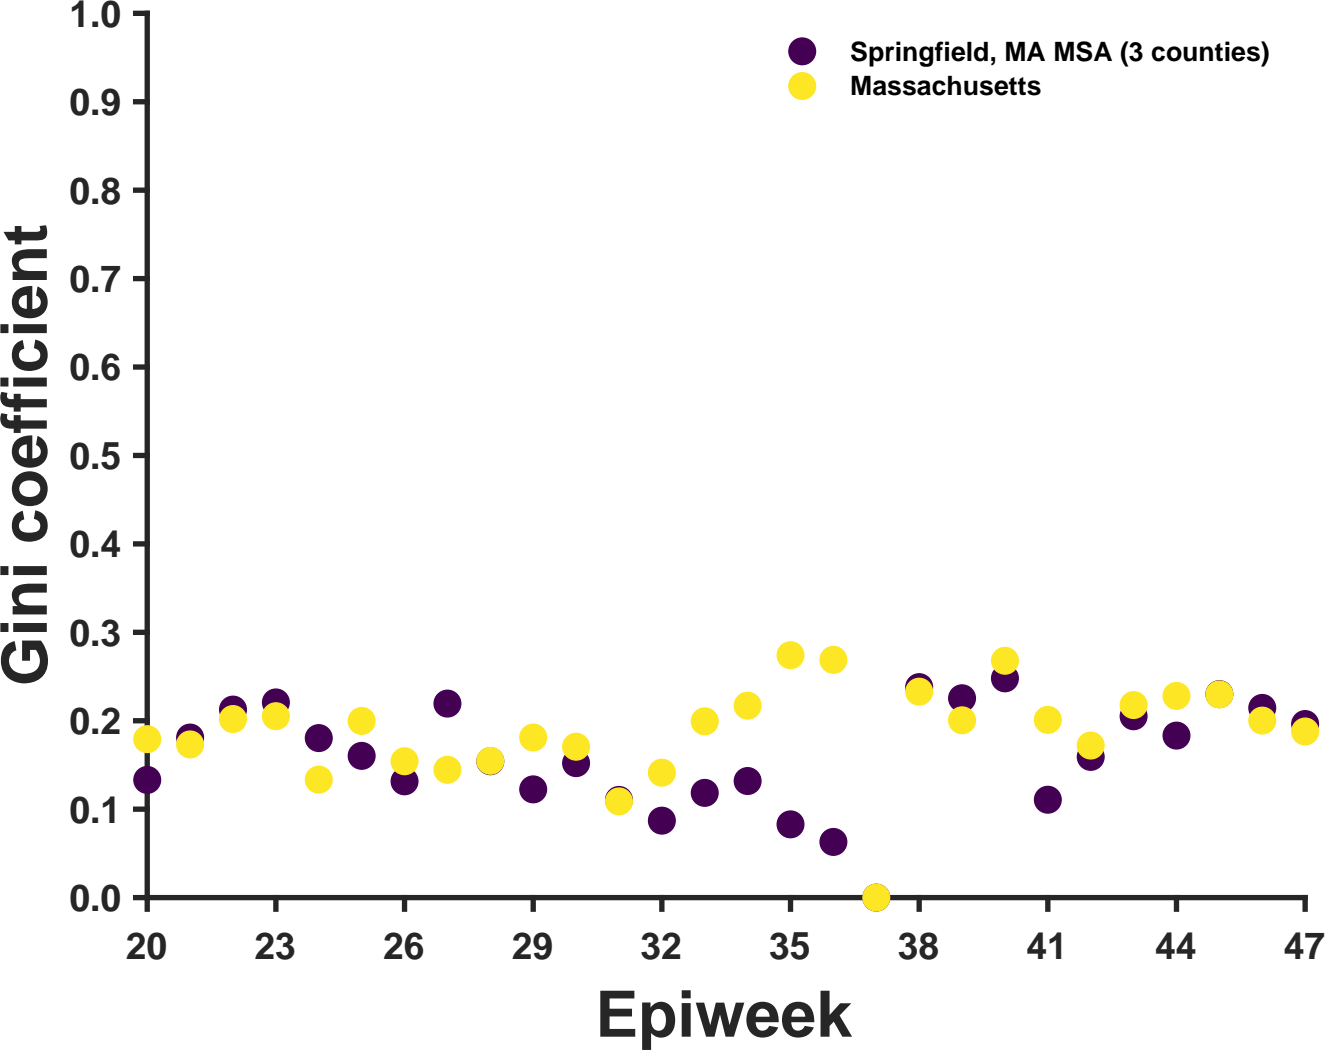

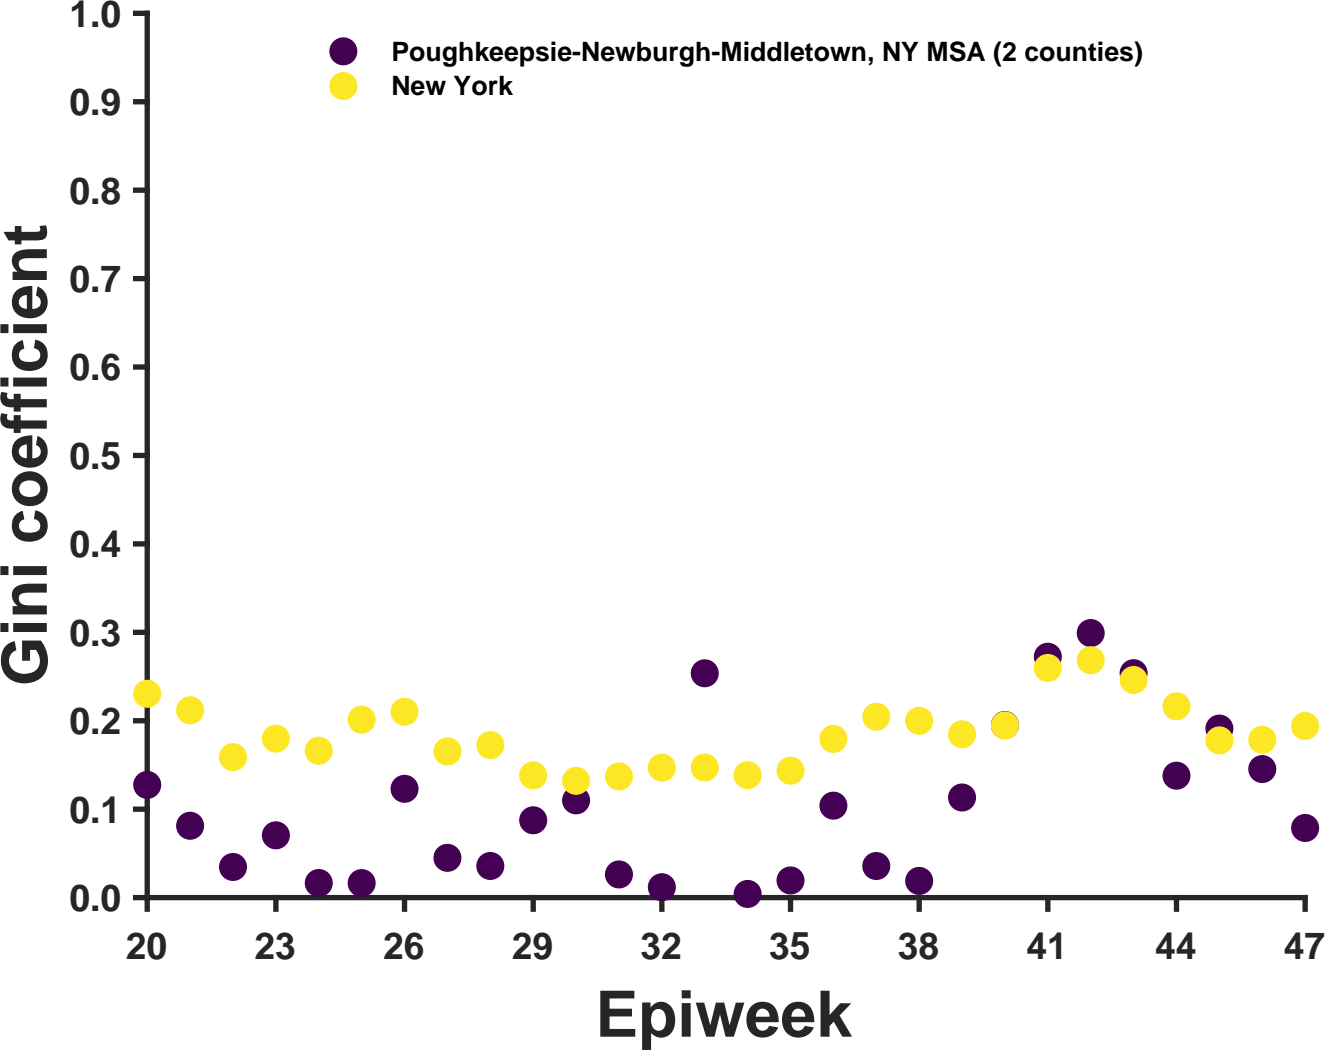

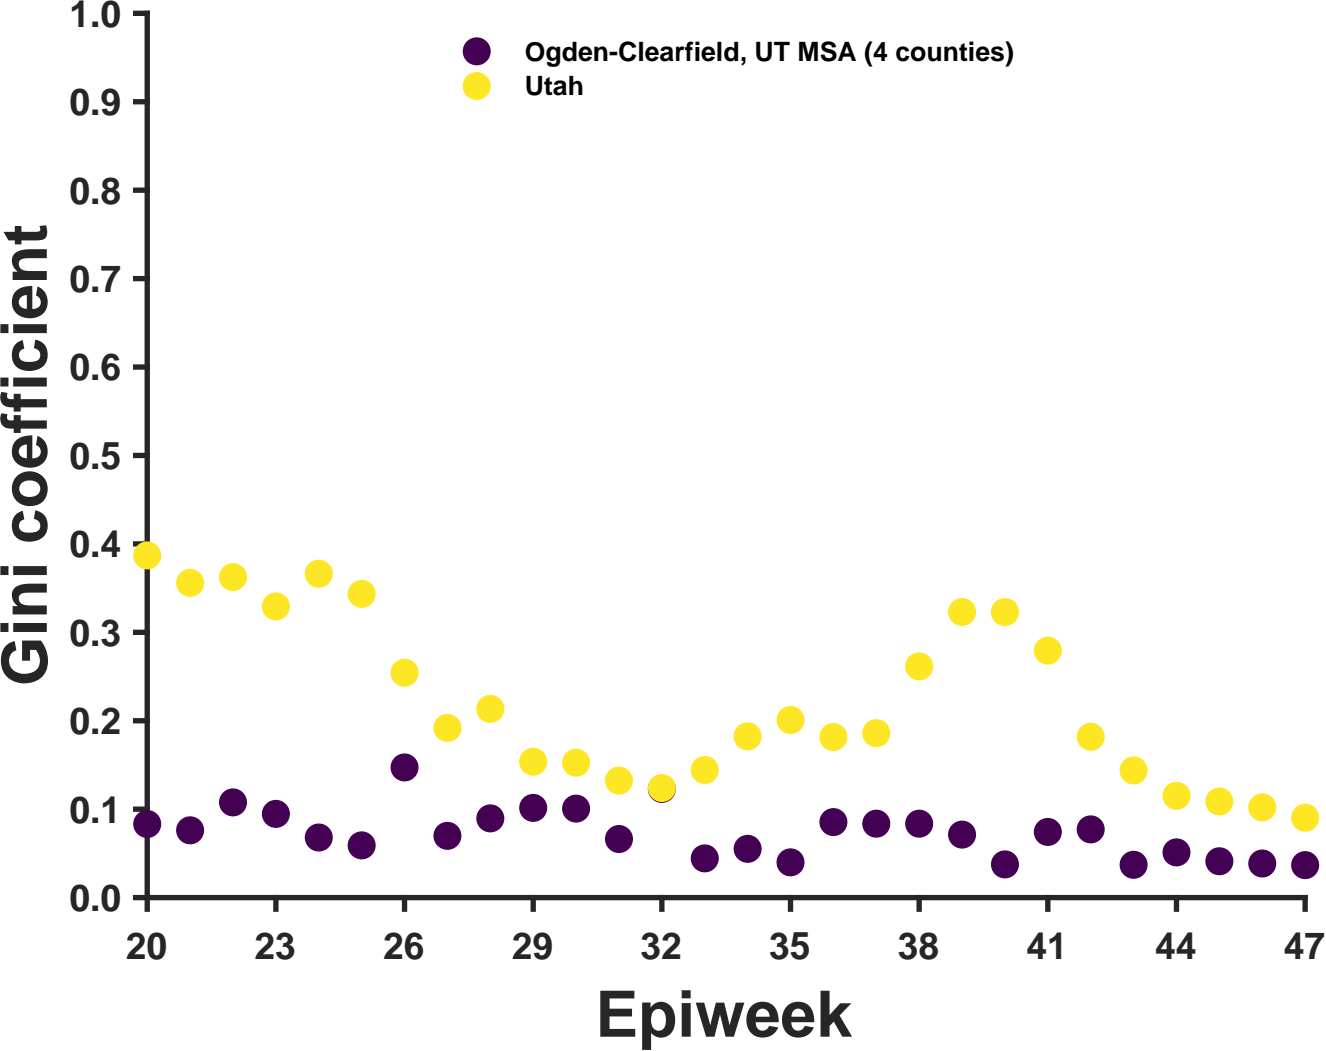

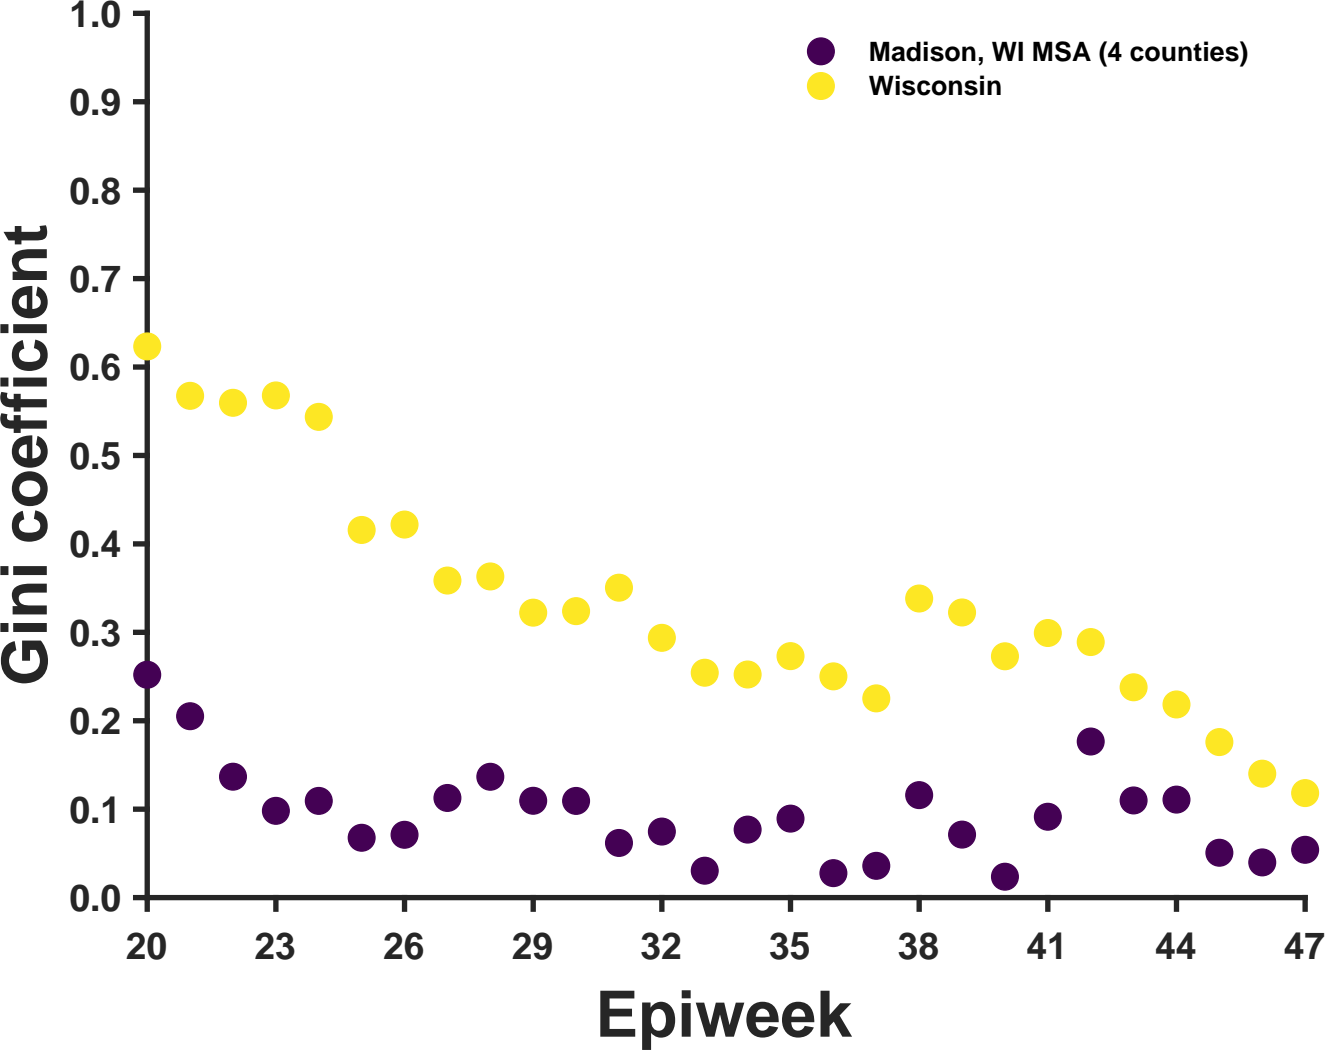

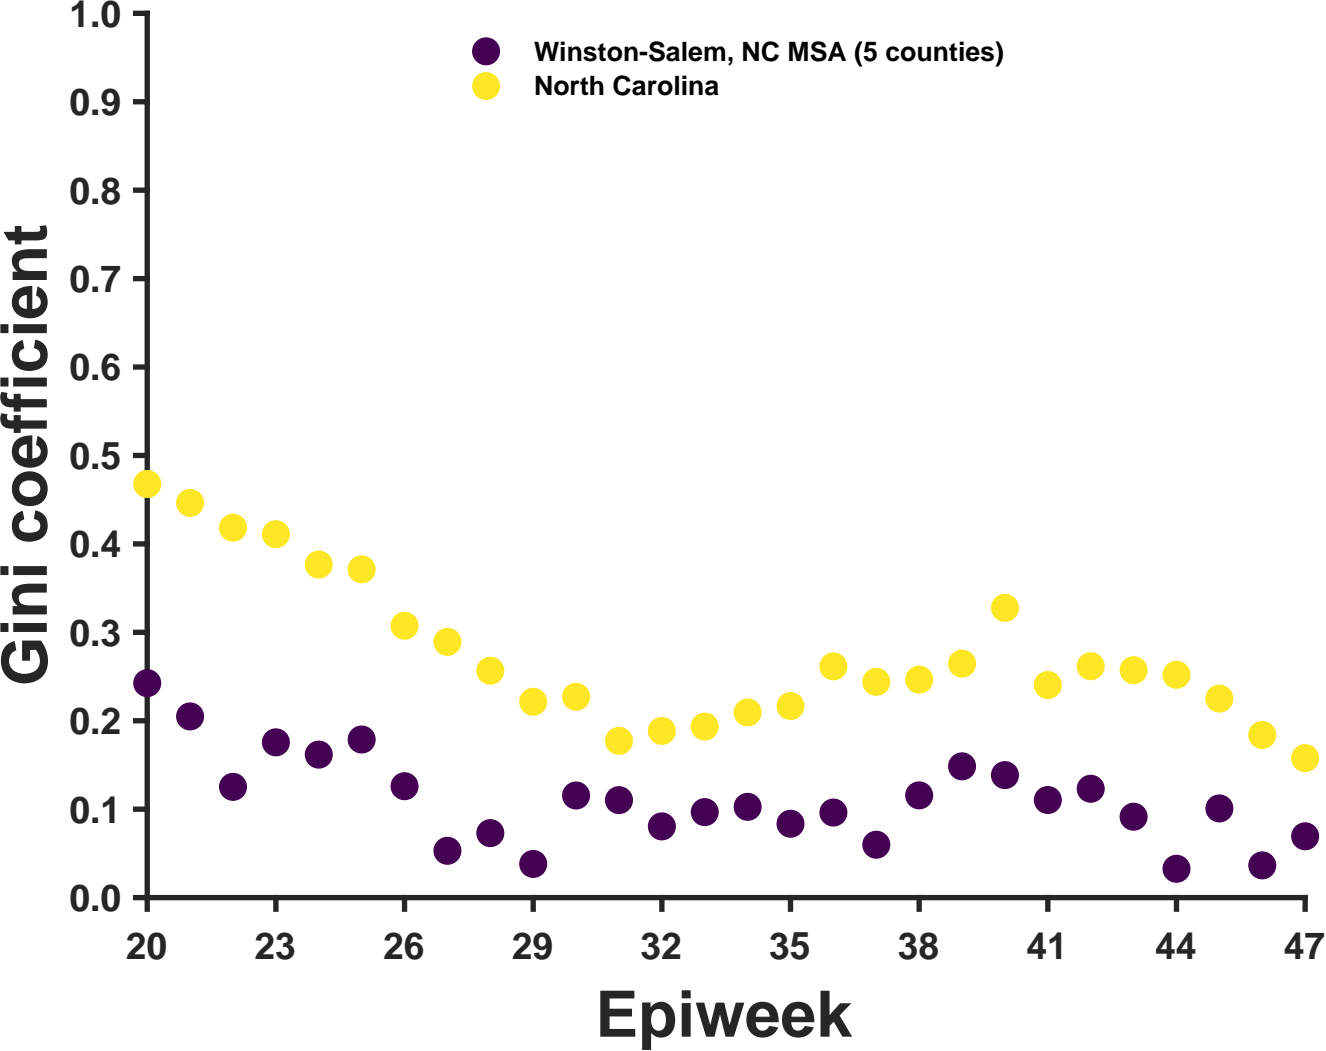



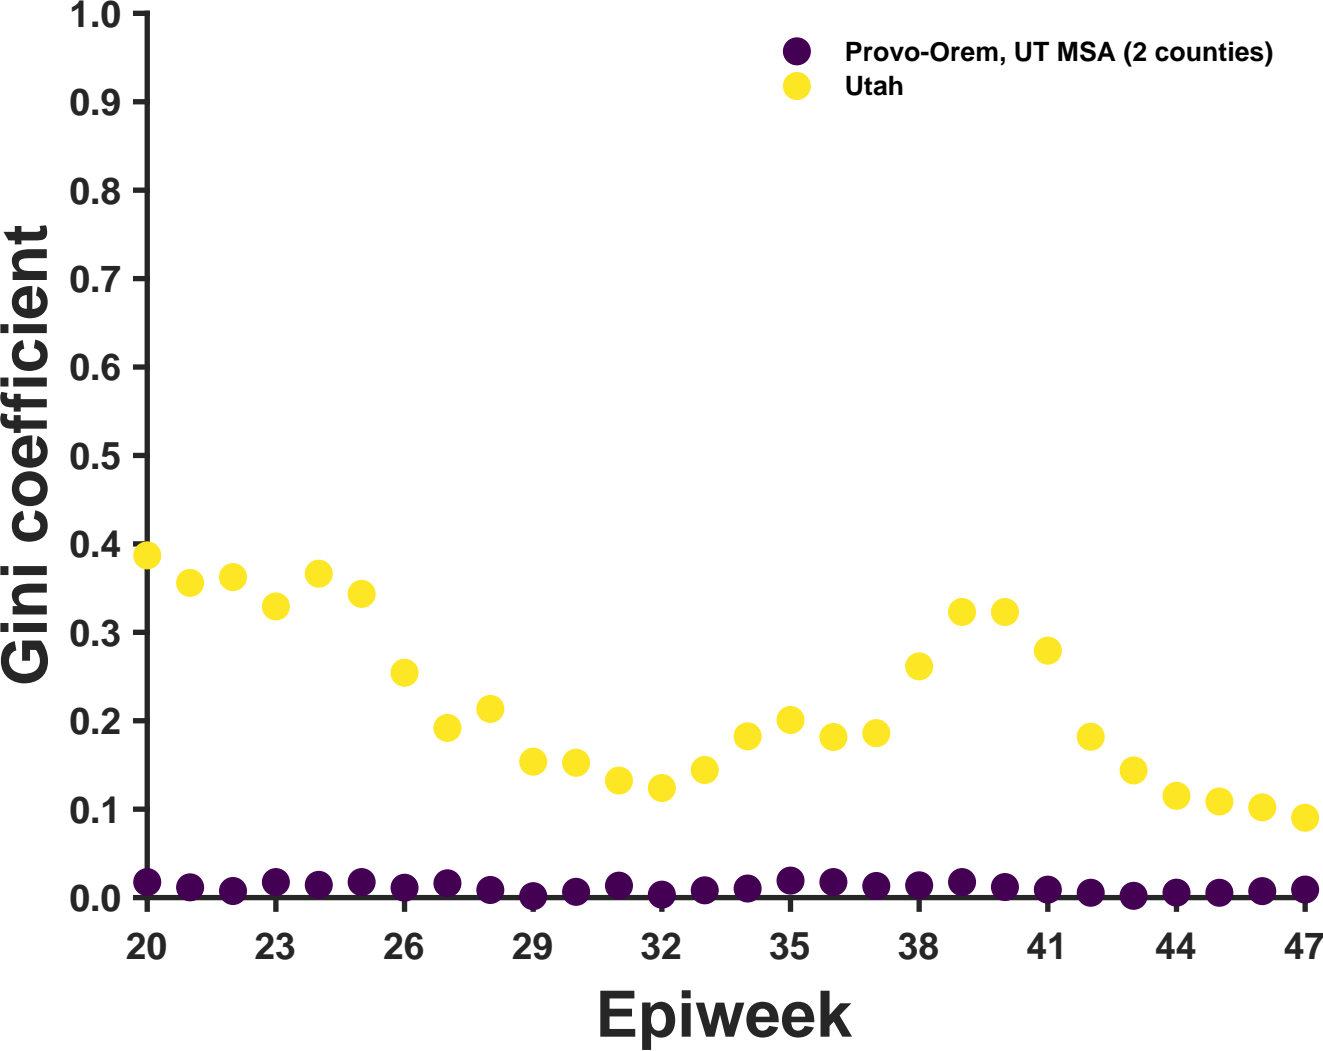

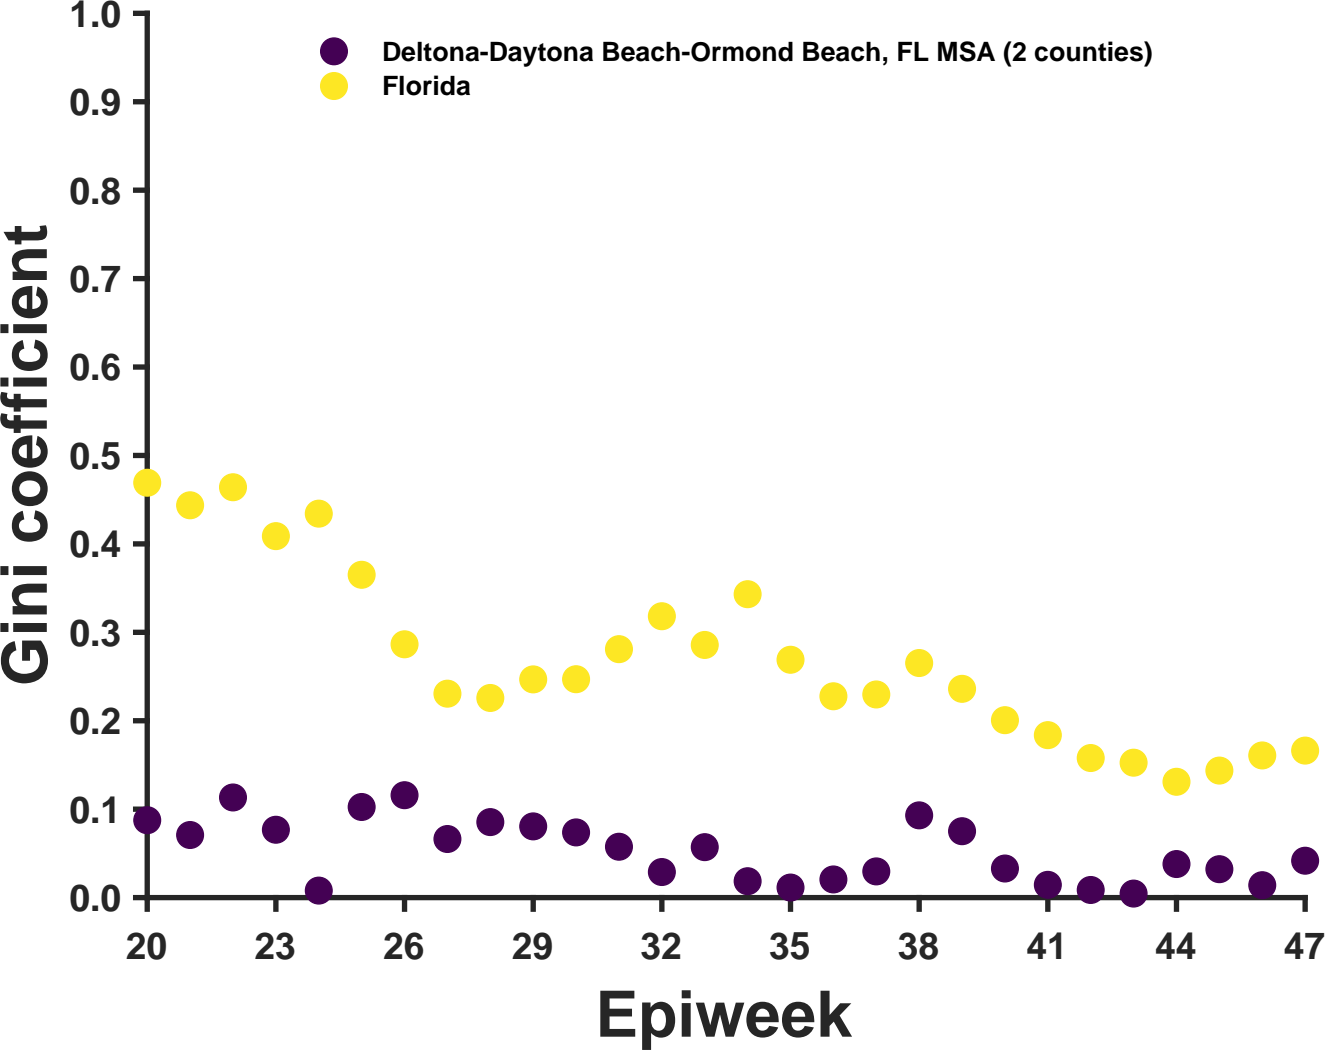

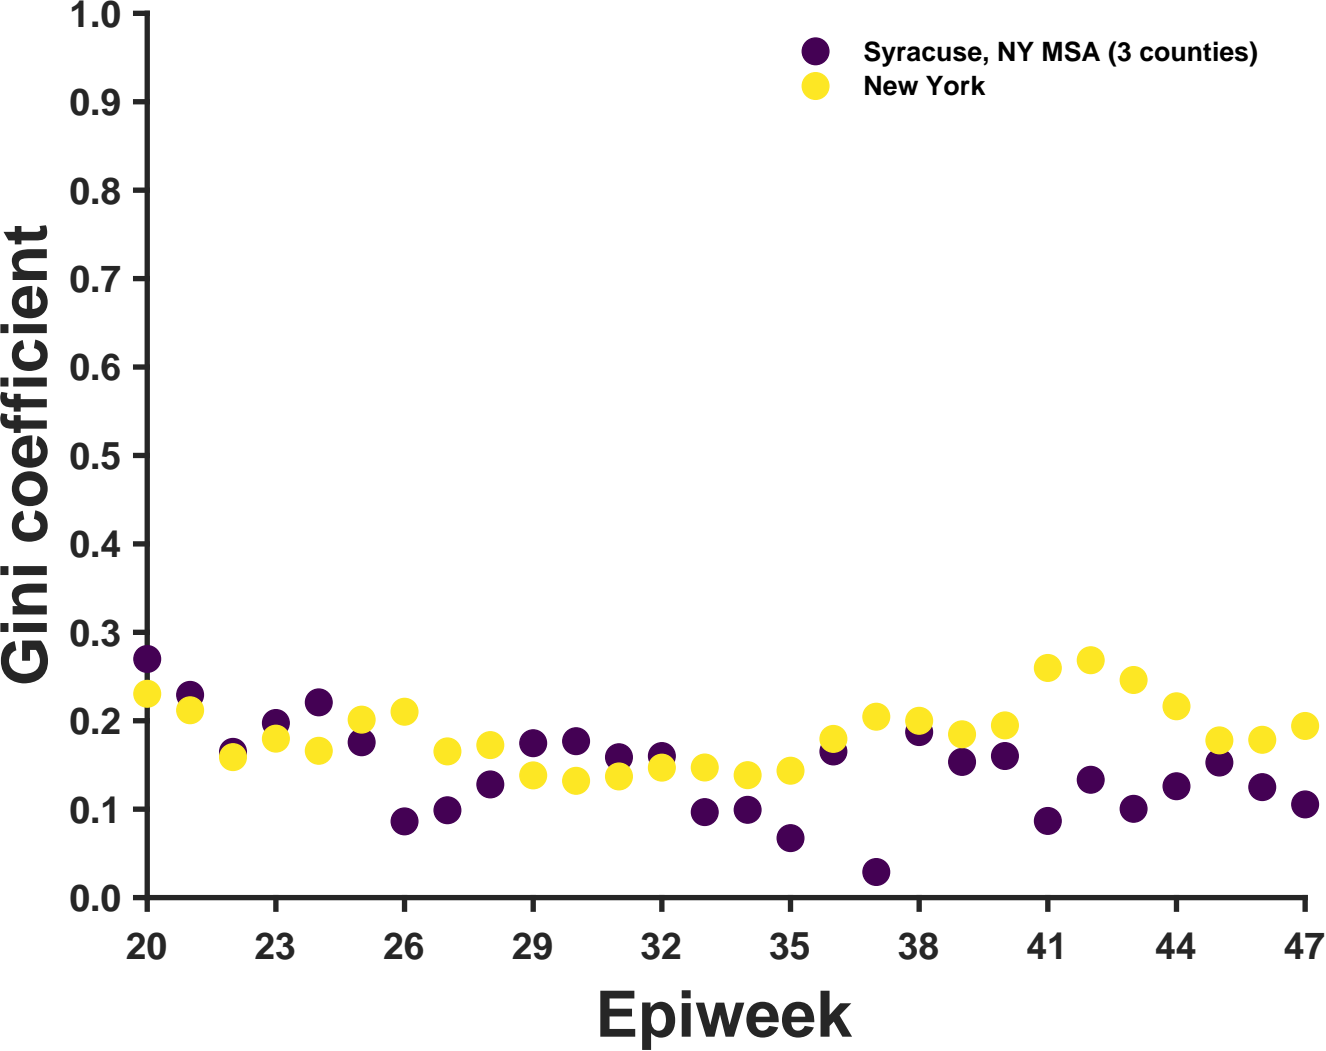

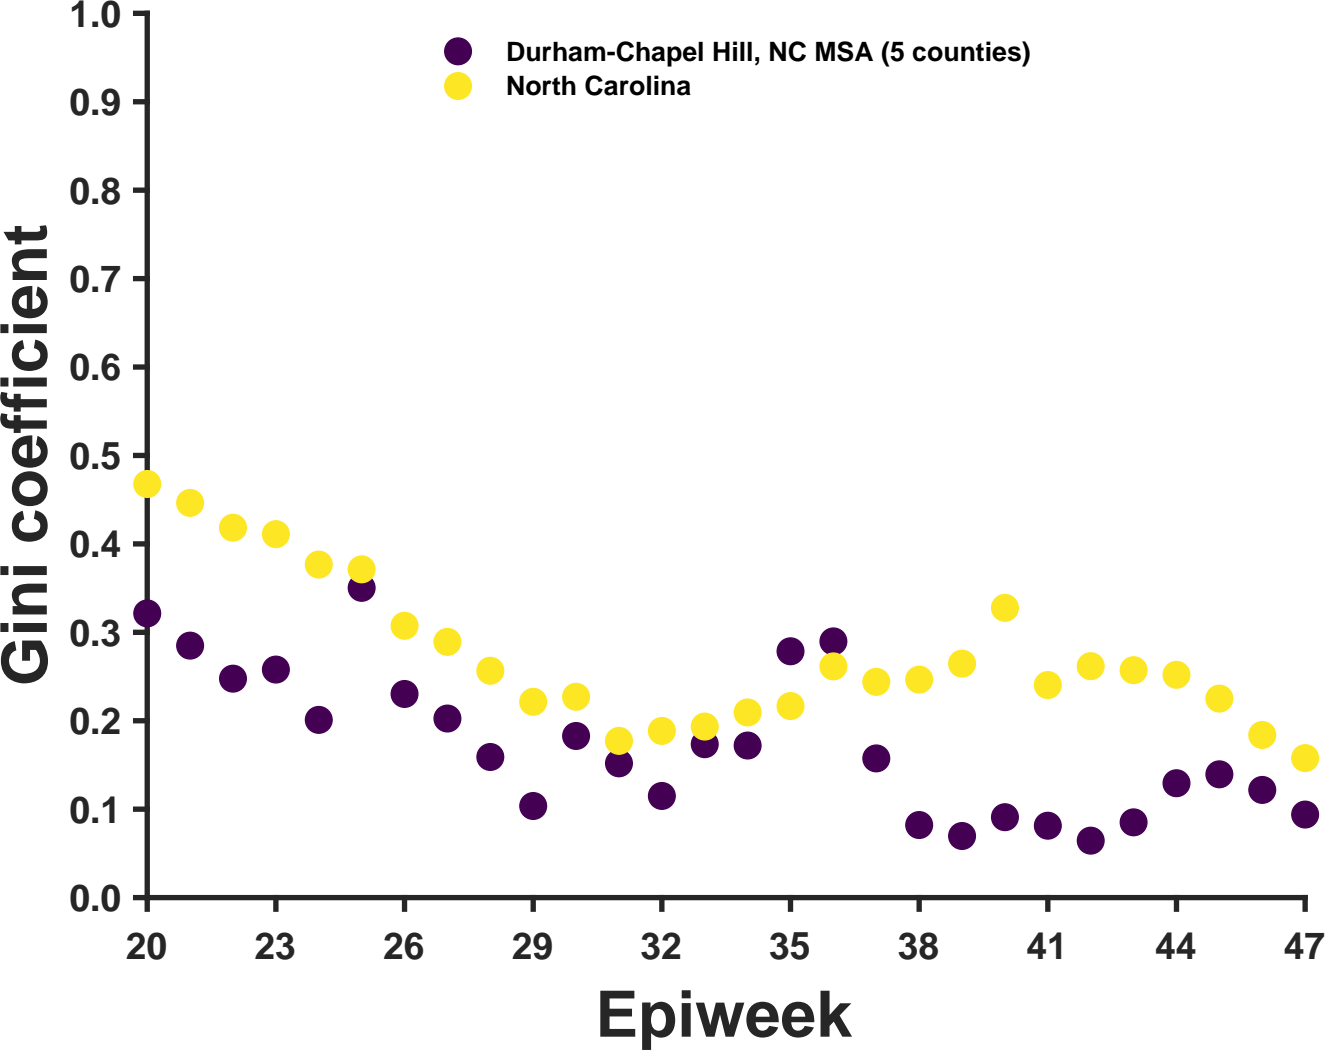

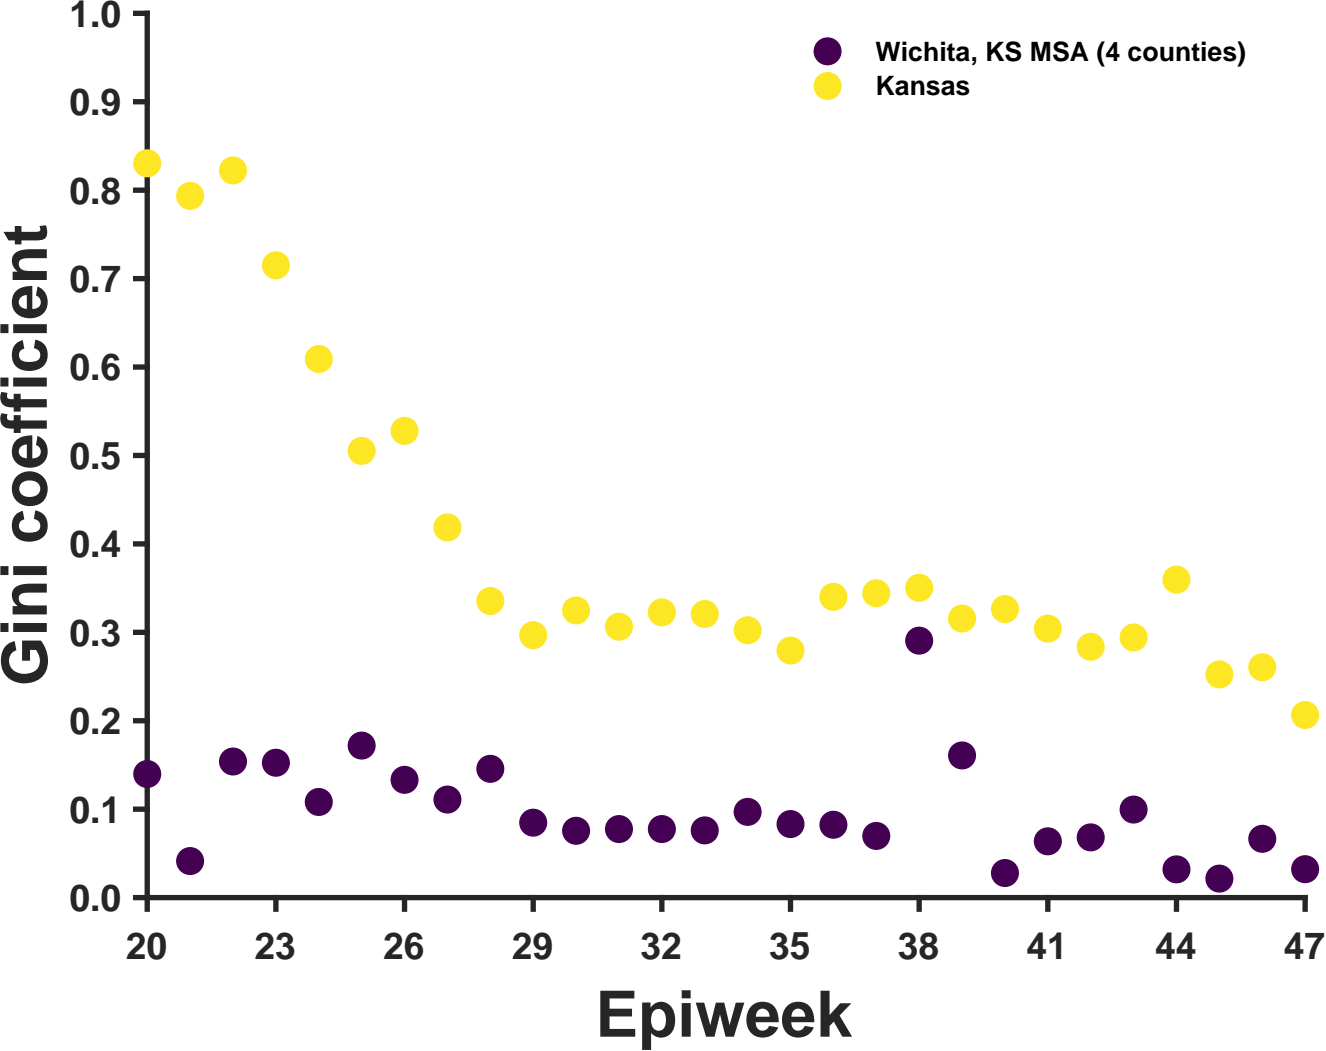

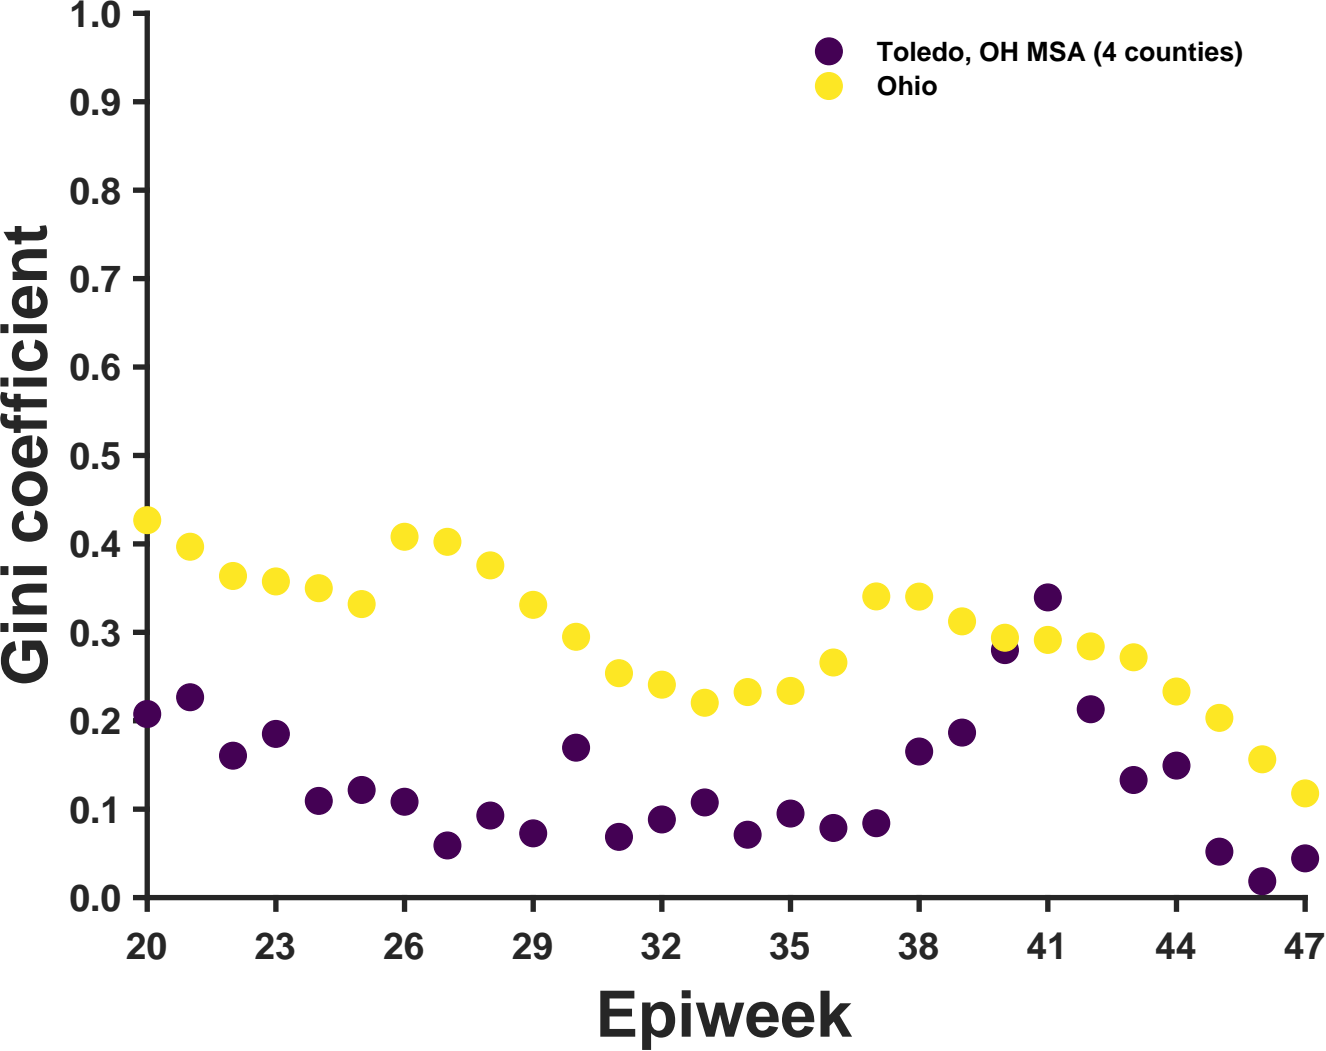

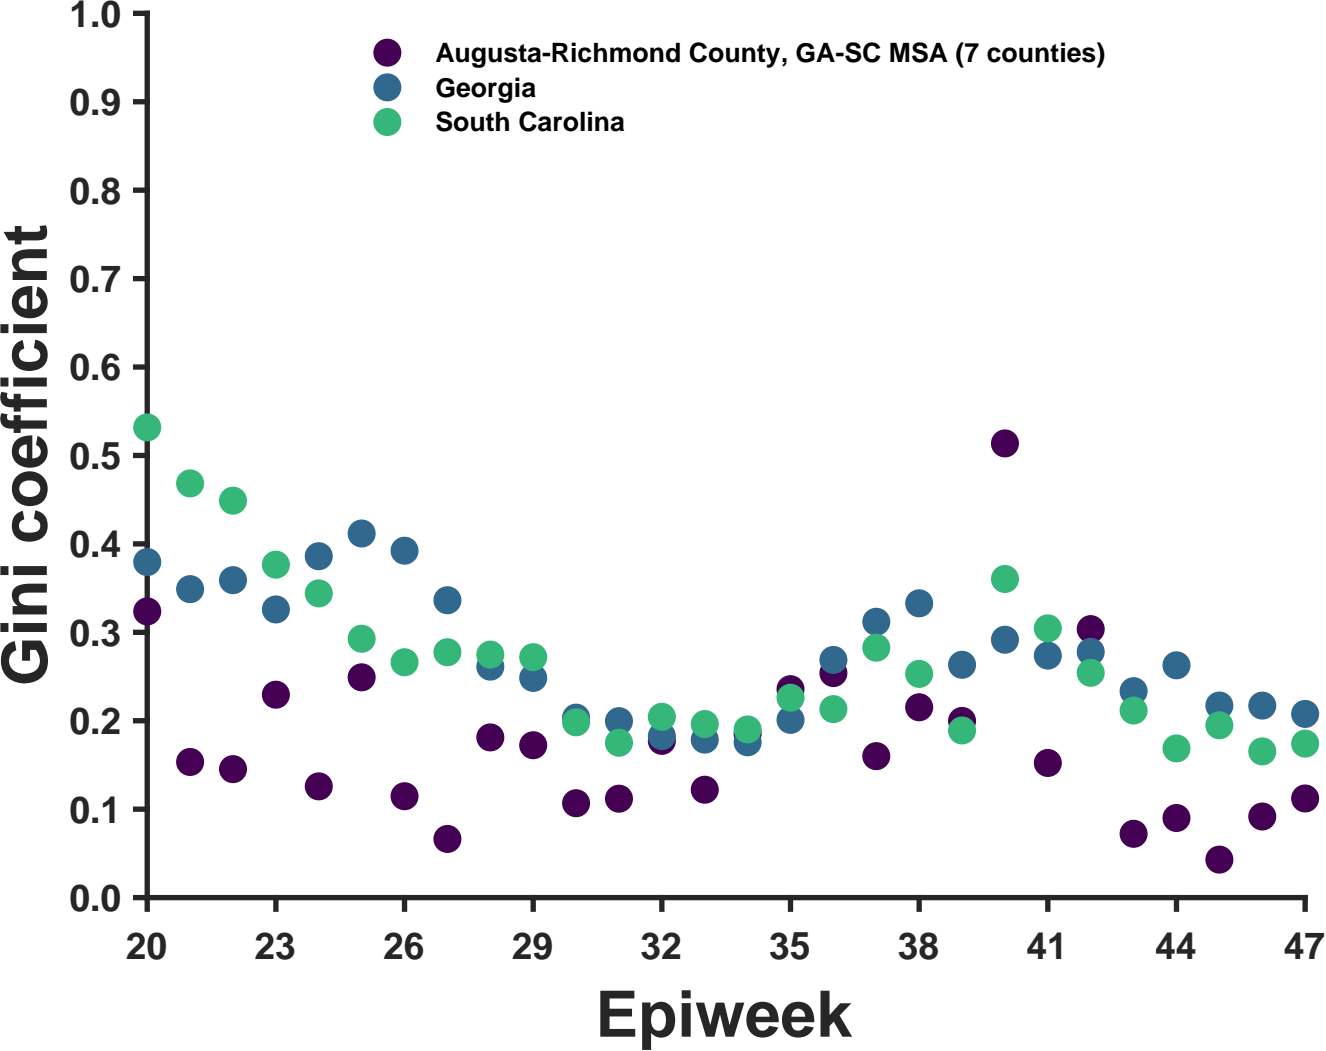

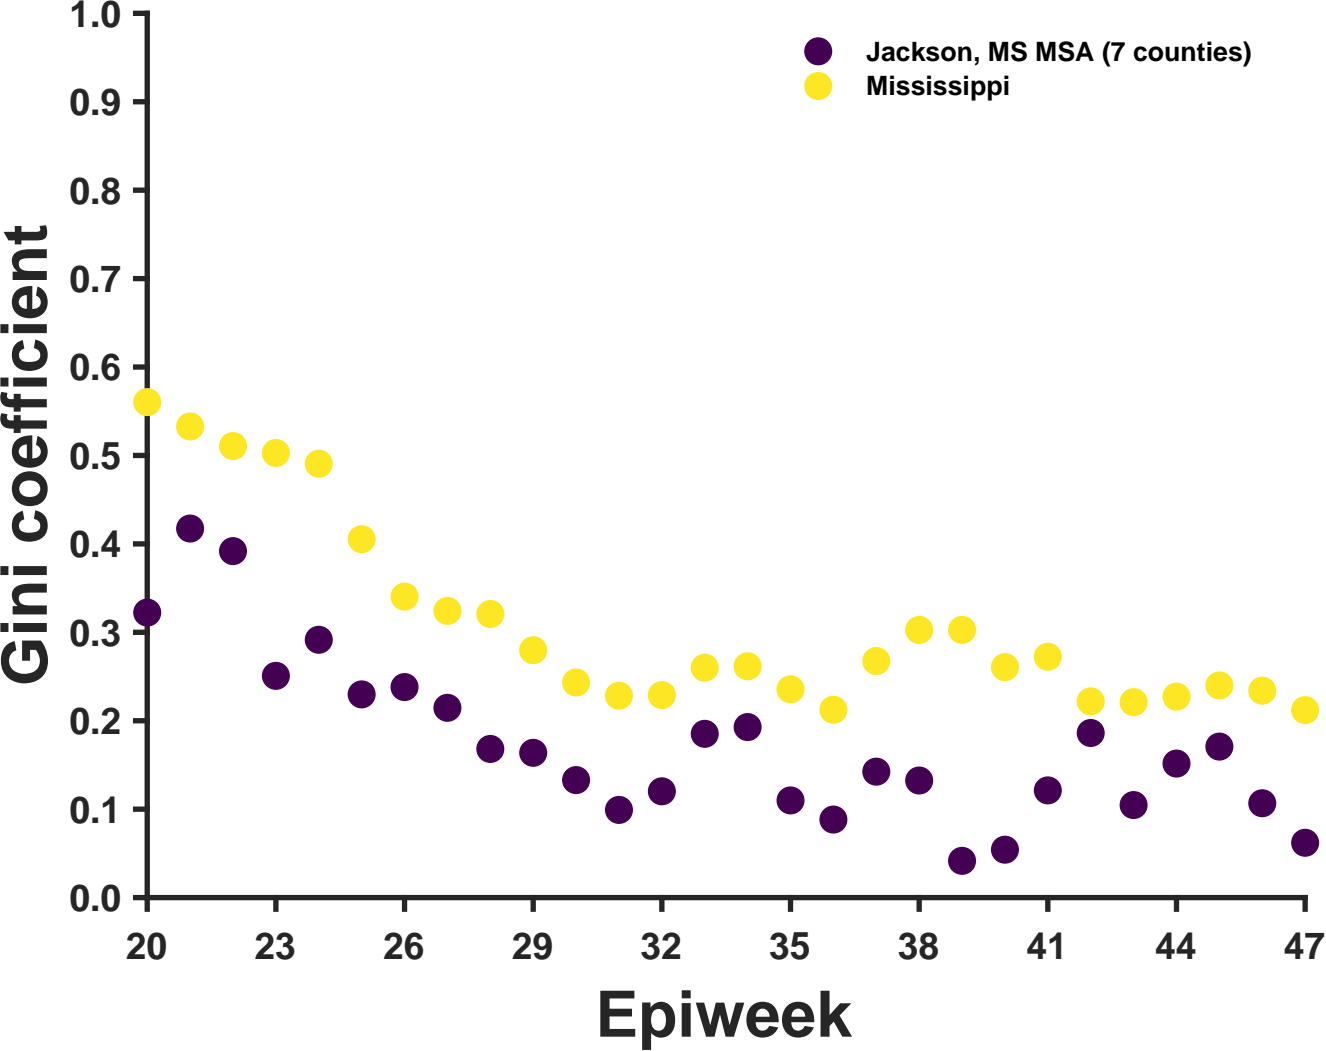



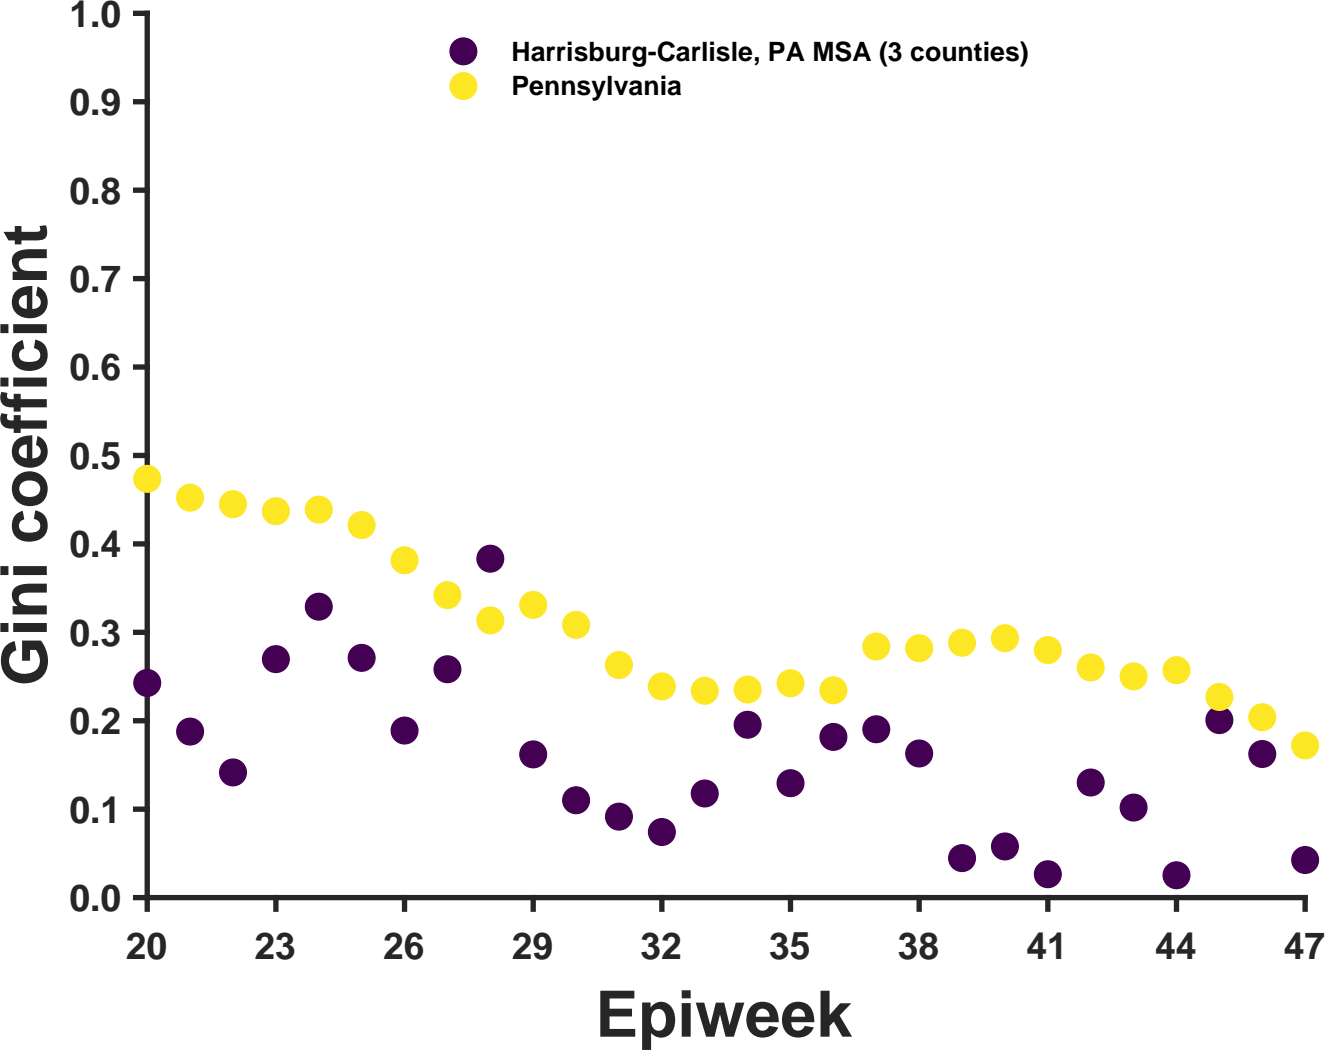

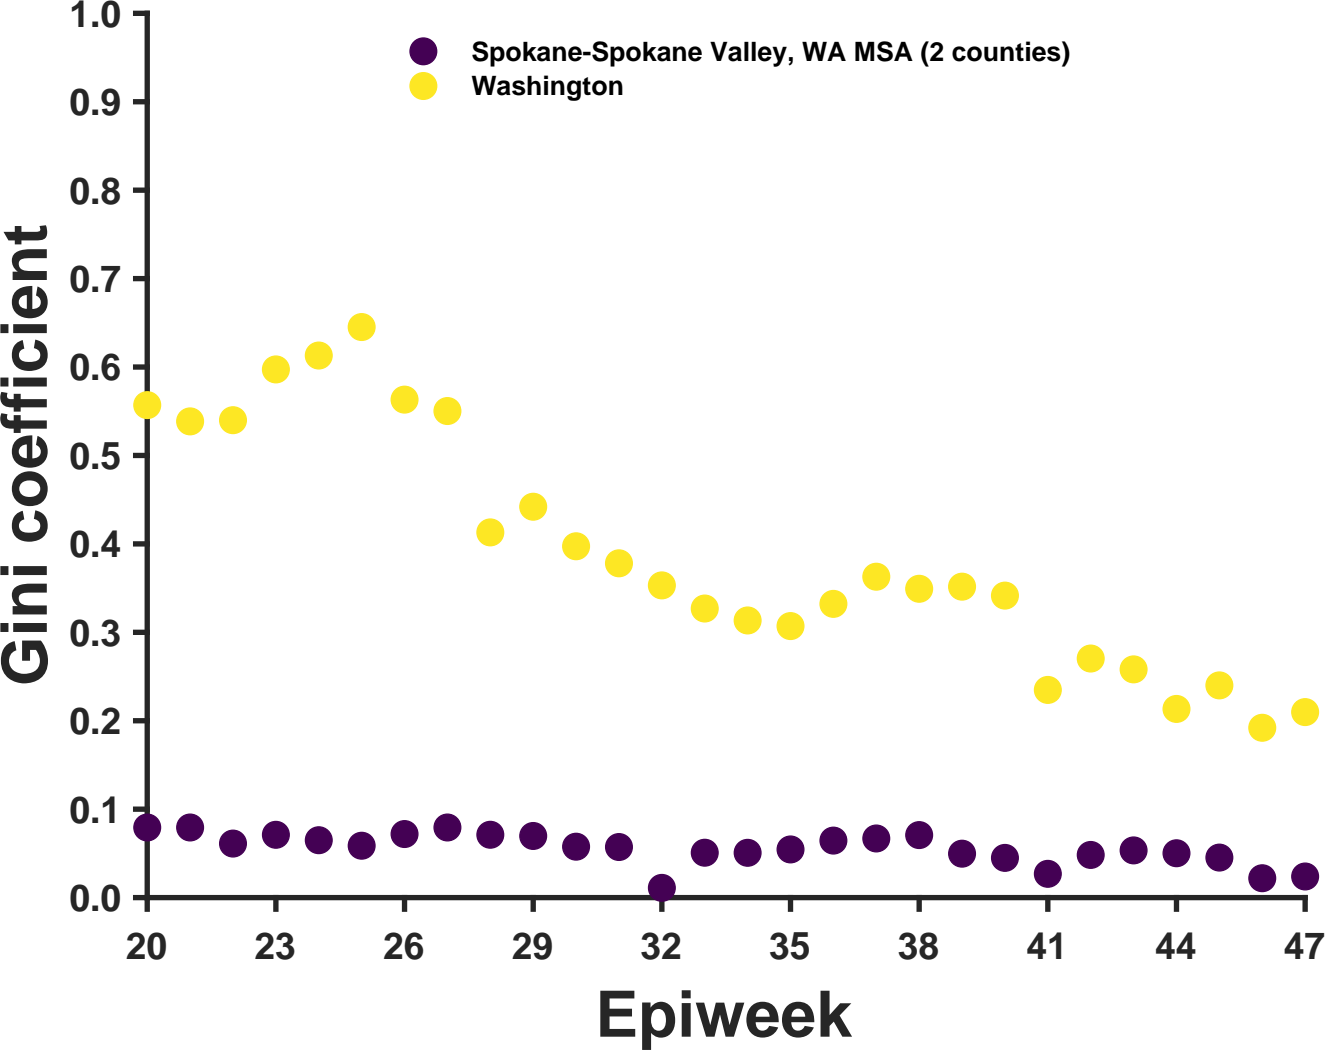

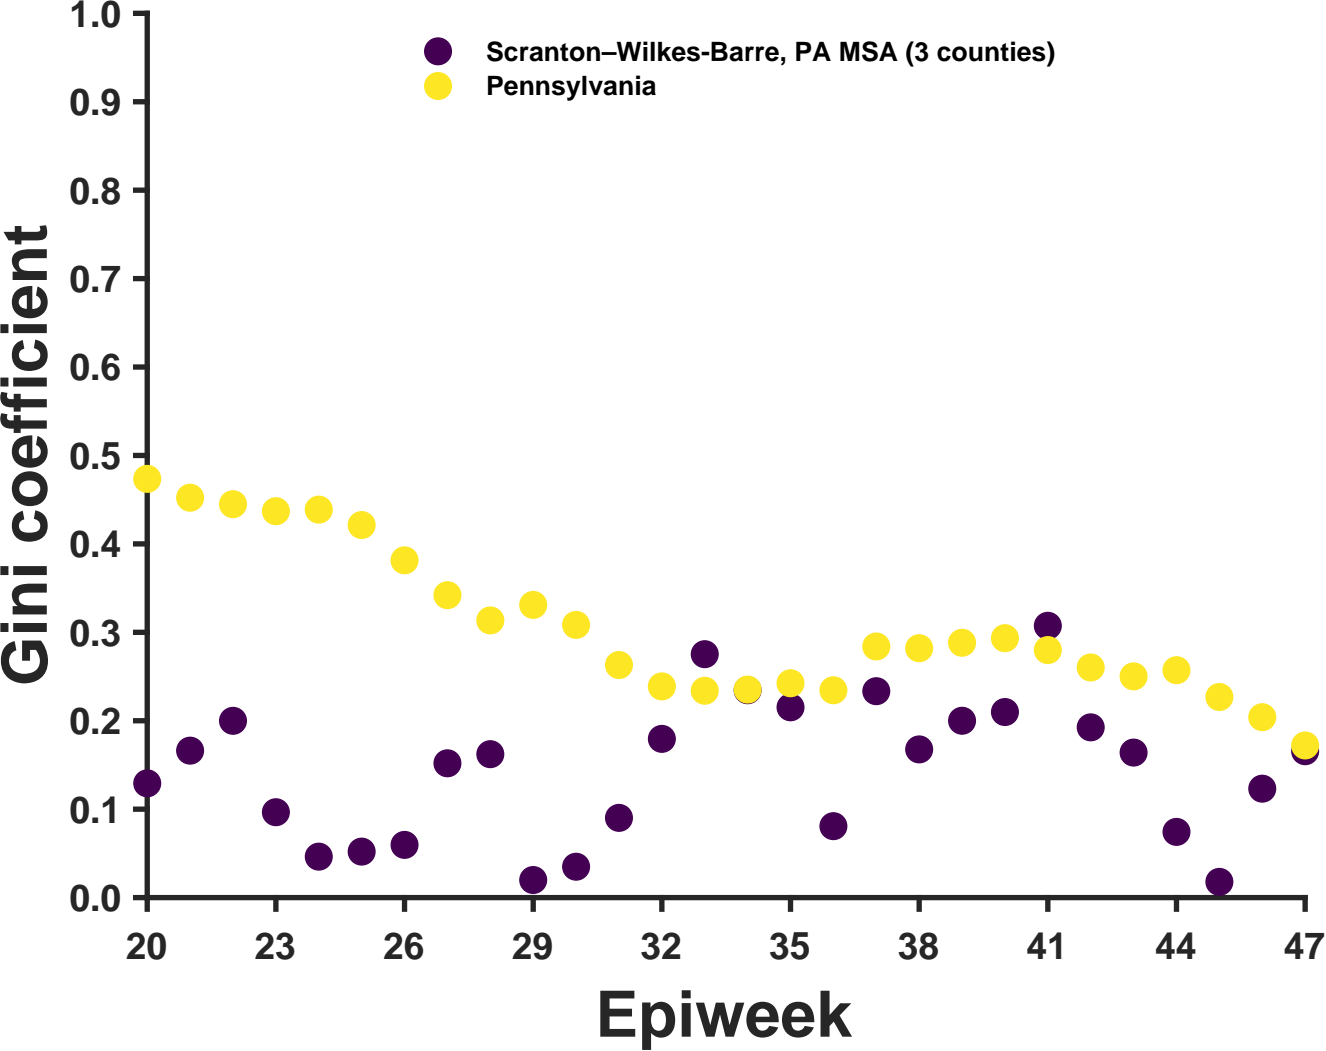

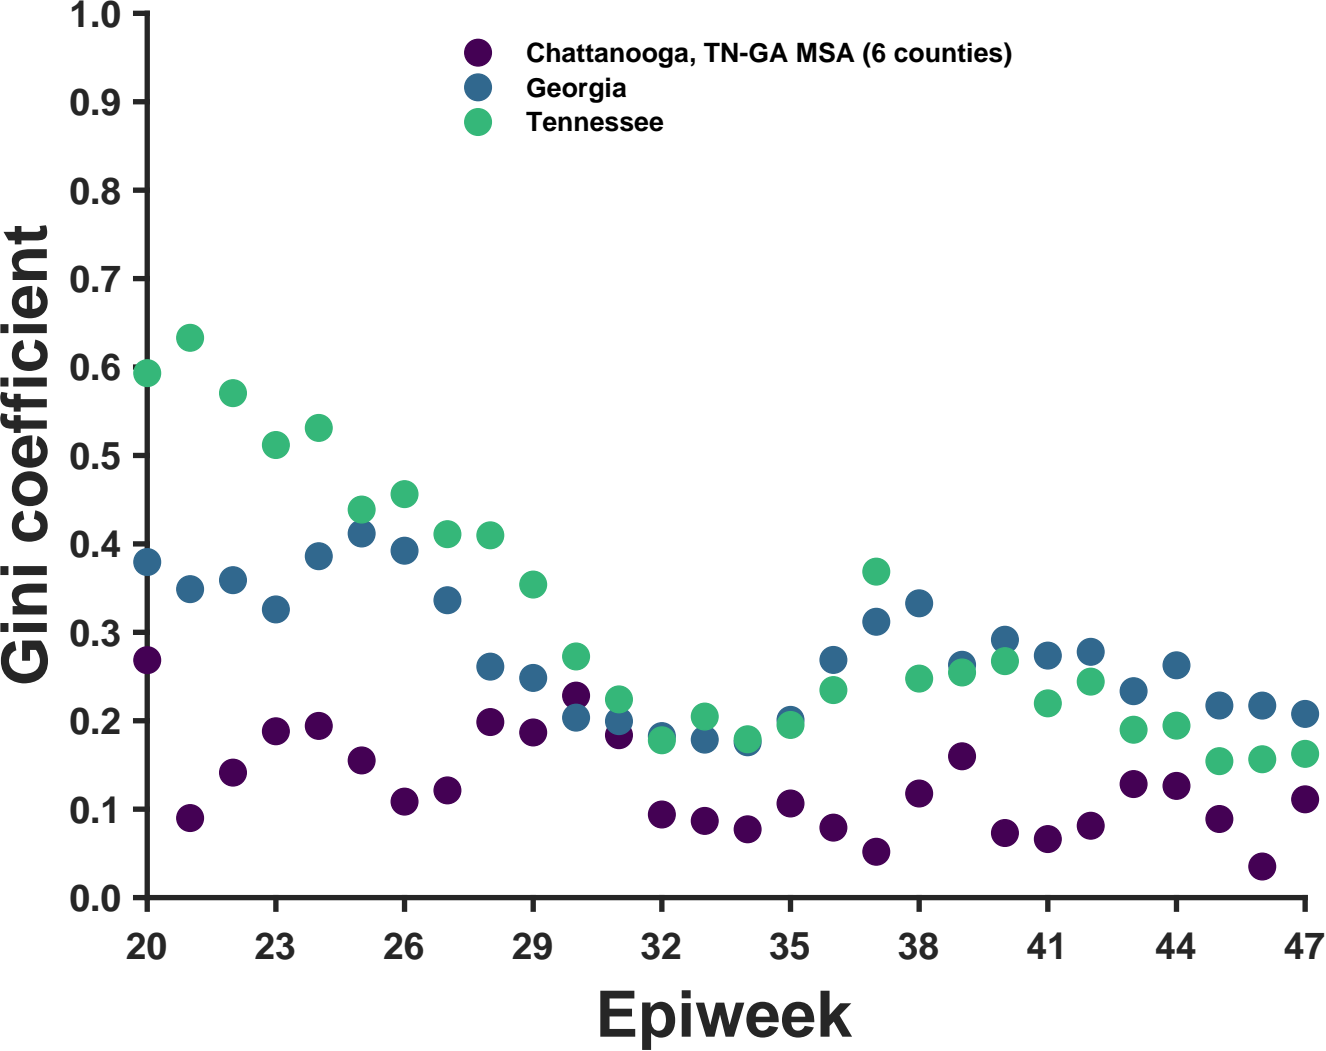

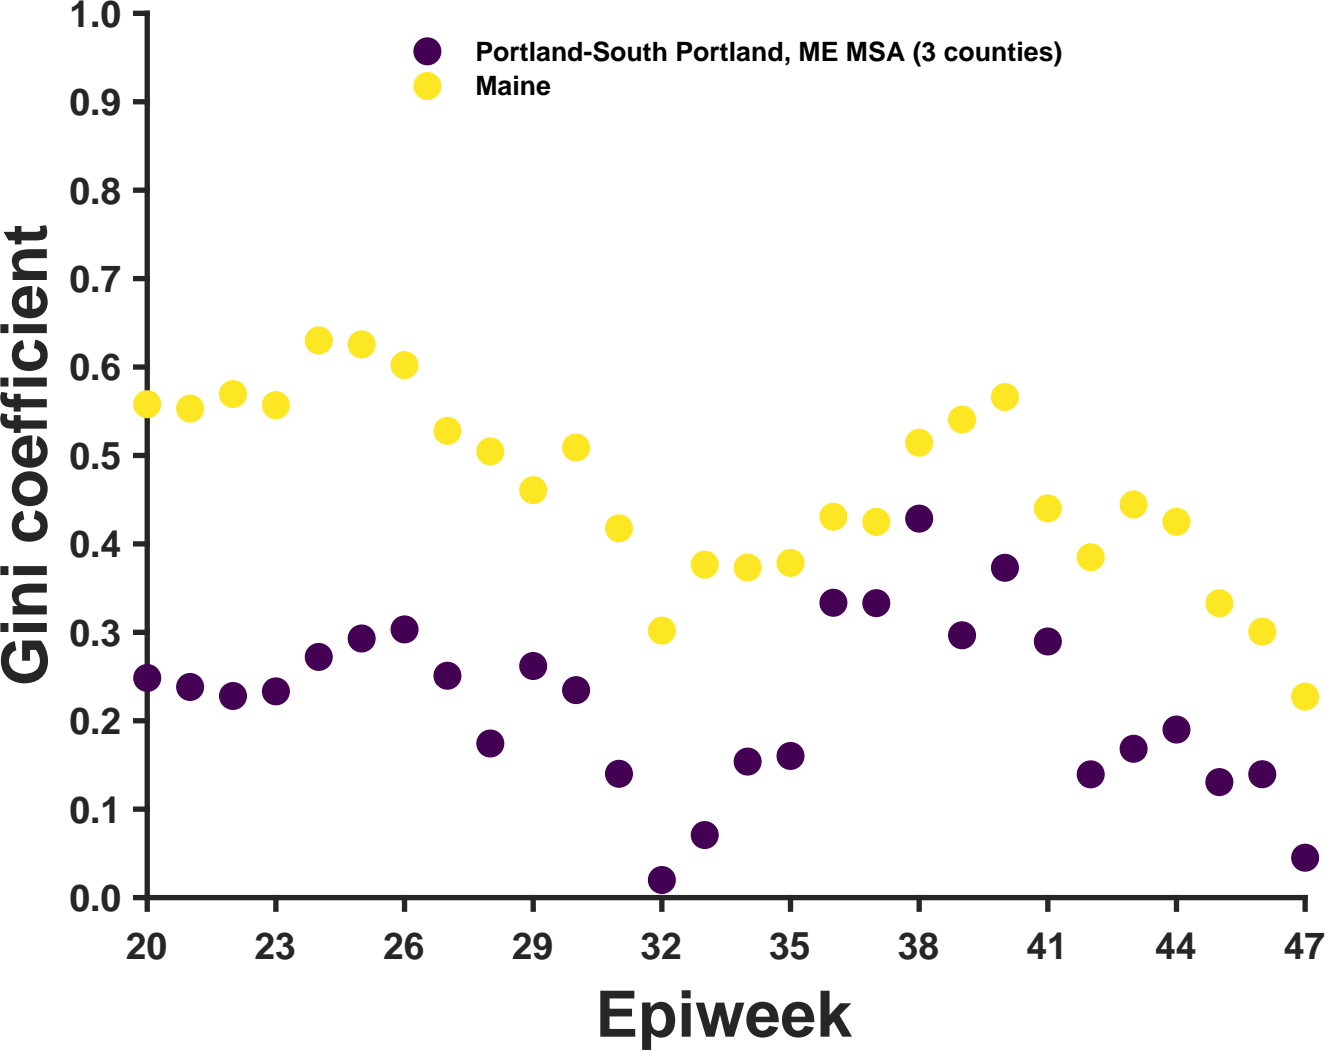

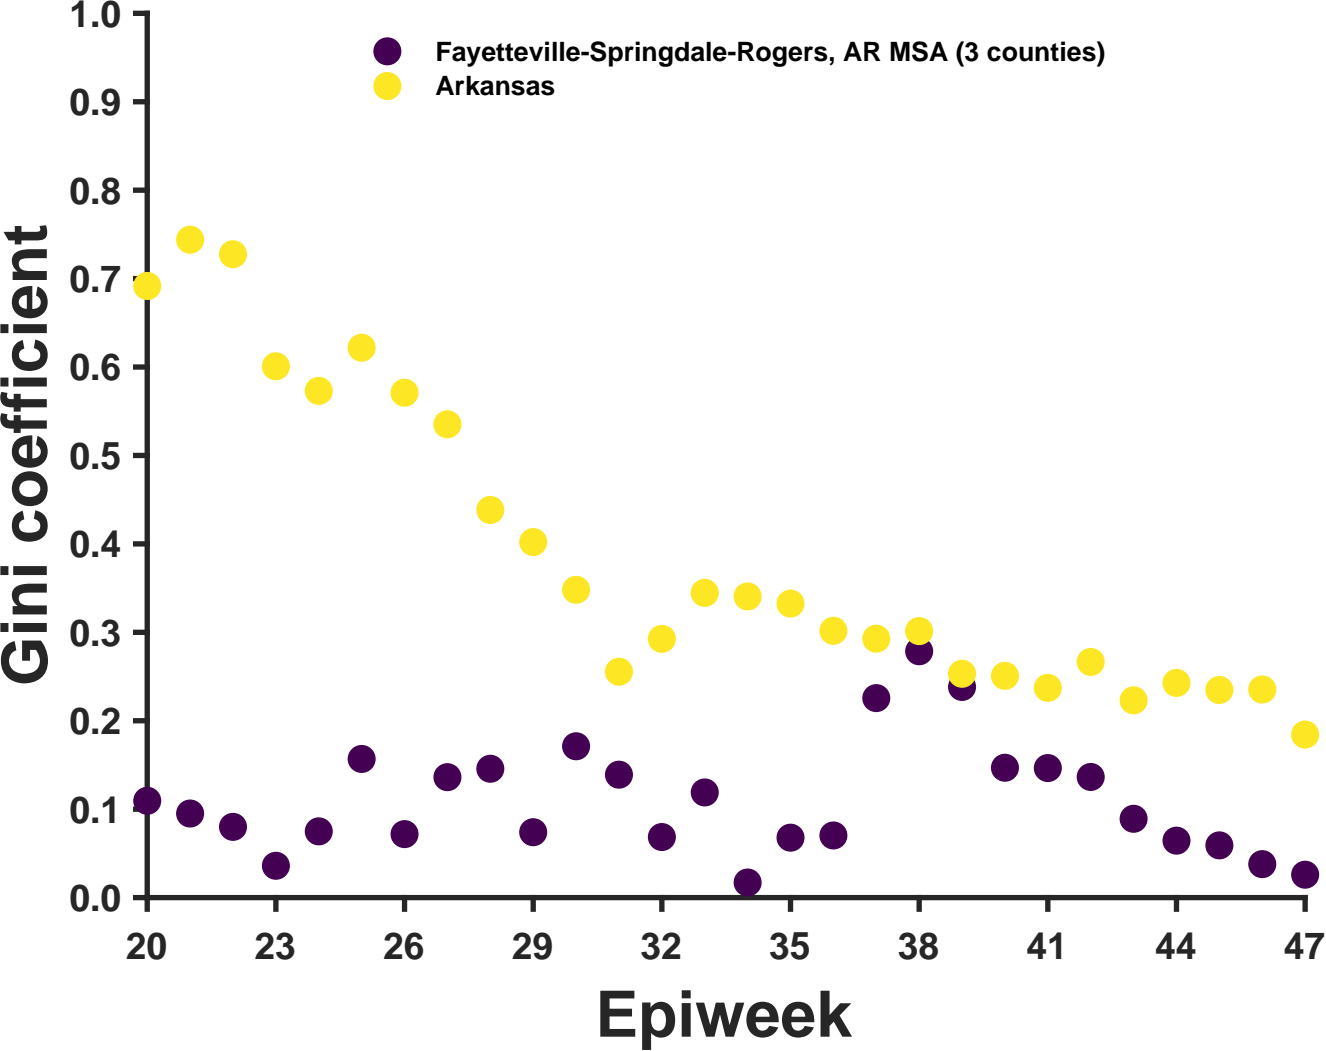

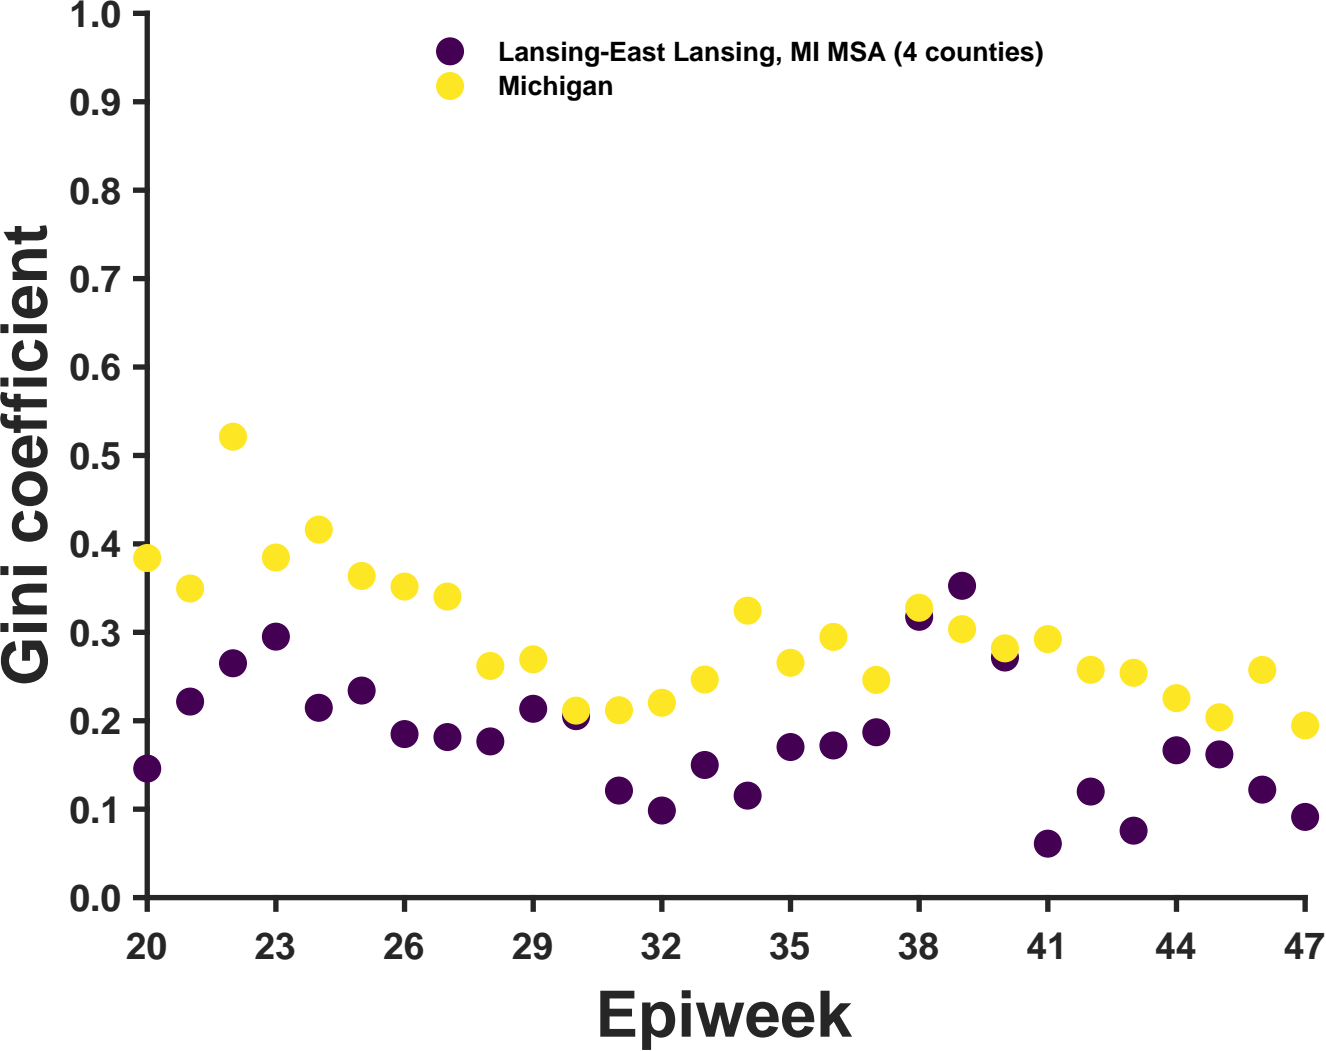

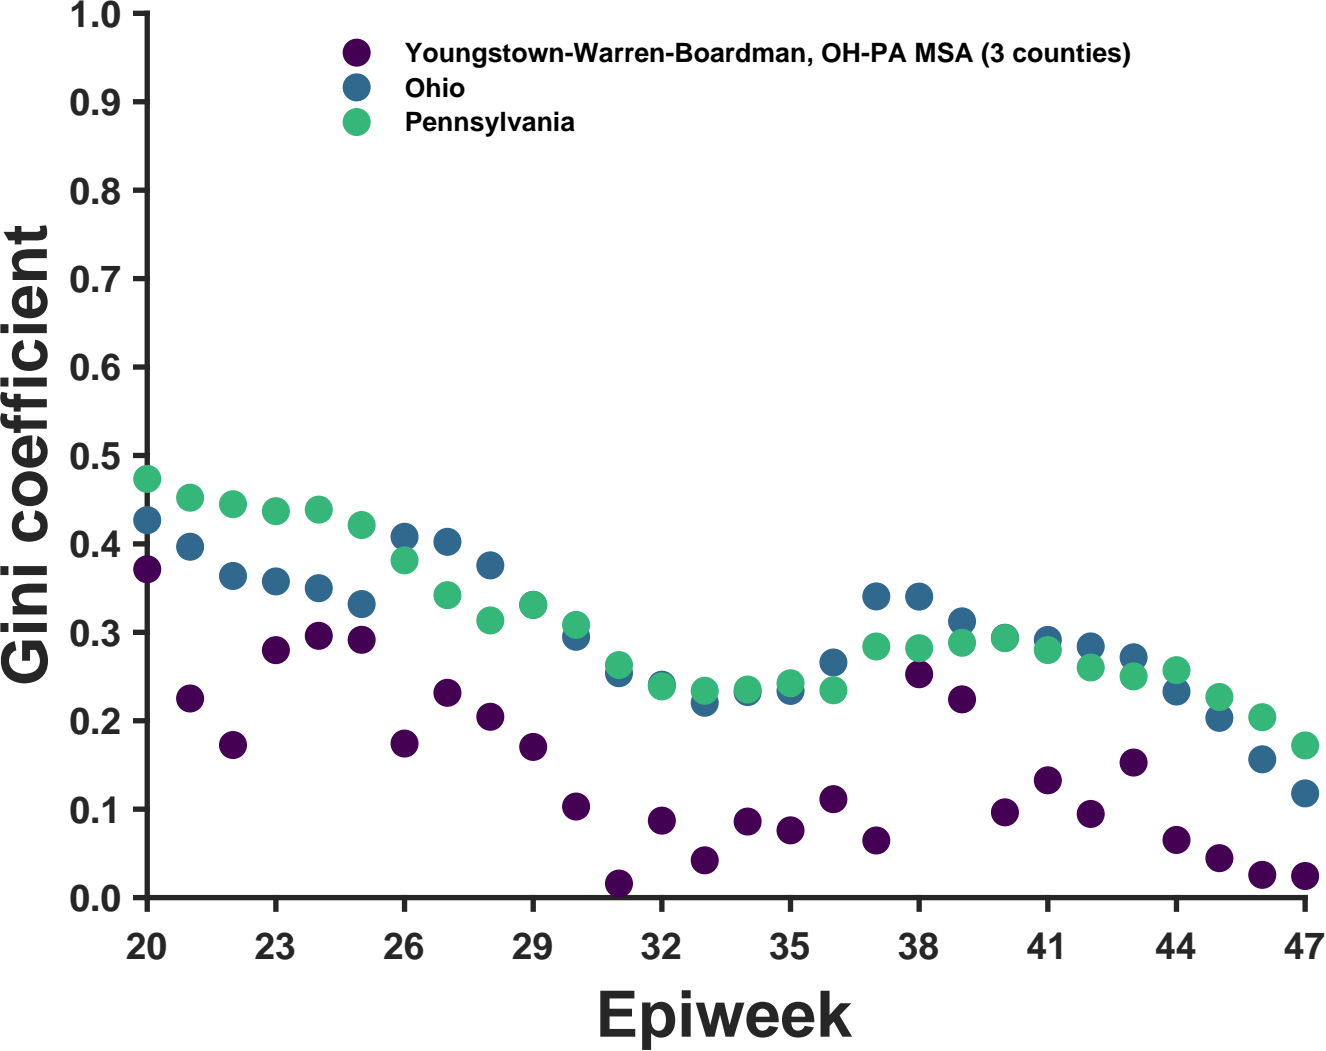



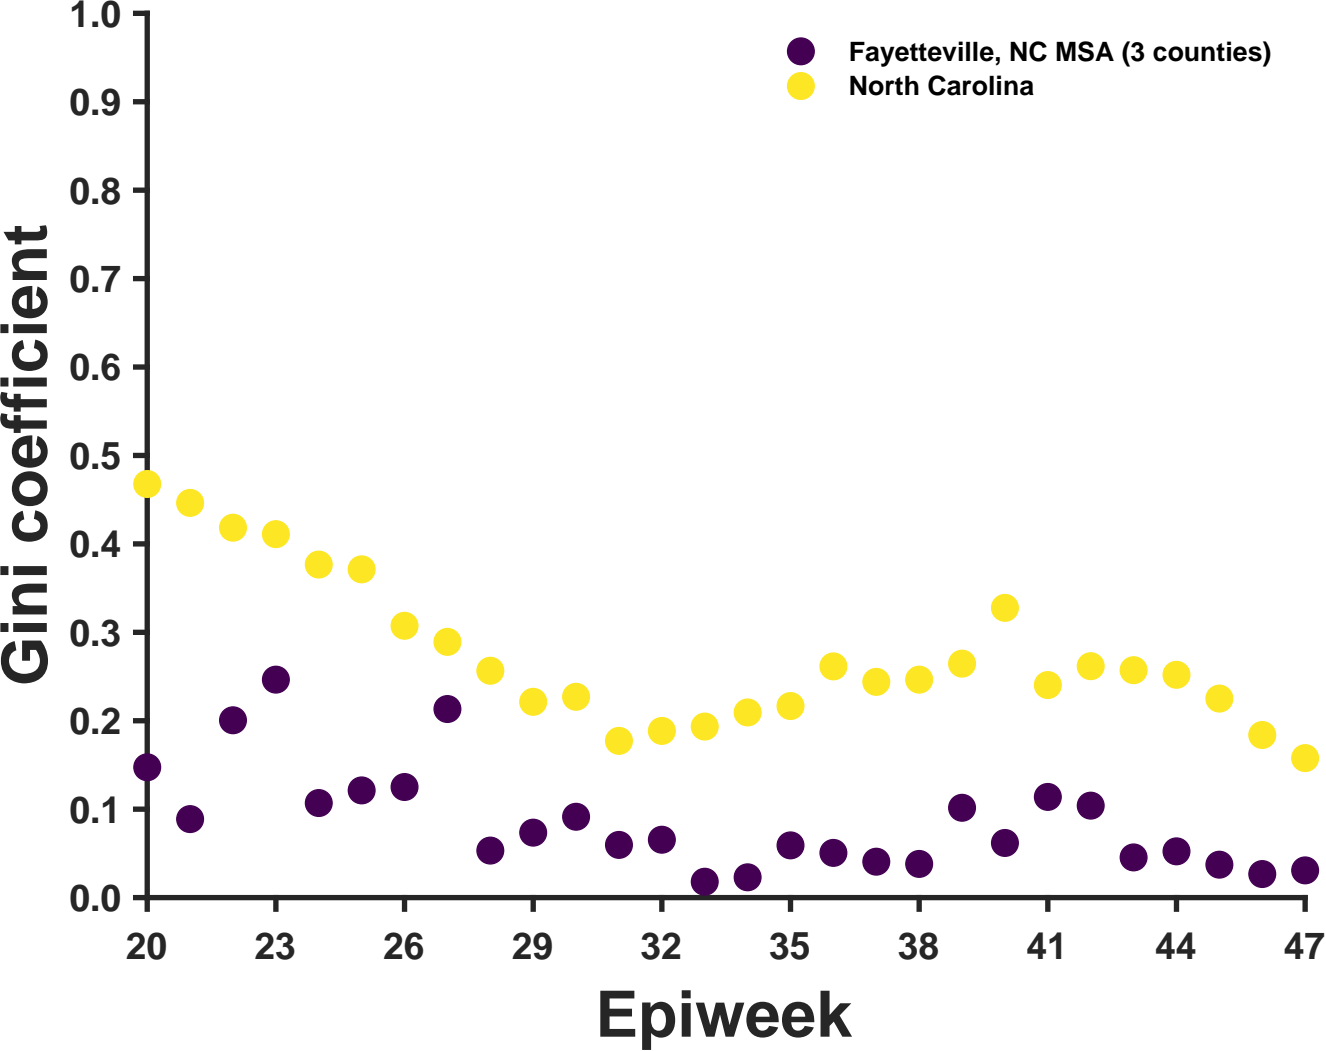

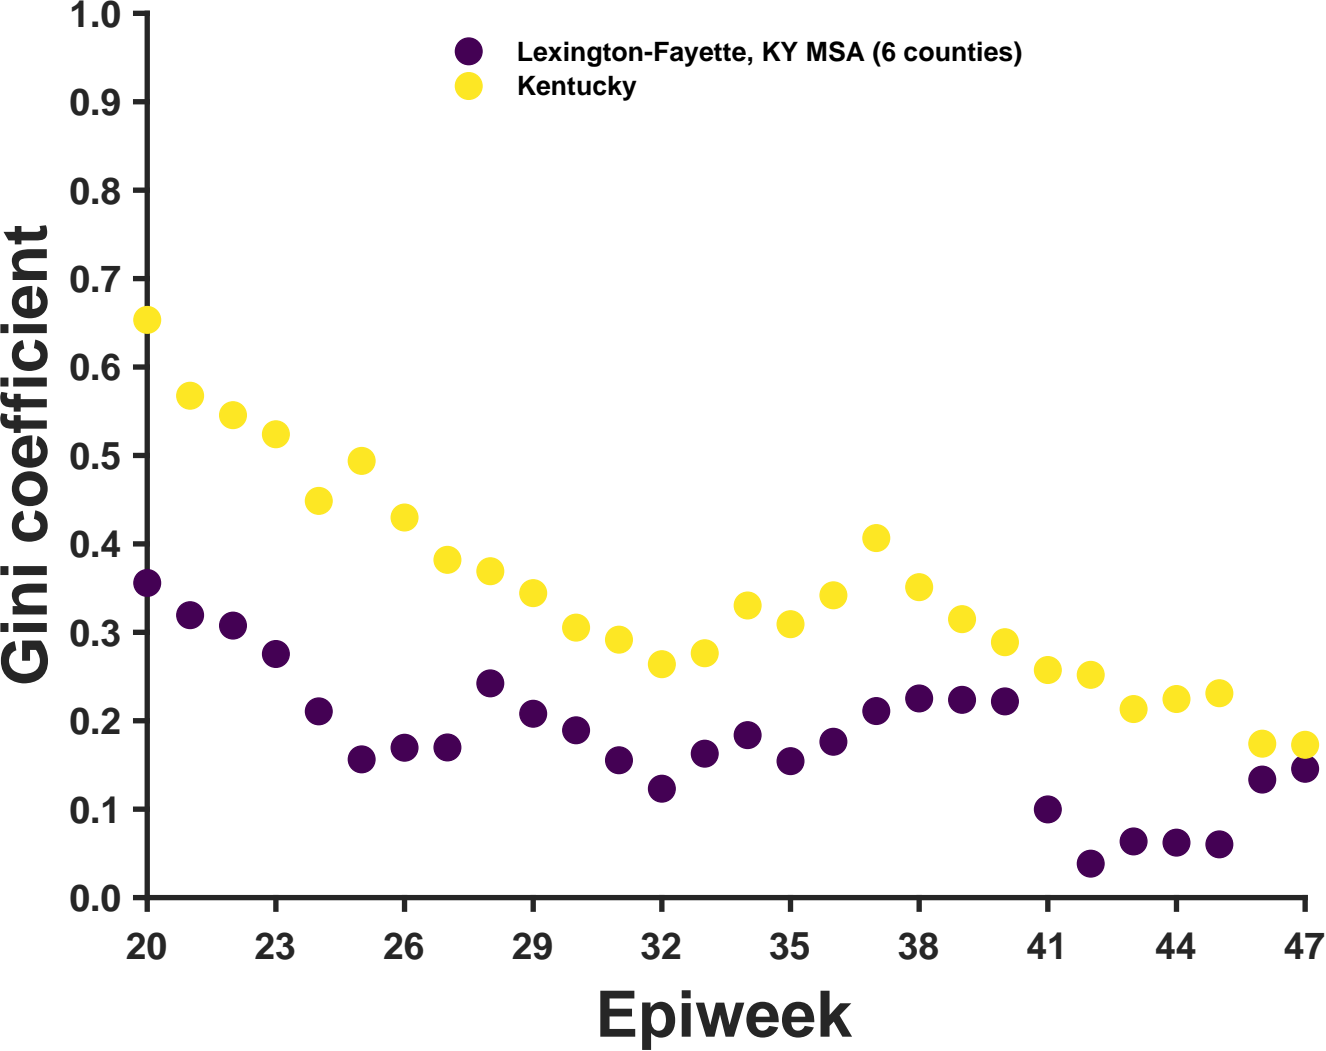

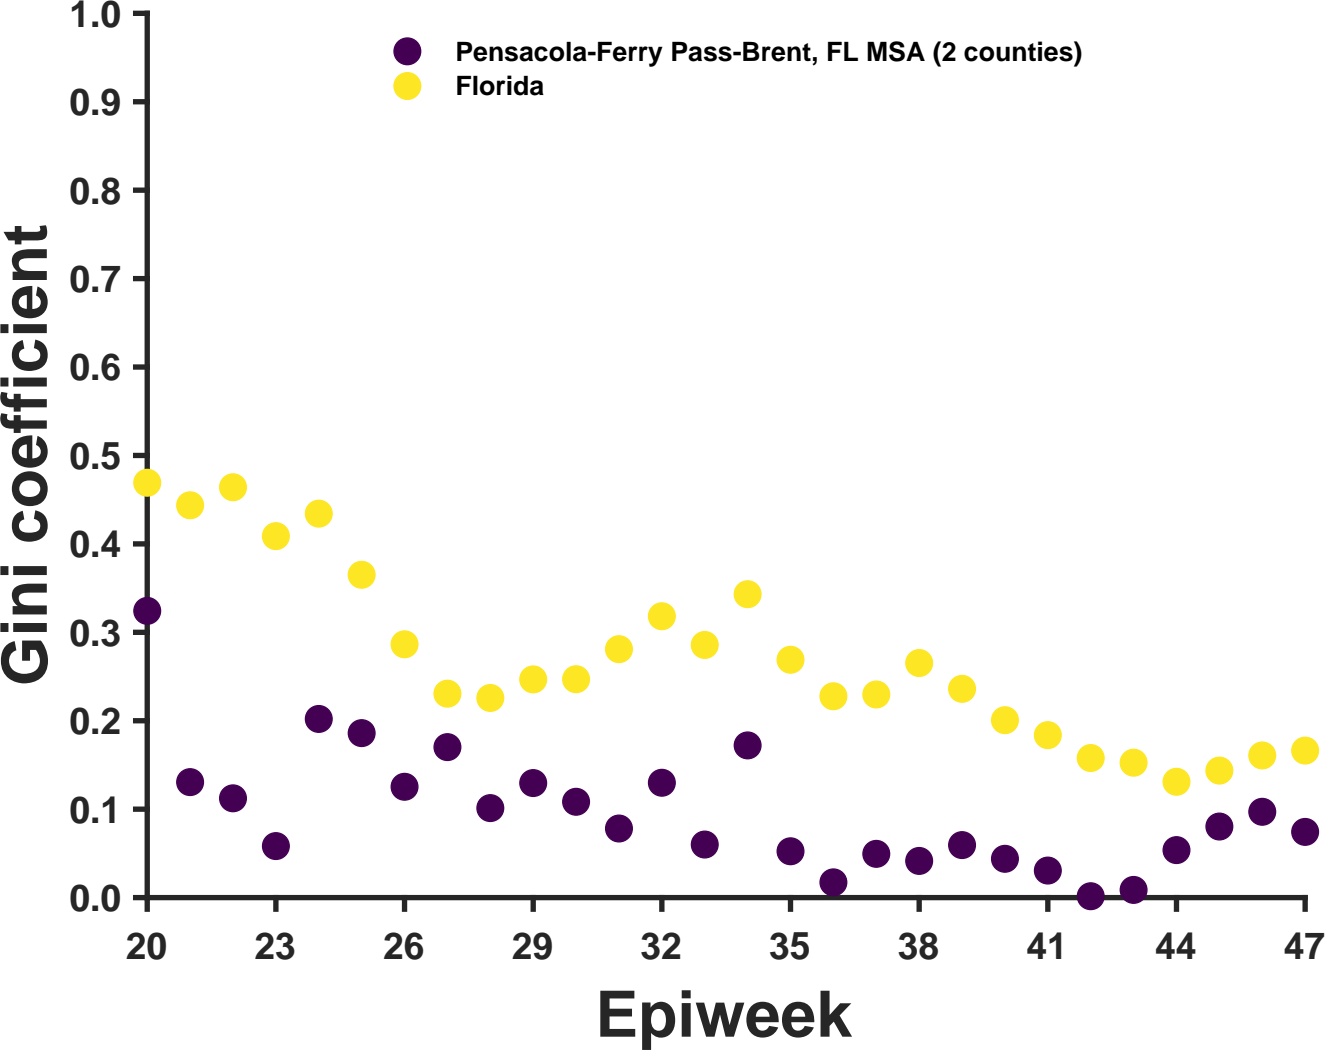

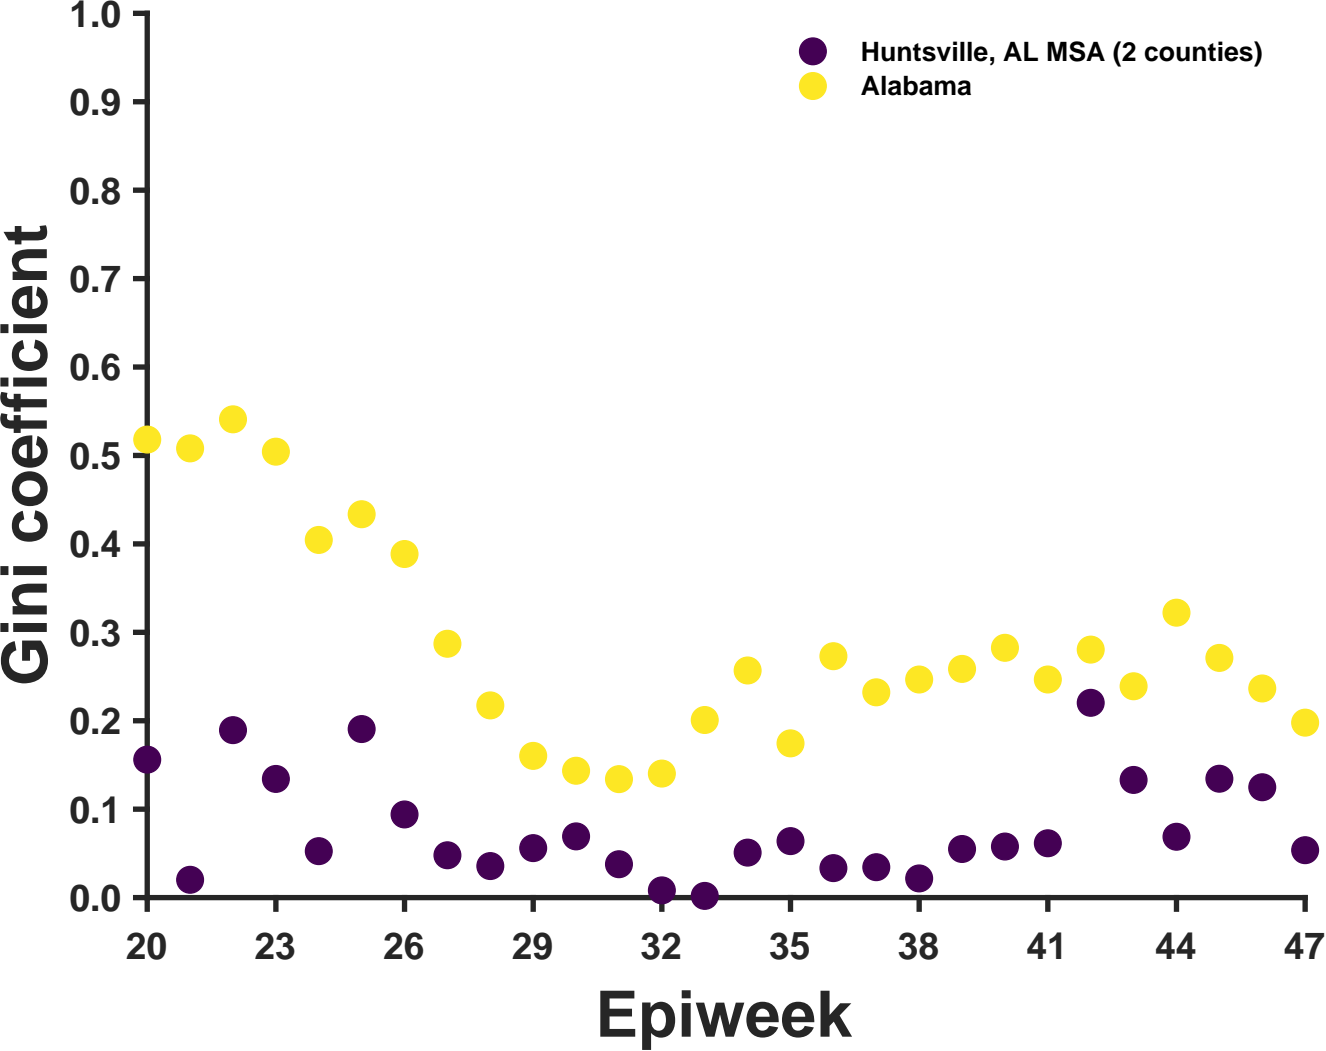

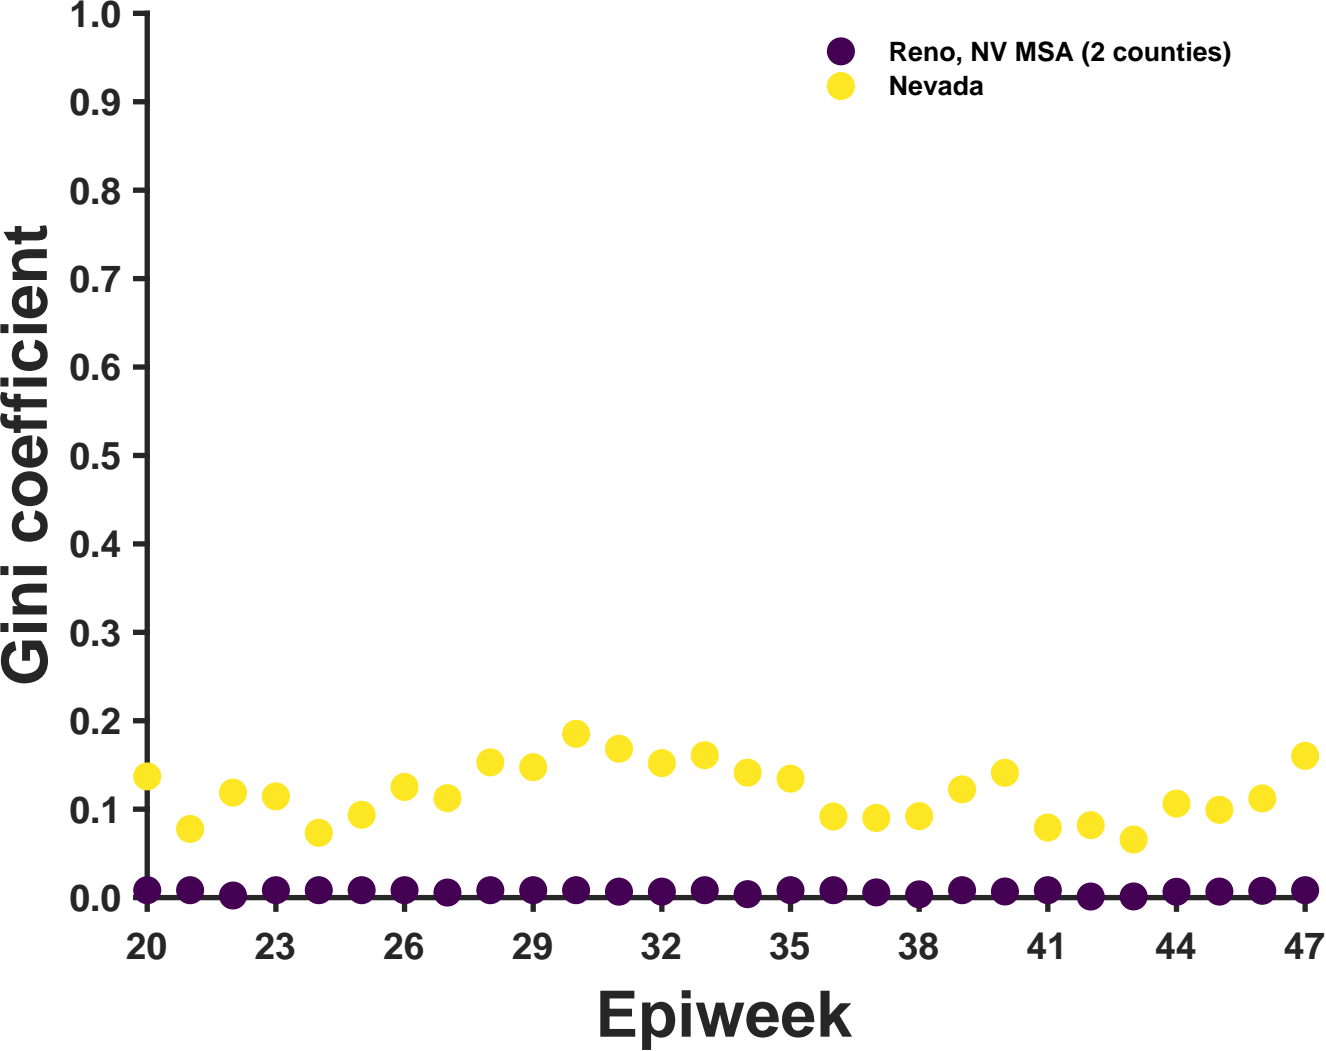

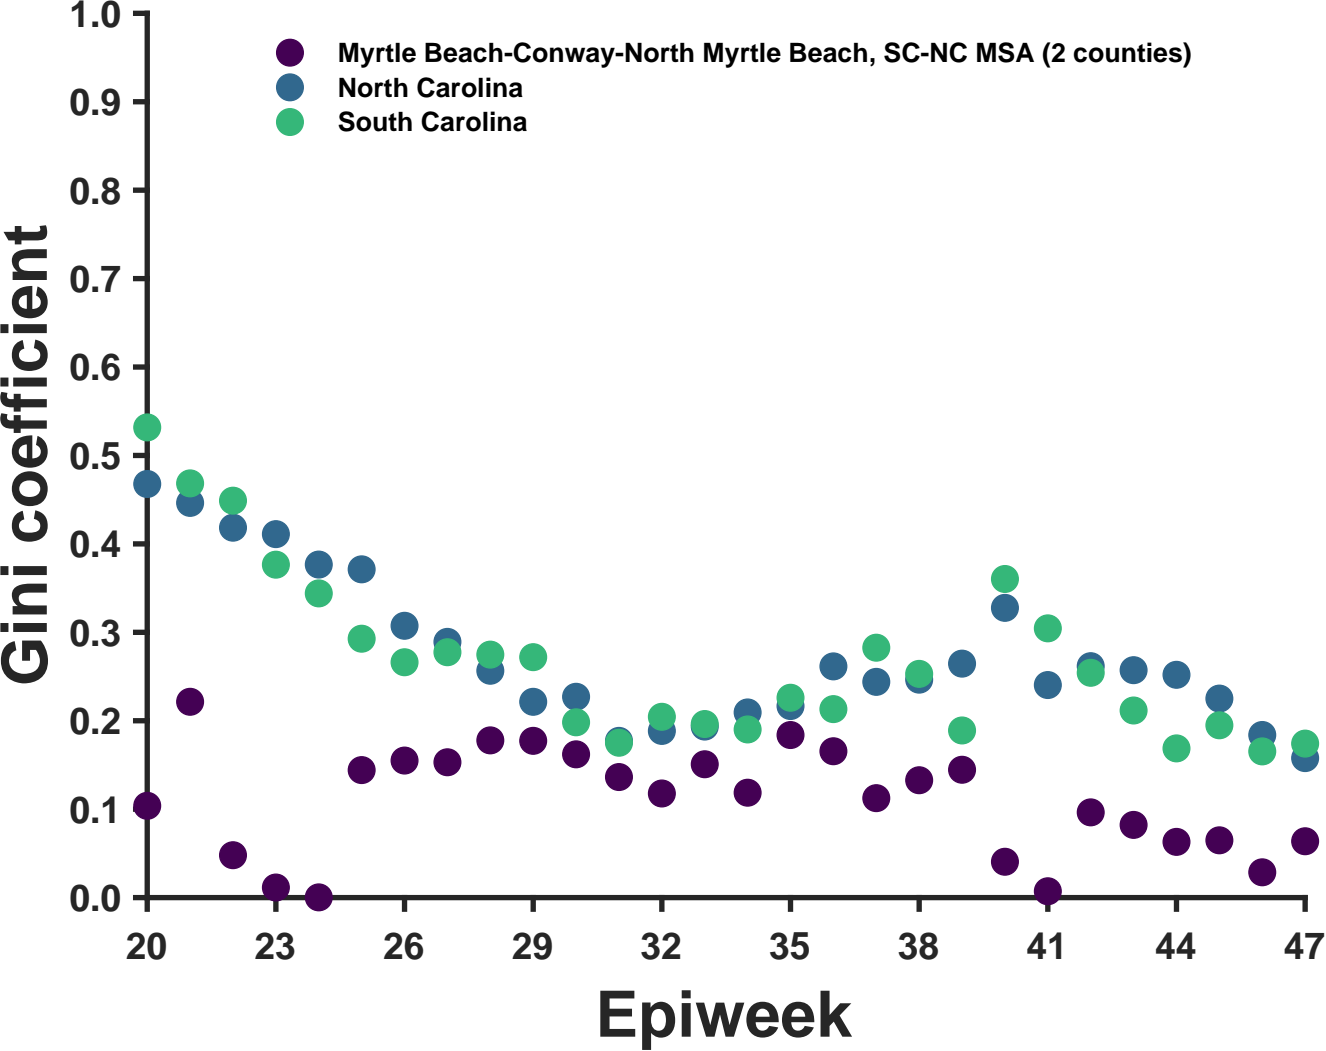

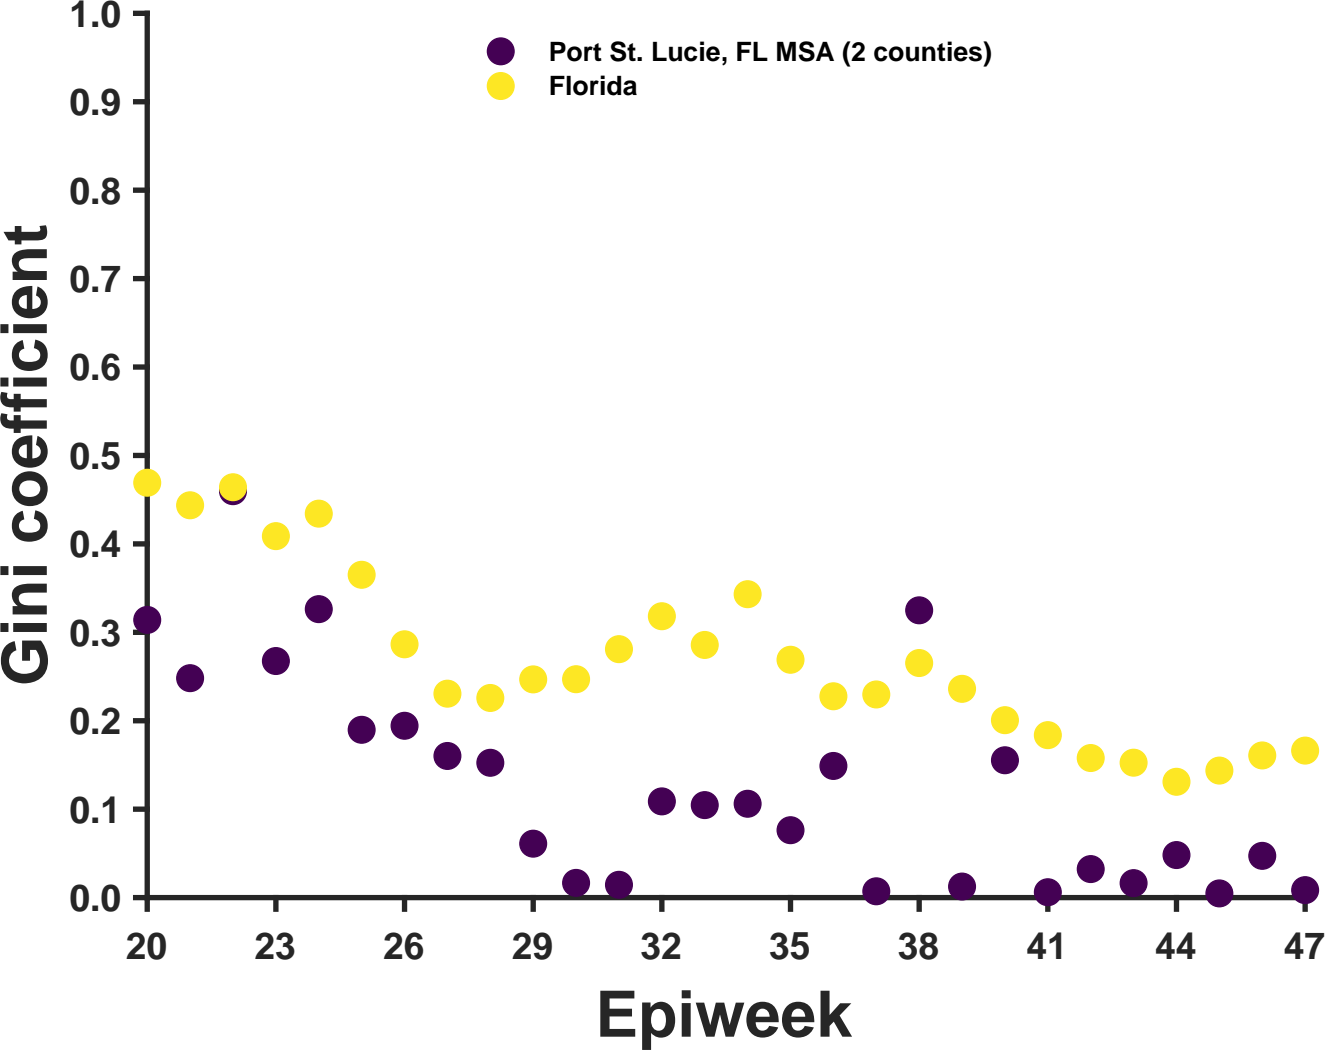

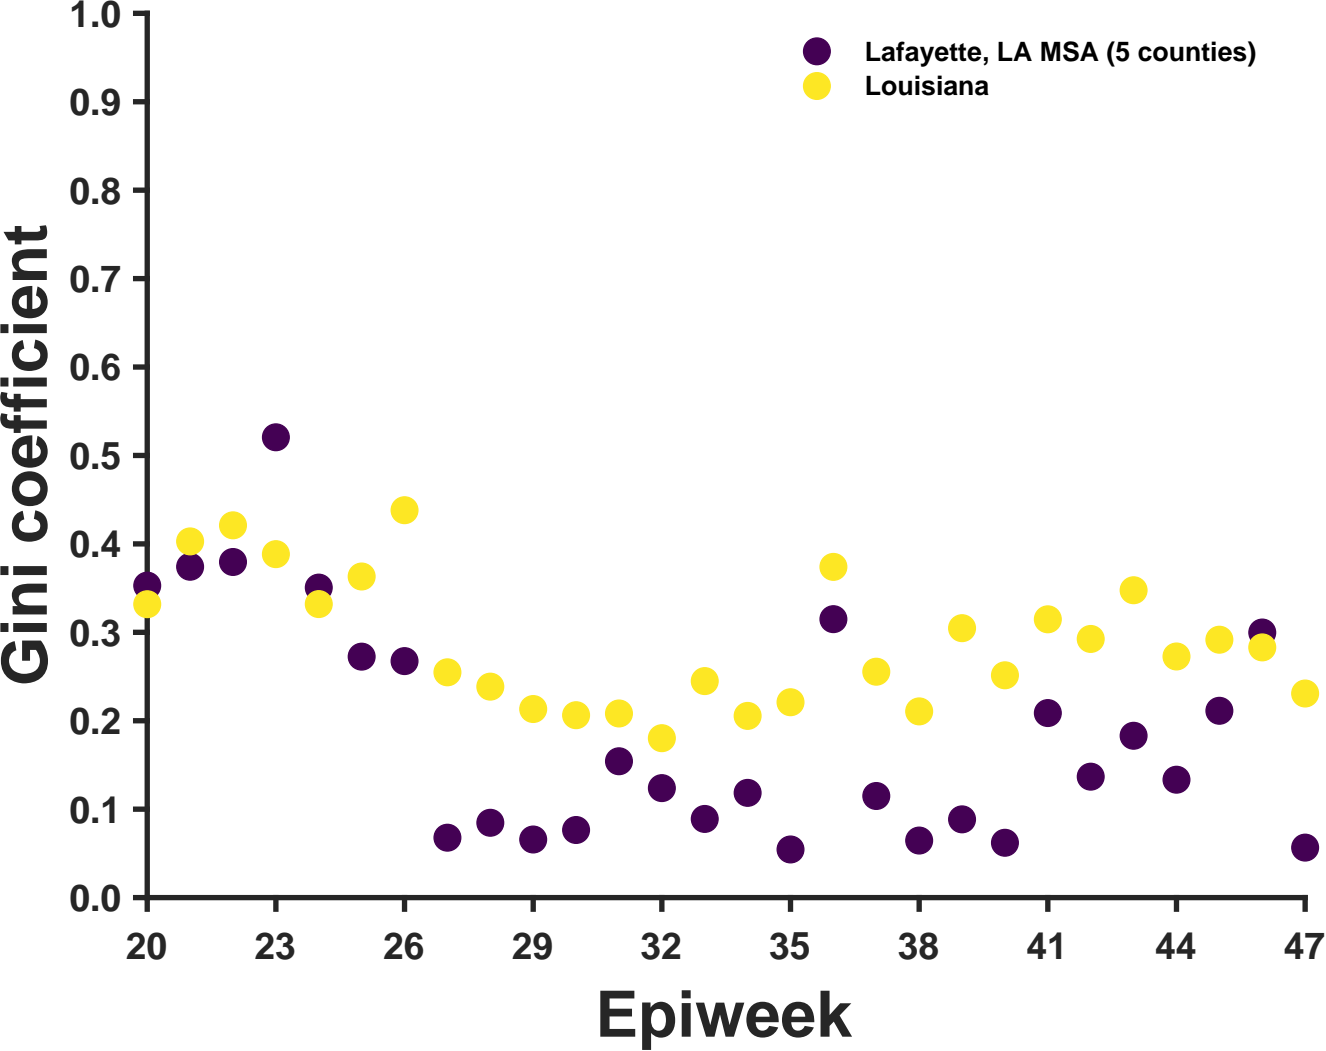



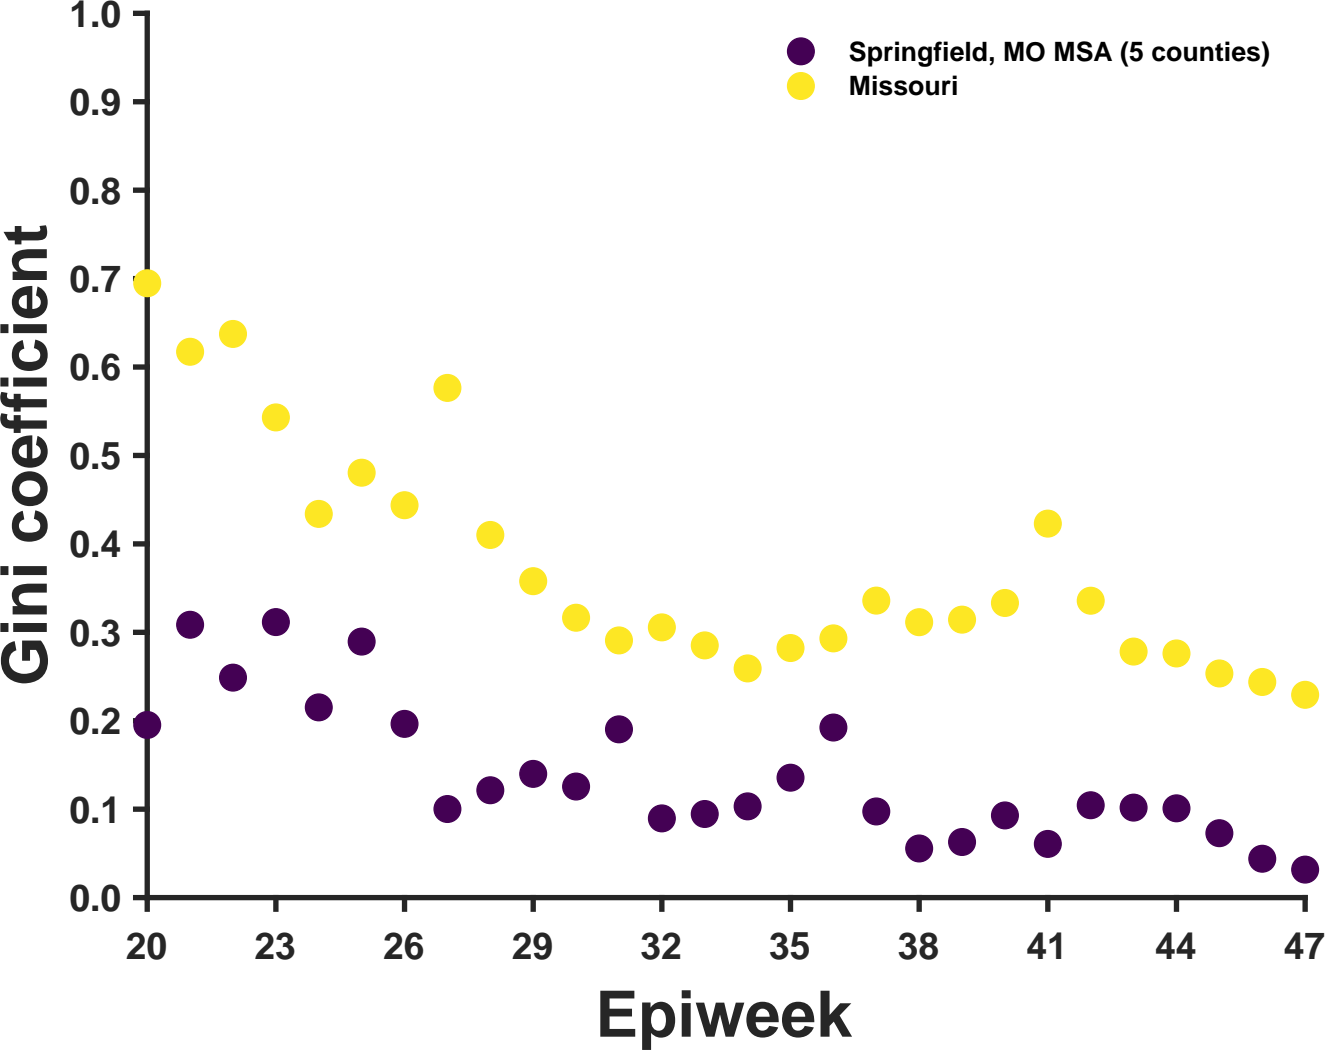

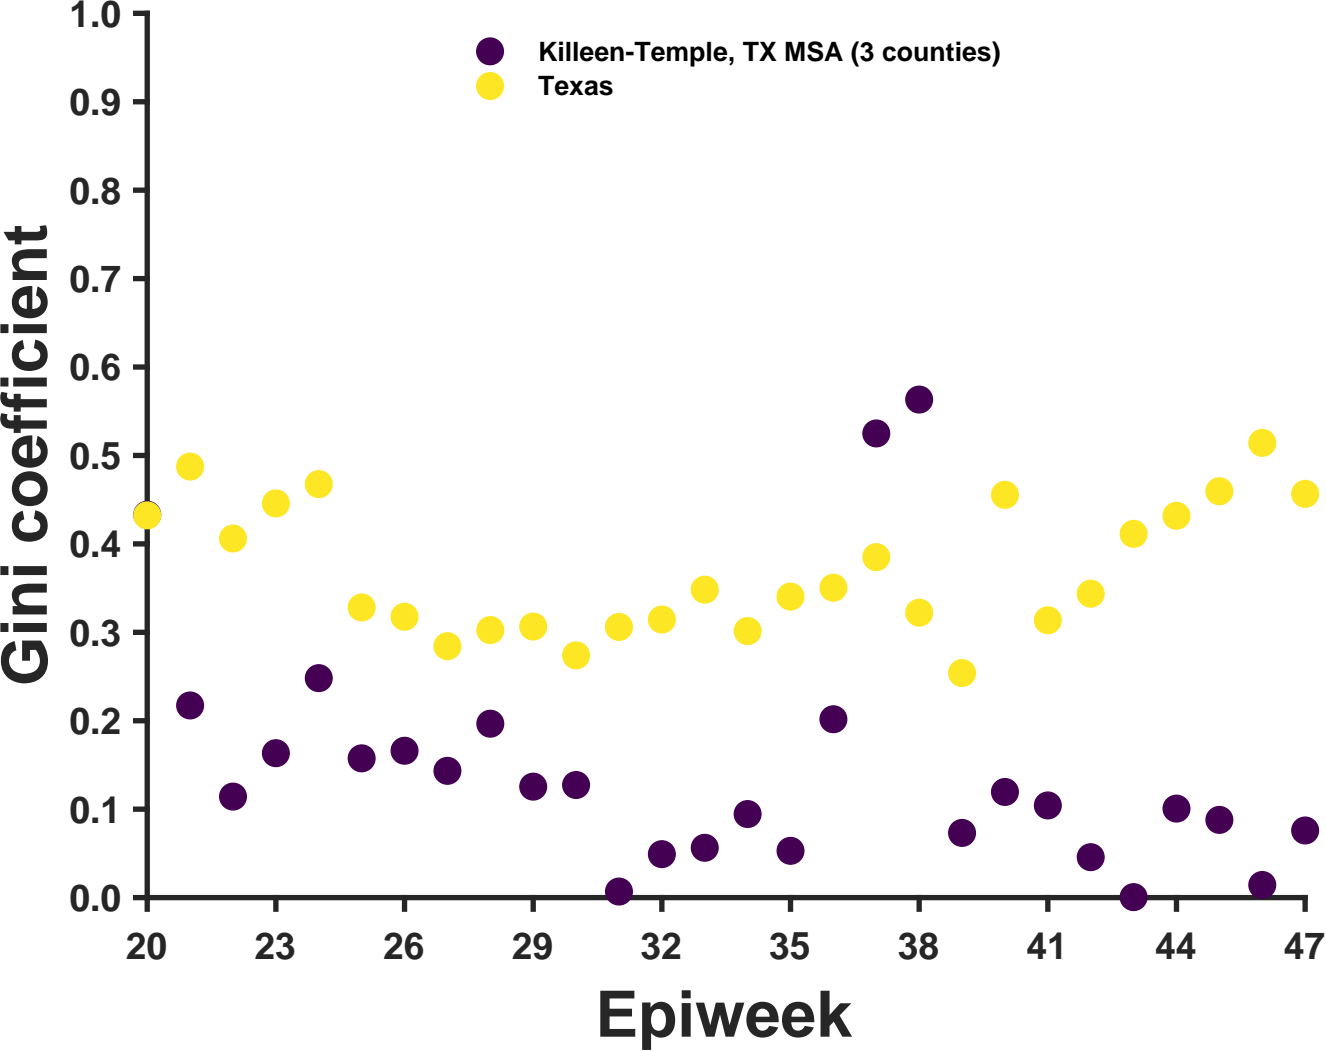

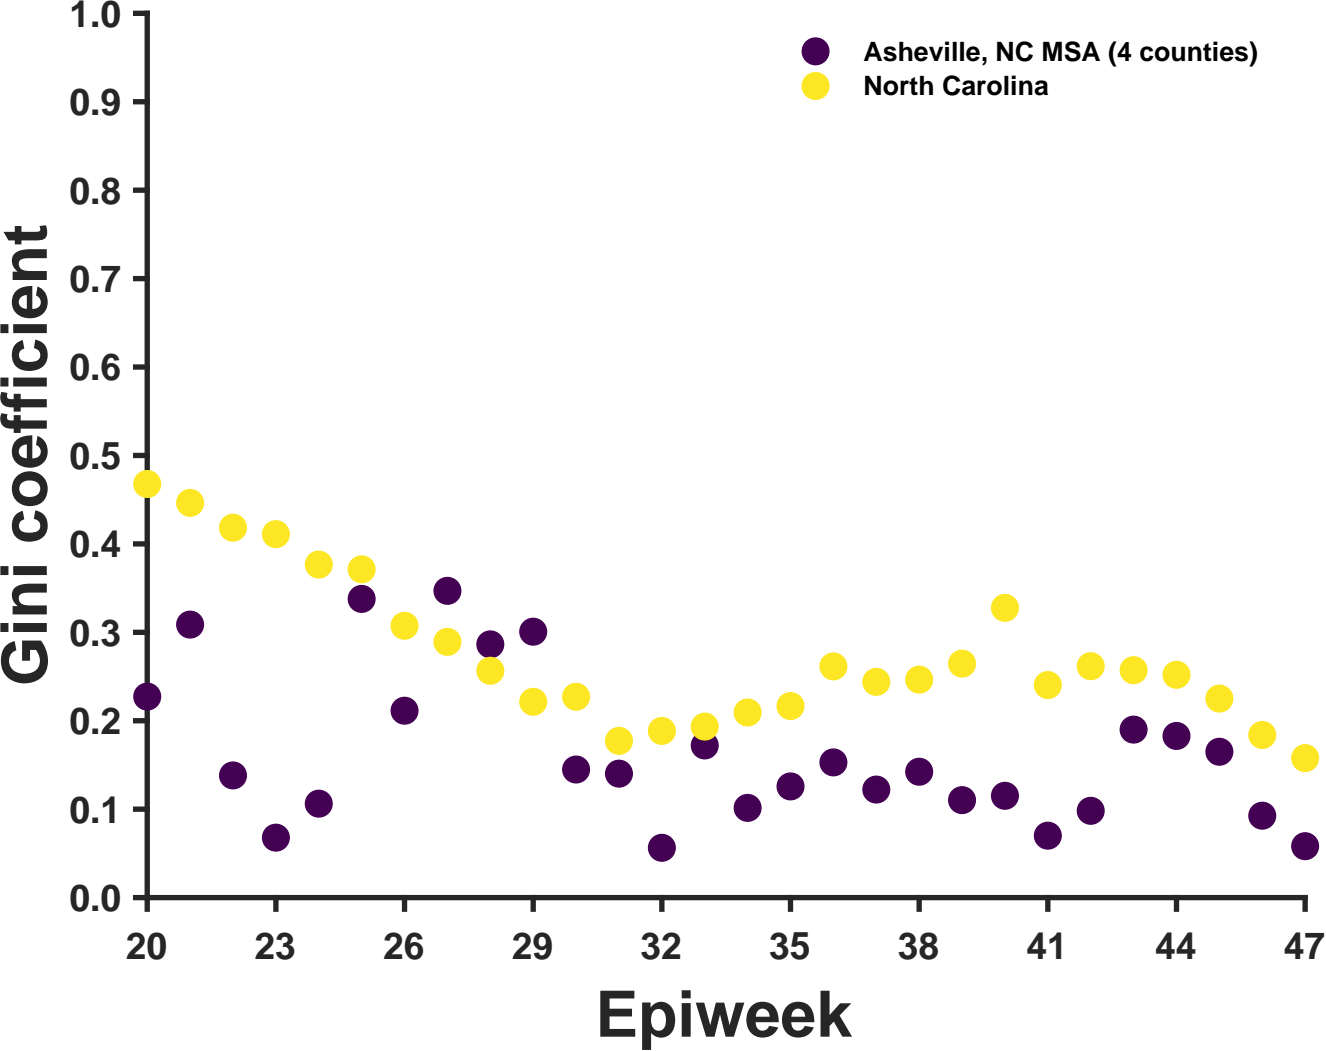

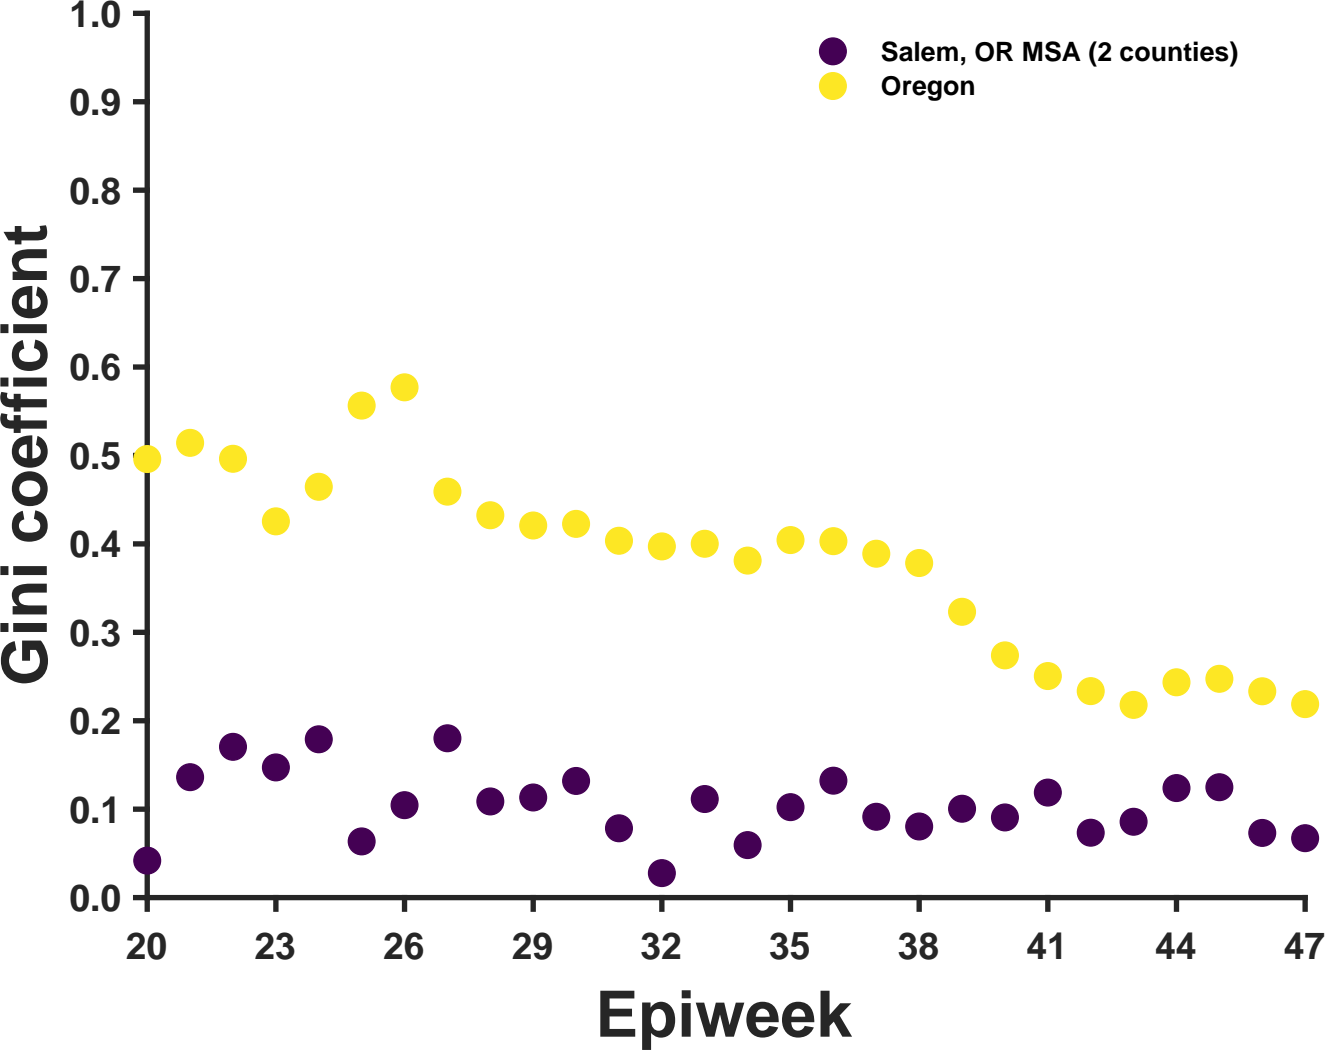

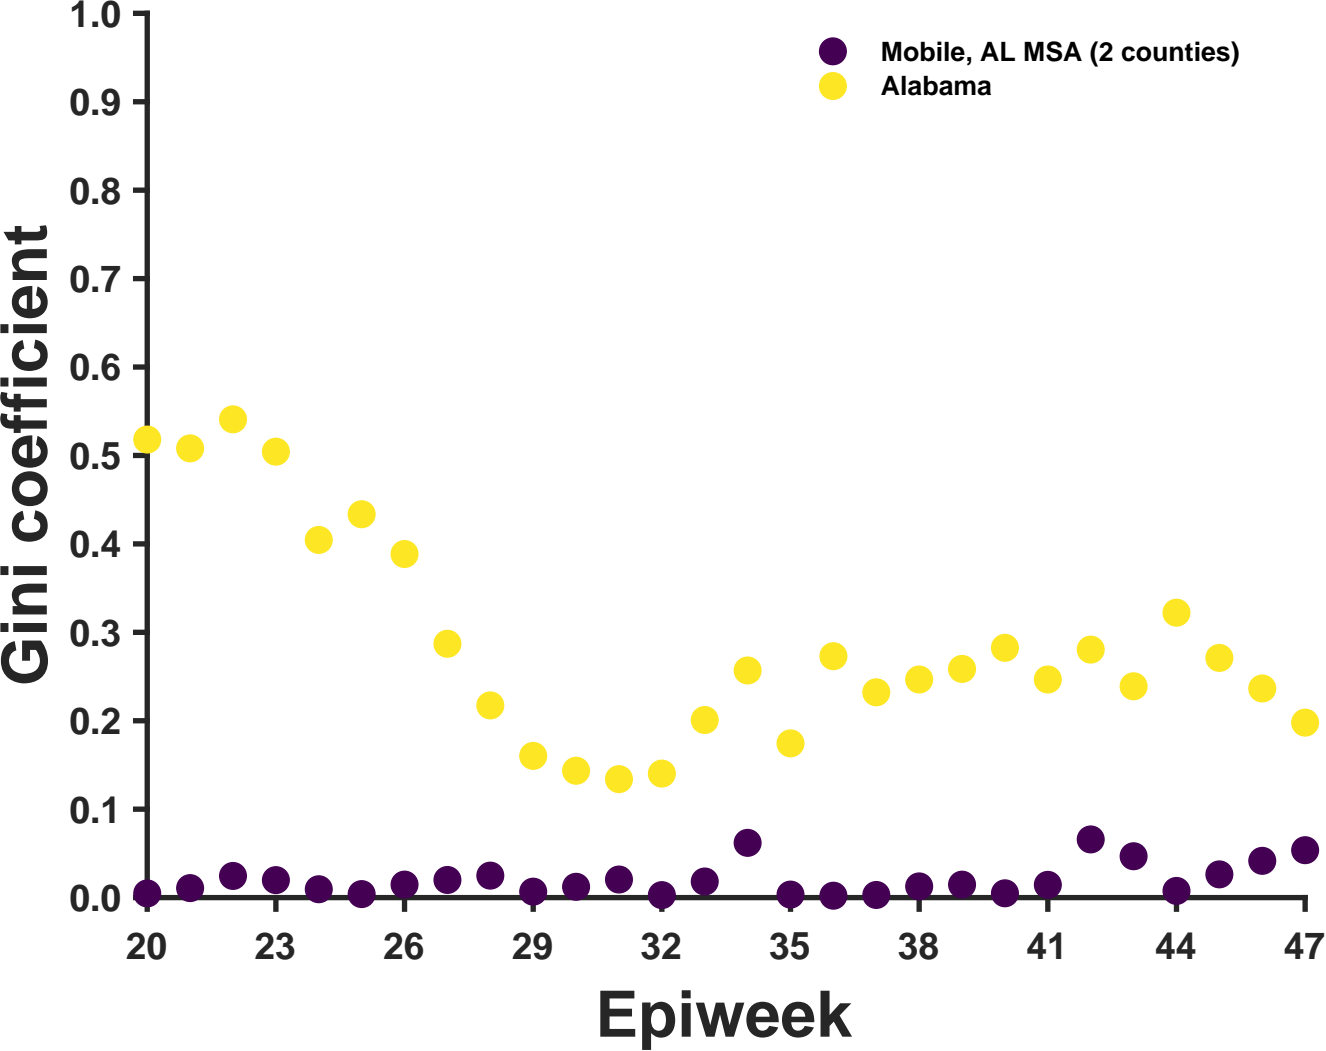

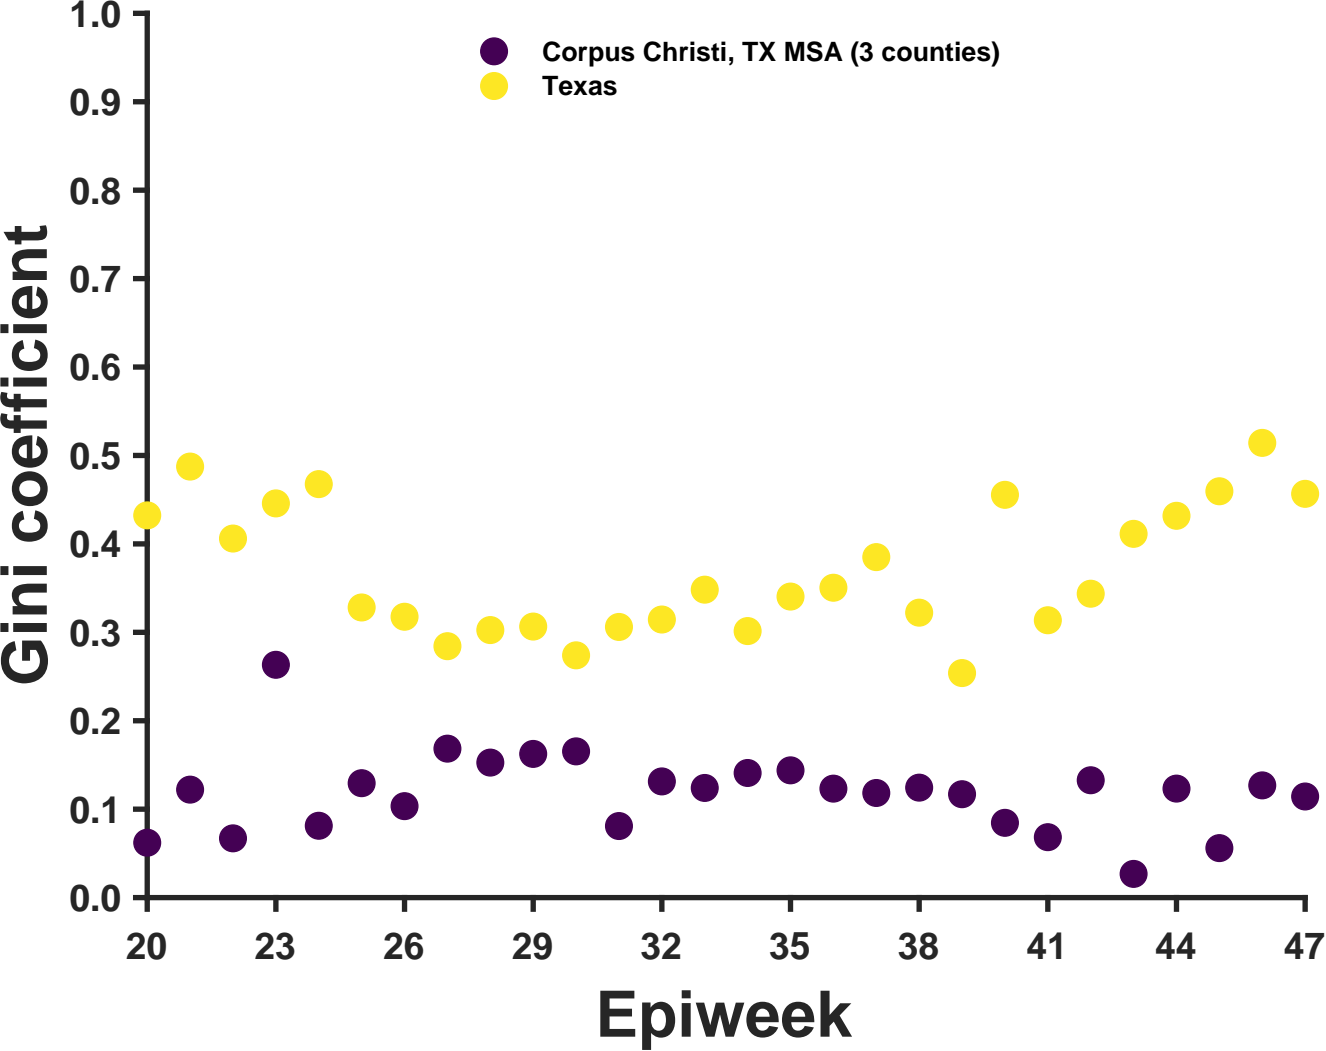

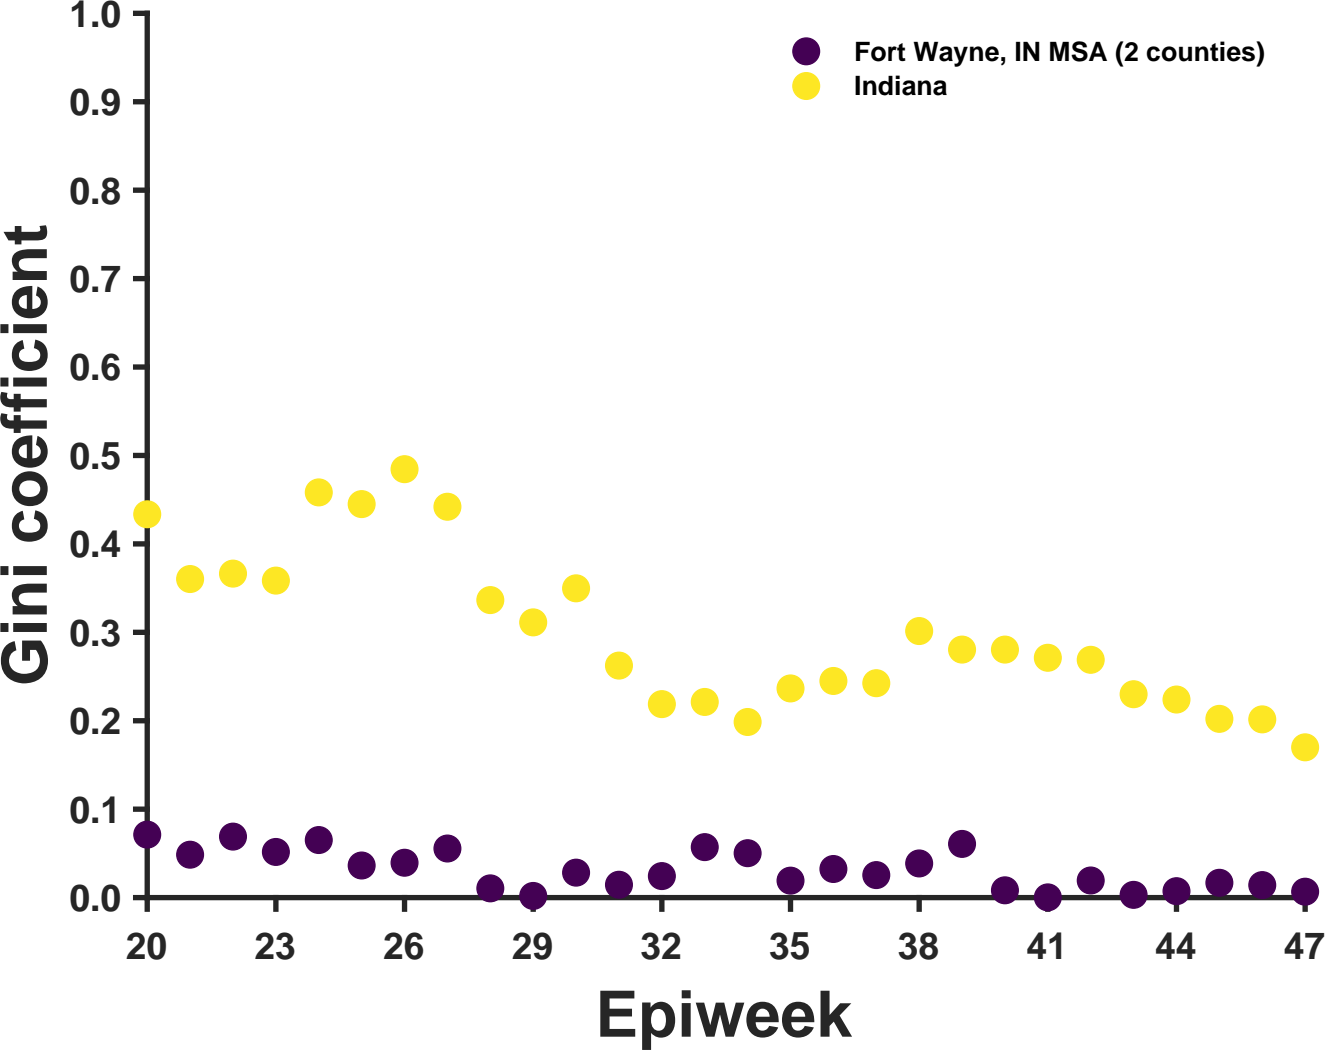

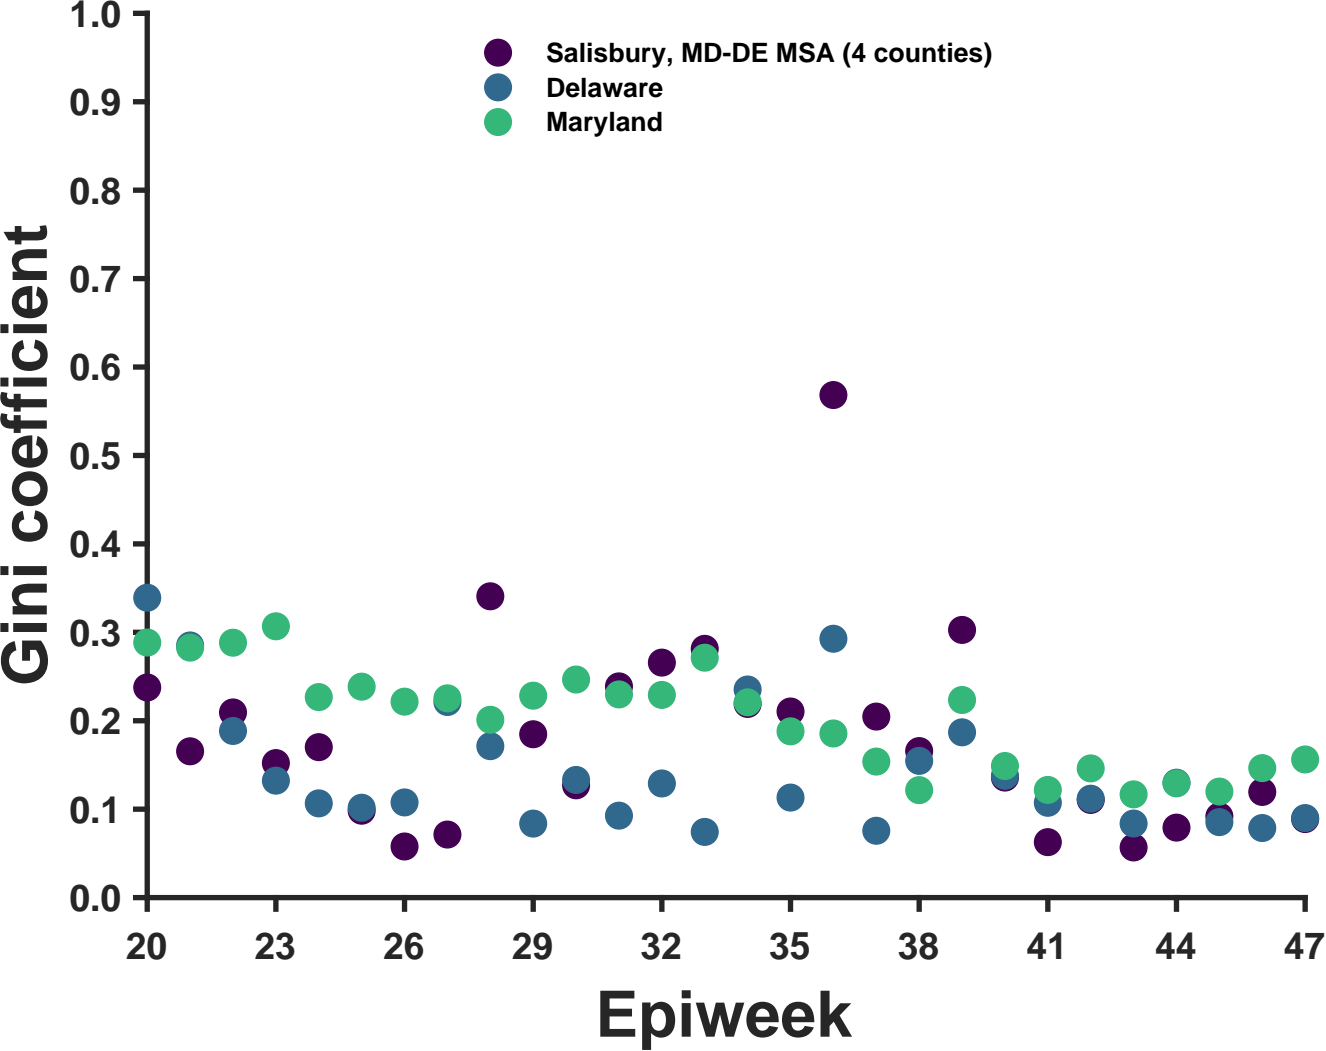



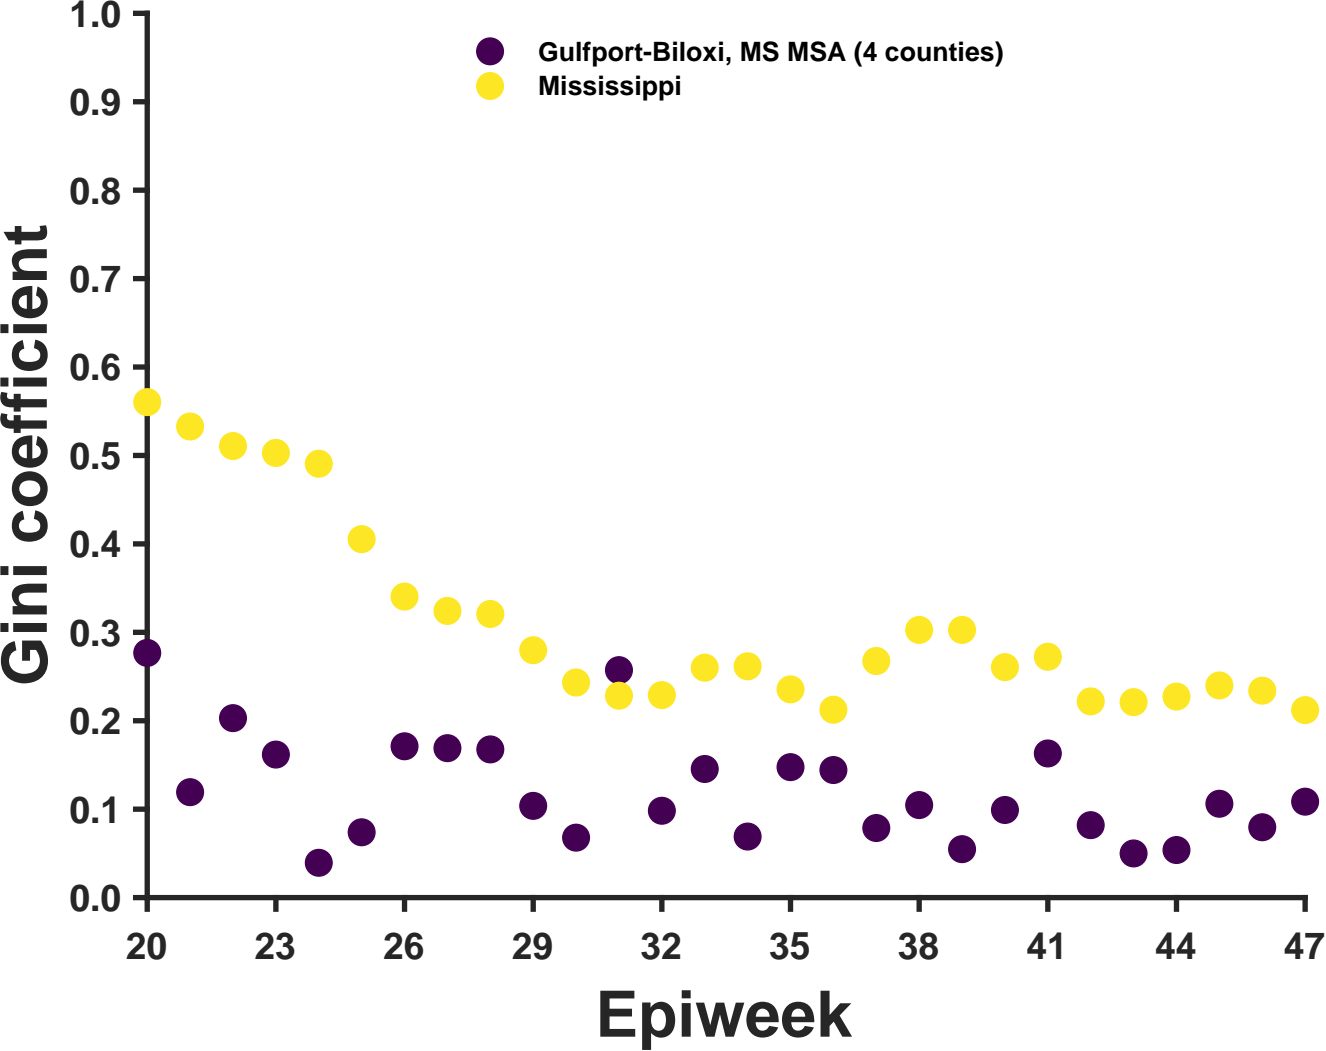

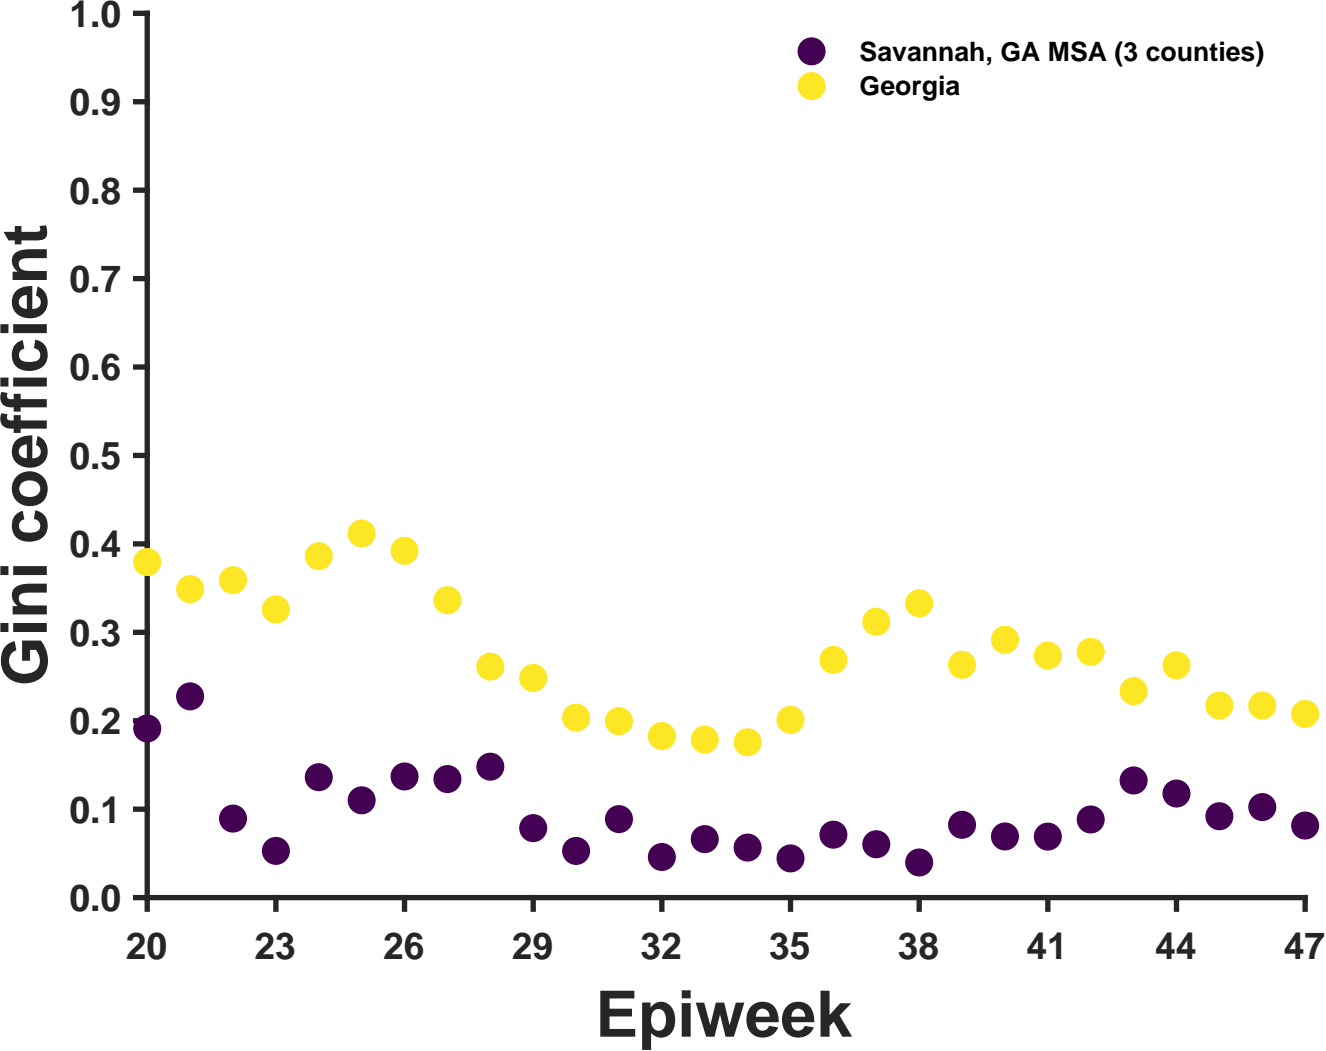

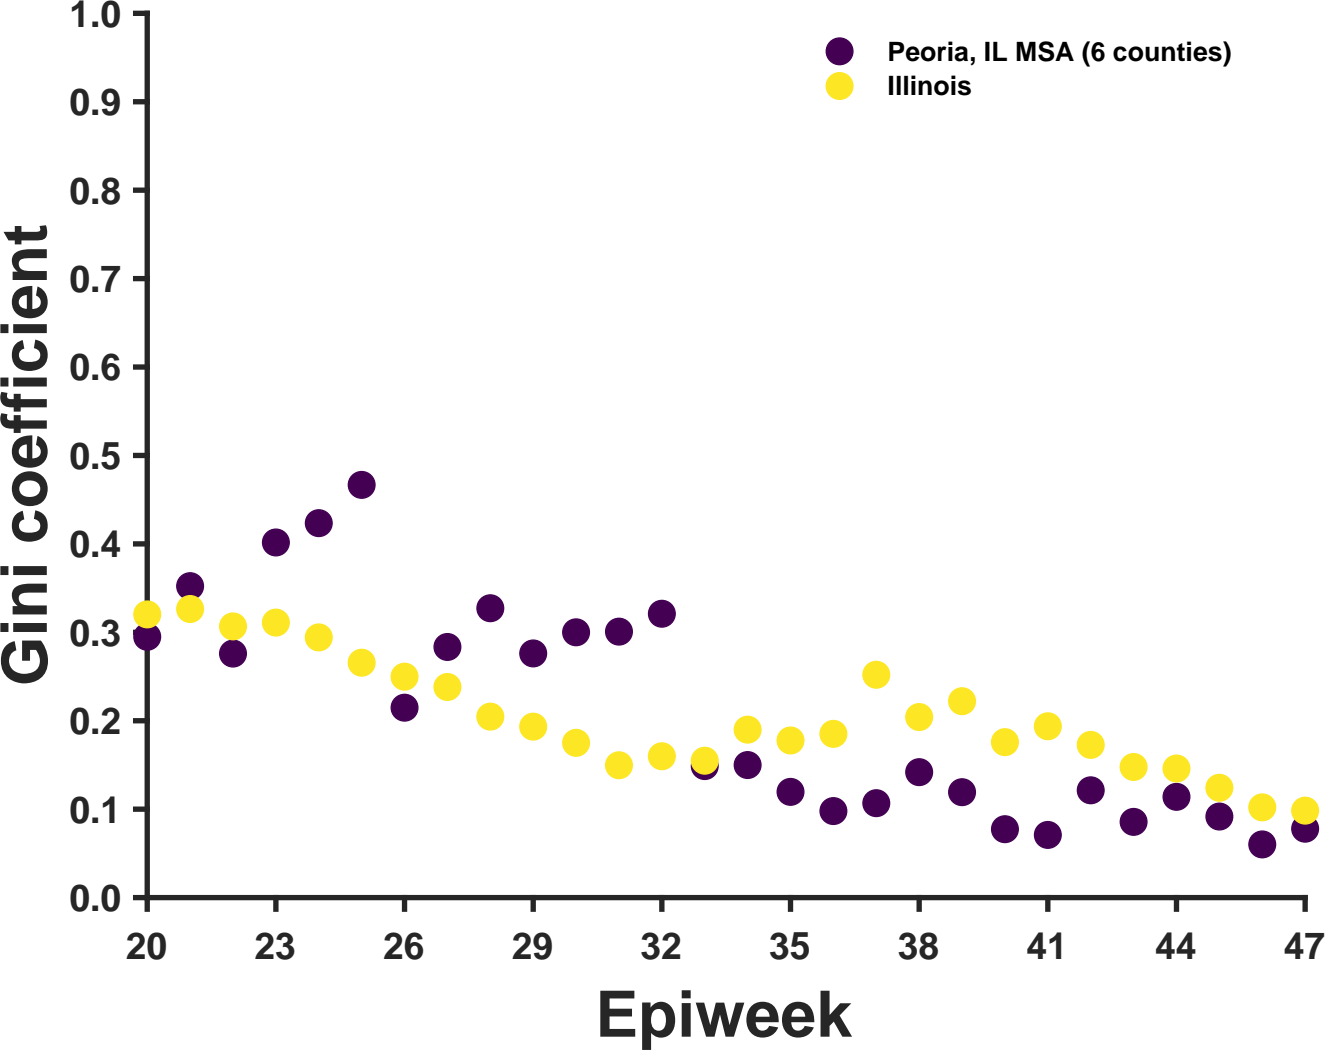

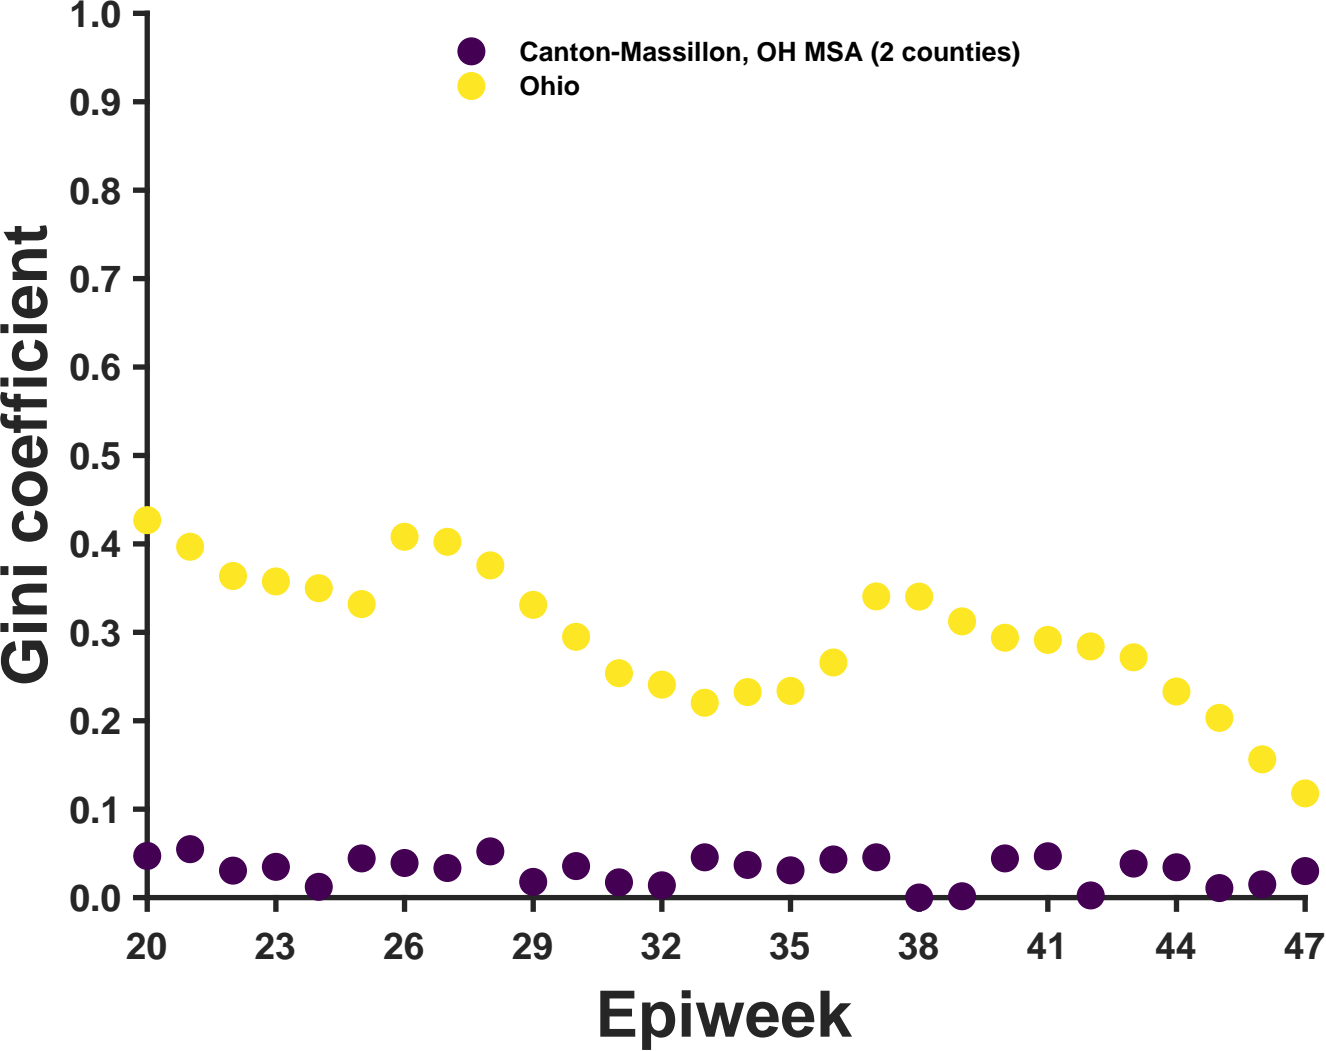

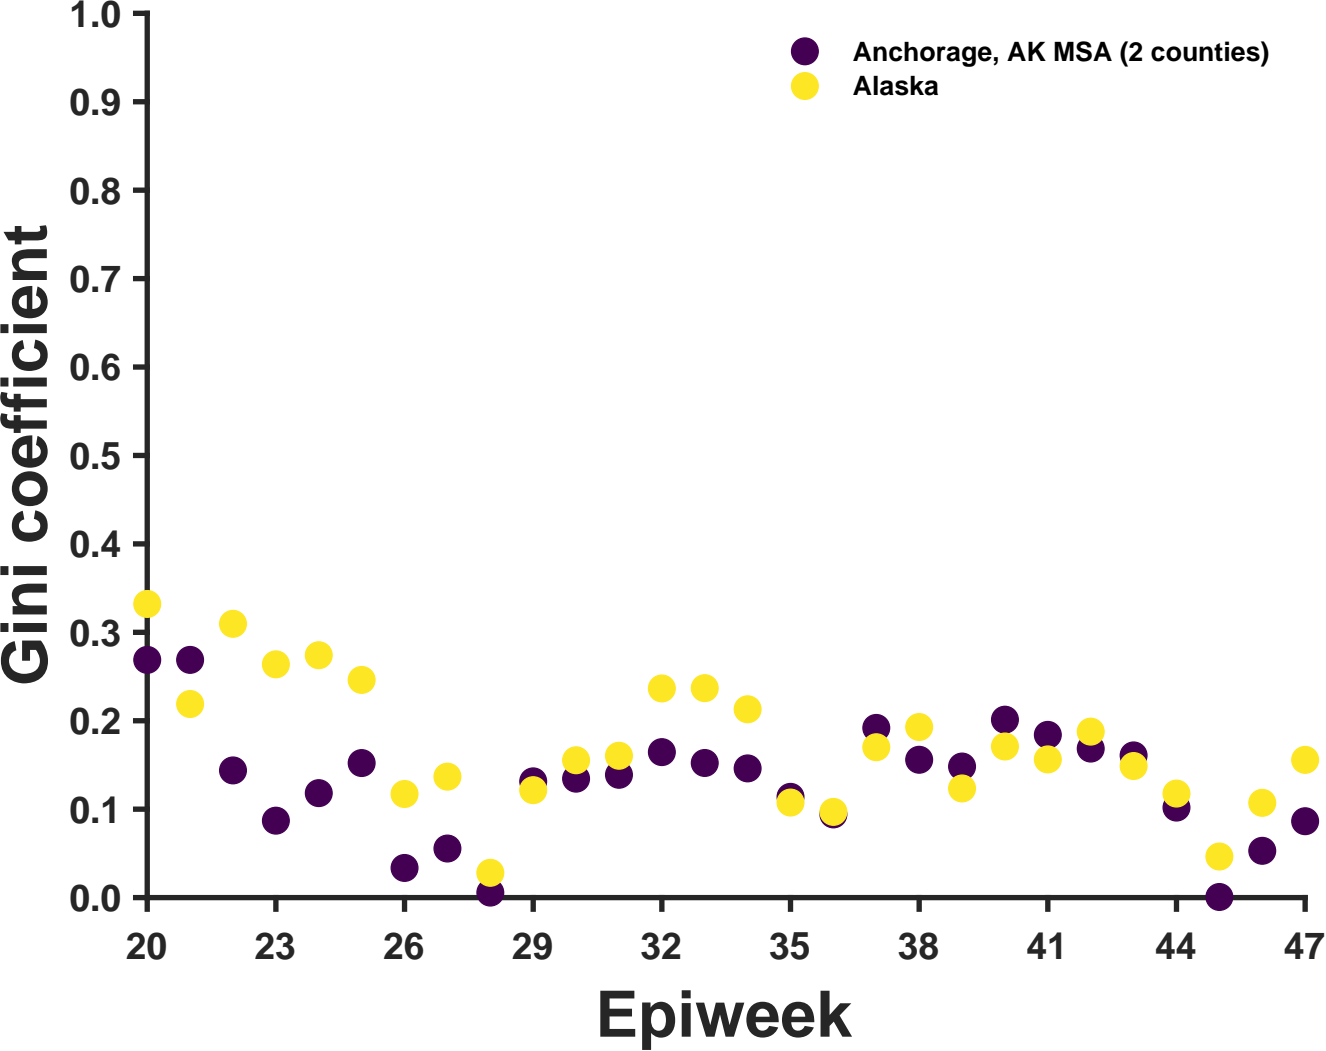

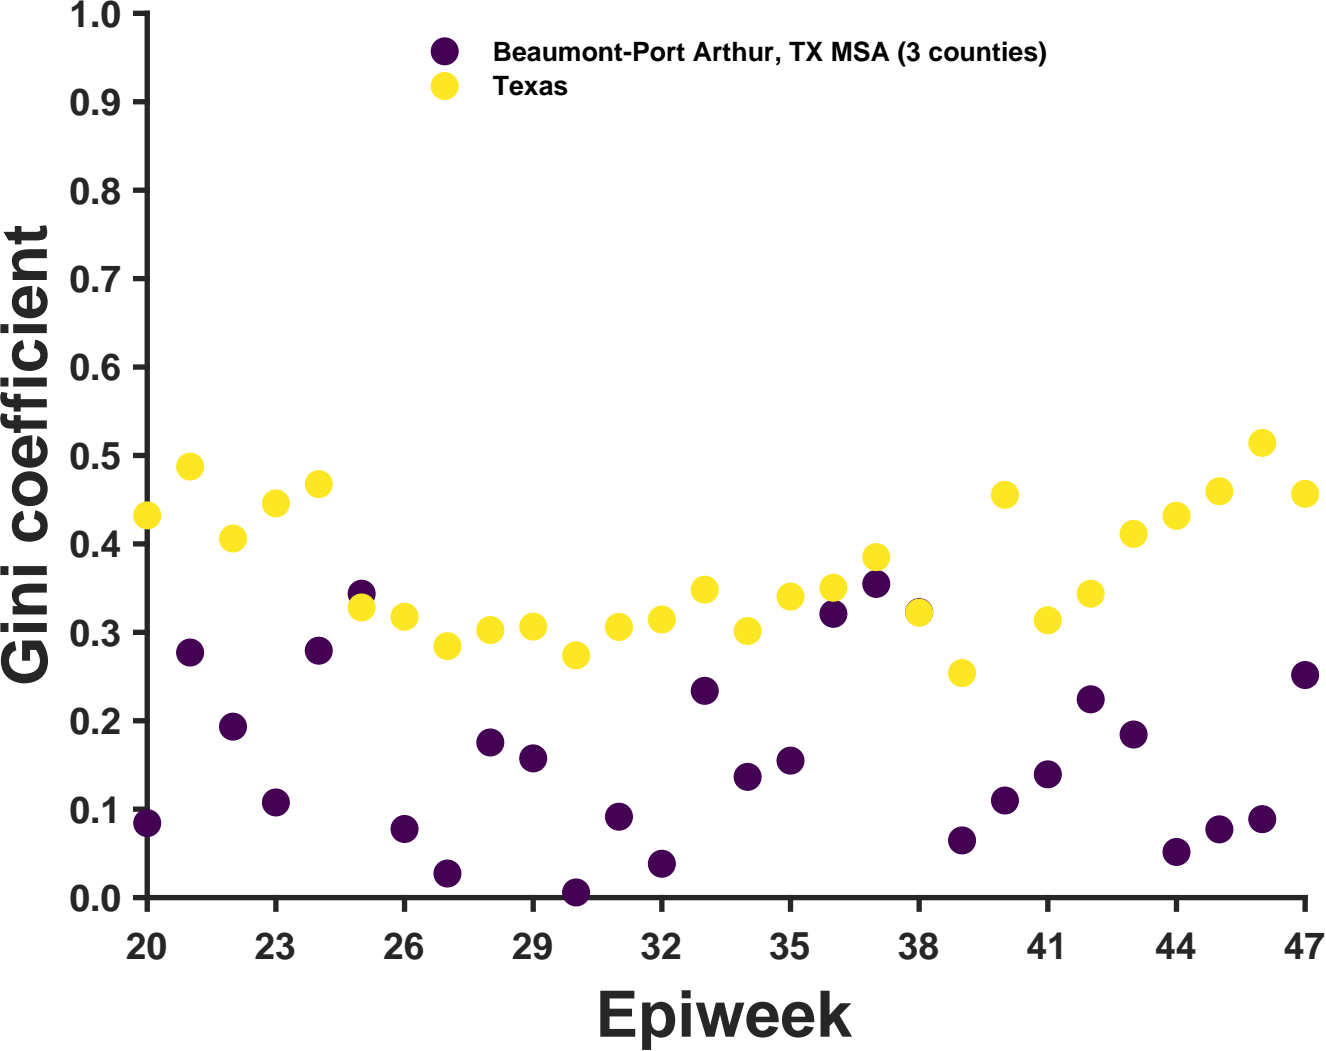

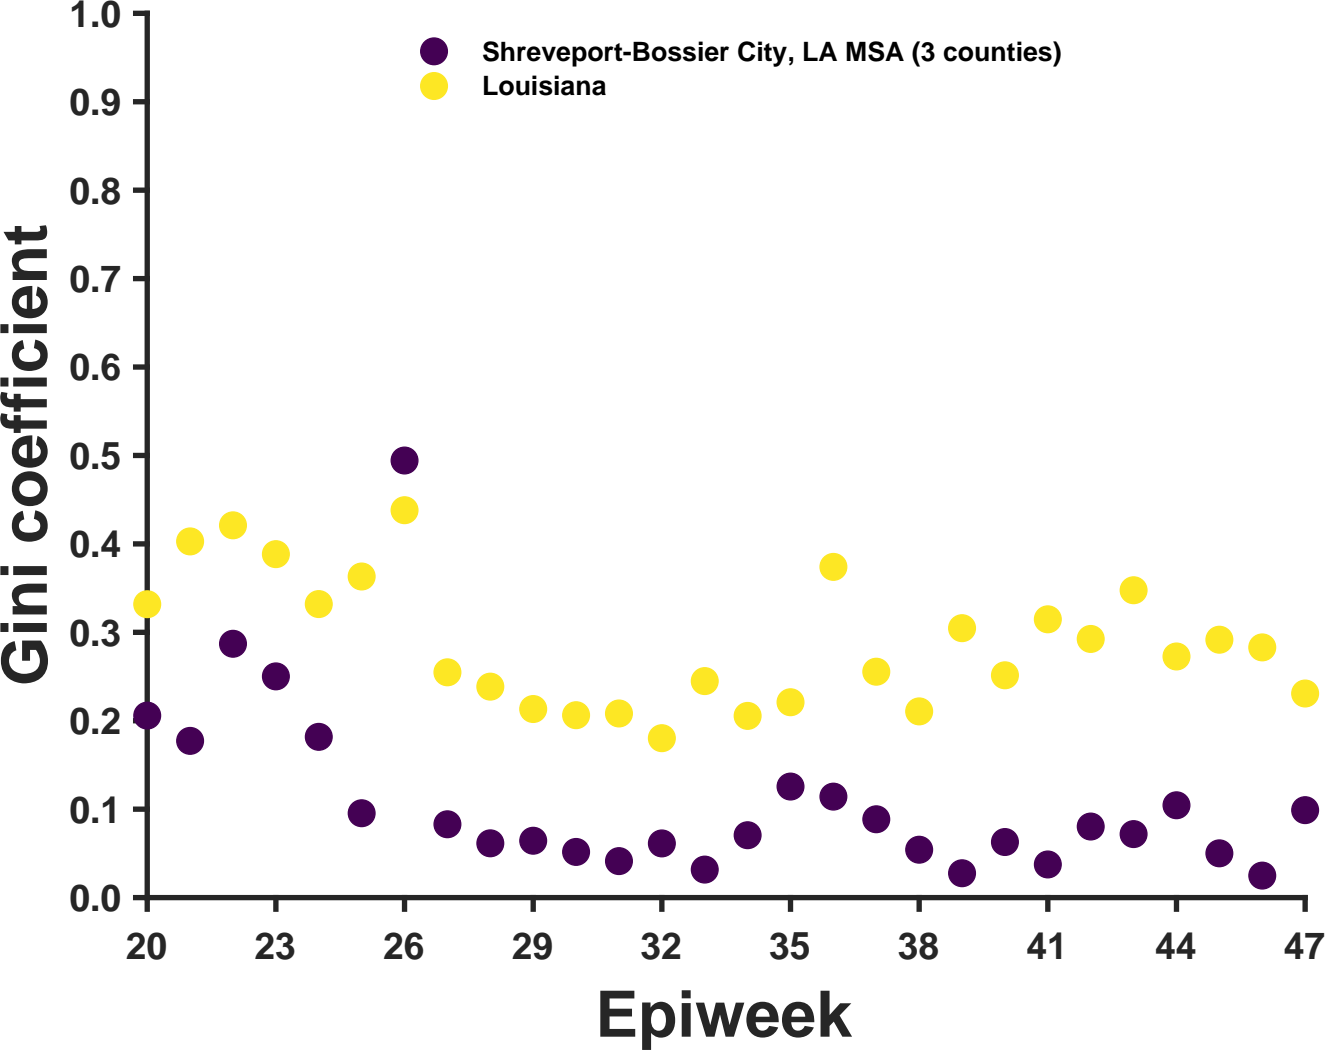

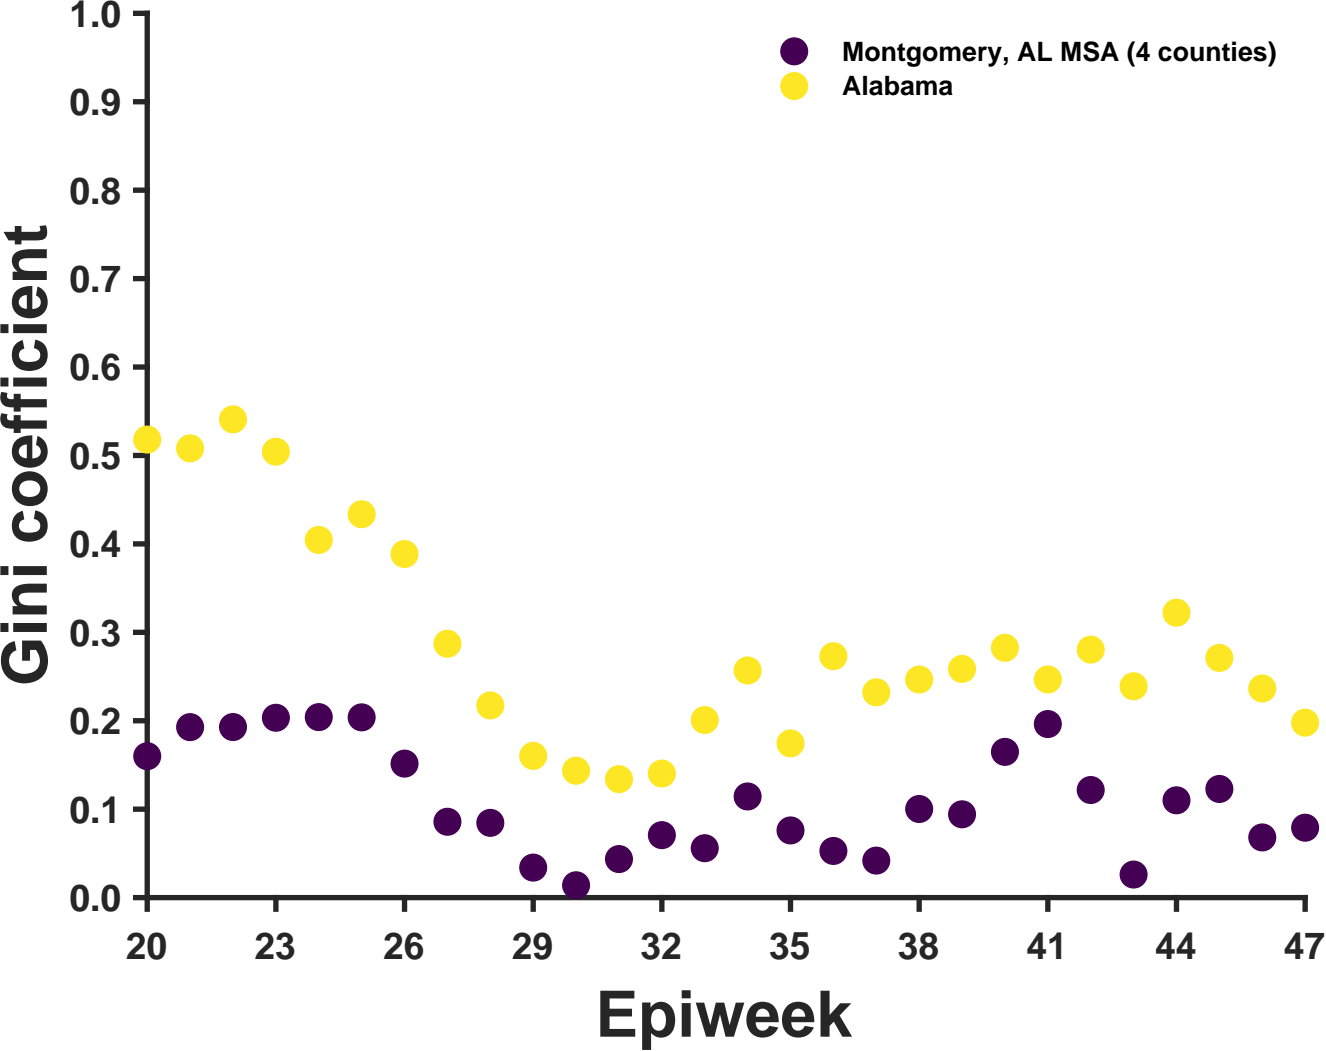



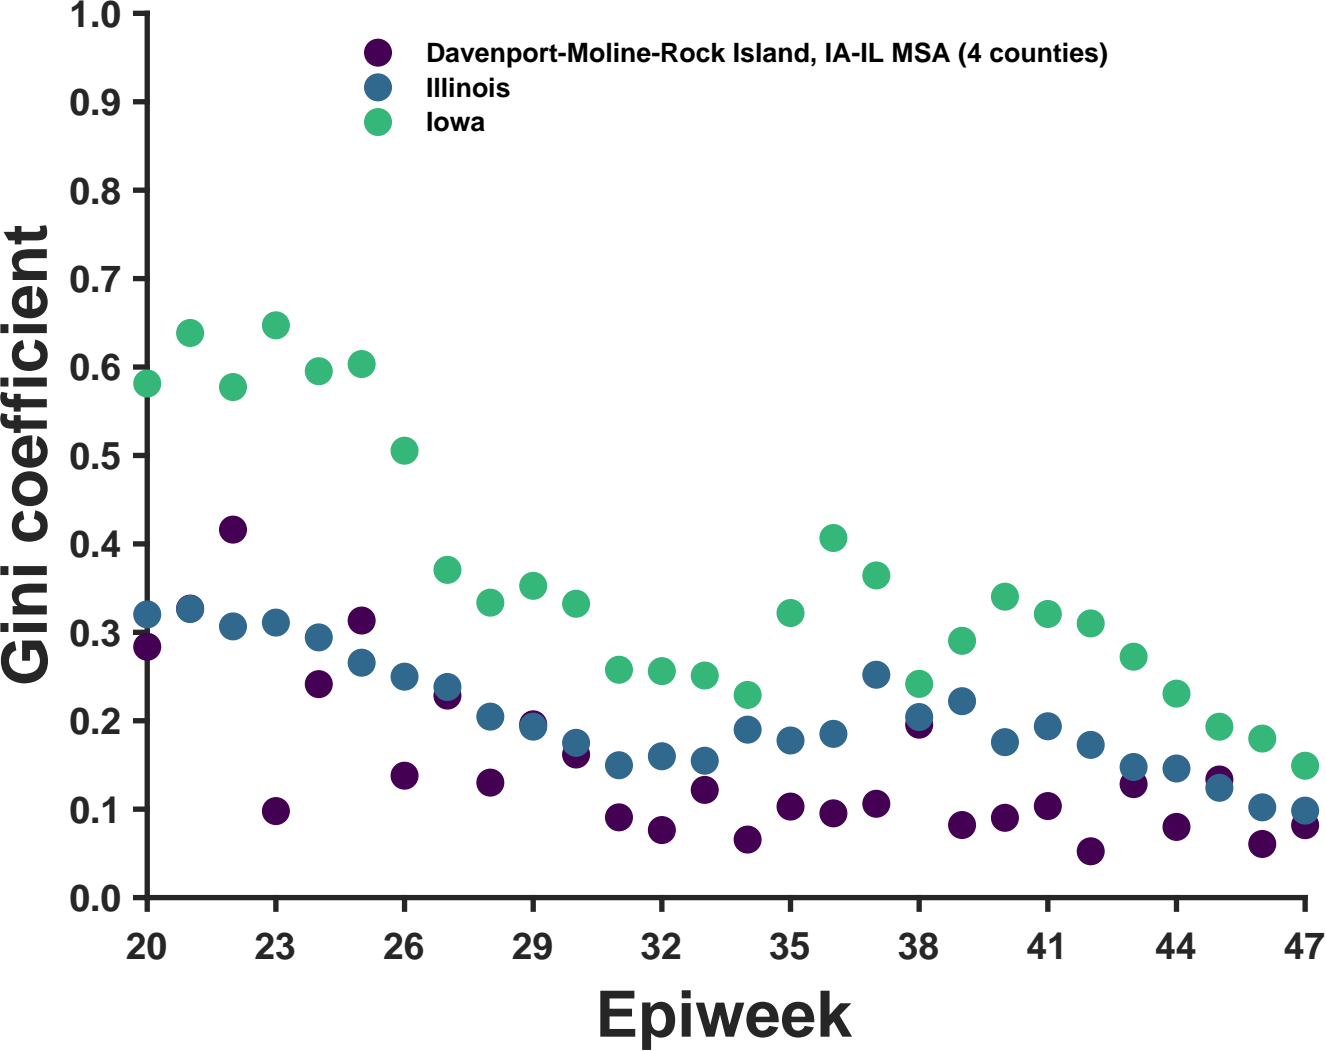

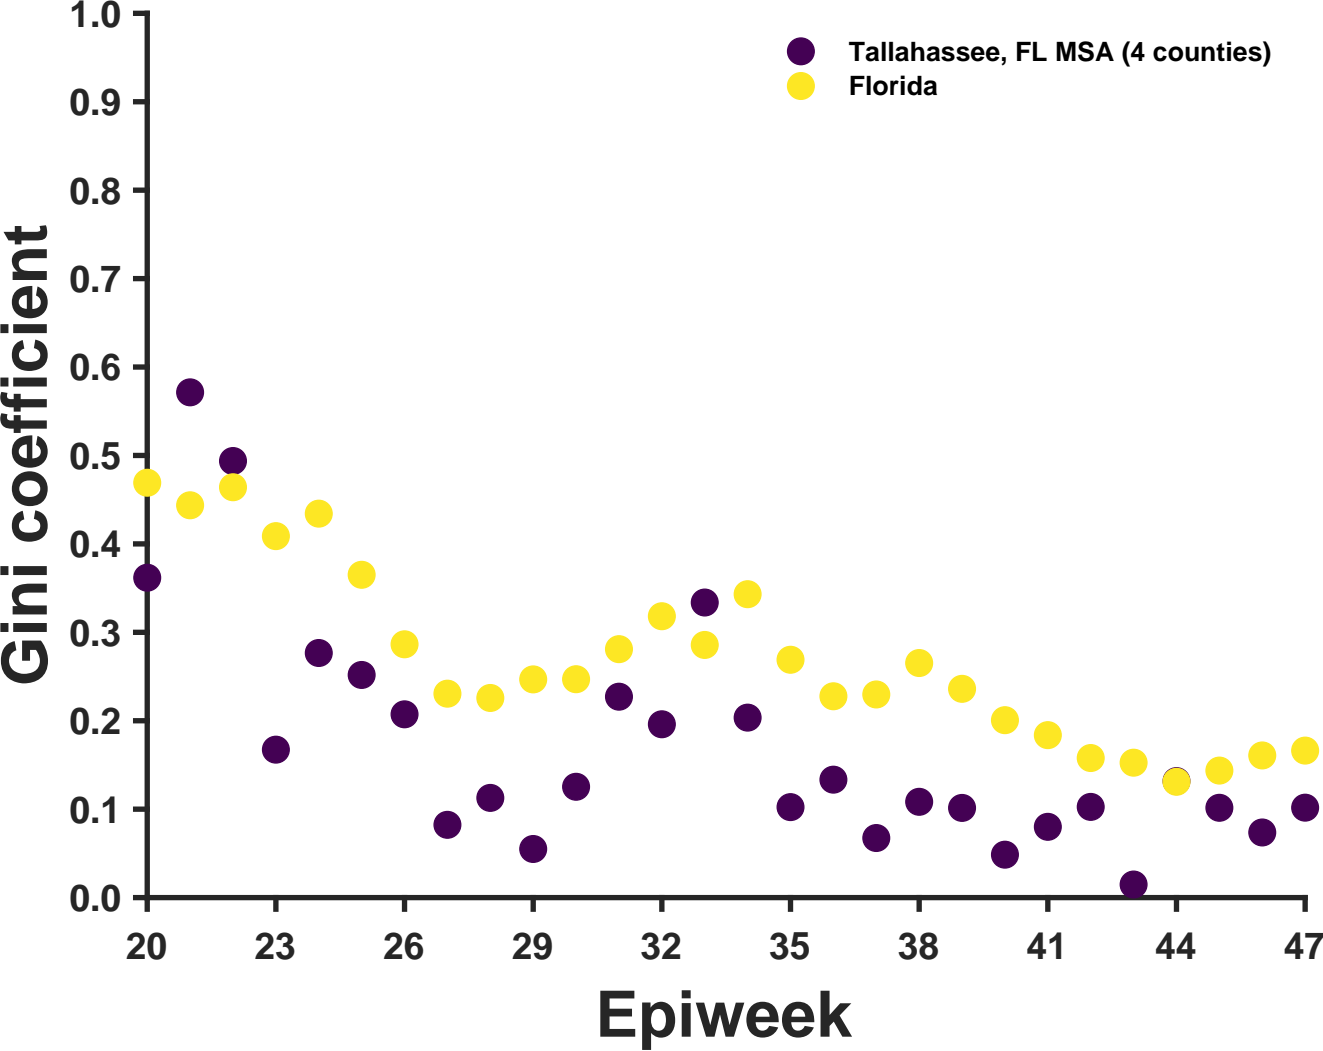

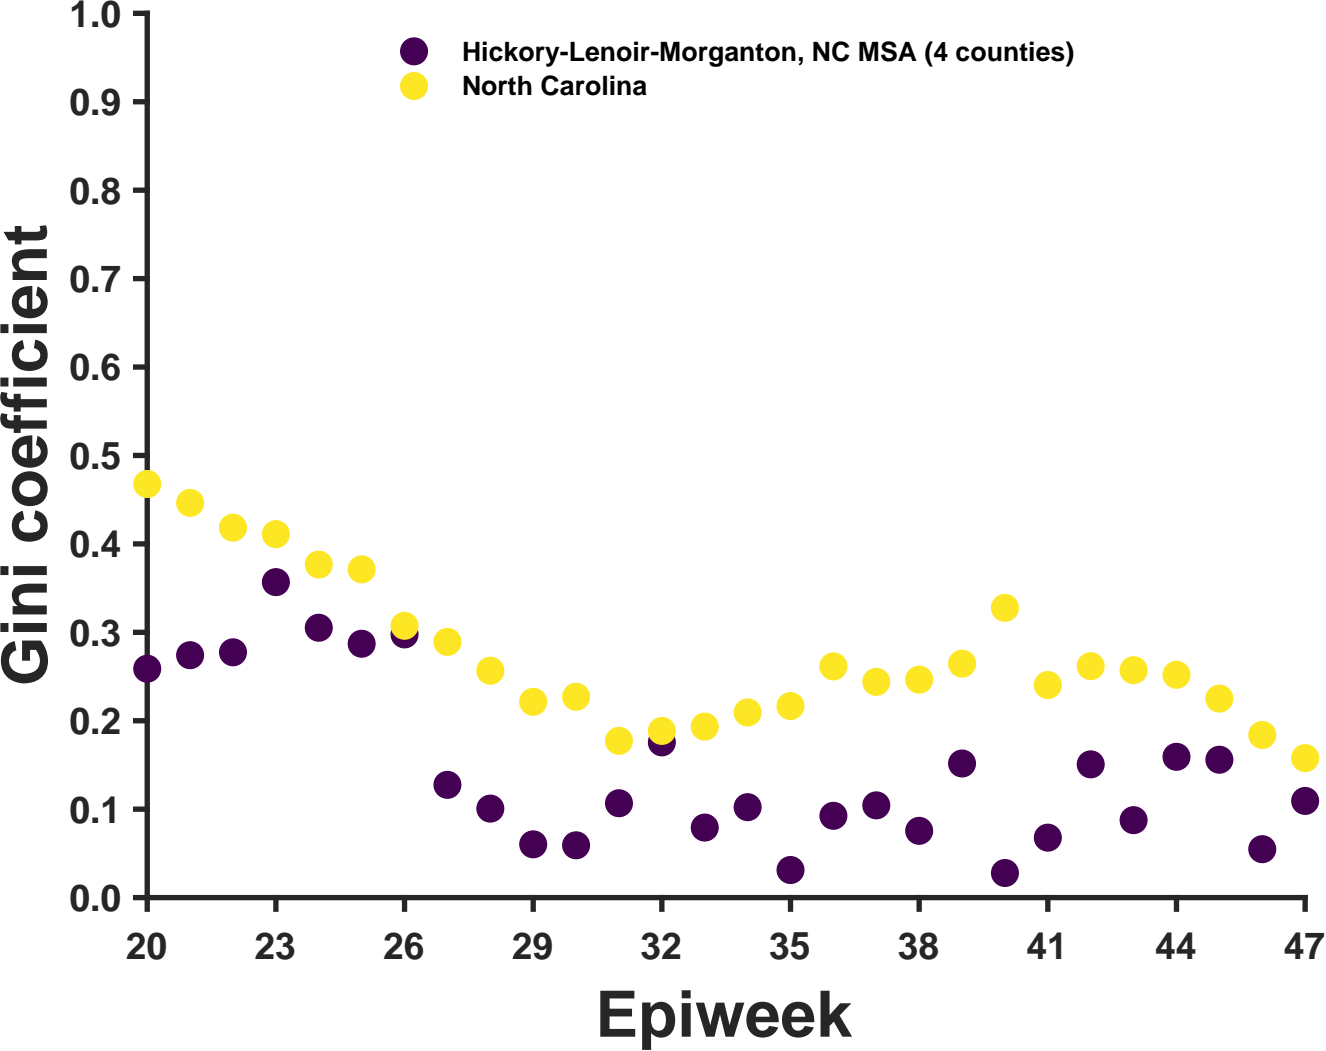

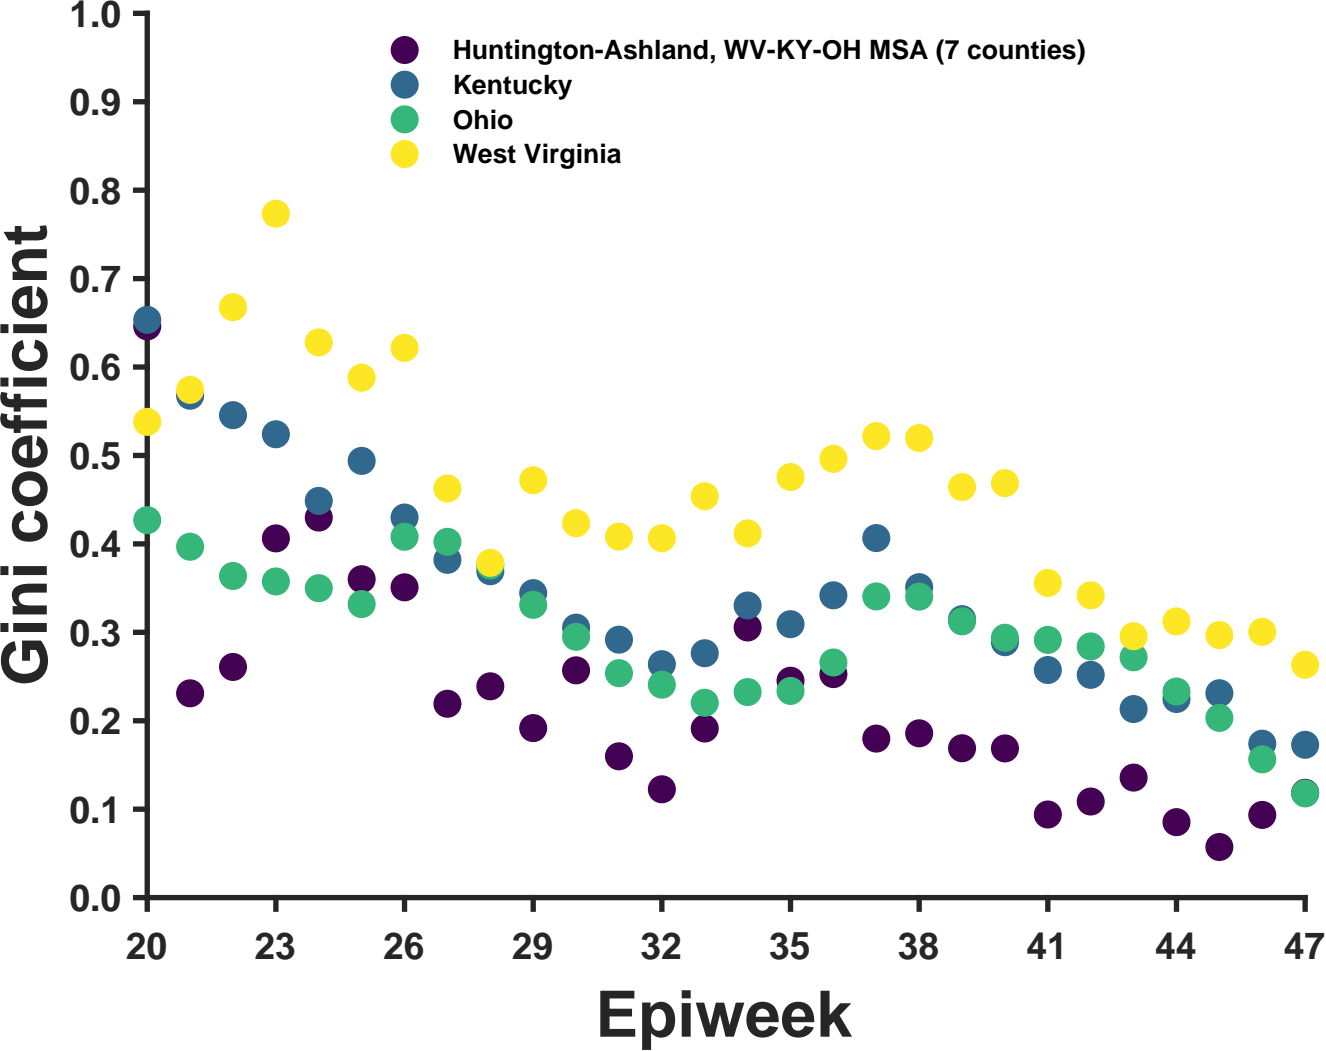

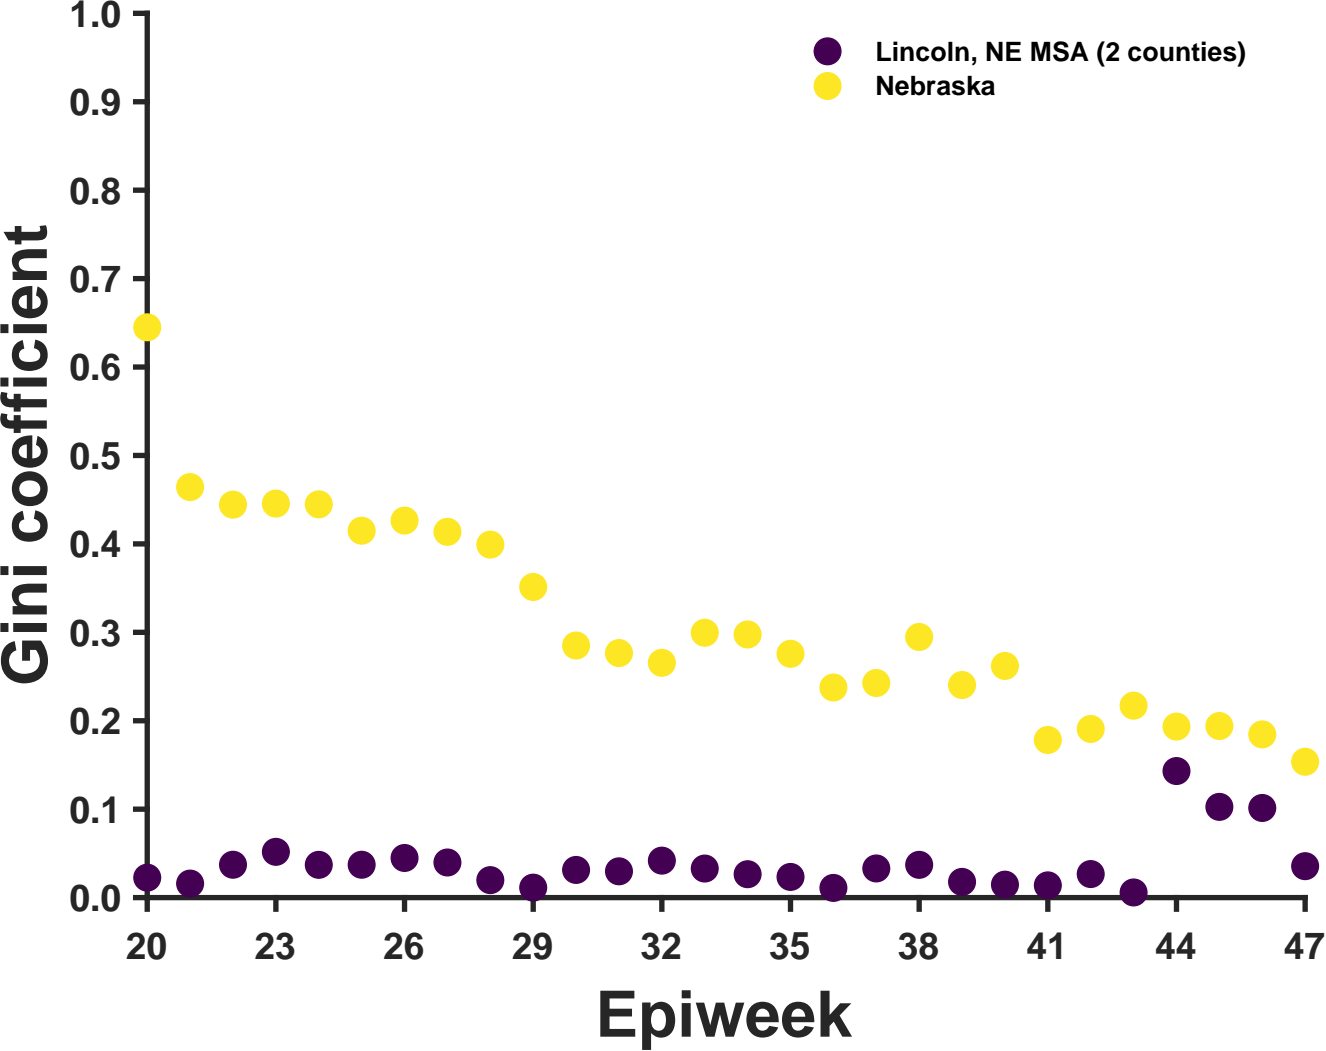

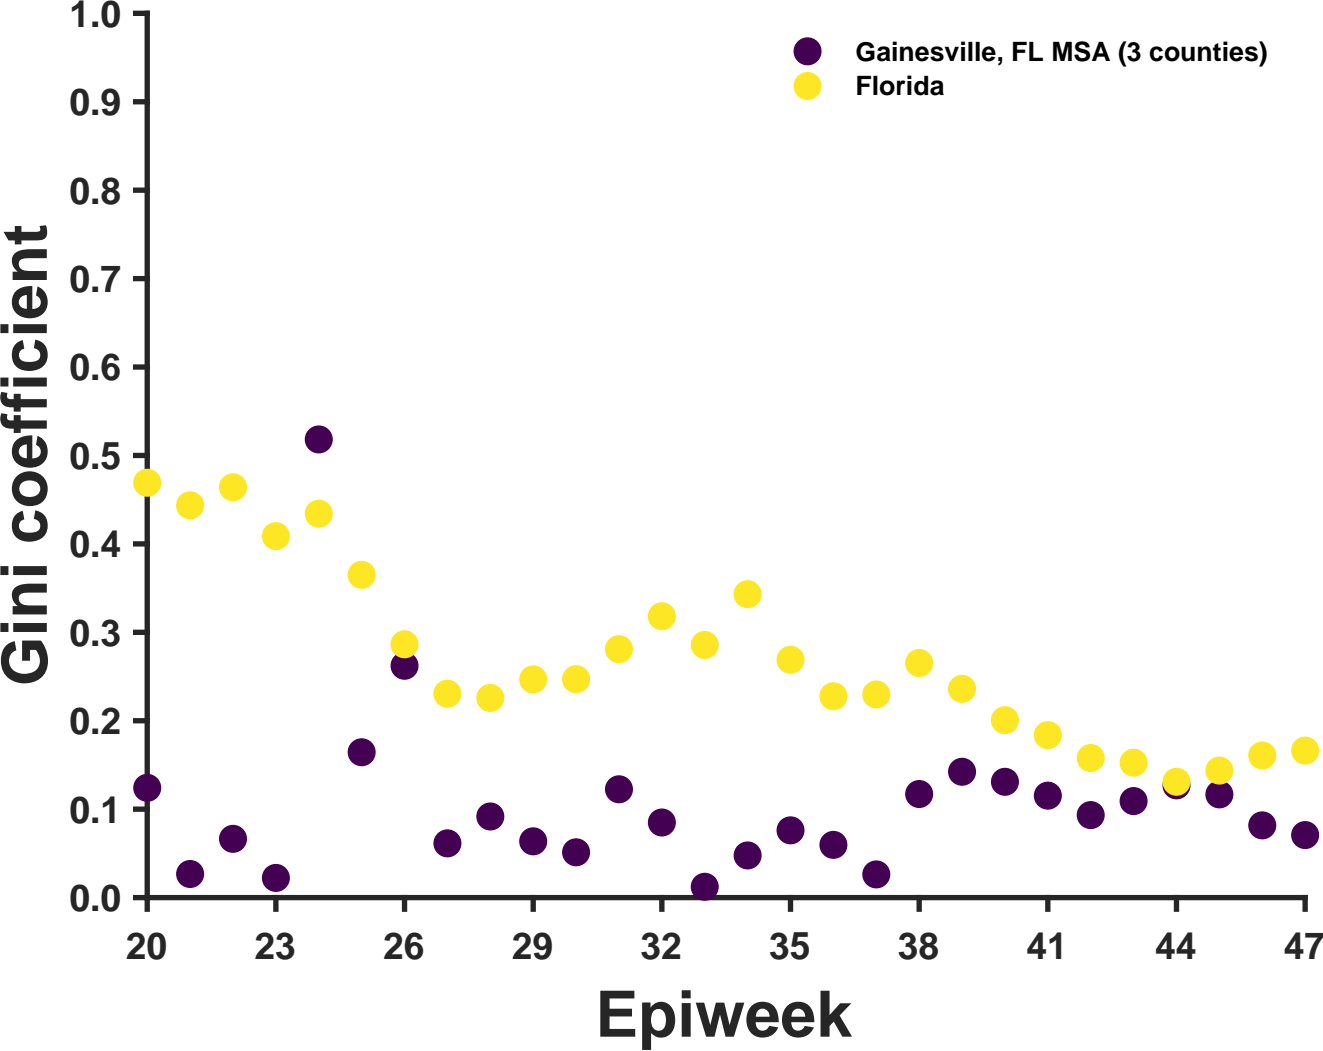

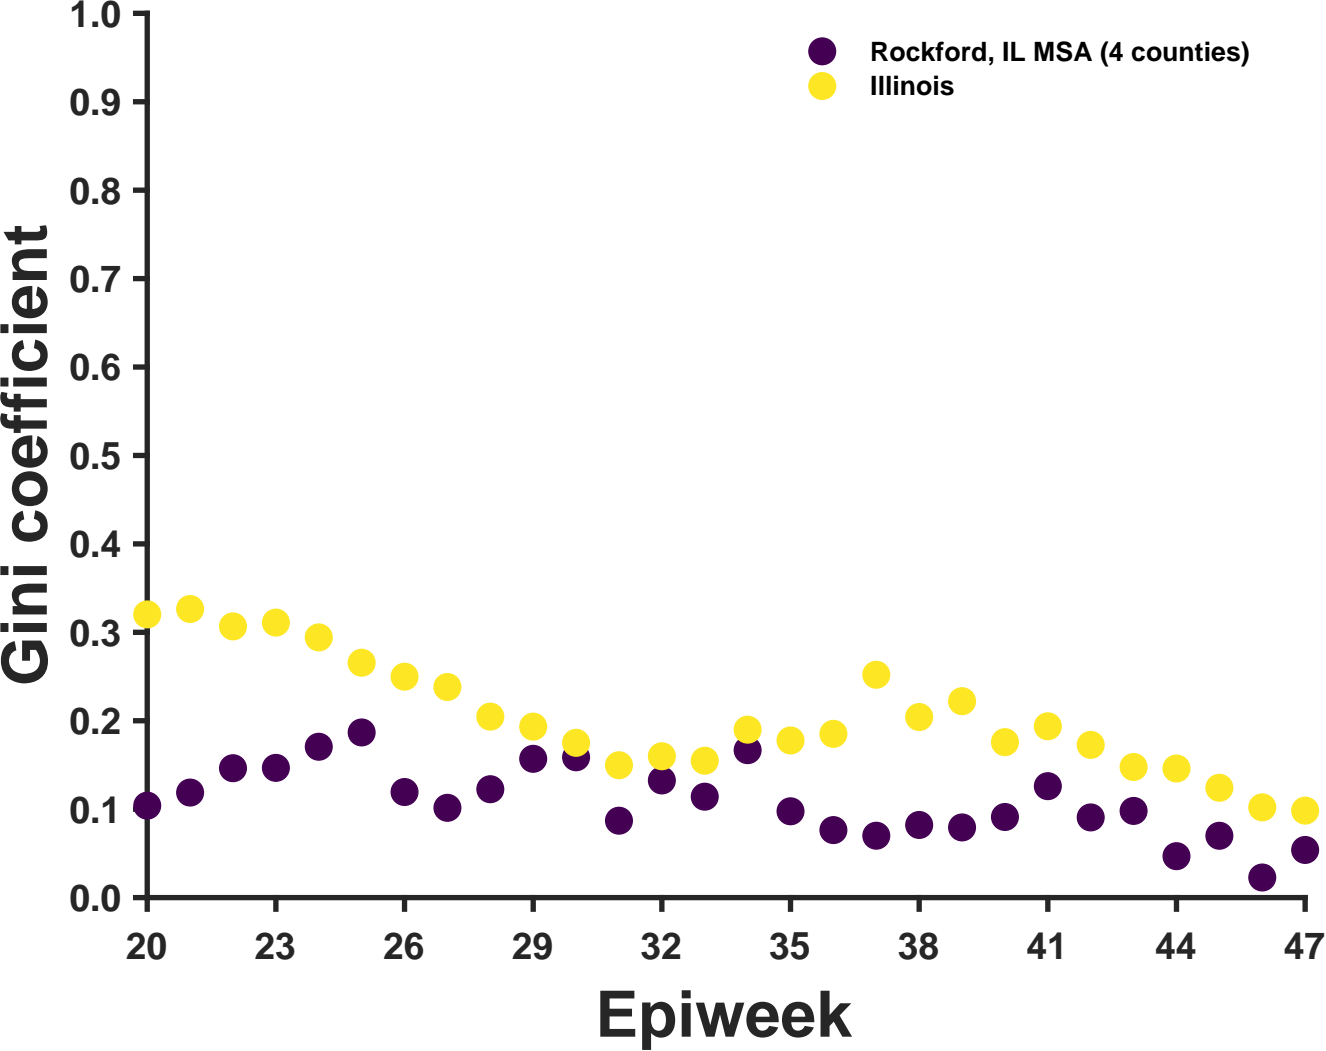

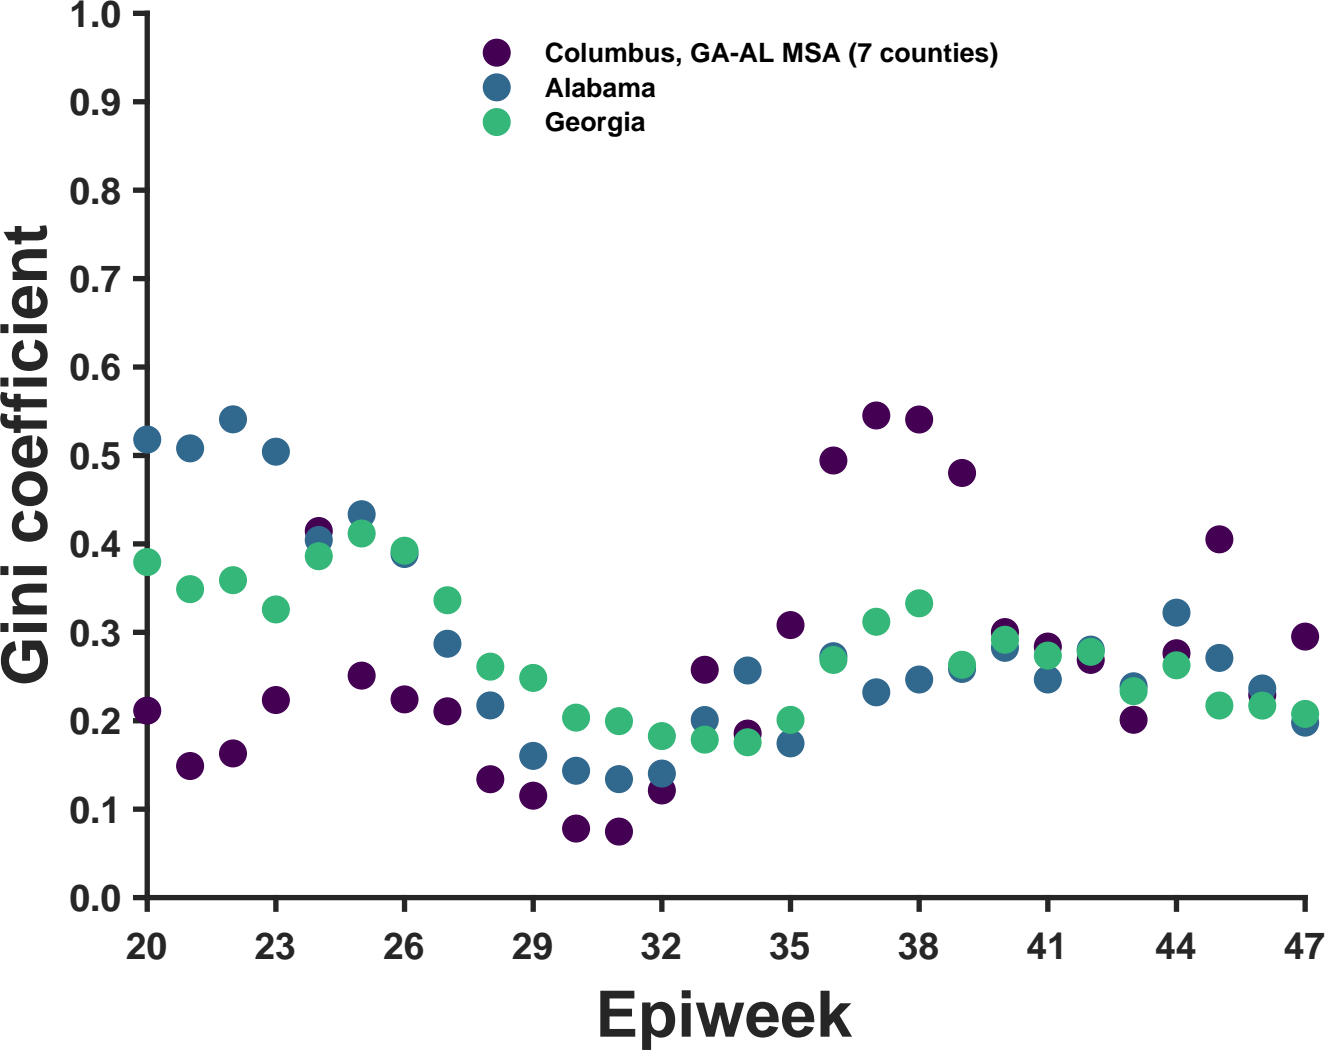



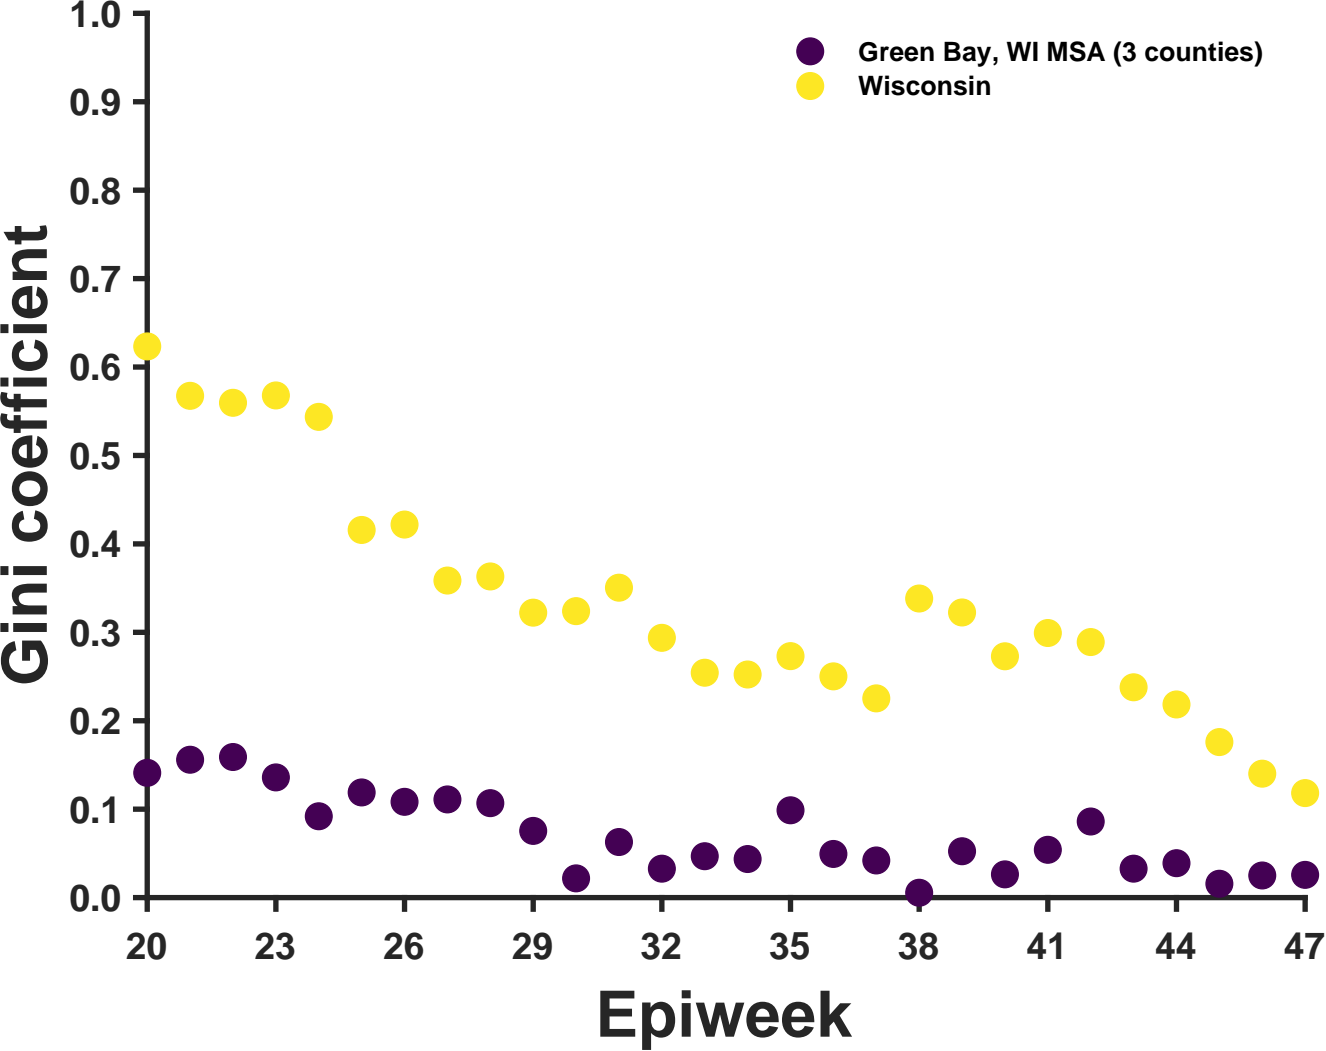

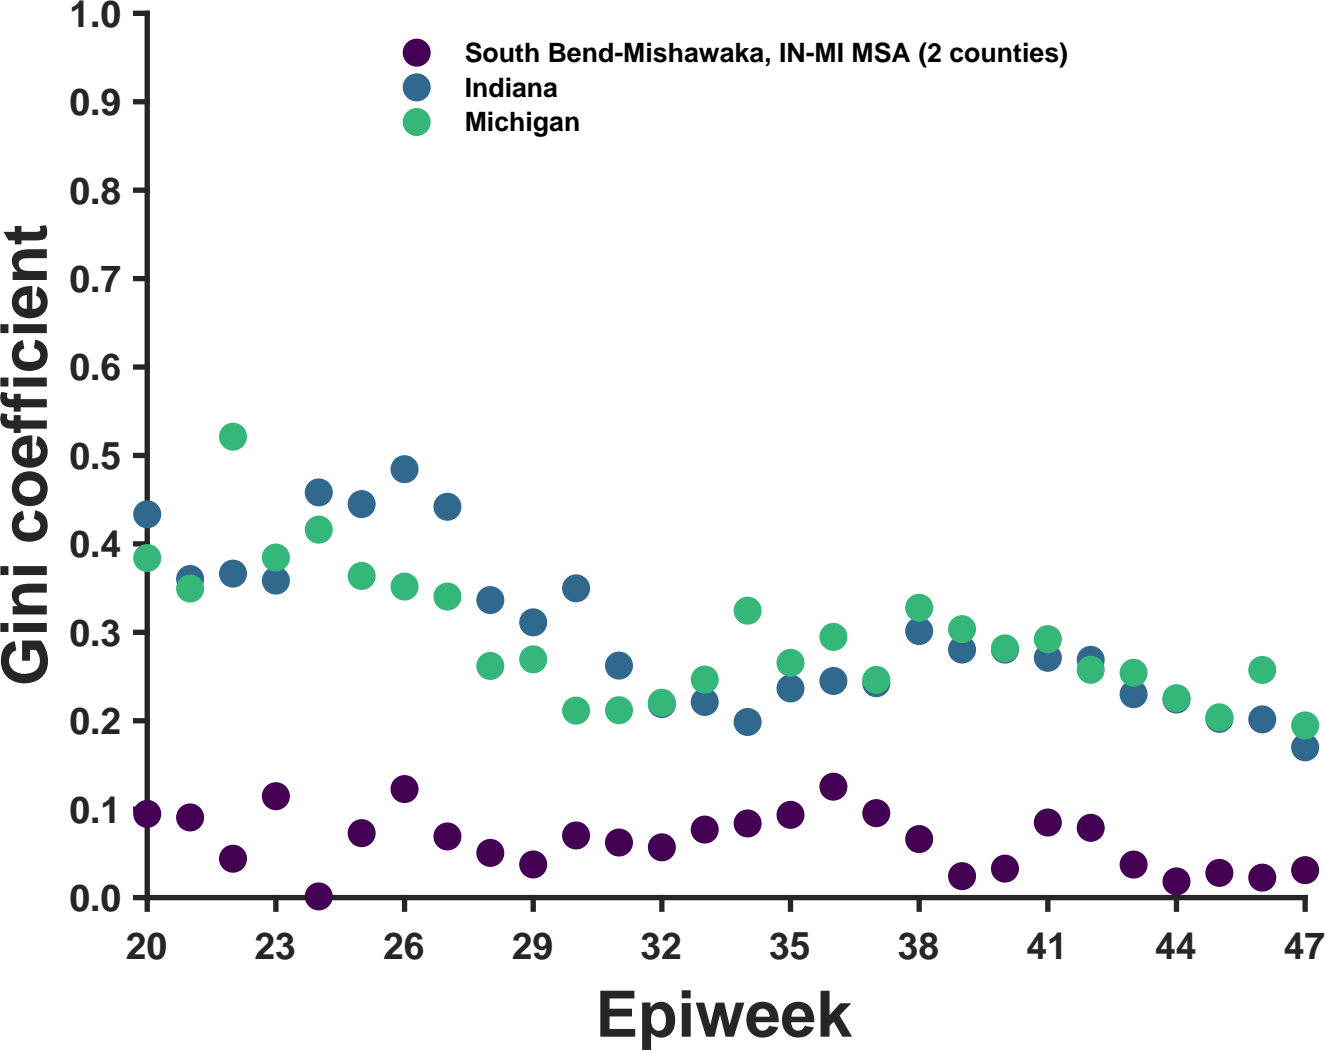

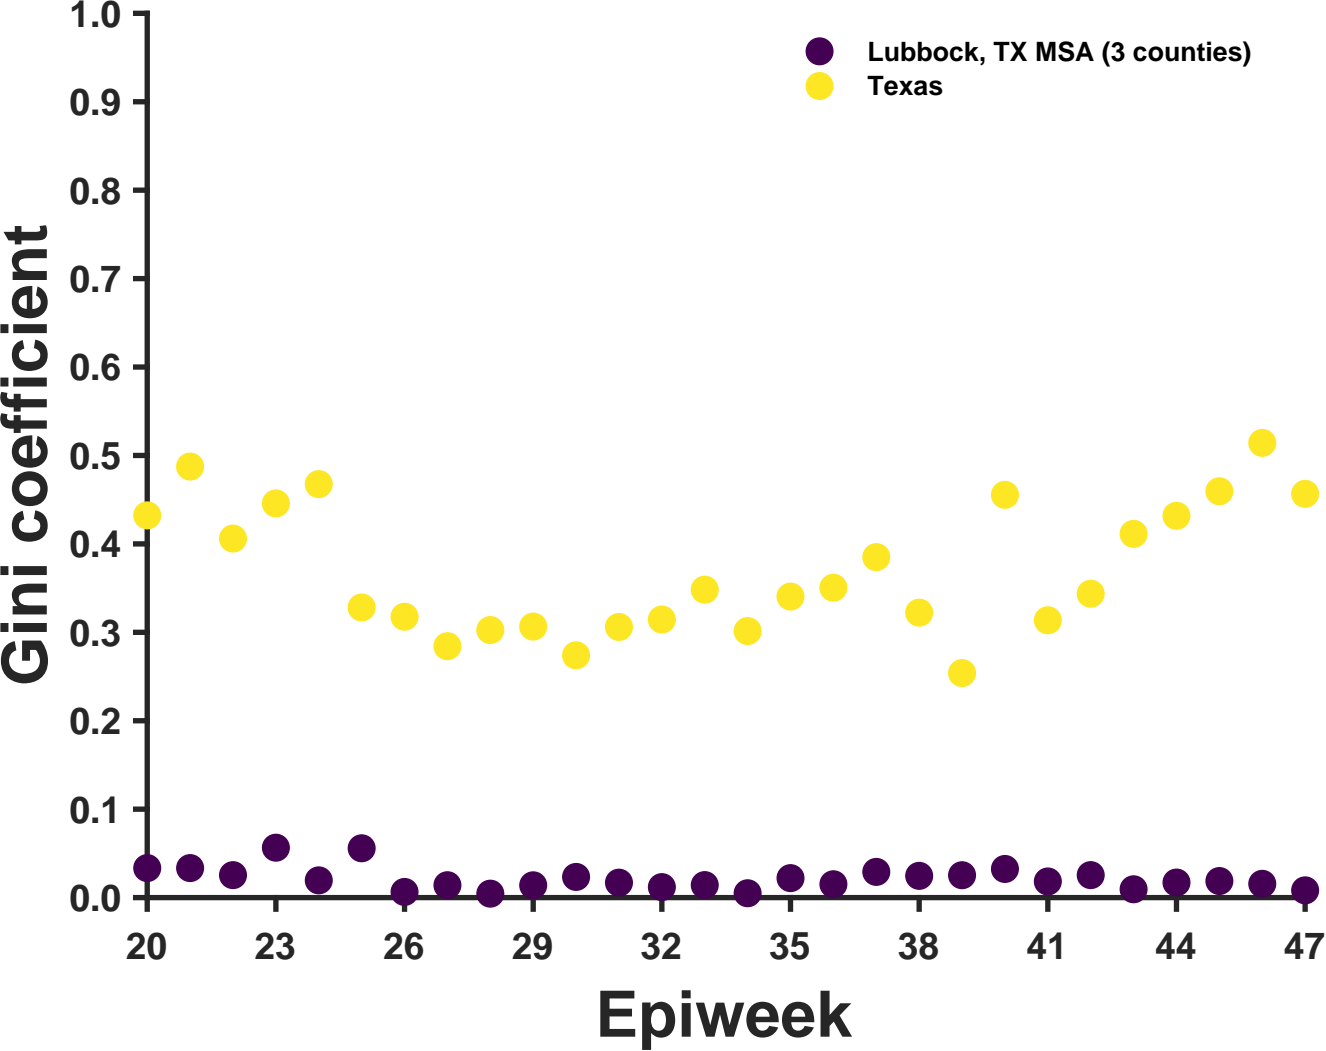

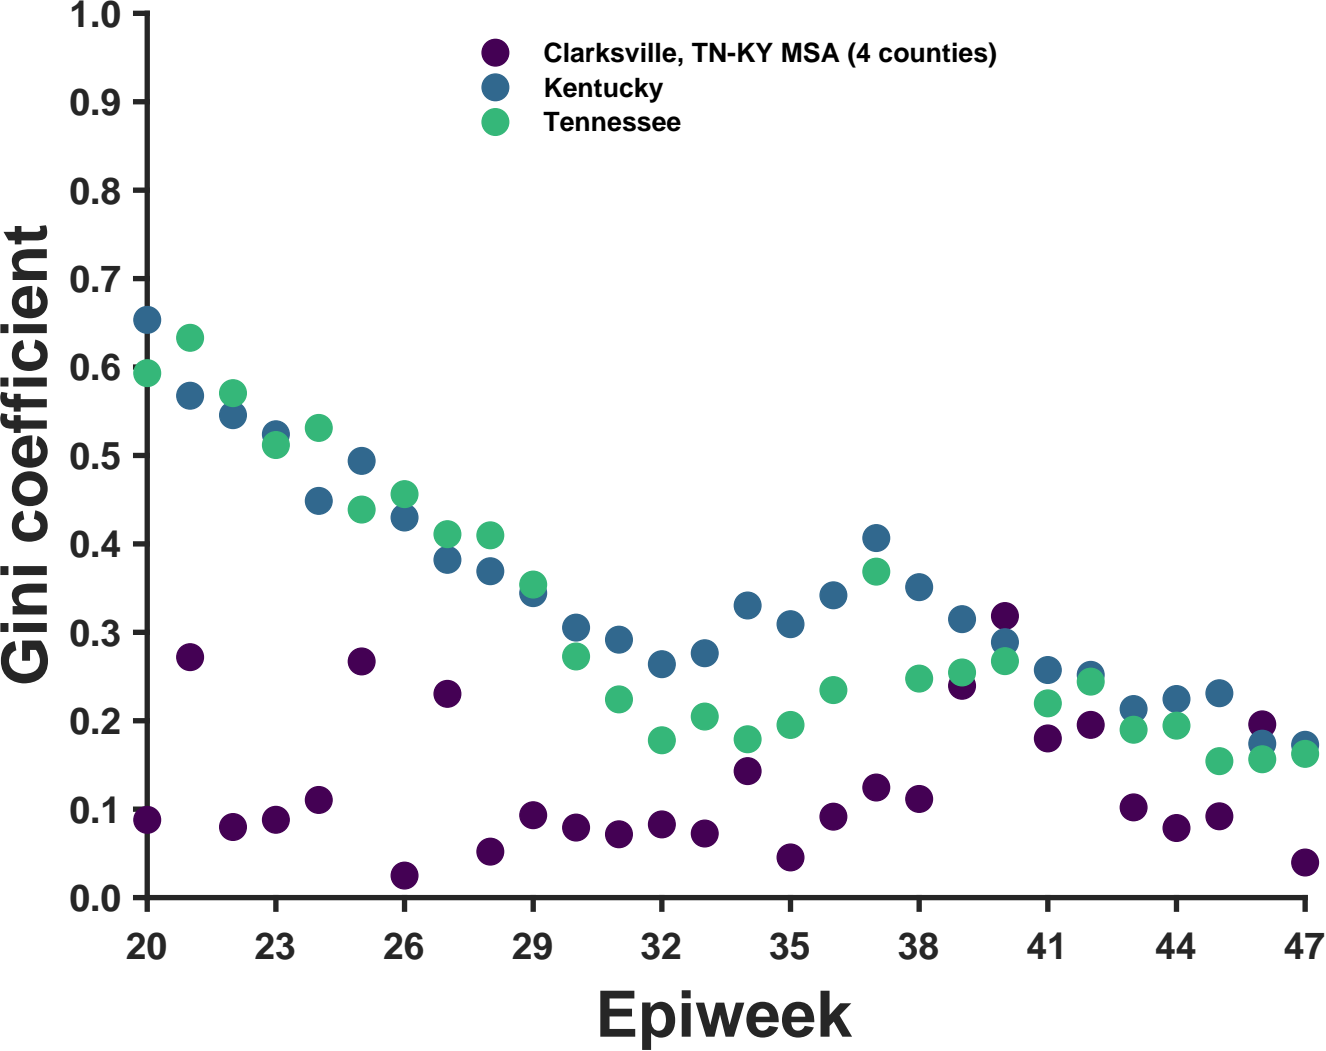

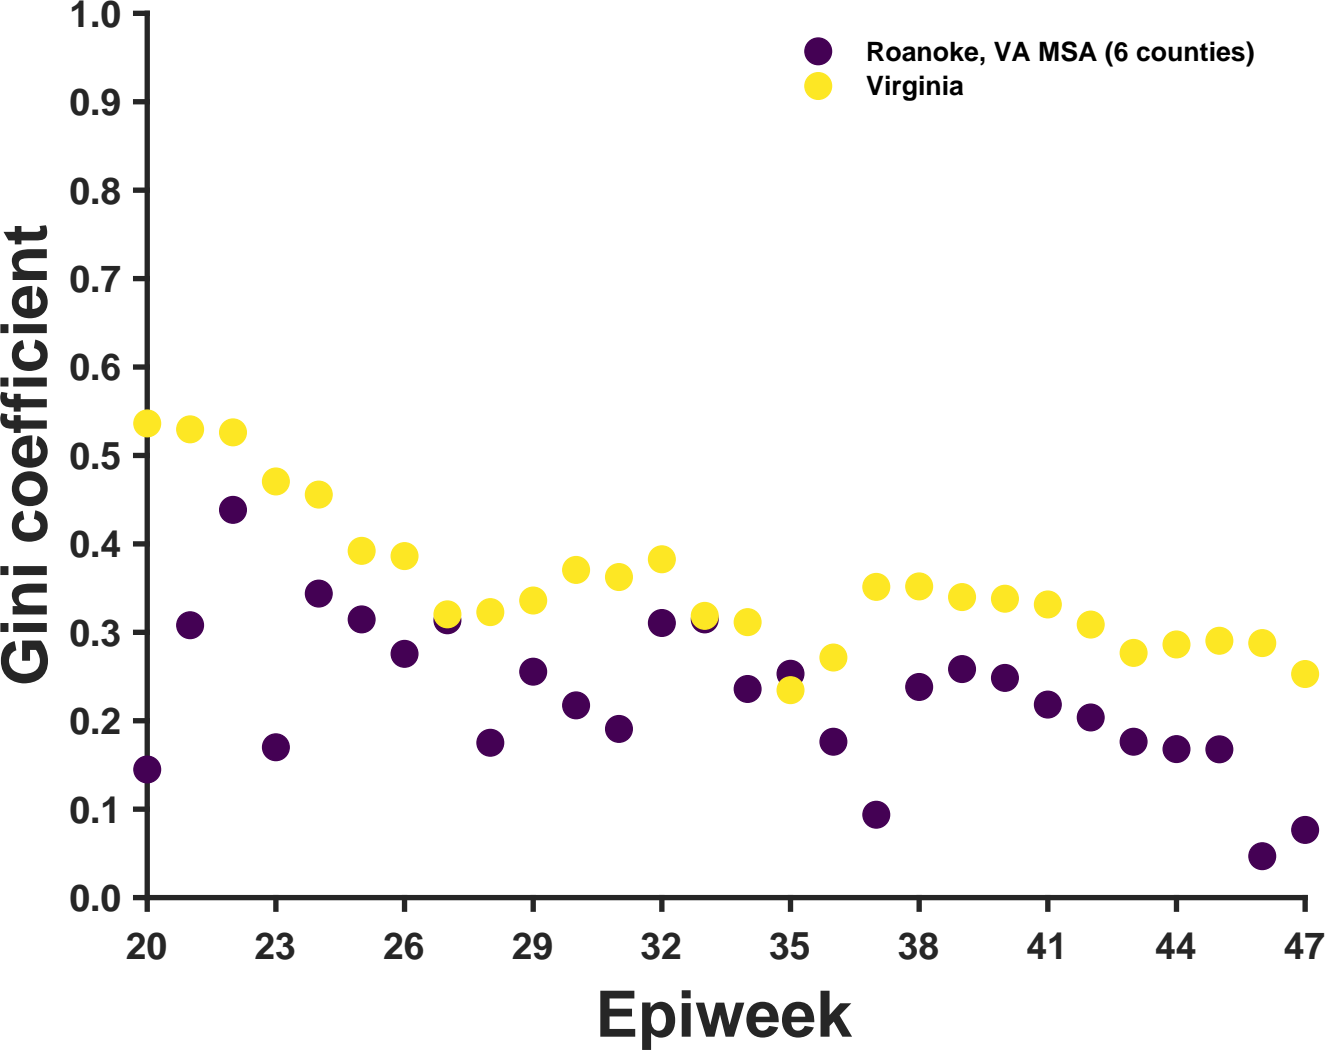

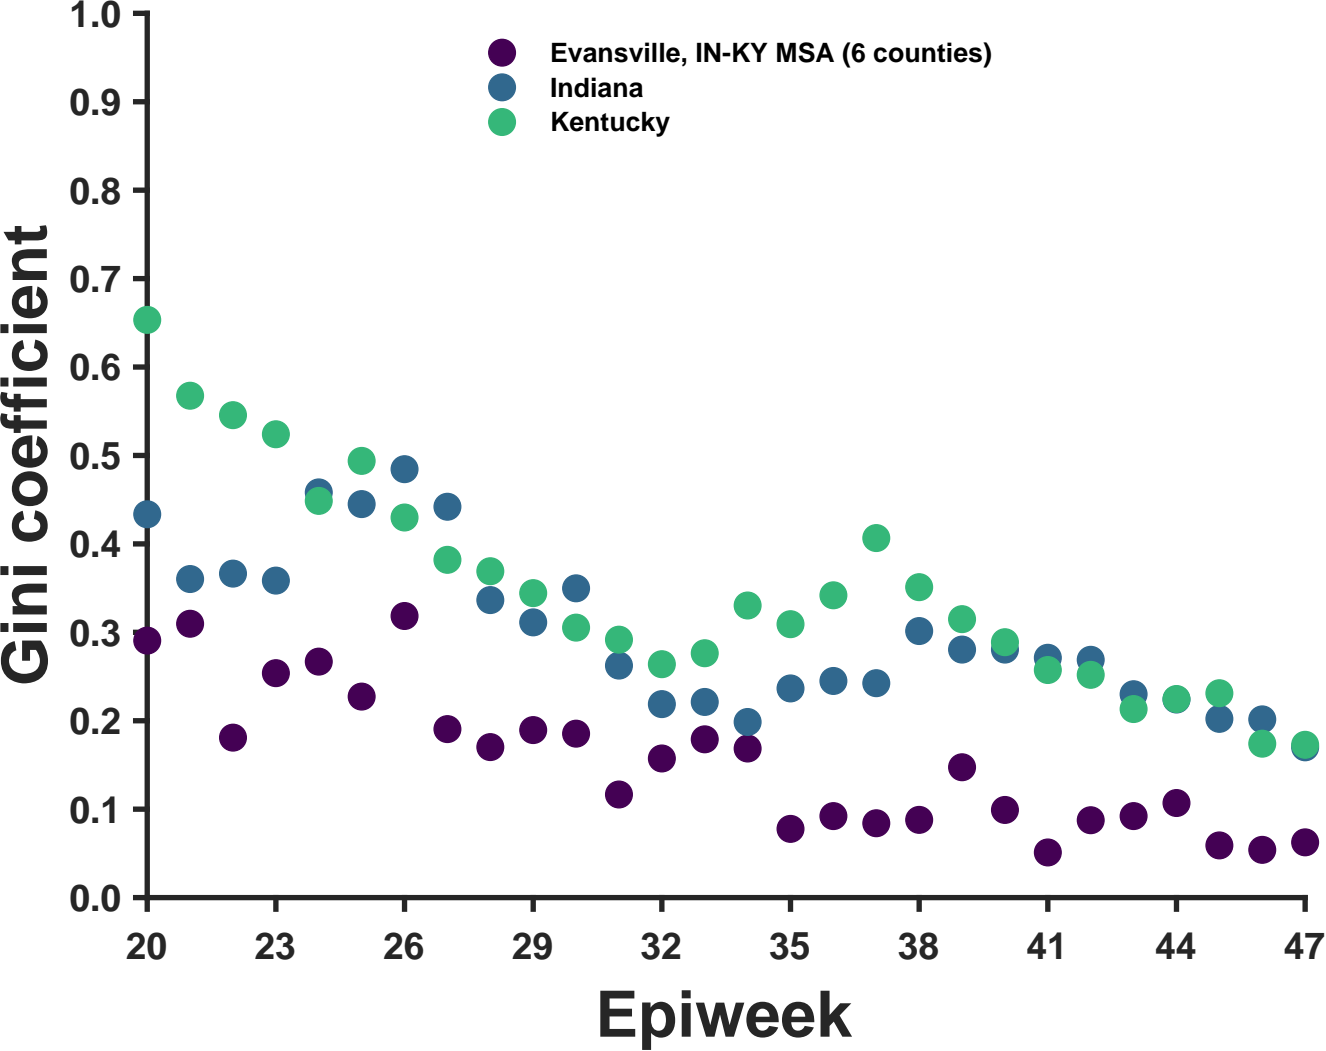

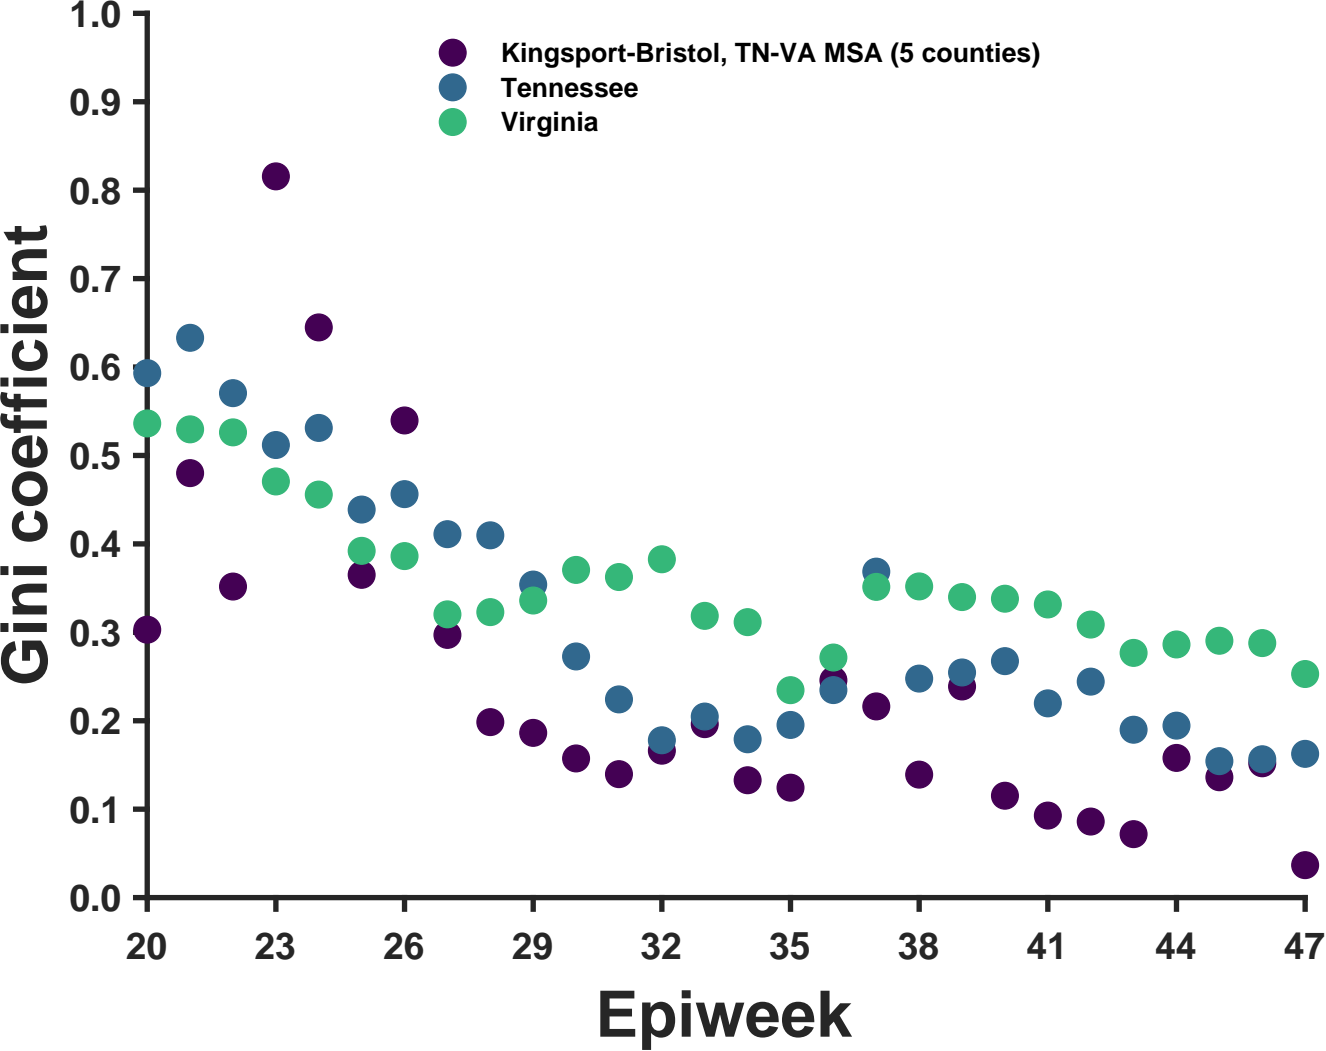

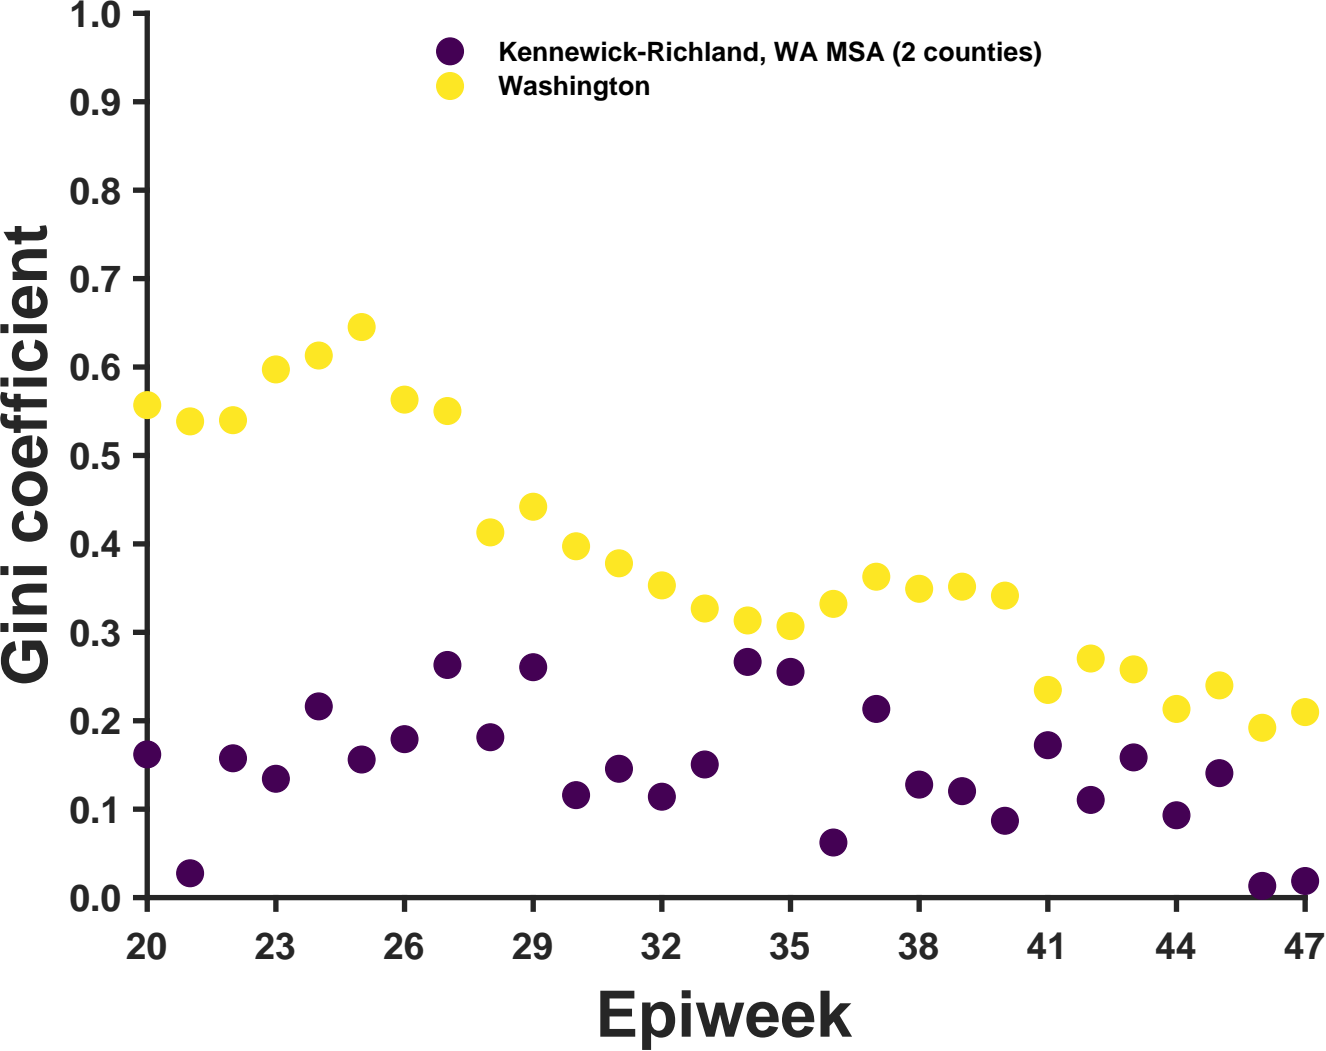



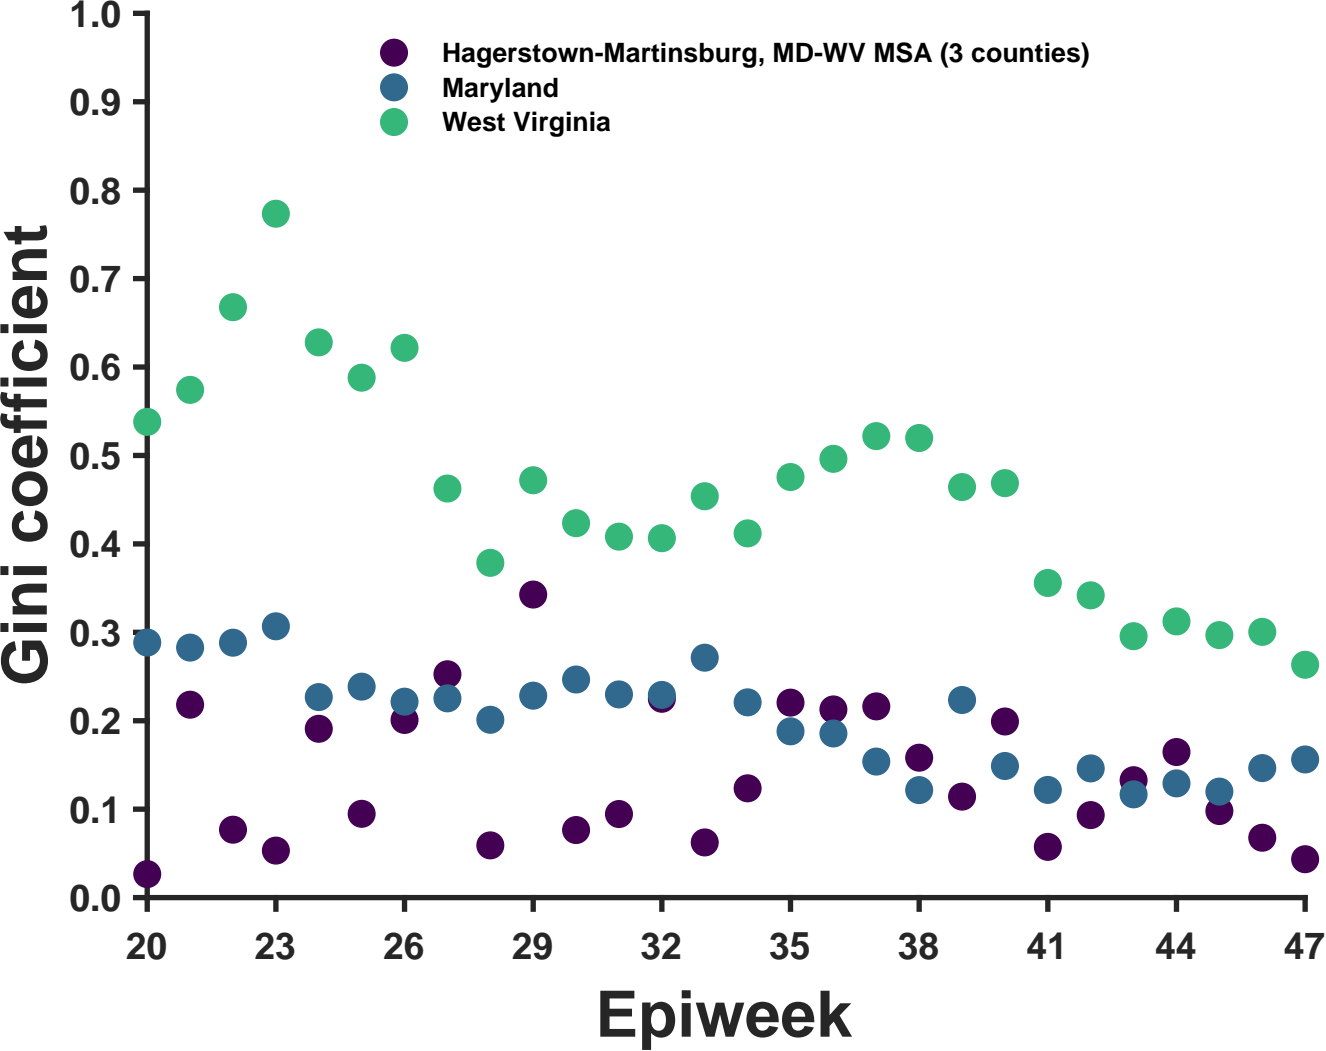

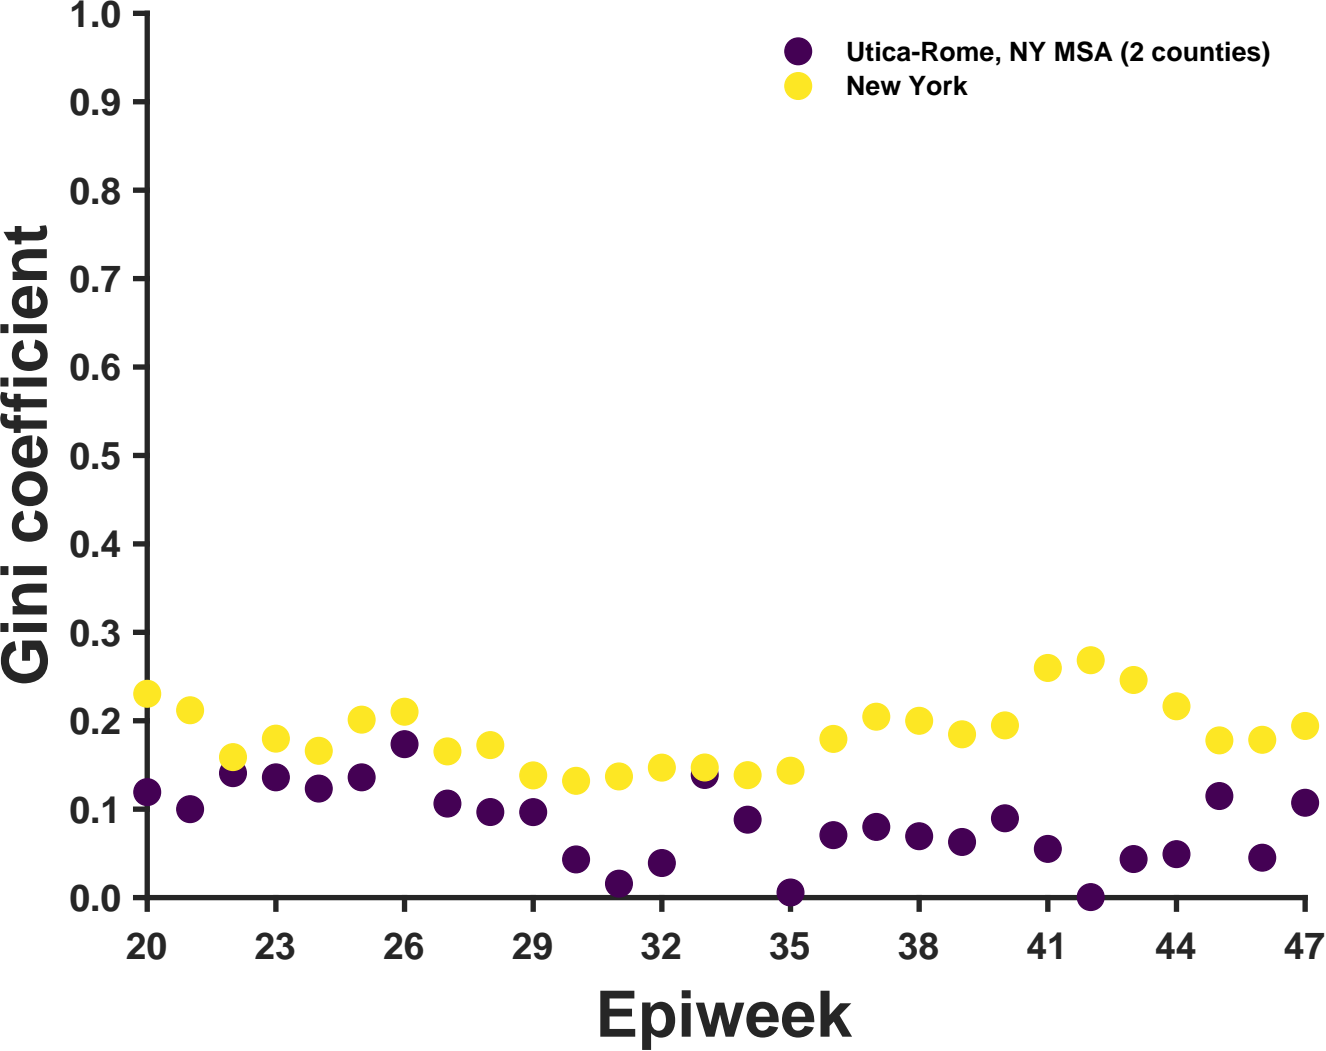

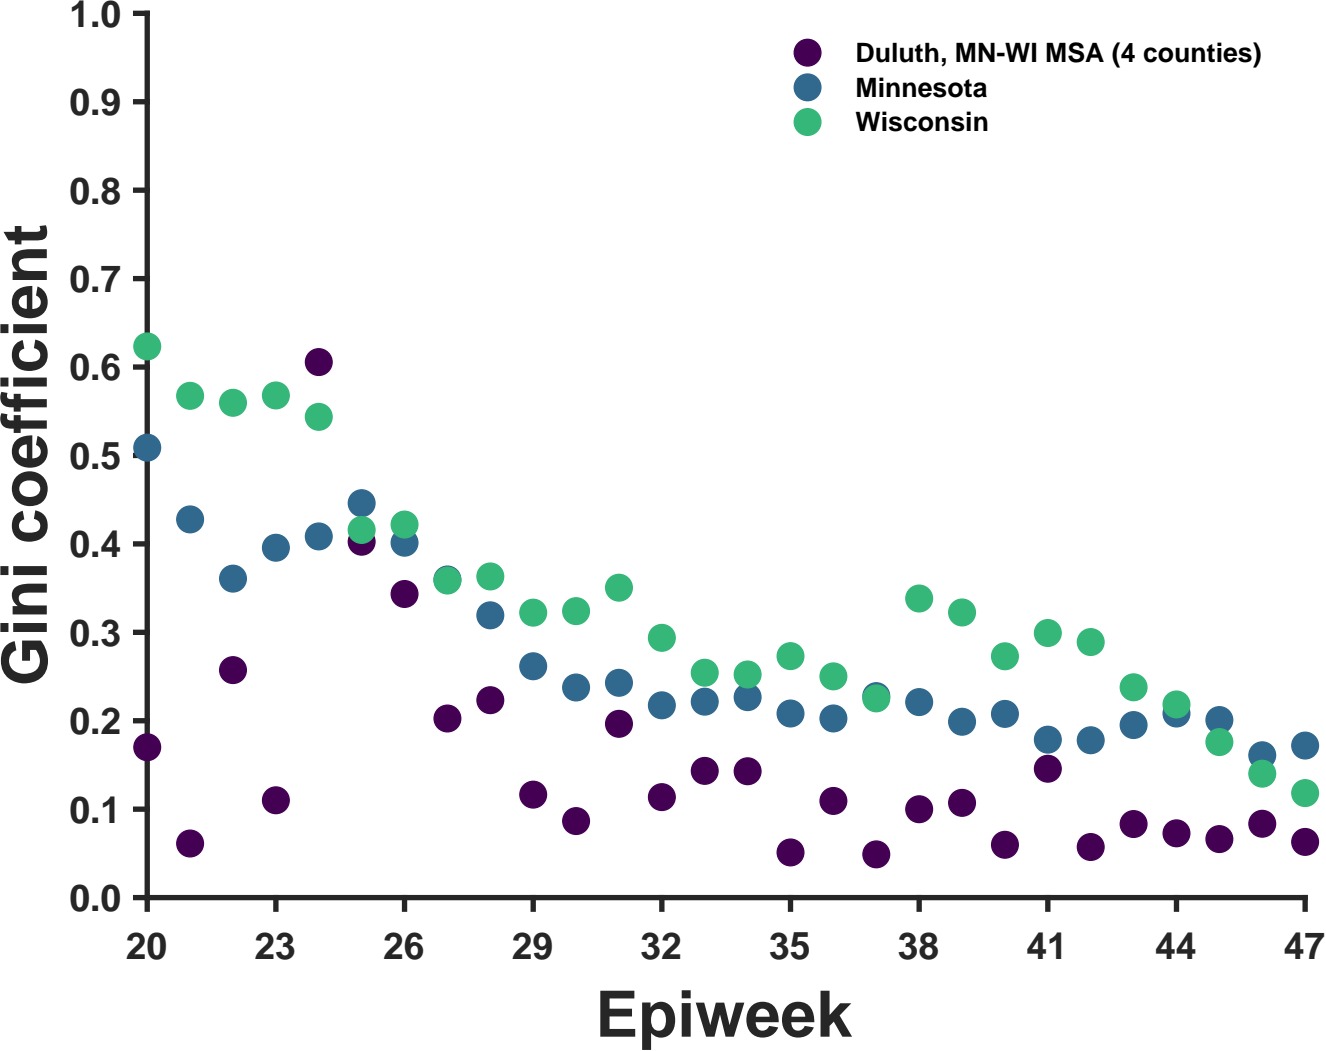

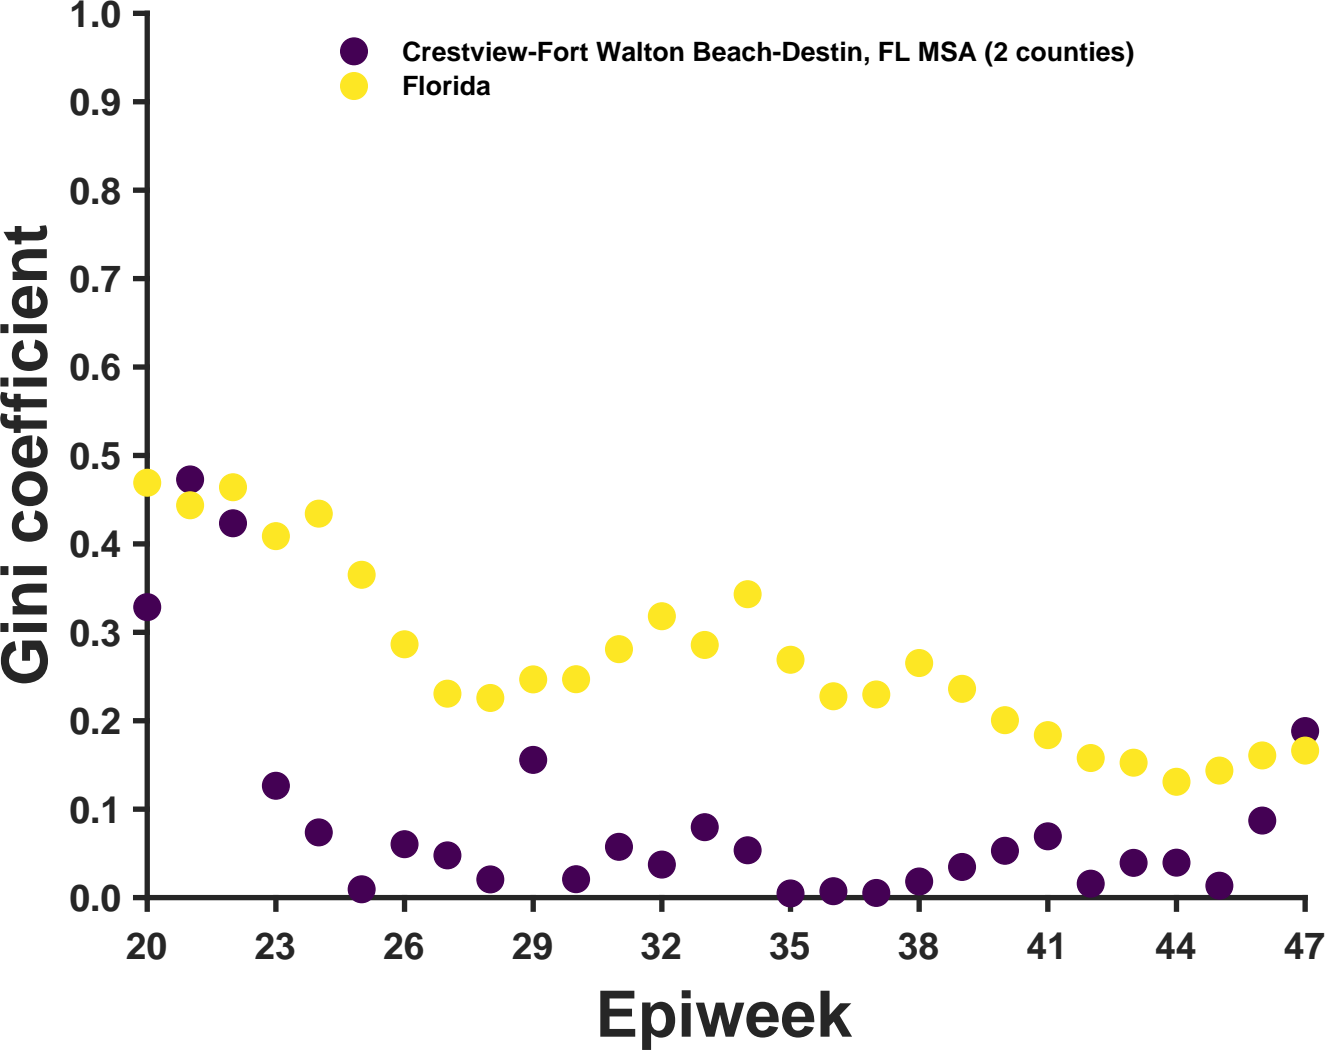

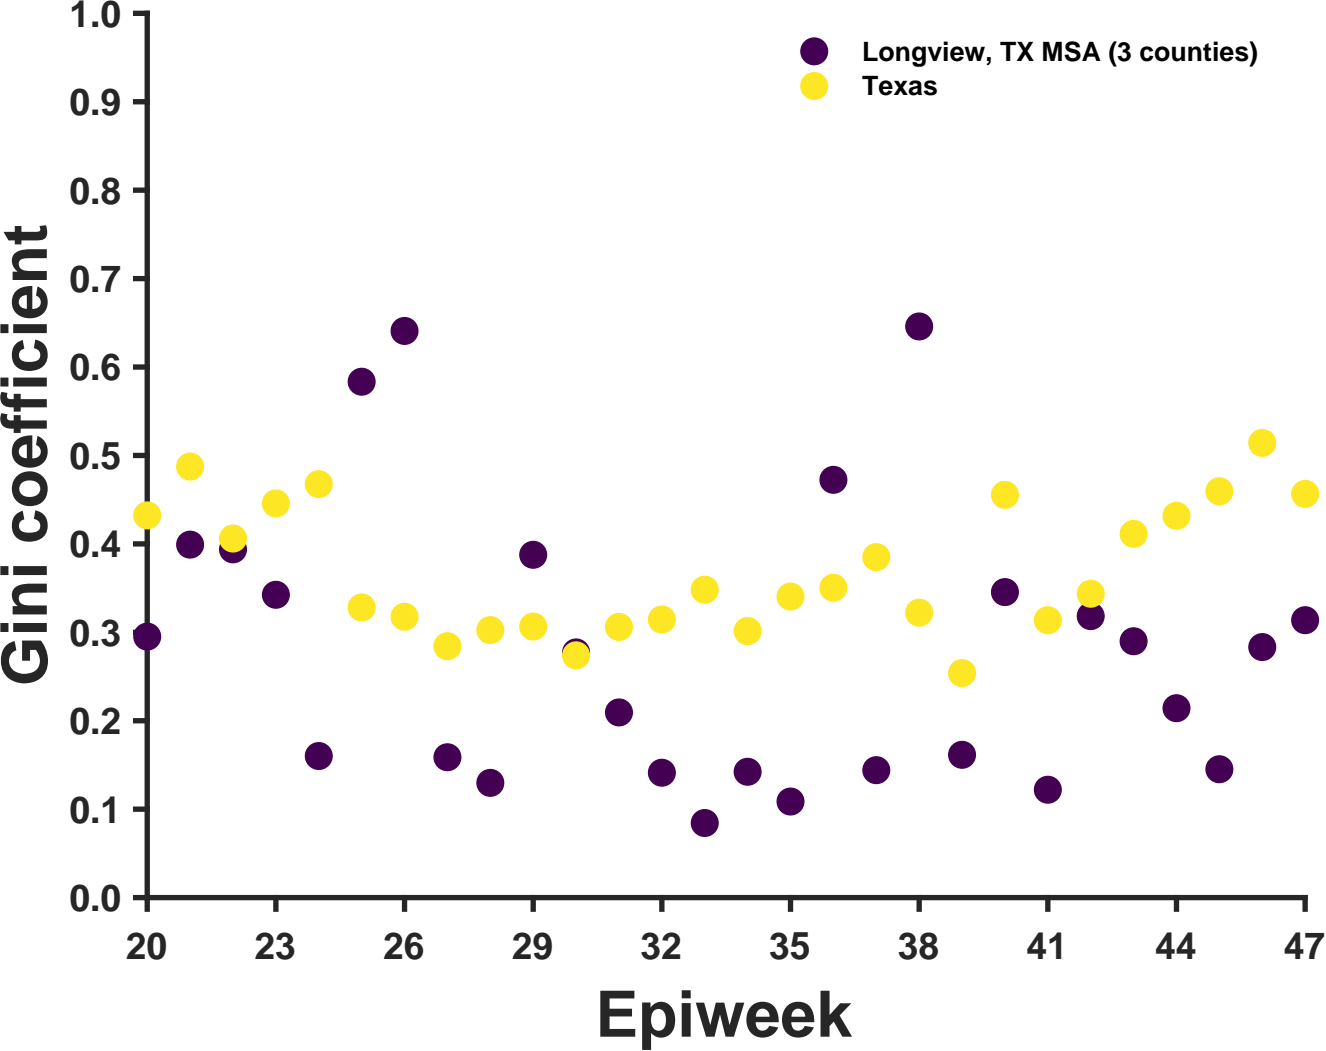

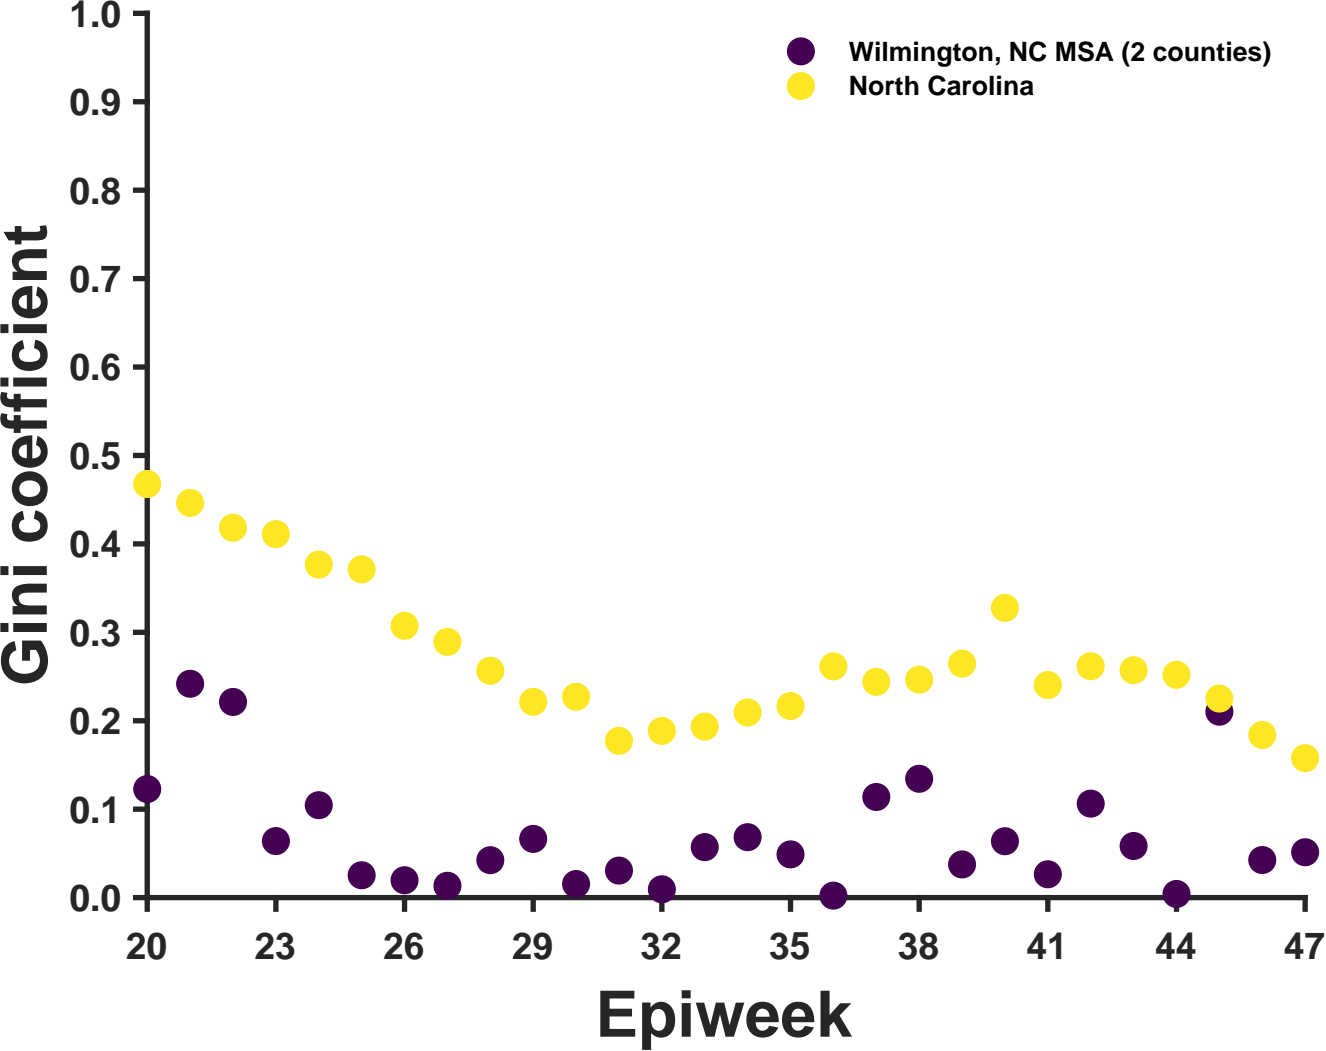

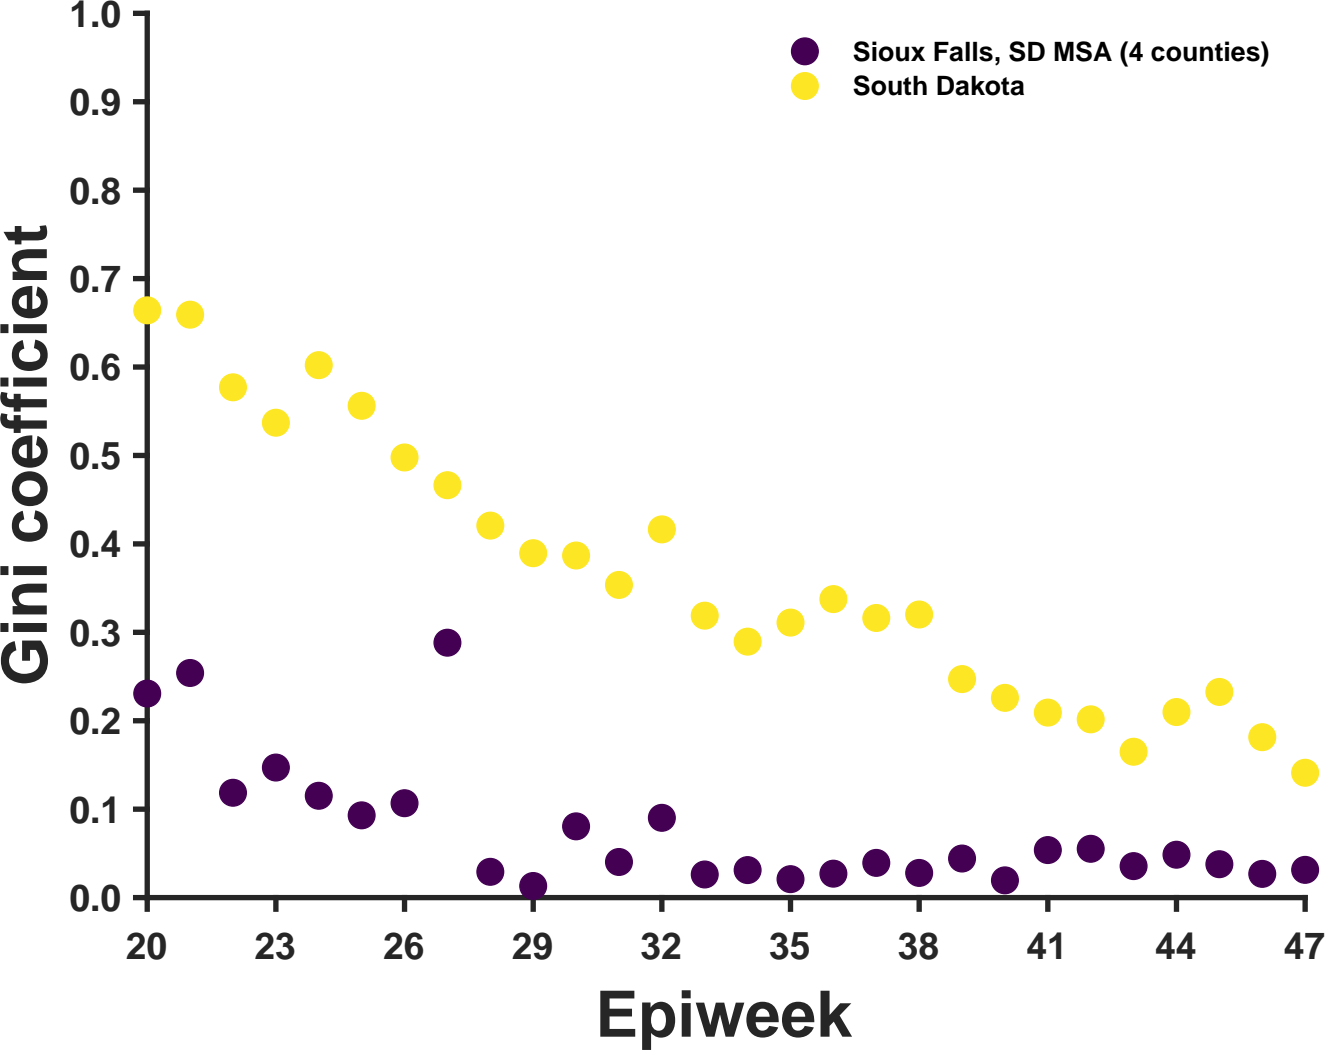

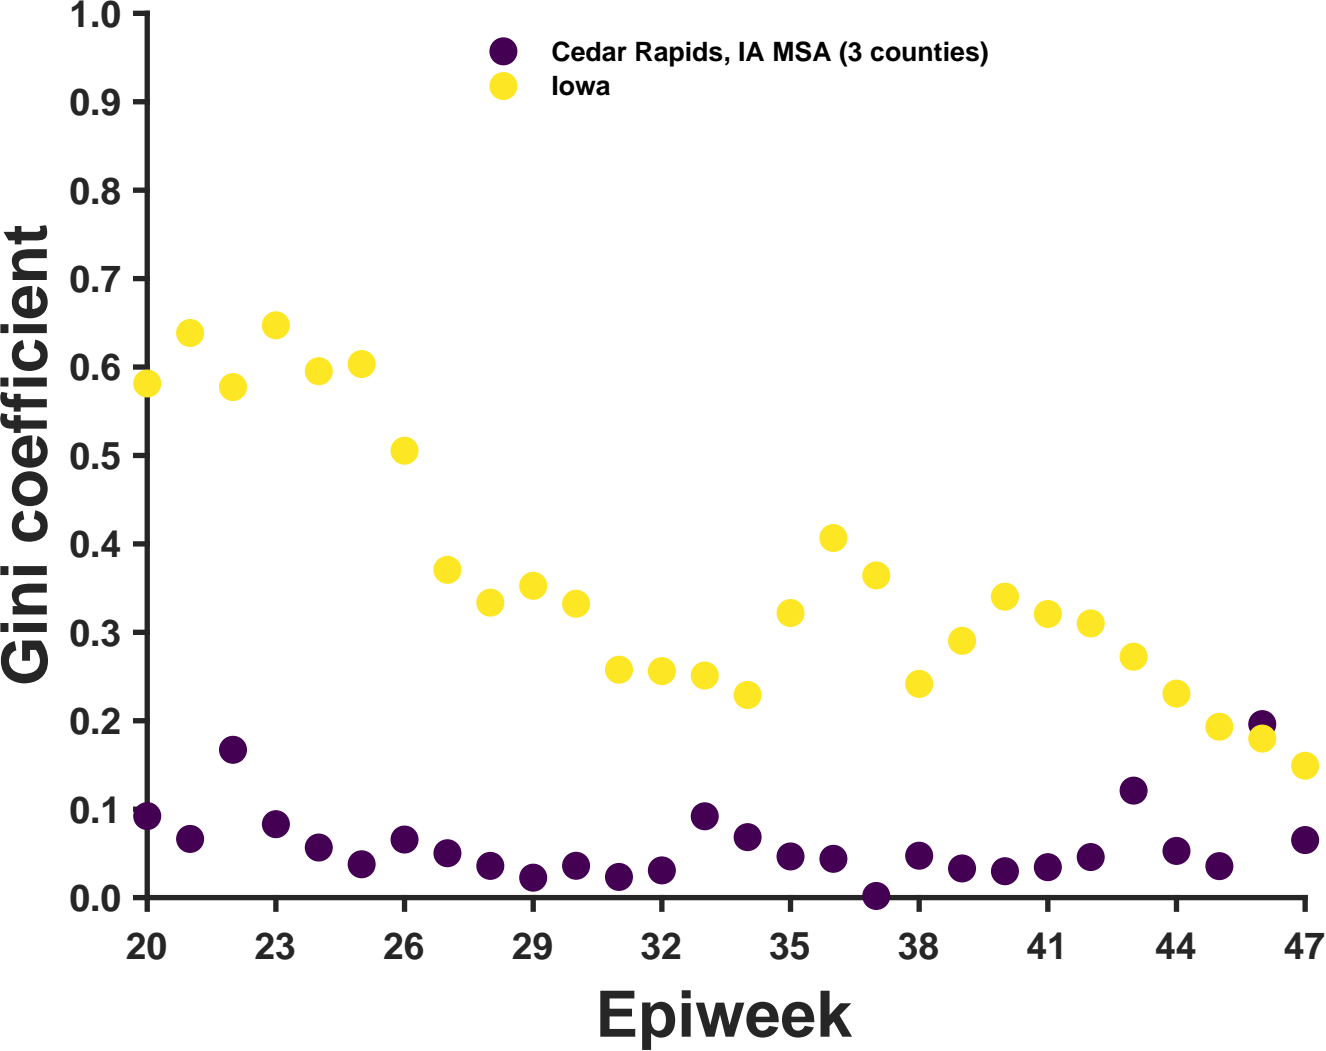



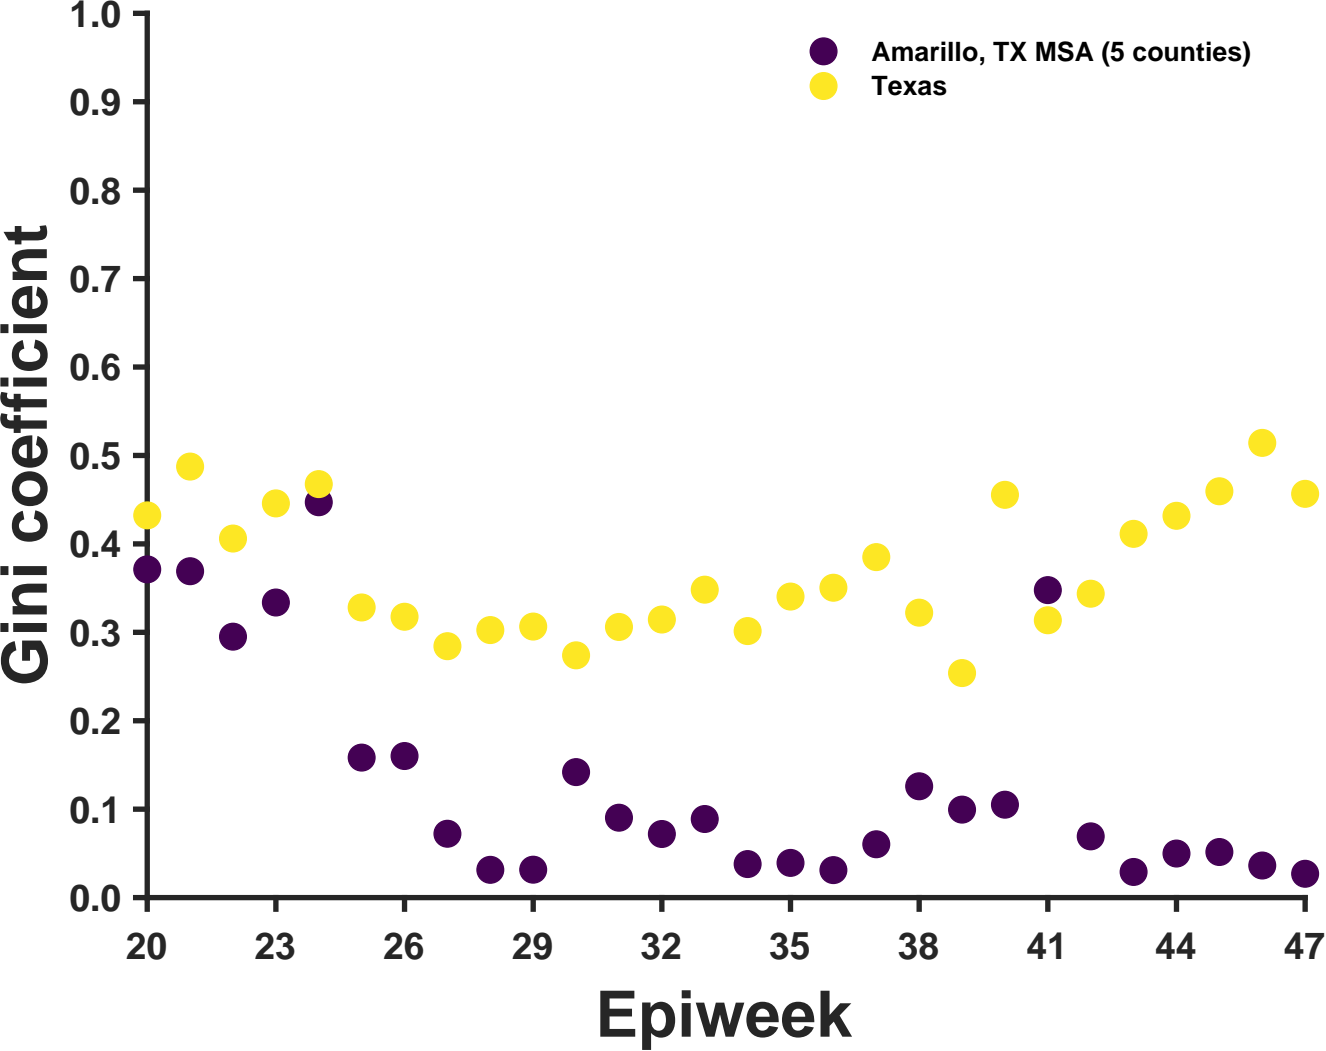

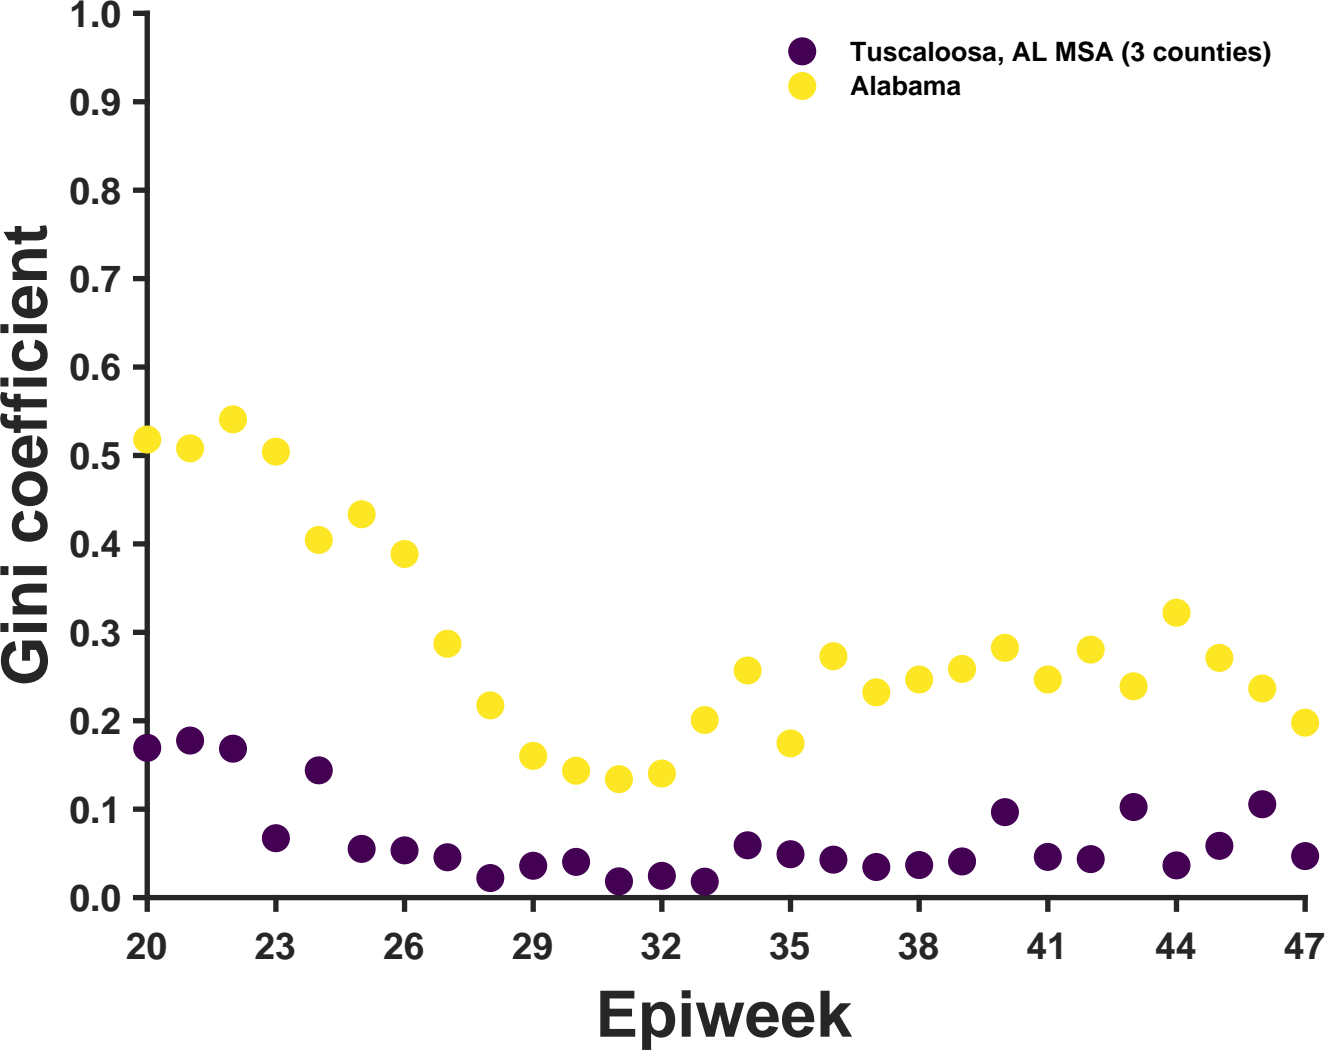

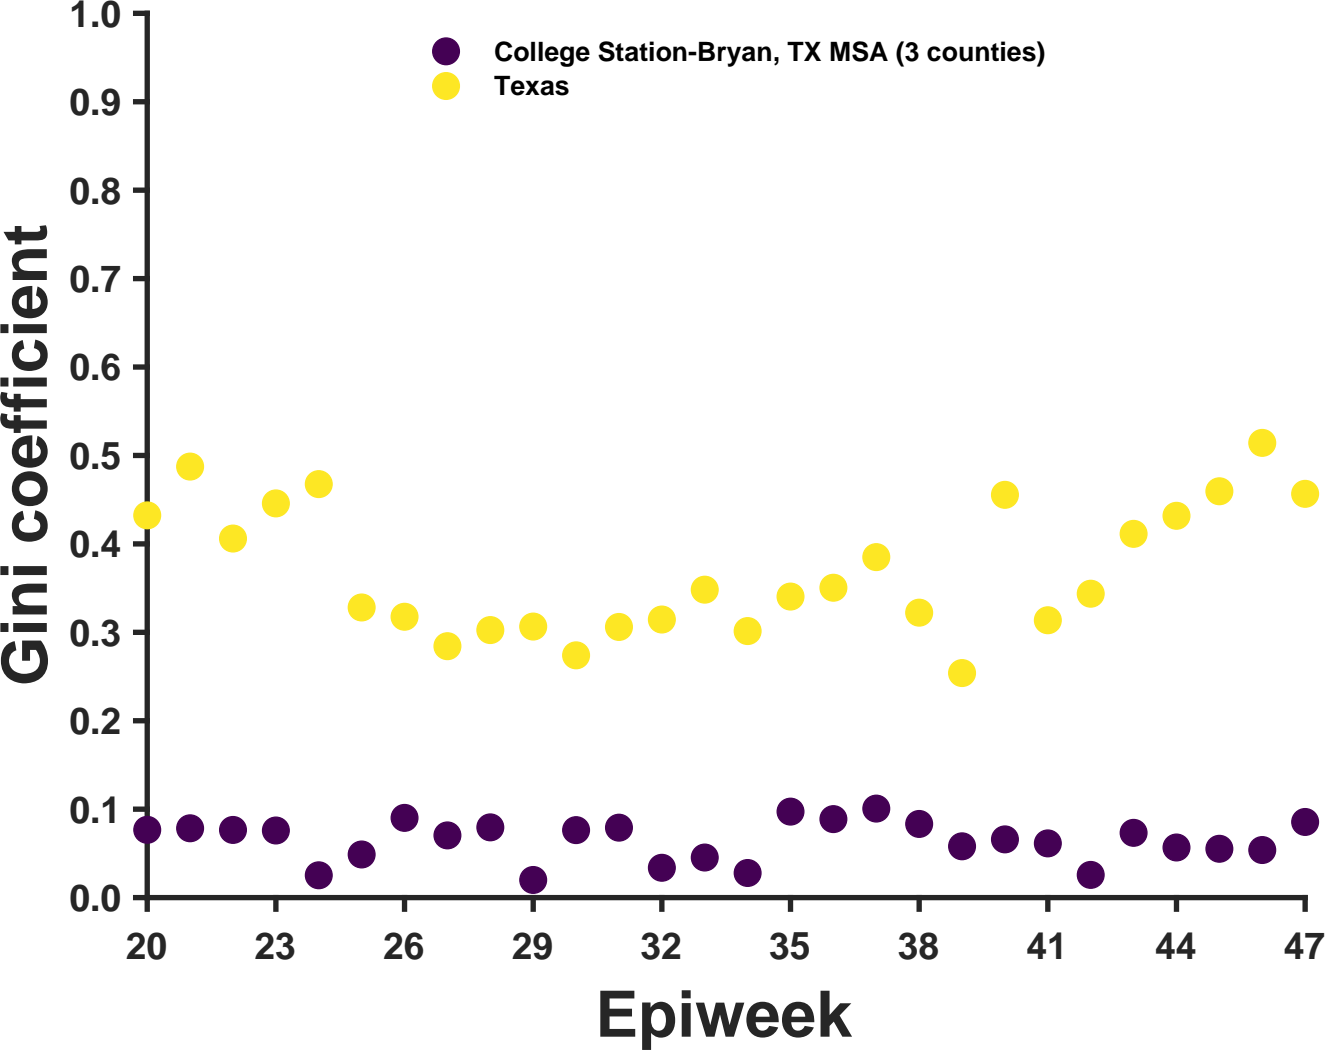

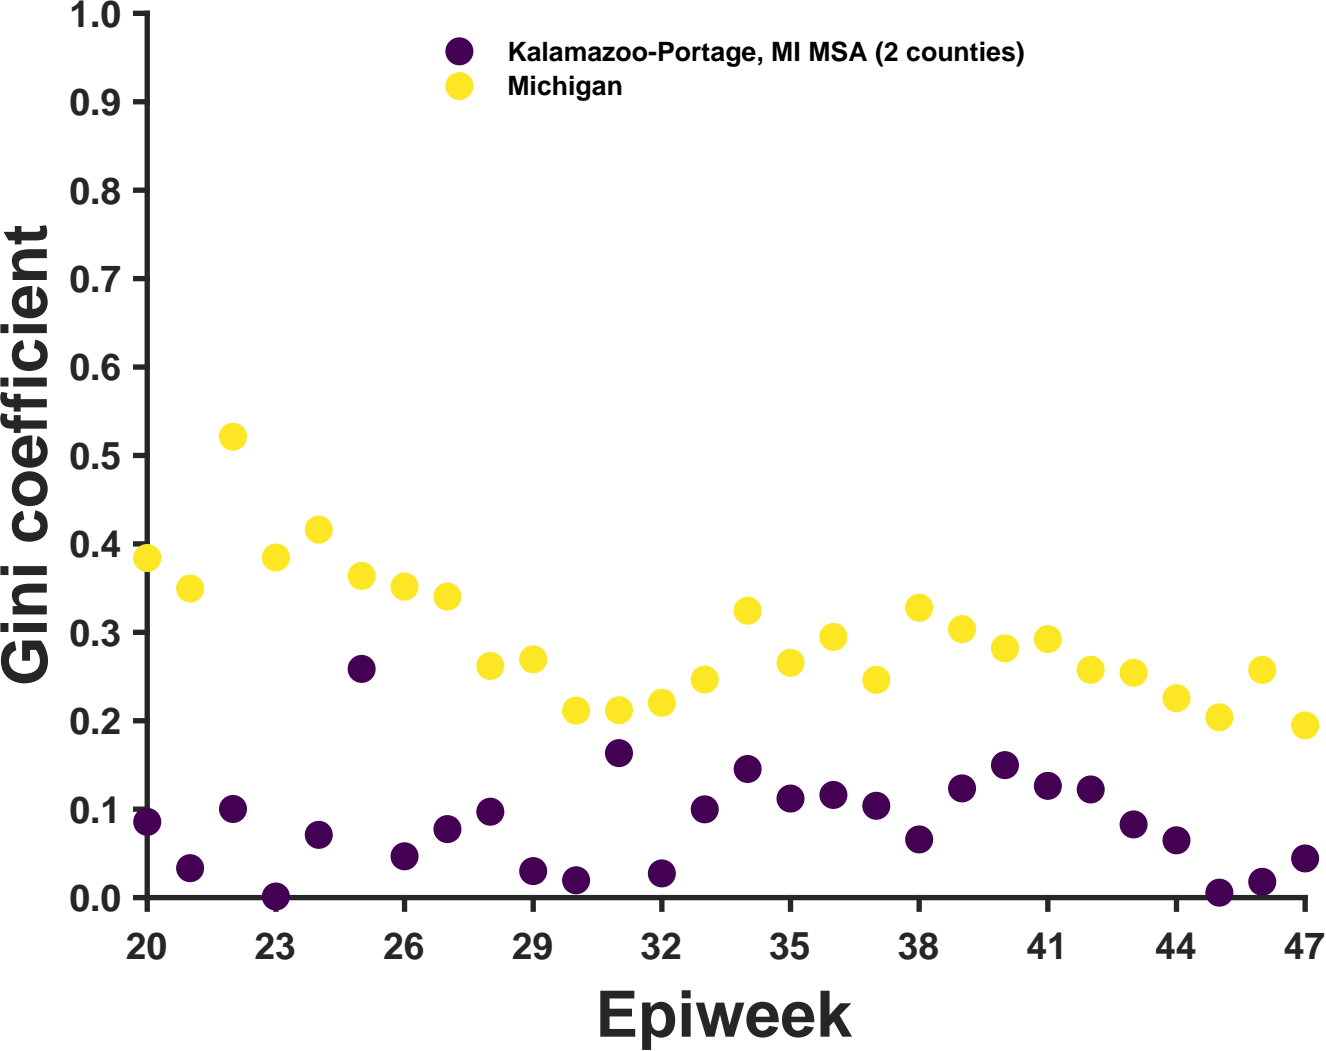

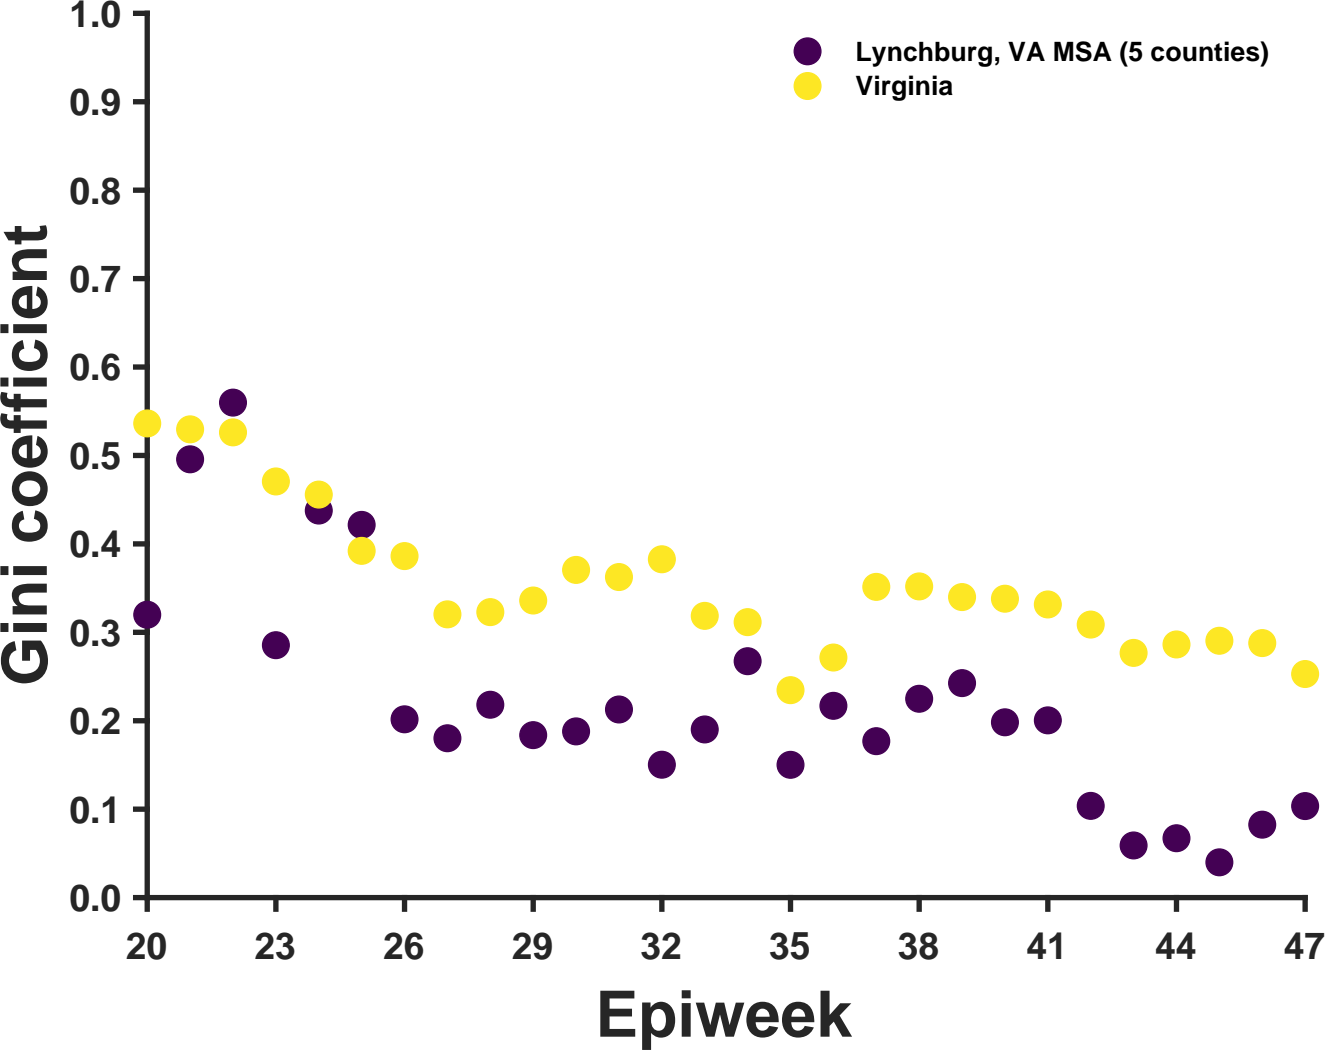

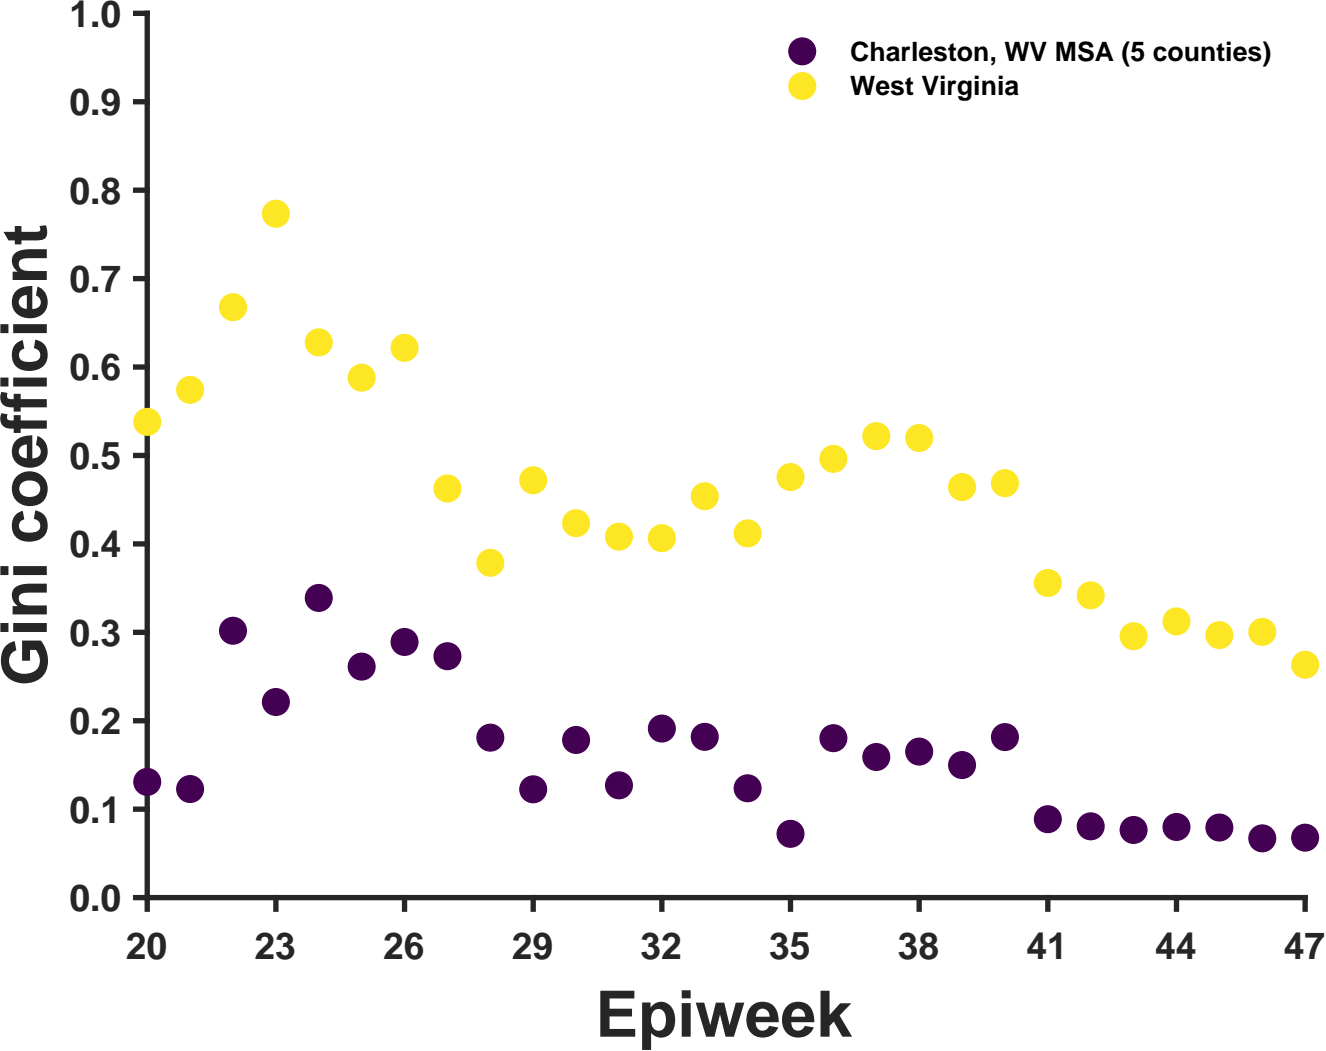

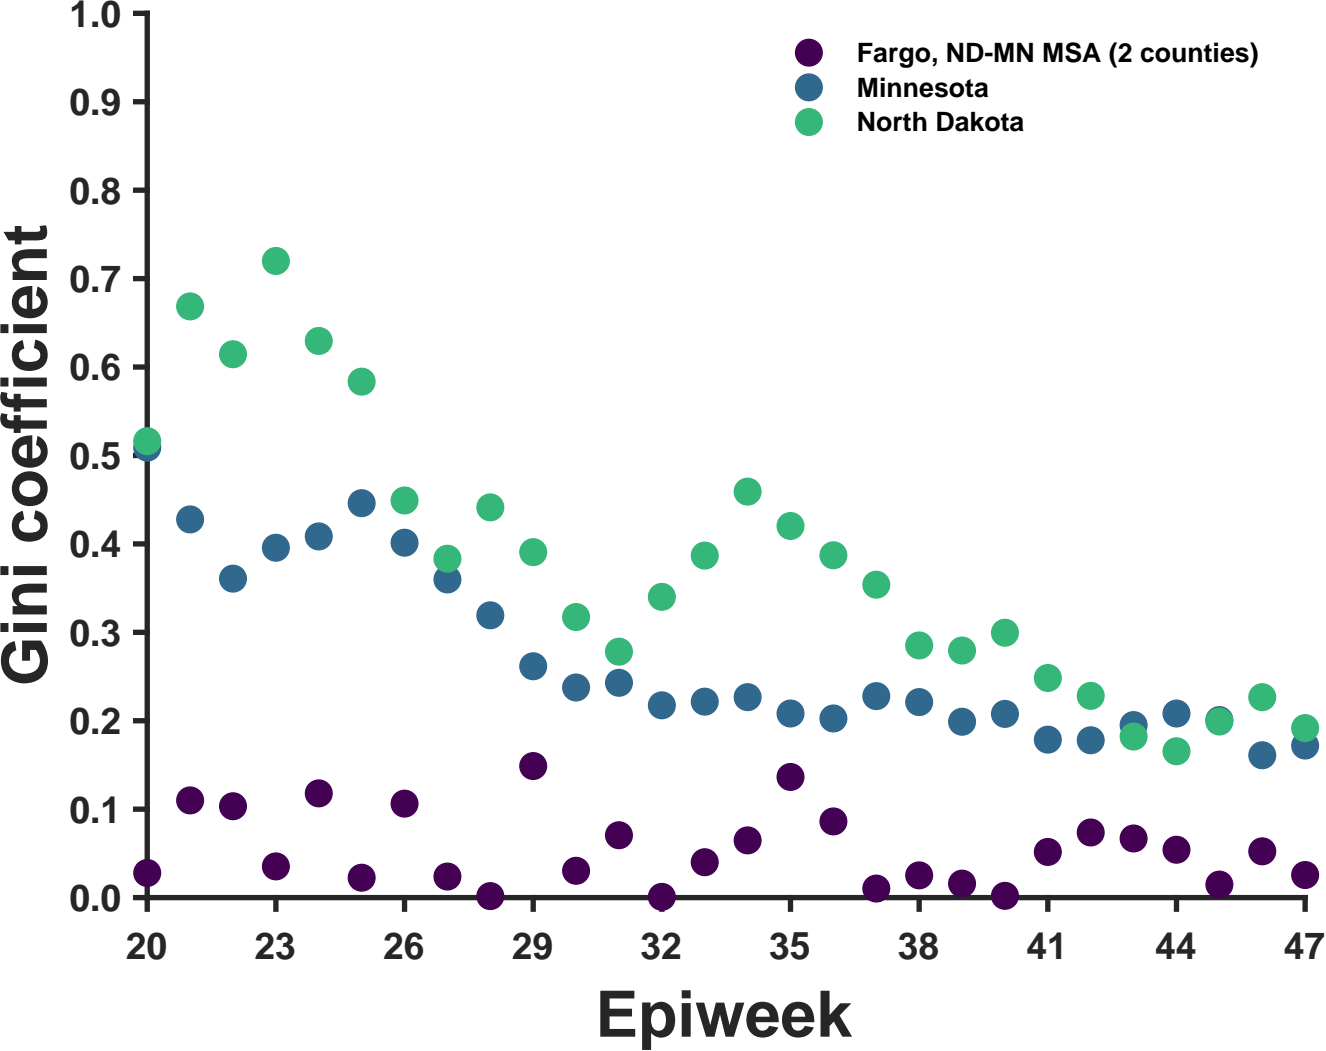

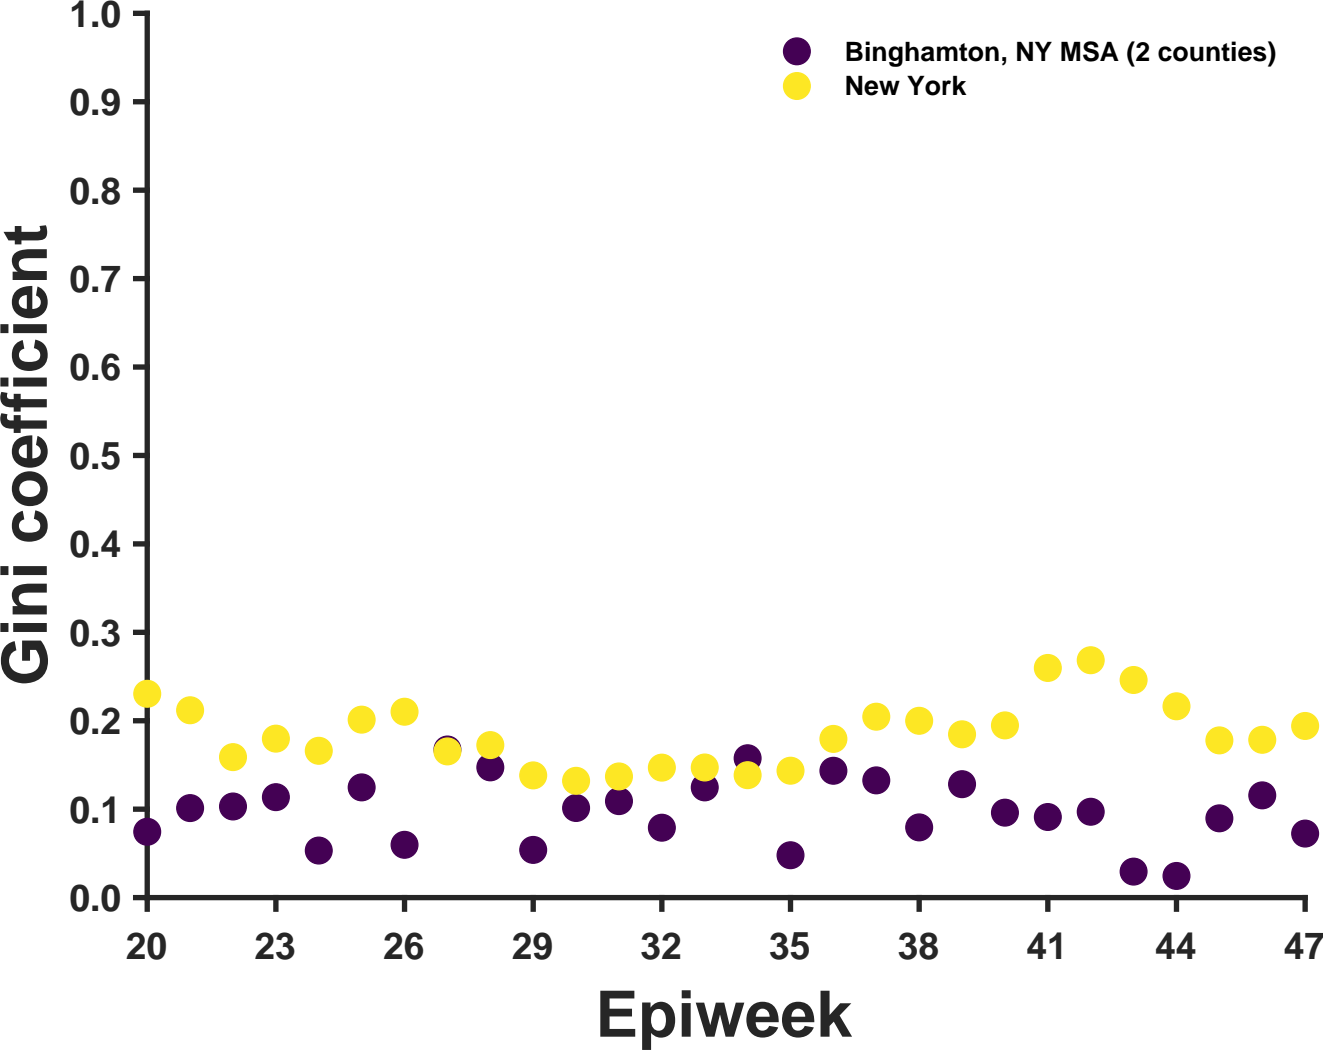



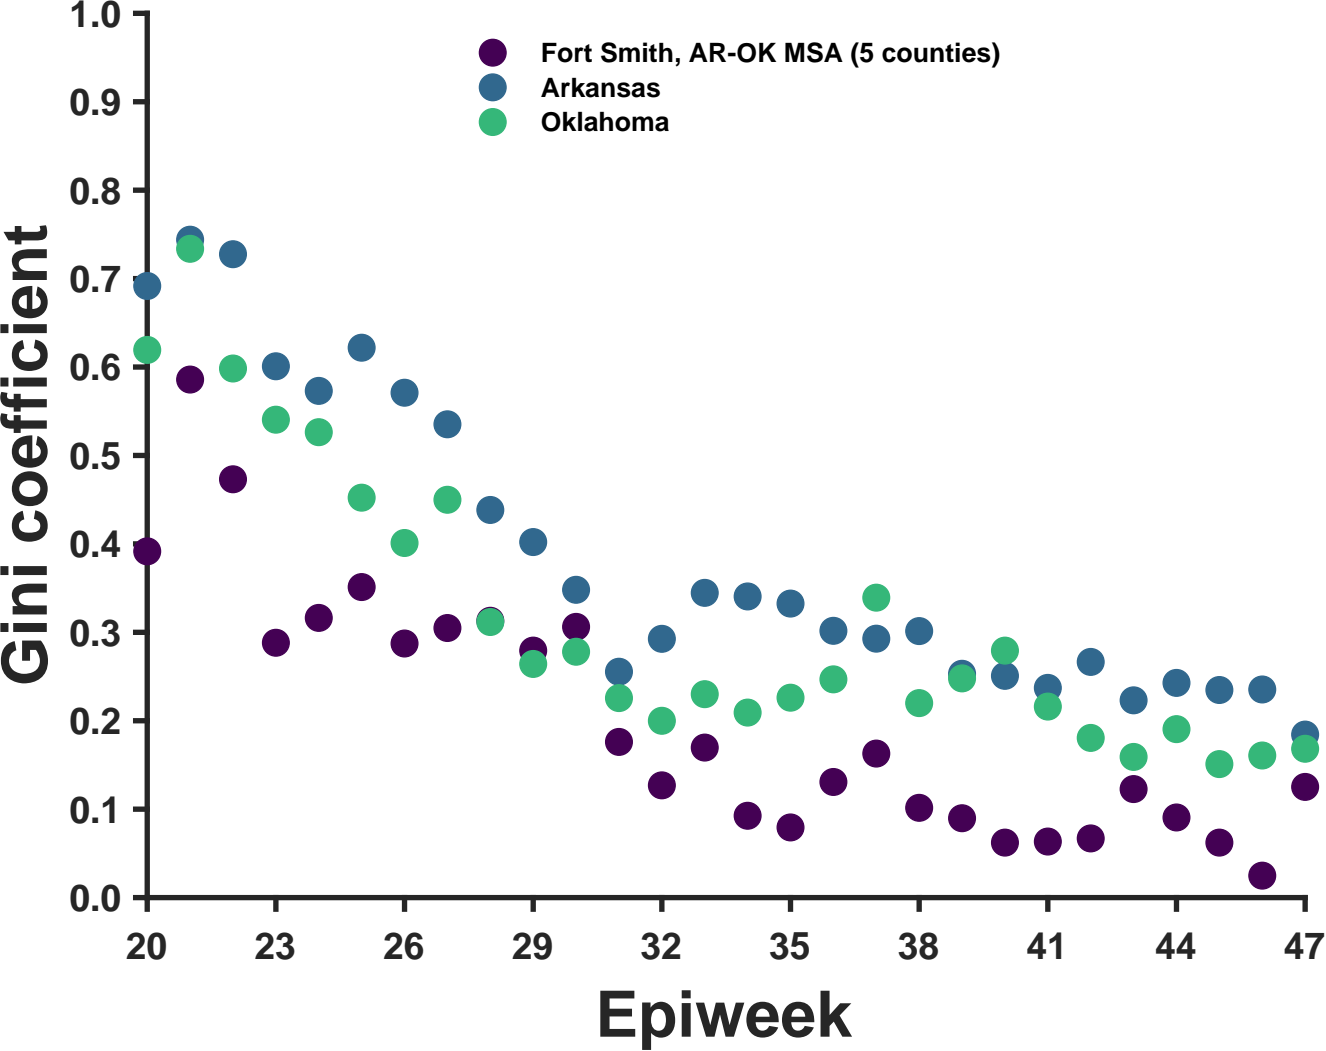

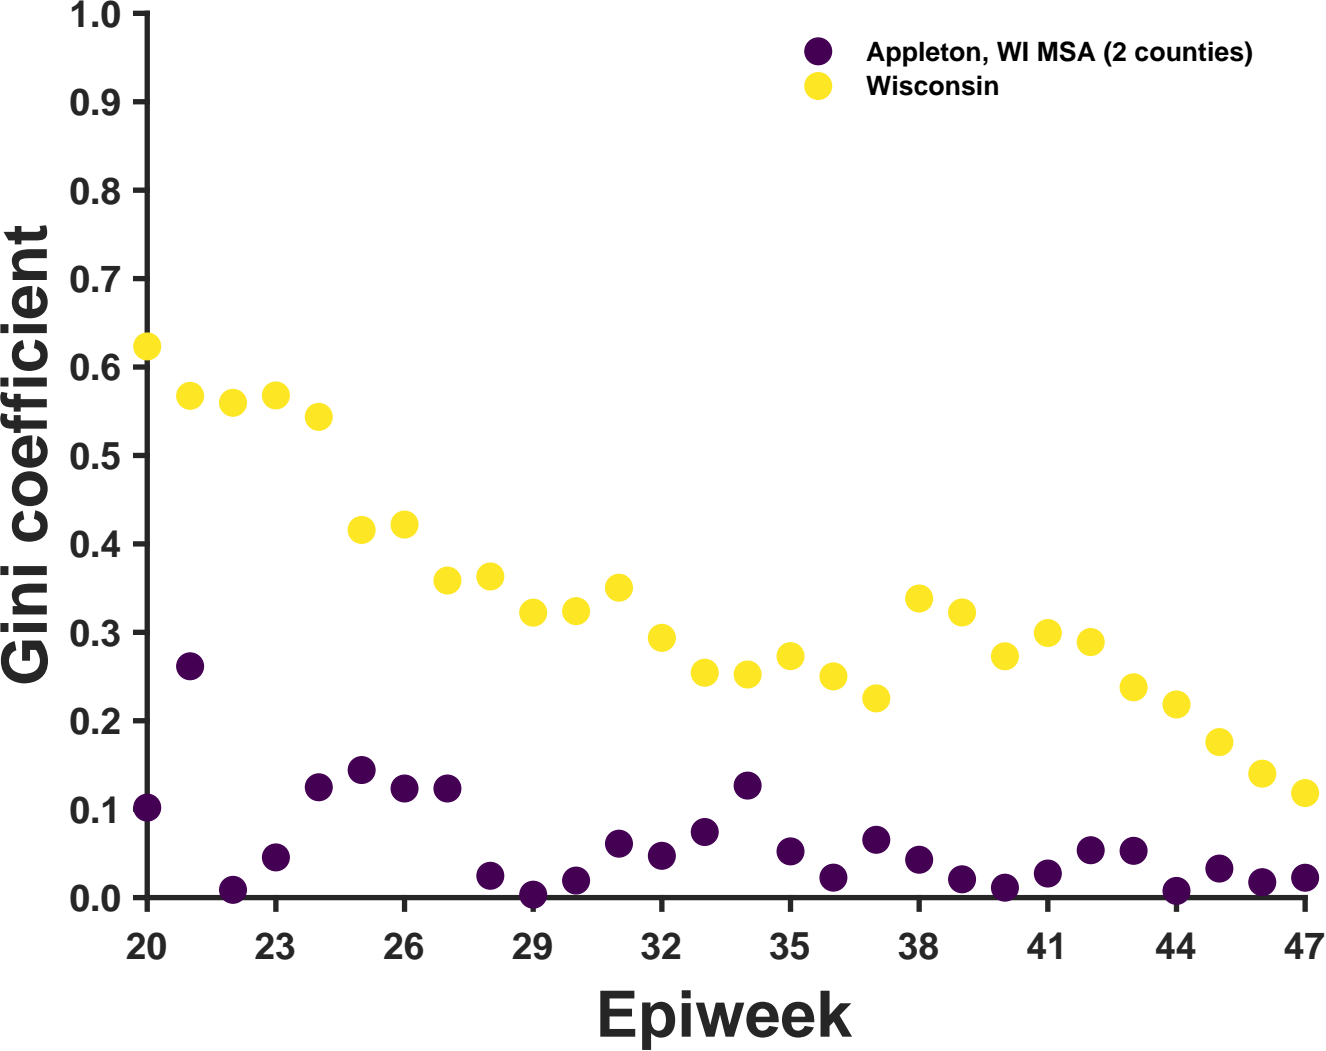

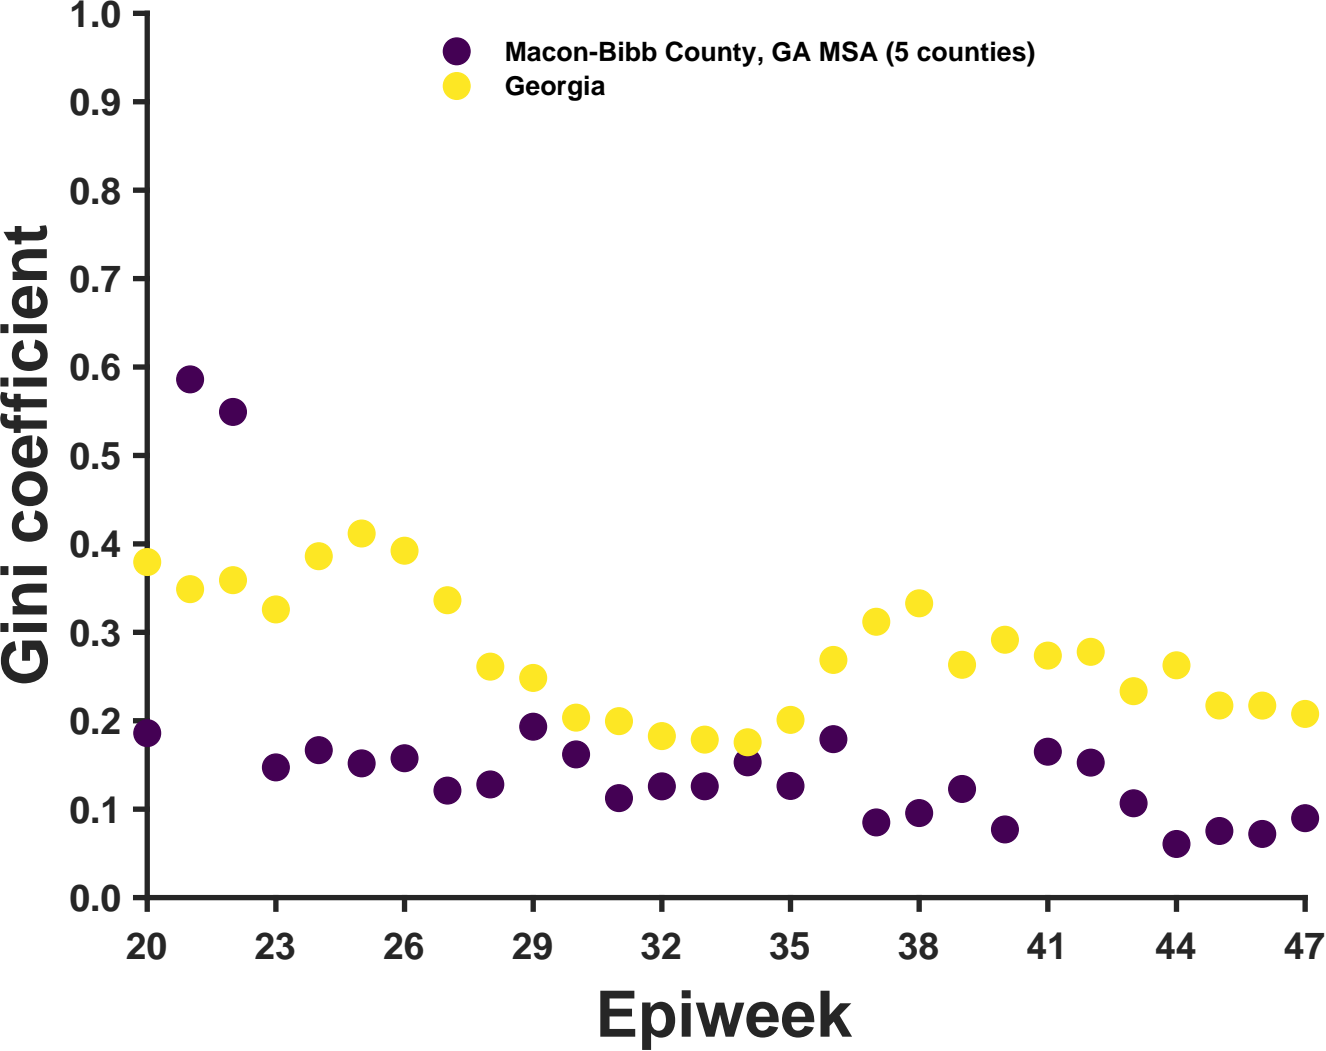

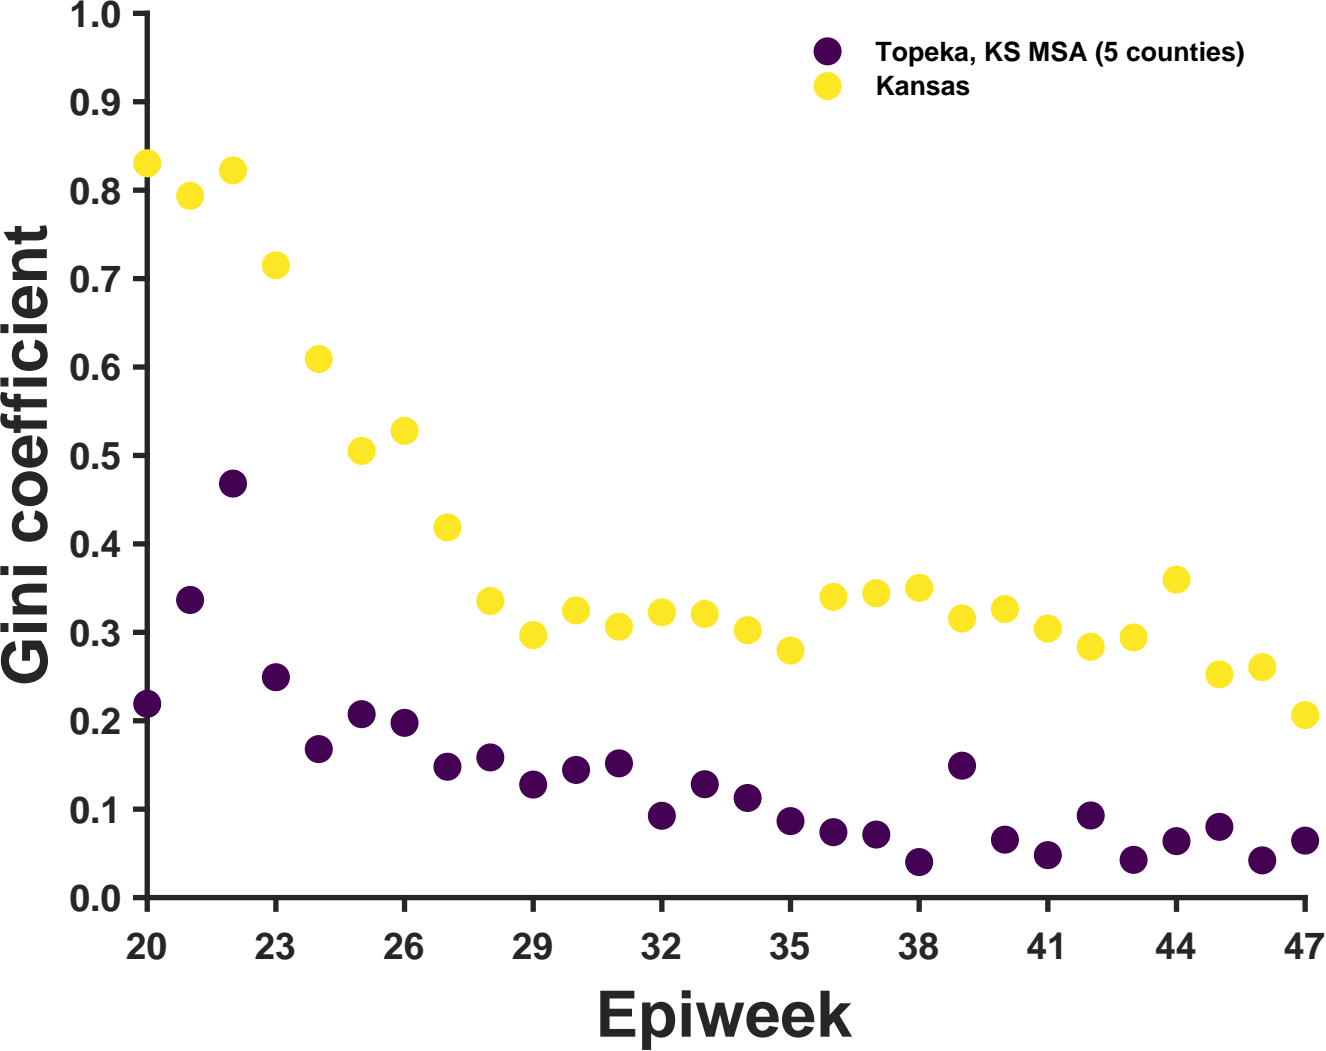

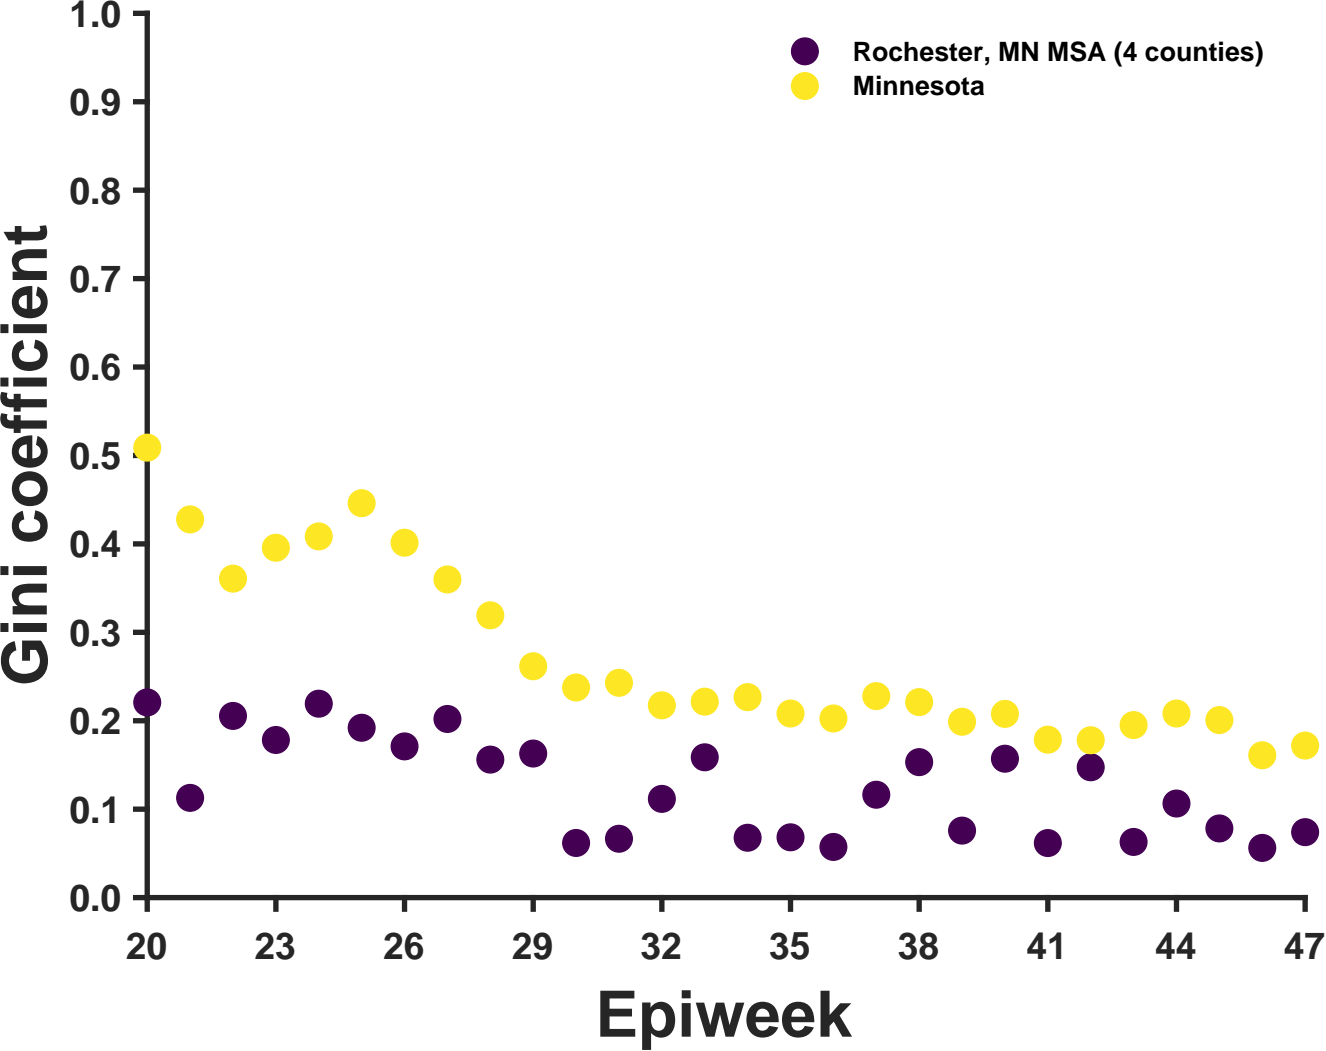

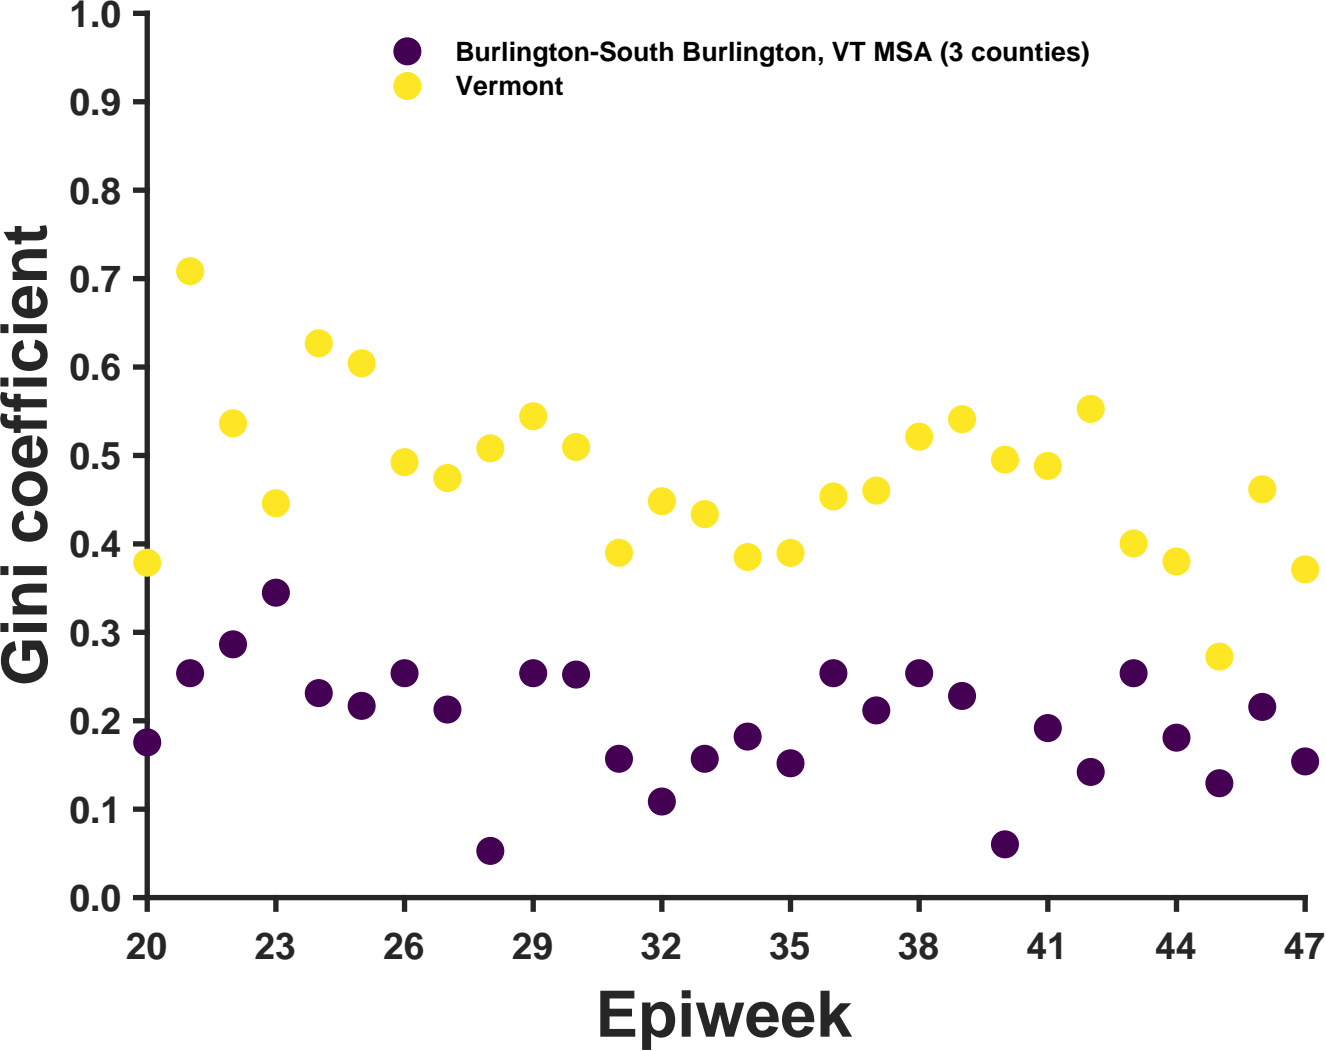

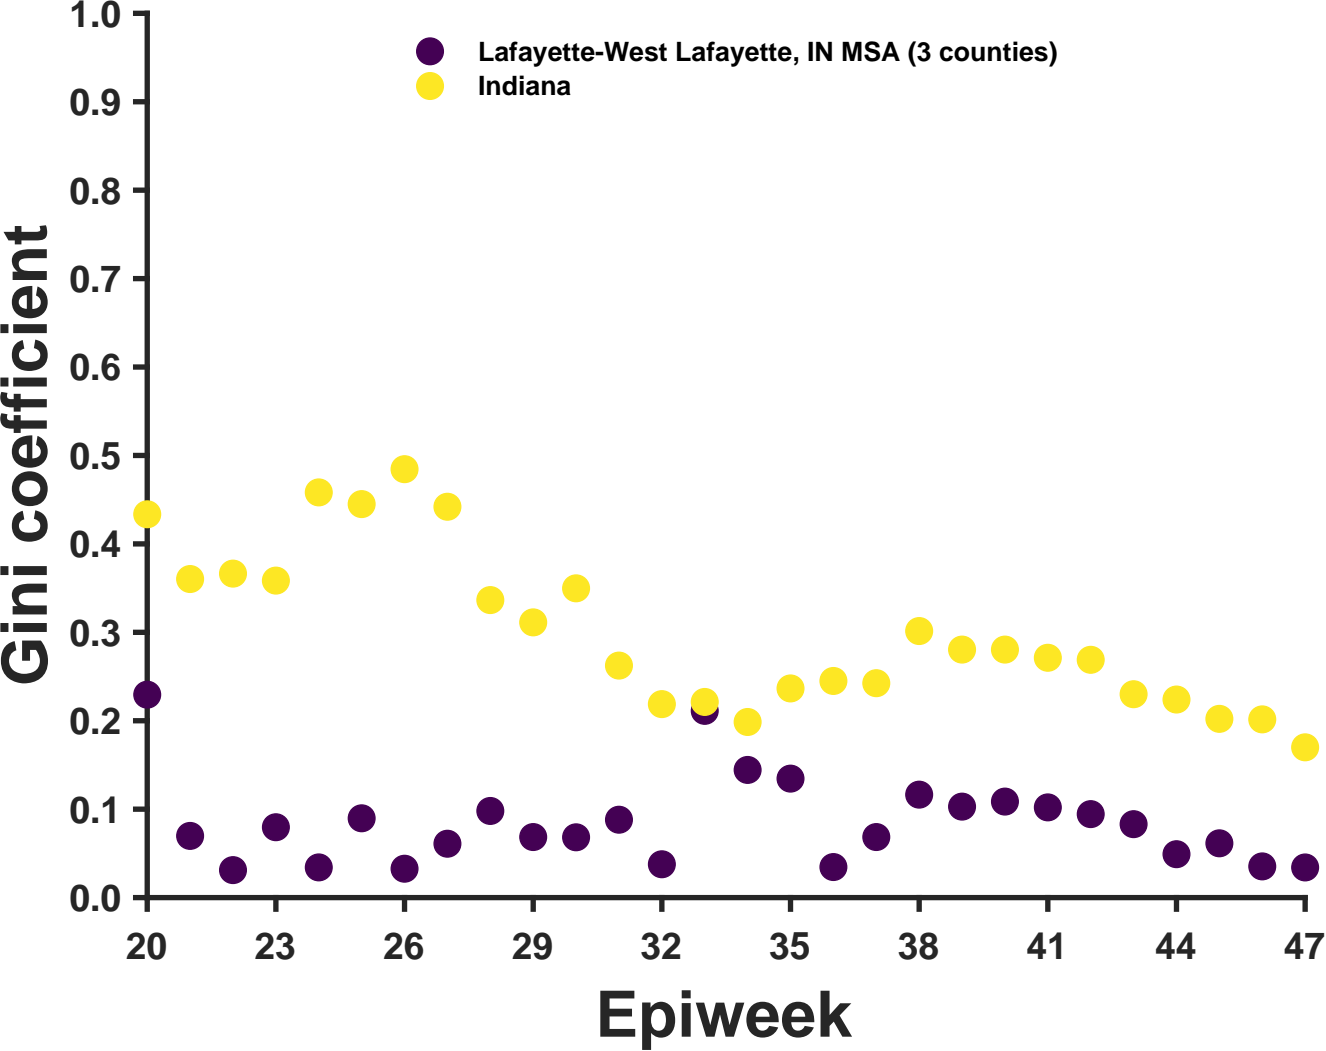

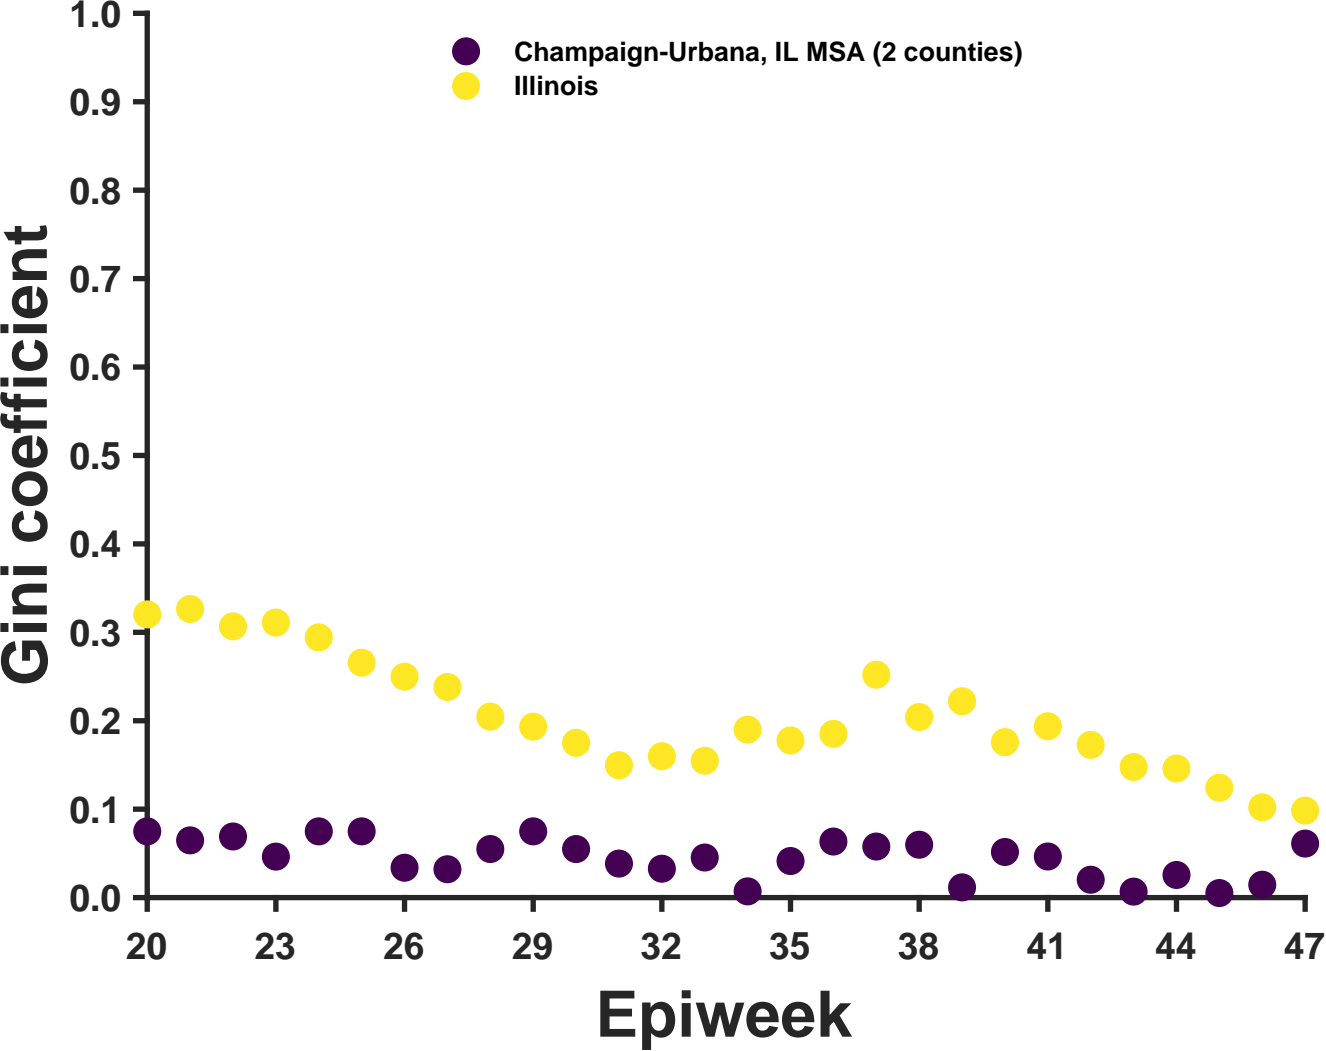



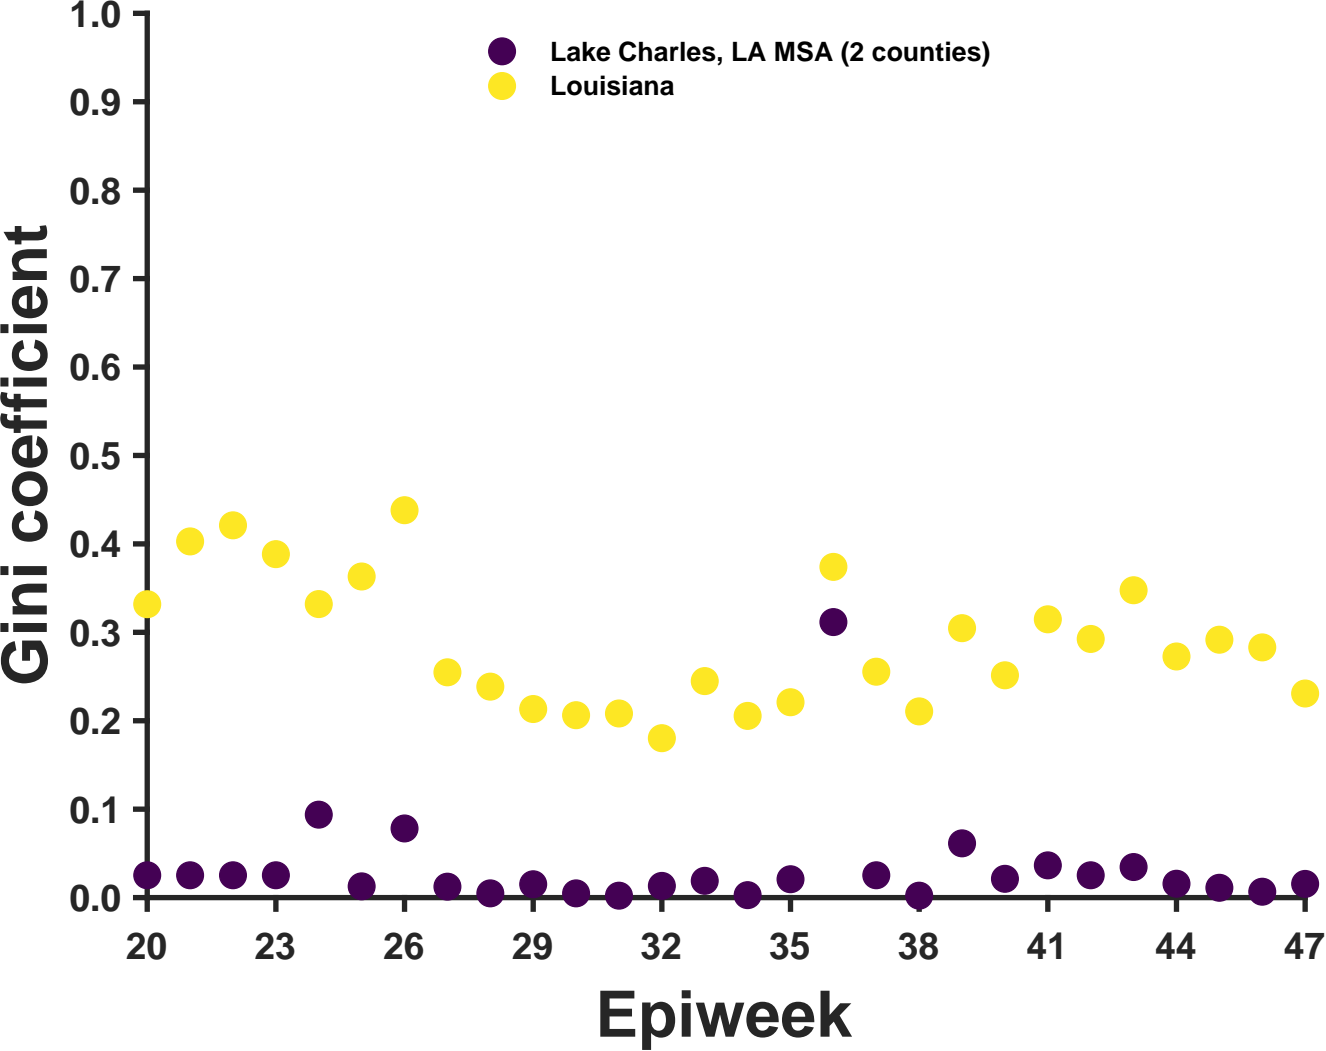

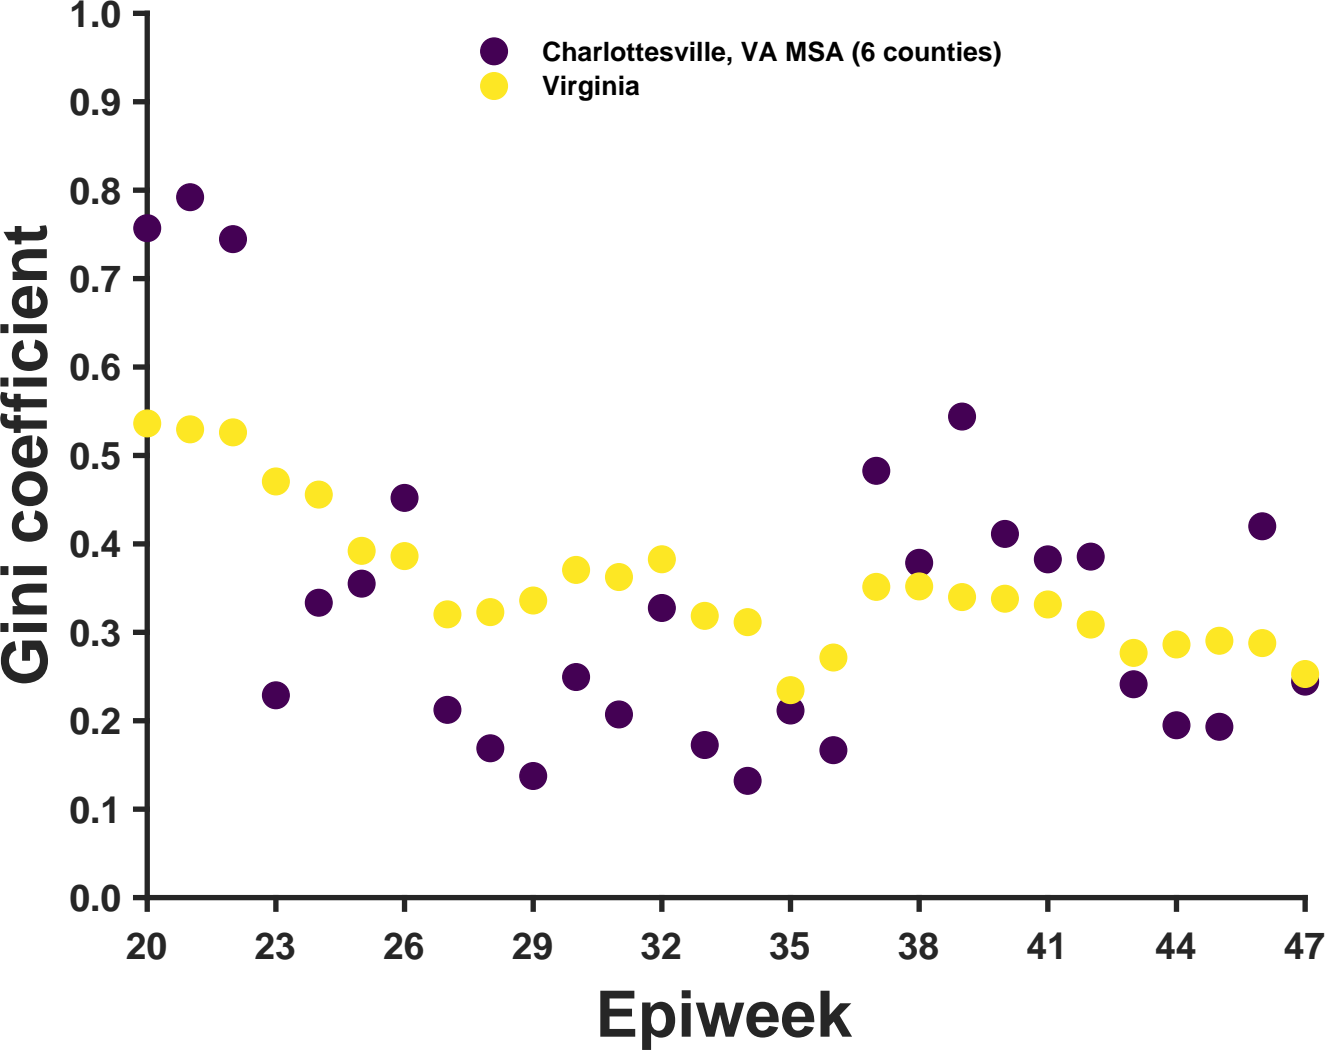

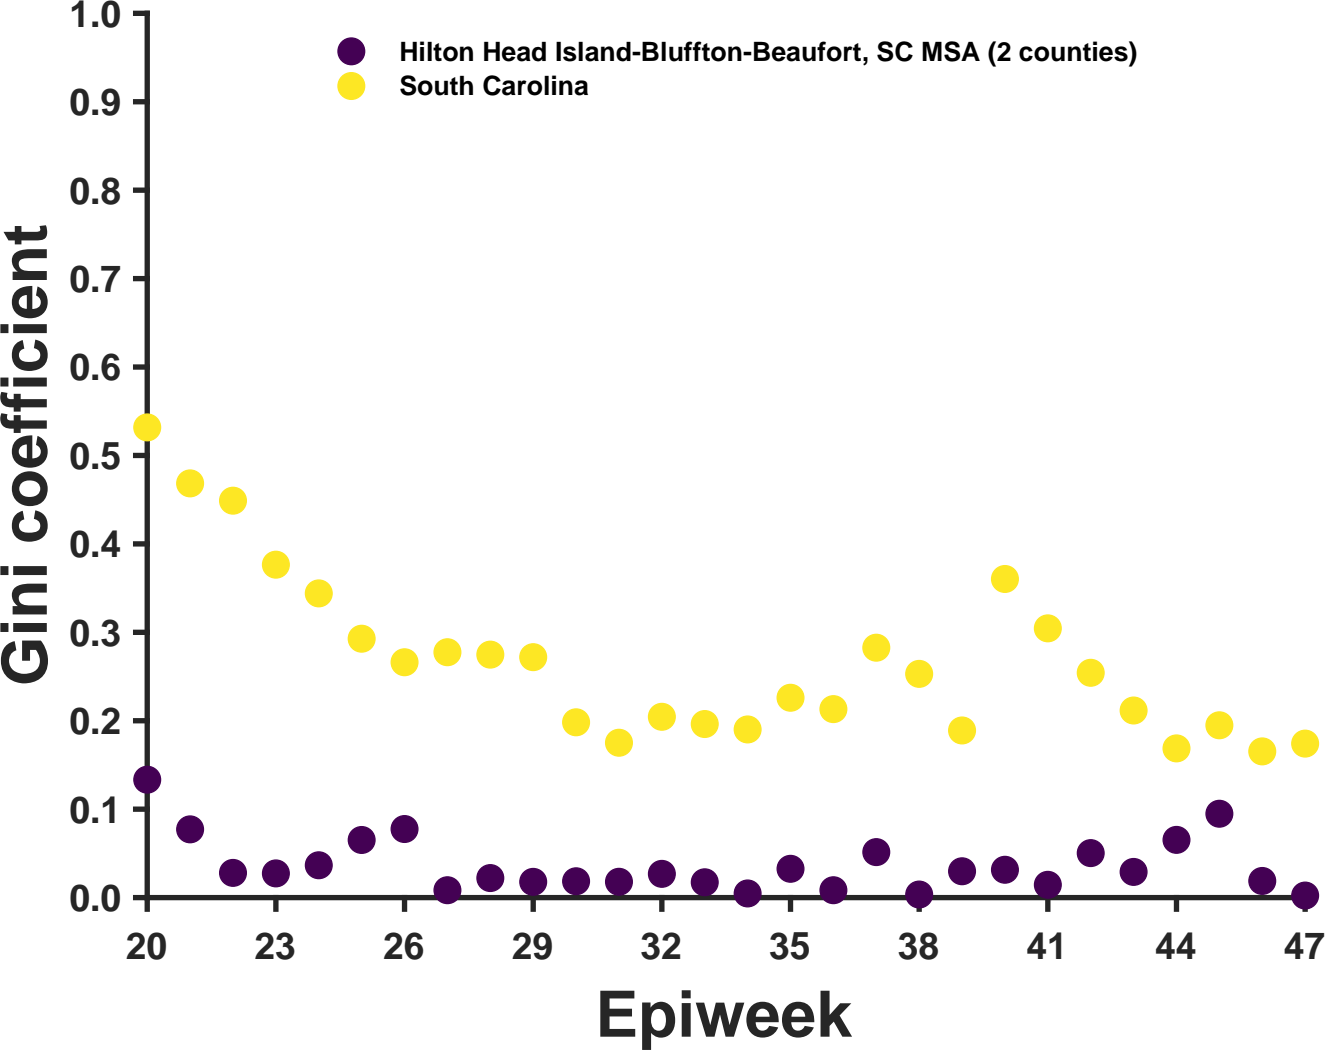

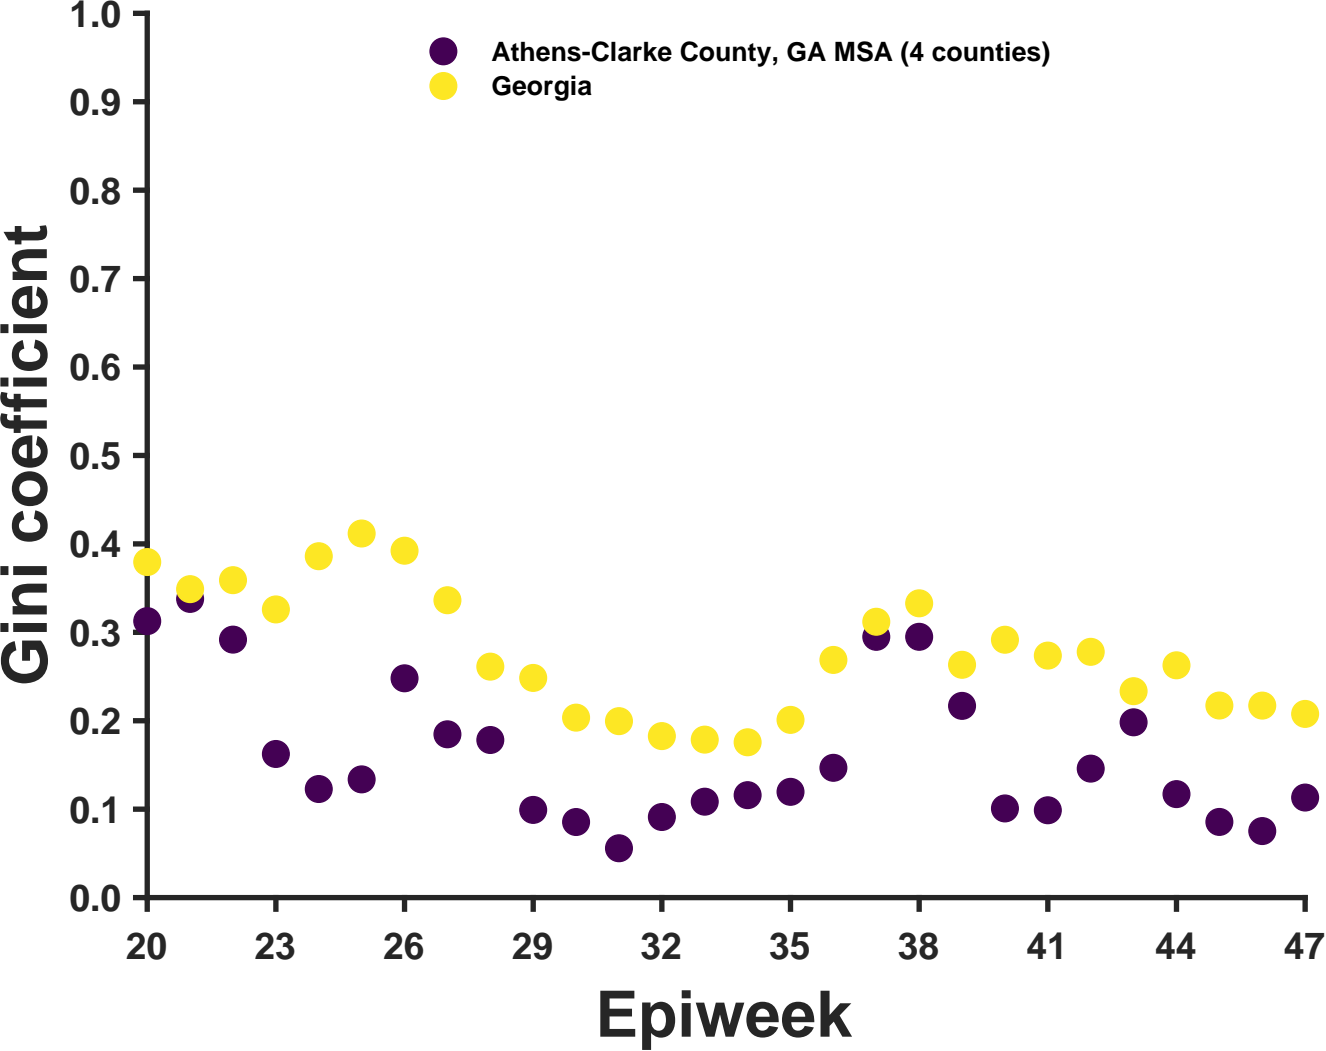

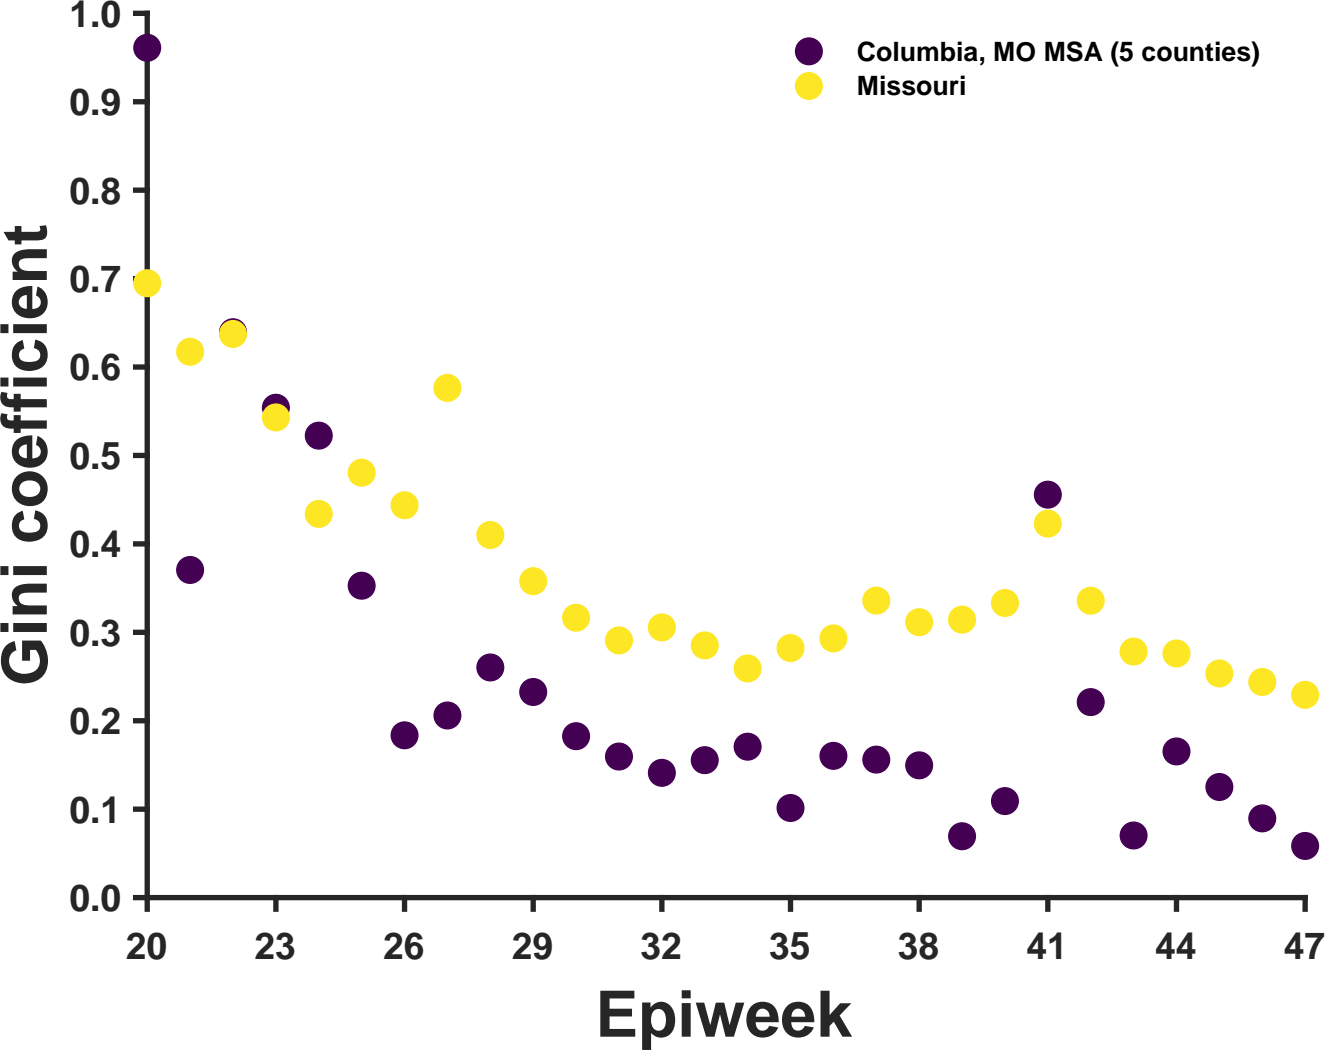

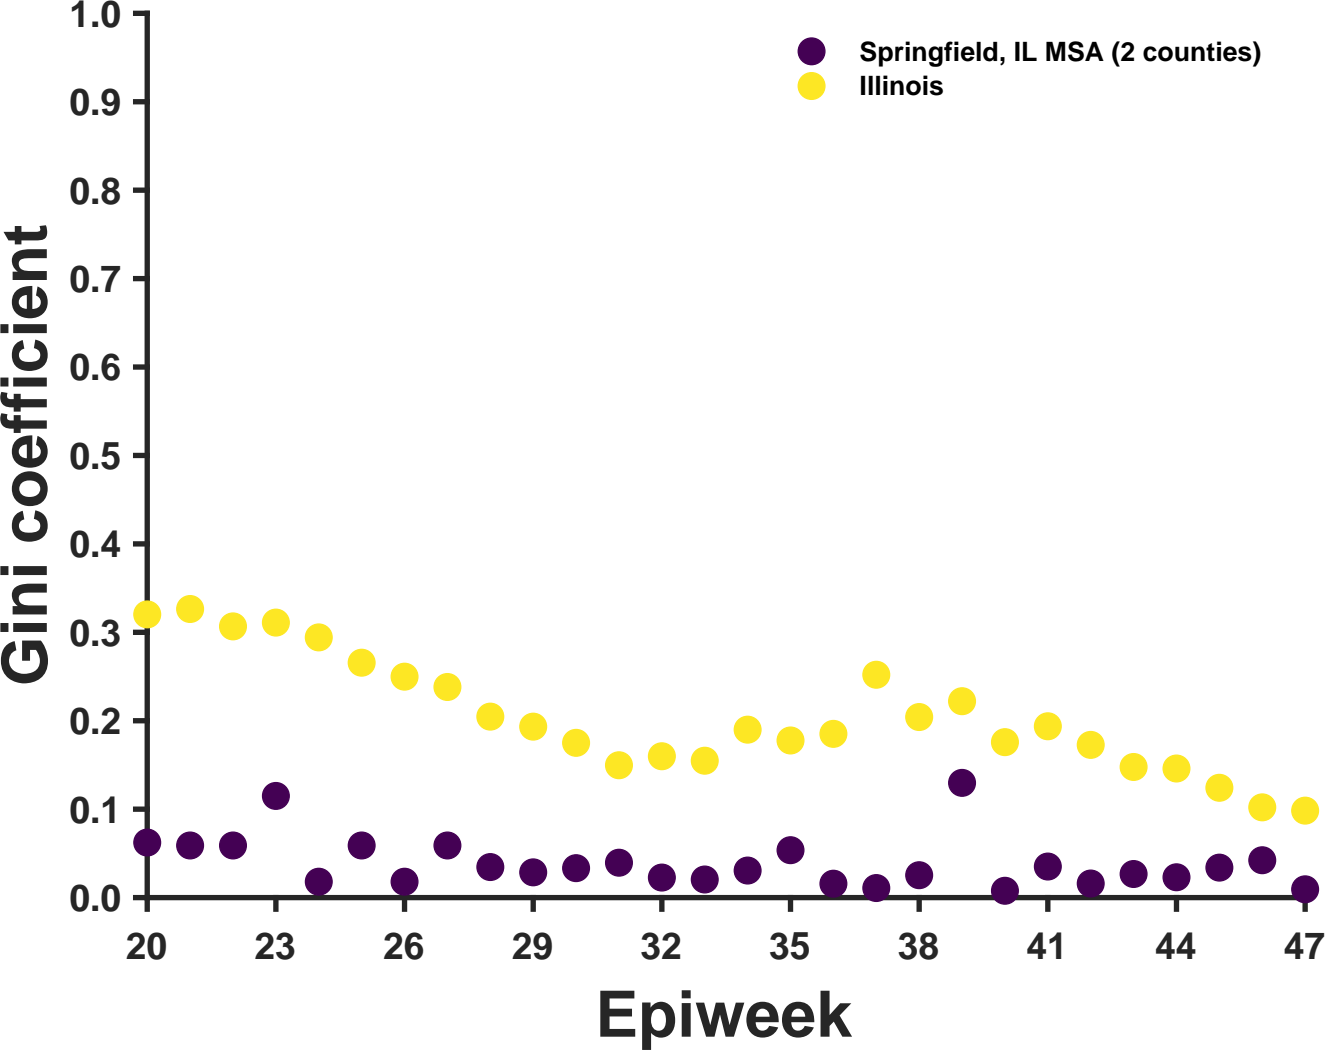

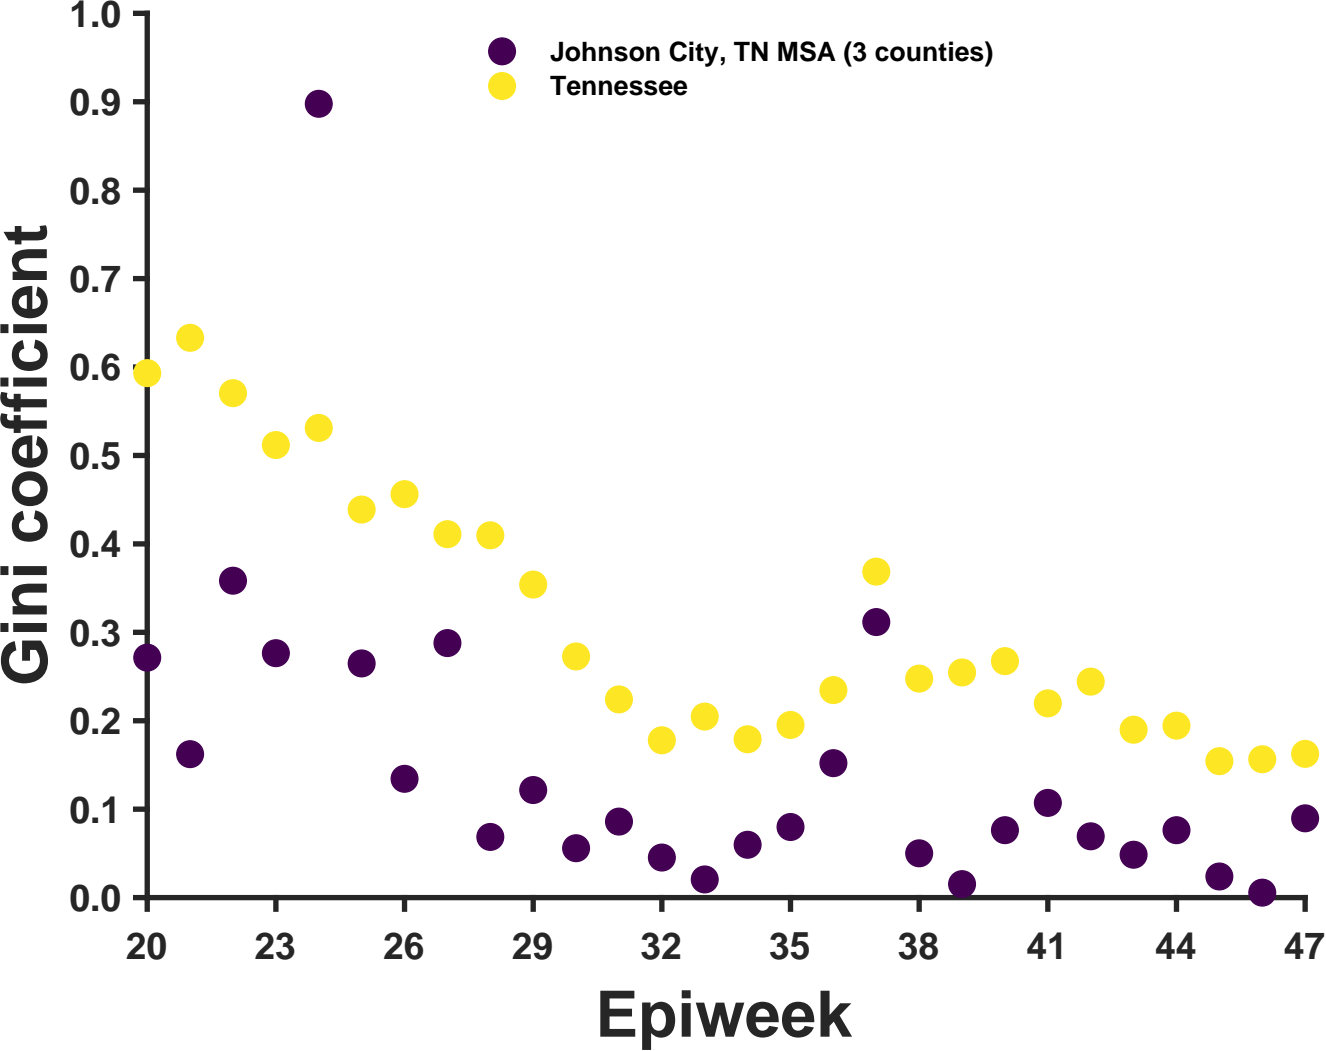

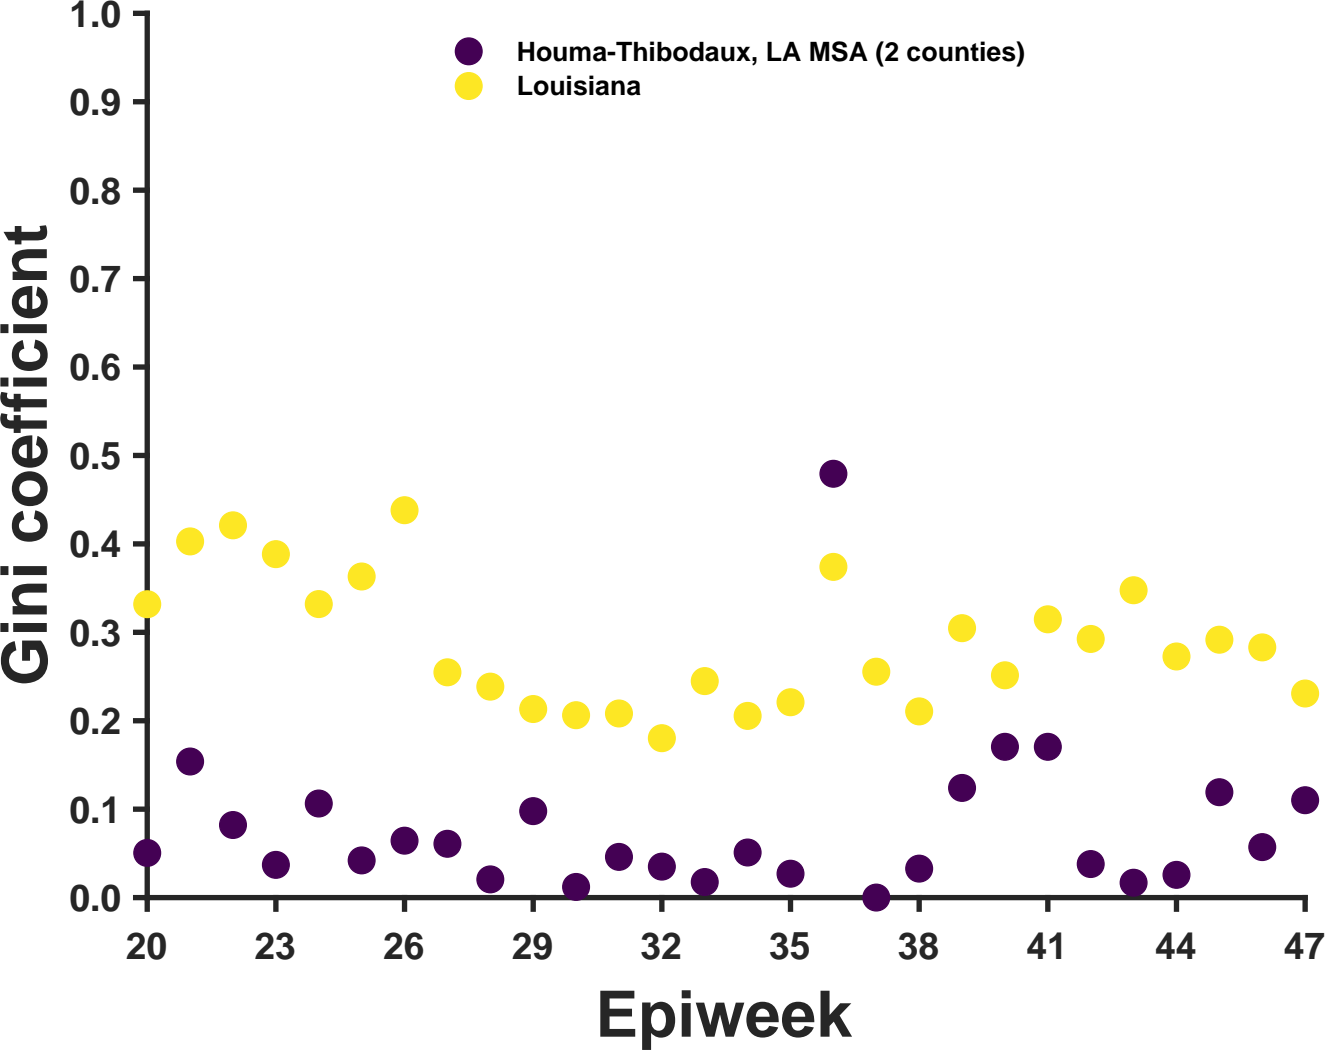



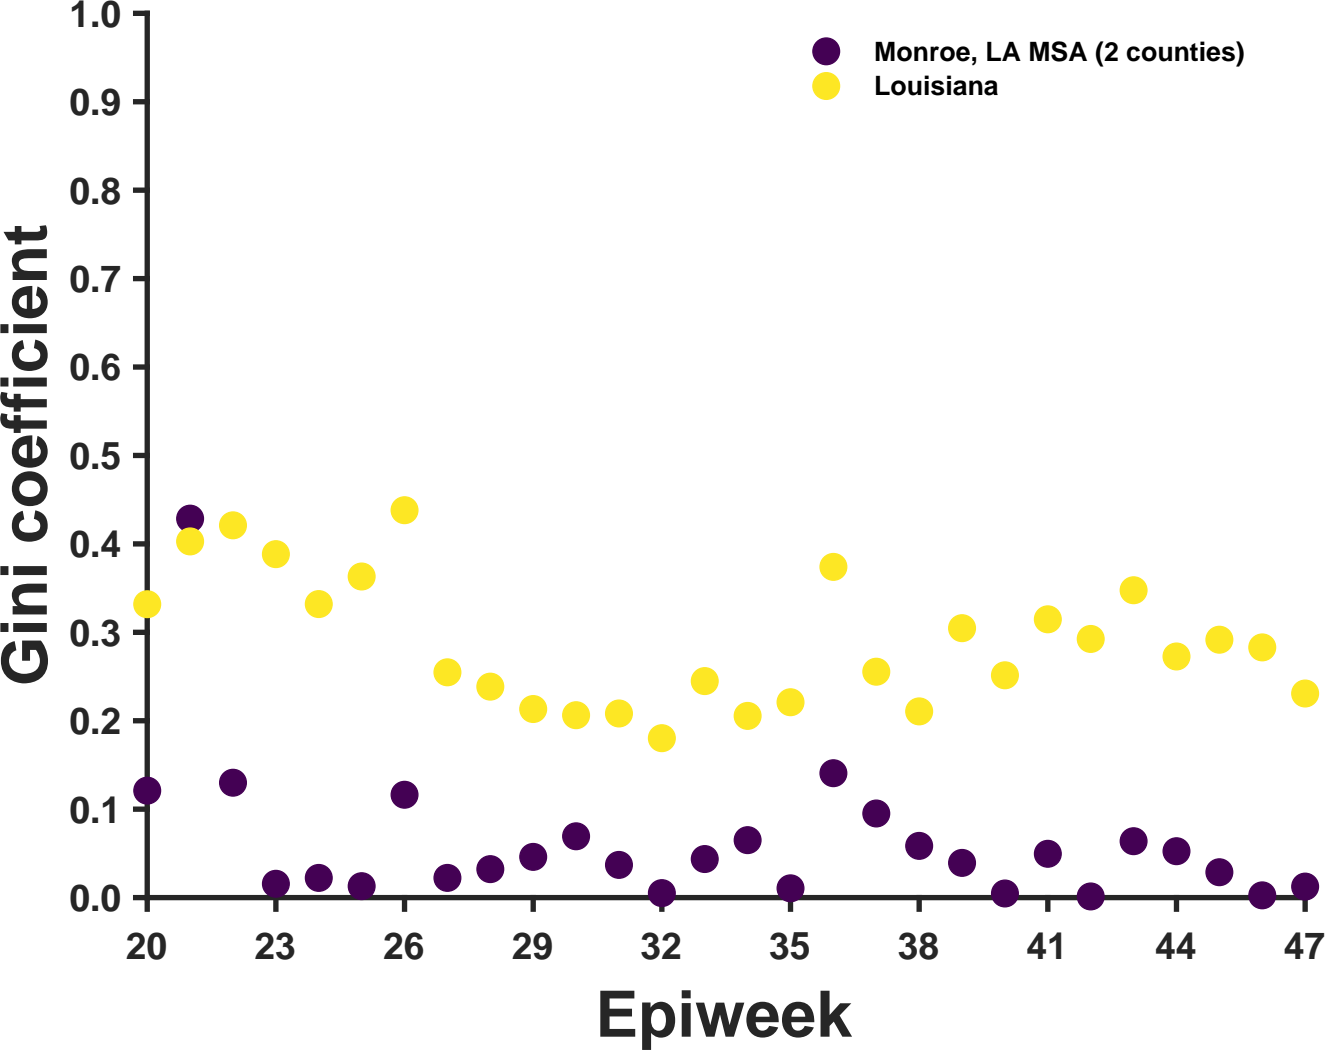

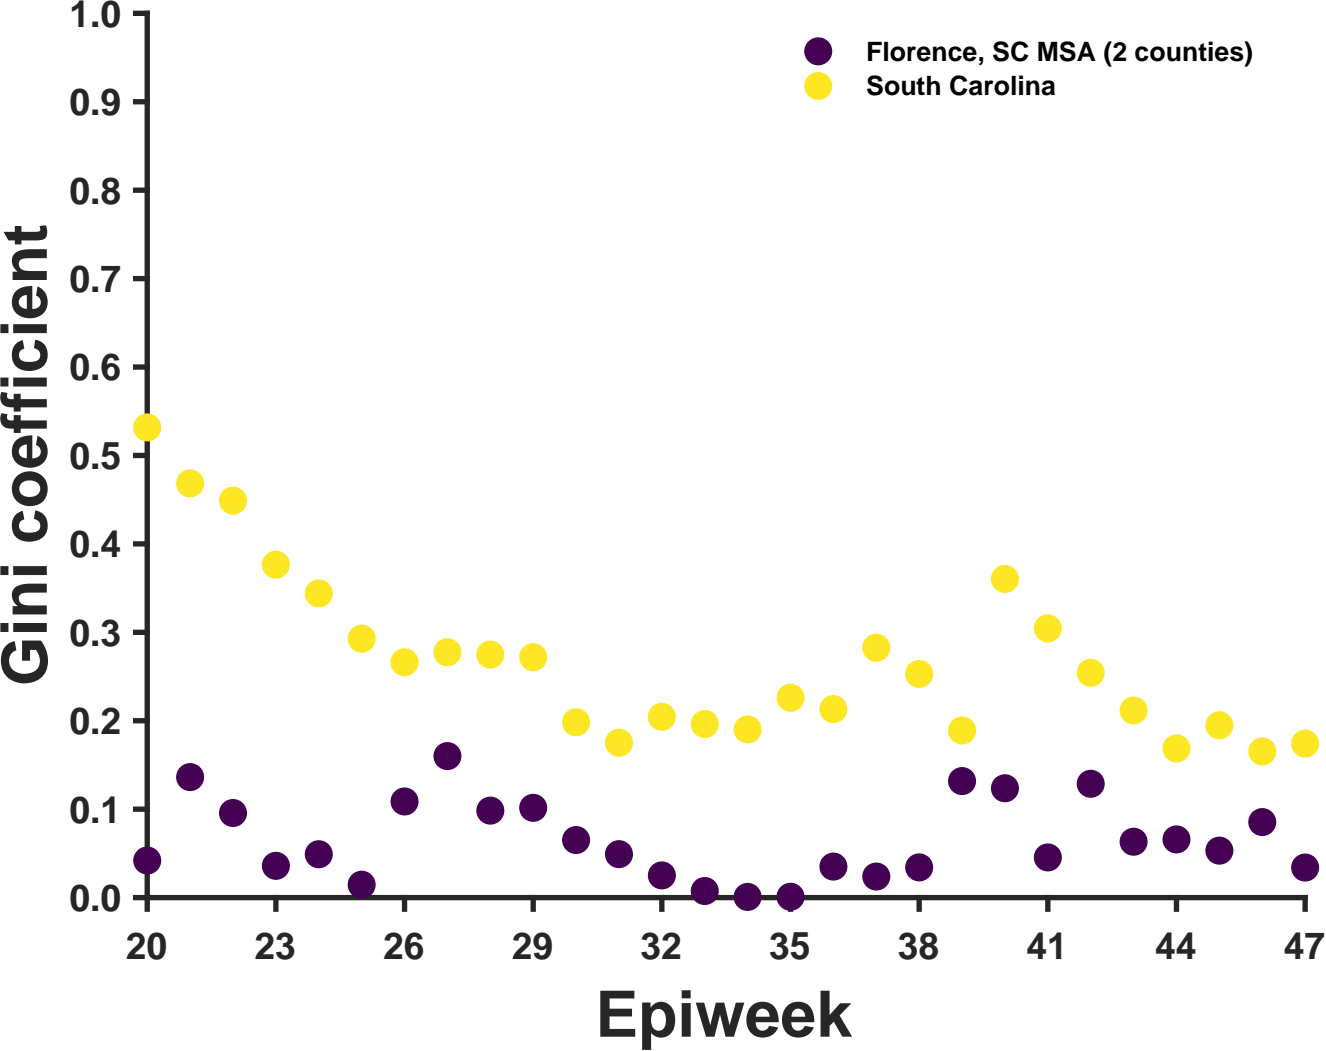

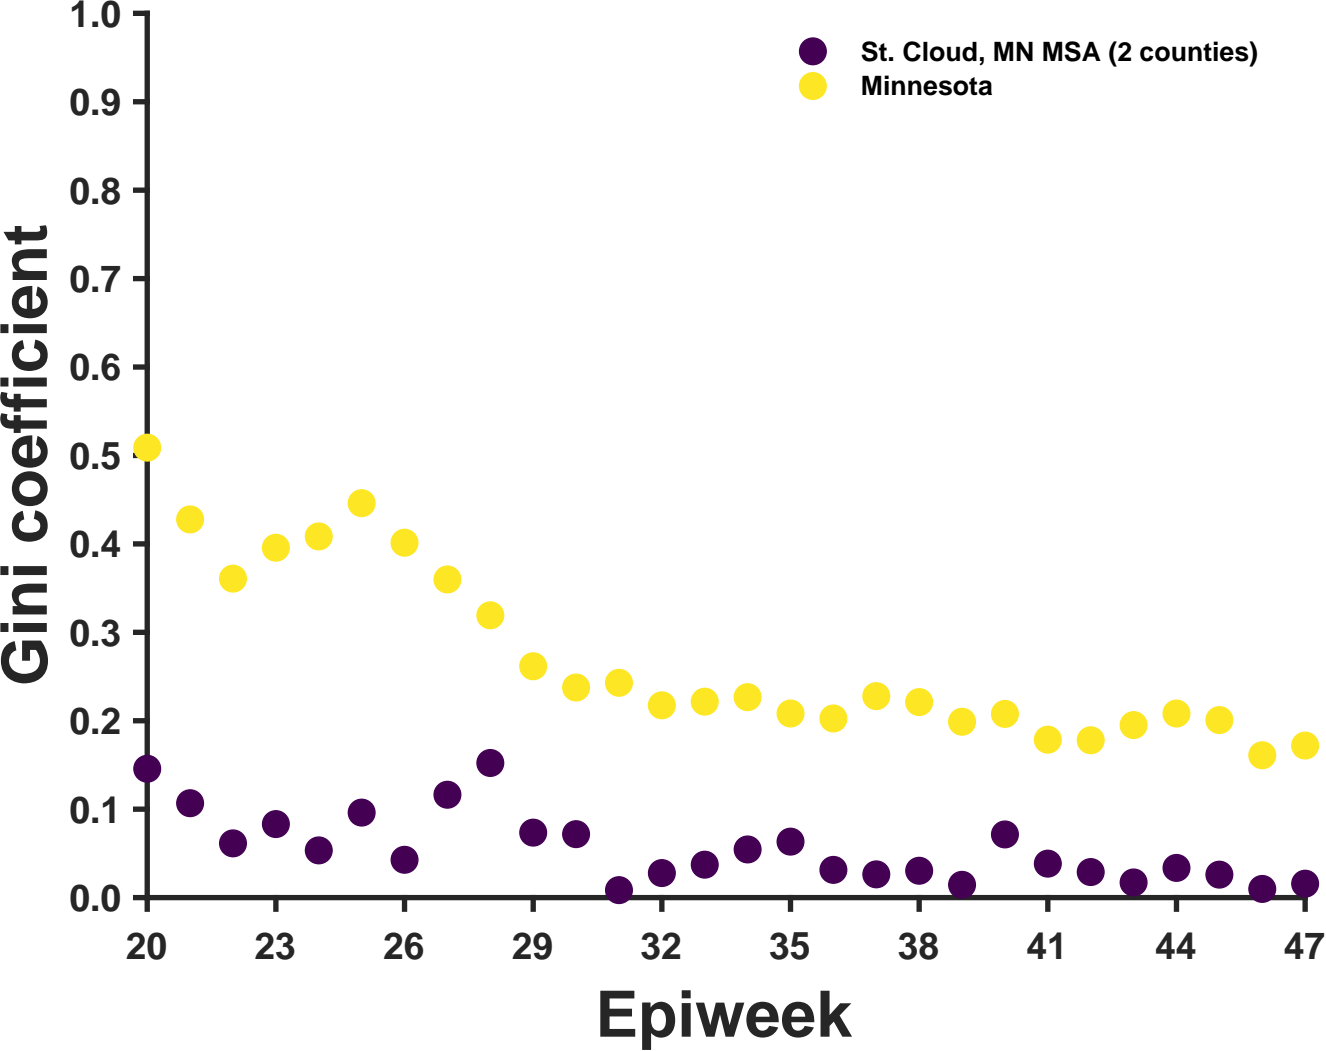

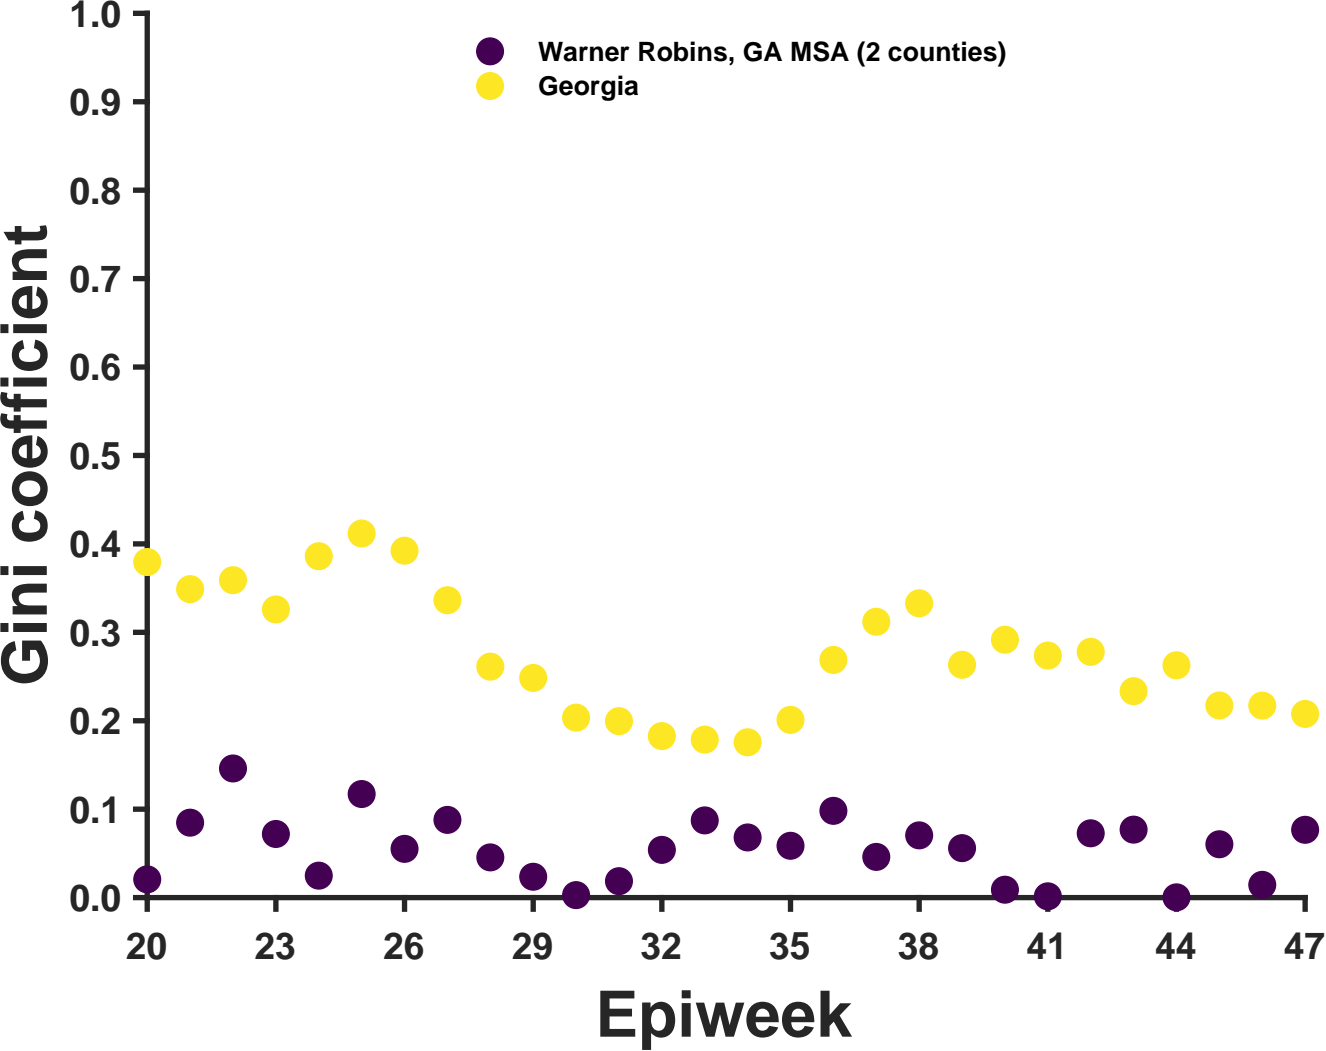

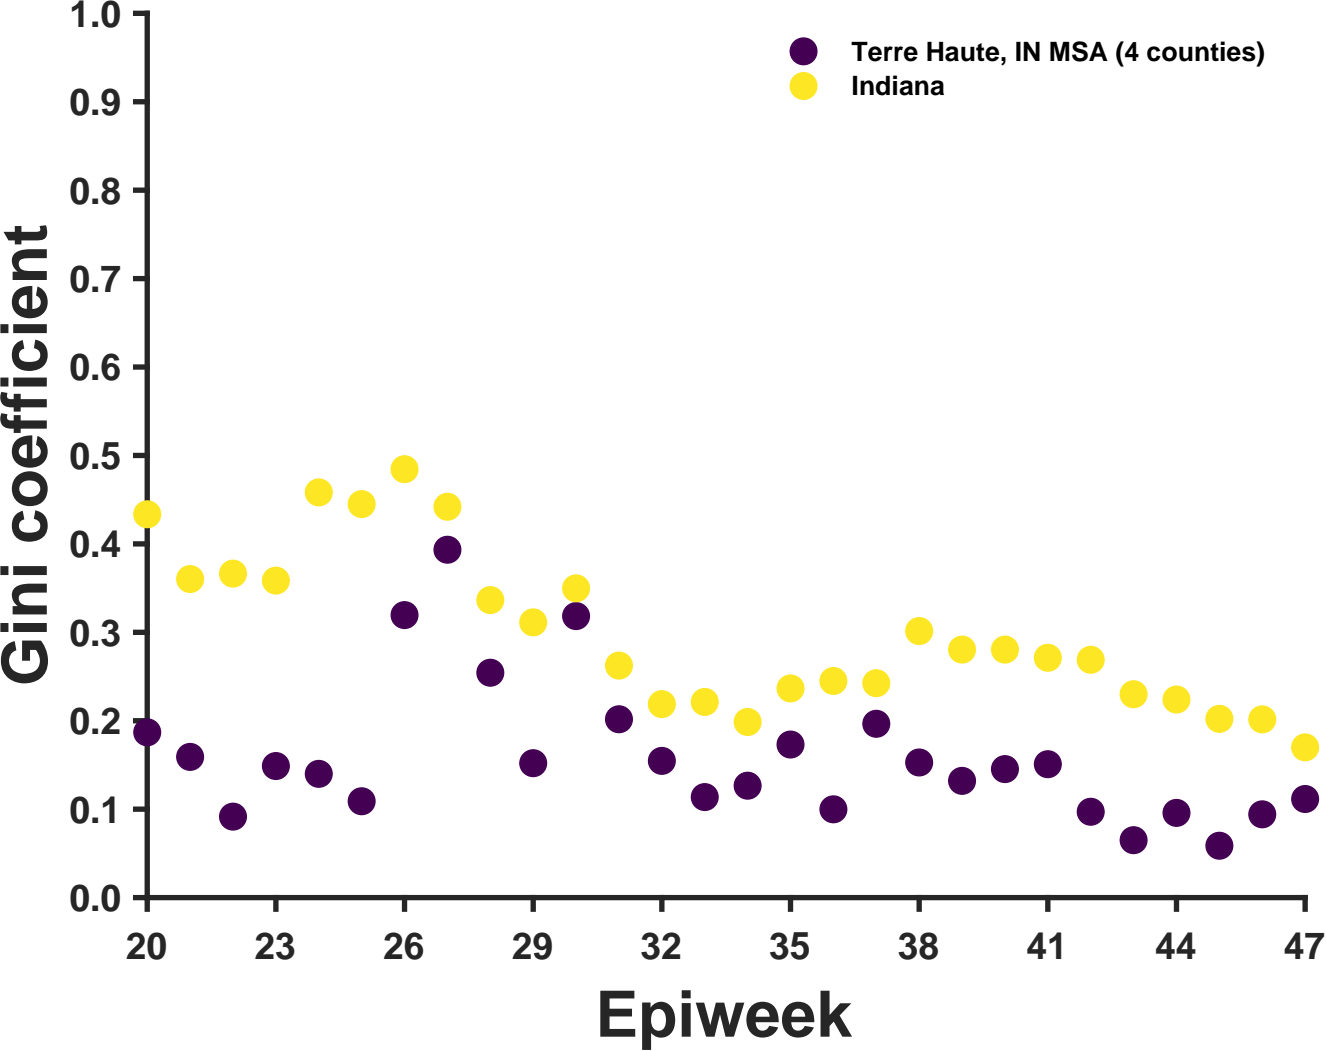

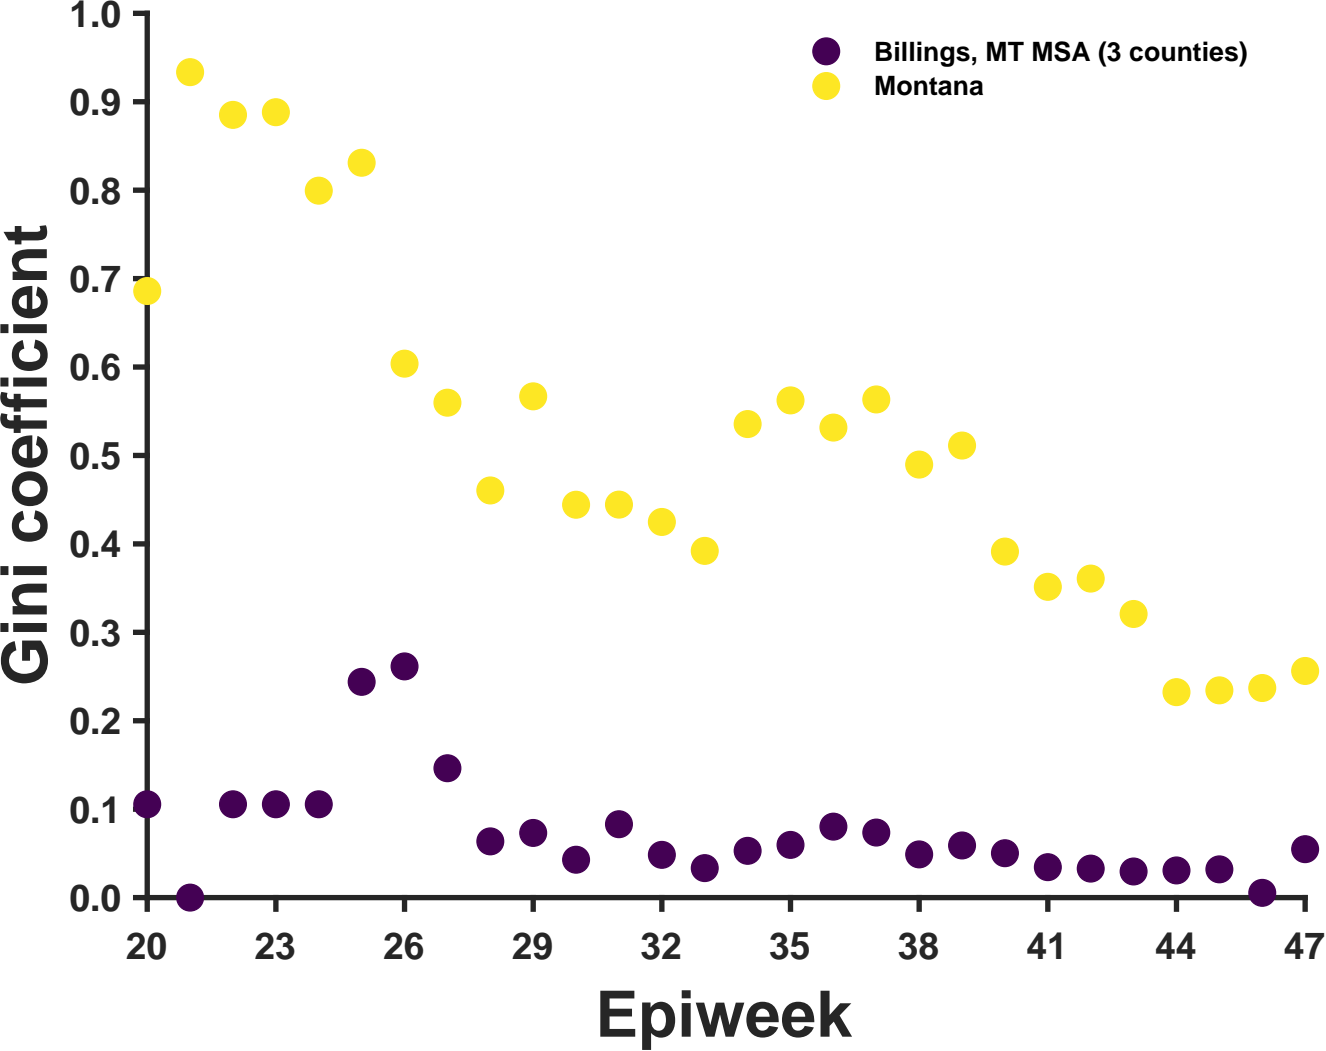

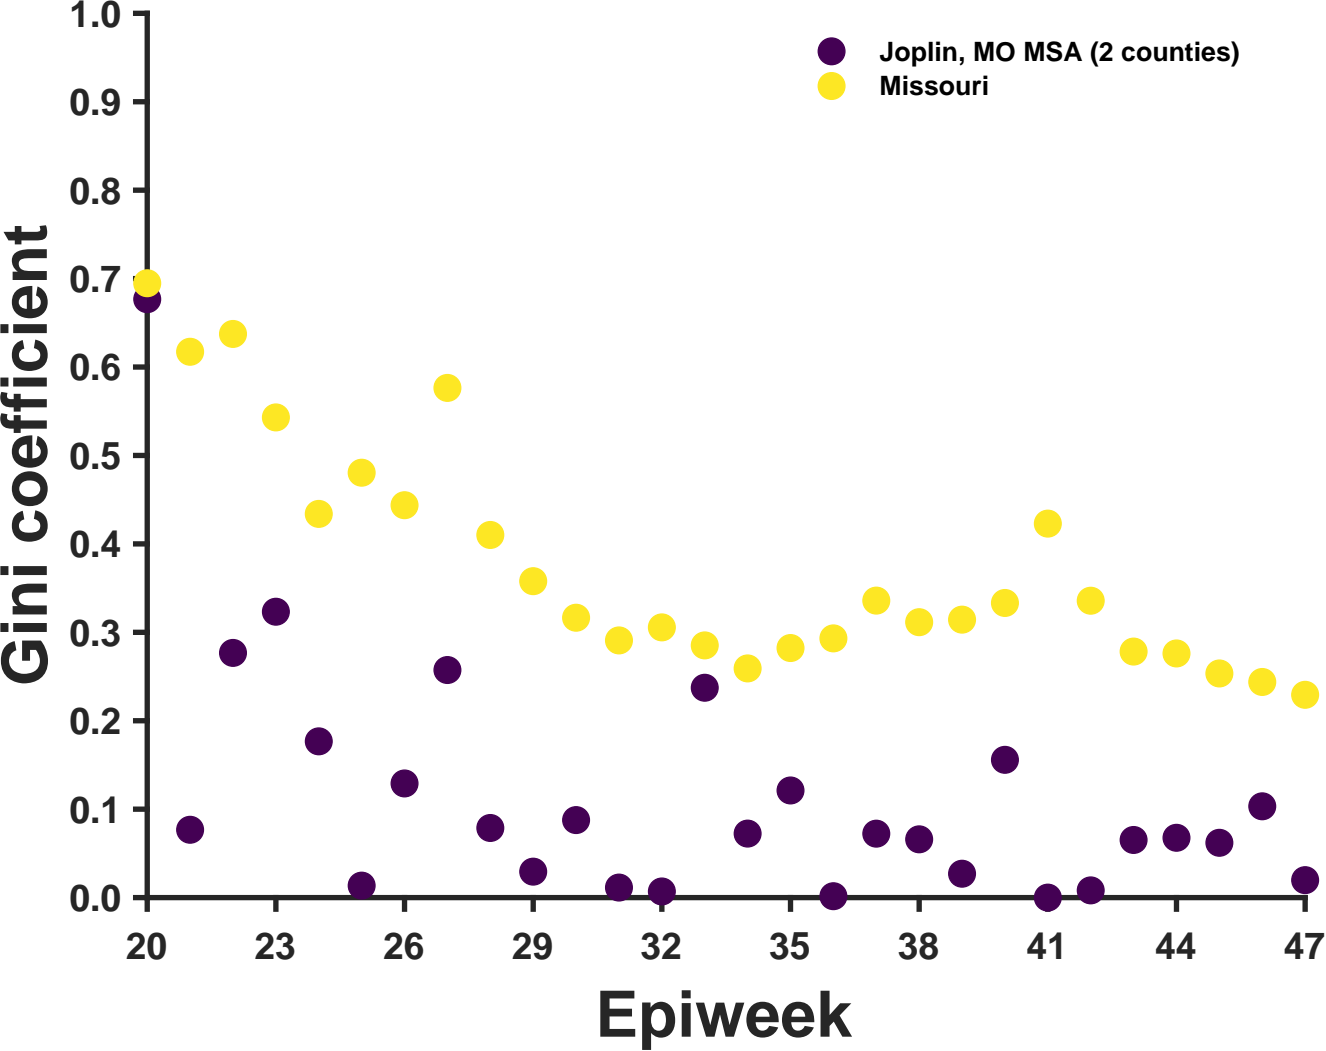

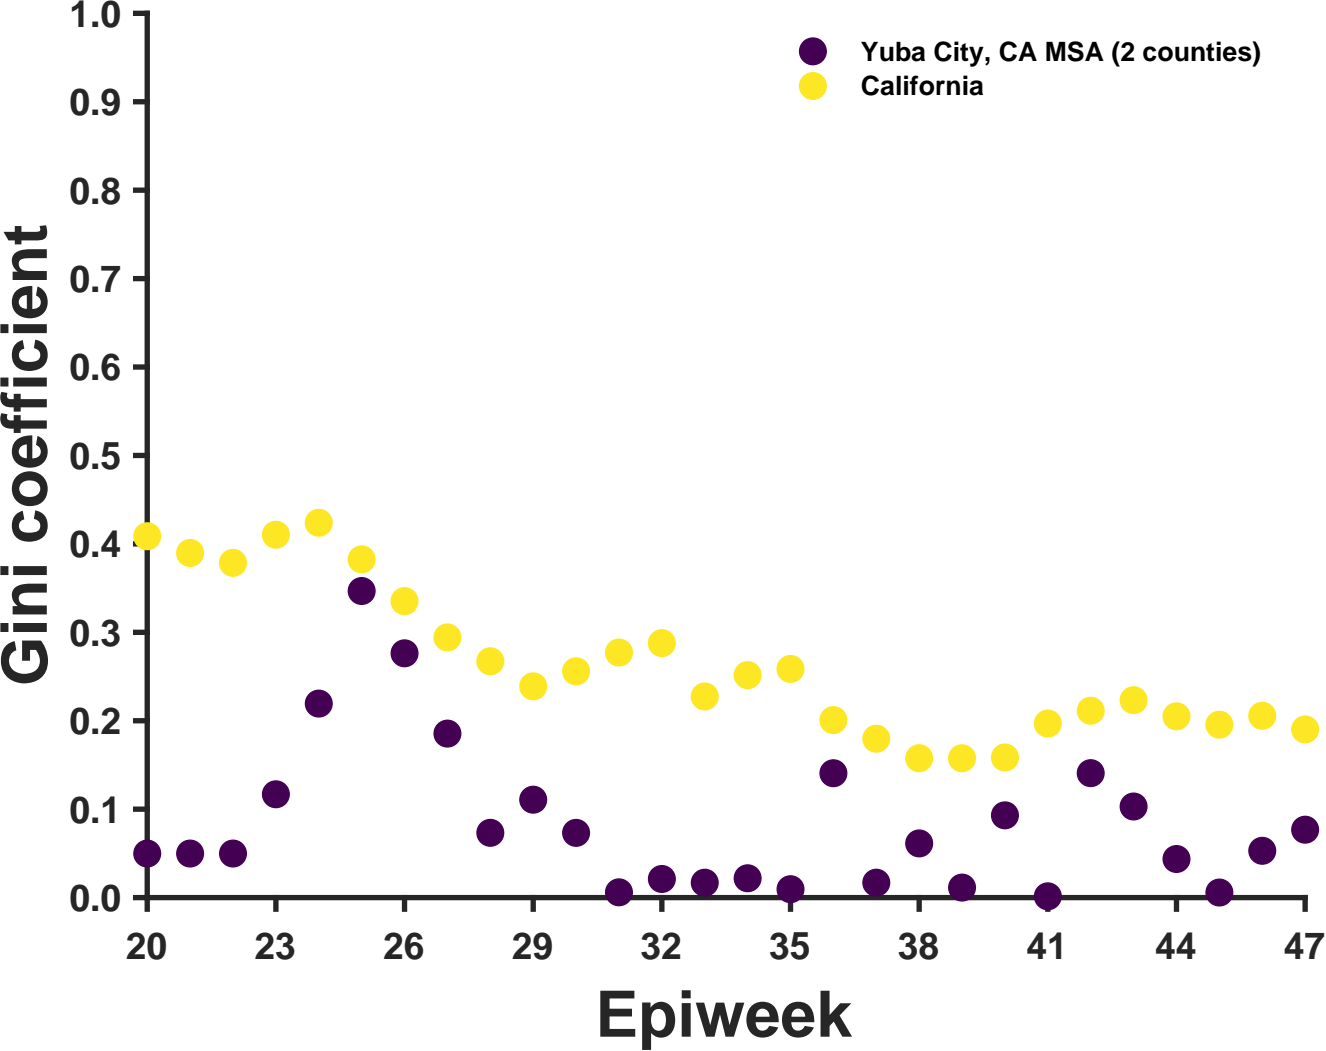



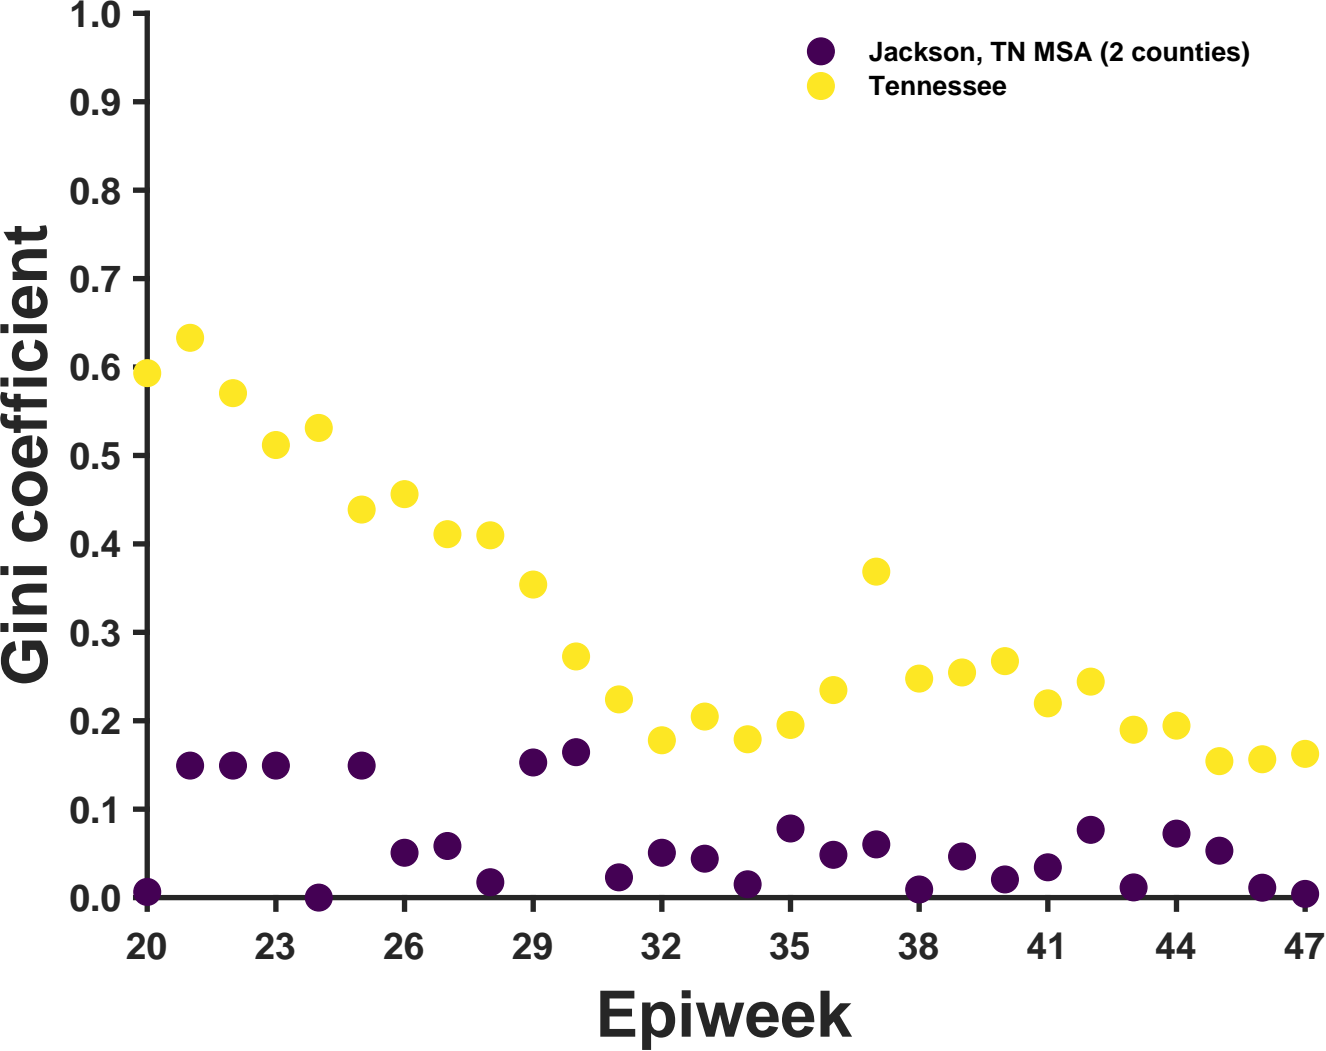

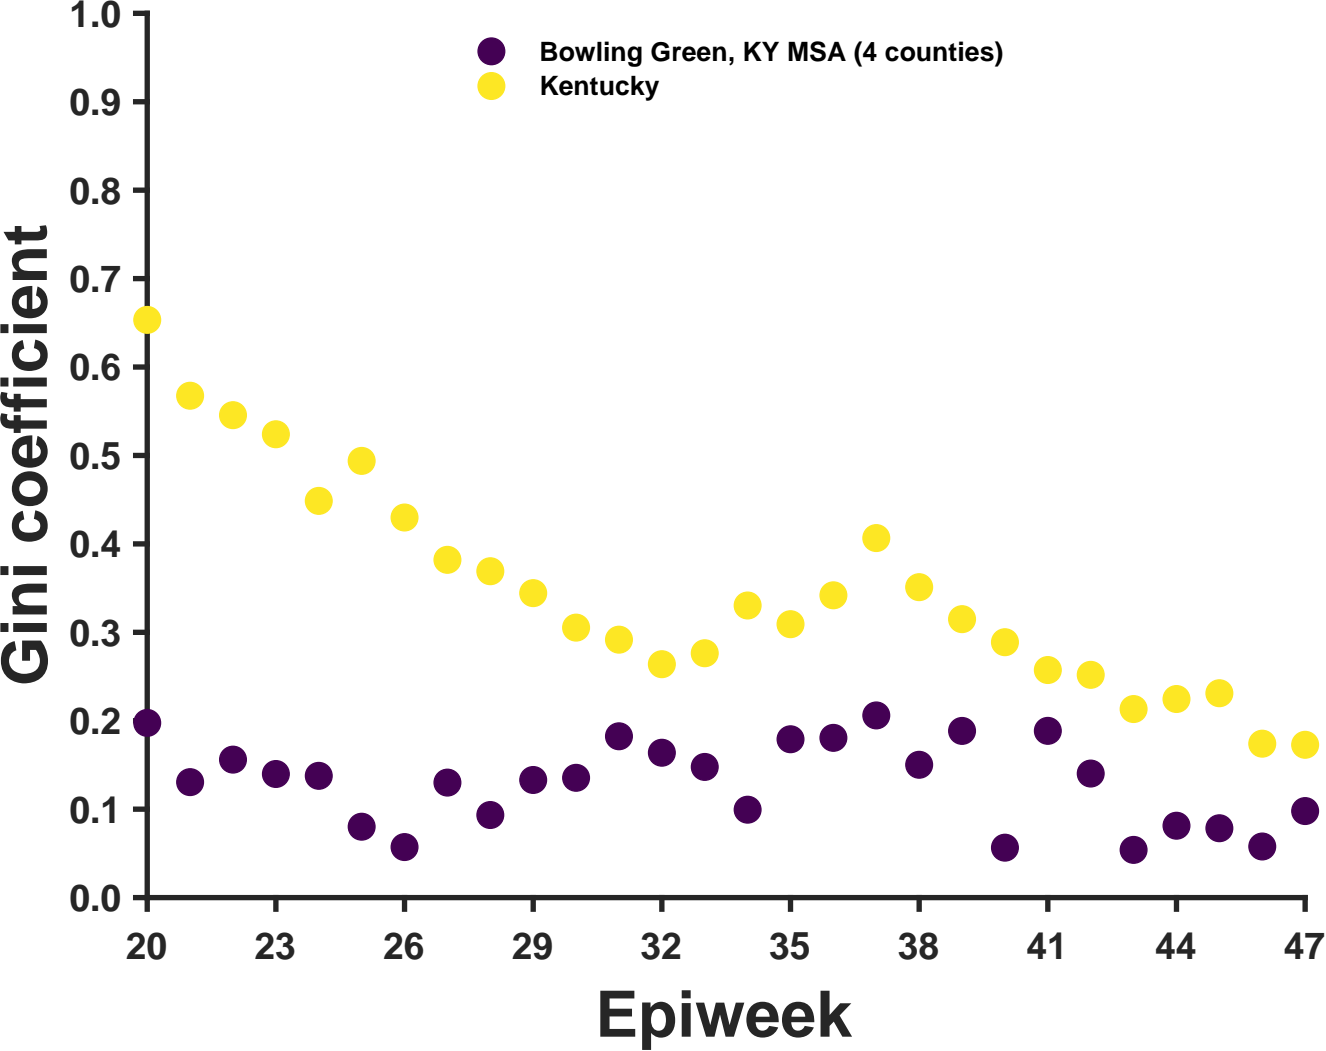

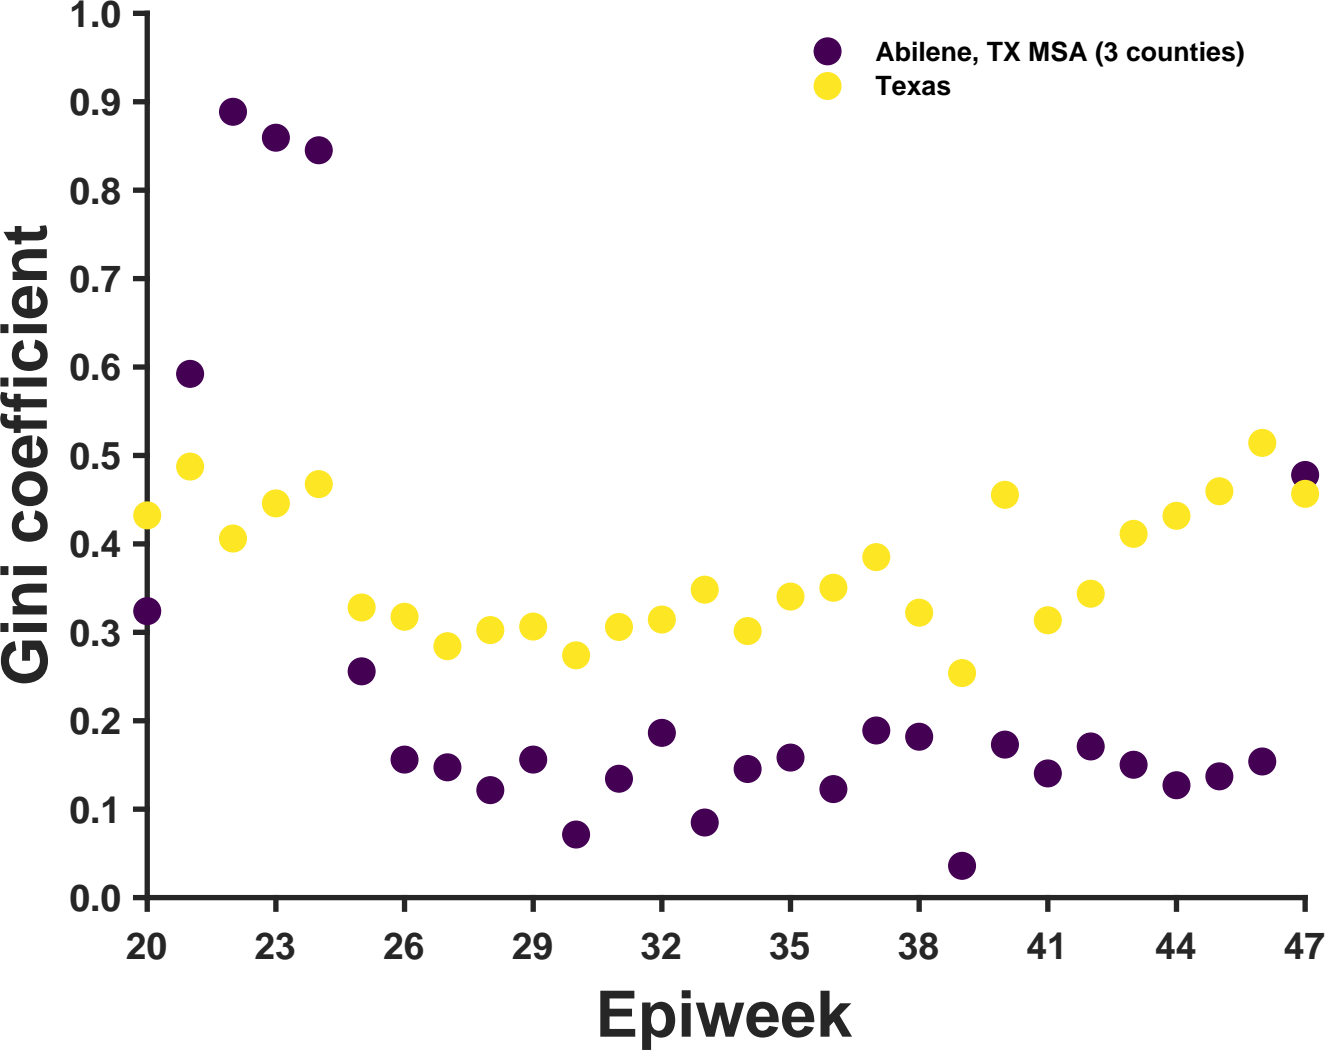

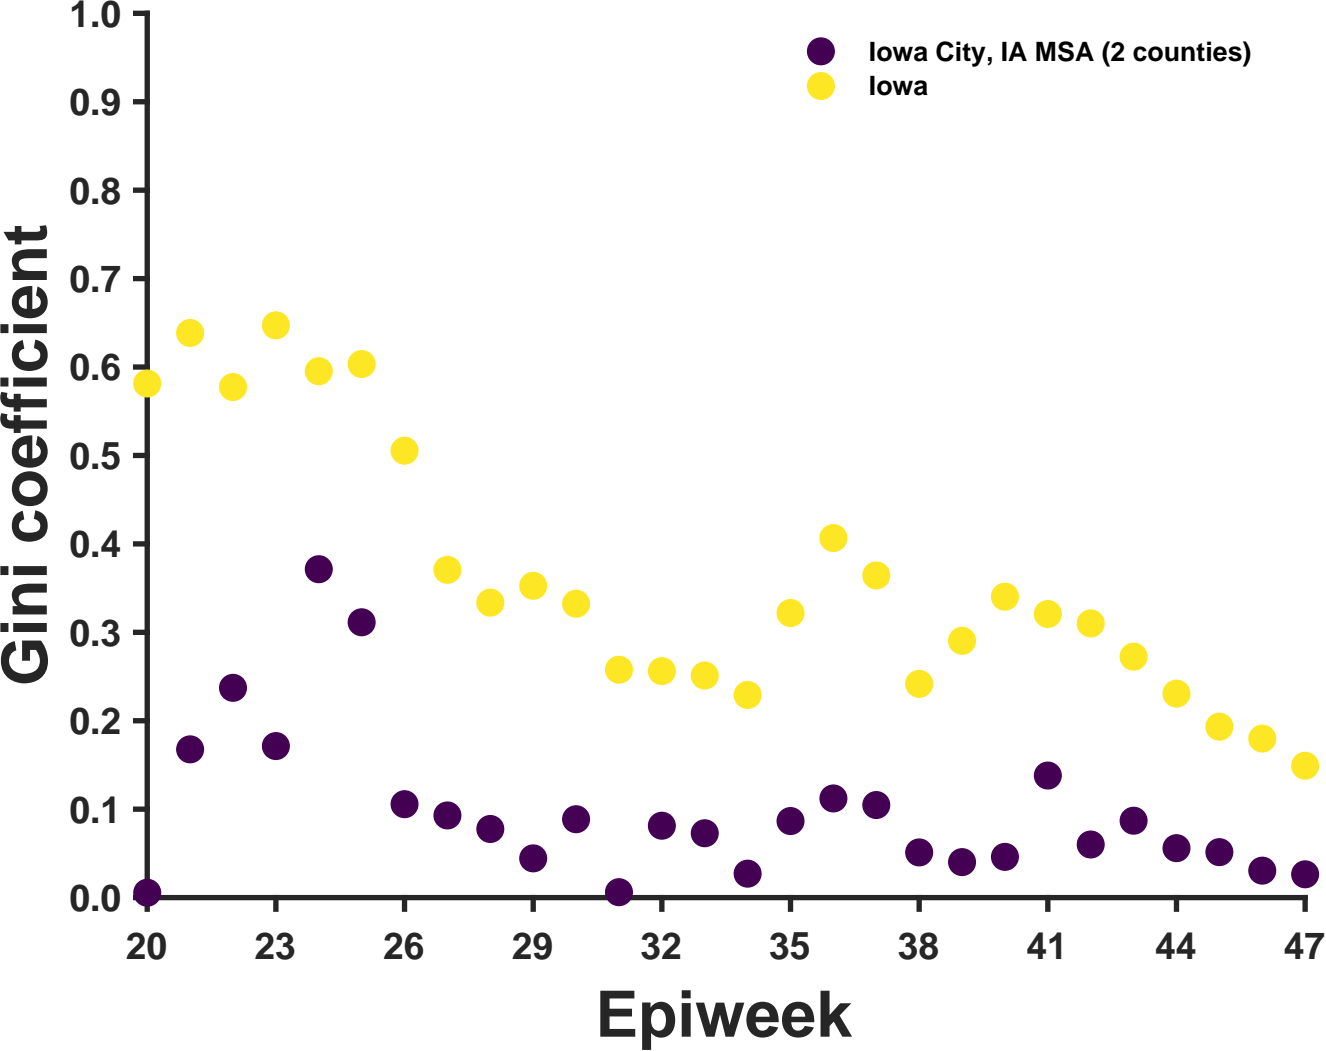

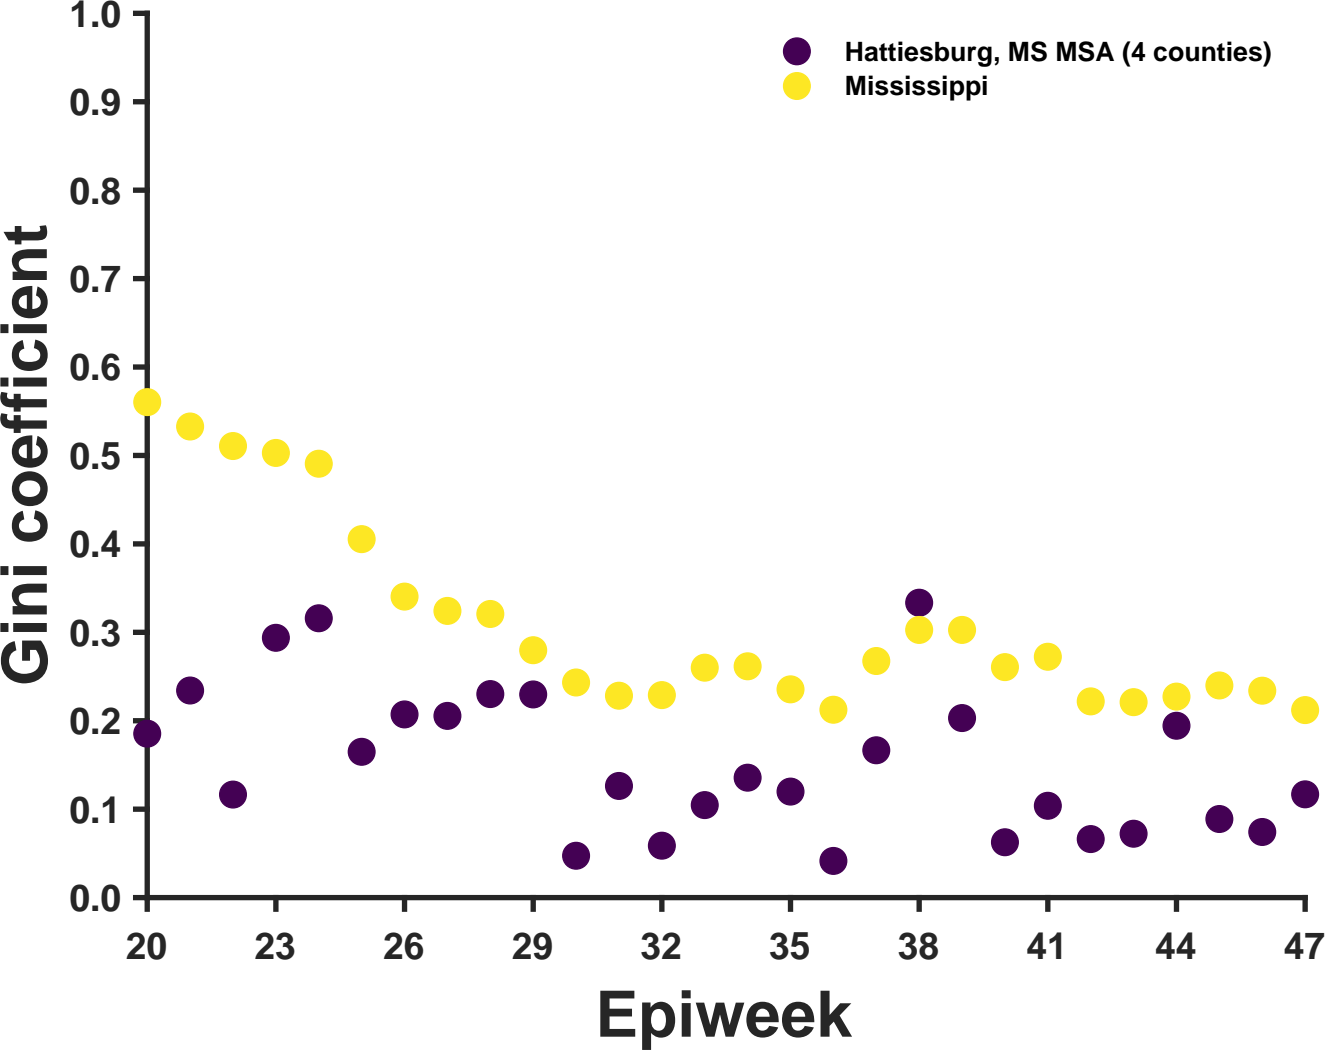

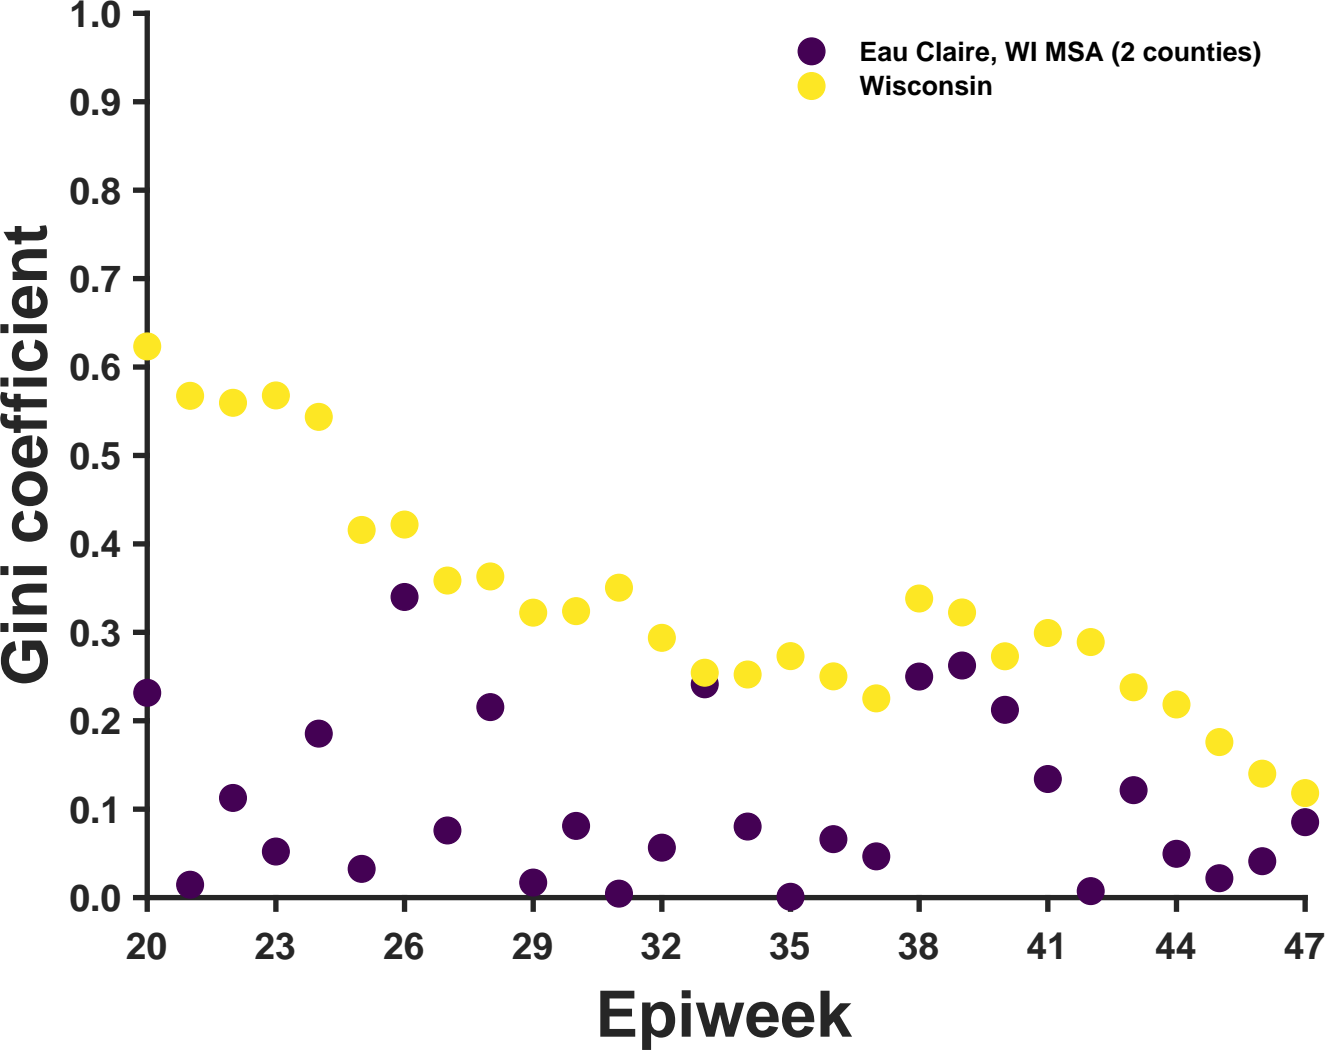

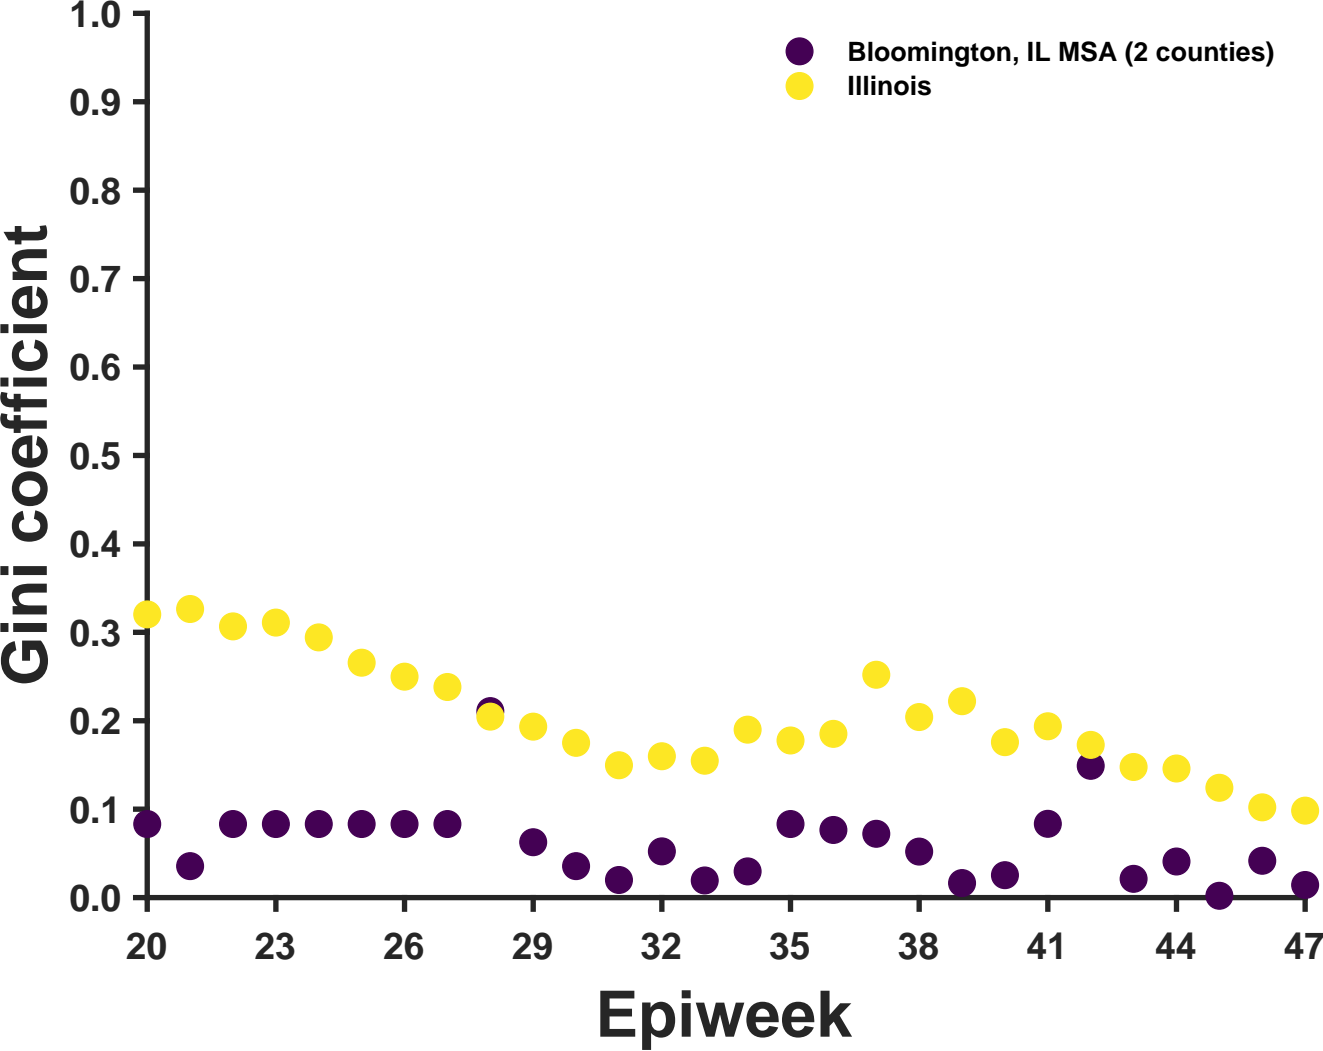

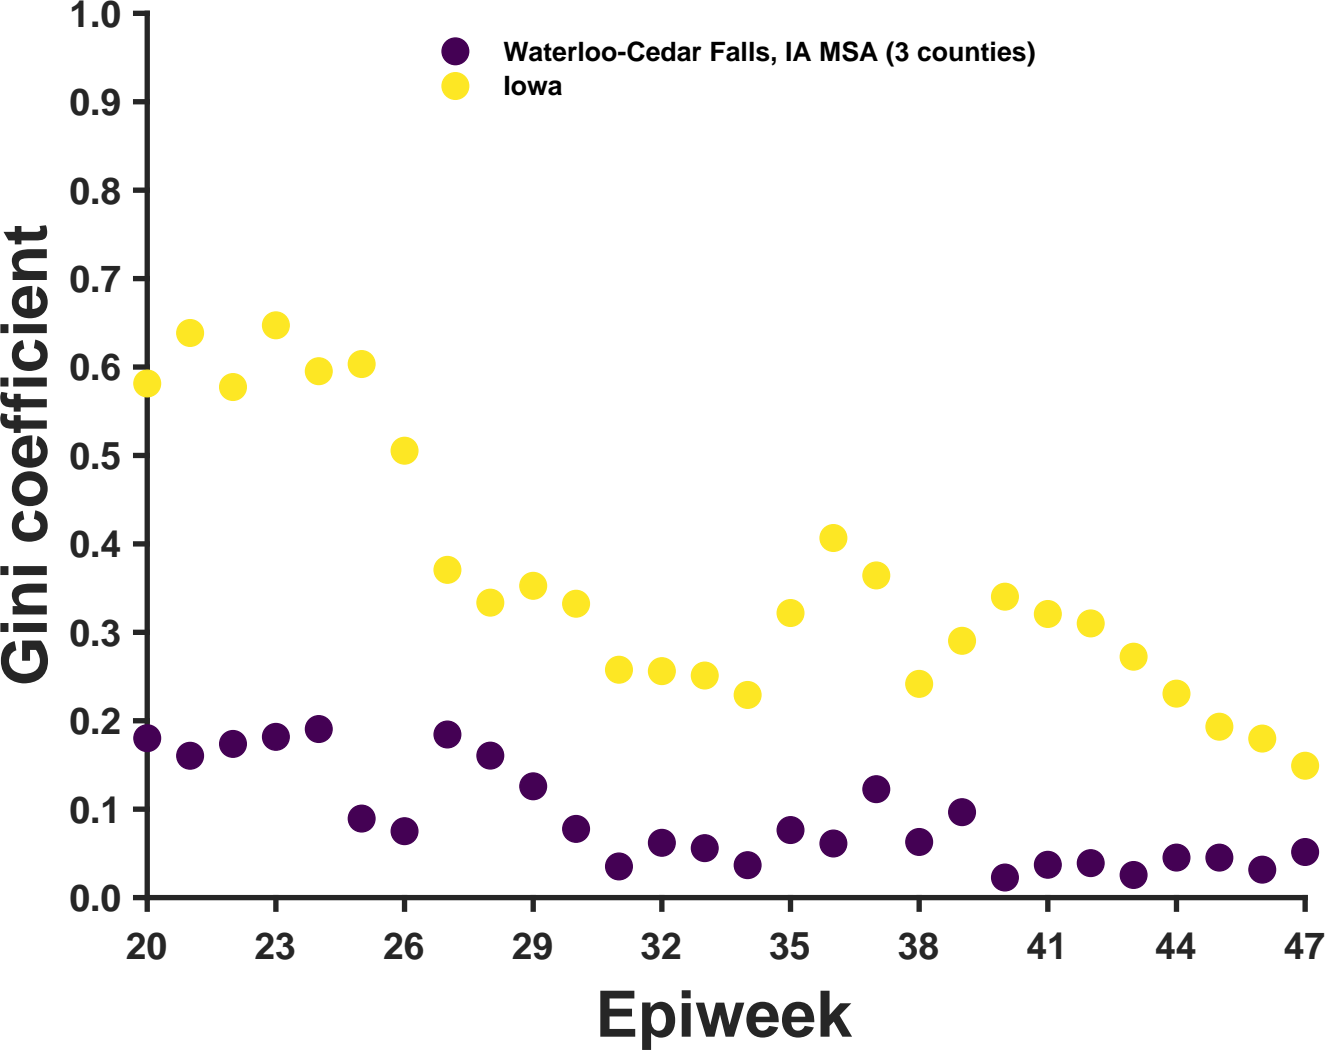



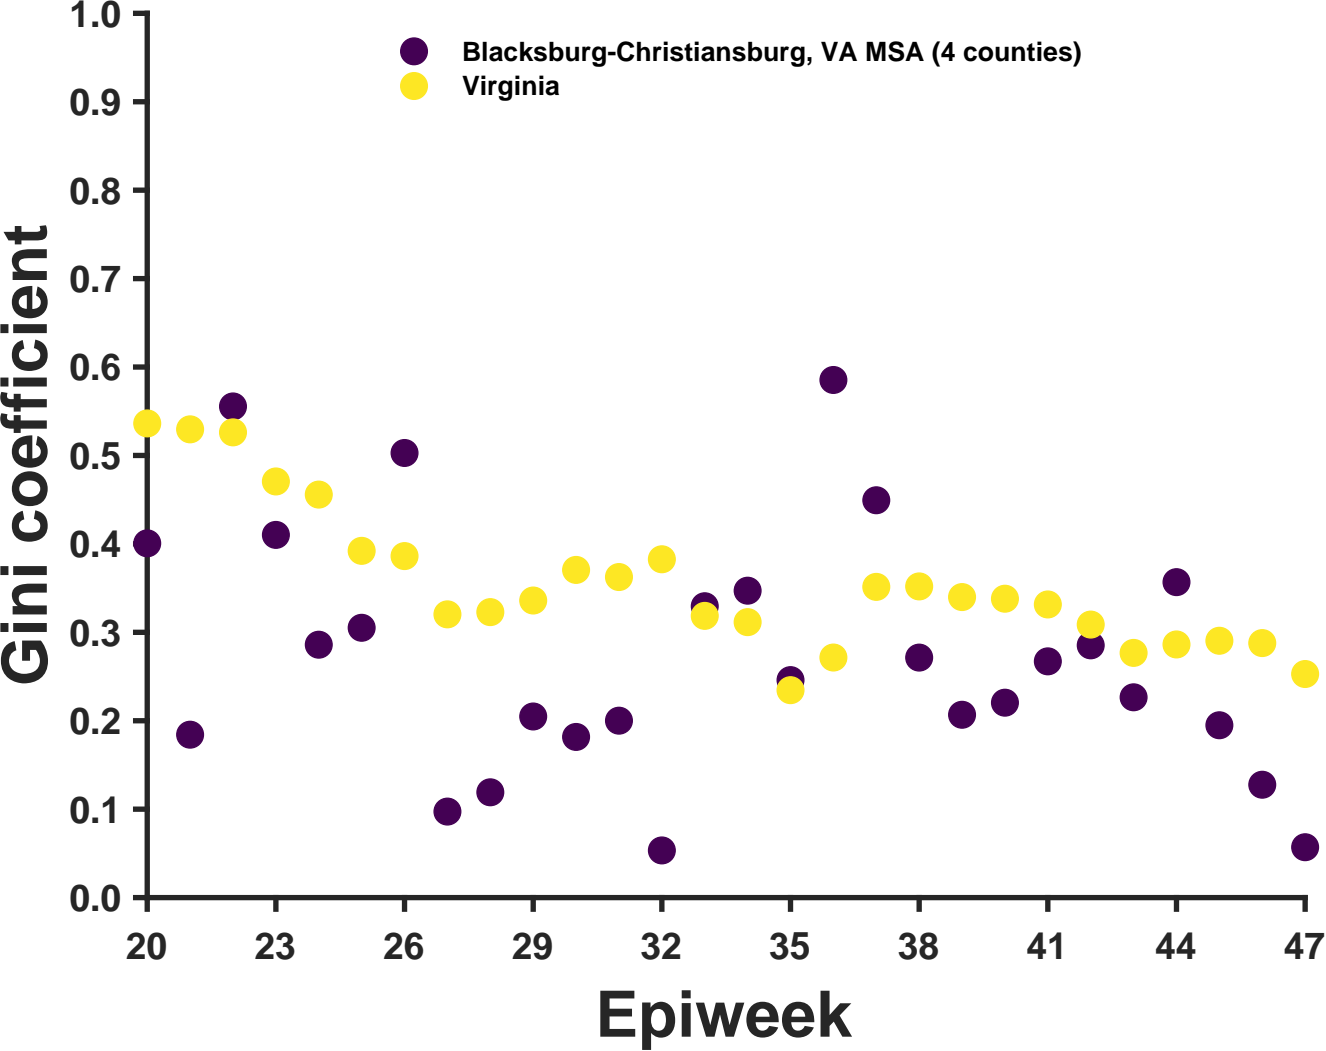

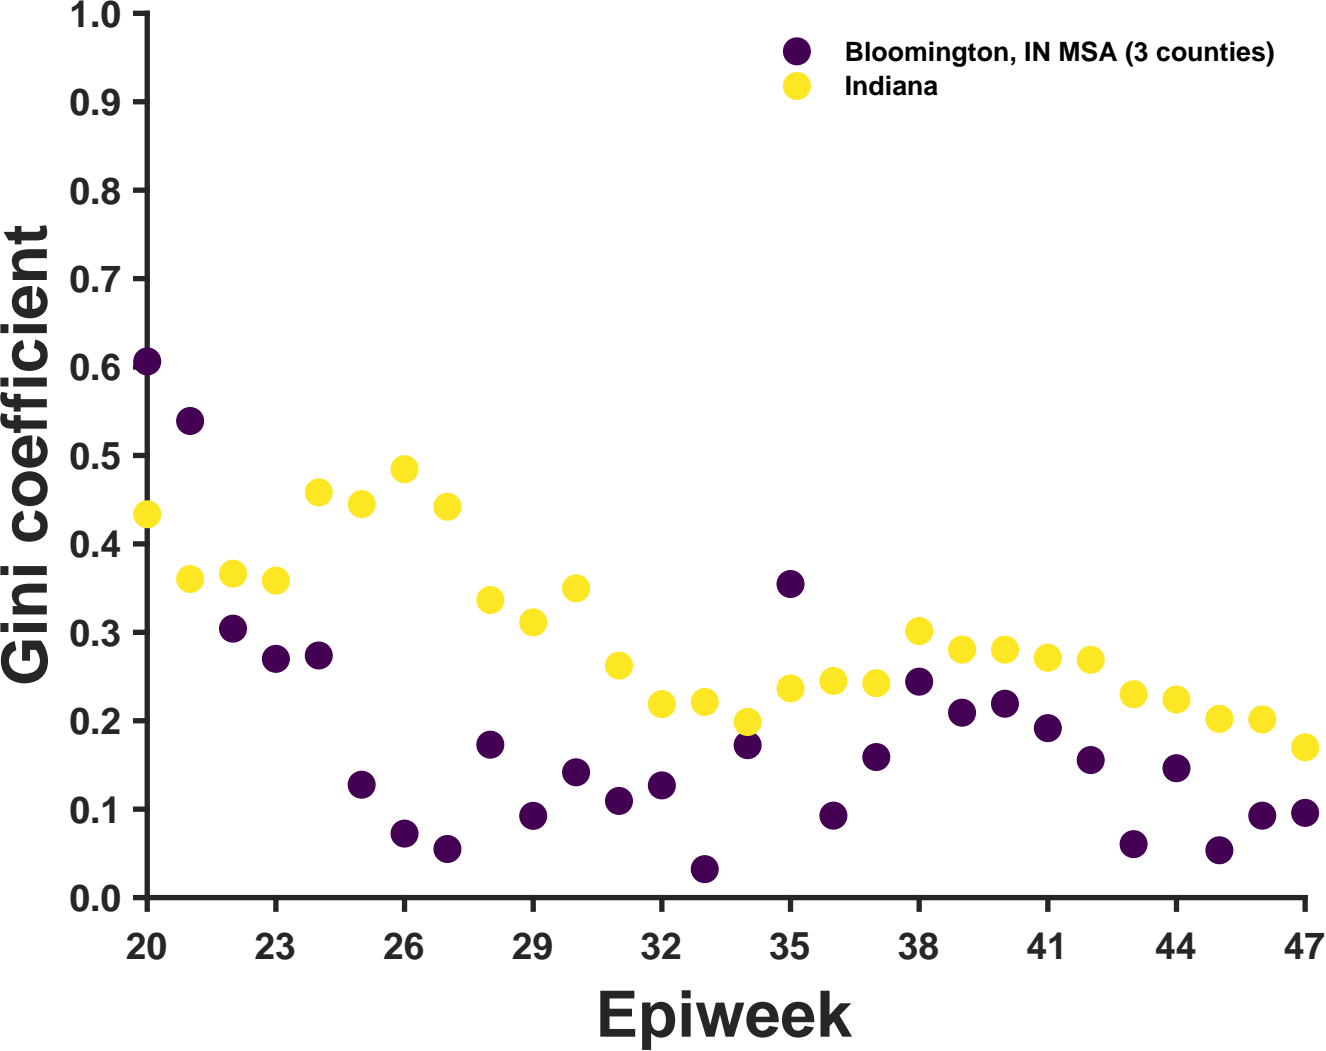

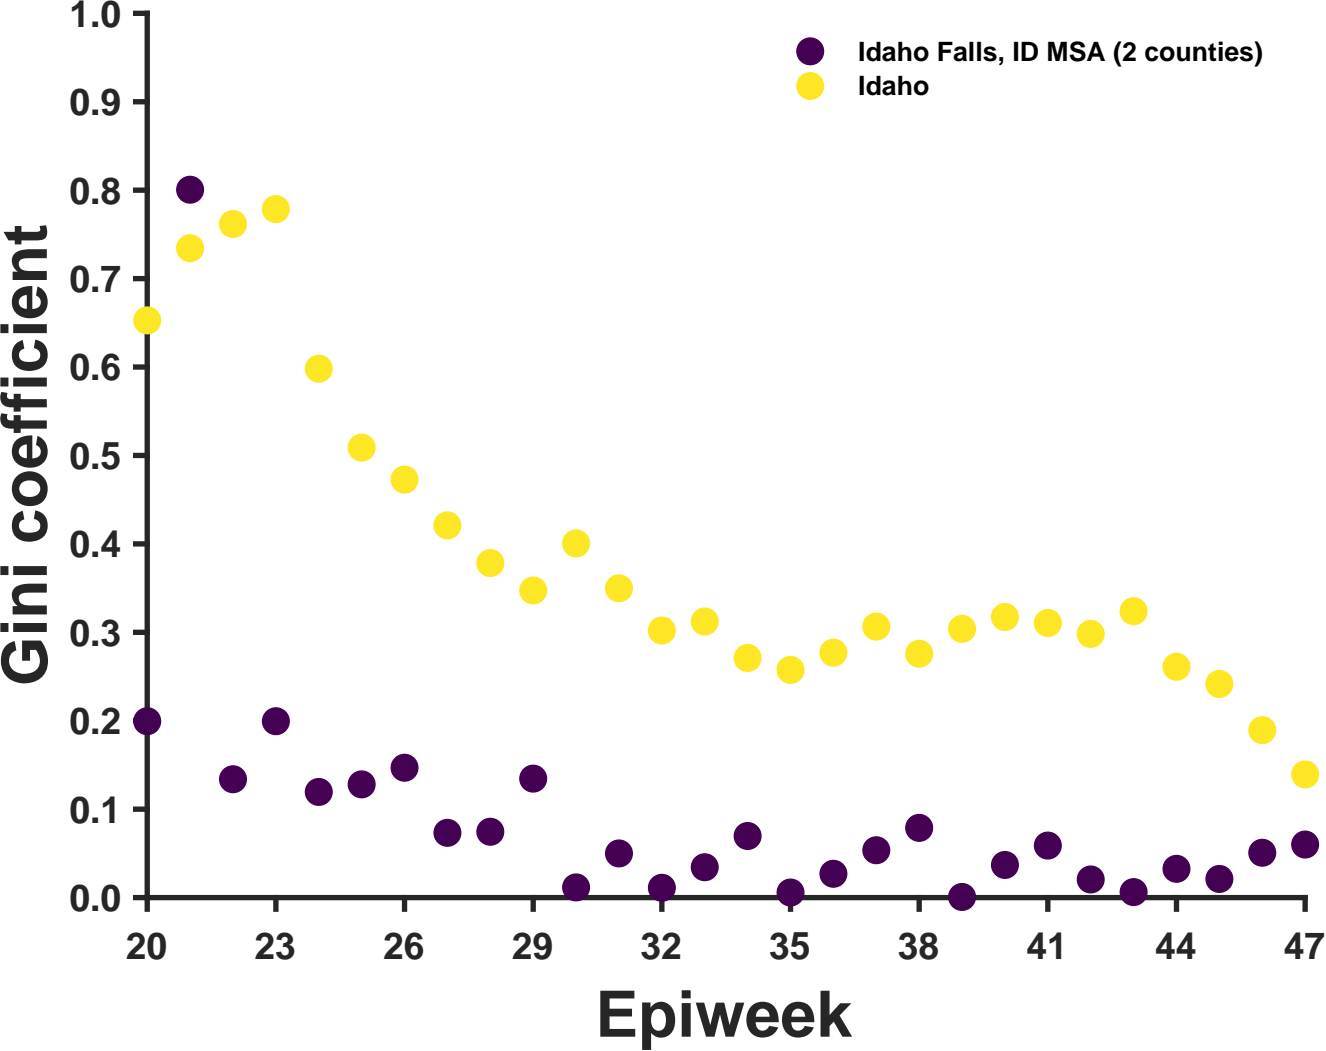

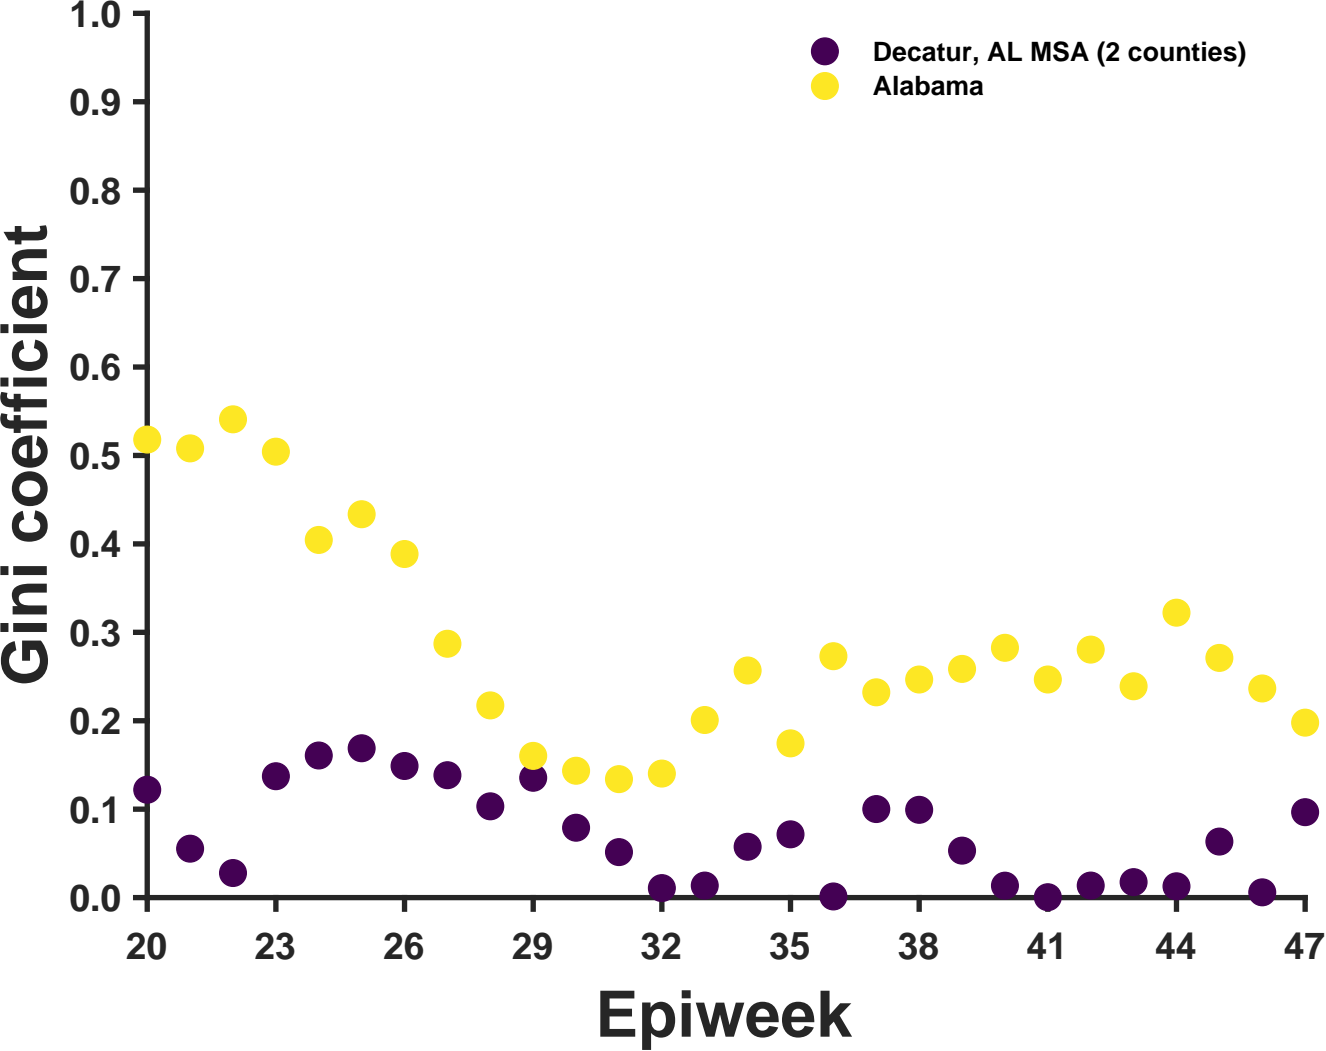

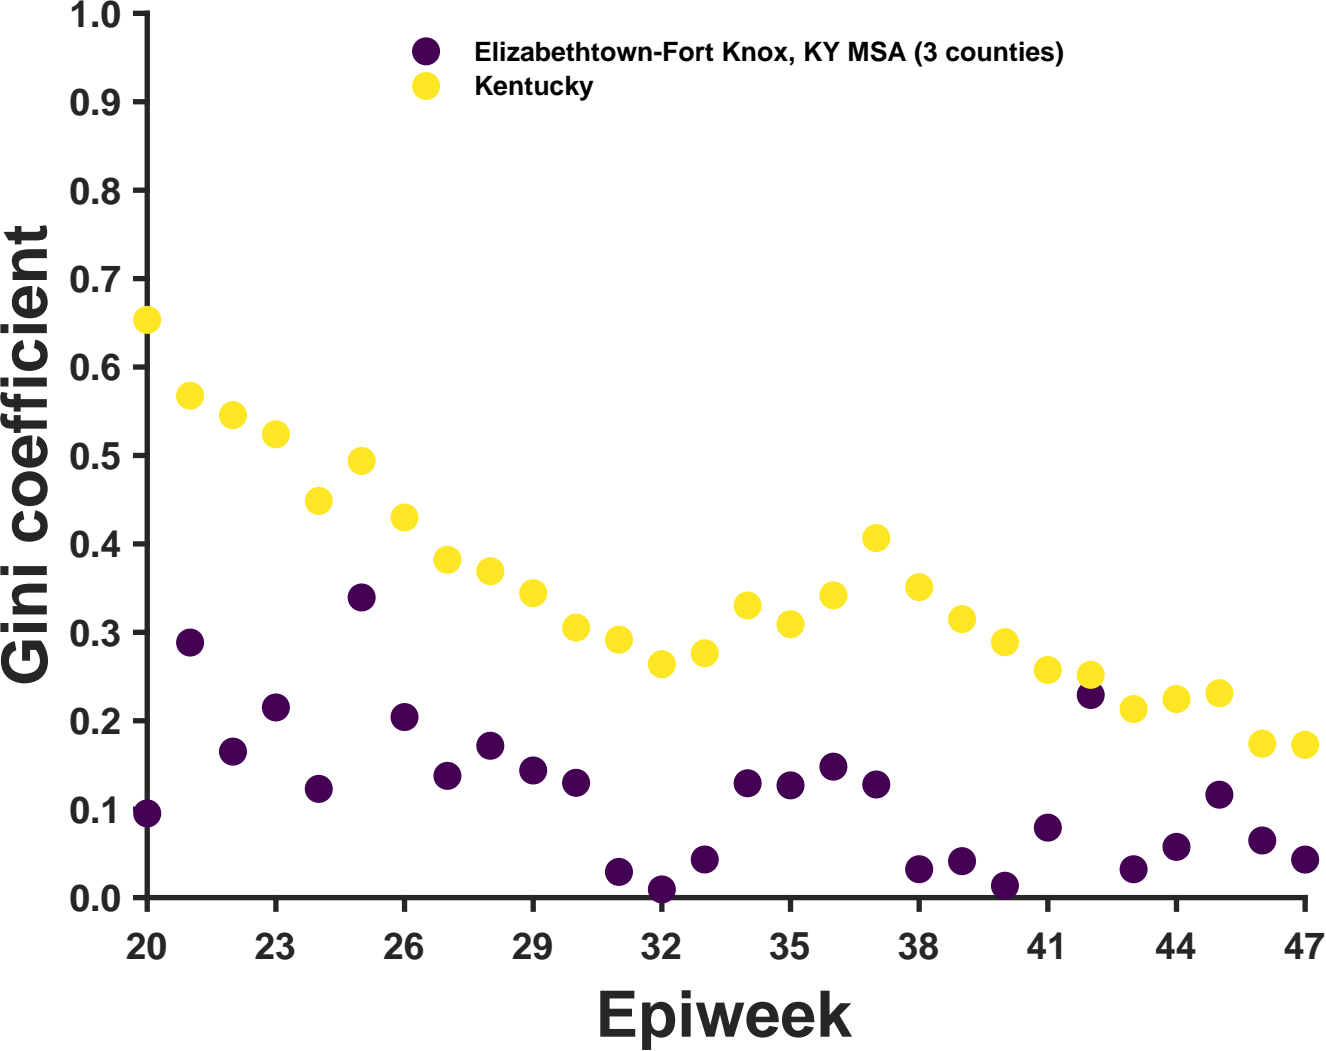

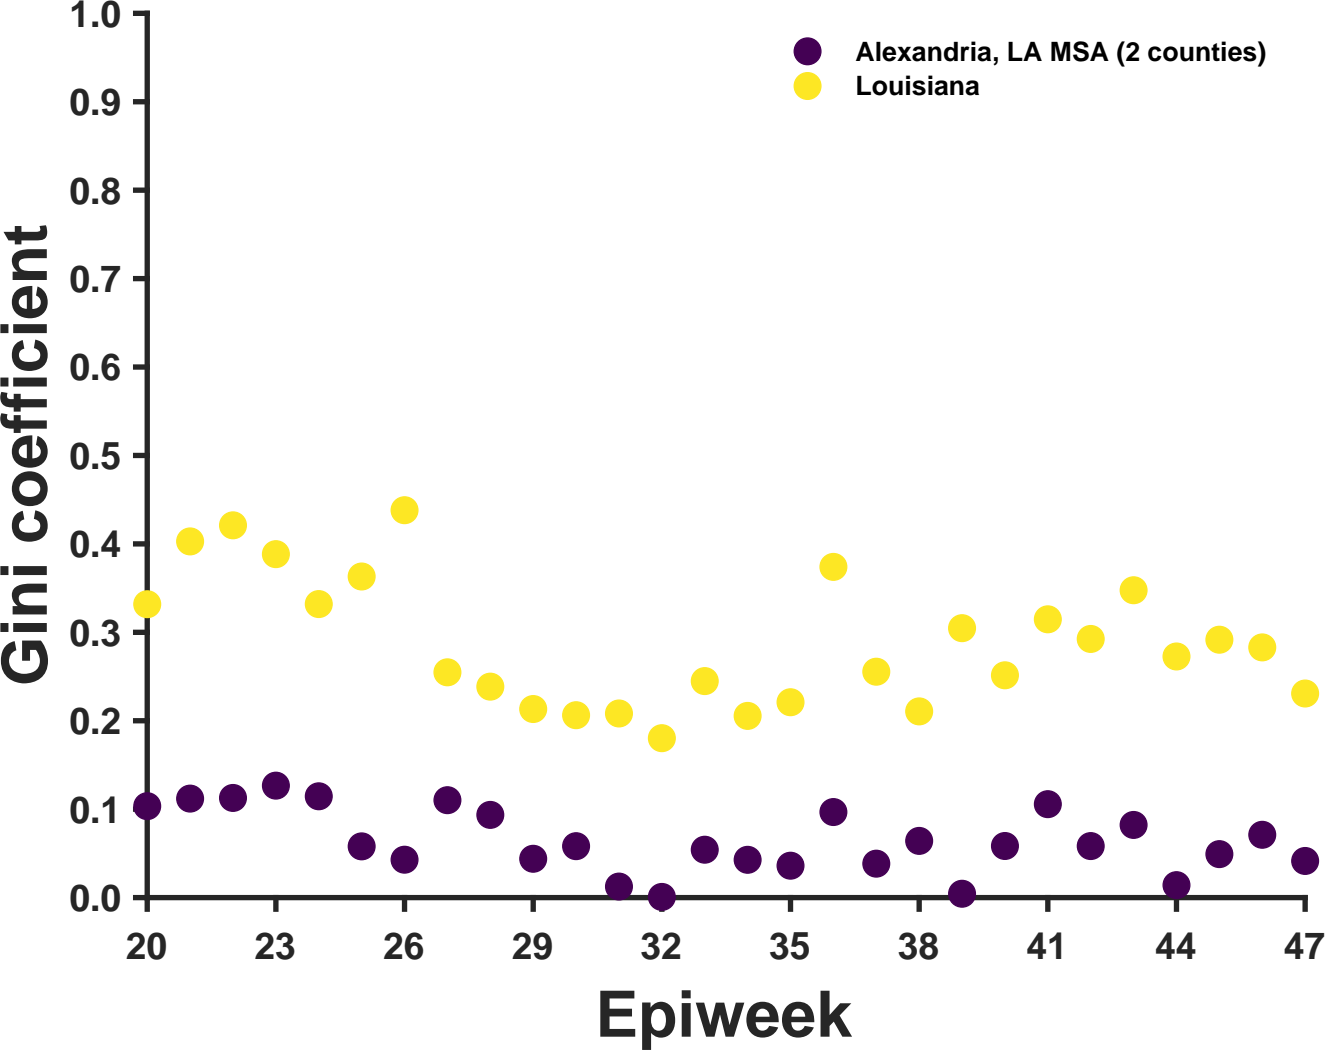

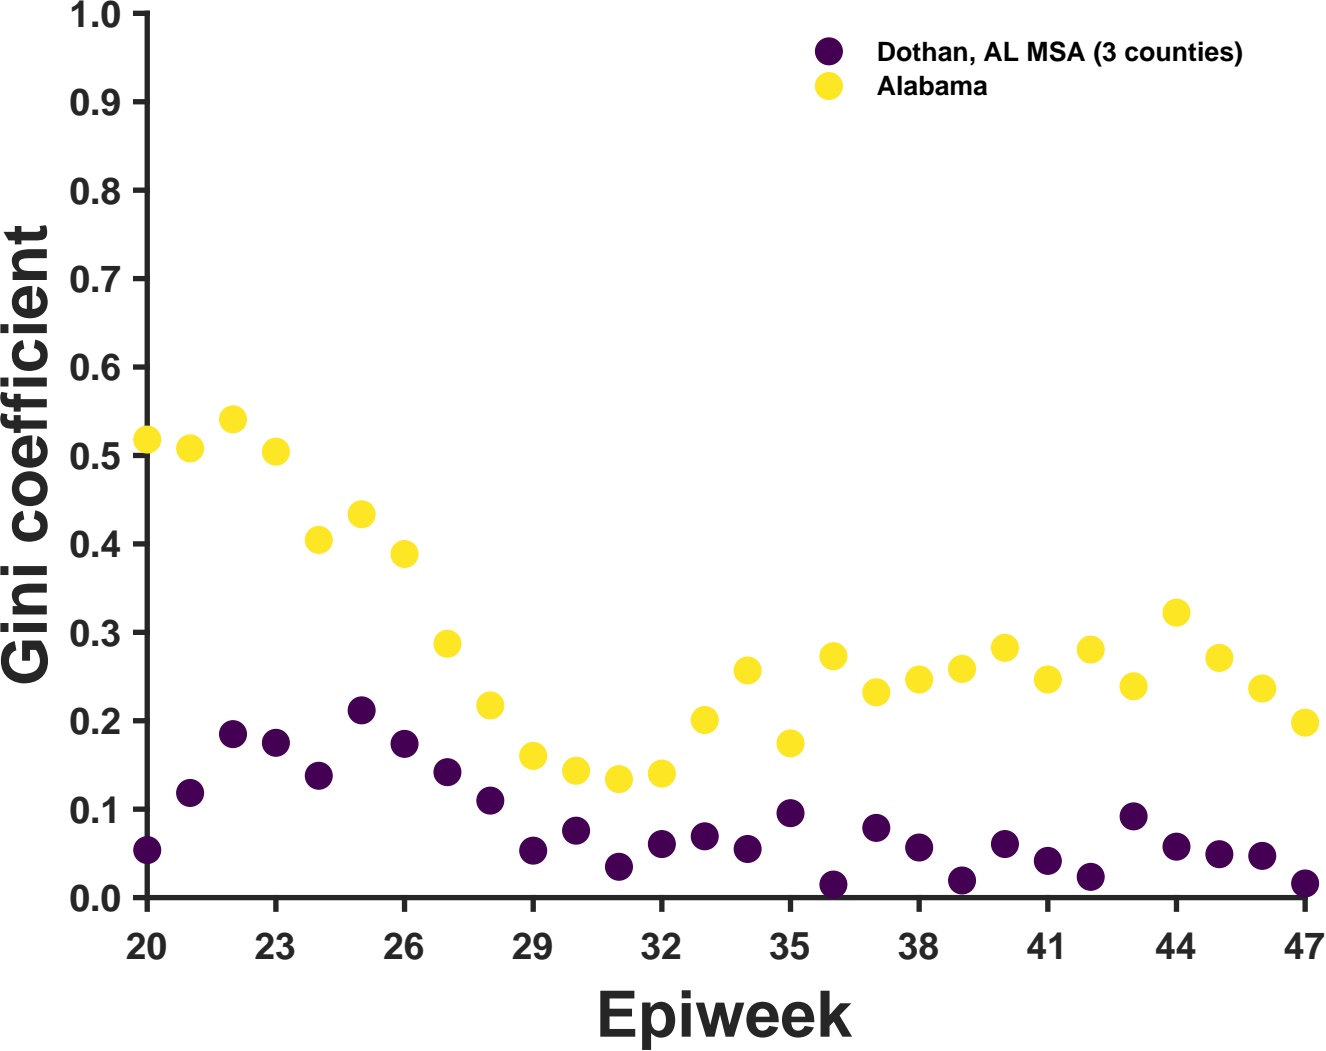

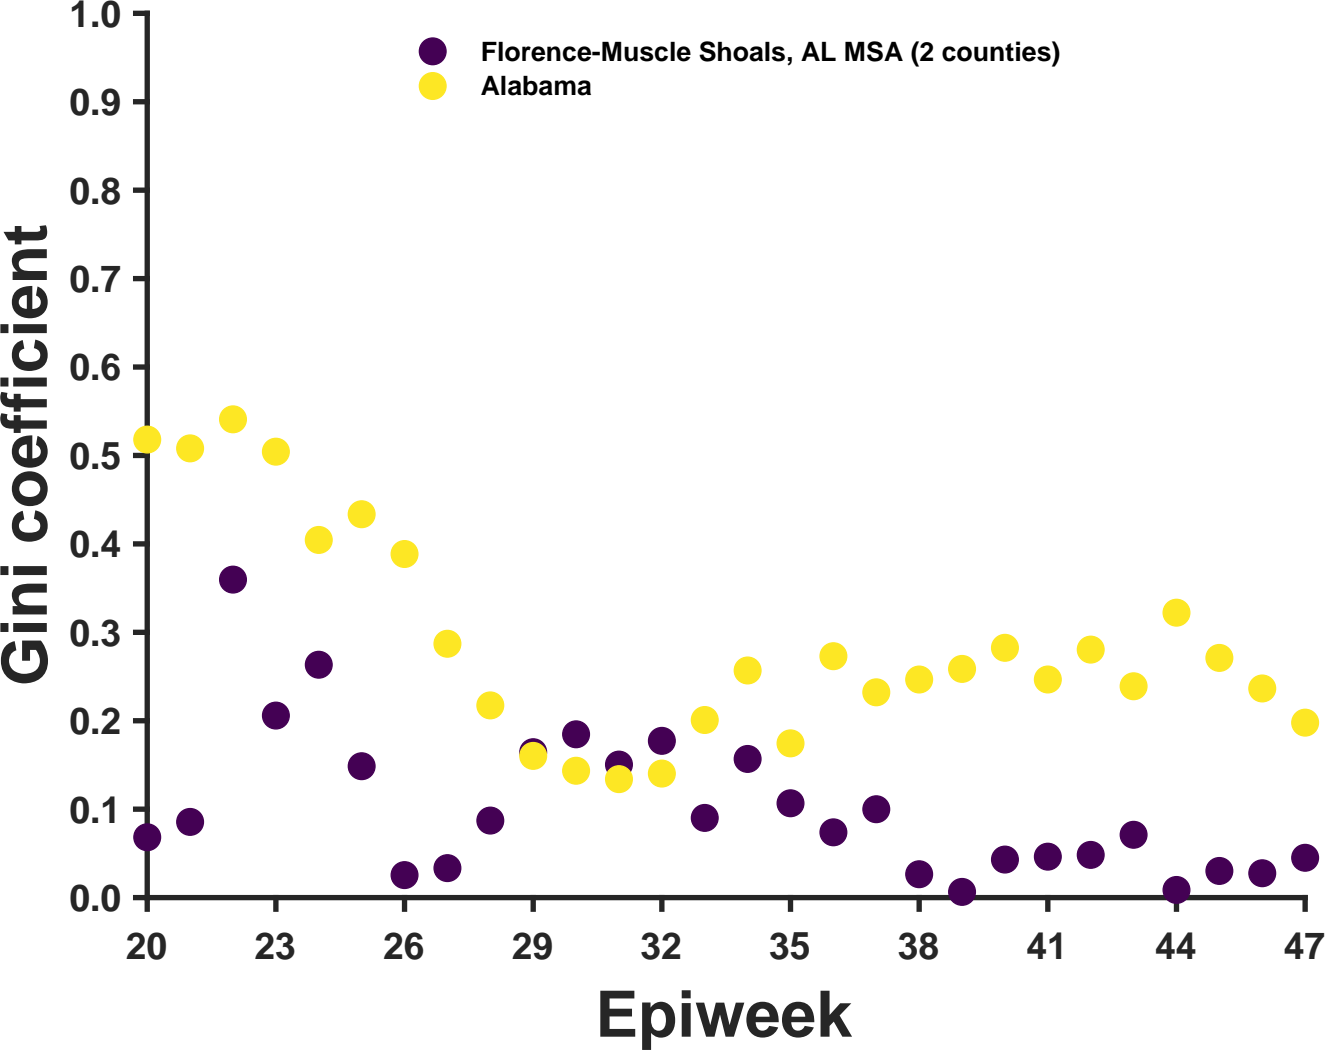



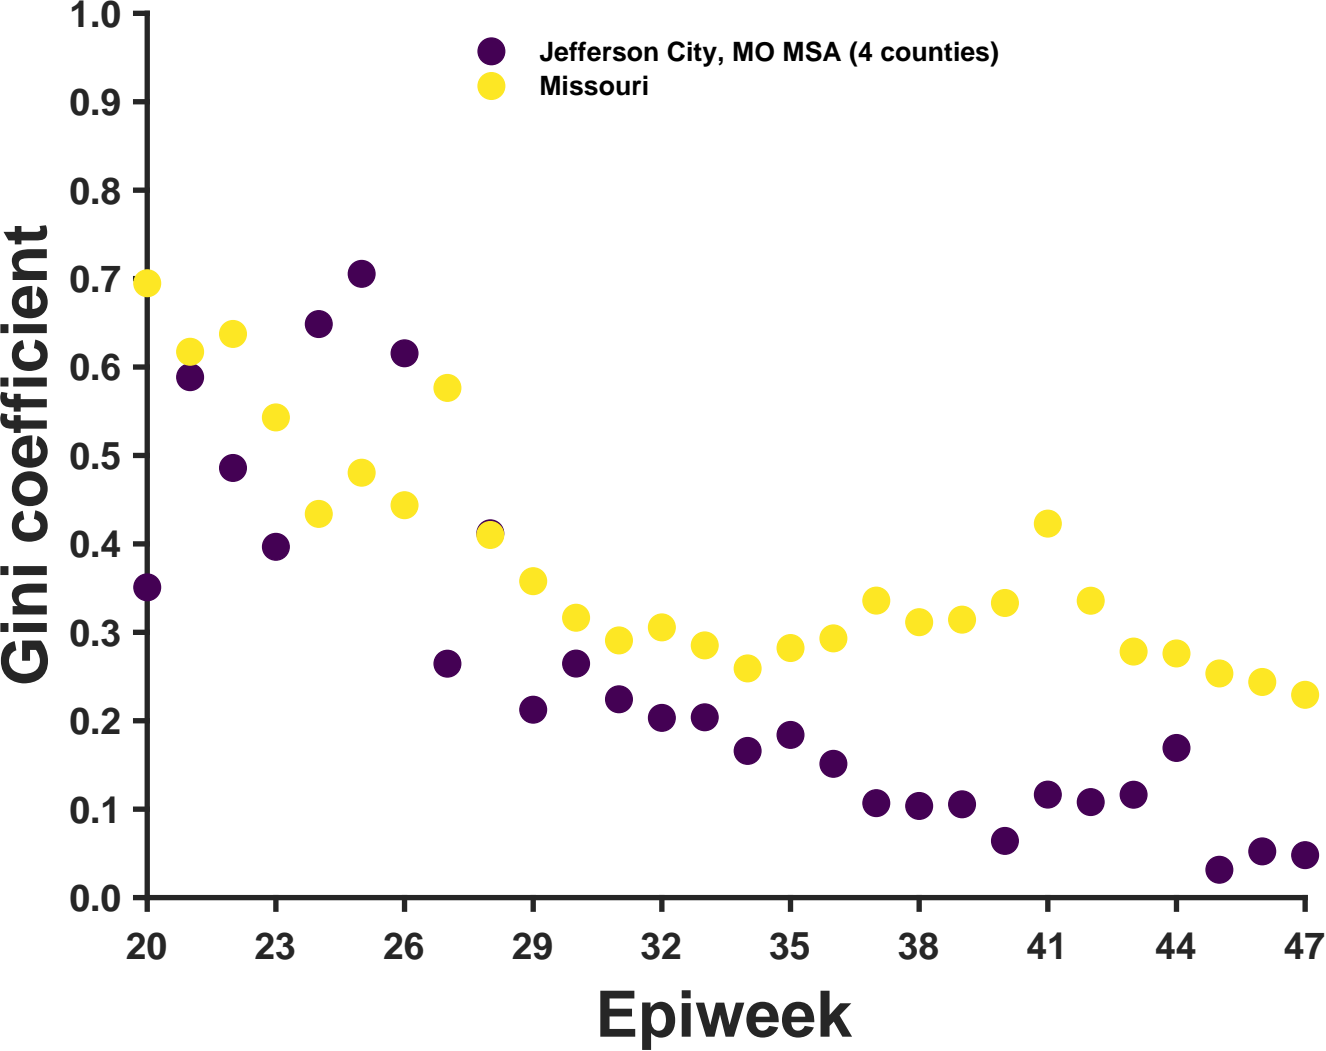

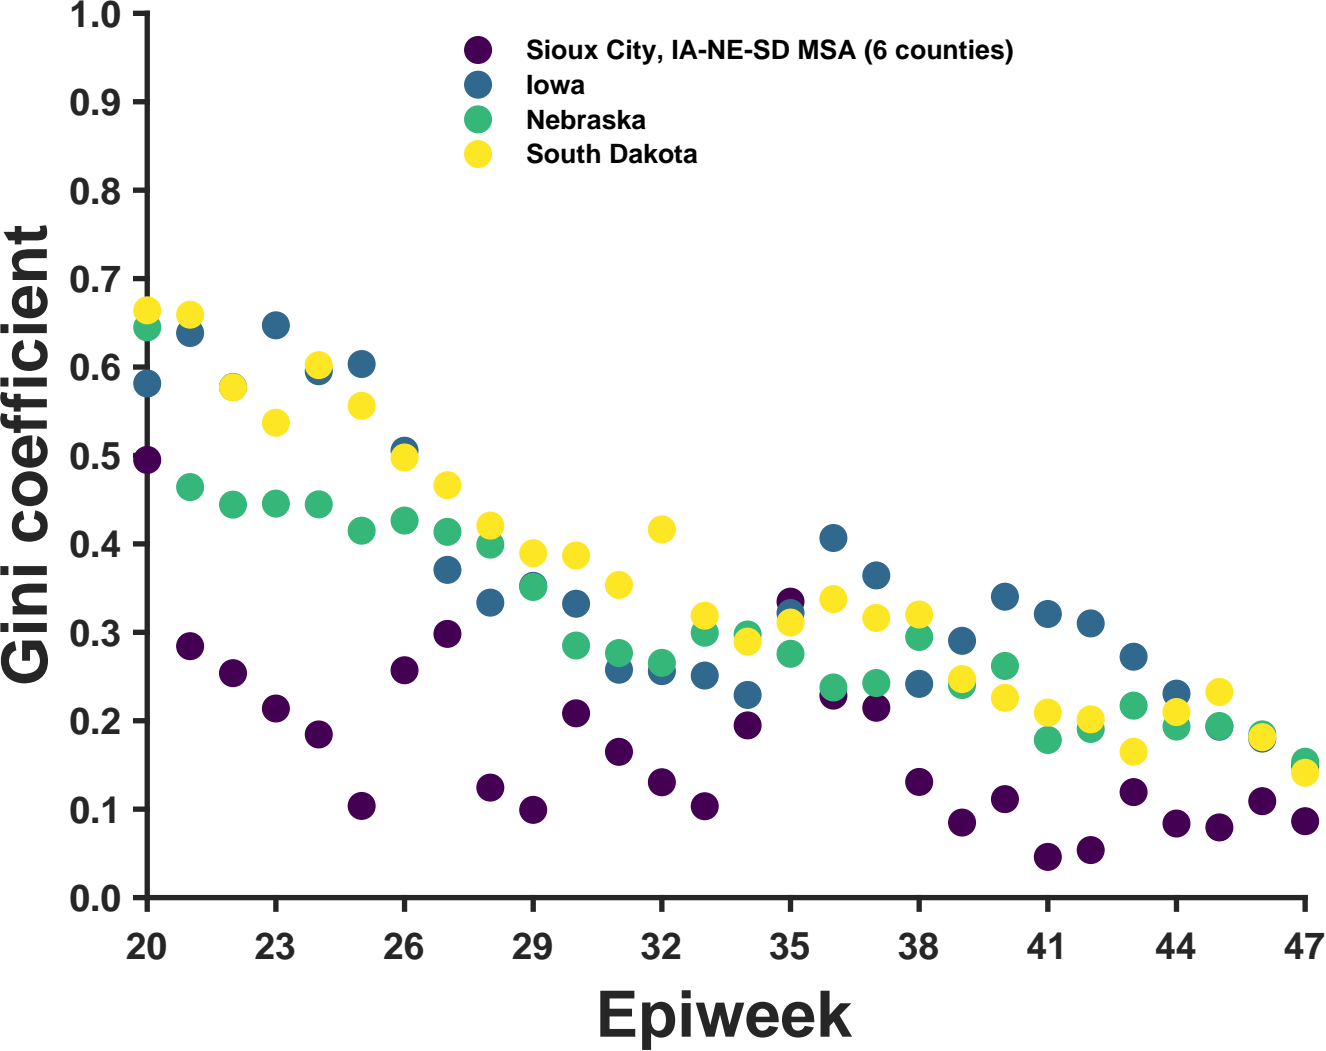

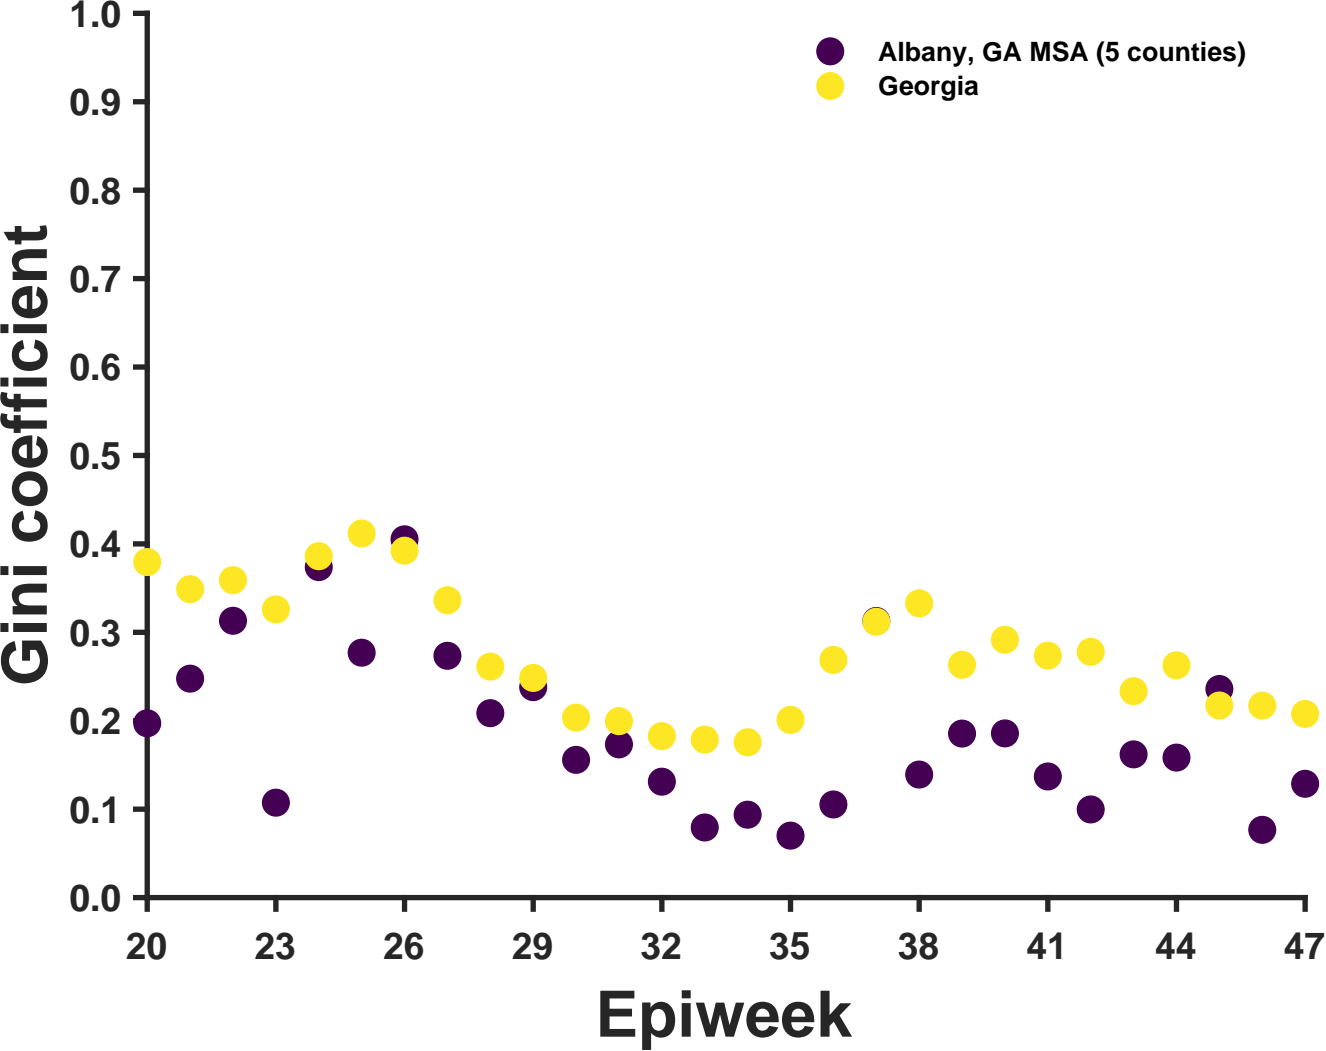

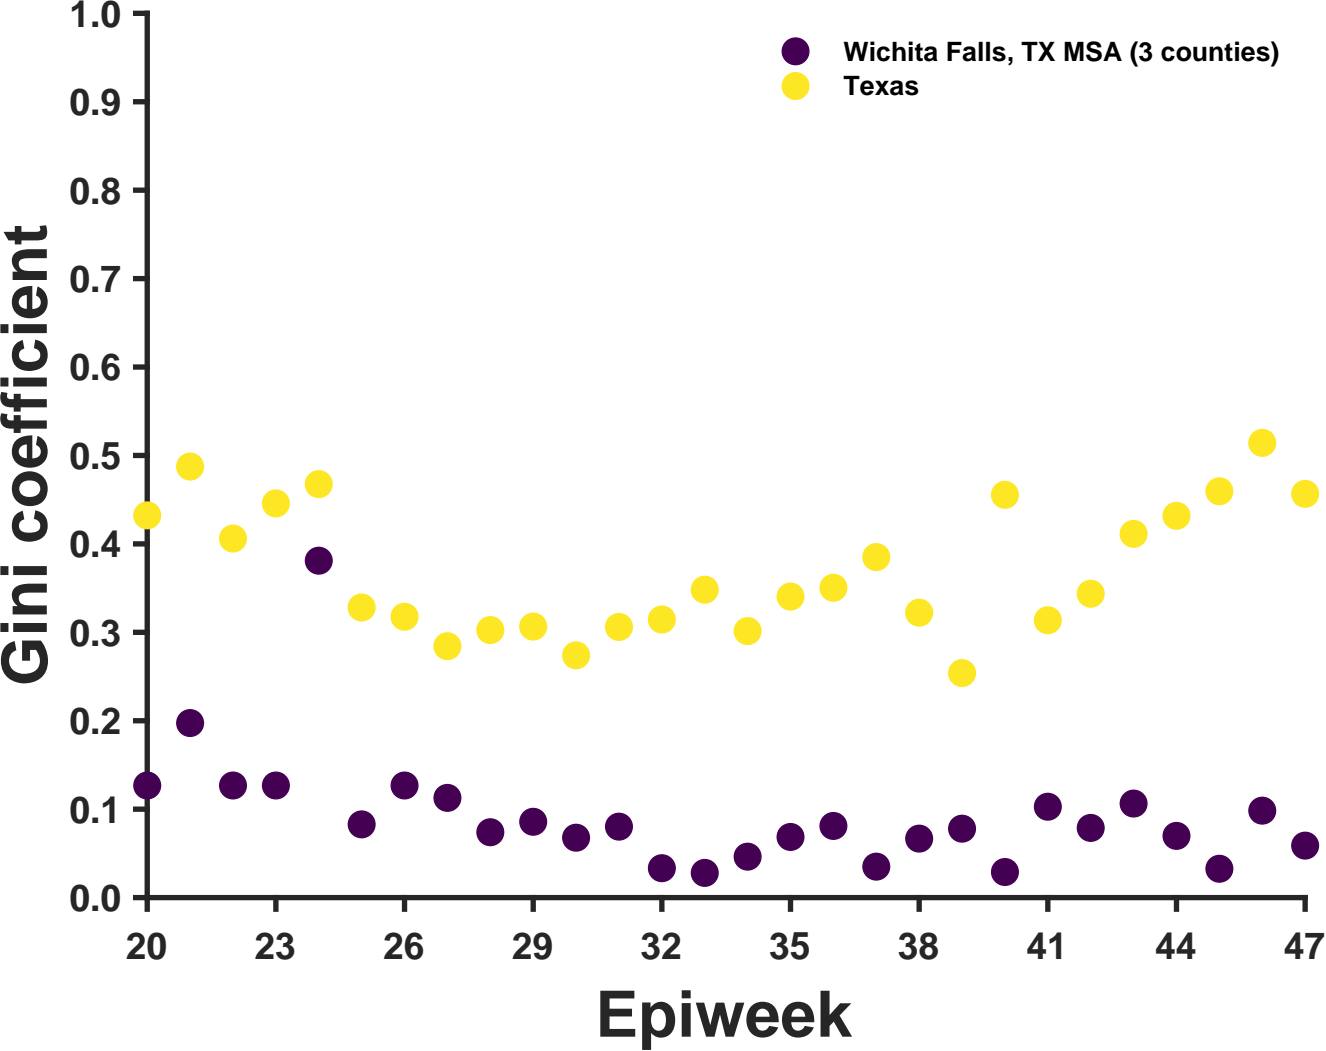

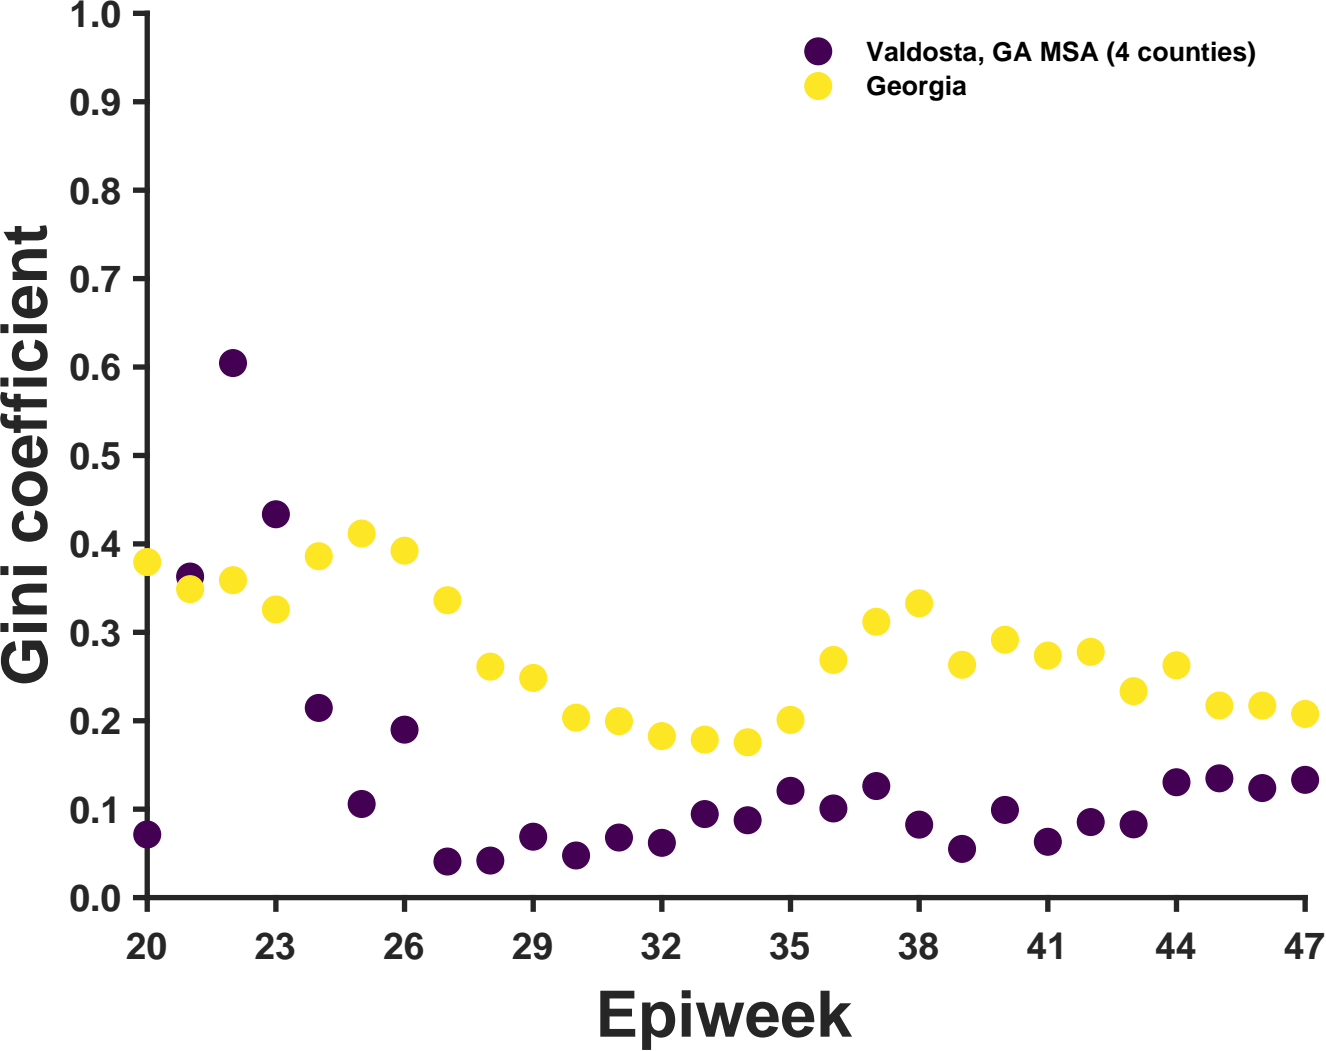

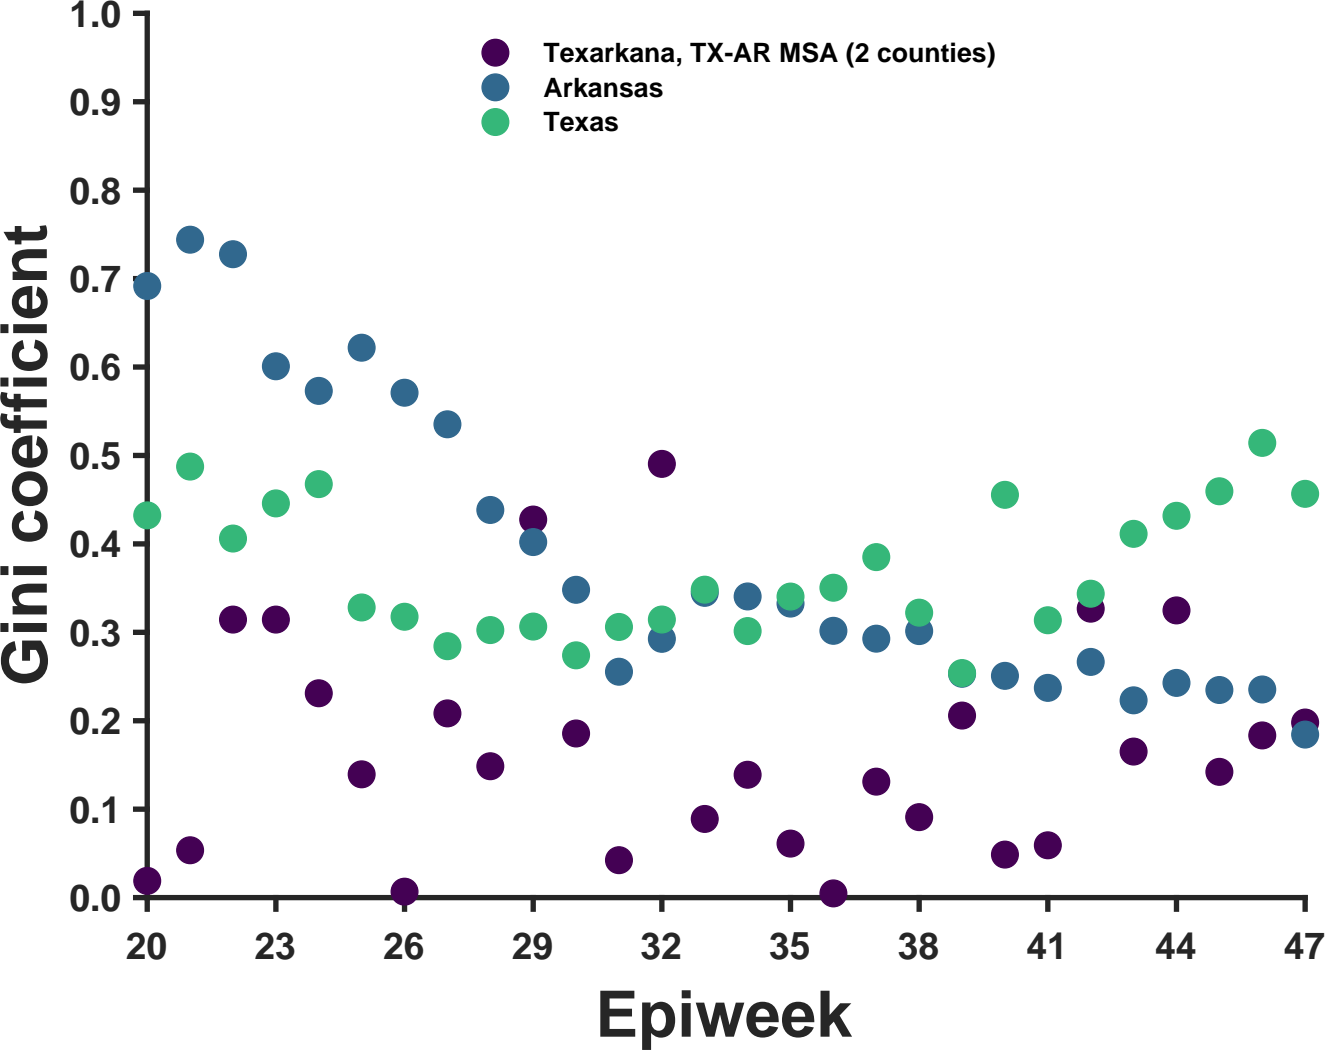

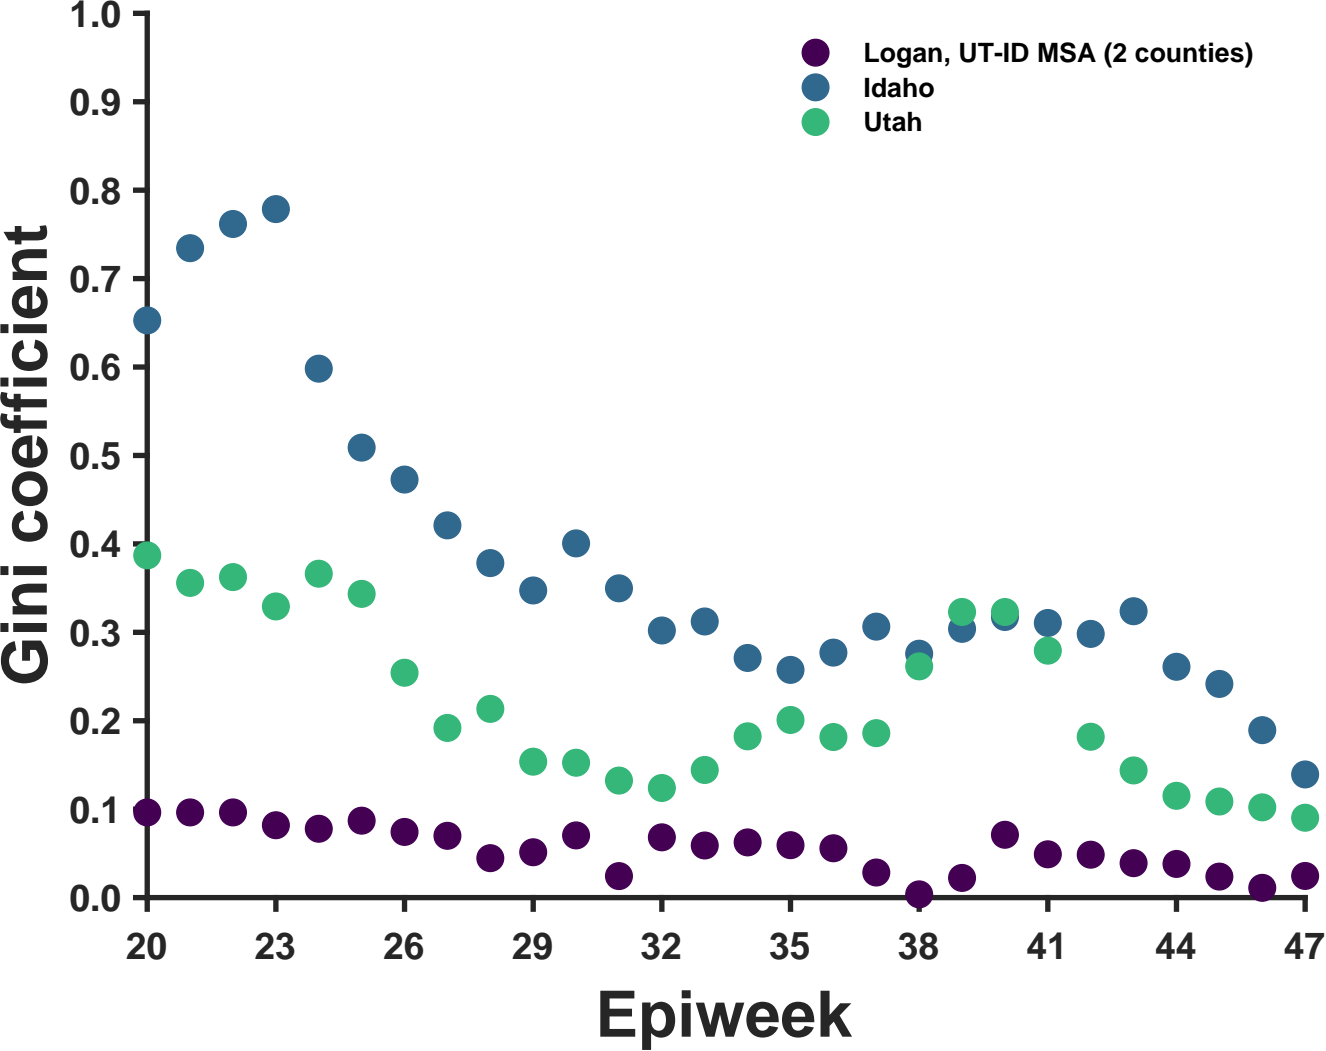

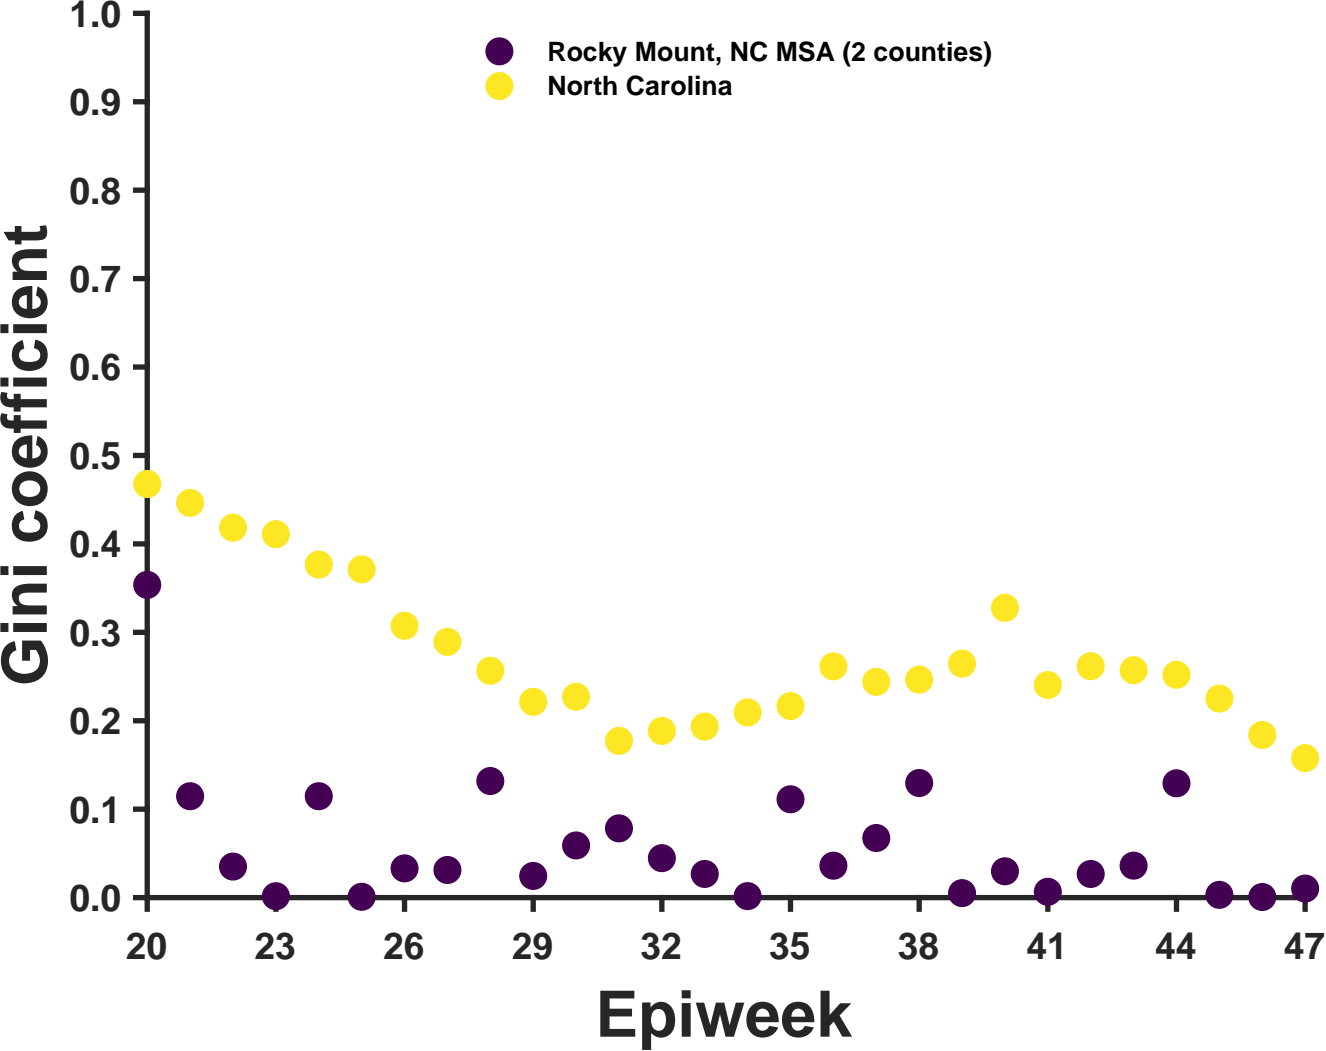



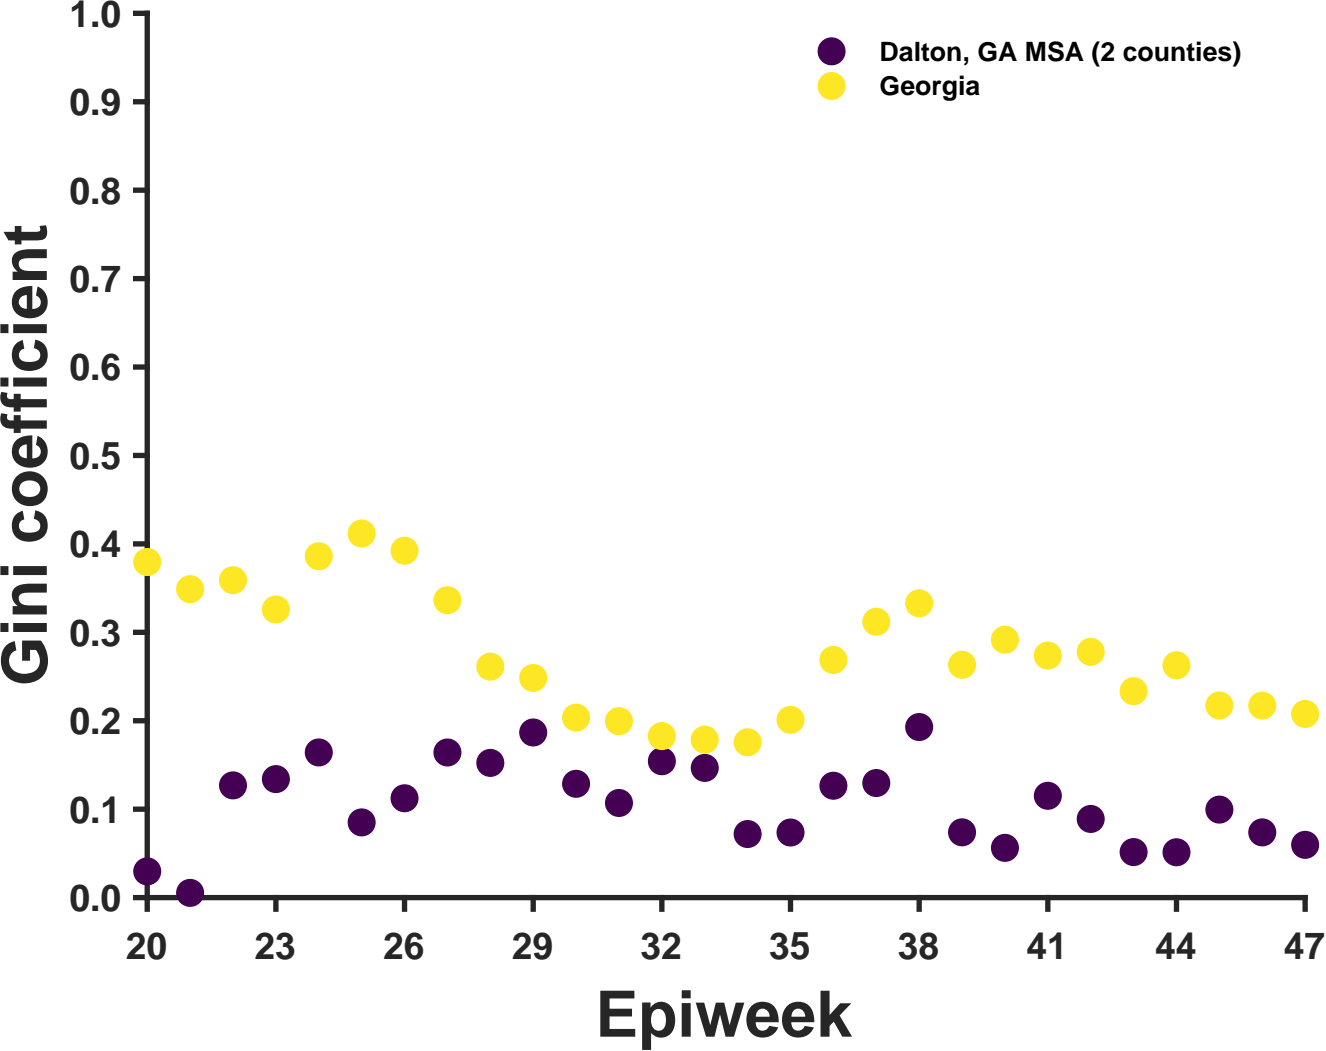

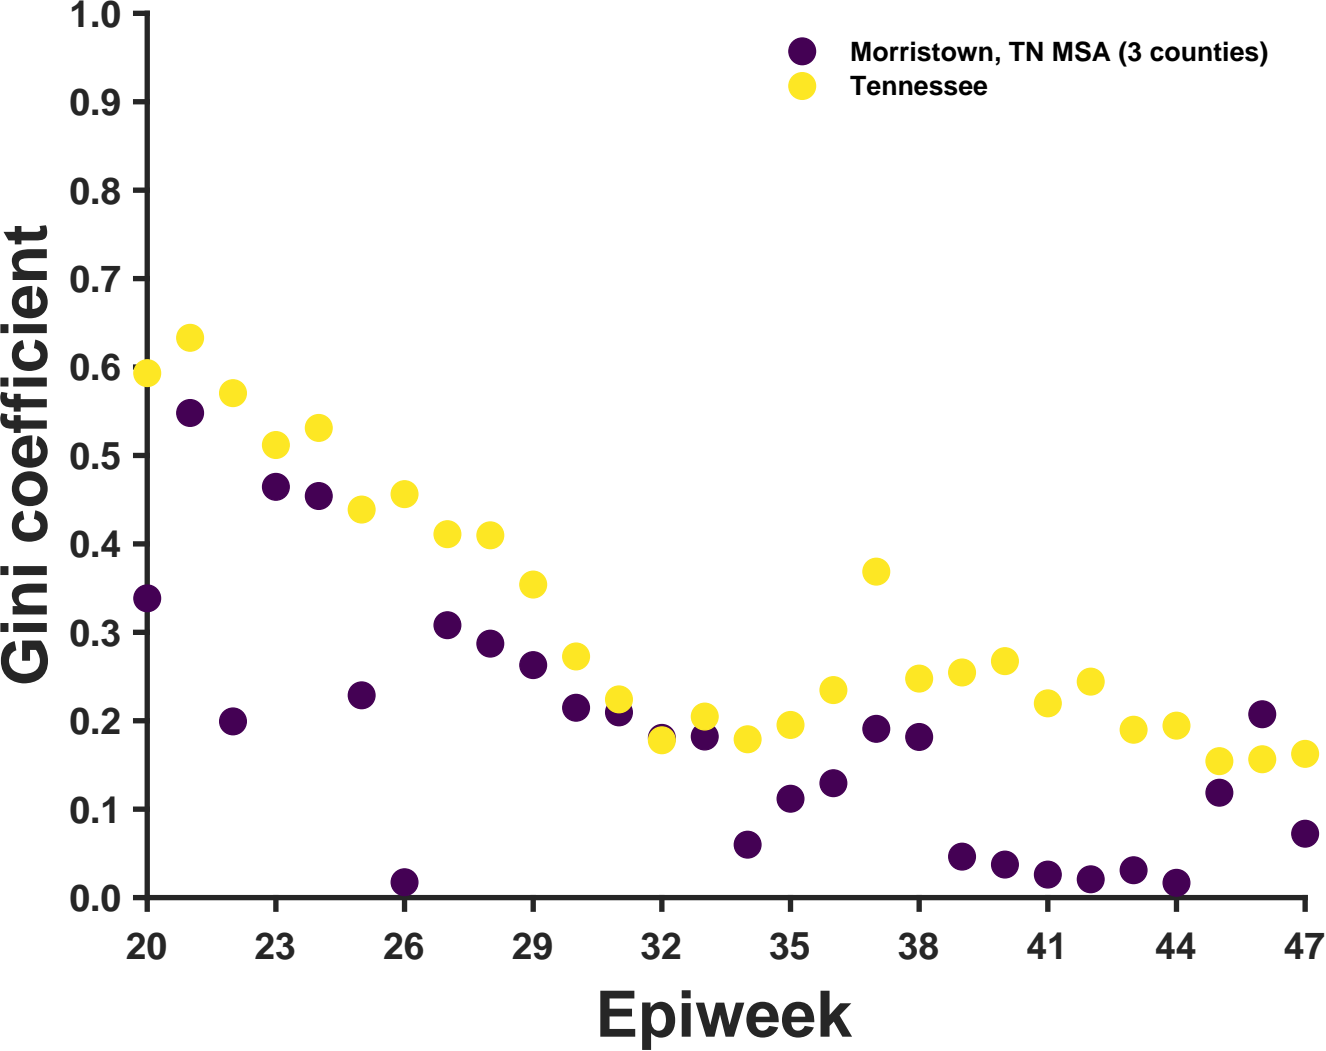

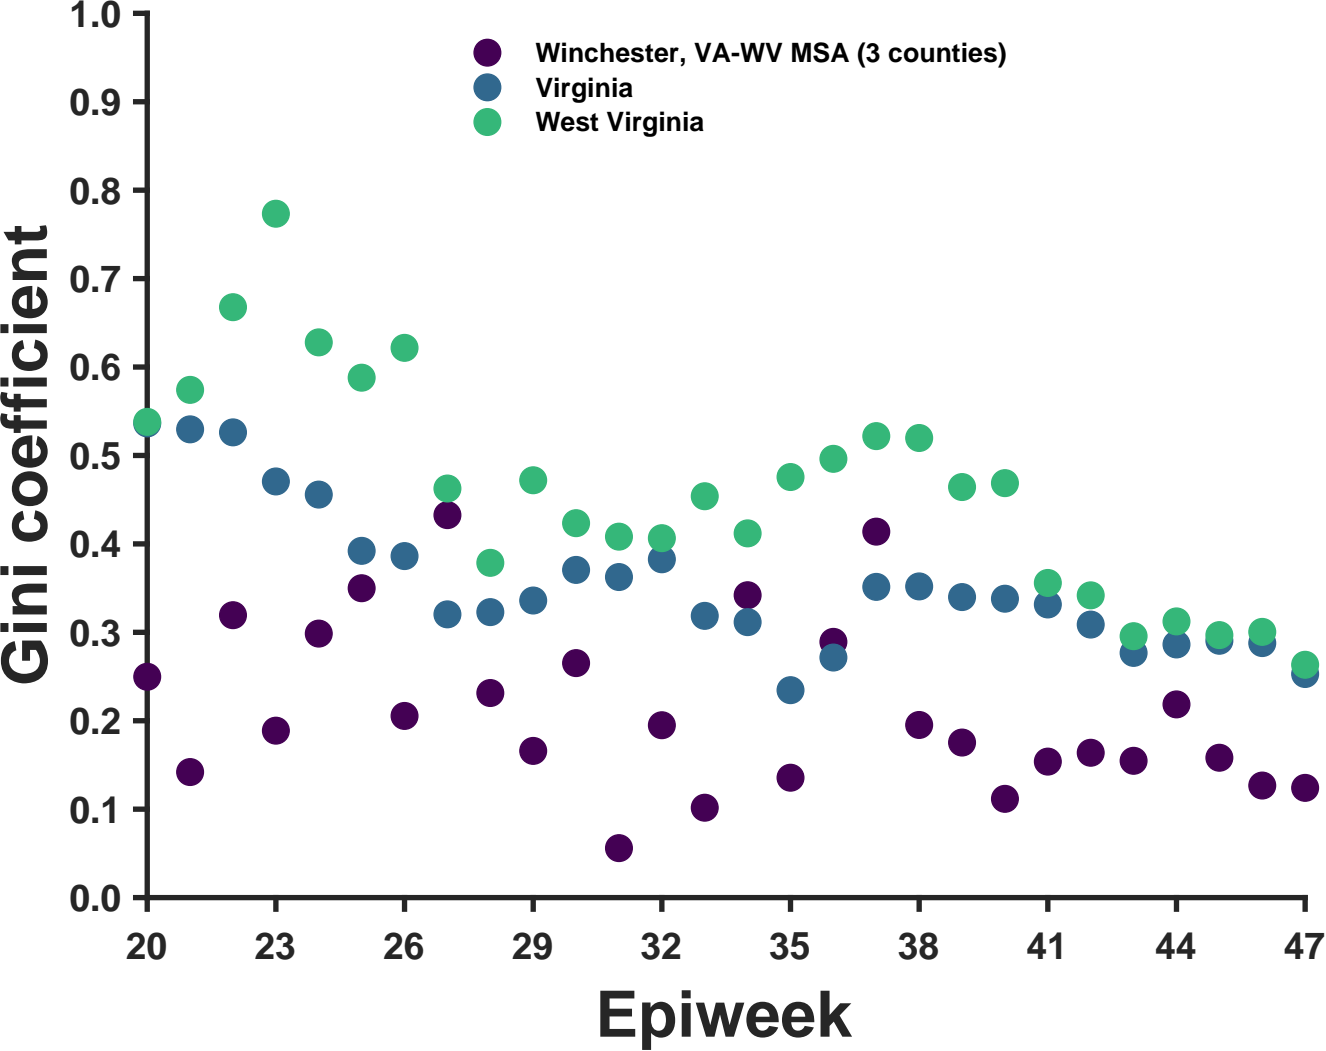

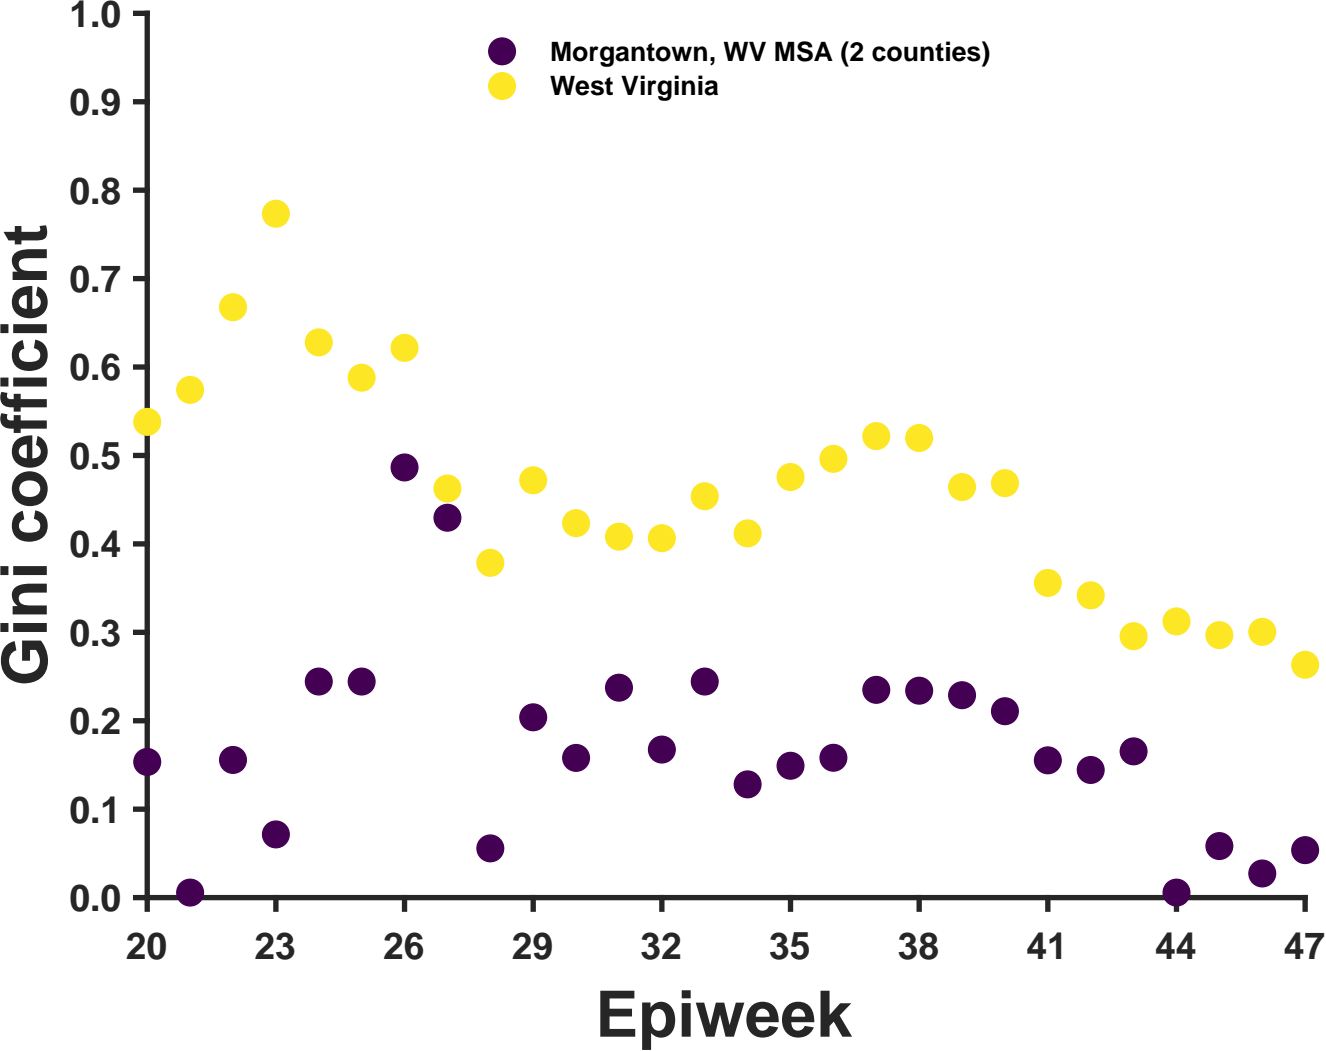

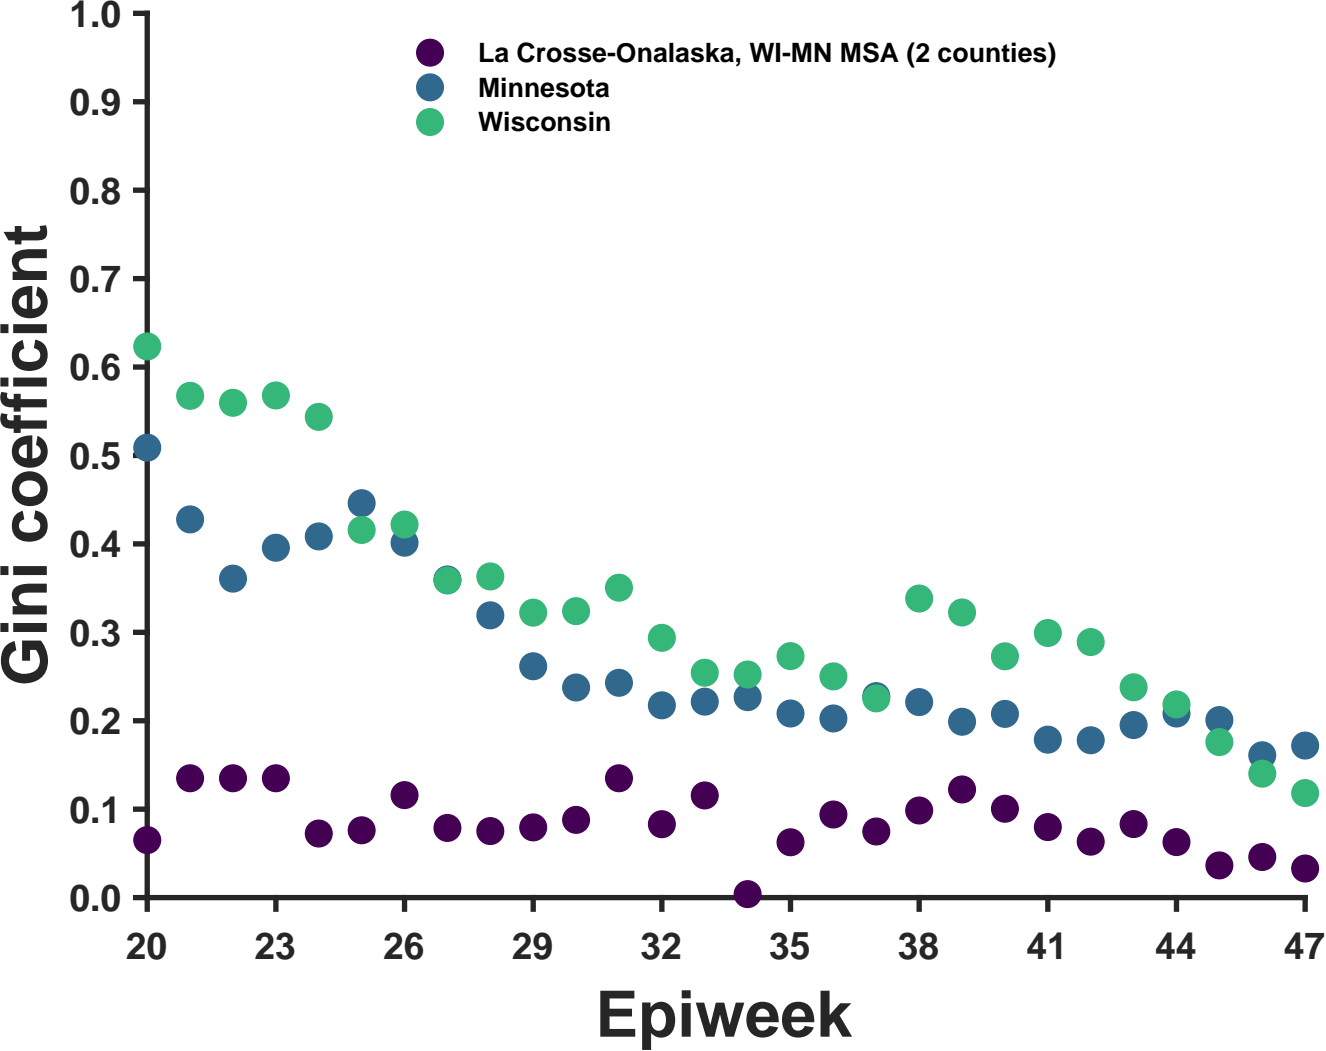

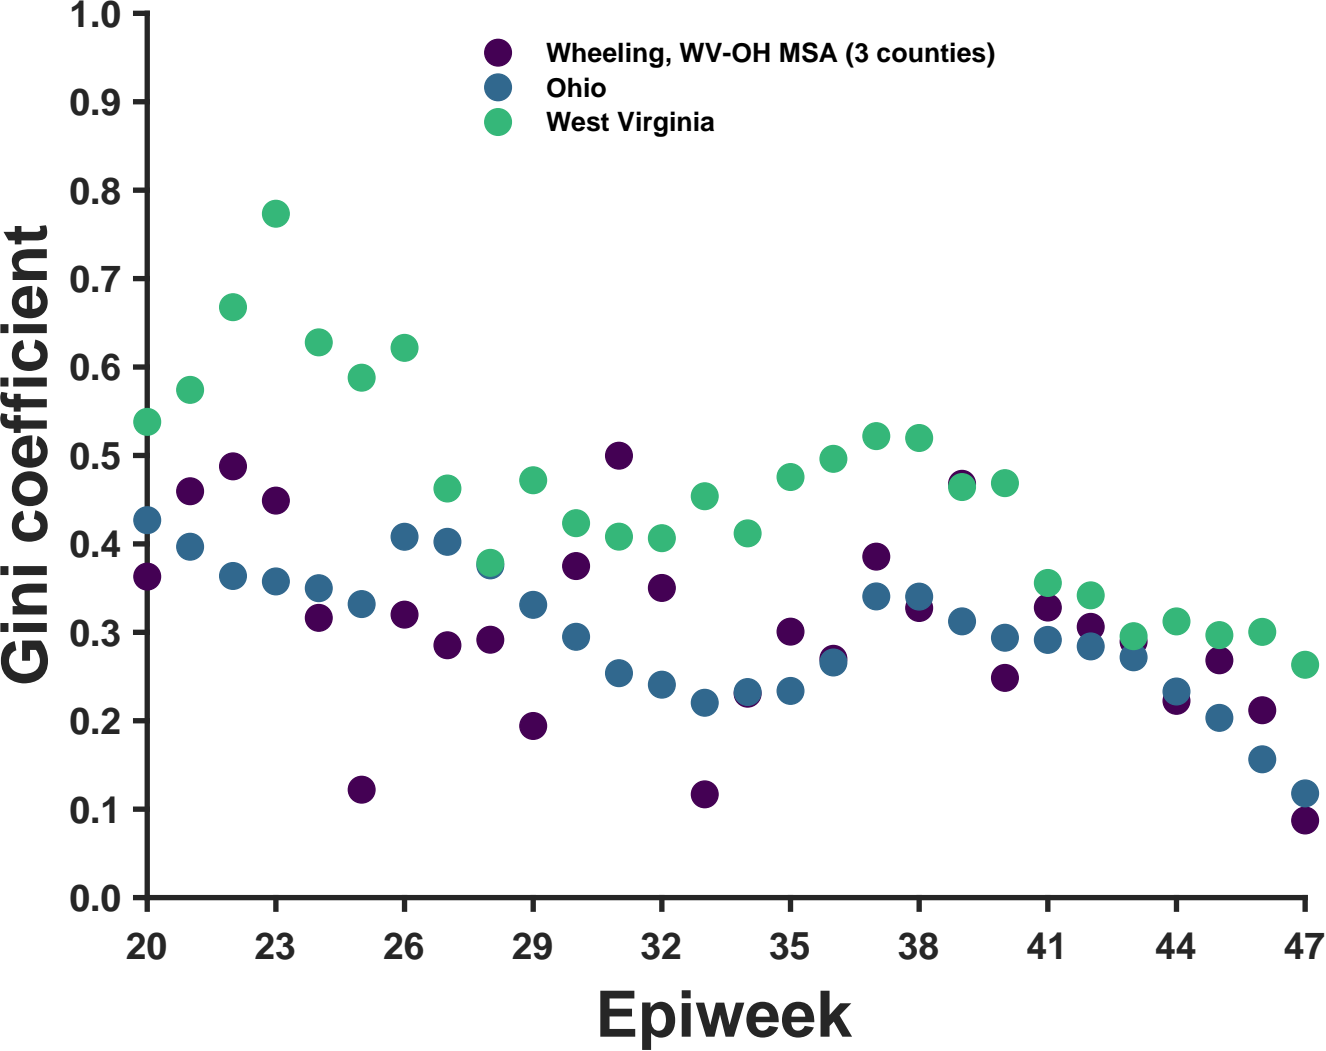

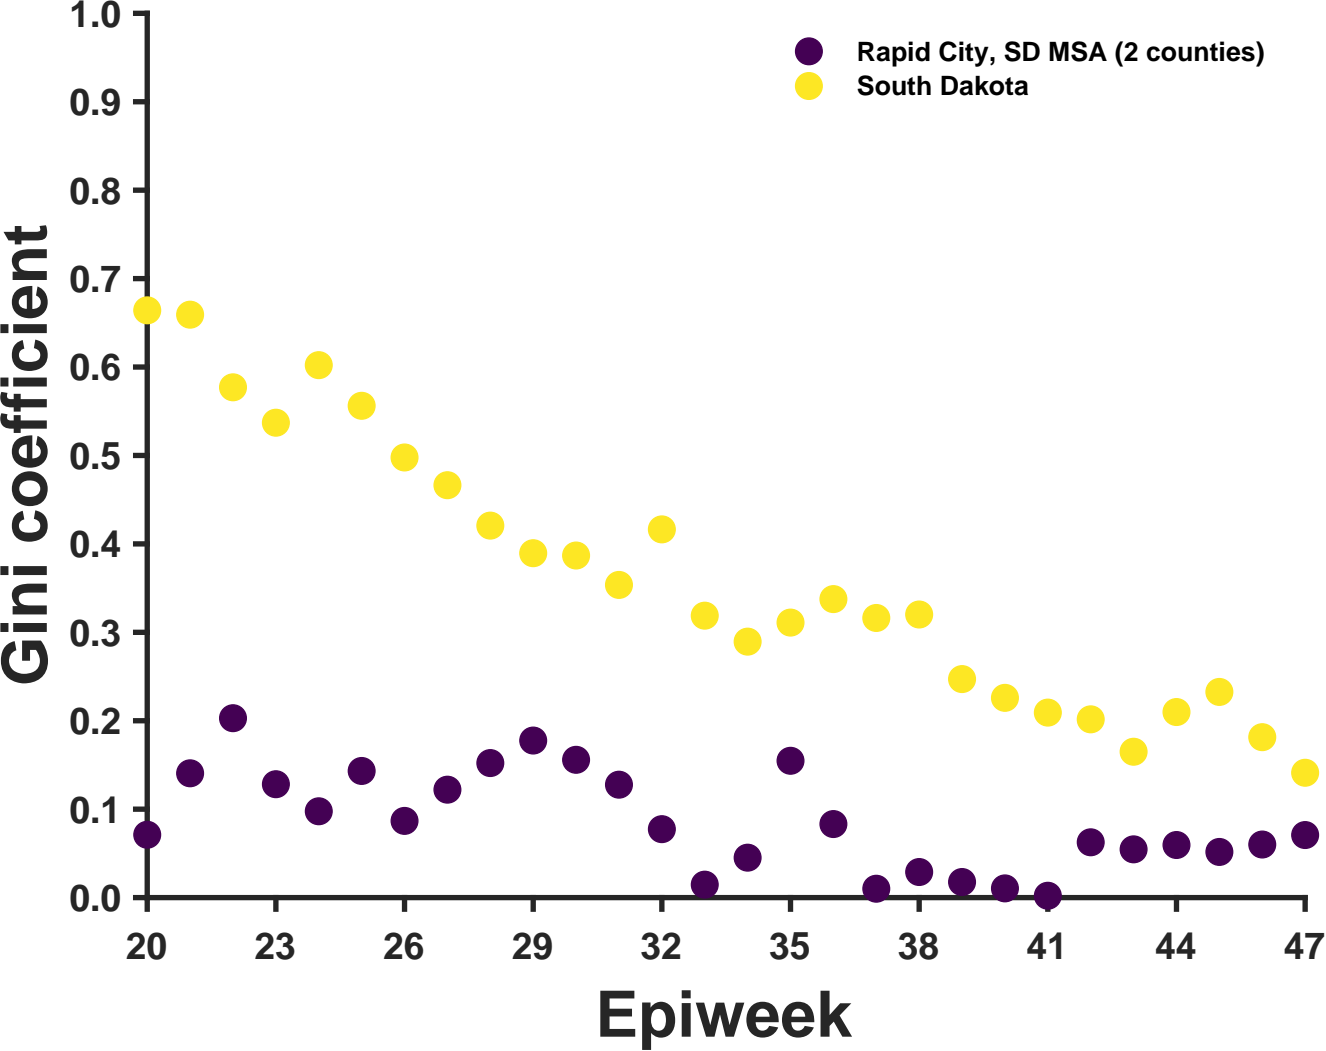

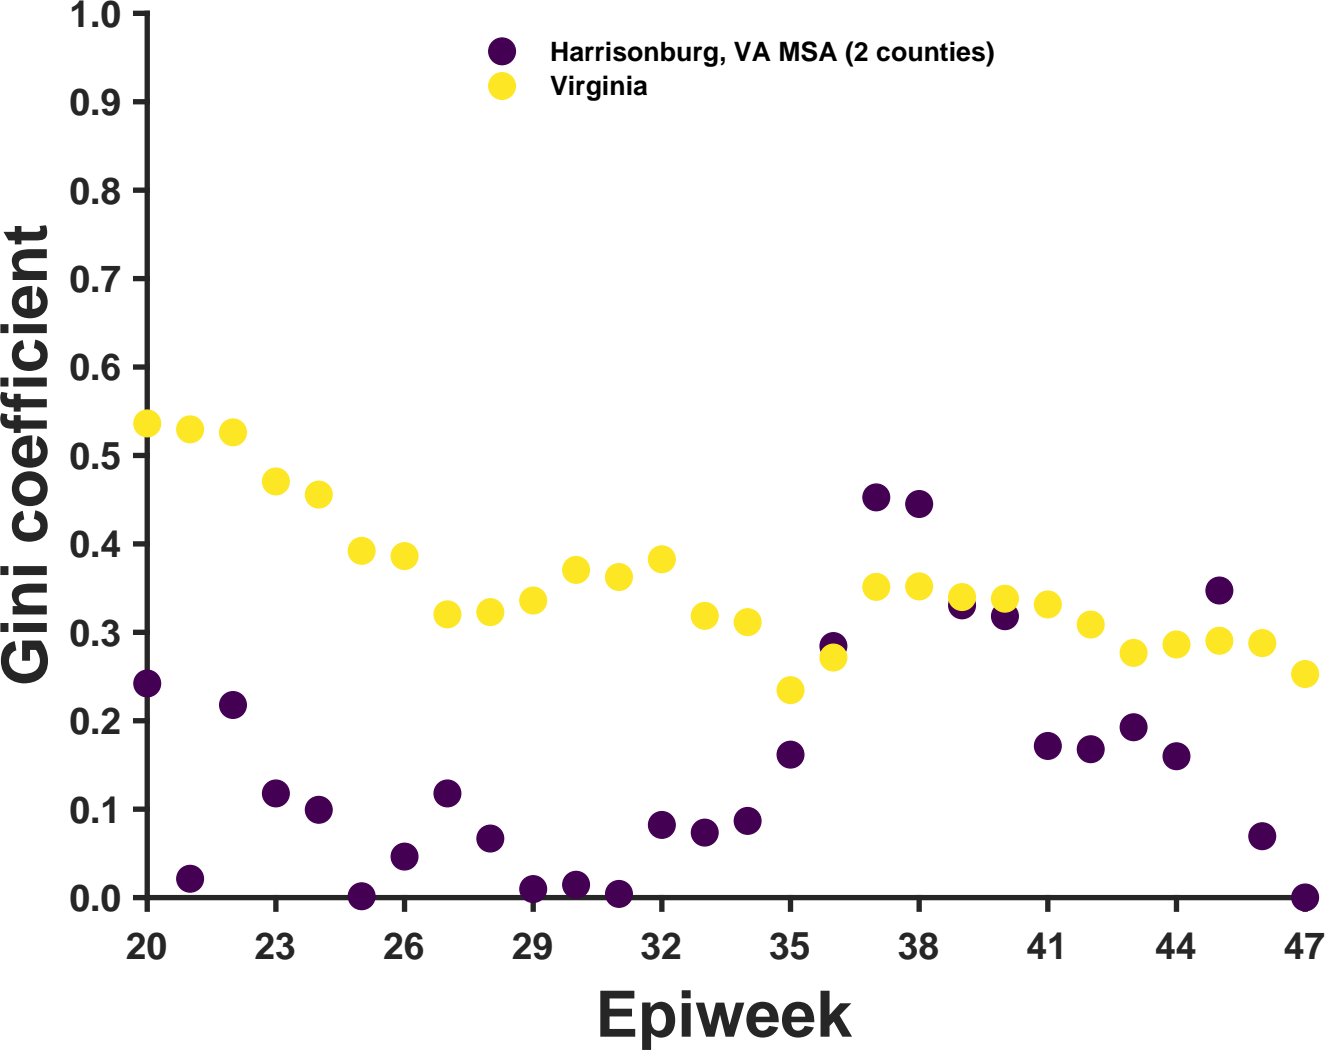



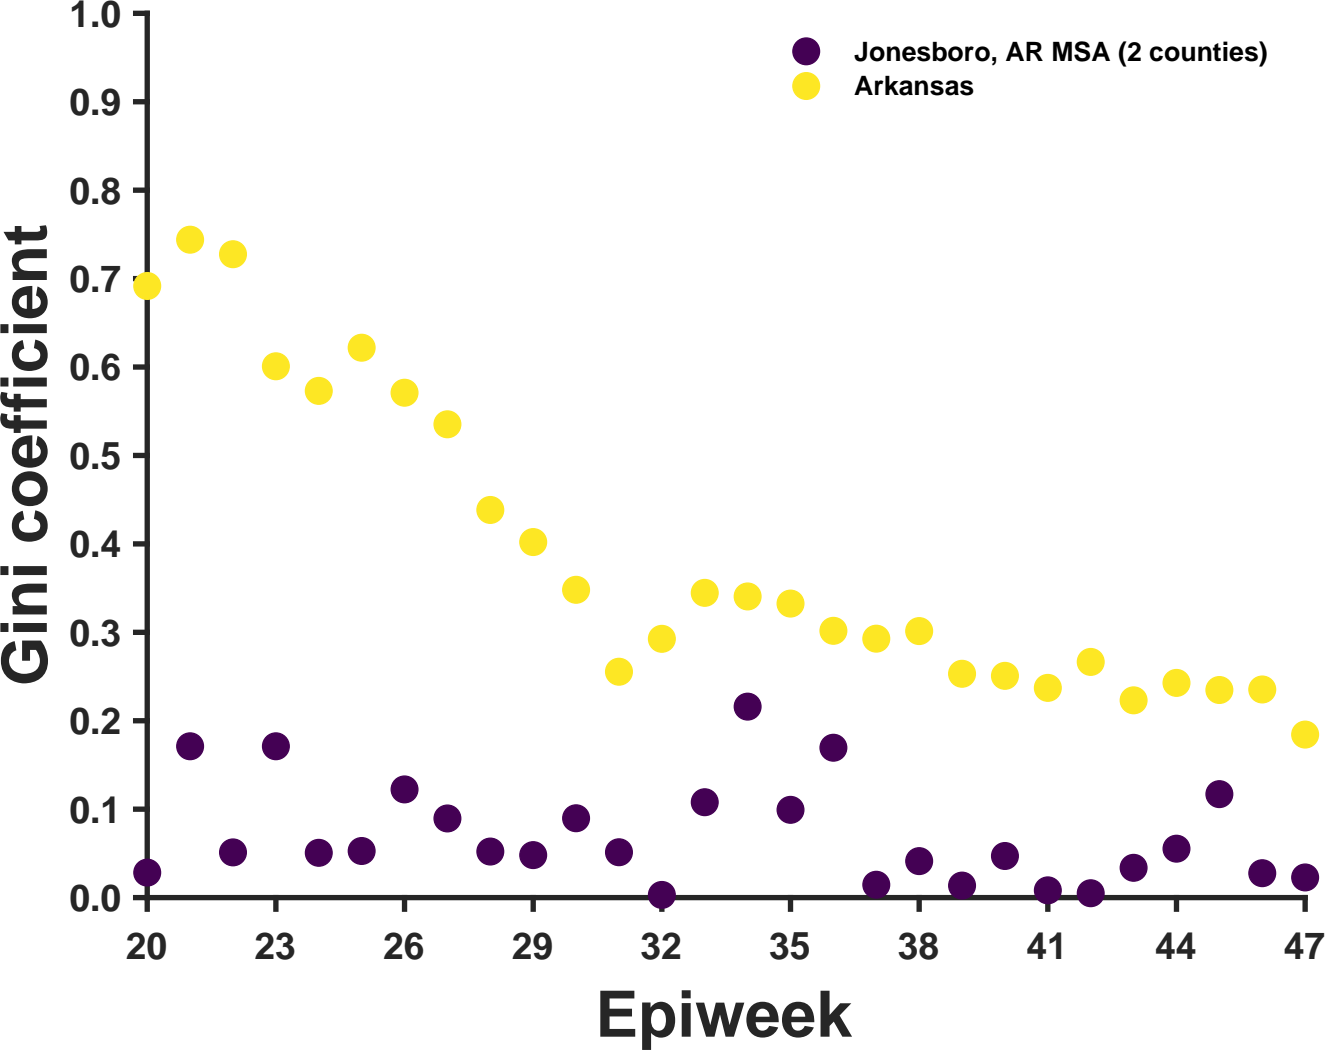

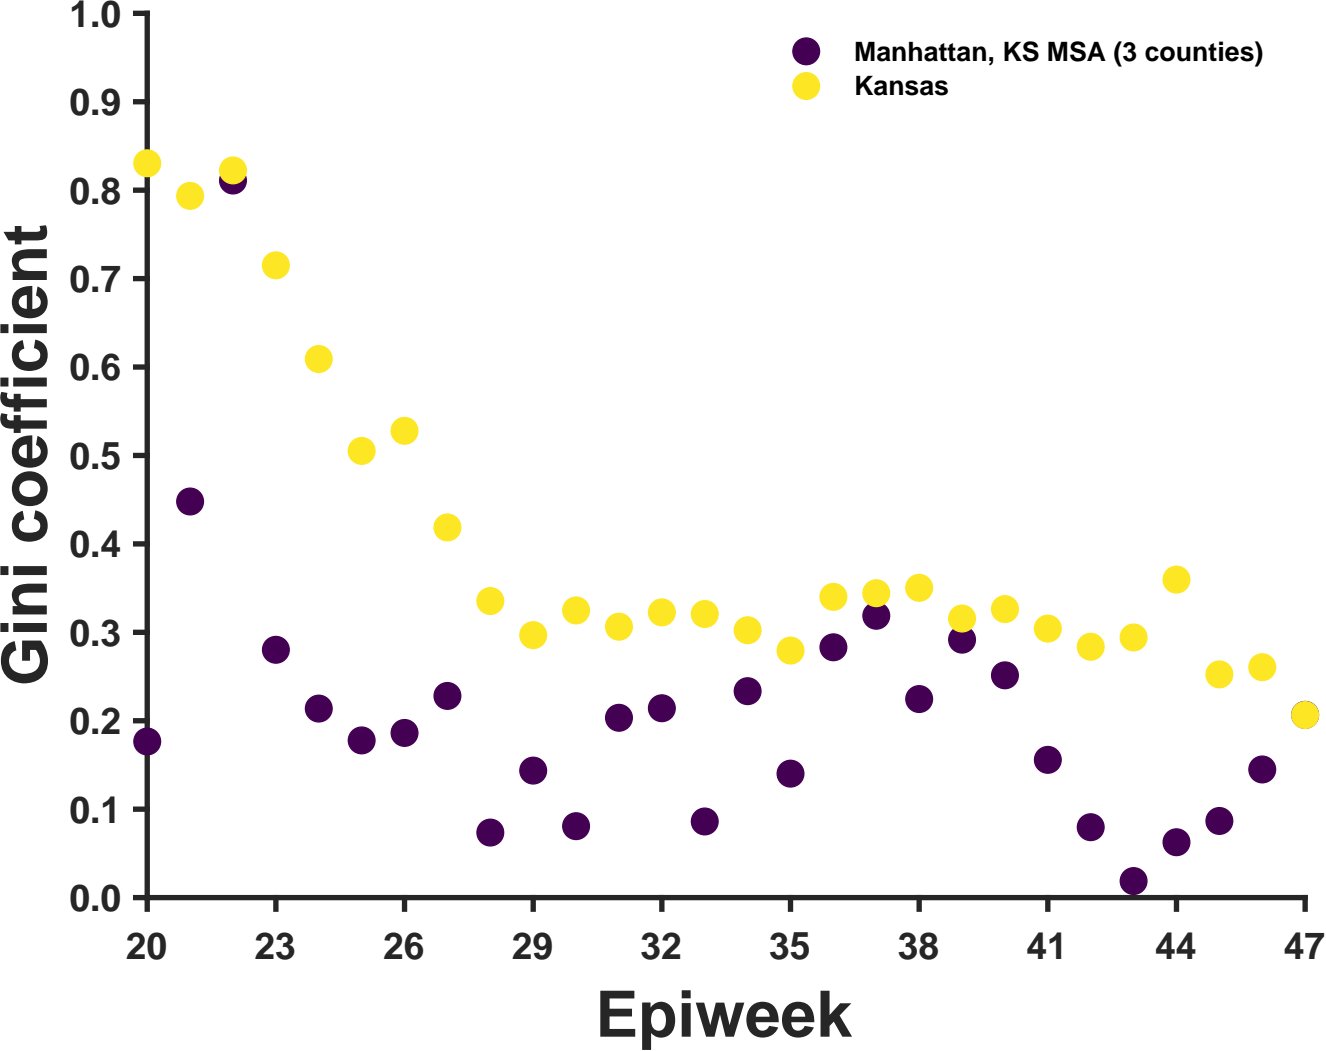

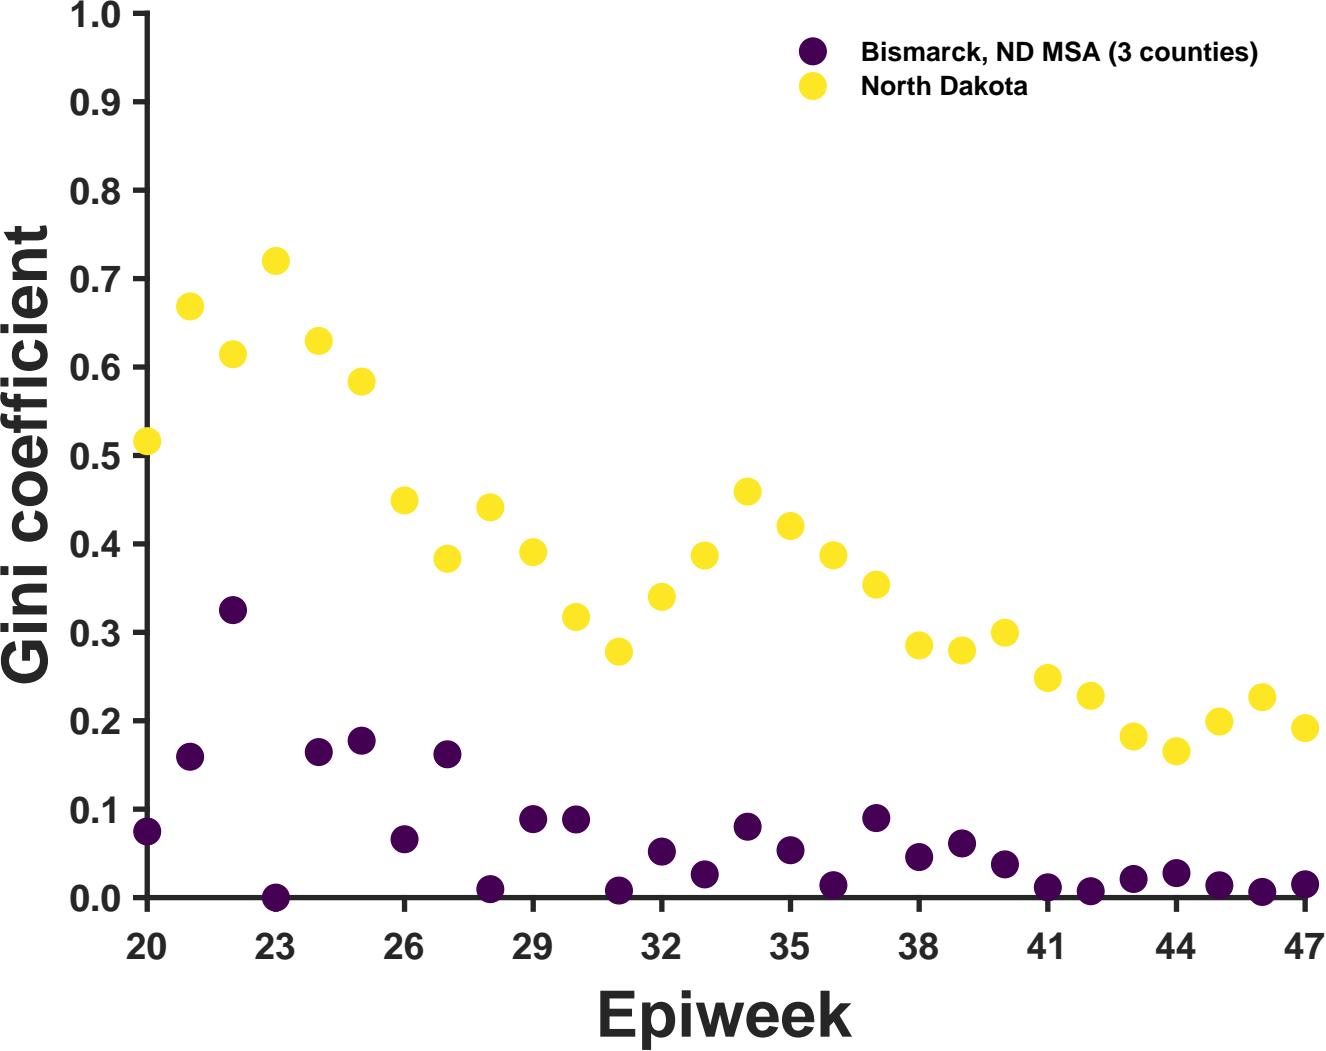

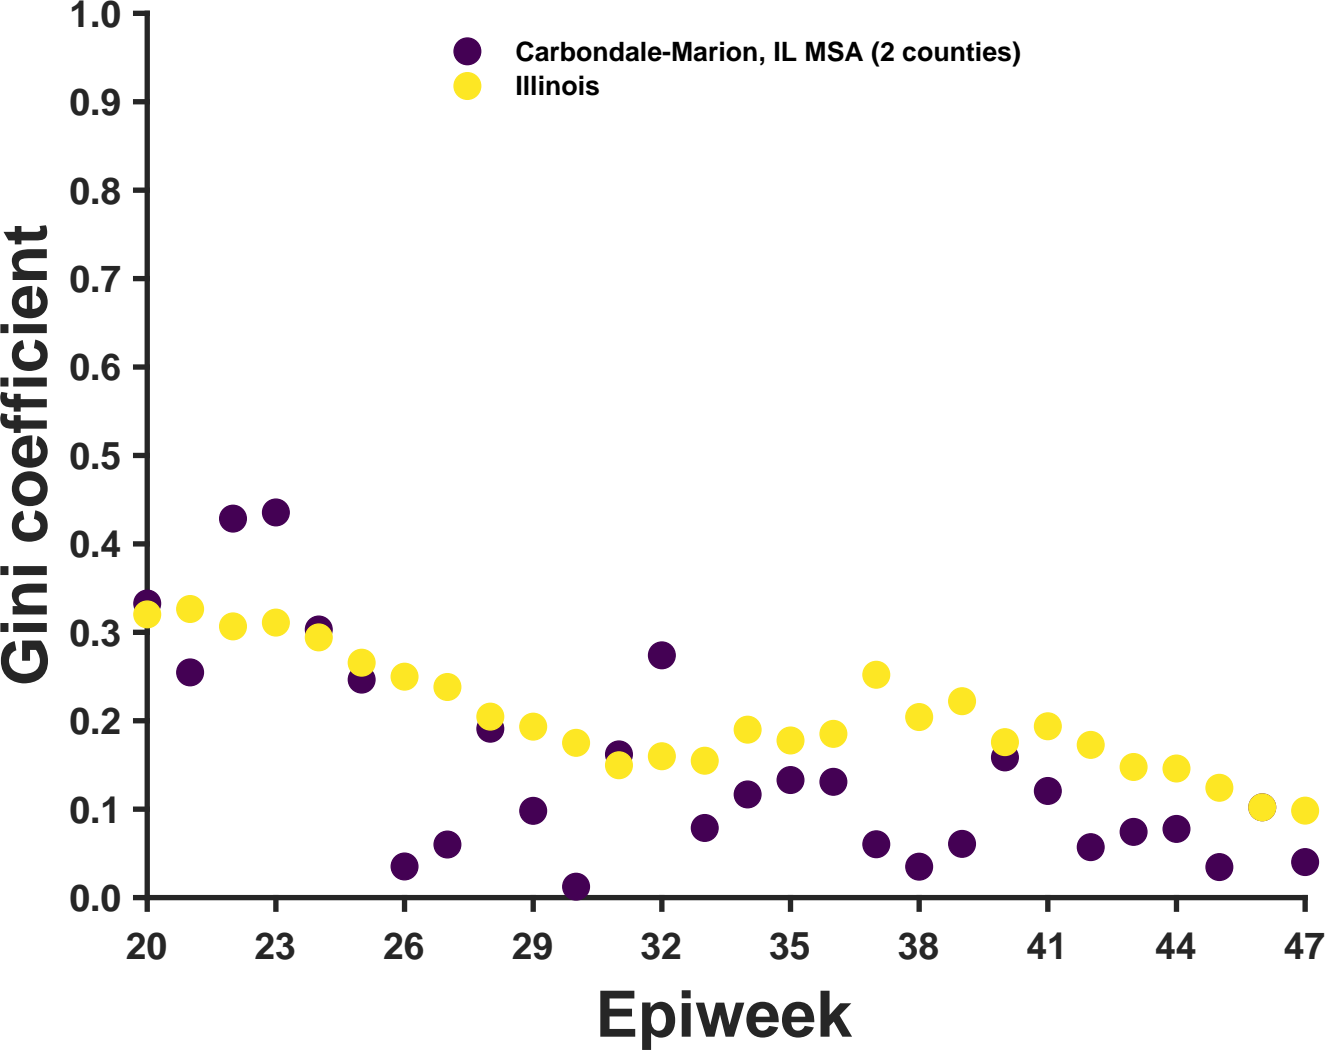

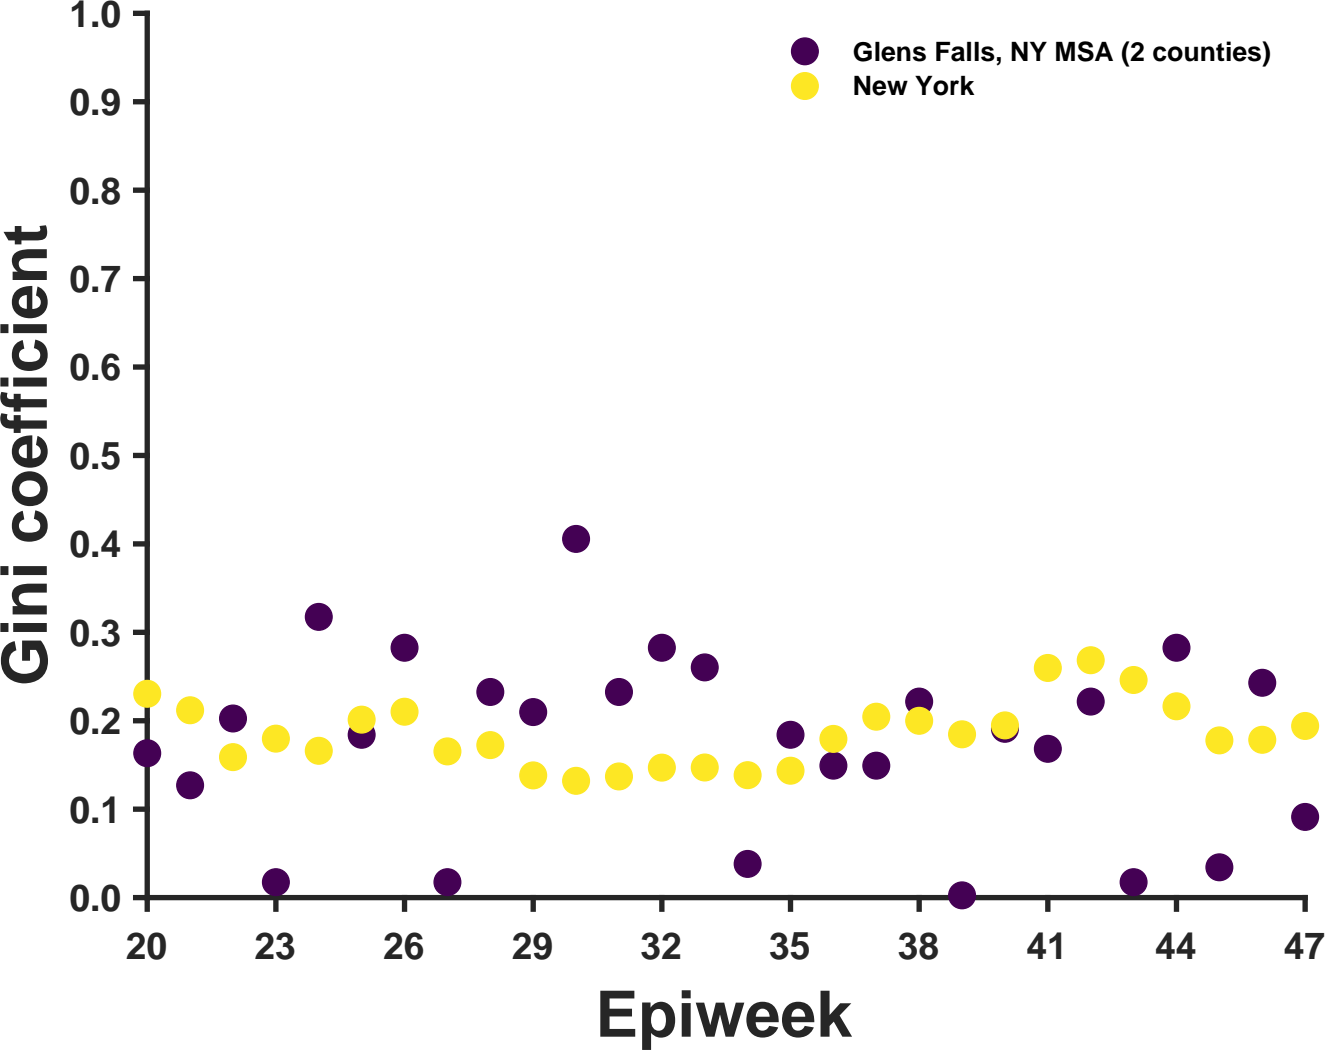

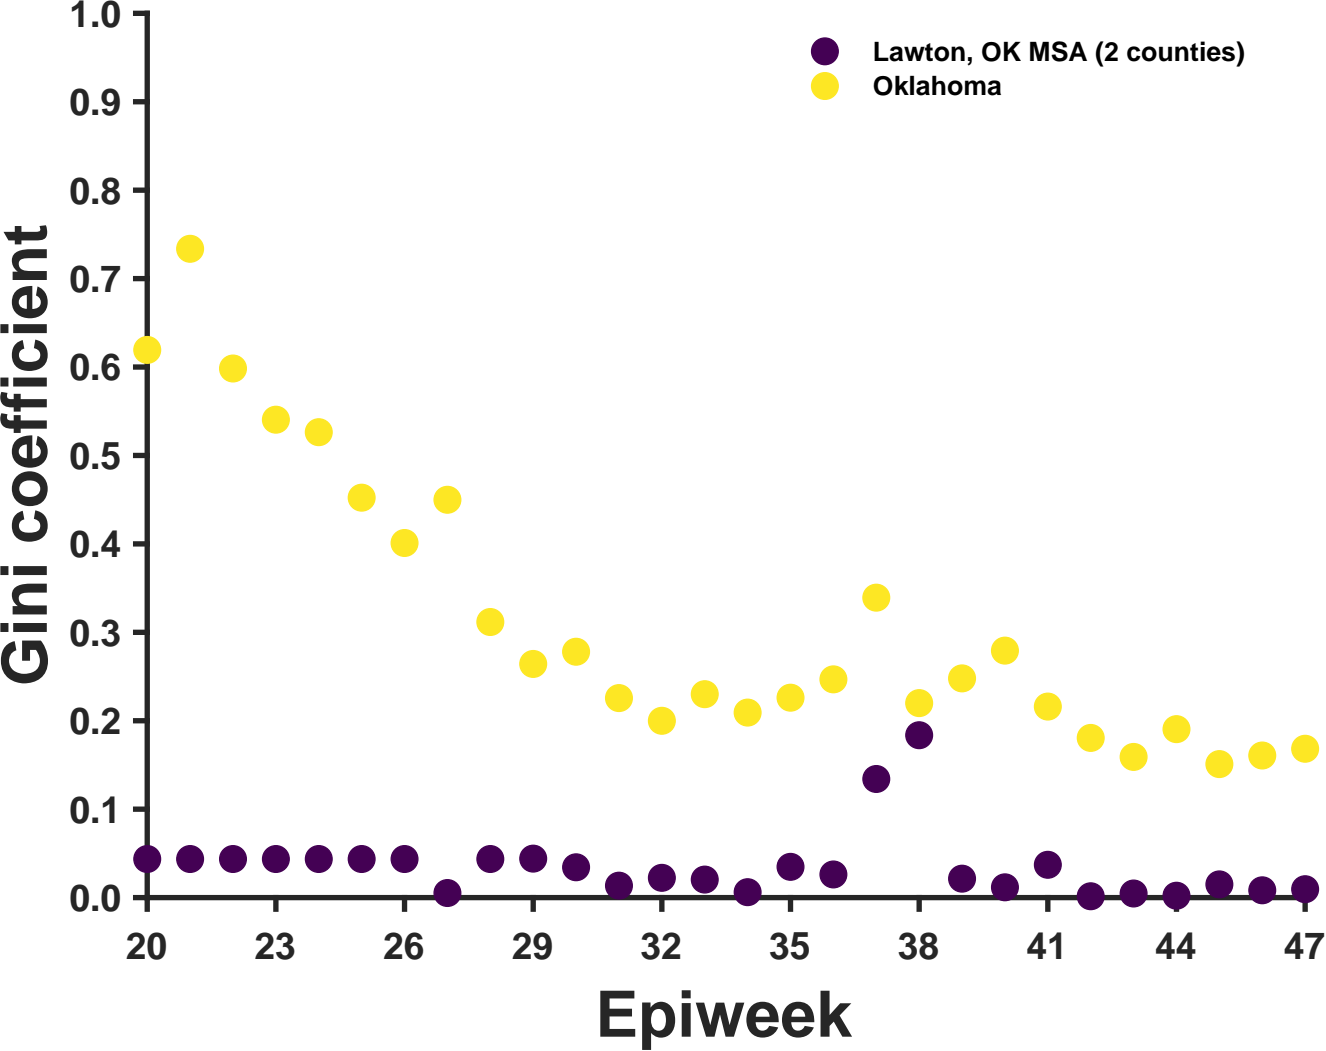

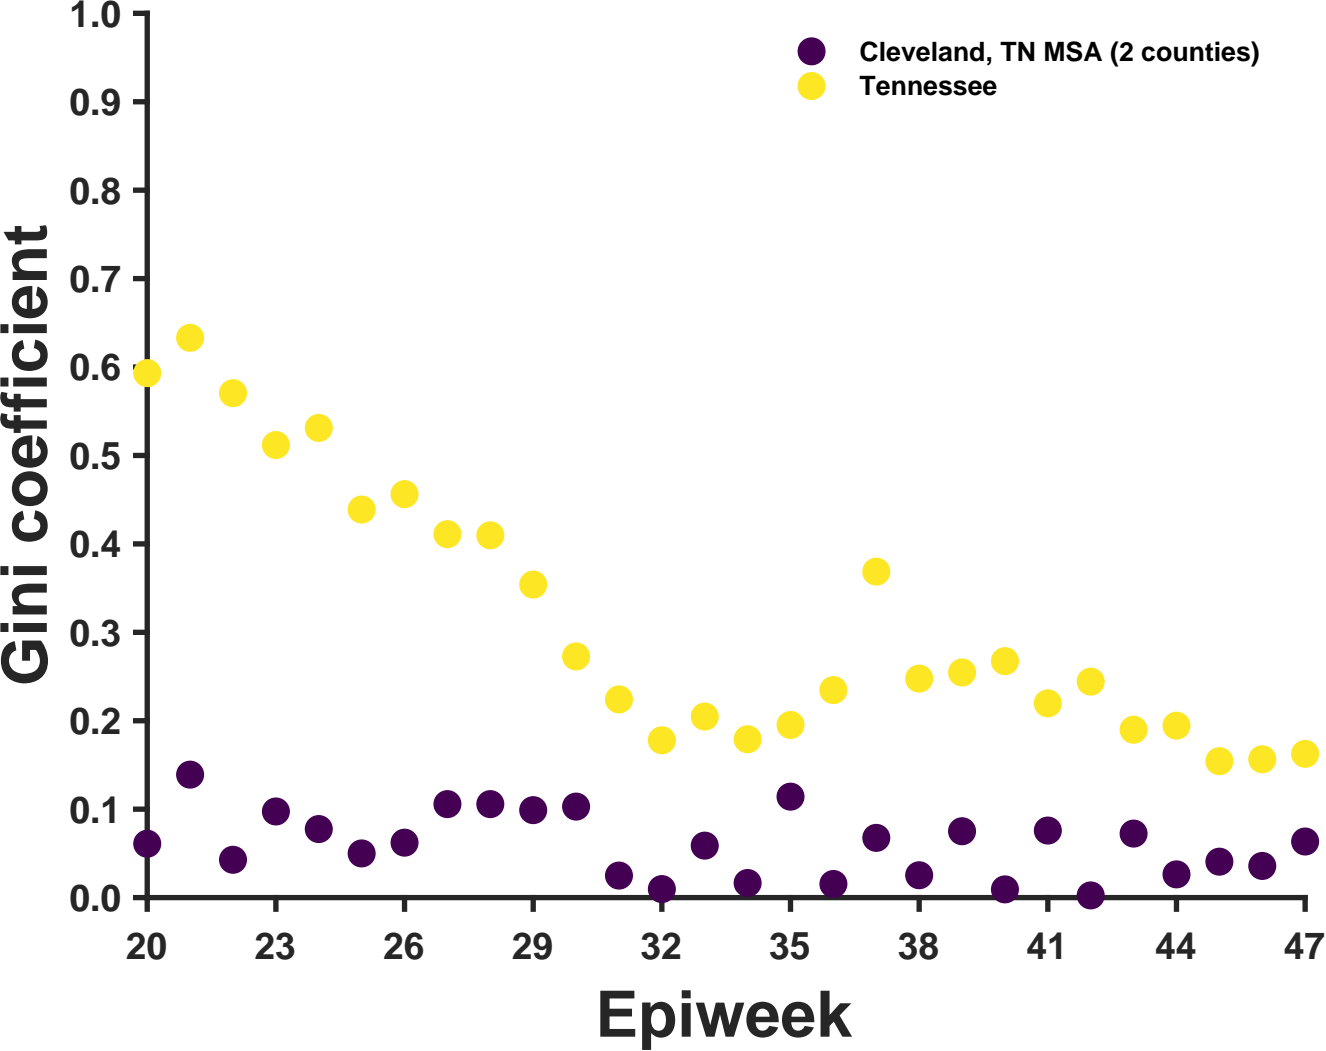

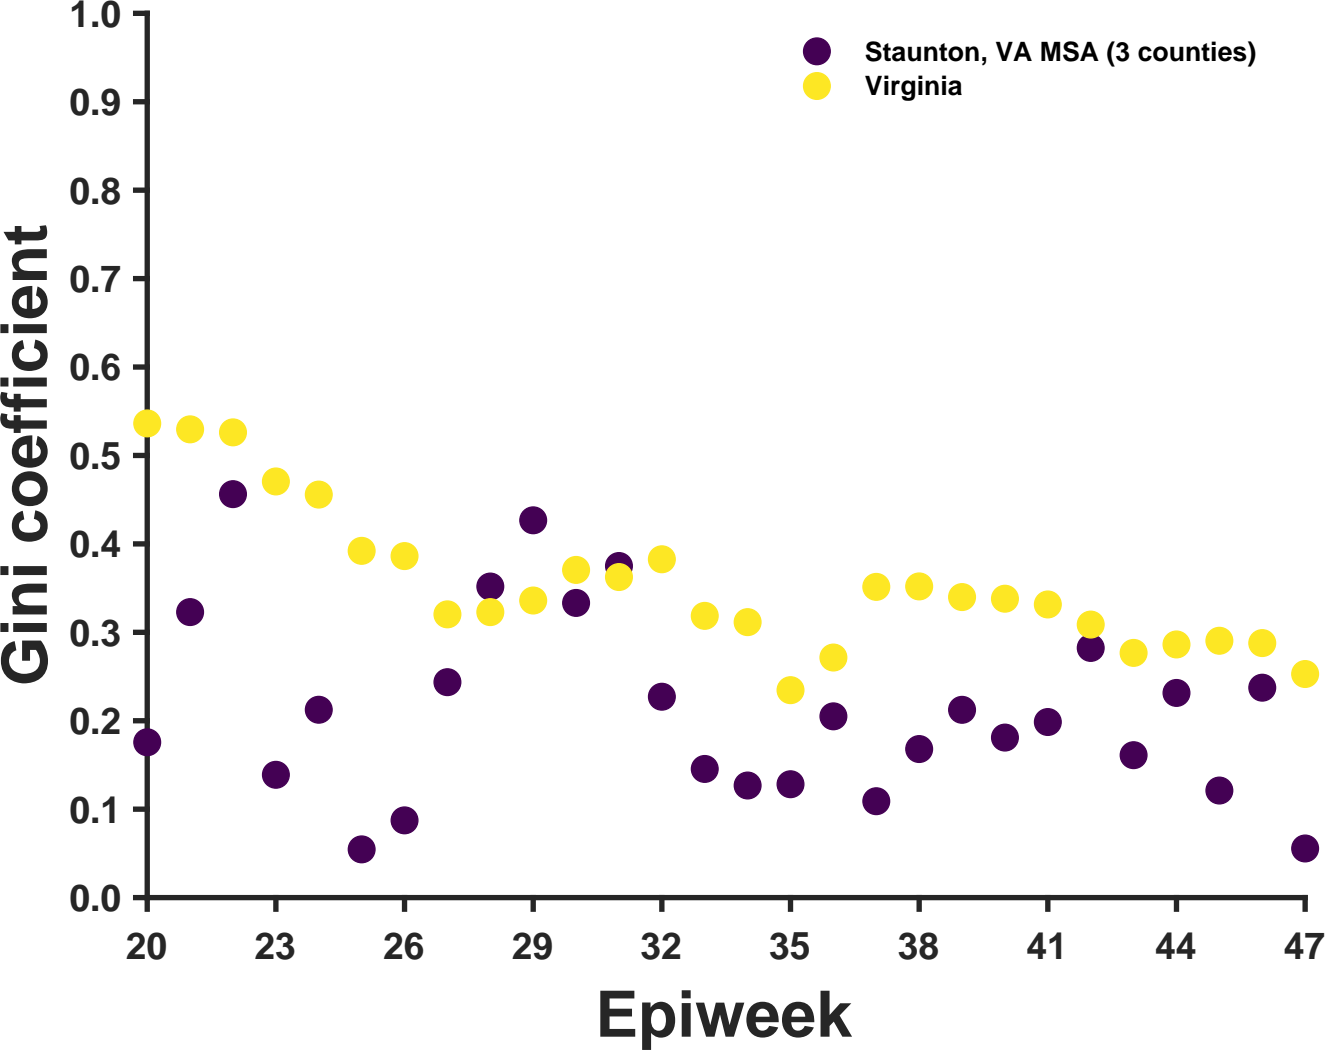



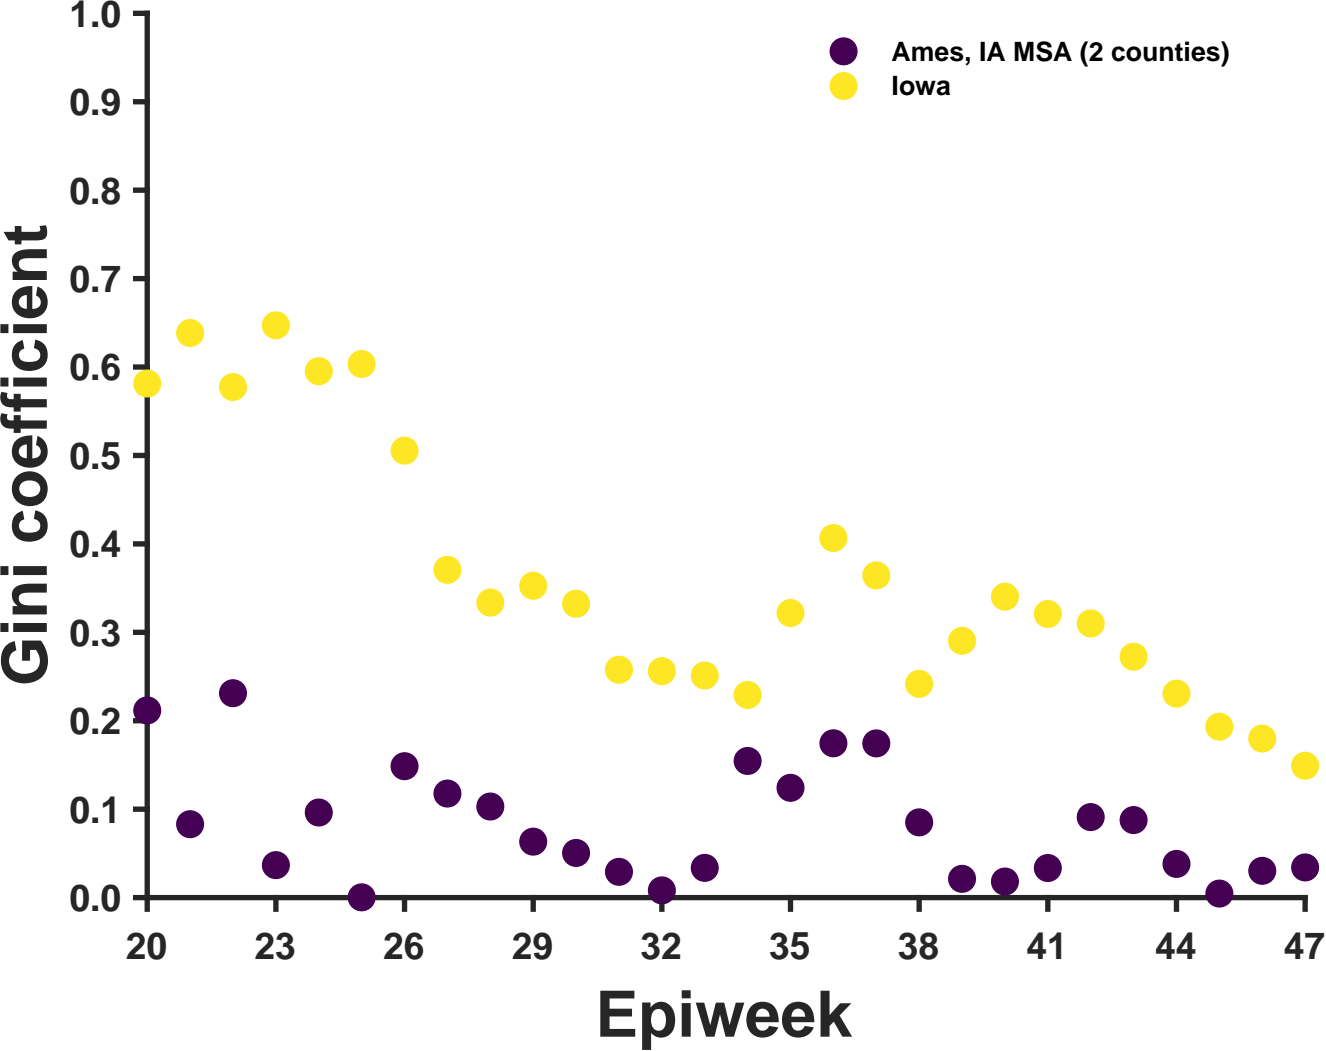

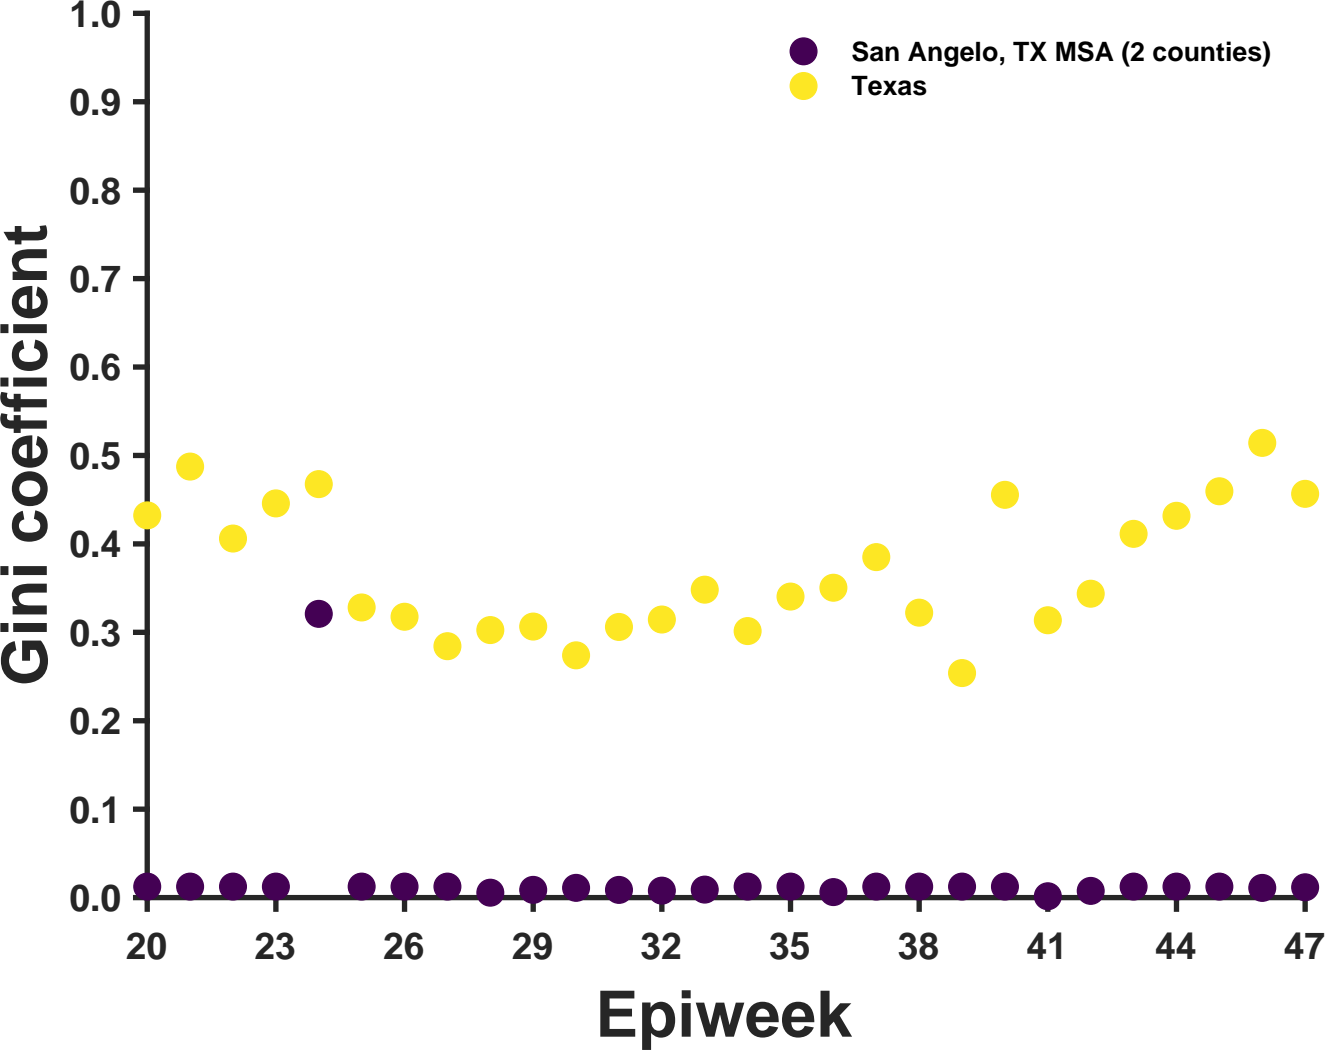

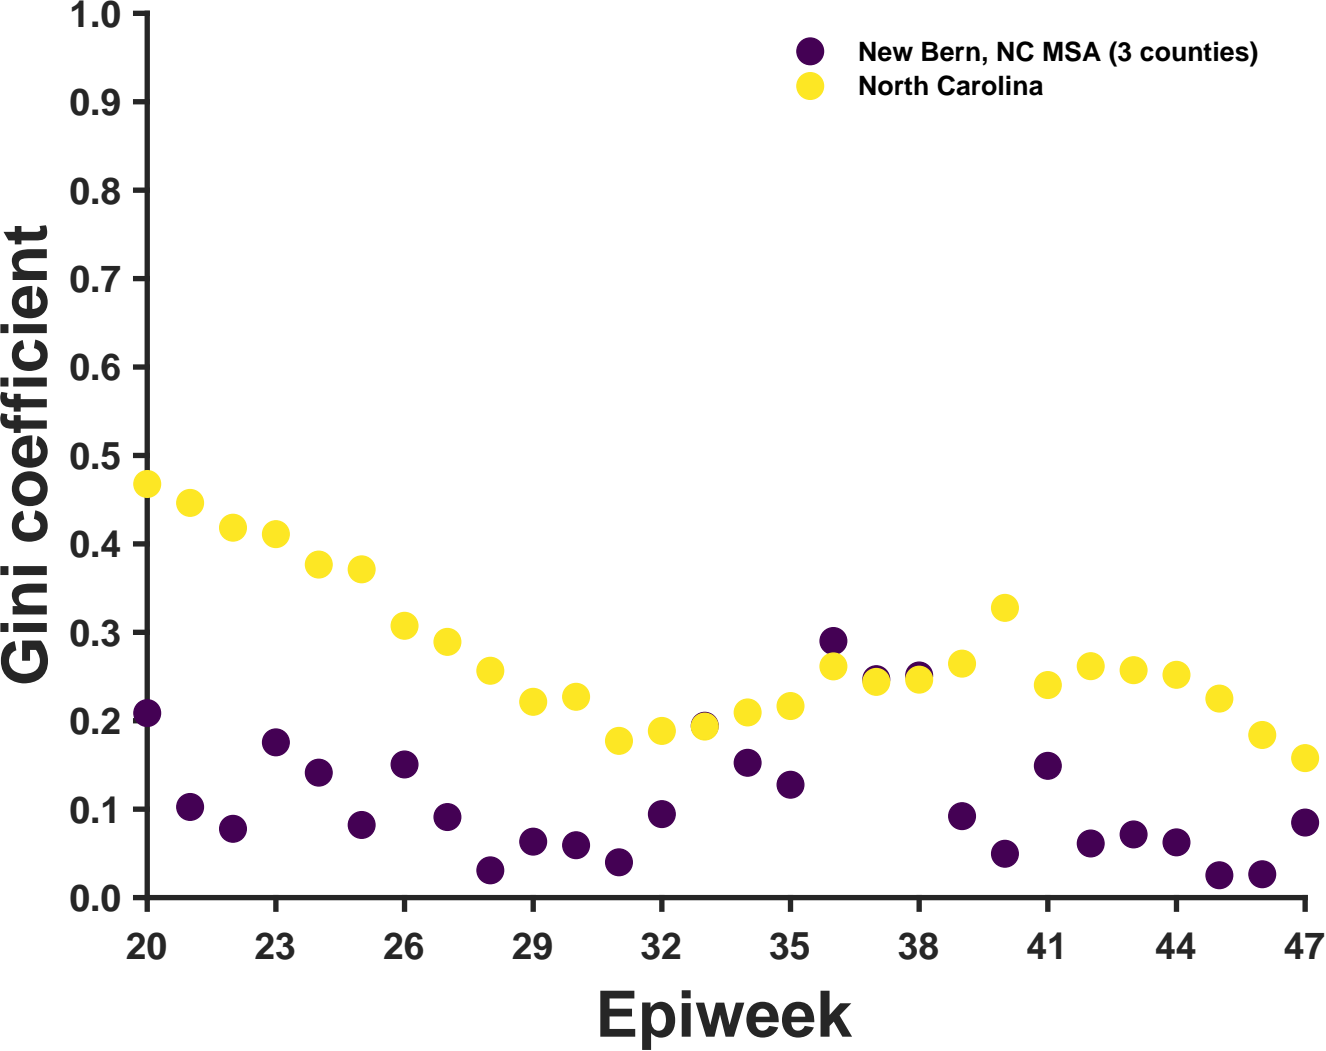

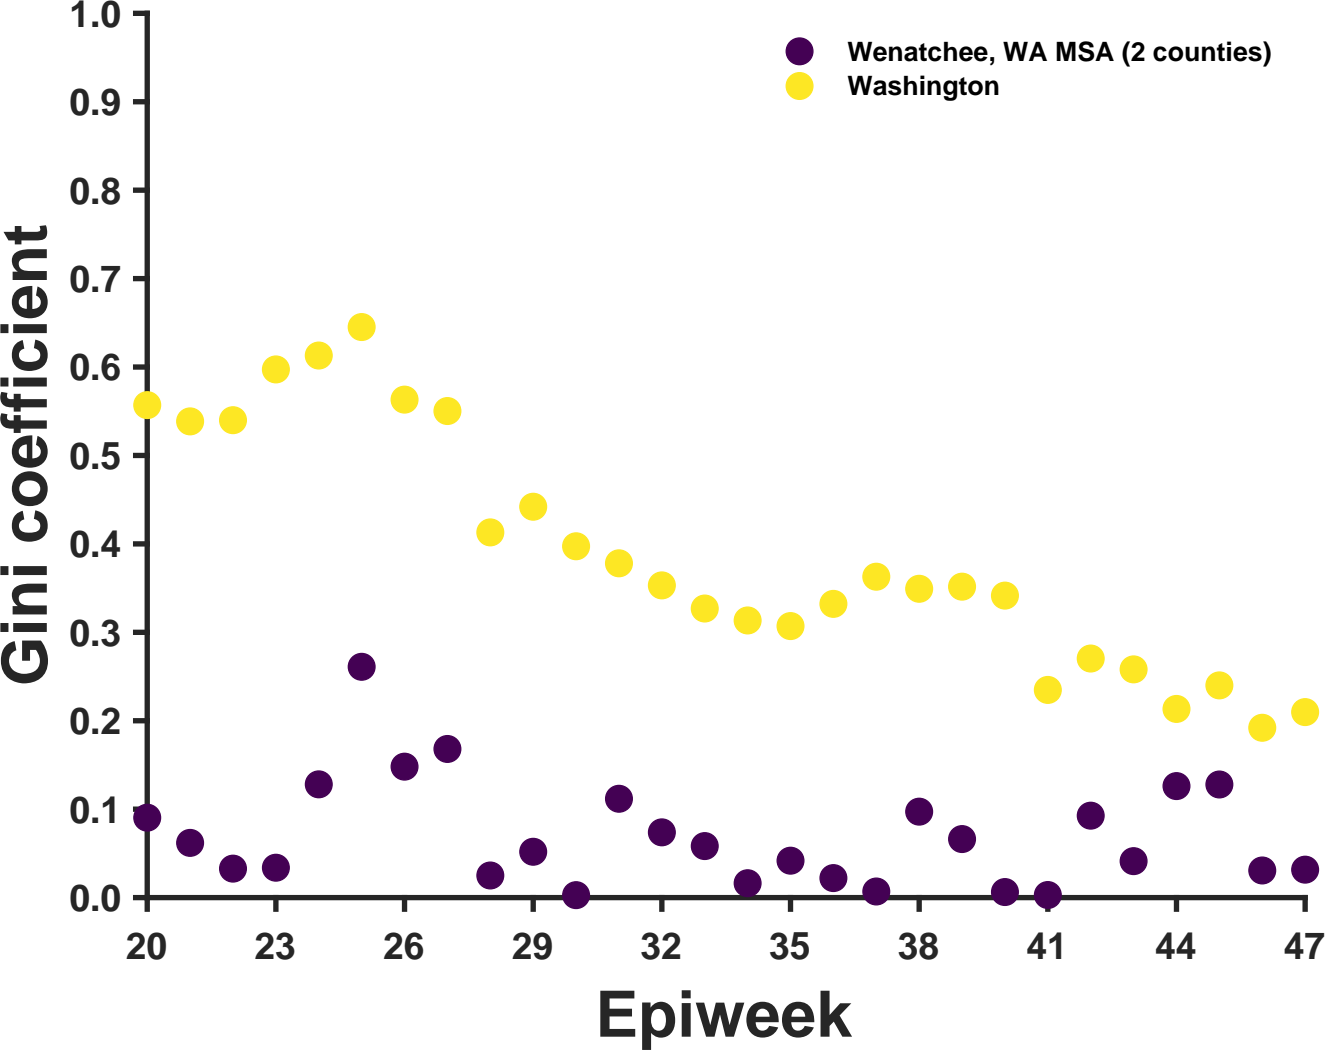

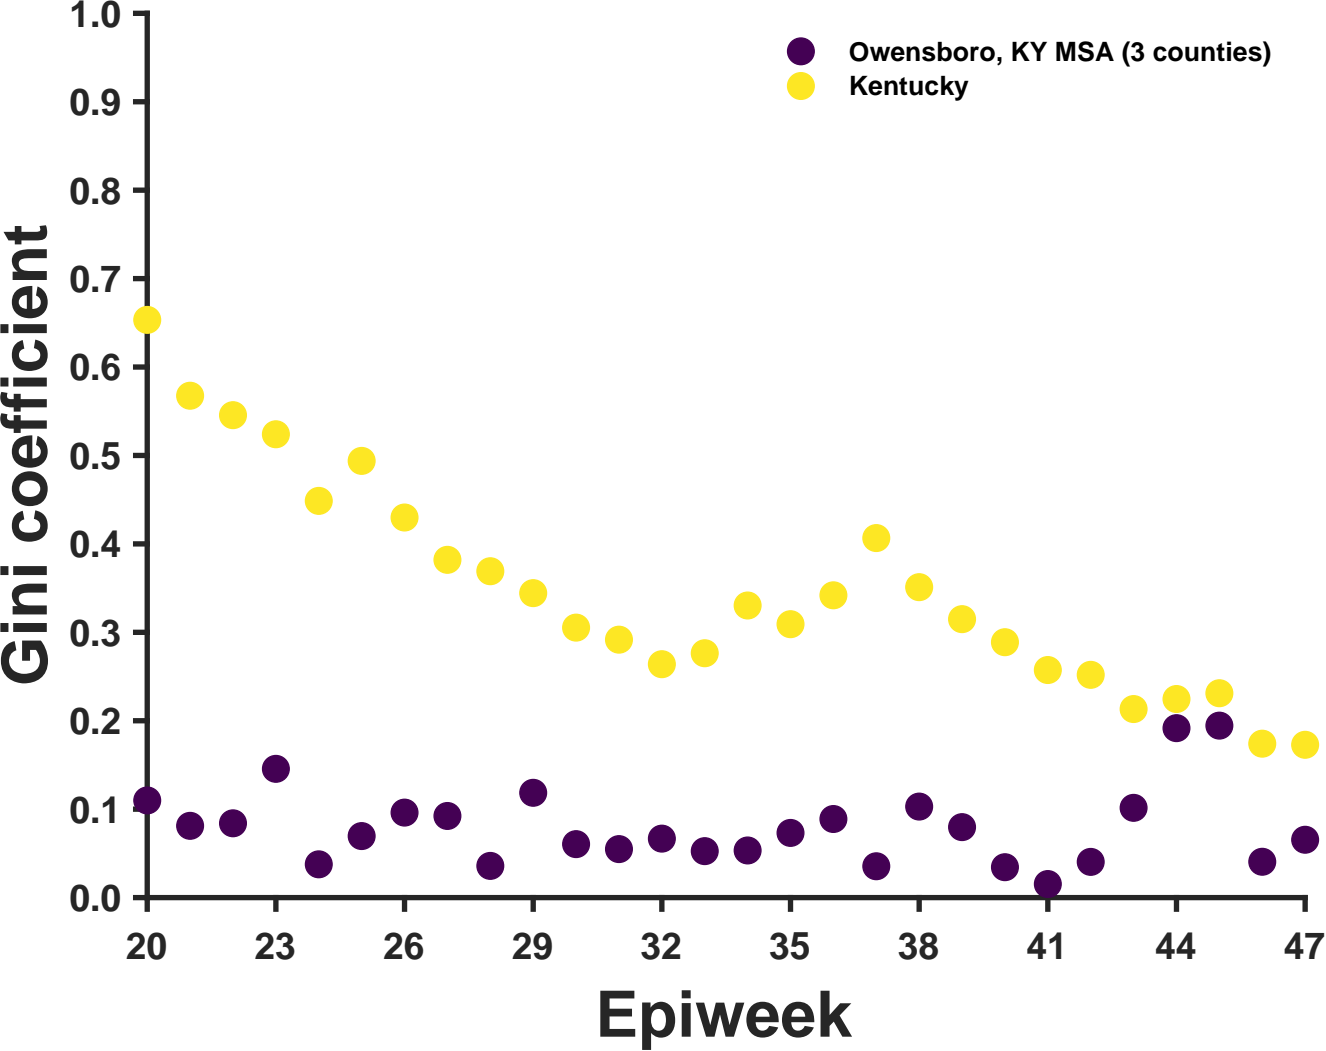

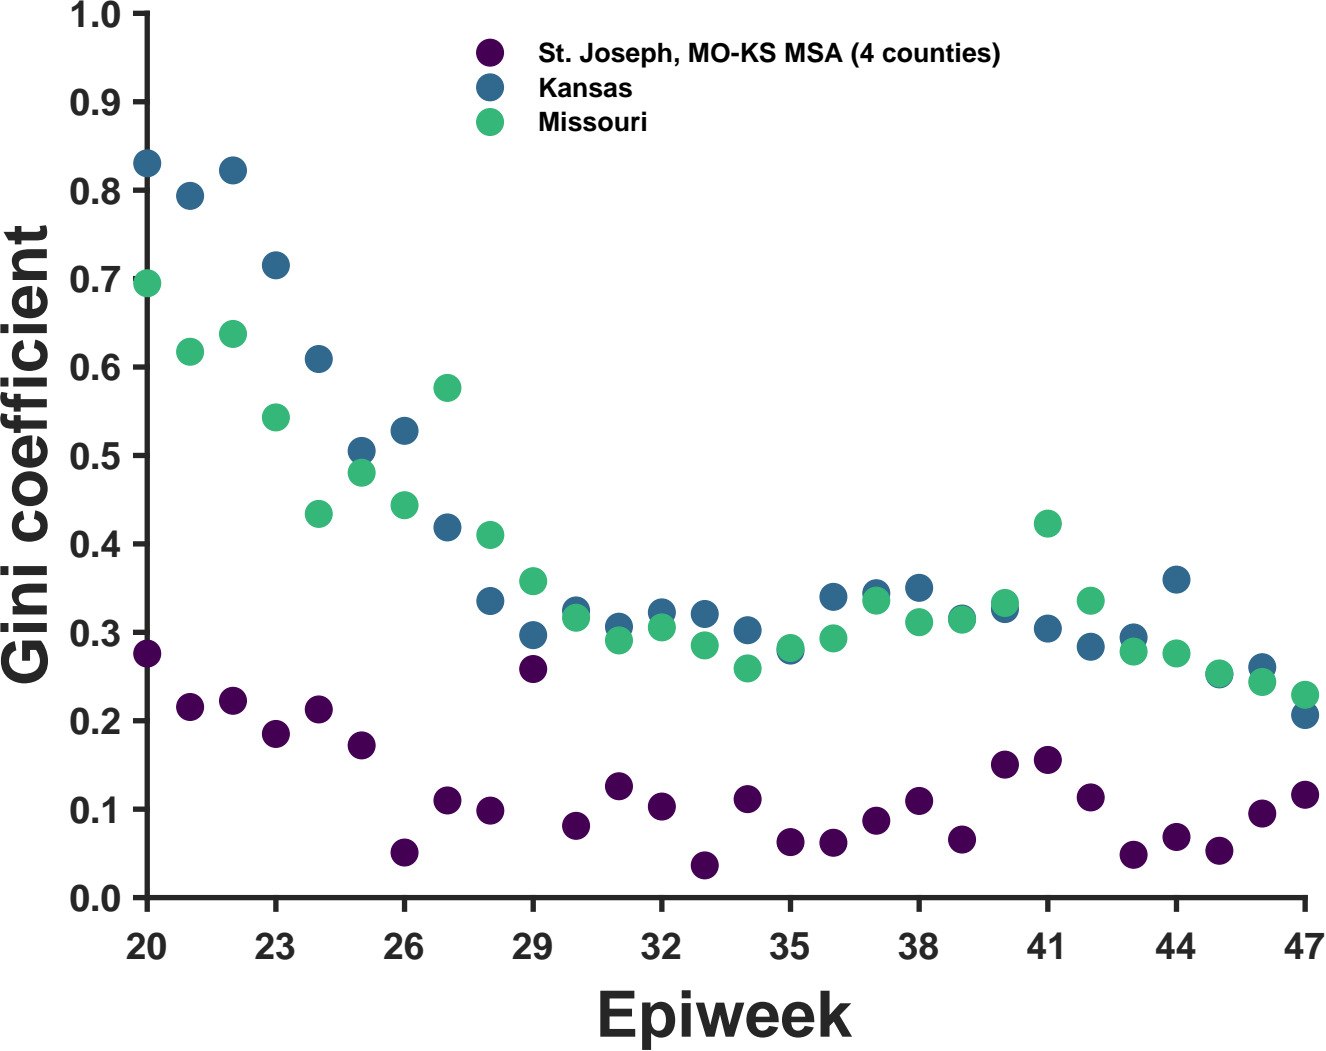

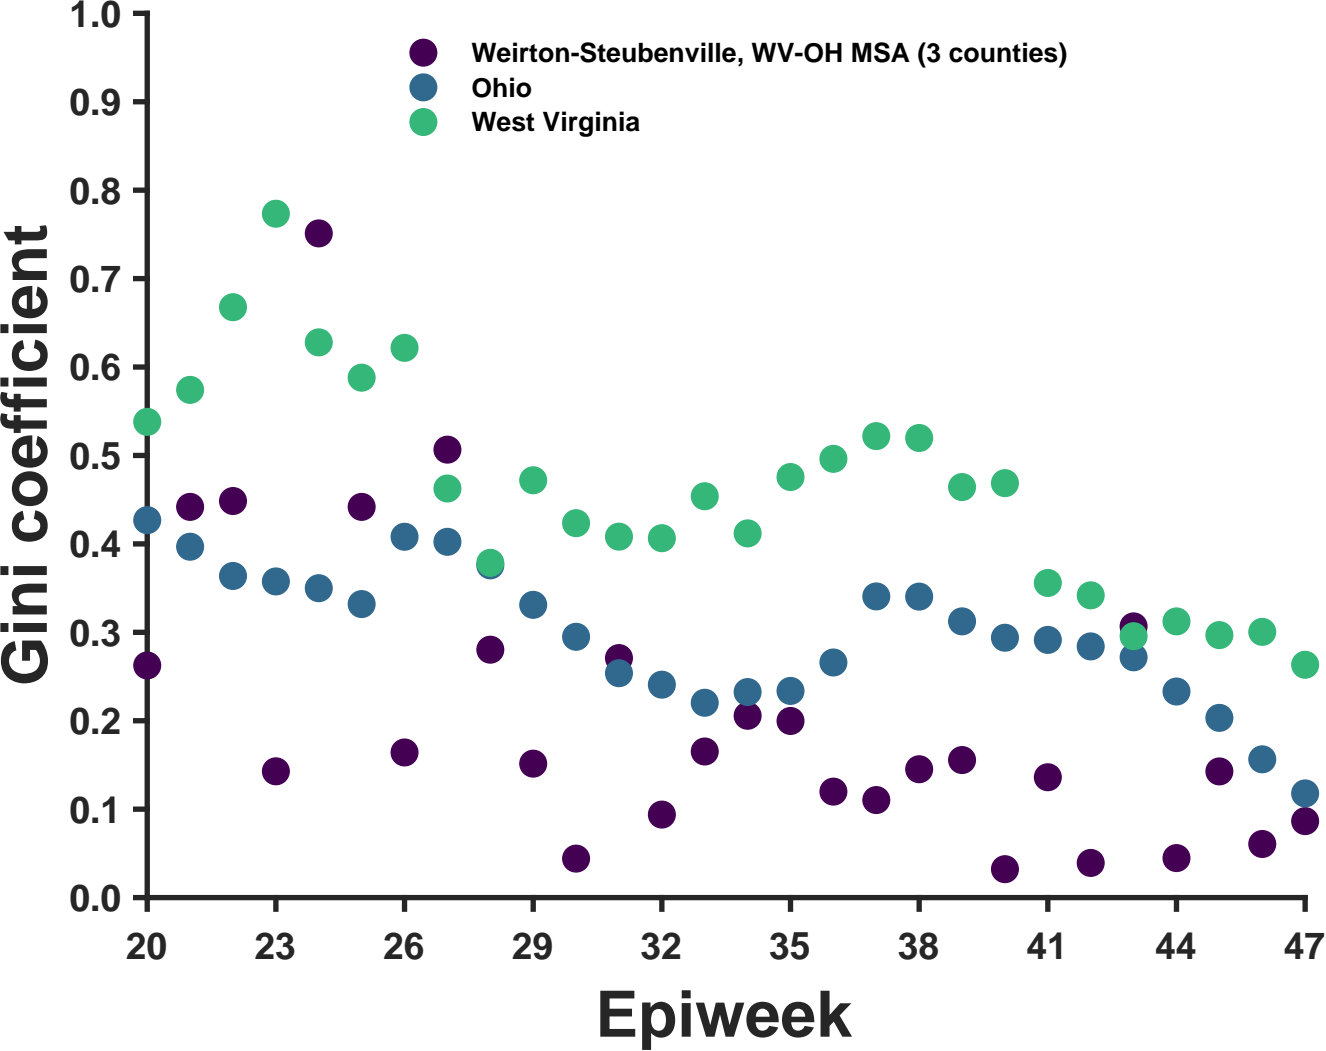

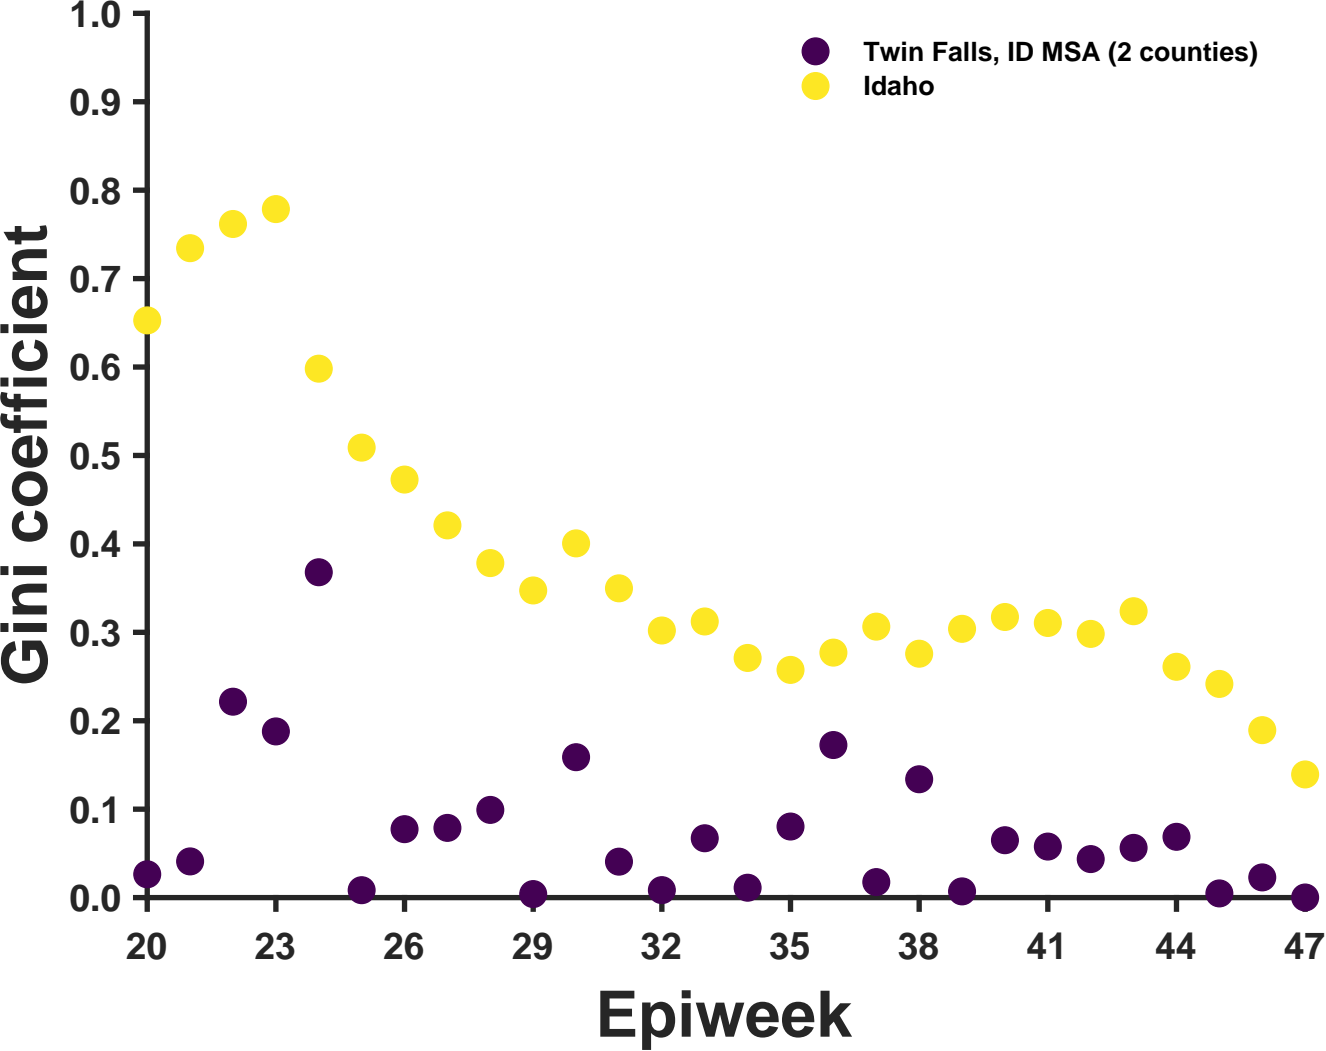



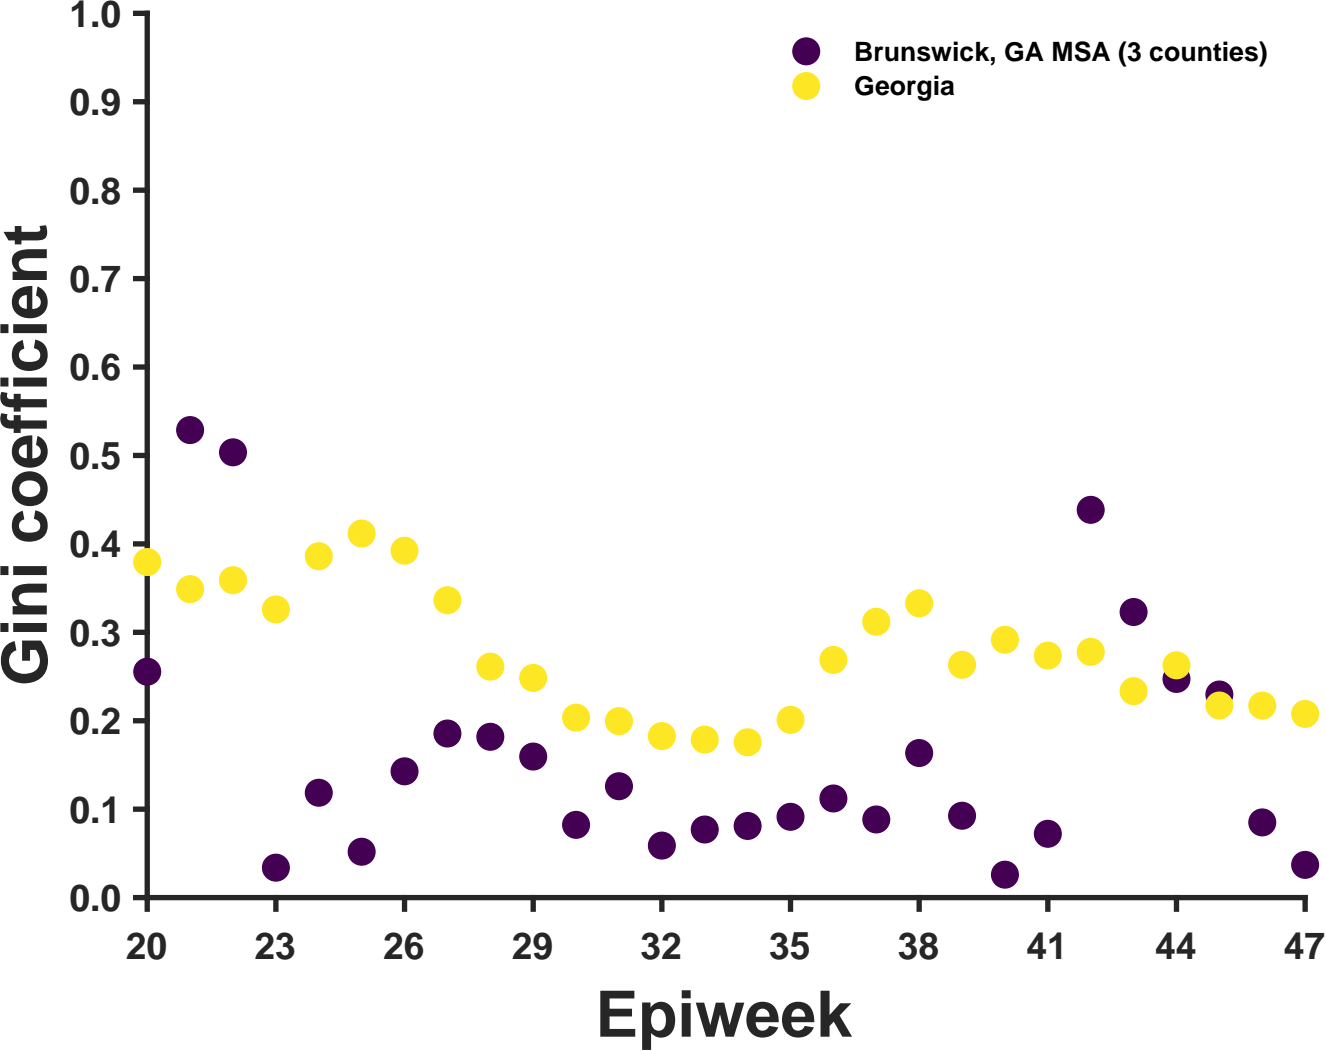

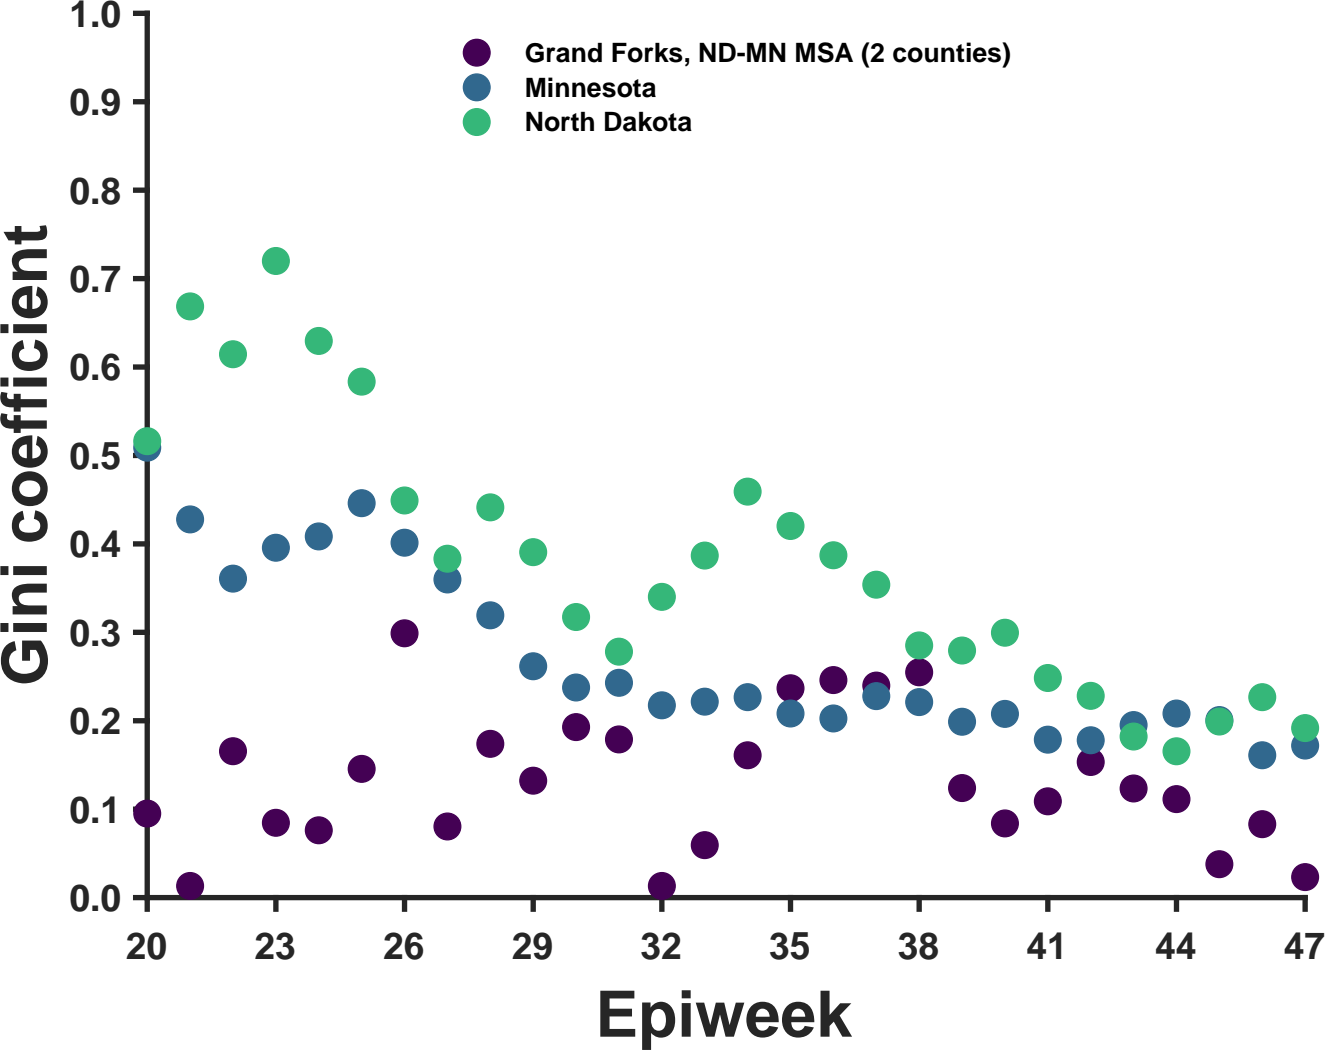

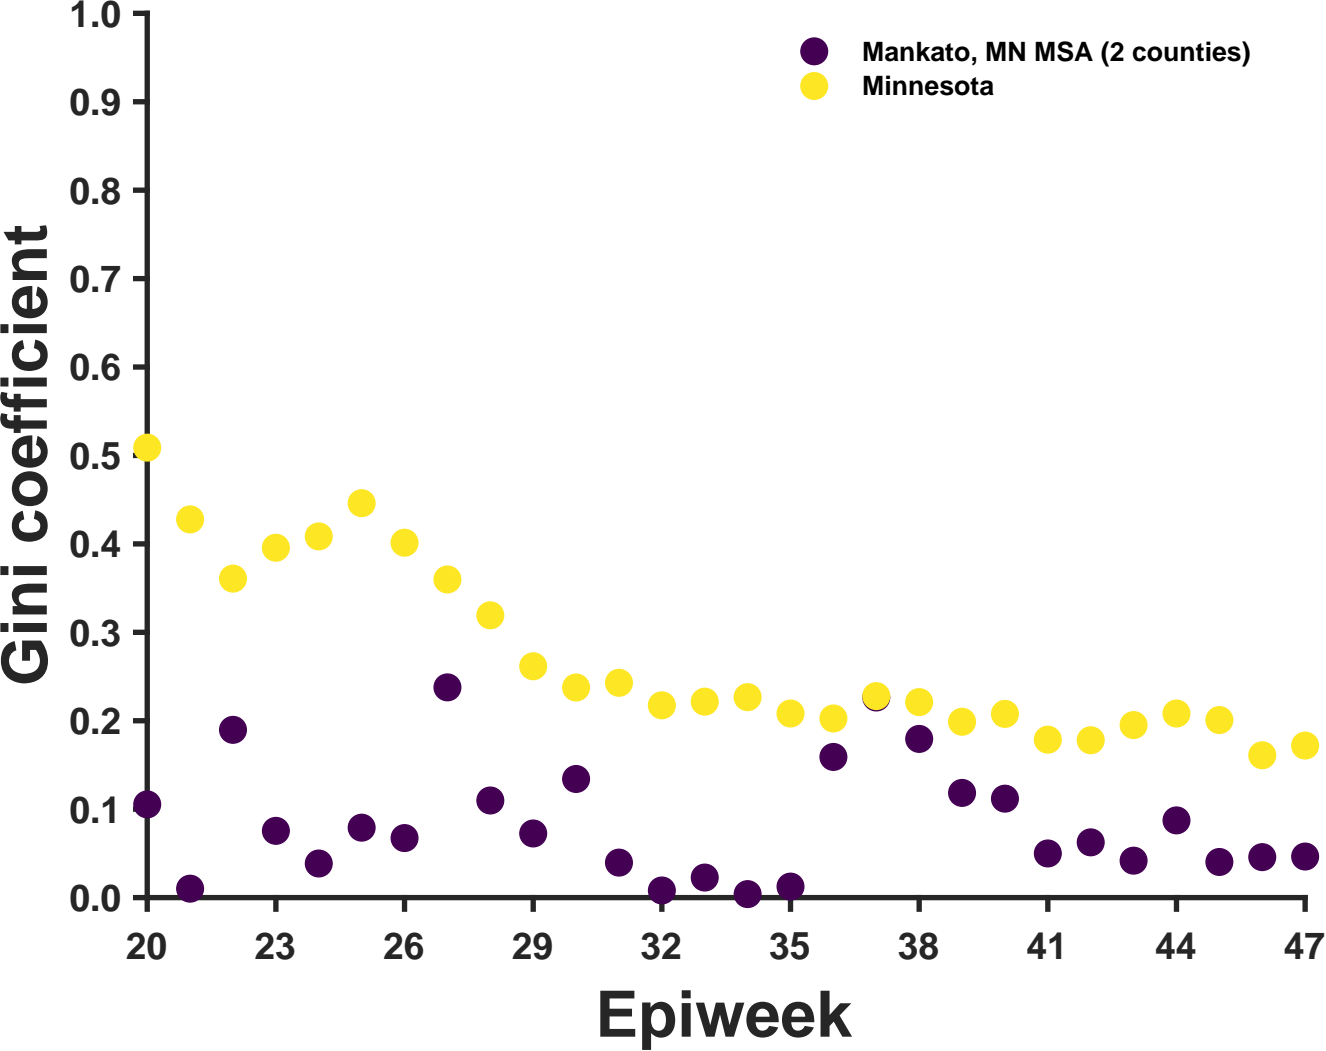

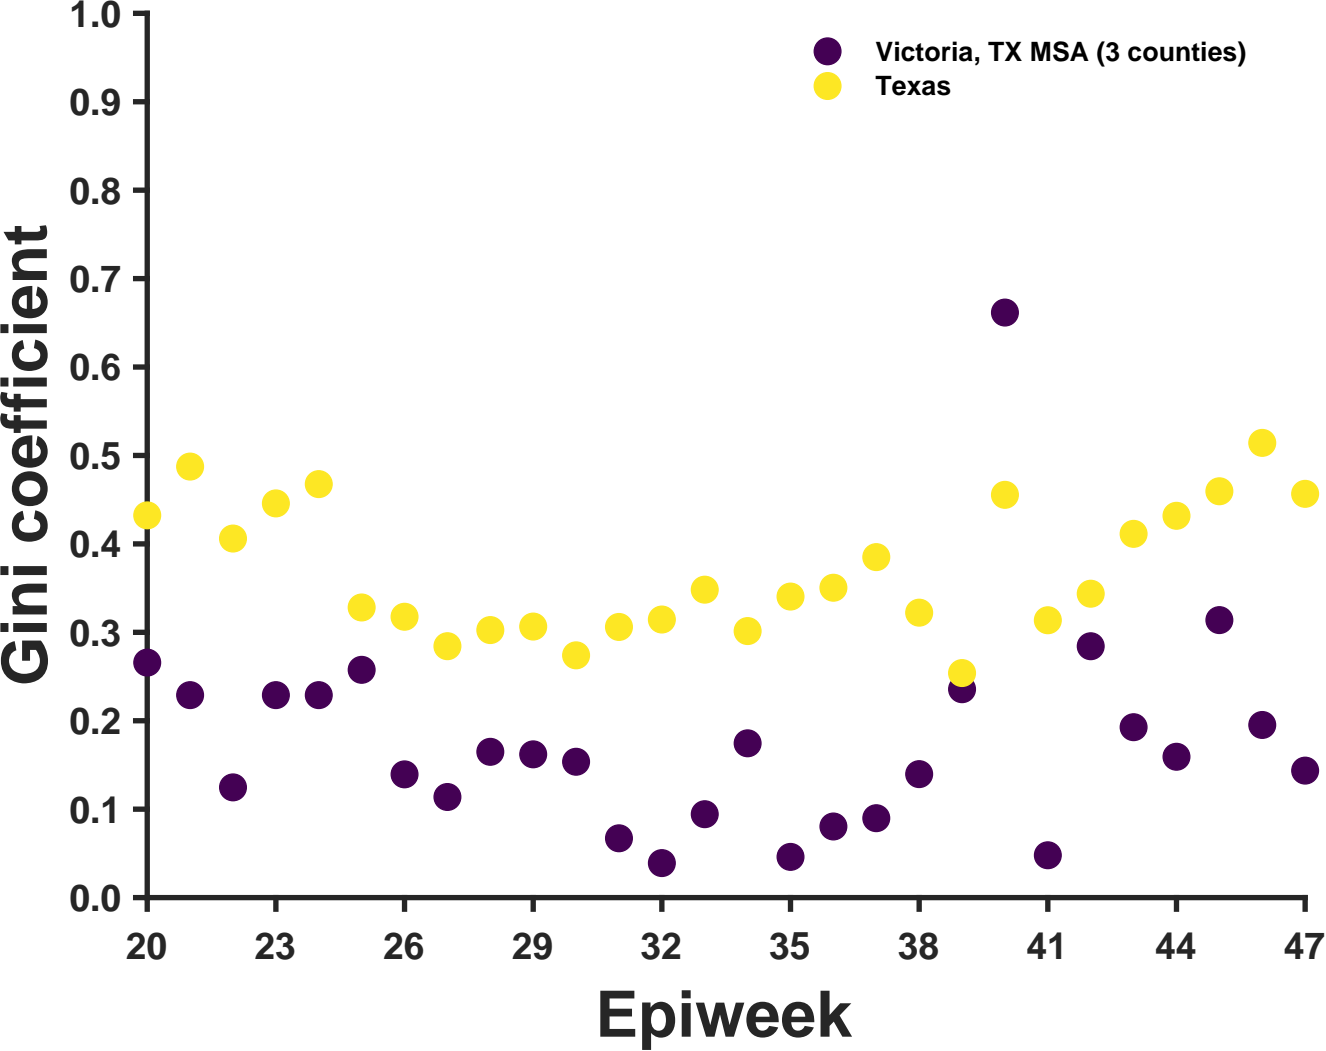

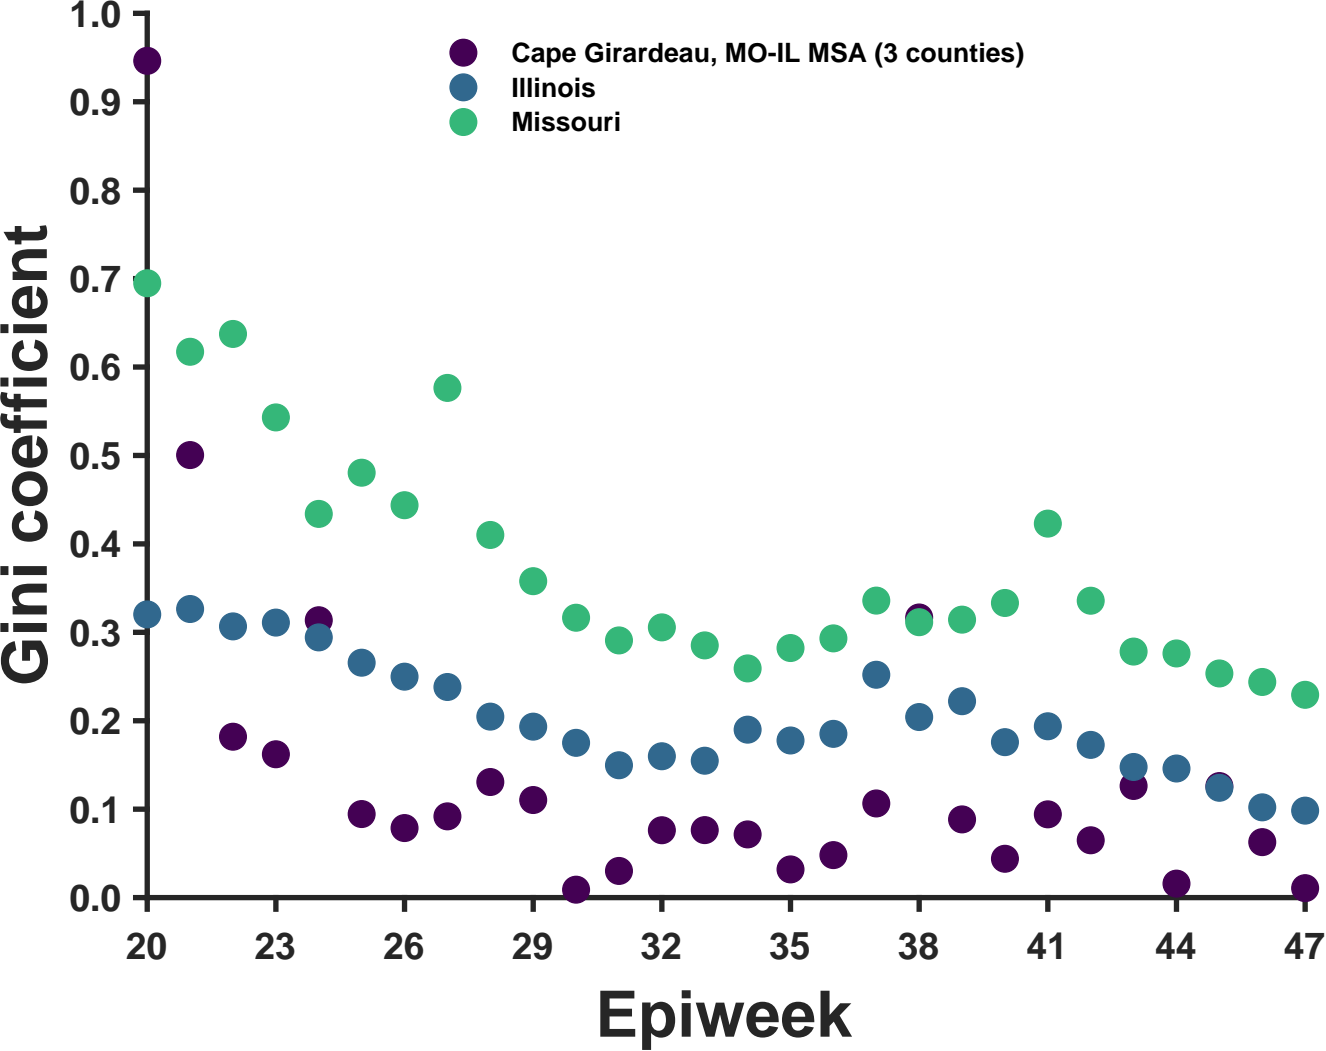

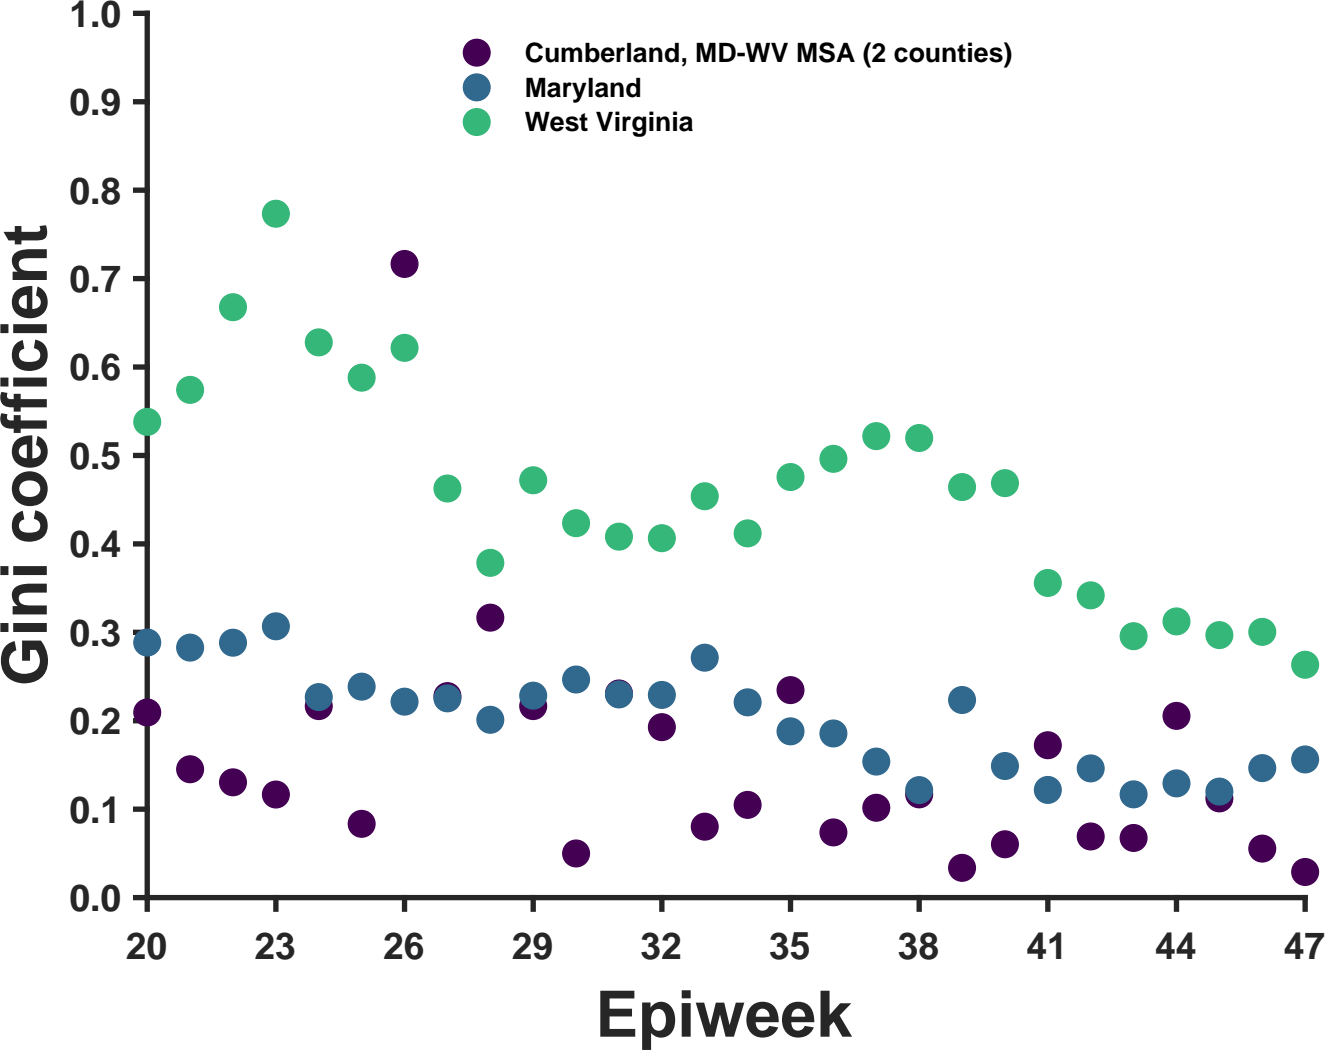

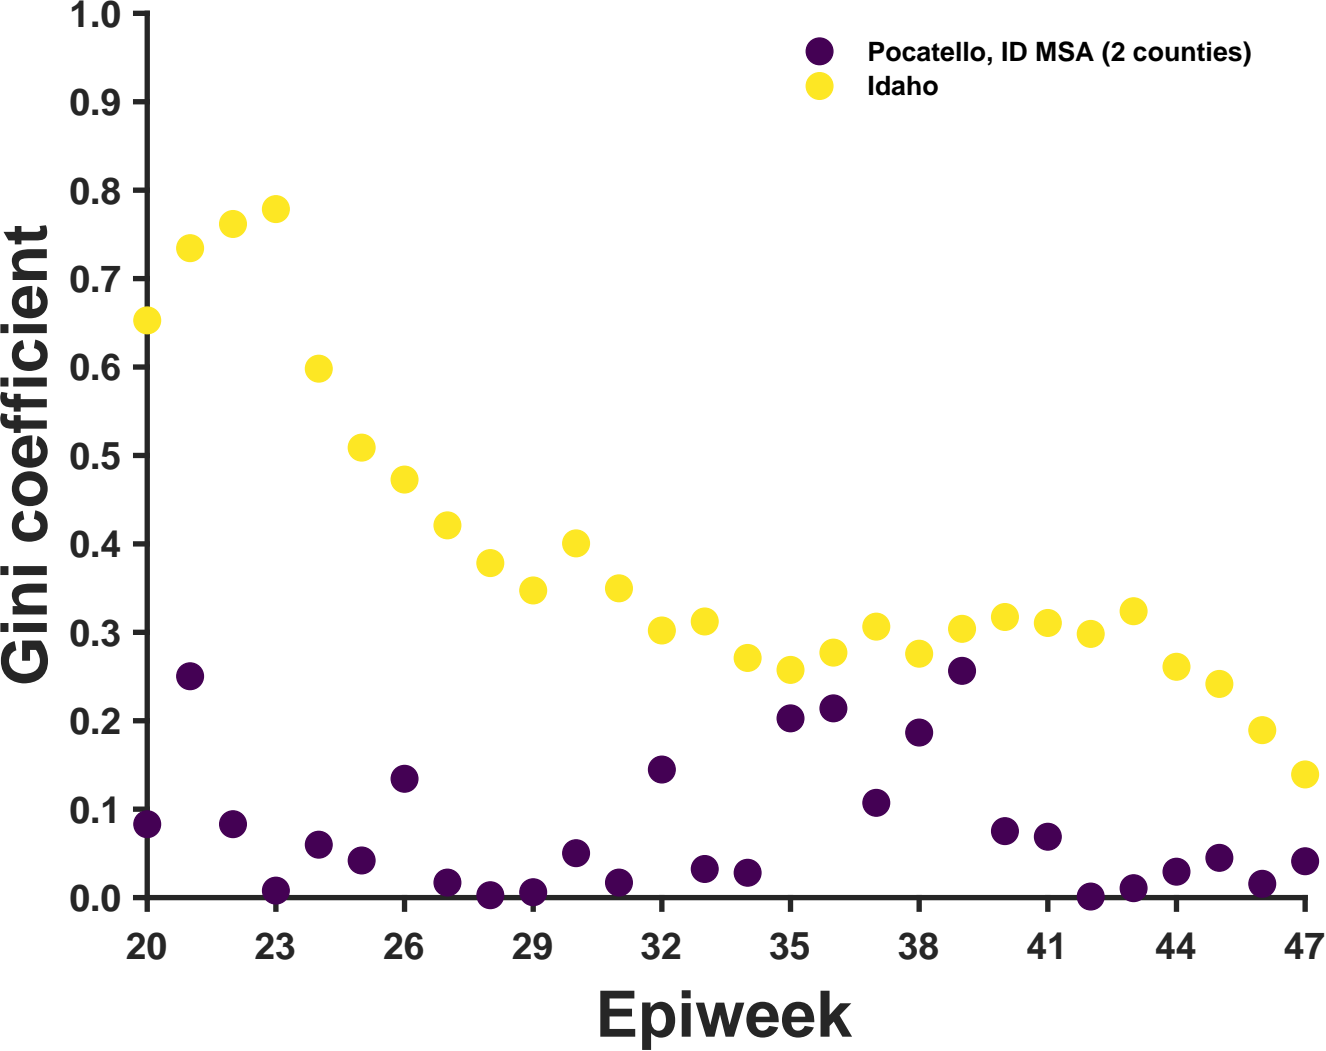

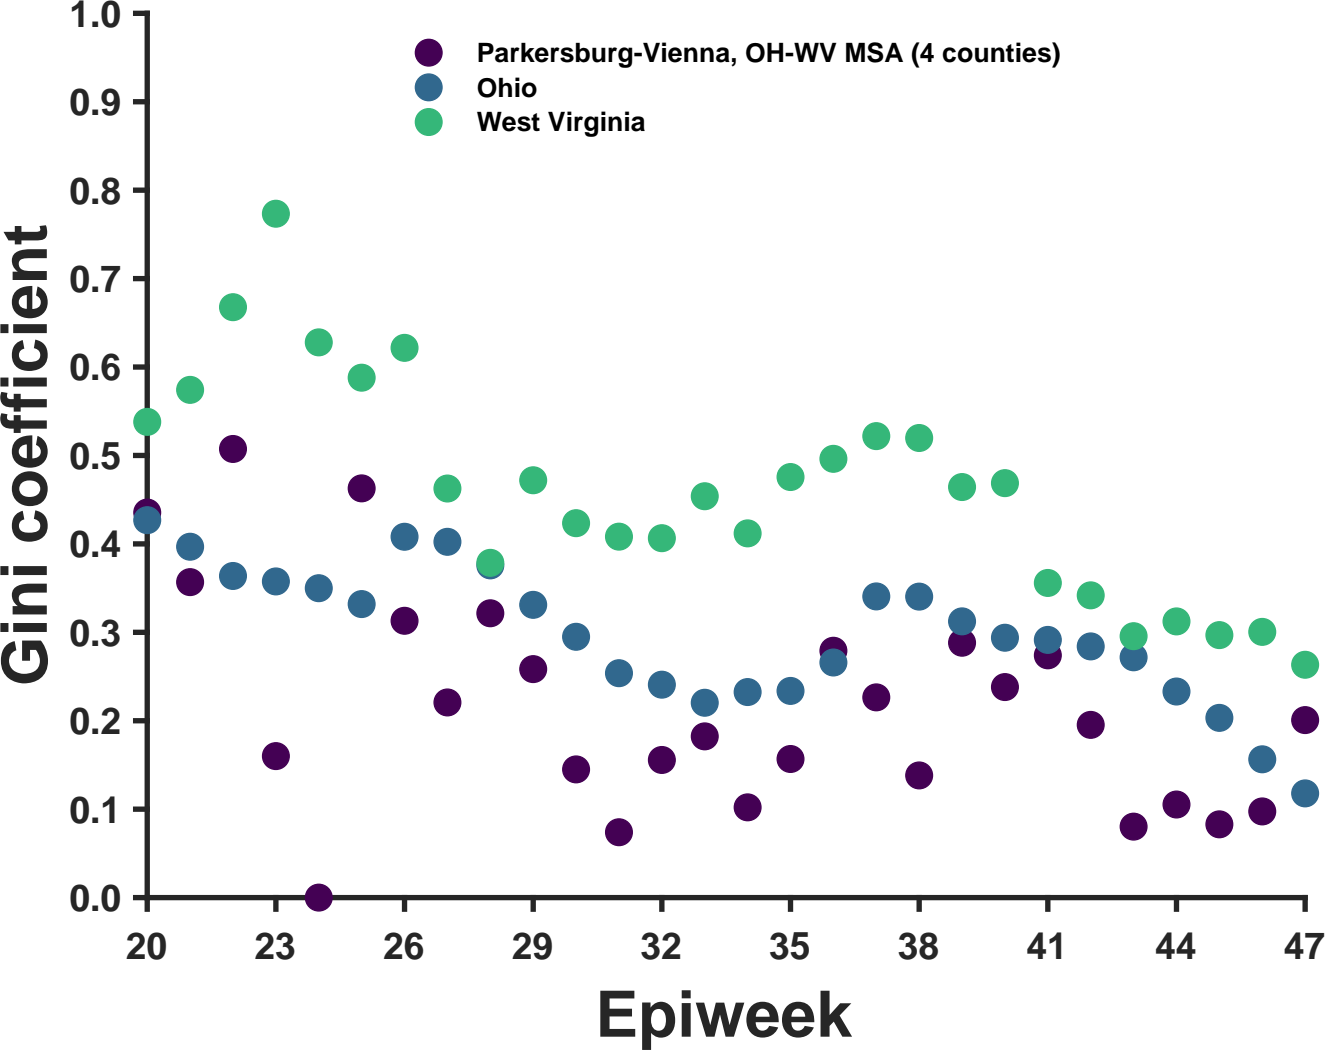



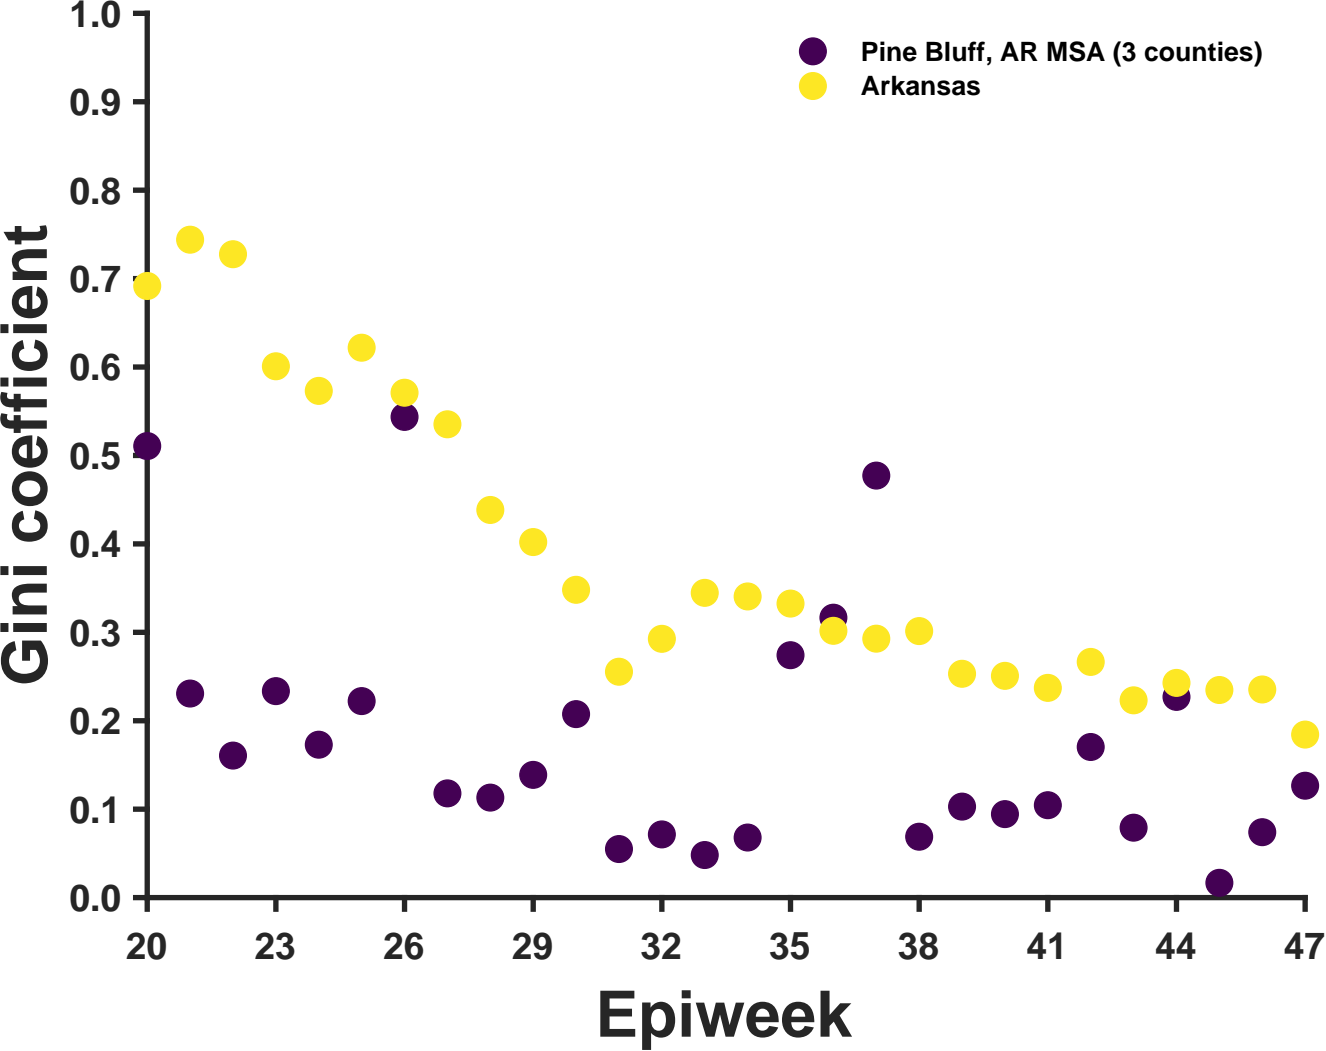

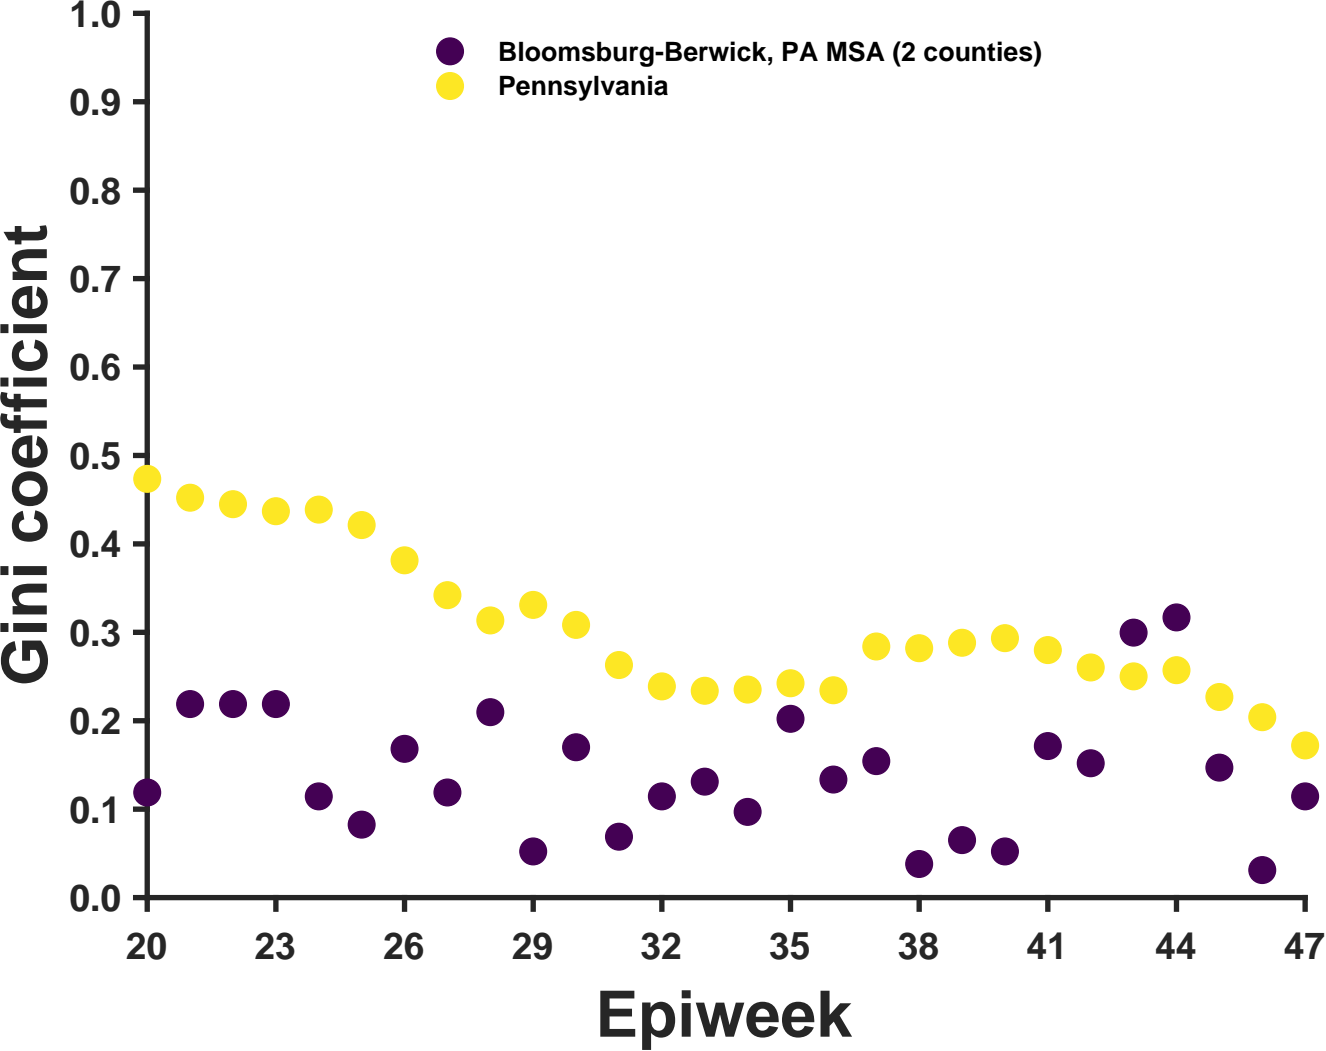

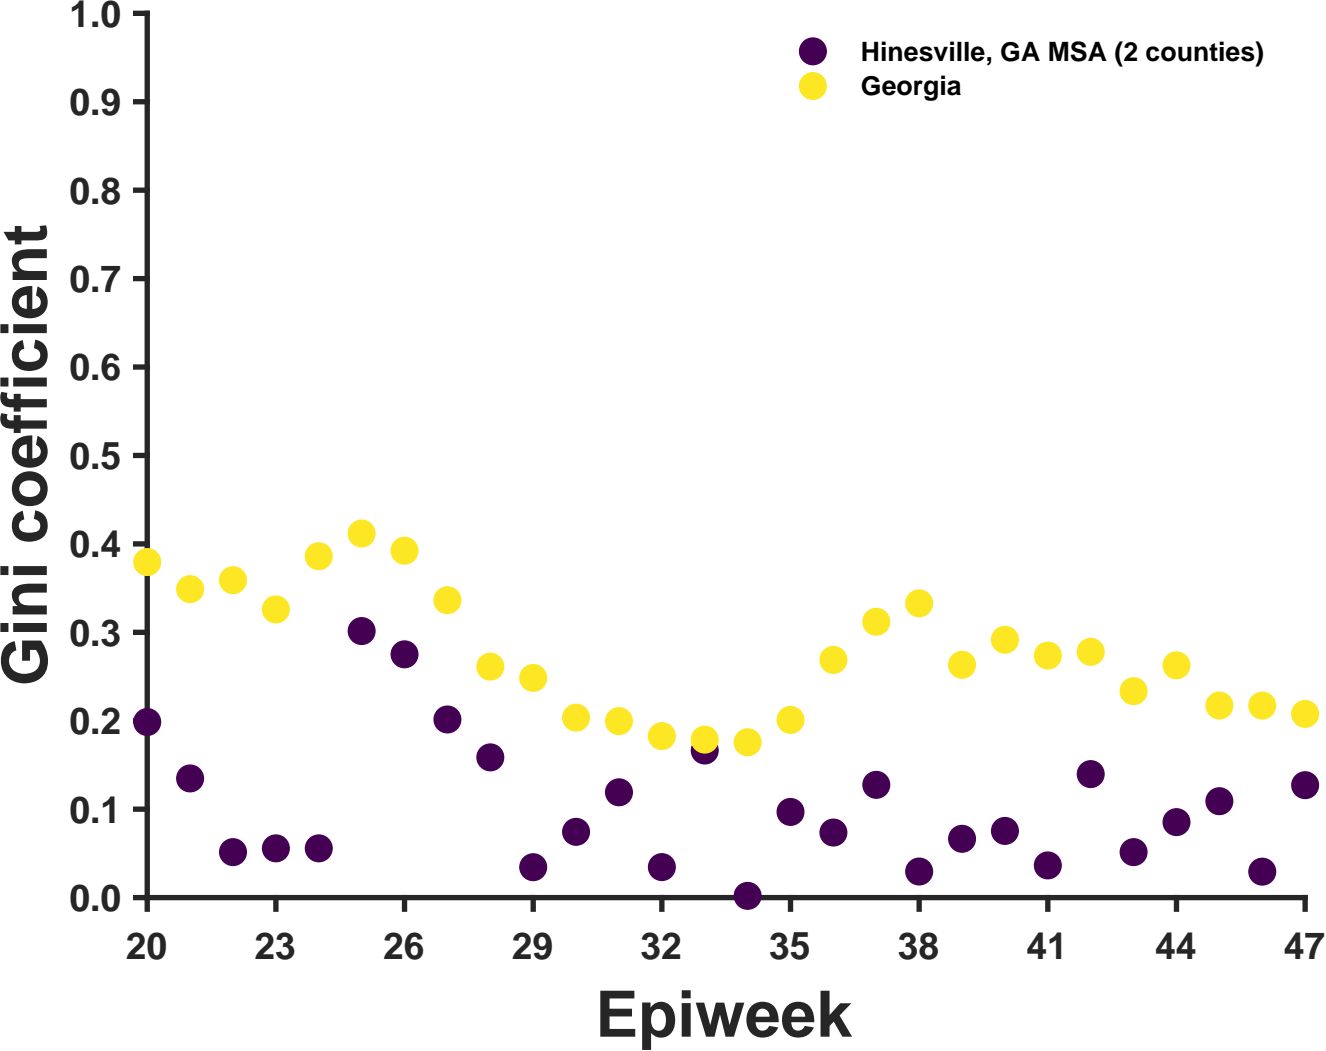

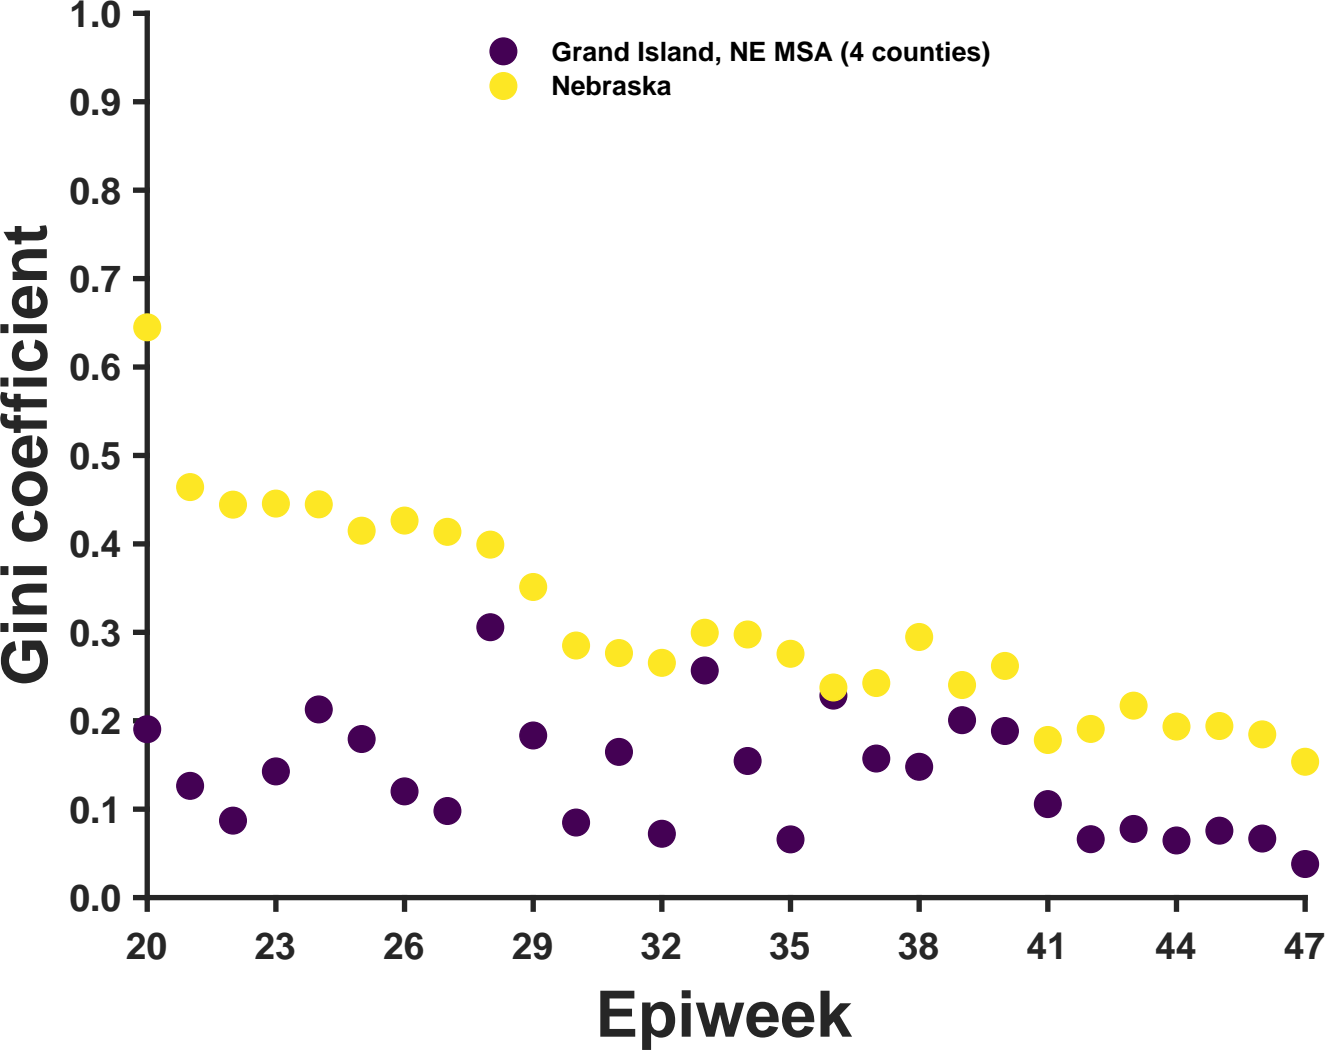

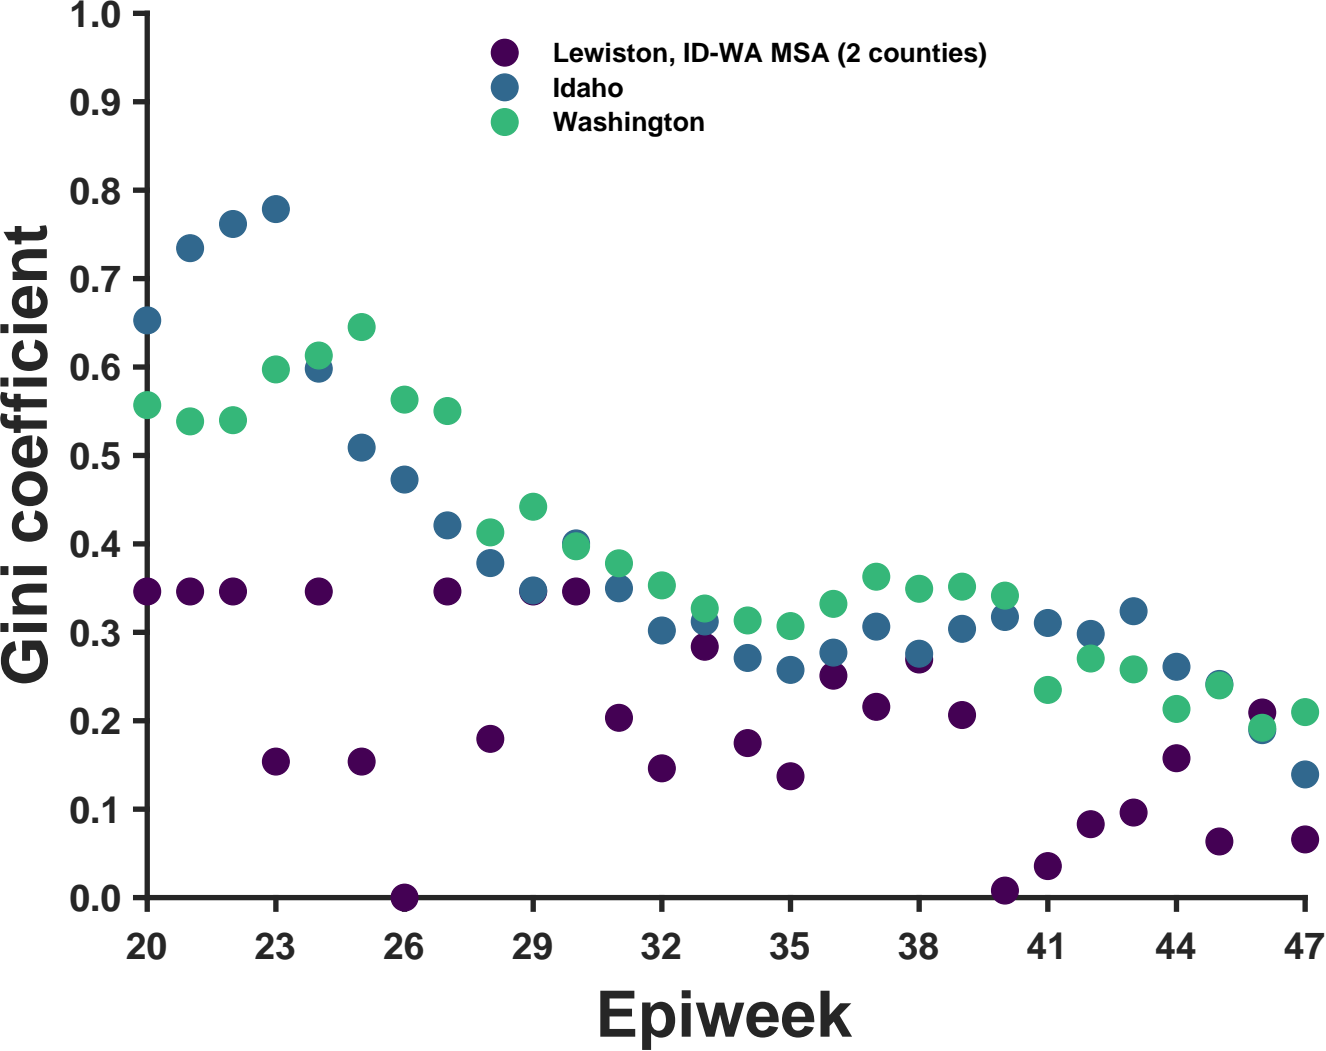

Supplement: Supplementary file [file media-4.pdf]
